# Supplementary material for: The Proteome Map and PeptideAtlas of a widely cultivated tropical water fish Labeo rohita: A resource for the Aquaculture Community
Source: Research Square preprint supplement (doi:10.21203/rs.3.rs-397364/v1), 2021-04-12
Supplement: Supplementary file 1 [file 466ec98c9d54268f11d8f583.xlsx]

## Sheet: Description_of_Worksheets
			Table name	Description
			Proteins and peptides for SRM	List of proteins (taken for SRMexperiment) along with their expression pattern in shotgun data and peptides taken for SRM exepriment
			Transition_list_SRM_19_86	Transition list for scheduled SRM run for 86 peptides of 19 proteins run across three organs; eye, female gonad and male gonad.
			Remaining sheets	Input data for nine SRM box plots (Fig. 6b-d) followed by few other SRM proteins.

## Sheet: Proteins and peptides for SRM
S.no.	NCBI Accession	Uniprot ID	Protein name	Protein	Abundance_Eye (Shotgun)	Abundance_FG (Shotgun)	Abundance_MG (Shotgun)		S.no.	NCBI id	Uniprot id	Protein name	Protein	Peptide Sequence
1	RXN26965.1	A0A498NC64	Rod cGMP-Specific 3, 5 -Cyclic Phosphodiesterase Subunit Beta-Li	Cone GNAT1	30.35	0	0		1	RXN15248.1	A0A498M321	MateRNAl DNA Replication Licensing Factor Mcm3-Like Isoform X1	MCM3-like isoform X1	DLVASIDTTYAK
2	RXN10746.1	A0A498LUF4	Lengsin-Like Isoform X2	Lengsin-like isoform X2	29.7	0	0		2	RXN15248.1	A0A498M321	MateRNAl DNA Replication Licensing Factor Mcm3-Like Isoform X1	MCM3-like isoform X1	YVLFTAPR
3	RXN12081.1	A0A498LV54	Cone cGMP-Specific 3, 5 -Cyclic Phosphodiesterase Subunit Alpha	Cone GNAT2	29.2876	0	0		3	RXN15248.1	A0A498M321	MateRNAl DNA Replication Licensing Factor Mcm3-Like Isoform X1	MCM3-like isoform X1	DNVLHGHR
4	RXN26838.1	A0A498MY13	Girdin-Like Isoform X1	Girdin-like isoform X1	28.2403	0	0		4	RXN20316.1	A0A498MNS9	Coiled-Coil Domain-Containing Protein 127	CCDC127	HTLC[+57]GFC[+57]YEK
5	RXN28171.1	A0A498N5T3	Visinin-Like Protein	Visinin-like protein	26.1658	0	0		5	RXN20316.1	A0A498MNS9	Coiled-Coil Domain-Containing Protein 127	CCDC127	TAAHLEVELEK
6	RXN09507.1	A0A498M4Z4	Zinc Phosphodiesterase ELAC 2	ELAC2	0	0	28.5527		6	RXN20316.1	A0A498MNS9	Coiled-Coil Domain-Containing Protein 127	CCDC127	AQALLQELEVK
7	RXN11994.1	A0A498LYP6	Box C D SnoRNA 1	Box C D snoRNA1	0	0	26.3554		7	RXN20316.1	A0A498MNS9	Coiled-Coil Domain-Containing Protein 127	CCDC127	DPTGAELNLEEDLR
8	RXN14883.1	A0A498M4T4	DNA Topoisomerase Mitochondrial-Like Isoform X1	TOP1MT isoform X1	0	0	28.0305		8	RXN20316.1	A0A498MNS9	Coiled-Coil Domain-Containing Protein 127	CCDC127	NGNLMWLYLR
9	RXN20436.1	A0A498MP71	Tudor Domain-Containing 5-Like Protein	TDRD5-like protein	0	0	24.1665		9	RXN20786.1	A0A498MQD4	Wap Four-Disulfide Core Domain 3-Like Isoform X2	WFDC3-like isoform X2	AQPEKPGVC[+57]R
10	RXN22339.1	A0A498MLP7	Kelch Repeat And BTB Domain-Containing 8	KBTBD8	0	0	28.386		10	RXN20786.1	A0A498MQD4	Wap Four-Disulfide Core Domain 3-Like Isoform X2	WFDC3-like isoform X2	AEPEKPGAC[+57]PTINFEK
11	RXN23652.1	A0A498MVL1	Putative ATP-Dependent RNA Helicase YTHDC2 Isoform X1	YTHDC2 isoform X1	0	0	26.3124		11	RXN20786.1	A0A498MQD4	Wap Four-Disulfide Core Domain 3-Like Isoform X2	WFDC3-like isoform X2	EKPGVC[+57]PR
12	RXN23774.1	A0A498MWE0	Putative E3 Ubiquitin- Ligase HECTD4 Isoform X2	HECTD4 isoform X2	0	21.6765	0		12	RXN06915.1	A0A498LNH2	Glycosyltransferase 8 Domain-Containing 1 Isoform X1	GLT8D1 isoform X1	VKPLTFAR
13	RXN34201.1	A0A498NQU3	Ribosome Biogenesis NSA2-Like Protein	NSA2-like protein	0	23.2697	0		13	RXN06915.1	A0A498LNH2	Glycosyltransferase 8 Domain-Containing 1 Isoform X1	GLT8D1 isoform X1	FFLPVFLPDAEK
14	RXN20316.1	A0A498MNS9	Coiled-Coil Domain-Containing Protein 127	CCDC127	0	23.98	0		14	RXN06915.1	A0A498LNH2	Glycosyltransferase 8 Domain-Containing 1 Isoform X1	GLT8D1 isoform X1	ELFDTGLK
15	RXN20786.1	A0A498MQD4	Wap Four-Disulfide Core Domain 3-Like Isoform X2	WFDC3-like isoform X2	0	24.5149	0		15	RXN06915.1	A0A498LNH2	Glycosyltransferase 8 Domain-Containing 1 Isoform X1	GLT8D1 isoform X1	GAGNQNSYIGFLDFK
16	RXN06915.1	A0A498LNH2	Glycosyltransferase 8 Domain-Containing 1 Isoform X1	GLT8D1 isoform X1	0	25.1672	0		16	RXN06915.1	A0A498LNH2	Glycosyltransferase 8 Domain-Containing 1 Isoform X1	GLT8D1 isoform X1	HLGATGAGNR
17	RXN15248.1	A0A498M321	Maternal DNA Replication Licensing Factor Mcm3-Like Isoform X1	MCM3-like isoform X1	0	25.8526	0		17	RXN26779.1	A0A498MXN1	Spindly Isoform X1	Spindly isoform X1	GNSLFSEVEDK
18	RXN26779.1	A0A498MXN1	Spindly Isoform X1	Spindly isoform X1	0	26.8676	0		18	RXN26779.1	A0A498MXN1	Spindly Isoform X1	Spindly isoform X1	EGELMDETYYTDLLK
19	RXN26748.1	A0A498MXT9	Zona Pellucida Sperm-Binding 2-Like Isoform X2	ZP2-like isoform X2	0	28.1682	0		19	RXN26779.1	A0A498MXN1	Spindly Isoform X1	Spindly isoform X1	LFGTEQALK
									20	RXN26779.1	A0A498MXN1	Spindly Isoform X1	Spindly isoform X1	YTPNEVNK
									21	RXN26779.1	A0A498MXN1	Spindly Isoform X1	Spindly isoform X1	SPVSDSNSK
									22	RXN26779.1	A0A498MXN1	Spindly Isoform X1	Spindly isoform X1	NNILATQSPTALSIK
									23	RXN26779.1	A0A498MXN1	Spindly Isoform X1	Spindly isoform X1	EDSDDHSK
									24	RXN23774.1	A0A498MWE0	Putative E3 Ubiquitin- Ligase HECTD4 Isoform X2	HECTD4 isoform X2	ELIFHLLAELLR
									25	RXN23774.1	A0A498MWE0	Putative E3 Ubiquitin- Ligase HECTD4 Isoform X2	HECTD4 isoform X2	GLTLLLILR
									26	RXN23774.1	A0A498MWE0	Putative E3 Ubiquitin- Ligase HECTD4 Isoform X2	HECTD4 isoform X2	AC[+57]NAHGGLFK
									27	RXN23774.1	A0A498MWE0	Putative E3 Ubiquitin- Ligase HECTD4 Isoform X2	HECTD4 isoform X2	RPITKPPAK
									28	RXN23774.1	A0A498MWE0	Putative E3 Ubiquitin- Ligase HECTD4 Isoform X2	HECTD4 isoform X2	FTGEEVHGTSGSFR
									29	RXN23774.1	A0A498MWE0	Putative E3 Ubiquitin- Ligase HECTD4 Isoform X2	HECTD4 isoform X2	DGGPDTAHVPPYPMK
									30	RXN34201.1	A0A498NQU3	Ribosome Biogenesis NSA2-Like Protein	NSA2-like protein	VC[+57]FVGDGFTR
									31	RXN34201.1	A0A498NQU3	Ribosome Biogenesis NSA2-Like Protein	NSA2-like protein	AHVTHPELK
									32	RXN34201.1	A0A498NQU3	Ribosome Biogenesis NSA2-Like Protein	NSA2-like protein	ATFC[+57]LPILGVK
									33	RXN26748.1	A0A498MXT9	Zona Pellucida Sperm-Binding 2-Like Isoform X2	ZP2-like isoform X2	TLTPEEMGSR
									34	RXN26748.1	A0A498MXT9	Zona Pellucida Sperm-Binding 2-Like Isoform X2	ZP2-like isoform X2	HYAMTFTESHIVVK
									35	RXN26748.1	A0A498MXT9	Zona Pellucida Sperm-Binding 2-Like Isoform X2	ZP2-like isoform X2	YGSTPSSQLK
									36	RXN26748.1	A0A498MXT9	Zona Pellucida Sperm-Binding 2-Like Isoform X2	ZP2-like isoform X2	LGHMELNDK
									37	RXN26748.1	A0A498MXT9	Zona Pellucida Sperm-Binding 2-Like Isoform X2	ZP2-like isoform X2	EISLAC[+57]PFFLK
									38	RXN09507.1	A0A498M4Z4	Zinc Phosphodiesterase ELAC 2	ELAC2	DSSLVVAYVC[+57]K
									39	RXN09507.1	A0A498M4Z4	Zinc Phosphodiesterase ELAC 2	ELAC2	ASLHVPNVR
									40	RXN09507.1	A0A498M4Z4	Zinc Phosphodiesterase ELAC 2	ELAC2	EQDDLNQEAATK
									41	RXN22339.1	A0A498MLP7	Kelch Repeat And BTB Domain-Containing 8	KBTBD8	EADLPEVFAK
									42	RXN22339.1	A0A498MLP7	Kelch Repeat And BTB Domain-Containing 8	KBTBD8	LNGTNGC[+57]PQR
									43	RXN22339.1	A0A498MLP7	Kelch Repeat And BTB Domain-Containing 8	KBTBD8	LC[+57]KPPNDLR
									44	RXN23652.1	A0A498MVL1	Putative ATP-Dependent RNA Helicase YTHDC2 Isoform X1	YTHDC2 isoform X1	QNQYPDINTR
									45	RXN23652.1	A0A498MVL1	Putative ATP-Dependent RNA Helicase YTHDC2 Isoform X1	YTHDC2 isoform X1	GPSELDC[+57]FR
									46	RXN23652.1	A0A498MVL1	Putative ATP-Dependent RNA Helicase YTHDC2 Isoform X1	YTHDC2 isoform X1	YFGAC[+57]PVIHIK
									47	RXN23652.1	A0A498MVL1	Putative ATP-Dependent RNA Helicase YTHDC2 Isoform X1	YTHDC2 isoform X1	DVATLEPWLLR
									48	RXN23652.1	A0A498MVL1	Putative ATP-Dependent RNA Helicase YTHDC2 Isoform X1	YTHDC2 isoform X1	FNNMLEHQIPQLLR
									49	RXN11994.1	A0A498LYP6	Box C D SnoRNA 1	Box C D snoRNA1	EHSQEYLAR
									50	RXN11994.1	A0A498LYP6	Box C D SnoRNA 1	Box C D snoRNA1	DANHDQEGK
									51	RXN11994.1	A0A498LYP6	Box C D SnoRNA 1	Box C D snoRNA1	FIMSSSC[+57]ER
									52	RXN20436.1	A0A498MP71	Tudor Domain-Containing 5-Like Protein	TDRD5-like protein	VASPLAAK
									53	RXN20436.1	A0A498MP71	Tudor Domain-Containing 5-Like Protein	TDRD5-like protein	AEPSFEETIFK
									54	RXN20436.1	A0A498MP71	Tudor Domain-Containing 5-Like Protein	TDRD5-like protein	VSAVPPDAVR
									55	RXN20436.1	A0A498MP71	Tudor Domain-Containing 5-Like Protein	TDRD5-like protein	TQLGPDIK
									56	RXN14883.1	A0A498M4T4	DNA Topoisomerase Mitochondrial-Like Isoform X1	TOP1MT isoform X1	C[+57]DFSQIHK
									57	RXN14883.1	A0A498M4T4	DNA Topoisomerase Mitochondrial-Like Isoform X1	TOP1MT isoform X1	LEPPGLFR
									58	RXN14883.1	A0A498M4T4	DNA Topoisomerase Mitochondrial-Like Isoform X1	TOP1MT isoform X1	VPEPPAGHQWK
									59	RXN14883.1	A0A498M4T4	DNA Topoisomerase Mitochondrial-Like Isoform X1	TOP1MT isoform X1	GVAIYFIDK
									60	RXN14883.1	A0A498M4T4	DNA Topoisomerase Mitochondrial-Like Isoform X1	TOP1MT isoform X1	ITTINLNK
									61	RXN12081.1	A0A498LV54	Cone cGMP-Specific 3, 5 -Cyclic Phosphodiesterase Subunit Alpha	Cone GNAT2	TVNVPDVK
									62	RXN12081.1	A0A498LV54	Cone cGMP-Specific 3, 5 -Cyclic Phosphodiesterase Subunit Alpha	Cone GNAT2	NMLAAPLMNGK
									63	RXN12081.1	A0A498LV54	Cone cGMP-Specific 3, 5 -Cyclic Phosphodiesterase Subunit Alpha	Cone GNAT2	LGDVEPYK
									64	RXN12081.1	A0A498LV54	Cone cGMP-Specific 3, 5 -Cyclic Phosphodiesterase Subunit Alpha	Cone GNAT2	ATPDQVQEILNTK
									65	RXN12081.1	A0A498LV54	Cone cGMP-Specific 3, 5 -Cyclic Phosphodiesterase Subunit Alpha	Cone GNAT2	EITPMFDGLNNNR
									66	RXN12081.1	A0A498LV54	Cone cGMP-Specific 3, 5 -Cyclic Phosphodiesterase Subunit Alpha	Cone GNAT2	VDAIENER
									67	RXN12081.1	A0A498LV54	Cone cGMP-Specific 3, 5 -Cyclic Phosphodiesterase Subunit Alpha	Cone GNAT2	AAGEDGGEGGK
									68	RXN26965.1	A0A498NC64	Rod cGMP-Specific 3, 5 -Cyclic Phosphodiesterase Subunit Beta-Li	Cone GNAT1	DVVAVIMAVNK
									69	RXN26965.1	A0A498NC64	Rod cGMP-Specific 3, 5 -Cyclic Phosphodiesterase Subunit Beta-Li	Cone GNAT1	FQVPQEVLVR
									70	RXN26965.1	A0A498NC64	Rod cGMP-Specific 3, 5 -Cyclic Phosphodiesterase Subunit Beta-Li	Cone GNAT1	GTNNLYQVK
									71	RXN26965.1	A0A498NC64	Rod cGMP-Specific 3, 5 -Cyclic Phosphodiesterase Subunit Beta-Li	Cone GNAT1	NAANSNSTSGSGSGSK
									72	RXN10746.1	A0A498LUF4	Lengsin-Like Isoform X2	Lengsin-like isoform X2	SFSTFKPLSEAR
									73	RXN10746.1	A0A498LUF4	Lengsin-Like Isoform X2	Lengsin-like isoform X2	FEATDLHGVSR
									74	RXN10746.1	A0A498LUF4	Lengsin-Like Isoform X2	Lengsin-like isoform X2	SYLELTLSPK
									75	RXN10746.1	A0A498LUF4	Lengsin-Like Isoform X2	Lengsin-like isoform X2	LIC[+57]DPC[+57]TITGVPLR
									76	RXN10746.1	A0A498LUF4	Lengsin-Like Isoform X2	Lengsin-like isoform X2	GALGEPFVQYFIAMK
									77	RXN28171.1	A0A498N5T3	Visinin-Like Protein	Visinin-like protein	SFDQNDDGTLDFK
									78	RXN28171.1	A0A498N5T3	Visinin-Like Protein	Visinin-like protein	SEVAEIC[+57]QAIFK
									79	RXN28171.1	A0A498N5T3	Visinin-Like Protein	Visinin-like protein	SSSEPLEWAAH
									80	RXN26838.1	A0A498MY13	Girdin-Like Isoform X1	Girdin-like isoform X1	LVDMEGER
									81	RXN26838.1	A0A498MY13	Girdin-Like Isoform X1	Girdin-like isoform X1	GEC[+57]EGNDTR
									82	RXN26838.1	A0A498MY13	Girdin-Like Isoform X1	Girdin-like isoform X1	VIDEMNTK
									83	RXN26838.1	A0A498MY13	Girdin-Like Isoform X1	Girdin-like isoform X1	AAESLVEAR
									84	RXN26838.1	A0A498MY13	Girdin-Like Isoform X1	Girdin-like isoform X1	EEALLDVMR
									85	RXN26838.1	A0A498MY13	Girdin-Like Isoform X1	Girdin-like isoform X1	ENLQLGTLNAESK
									86	RXN26838.1	A0A498MY13	Girdin-Like Isoform X1	Girdin-like isoform X1	ANLEEENR

## Sheet: Transition_list_SRM_19_86
Compound	Retention Time (min)	RT Window (min)	Polarity	Precursor (m/z)	Product (m/z)	Collision Energy (V)
DLVASIDTTYAK(+2)	32.09	2	Positive	648.837	583.309	22.4
DLVASIDTTYAK(+2)	32.09	2	Positive	648.837	482.261	22.4
DLVASIDTTYAK(+2)	32.09	2	Positive	648.837	381.213	22.4
DLVASIDTTYAK(+2)	32.09	2	Positive	648.837	292.158	22.4
DLVASIDTTYAK(+2)	32.09	2	Positive	648.837	241.634	22.4
DLVASIDTTYAK(+2)	32.09	2	Positive	648.837	191.11	22.4
YVLFTAPR(+2)	16.44	2	Positive	483.774	591.325	17.4
YVLFTAPR(+2)	16.44	2	Positive	483.774	444.257	17.4
YVLFTAPR(+2)	16.44	2	Positive	483.774	343.209	17.4
YVLFTAPR(+2)	16.44	2	Positive	483.774	296.166	17.4
YVLFTAPR(+2)	16.44	2	Positive	483.774	172.108	17.4
DNVLHGHR(+2)	16.23	2	Positive	474.243	619.342	17.1
DNVLHGHR(+2)	16.23	2	Positive	474.243	506.258	17.1
DNVLHGHR(+2)	16.23	2	Positive	474.243	369.199	17.1
DNVLHGHR(+2)	16.23	2	Positive	474.243	310.175	17.1
DNVLHGHR(+2)	16.23	2	Positive	474.243	185.103	17.1
HTLC[+57.021464]GFC[+57.021464]YEK(+2)	24.62	2	Positive	657.783	746.318	22.6
HTLC[+57.021464]GFC[+57.021464]YEK(+2)	24.62	2	Positive	657.783	599.249	22.6
HTLC[+57.021464]GFC[+57.021464]YEK(+2)	24.62	2	Positive	657.783	439.219	22.6
HTLC[+57.021464]GFC[+57.021464]YEK(+2)	24.62	2	Positive	657.783	373.663	22.6
HTLC[+57.021464]GFC[+57.021464]YEK(+2)	24.62	2	Positive	657.783	300.128	22.6
HTLC[+57.021464]GFC[+57.021464]YEK(+2)	24.62	2	Positive	657.783	220.113	22.6
TAAHLEVELEK(+2)	38.6	2	Positive	620.332	617.35	21.5
TAAHLEVELEK(+2)	38.6	2	Positive	620.332	518.282	21.5
TAAHLEVELEK(+2)	38.6	2	Positive	620.332	389.239	21.5
TAAHLEVELEK(+2)	38.6	2	Positive	620.332	309.179	21.5
TAAHLEVELEK(+2)	38.6	2	Positive	620.332	259.645	21.5
TAAHLEVELEK(+2)	38.6	2	Positive	620.332	195.123	21.5
AQALLQELEVK(+2)	38.67	2	Positive	621.358	617.35	21.5
AQALLQELEVK(+2)	38.67	2	Positive	621.358	488.308	21.5
AQALLQELEVK(+2)	38.67	2	Positive	621.358	375.224	21.5
AQALLQELEVK(+2)	38.67	2	Positive	621.358	244.658	21.5
DPTGAELNLEEDLR(+2)	37.32	2	Positive	786.381	1456.73	26.5
DPTGAELNLEEDLR(+2)	37.32	2	Positive	786.381	661.315	26.5
DPTGAELNLEEDLR(+2)	37.32	2	Positive	786.381	532.273	26.5
DPTGAELNLEEDLR(+2)	37.32	2	Positive	786.381	403.23	26.5
DPTGAELNLEEDLR(+2)	37.32	2	Positive	786.381	728.868	26.5
DPTGAELNLEEDLR(+2)	37.32	2	Positive	786.381	331.161	26.5
DPTGAELNLEEDLR(+2)	37.32	2	Positive	786.381	266.64	26.5
DPTGAELNLEEDLR(+2)	37.32	2	Positive	786.381	202.119	26.5
NGNLMWLYLR(+2)	37.54	2	Positive	640.334	750.43	22.1
NGNLMWLYLR(+2)	37.54	2	Positive	640.334	564.35	22.1
NGNLMWLYLR(+2)	37.54	2	Positive	640.334	451.266	22.1
NGNLMWLYLR(+2)	37.54	2	Positive	640.334	282.679	22.1
NGNLMWLYLR(+2)	37.54	2	Positive	640.334	226.137	22.1
AQPEKPGVC[+57.021464]R(+2)	23.7	2	Positive	571.292	588.292	20
AQPEKPGVC[+57.021464]R(+2)	23.7	2	Positive	571.292	491.239	20
AQPEKPGVC[+57.021464]R(+2)	23.7	2	Positive	571.292	434.218	20
AQPEKPGVC[+57.021464]R(+2)	23.7	2	Positive	571.292	471.745	20
AQPEKPGVC[+57.021464]R(+2)	23.7	2	Positive	571.292	294.65	20
AQPEKPGVC[+57.021464]R(+2)	23.7	2	Positive	571.292	246.123	20
AQPEKPGVC[+57.021464]R(+2)	23.7	2	Positive	571.292	217.613	20
AEPEKPGAC[+57.021464]PTINFEK(+2)	31.38	2	Positive	894.435	650.351	29.7
AEPEKPGAC[+57.021464]PTINFEK(+2)	31.38	2	Positive	894.435	423.224	29.7
AEPEKPGAC[+57.021464]PTINFEK(+2)	31.38	2	Positive	894.435	617.3	29.7
AEPEKPGAC[+57.021464]PTINFEK(+2)	31.38	2	Positive	894.435	424.729	29.7
AEPEKPGAC[+57.021464]PTINFEK(+2)	31.38	2	Positive	894.435	325.679	29.7
AEPEKPGAC[+57.021464]PTINFEK(+2)	31.38	2	Positive	894.435	269.137	29.7
EKPGVC[+57.021464]PR(+2)	18.24	2	Positive	471.744	531.271	17.1
EKPGVC[+57.021464]PR(+2)	18.24	2	Positive	471.744	432.202	17.1
EKPGVC[+57.021464]PR(+2)	18.24	2	Positive	471.744	343.176	17.1
EKPGVC[+57.021464]PR(+2)	18.24	2	Positive	471.744	294.65	17.1
EKPGVC[+57.021464]PR(+2)	18.24	2	Positive	471.744	266.139	17.1
EKPGVC[+57.021464]PR(+2)	18.24	2	Positive	471.744	216.605	17.1
VKPLTFAR(+2)	20.77	2	Positive	466.289	494.272	16.9
VKPLTFAR(+2)	20.77	2	Positive	466.289	393.224	16.9
VKPLTFAR(+2)	20.77	2	Positive	466.289	352.708	16.9
VKPLTFAR(+2)	20.77	2	Positive	466.289	304.182	16.9
VKPLTFAR(+2)	20.77	2	Positive	466.289	247.64	16.9
VKPLTFAR(+2)	20.77	2	Positive	466.289	197.116	16.9
FFLPVFLPDAEK(+2)	35.73	2	Positive	711.887	559.272	24.3
FFLPVFLPDAEK(+2)	35.73	2	Positive	711.887	462.219	24.3
FFLPVFLPDAEK(+2)	35.73	2	Positive	711.887	347.193	24.3
FFLPVFLPDAEK(+2)	35.73	2	Positive	711.887	231.613	24.3
ELFDTGLK(+2)	28.47	2	Positive	461.747	533.293	16.8
ELFDTGLK(+2)	28.47	2	Positive	461.747	418.266	16.8
ELFDTGLK(+2)	28.47	2	Positive	461.747	317.218	16.8
ELFDTGLK(+2)	28.47	2	Positive	461.747	267.15	16.8
ELFDTGLK(+2)	28.47	2	Positive	461.747	209.637	16.8
ELFDTGLK(+2)	28.47	2	Positive	461.747	159.113	16.8
GAGNQNSYIGFLDFK(+2)	28.19	2	Positive	815.896	669.361	27.4
GAGNQNSYIGFLDFK(+2)	28.19	2	Positive	815.896	522.292	27.4
GAGNQNSYIGFLDFK(+2)	28.19	2	Positive	815.896	409.208	27.4
GAGNQNSYIGFLDFK(+2)	28.19	2	Positive	815.896	335.184	27.4
GAGNQNSYIGFLDFK(+2)	28.19	2	Positive	815.896	261.65	27.4
GAGNQNSYIGFLDFK(+2)	28.19	2	Positive	815.896	205.108	27.4
HLGATGAGNR(+2)	22.87	2	Positive	477.249	474.242	17.2
HLGATGAGNR(+2)	22.87	2	Positive	477.249	417.22	17.2
HLGATGAGNR(+2)	22.87	2	Positive	477.249	346.183	17.2
HLGATGAGNR(+2)	22.87	2	Positive	477.249	237.625	17.2
HLGATGAGNR(+2)	22.87	2	Positive	477.249	209.114	17.2
HLGATGAGNR(+2)	22.87	2	Positive	477.249	173.595	17.2
GNSLFSEVEDK(+2)	22.4	2	Positive	612.79	619.293	21.3
GNSLFSEVEDK(+2)	22.4	2	Positive	612.79	490.251	21.3
GNSLFSEVEDK(+2)	22.4	2	Positive	612.79	391.182	21.3
GNSLFSEVEDK(+2)	22.4	2	Positive	612.79	310.15	21.3
GNSLFSEVEDK(+2)	22.4	2	Positive	612.79	245.629	21.3
GNSLFSEVEDK(+2)	22.4	2	Positive	612.79	196.095	21.3
EGELMDETYYTDLLK(+2)	14.08	2	Positive	910.418	488.308	30.2
EGELMDETYYTDLLK(+2)	14.08	2	Positive	910.418	373.281	30.2
EGELMDETYYTDLLK(+2)	14.08	2	Positive	910.418	295.181	30.2
EGELMDETYYTDLLK(+2)	14.08	2	Positive	910.418	244.658	30.2
EGELMDETYYTDLLK(+2)	14.08	2	Positive	910.418	187.144	30.2
LFGTEQALK(+2)	20.27	2	Positive	503.782	588.335	18
LFGTEQALK(+2)	20.27	2	Positive	503.782	459.293	18
LFGTEQALK(+2)	20.27	2	Positive	503.782	331.234	18
LFGTEQALK(+2)	20.27	2	Positive	503.782	294.671	18
YTPNEVNK(+2)	25.53	2	Positive	482.74	700.362	17.4
YTPNEVNK(+2)	25.53	2	Positive	482.74	360.224	17.4
YTPNEVNK(+2)	25.53	2	Positive	482.74	350.685	17.4
YTPNEVNK(+2)	25.53	2	Positive	482.74	302.158	17.4
YTPNEVNK(+2)	25.53	2	Positive	482.74	245.137	17.4
YTPNEVNK(+2)	25.53	2	Positive	482.74	180.616	17.4
SPVSDSNSK(+2)	20.55	2	Positive	460.719	833.4	16.7
SPVSDSNSK(+2)	20.55	2	Positive	460.719	550.247	16.7
SPVSDSNSK(+2)	20.55	2	Positive	460.719	435.22	16.7
SPVSDSNSK(+2)	20.55	2	Positive	460.719	417.204	16.7
SPVSDSNSK(+2)	20.55	2	Positive	460.719	174.598	16.7
NNILATQSPTALSIK(+2)	37.17	2	Positive	785.943	531.35	26.5
NNILATQSPTALSIK(+2)	37.17	2	Positive	785.943	347.229	26.5
NNILATQSPTALSIK(+2)	37.17	2	Positive	785.943	365.229	26.5
NNILATQSPTALSIK(+2)	37.17	2	Positive	785.943	266.179	26.5
NNILATQSPTALSIK(+2)	37.17	2	Positive	785.943	230.66	26.5
NNILATQSPTALSIK(+2)	37.17	2	Positive	785.943	174.118	26.5
EDSDDHSK(+2)	20.79	2	Positive	466.683	601.258	16.9
EDSDDHSK(+2)	20.79	2	Positive	466.683	486.231	16.9
EDSDDHSK(+2)	20.79	2	Positive	466.683	371.204	16.9
EDSDDHSK(+2)	20.79	2	Positive	466.683	301.132	16.9
EDSDDHSK(+2)	20.79	2	Positive	466.683	243.619	16.9
ELIFHLLAELLR(+2)	30.51	2	Positive	733.94	601.367	24.9
ELIFHLLAELLR(+2)	30.51	2	Positive	733.94	530.33	24.9
ELIFHLLAELLR(+2)	30.51	2	Positive	733.94	401.287	24.9
ELIFHLLAELLR(+2)	30.51	2	Positive	733.94	301.187	24.9
ELIFHLLAELLR(+2)	30.51	2	Positive	733.94	265.668	24.9
GLTLLLILR(+2)	29.13	2	Positive	506.349	627.455	18.1
GLTLLLILR(+2)	29.13	2	Positive	506.349	514.371	18.1
GLTLLLILR(+2)	29.13	2	Positive	506.349	401.287	18.1
GLTLLLILR(+2)	29.13	2	Positive	506.349	314.231	18.1
GLTLLLILR(+2)	29.13	2	Positive	506.349	257.689	18.1
GLTLLLILR(+2)	29.13	2	Positive	506.349	201.147	18.1
AC[+57.021464]NAHGGLFK(+2)	17.49	2	Positive	537.761	464.287	19
AC[+57.021464]NAHGGLFK(+2)	17.49	2	Positive	537.761	407.265	19
AC[+57.021464]NAHGGLFK(+2)	17.49	2	Positive	537.761	261.158	19
AC[+57.021464]NAHGGLFK(+2)	17.49	2	Positive	537.761	232.647	19
AC[+57.021464]NAHGGLFK(+2)	17.49	2	Positive	537.761	204.136	19
RPITKPPAK(+2)	20.22	2	Positive	504.321	851.535	18
RPITKPPAK(+2)	20.22	2	Positive	504.321	540.35	18
RPITKPPAK(+2)	20.22	2	Positive	504.321	412.255	18
RPITKPPAK(+2)	20.22	2	Positive	504.321	315.203	18
RPITKPPAK(+2)	20.22	2	Positive	504.321	426.271	18
RPITKPPAK(+2)	20.22	2	Positive	504.321	270.679	18
RPITKPPAK(+2)	20.22	2	Positive	504.321	206.631	18
RPITKPPAK(+2)	20.22	2	Positive	504.321	158.105	18
FTGEEVHGTSGSFR(+2)	37.35	2	Positive	755.849	553.273	25.6
FTGEEVHGTSGSFR(+2)	37.35	2	Positive	755.849	466.241	25.6
FTGEEVHGTSGSFR(+2)	37.35	2	Positive	755.849	409.219	25.6
FTGEEVHGTSGSFR(+2)	37.35	2	Positive	755.849	277.14	25.6
FTGEEVHGTSGSFR(+2)	37.35	2	Positive	755.849	233.624	25.6
FTGEEVHGTSGSFR(+2)	37.35	2	Positive	755.849	205.113	25.6
DGGPDTAHVPPYPMK(+2)	32.61	2	Positive	791.371	732.375	26.6
DGGPDTAHVPPYPMK(+2)	32.61	2	Positive	791.371	635.322	26.6
DGGPDTAHVPPYPMK(+2)	32.61	2	Positive	791.371	538.269	26.6
DGGPDTAHVPPYPMK(+2)	32.61	2	Positive	791.371	676.837	26.6
DGGPDTAHVPPYPMK(+2)	32.61	2	Positive	791.371	366.691	26.6
DGGPDTAHVPPYPMK(+2)	32.61	2	Positive	791.371	269.638	26.6
VC[+57.021464]FVGDGFTR(+2)	42.42	2	Positive	579.274	595.283	20.3
VC[+57.021464]FVGDGFTR(+2)	42.42	2	Positive	579.274	480.257	20.3
VC[+57.021464]FVGDGFTR(+2)	42.42	2	Positive	579.274	423.235	20.3
VC[+57.021464]FVGDGFTR(+2)	42.42	2	Positive	579.274	298.145	20.3
VC[+57.021464]FVGDGFTR(+2)	42.42	2	Positive	579.274	240.632	20.3
VC[+57.021464]FVGDGFTR(+2)	42.42	2	Positive	579.274	212.121	20.3
AHVTHPELK(+2)	28.19	2	Positive	516.285	623.351	18.4
AHVTHPELK(+2)	28.19	2	Positive	516.285	486.292	18.4
AHVTHPELK(+2)	28.19	2	Positive	516.285	389.239	18.4
AHVTHPELK(+2)	28.19	2	Positive	516.285	312.179	18.4
AHVTHPELK(+2)	28.19	2	Positive	516.285	243.65	18.4
AHVTHPELK(+2)	28.19	2	Positive	516.285	195.123	18.4
ATFC[+57.021464]LPILGVK(+2)	32.94	2	Positive	609.849	529.371	21.2
ATFC[+57.021464]LPILGVK(+2)	32.94	2	Positive	609.849	416.287	21.2
ATFC[+57.021464]LPILGVK(+2)	32.94	2	Positive	609.849	303.203	21.2
ATFC[+57.021464]LPILGVK(+2)	32.94	2	Positive	609.849	313.715	21.2
ATFC[+57.021464]LPILGVK(+2)	32.94	2	Positive	609.849	265.189	21.2
ATFC[+57.021464]LPILGVK(+2)	32.94	2	Positive	609.849	208.647	21.2
DSSLVVAYVC[+57.021464]K(+2)	21.02	2	Positive	620.815	640.312	21.5
DSSLVVAYVC[+57.021464]K(+2)	21.02	2	Positive	620.815	569.275	21.5
DSSLVVAYVC[+57.021464]K(+2)	21.02	2	Positive	620.815	320.66	21.5
DSSLVVAYVC[+57.021464]K(+2)	21.02	2	Positive	620.815	285.141	21.5
ASLHVPNVR(+2)	20.65	2	Positive	496.785	584.351	17.8
ASLHVPNVR(+2)	20.65	2	Positive	496.785	485.283	17.8
ASLHVPNVR(+2)	20.65	2	Positive	496.785	388.23	17.8
ASLHVPNVR(+2)	20.65	2	Positive	496.785	292.679	17.8
ASLHVPNVR(+2)	20.65	2	Positive	496.785	243.145	17.8
ASLHVPNVR(+2)	20.65	2	Positive	496.785	194.619	17.8
EQDDLNQEAATK(+2)	21.11	2	Positive	681.312	519.277	23.3
EQDDLNQEAATK(+2)	21.11	2	Positive	681.312	390.235	23.3
EQDDLNQEAATK(+2)	21.11	2	Positive	681.312	319.198	23.3
EQDDLNQEAATK(+2)	21.11	2	Positive	681.312	260.142	23.3
EQDDLNQEAATK(+2)	21.11	2	Positive	681.312	195.621	23.3
EQDDLNQEAATK(+2)	21.11	2	Positive	681.312	160.102	23.3
EADLPEVFAK(+2)	13.67	2	Positive	559.79	690.382	19.7
EADLPEVFAK(+2)	13.67	2	Positive	559.79	593.329	19.7
EADLPEVFAK(+2)	13.67	2	Positive	559.79	464.287	19.7
EADLPEVFAK(+2)	13.67	2	Positive	559.79	365.218	19.7
EADLPEVFAK(+2)	13.67	2	Positive	559.79	297.168	19.7
EADLPEVFAK(+2)	13.67	2	Positive	559.79	183.113	19.7
LNGTNGC[+57.021464]PQR(+2)	19.31	2	Positive	558.764	617.282	19.7
LNGTNGC[+57.021464]PQR(+2)	19.31	2	Positive	558.764	400.23	19.7
LNGTNGC[+57.021464]PQR(+2)	19.31	2	Positive	558.764	309.145	19.7
LNGTNGC[+57.021464]PQR(+2)	19.31	2	Positive	558.764	280.634	19.7
LC[+57.021464]KPPNDLR(+2)	17.99	2	Positive	556.797	614.326	19.6
LC[+57.021464]KPPNDLR(+2)	17.99	2	Positive	556.797	403.23	19.6
LC[+57.021464]KPPNDLR(+2)	17.99	2	Positive	556.797	356.193	19.6
LC[+57.021464]KPPNDLR(+2)	17.99	2	Positive	556.797	307.666	19.6
LC[+57.021464]KPPNDLR(+2)	17.99	2	Positive	556.797	202.119	19.6
QNQYPDINTR(+2)	20.6	2	Positive	624.802	715.373	21.6
QNQYPDINTR(+2)	20.6	2	Positive	624.802	618.321	21.6
QNQYPDINTR(+2)	20.6	2	Positive	624.802	503.294	21.6
QNQYPDINTR(+2)	20.6	2	Positive	624.802	390.21	21.6
QNQYPDINTR(+2)	20.6	2	Positive	624.802	309.664	21.6
GPSELDC[+57.021464]FR(+2)	14.44	2	Positive	540.742	597.245	19.1
GPSELDC[+57.021464]FR(+2)	14.44	2	Positive	540.742	512.232	19.1
GPSELDC[+57.021464]FR(+2)	14.44	2	Positive	540.742	355.668	19.1
GPSELDC[+57.021464]FR(+2)	14.44	2	Positive	540.742	299.126	19.1
GPSELDC[+57.021464]FR(+2)	14.44	2	Positive	540.742	241.613	19.1
YFGAC[+57.021464]PVIHIK(+2)	20	2	Positive	652.844	510.34	22.5
YFGAC[+57.021464]PVIHIK(+2)	20	2	Positive	652.844	397.256	22.5
YFGAC[+57.021464]PVIHIK(+2)	20	2	Positive	652.844	353.734	22.5
YFGAC[+57.021464]PVIHIK(+2)	20	2	Positive	652.844	255.674	22.5
YFGAC[+57.021464]PVIHIK(+2)	20	2	Positive	652.844	199.132	22.5
DVATLEPWLLR(+2)	31.42	2	Positive	656.866	684.419	22.6
DVATLEPWLLR(+2)	31.42	2	Positive	656.866	587.366	22.6
DVATLEPWLLR(+2)	31.42	2	Positive	656.866	401.287	22.6
DVATLEPWLLR(+2)	31.42	2	Positive	656.866	342.713	22.6
DVATLEPWLLR(+2)	31.42	2	Positive	656.866	294.187	22.6
DVATLEPWLLR(+2)	31.42	2	Positive	656.866	201.147	22.6
FNNMLEHQIPQLLR(+2)	32.21	2	Positive	876.964	626.398	29.2
FNNMLEHQIPQLLR(+2)	32.21	2	Positive	876.964	529.346	29.2
FNNMLEHQIPQLLR(+2)	32.21	2	Positive	876.964	401.287	29.2
FNNMLEHQIPQLLR(+2)	32.21	2	Positive	876.964	313.703	29.2
EHSQEYLAR(+2)	28.91	2	Positive	566.772	651.346	19.9
EHSQEYLAR(+2)	28.91	2	Positive	566.772	522.303	19.9
EHSQEYLAR(+2)	28.91	2	Positive	566.772	359.24	19.9
EHSQEYLAR(+2)	28.91	2	Positive	566.772	326.177	19.9
EHSQEYLAR(+2)	28.91	2	Positive	566.772	261.655	19.9
DANHDQEGK(+2)	24.25	2	Positive	507.217	461.235	18.1
DANHDQEGK(+2)	24.25	2	Positive	507.217	333.177	18.1
DANHDQEGK(+2)	24.25	2	Positive	507.217	231.121	18.1
DANHDQEGK(+2)	24.25	2	Positive	507.217	167.092	18.1
FIMSSSC[+57.021464]ER(+2)	19.3	2	Positive	558.744	638.256	19.7
FIMSSSC[+57.021464]ER(+2)	19.3	2	Positive	558.744	551.224	19.7
FIMSSSC[+57.021464]ER(+2)	19.3	2	Positive	558.744	464.192	19.7
FIMSSSC[+57.021464]ER(+2)	19.3	2	Positive	558.744	319.632	19.7
FIMSSSC[+57.021464]ER(+2)	19.3	2	Positive	558.744	276.116	19.7
FIMSSSC[+57.021464]ER(+2)	19.3	2	Positive	558.744	232.6	19.7
VASPLAAK(+2)	9.86	2	Positive	378.734	499.324	14.3
VASPLAAK(+2)	9.86	2	Positive	378.734	402.271	14.3
VASPLAAK(+2)	9.86	2	Positive	378.734	289.187	14.3
VASPLAAK(+2)	9.86	2	Positive	378.734	250.166	14.3
VASPLAAK(+2)	9.86	2	Positive	378.734	201.639	14.3
VASPLAAK(+2)	9.86	2	Positive	378.734	145.097	14.3
AEPSFEETIFK(+2)	24.95	2	Positive	649.319	1097.55	22.4
AEPSFEETIFK(+2)	24.95	2	Positive	649.319	637.356	22.4
AEPSFEETIFK(+2)	24.95	2	Positive	649.319	508.313	22.4
AEPSFEETIFK(+2)	24.95	2	Positive	649.319	549.279	22.4
AEPSFEETIFK(+2)	24.95	2	Positive	649.319	319.181	22.4
AEPSFEETIFK(+2)	24.95	2	Positive	649.319	254.66	22.4
VSAVPPDAVR(+2)	23.3	2	Positive	505.785	654.357	18.1
VSAVPPDAVR(+2)	23.3	2	Positive	505.785	557.304	18.1
VSAVPPDAVR(+2)	23.3	2	Positive	505.785	460.251	18.1
VSAVPPDAVR(+2)	23.3	2	Positive	505.785	327.682	18.1
VSAVPPDAVR(+2)	23.3	2	Positive	505.785	230.629	18.1
TQLGPDIK(+2)	23.3	2	Positive	436.247	529.298	16
TQLGPDIK(+2)	23.3	2	Positive	436.247	472.277	16
TQLGPDIK(+2)	23.3	2	Positive	436.247	375.224	16
TQLGPDIK(+2)	23.3	2	Positive	436.247	265.153	16
TQLGPDIK(+2)	23.3	2	Positive	436.247	236.642	16
TQLGPDIK(+2)	23.3	2	Positive	436.247	188.116	16
C[+57.021464]DFSQIHK(+2)	20.61	2	Positive	517.739	612.346	18.4
C[+57.021464]DFSQIHK(+2)	20.61	2	Positive	517.739	525.314	18.4
C[+57.021464]DFSQIHK(+2)	20.61	2	Positive	517.739	397.256	18.4
C[+57.021464]DFSQIHK(+2)	20.61	2	Positive	517.739	306.677	18.4
C[+57.021464]DFSQIHK(+2)	20.61	2	Positive	517.739	263.161	18.4
LEPPGLFR(+2)	25.87	2	Positive	464.766	589.346	16.8
LEPPGLFR(+2)	25.87	2	Positive	464.766	435.271	16.8
LEPPGLFR(+2)	25.87	2	Positive	464.766	343.703	16.8
LEPPGLFR(+2)	25.87	2	Positive	464.766	295.176	16.8
LEPPGLFR(+2)	25.87	2	Positive	464.766	246.65	16.8
VPEPPAGHQWK(+2)	18.6	2	Positive	623.322	461.251	21.6
VPEPPAGHQWK(+2)	18.6	2	Positive	623.322	460.74	21.6
VPEPPAGHQWK(+2)	18.6	2	Positive	623.322	412.214	21.6
VPEPPAGHQWK(+2)	18.6	2	Positive	623.322	328.169	21.6
VPEPPAGHQWK(+2)	18.6	2	Positive	623.322	231.129	21.6
GVAIYFIDK(+2)	21.63	2	Positive	513.286	522.292	18.3
GVAIYFIDK(+2)	21.63	2	Positive	513.286	375.224	18.3
GVAIYFIDK(+2)	21.63	2	Positive	513.286	343.181	18.3
GVAIYFIDK(+2)	21.63	2	Positive	513.286	188.116	18.3
ITTINLNK(+2)	28.15	2	Positive	458.776	601.367	16.7
ITTINLNK(+2)	28.15	2	Positive	458.776	488.283	16.7
ITTINLNK(+2)	28.15	2	Positive	458.776	374.24	16.7
ITTINLNK(+2)	28.15	2	Positive	458.776	244.645	16.7
ITTINLNK(+2)	28.15	2	Positive	458.776	187.624	16.7
TVNVPDVK(+2)	21.65	2	Positive	436.247	557.329	16
TVNVPDVK(+2)	21.65	2	Positive	436.247	361.208	16
TVNVPDVK(+2)	21.65	2	Positive	436.247	279.168	16
TVNVPDVK(+2)	21.65	2	Positive	436.247	229.634	16
TVNVPDVK(+2)	21.65	2	Positive	436.247	181.108	16
NMLAAPLMNGK(+2)	20.88	2	Positive	580.301	562.302	20.3
NMLAAPLMNGK(+2)	20.88	2	Positive	580.301	449.218	20.3
NMLAAPLMNGK(+2)	20.88	2	Positive	580.301	281.655	20.3
NMLAAPLMNGK(+2)	20.88	2	Positive	580.301	225.112	20.3
NMLAAPLMNGK(+2)	20.88	2	Positive	580.301	159.592	20.3
LGDVEPYK(+2)	28.47	2	Positive	460.739	407.229	16.7
LGDVEPYK(+2)	28.47	2	Positive	460.739	318.174	16.7
LGDVEPYK(+2)	28.47	2	Positive	460.739	268.639	16.7
LGDVEPYK(+2)	28.47	2	Positive	460.739	204.118	16.7
ATPDQVQEILNTK(+2)	37.65	2	Positive	728.885	588.372	24.8
ATPDQVQEILNTK(+2)	37.65	2	Positive	728.885	475.287	24.8
ATPDQVQEILNTK(+2)	37.65	2	Positive	728.885	362.203	24.8
ATPDQVQEILNTK(+2)	37.65	2	Positive	728.885	642.843	24.8
ATPDQVQEILNTK(+2)	37.65	2	Positive	728.885	294.689	24.8
ATPDQVQEILNTK(+2)	37.65	2	Positive	728.885	238.147	24.8
EITPMFDGLNNNR(+2)	27.33	2	Positive	760.861	403.205	25.7
EITPMFDGLNNNR(+2)	27.33	2	Positive	760.861	589.275	25.7
EITPMFDGLNNNR(+2)	27.33	2	Positive	760.861	315.67	25.7
EITPMFDGLNNNR(+2)	27.33	2	Positive	760.861	259.128	25.7
EITPMFDGLNNNR(+2)	27.33	2	Positive	760.861	202.106	25.7
VDAIENER(+2)	23.22	2	Positive	473.235	660.331	17.1
VDAIENER(+2)	23.22	2	Positive	473.235	547.247	17.1
VDAIENER(+2)	23.22	2	Positive	473.235	418.204	17.1
VDAIENER(+2)	23.22	2	Positive	473.235	330.669	17.1
VDAIENER(+2)	23.22	2	Positive	473.235	274.127	17.1
VDAIENER(+2)	23.22	2	Positive	473.235	209.606	17.1
AAGEDGGEGGK(+2)	25.14	2	Positive	474.206	447.22	17.1
AAGEDGGEGGK(+2)	25.14	2	Positive	474.206	390.198	17.1
AAGEDGGEGGK(+2)	25.14	2	Positive	474.206	261.156	17.1
AAGEDGGEGGK(+2)	25.14	2	Positive	474.206	224.114	17.1
AAGEDGGEGGK(+2)	25.14	2	Positive	474.206	195.603	17.1
AAGEDGGEGGK(+2)	25.14	2	Positive	474.206	131.082	17.1
DVVAVIMAVNK(+2)	19.94	2	Positive	579.831	431.261	20.3
DVVAVIMAVNK(+2)	19.94	2	Positive	579.831	360.224	20.3
DVVAVIMAVNK(+2)	19.94	2	Positive	579.831	281.655	20.3
DVVAVIMAVNK(+2)	19.94	2	Positive	579.831	216.134	20.3
DVVAVIMAVNK(+2)	19.94	2	Positive	579.831	180.616	20.3
FQVPQEVLVR(+2)	19.89	2	Positive	607.848	615.382	21.1
FQVPQEVLVR(+2)	19.89	2	Positive	607.848	387.271	21.1
FQVPQEVLVR(+2)	19.89	2	Positive	607.848	308.195	21.1
FQVPQEVLVR(+2)	19.89	2	Positive	607.848	243.674	21.1
GTNNLYQVK(+2)	22.42	2	Positive	518.774	537.303	18.5
GTNNLYQVK(+2)	22.42	2	Positive	518.774	374.24	18.5
GTNNLYQVK(+2)	22.42	2	Positive	518.774	325.697	18.5
GTNNLYQVK(+2)	22.42	2	Positive	518.774	269.155	18.5
GTNNLYQVK(+2)	22.42	2	Positive	518.774	187.624	18.5
NAANSNSTSGSGSGSK(+2)	24.06	2	Positive	713.313	435.22	24.3
NAANSNSTSGSGSGSK(+2)	24.06	2	Positive	713.313	378.198	24.3
NAANSNSTSGSGSGSK(+2)	24.06	2	Positive	713.313	218.114	24.3
NAANSNSTSGSGSGSK(+2)	24.06	2	Positive	713.313	189.603	24.3
NAANSNSTSGSGSGSK(+2)	24.06	2	Positive	713.313	146.087	24.3
SFSTFKPLSEAR(+2)	27.47	2	Positive	685.359	575.315	23.5
SFSTFKPLSEAR(+2)	27.47	2	Positive	685.359	462.231	23.5
SFSTFKPLSEAR(+2)	27.47	2	Positive	685.359	375.199	23.5
SFSTFKPLSEAR(+2)	27.47	2	Positive	685.359	336.687	23.5
SFSTFKPLSEAR(+2)	27.47	2	Positive	685.359	288.161	23.5
FEATDLHGVSR(+2)	28.57	2	Positive	616.306	555.3	21.4
FEATDLHGVSR(+2)	28.57	2	Positive	616.306	418.241	21.4
FEATDLHGVSR(+2)	28.57	2	Positive	616.306	361.219	21.4
FEATDLHGVSR(+2)	28.57	2	Positive	616.306	278.154	21.4
FEATDLHGVSR(+2)	28.57	2	Positive	616.306	181.113	21.4
SYLELTLSPK(+2)	25.41	2	Positive	575.821	444.282	20.2
SYLELTLSPK(+2)	25.41	2	Positive	575.821	273.168	20.2
SYLELTLSPK(+2)	25.41	2	Positive	575.821	222.644	20.2
SYLELTLSPK(+2)	25.41	2	Positive	575.821	166.102	20.2
LIC[+57.021464]DPC[+57.021464]TITGVPLR(+2)	31.02	2	Positive	807.92	385.256	27.1
LIC[+57.021464]DPC[+57.021464]TITGVPLR(+2)	31.02	2	Positive	807.92	557.308	27.1
LIC[+57.021464]DPC[+57.021464]TITGVPLR(+2)	31.02	2	Positive	807.92	271.176	27.1
LIC[+57.021464]DPC[+57.021464]TITGVPLR(+2)	31.02	2	Positive	807.92	242.666	27.1
GALGEPFVQYFIAMK(+2)	29.83	2	Positive	835.934	609.343	28
GALGEPFVQYFIAMK(+2)	29.83	2	Positive	835.934	462.274	28
GALGEPFVQYFIAMK(+2)	29.83	2	Positive	835.934	349.19	28
GALGEPFVQYFIAMK(+2)	29.83	2	Positive	835.934	622.331	28
GALGEPFVQYFIAMK(+2)	29.83	2	Positive	835.934	175.099	28
SFDQNDDGTLDFK(+2)	24.9	2	Positive	751.325	623.34	25.4
SFDQNDDGTLDFK(+2)	24.9	2	Positive	751.325	522.292	25.4
SFDQNDDGTLDFK(+2)	24.9	2	Positive	751.325	409.208	25.4
SFDQNDDGTLDFK(+2)	24.9	2	Positive	751.325	312.174	25.4
SFDQNDDGTLDFK(+2)	24.9	2	Positive	751.325	261.65	25.4
SFDQNDDGTLDFK(+2)	24.9	2	Positive	751.325	205.108	25.4
SEVAEIC[+57.021464]QAIFK(+2)	23.9	2	Positive	697.852	606.361	23.8
SEVAEIC[+57.021464]QAIFK(+2)	23.9	2	Positive	697.852	478.302	23.8
SEVAEIC[+57.021464]QAIFK(+2)	23.9	2	Positive	697.852	407.265	23.8
SEVAEIC[+57.021464]QAIFK(+2)	23.9	2	Positive	697.852	303.684	23.8
SEVAEIC[+57.021464]QAIFK(+2)	23.9	2	Positive	697.852	239.655	23.8
SEVAEIC[+57.021464]QAIFK(+2)	23.9	2	Positive	697.852	204.136	23.8
SSSEPLEWAAH(+2)	27.39	2	Positive	607.277	823.41	21.1
SSSEPLEWAAH(+2)	27.39	2	Positive	607.277	613.273	21.1
SSSEPLEWAAH(+2)	27.39	2	Positive	607.277	484.23	21.1
SSSEPLEWAAH(+2)	27.39	2	Positive	607.277	298.151	21.1
SSSEPLEWAAH(+2)	27.39	2	Positive	607.277	307.14	21.1
SSSEPLEWAAH(+2)	27.39	2	Positive	607.277	242.619	21.1
LVDMEGER(+2)	25.07	2	Positive	474.726	621.266	17.1
LVDMEGER(+2)	25.07	2	Positive	474.726	490.226	17.1
LVDMEGER(+2)	25.07	2	Positive	474.726	361.183	17.1
LVDMEGER(+2)	25.07	2	Positive	474.726	311.137	17.1
GEC[+57.021464]EGNDTR(+2)	19.03	2	Positive	519.201	562.258	18.5
GEC[+57.021464]EGNDTR(+2)	19.03	2	Positive	519.201	505.237	18.5
GEC[+57.021464]EGNDTR(+2)	19.03	2	Positive	519.201	391.194	18.5
GEC[+57.021464]EGNDTR(+2)	19.03	2	Positive	519.201	253.122	18.5
GEC[+57.021464]EGNDTR(+2)	19.03	2	Positive	519.201	196.1	18.5
VIDEMNTK(+2)	25.35	2	Positive	475.236	493.244	17.2
VIDEMNTK(+2)	25.35	2	Positive	475.236	362.203	17.2
VIDEMNTK(+2)	25.35	2	Positive	475.236	247.126	17.2
VIDEMNTK(+2)	25.35	2	Positive	475.236	181.605	17.2
AAESLVEAR(+2)	23.29	2	Positive	473.253	587.351	17.1
AAESLVEAR(+2)	23.29	2	Positive	473.253	474.267	17.1
AAESLVEAR(+2)	23.29	2	Positive	473.253	375.199	17.1
AAESLVEAR(+2)	23.29	2	Positive	473.253	294.179	17.1
AAESLVEAR(+2)	23.29	2	Positive	473.253	237.637	17.1
EEALLDVMR(+2)	26.06	2	Positive	538.276	520.255	19.1
EEALLDVMR(+2)	26.06	2	Positive	538.276	405.228	19.1
EEALLDVMR(+2)	26.06	2	Positive	538.276	260.631	19.1
EEALLDVMR(+2)	26.06	2	Positive	538.276	203.118	19.1
ENLQLGTLNAESK(+2)	25.91	2	Positive	708.87	434.225	24.2
ENLQLGTLNAESK(+2)	25.91	2	Positive	708.87	363.187	24.2
ENLQLGTLNAESK(+2)	25.91	2	Positive	708.87	274.637	24.2
ENLQLGTLNAESK(+2)	25.91	2	Positive	708.87	217.616	24.2
ANLEEENR(+2)	21.1	2	Positive	487.73	547.247	17.5
ANLEEENR(+2)	21.1	2	Positive	487.73	418.204	17.5
ANLEEENR(+2)	21.1	2	Positive	487.73	338.648	17.5
ANLEEENR(+2)	21.1	2	Positive	487.73	209.606	17.5
TLTPEEMGSR(+2)	28.09	2	Positive	560.768	805.351	19.7
TLTPEEMGSR(+2)	28.09	2	Positive	560.768	579.256	19.7
TLTPEEMGSR(+2)	28.09	2	Positive	560.768	450.213	19.7
TLTPEEMGSR(+2)	28.09	2	Positive	560.768	319.172	19.7
TLTPEEMGSR(+2)	28.09	2	Positive	560.768	403.179	19.7
TLTPEEMGSR(+2)	28.09	2	Positive	560.768	290.131	19.7
TLTPEEMGSR(+2)	28.09	2	Positive	560.768	160.09	19.7
HYAMTFTESHIVVK(+2)	41.28	2	Positive	831.919	595.393	27.9
HYAMTFTESHIVVK(+2)	41.28	2	Positive	831.919	458.334	27.9
HYAMTFTESHIVVK(+2)	41.28	2	Positive	831.919	345.25	27.9
HYAMTFTESHIVVK(+2)	41.28	2	Positive	831.919	298.2	27.9
HYAMTFTESHIVVK(+2)	41.28	2	Positive	831.919	229.67	27.9
HYAMTFTESHIVVK(+2)	41.28	2	Positive	831.919	173.128	27.9
YGSTPSSQLK(+2)	21.27	2	Positive	534.272	475.287	18.9
YGSTPSSQLK(+2)	21.27	2	Positive	534.272	388.255	18.9
YGSTPSSQLK(+2)	21.27	2	Positive	534.272	330.19	18.9
YGSTPSSQLK(+2)	21.27	2	Positive	534.272	281.663	18.9
YGSTPSSQLK(+2)	21.27	2	Positive	534.272	238.147	18.9
YGSTPSSQLK(+2)	21.27	2	Positive	534.272	194.631	18.9
LGHMELNDK(+2)	17.1	2	Positive	528.76	618.309	18.8
LGHMELNDK(+2)	17.1	2	Positive	528.76	489.267	18.8
LGHMELNDK(+2)	17.1	2	Positive	528.76	376.183	18.8
LGHMELNDK(+2)	17.1	2	Positive	528.76	309.658	18.8
LGHMELNDK(+2)	17.1	2	Positive	528.76	245.137	18.8
EISLAC[+57.021464]PFFLK(+2)	38.08	2	Positive	662.852	651.386	22.8
EISLAC[+57.021464]PFFLK(+2)	38.08	2	Positive	662.852	554.334	22.8
EISLAC[+57.021464]PFFLK(+2)	38.08	2	Positive	662.852	407.265	22.8
EISLAC[+57.021464]PFFLK(+2)	38.08	2	Positive	662.852	326.197	22.8

## Sheet: ZP2-like isoform X2
Sequence	Raw intensity	Intensity	Organ	Peptide		RXN26748.1 zona pellucida sperm-binding 2-like isoform X2 [Labeo rohita]					HYAMTFTESHIVVK	YGSTPSSQLK	LGHMELNDK
HYAMTFTESHIVVK	1154.2	1.1542	Eye	P1		MGCFEIGALWVMVTIISIHADTSADGIQAECLGNRVQFILPGSLSAGSPLEVYAVNNTQTVLLTPHLAAQCGYTQKSDPWGNTIVSASLQSCFAENQVSVRNAIPEIKTAPVNQWPTVIPNLQLWKVLLYSPGEKAFDKETLQAMGYNVYSSPTRLVMRSPYNMAENFVQNVDGVDMMVFKSVVLFRDRWMMTIVESAAACPISGASVVGQMISWHVPRHISPLVSSEVEILEVHMGVNGRTLTPEEMGSRHYAMTFTESHIVVKIPIGAPDGYYKSYVLKDQYHVSYTIEPMLELLWKEGLDKTTYKVLFPITTPLTPWPLQVTDYTQPKQKVFDILLGYFLPDVELLNITFGSELLTVSEVLIKGIGLQEHSFPNDTKAFALQVPFSEPHVQIKSFR…				Replicate	Peak Area	Peak Area	Peak Area
YGSTPSSQLK	118841	118.841	Eye	P2						Eye	1154.2	118841	49723.4
LGHMELNDK	49723.4	49.7234	Eye	P3						FG	2.0776e+06	1.30533e+06	1.55881e+06
	2.0776e+06	2077.6	FG	P1						MG	2335.65	77856.2	36057.8
	1.30533e+06	1305.33	FG	P2
	1.55881e+06	1558.81	FG	P3
	2335.65	2.33565	MG	P1
	77856.2	77.8562	MG	P2
	36057.8	36.0578	MG	P3

## Sheet: WFDC3-like isoform X2
Sequence	Raw intensity	Intensity	Organ	Peptide		RXN20786.1 WAP four-disulfide core domain 3-like isoform X2 [Labeo rohita]						AQPEKPGVC[+57]R	AEPEKPGAC[+57]PTINFEK	EKPGVC[+57]PR
AQPEKPGVC[+57]R	24605.1	24.6051	Eye	P1		MNSASALQKEYAEPEKPGVCPTNDLGAATLGVCAEPCSLDSDCPNDEKCCSNGCGHQCISPSTYEKPGPCPKNLGIGLCVESCSHDDDCPNNQKCCSNGCGHECMAPYKAQPEKPGVCRIINVEEAMLGVCAEMCSHDGDCPNDQKCCSNGCGHECMAPYKAEPEKPGACPTINFEKAKLGVCAEMCSHDGDCPNDRKCCSNGCGHQCMAPYKEKPGVCPRRVIGVRLCEELCAHDTDCPDDEKCCSTKCGRECTPPFKVKLTD					Replicate	Peak Area	Peak Area	Peak Area
AEPEKPGAC[+57]PTINFEK	21593.7	21.5937	Eye	P2							Eye	24605.1	21593.7	54723.7
EKPGVC[+57]PR	54723.7	54.7237	Eye	P3							FG	682203	177938	506702
	682203	682.203	FG	P1							MG	59749.6	41537.2	43930.6
	177938	177.938	FG	P2
	506702	506.702	FG	P3
	59749.6	59.7496	MG	P1
	41537.2	41.5372	MG	P2
	43930.6	43.9306	MG	P3

## Sheet: Spindly isoform X1
Sequence	Raw intensity	Intensity	Organ	Peptide		RXN26779.1 Spindly isoform X1 [Labeo rohita]						LFGTEQALK	YTPNEVNK	SPVSDSNSK	NNILATQSPTALSIK	EDSDDHSK
LFGTEQALK	156068	156.068	Eye	P1		MSDLEDEIKVLRRKVQEGEEALQRAGQYGLQLLDDKMDLHNKLEEQRIEMSNVIEVLEQEKYSLQREAELKARMLESLRSEFDLVKNQQKHQMEQQQTLLERNHALELSDLKNKLEKIKTDLEEAQLAEKQMRHKLDLQSETLNSKTEELRVLTERANETMSSEILELQMQKIDMESAMKAREANQDLQIQLEQVLQQAQDPNSKGNSLFSEVEDKRAEMERQLNSMKRQHDSLQKQHALTKQHMHRMKMQIATLMQLQGNRADPAQLERLQFMLSDKNNEIESLMMKVRELEKEKMTVKDHHPPAPSKEGELMDETYYTDLLKMQLSNSKKDAEKLKDELSMARMKALSESQRVLELERKLFGTEQALKQRHSDNMRLQVKLEELKMKYTPNEVNKAQ…					Replicate	Peak Area	Peak Area	Peak Area	Peak Area	Peak Area
YTPNEVNK	15956.8	15.9568	Eye	P2							Eye	156068	15956.8	89677.9	3683.16	161051
SPVSDSNSK	89677.9	89.6779	Eye	P3							FG	672998	1.54967e+06	2.09118e+06	1.48672e+06	975495
NNILATQSPTALSIK	3683.16	3.68316	Eye	P4							MG	53577.3	75805.1	129743	8824.44	89719.6
EDSDDHSK	161051	161.051	Eye	P5
	672998	672.998	FG	P1
	1.54967e+06	1549.67	FG	P2
	2.09118e+06	2091.18	FG	P3
	1.48672e+06	1486.72	FG	P4
	975495	975.495	FG	P5
	53577.3	53.5773	MG	P1
	75805.1	75.8051	MG	P2
	129743	129.743	MG	P3
	8824.44	8.82444	MG	P4
	89719.6	89.7196	MG	P5

## Sheet: TDRD5-like protein
Sequence	Raw intensity	Intensity	Organ	Peptide		RXN20436.1 tudor domain-containing 5-like protein [Labeo rohita]					VASPLAAK	AEPSFEETIFK	VSAVPPDAVR	TQLGPDIK
VASPLAAK	63462.9	63.4629	Eye	P1		MTQDQLLTGLKKDVRSLLVSAKHGLTPEQLKKDYQTMLGFPMPLRLLGFRNVLDMVKEMPDVVHLDYHFDGSIILKVASPLAAKQKPVSPKSASLPEKSQQHLPSPPAVPKPEPVKAEPSFEETIFKLEEELRQQILEKGTAGTVSRELKDKLRKVVAENGNGISIHNLPTEYKRMYGEELPVSQYGFLSVTEMVGALSDTLSIQKGADESENQWMVVEFKPNDVQPAESESSPGHGTTSSLPNEPRNLSSKAHYFSCPESAWEREEVEQYSQESDTELRVTNKTIHQMVDLFPELVVSRVSAVPPDAVRCQKLKPPVLRRERELVPVLVEQTESPSHFYIRFCQNKEARALENMMIEMRSCYSYPDVTERYRLPDAYVRPGQVCCVAPRDMWFYRVVI…				Replicate	Peak Area	Peak Area	Peak Area	Peak Area
AEPSFEETIFK	34064.1	34.0641	Eye	P2						Eye	63462.9	34064.1	137438	38293.3
VSAVPPDAVR	137438	137.438	Eye	P3						FG	53062.6	17573.2	83124.6	77102.9
TQLGPDIK	38293.3	38.2933	Eye	P4						MG	1.97721e+06	716235	1.41294e+06	1450732
	53062.6	53.0626	FG	P1
	17573.2	17.5732	FG	P2
	83124.6	83.1246	FG	P3
	77102.9	77.1029	FG	P4
	1.97721e+06	1977.21	MG	P1
	716235	716.235	MG	P2
	1.41294e+06	1412.94	MG	P3
	1450732	1450.73	MG	P4

## Sheet: TOP1MT isoform X1 
Sequence	Raw intensity	Intensity	Organ	Peptide		RXN14883.1 DNA topoisomerase mitochondrial-like isoform X1 [Labeo rohita]					CDFSQIHK	LEPPGLFR	ITTINLNK
CDFSQIHK	84190.5	84.1905	Eye	P1		MKVFFMFREKKKSKHSSKDREKDSEPNGKHKPSSKTRSKSSKERHNHKEKSEQTADQELCDVDGNLQNESNGDSNQADEGHGCESEAAPKQEADEPQAAAPVKIKKKRVKDEKSPEKHDDKNQTSGKKRKKQTSEHDKAEKNKKIKKDGDEEDKKKKKGKKEDKKDEESDKWKWWEEGKLSDSQKWSSLEHKGPYFPPEYEPLPDNVCFYYDGQTVKLSPATEEIATFYAKMLDHEYTTKEVFQNNFFGDWREEMTKDERKLIKTLSKCDFSQIHKYFVEKSEERKNMTKEEKQVLKDEANRLMEEYGYCLLDGHREKIGNFKLEPPGLFRGRGEHPKMGKLKKRIQPEDVTINCSEDSKVPEPPAGHQWKRVQHDNTVTWLASWLENIHGRPKYIMLN…				Replicate	Peak Area	Peak Area	Peak Area
LEPPGLFR	66279	66.279	Eye	P2						Eye	84190.5	66279	13536.4
ITTINLNK	13536.4	13.5364	Eye	P3						FG	43397.2	384713	140919
	43397.2	43.3972	FG	P1						MG	1.44371e+06	6942824	5117319
	384713	384.713	FG	P2
	140919	140.919	FG	P3
	1.44371e+06	1443.71	MG	P1
	6942824	6942.82	MG	P2
	5117319	5117.32	MG	P3

## Sheet: YTHDC2 isoform X1
Sequence	Raw intensity	Intensity	Organ	Peptide		RXN23652.1 putative ATP-dependent RNA helicase YTHDC2 isoform X1 [Labeo rohita]					QNQYPDINTR	GPSELDCFR	YFGACPVIHIK	DVATLEPWLLR
QNQYPDINTR	51057.5	51.0575	Eye	P1		MFAEPAEAHGRESFSHIQRRVRRHRTIFTEEQLDALEDLFRQNQYPDINTREQLAQRTHLREERVEGEMSRGAQKSHTNPSKQTASIKAKGFKDIRIDEEVKIAVNIALERFQYSDDKELDFPSSLTNSERAFIHRLAQSLGYVSKSRGKGSSRYLTVRKKDGTEASRSIMTCNLSHNSKHMVQSLLQRFPITSKERGELQPRTERAVFTSPDASDSKSRTSGRLSHGISQVPQKRGPSELDCFRRALPVYERQEEIIQTIRENQVVLVLGETGSGKTTQIPQFLLDDCCRNGIPCRIFCTQPRRLATIAVAERVAAERGEKIGQTIGYQIRLESRVSPKTLLTFCTSGVLLRTLMAGDKAMSTVTHVIVDEVHERDGLTDFLLTKMKELVQKMPSLKL…				Replicate	Peak Area	Peak Area	Peak Area	Peak Area
GPSELDCFR	33726.5	33.7265	Eye	P2						Eye	51057.5	33726.5	37361.4	25370.3
YFGACPVIHIK	37361.4	37.3614	Eye	P3						FG	21436.2	24250.3	17672	62806.3
DVATLEPWLLR	25370.3	25.3703	Eye	P4						MG	383312	1.07436e+06	532328	1.24146e+06
	21436.2	21.4362	FG	P1
	24250.3	24.2503	FG	P2
	17672	17.672	FG	P3
	62806.3	62.8063	FG	P4
	383312	383.312	MG	P1
	1.07436e+06	1074.36	MG	P2
	532328	532.328	MG	P3
	1.24146e+06	1241.46	MG	P4

## Sheet: Cone-GNAT2
Sequence	Raw intensity	Intensity	Organ	Peptide		RXN12081.1 cone cGMP-specific 3, 5 -cyclic phosphodiesterase subunit alpha [Labeo rohita]					TVNVPDVK	NMLAAPLMNGK	LGDVEPYK	EITPMFDGLNNNR	AAGEDGGEGGK
TVNVPDVK	2144809	2144.81	Eye	P1		MADKDSVEKYLENNPQFAKEYFDKKVRCEAIAAAFAENLDIKDPASFKDVSQIQEASIIFDMIKEMHSQPIMEKAMHKVLQRICLLVNADRCSYFIYRARNGIPELATCLFDVTPSSKYDANVVNPQSEIVFPTDMGIVGYIASSKKTVNVPDVKQNPKFSDFVDKQTGYTTKNMLAAPLMNGKDPLGVVMAVNKVGGNEFSKGDEDLFSKYITFATVIALQHYTTYMYNVESRRSQVLLWSASKVFEELTDIERQFHKALYTVRNYLQCERYSVGLLDMTKEKEFYDEWPIKLGDVEPYKGPKTPDGREIIFYKIIDYLLEAKEEIKVIPTPPVDHWALVSGLPSYVAENGFICNMMNVAADEYFTFQKEAVDELGFVIKNVLSLPIVNKKEEIVGVA…				Replicate	Peak Area	Peak Area	Peak Area	Peak Area	Peak Area
NMLAAPLMNGK	3272080	3272.08	Eye	P2						Eye	2144809	3272080	954073	956383	1.27345e+06
LGDVEPYK	954073	954.073	Eye	P3						FG	32483.4	38534.4	127811	161114	35414.4
EITPMFDGLNNNR	956383	956.383	Eye	P4						MG	64754.2	122992	136577	40650	54370.3
AAGEDGGEGGK	1.27345e+06	1273.45	Eye	P5
	32483.4	32.4834	FG	P1
	38534.4	38.5344	FG	P2
	127811	127.811	FG	P3
	161114	161.114	FG	P4
	35414.4	35.4144	FG	P5
	64754.2	64.7542	MG	P1
	122992	122.992	MG	P2
	136577	136.577	MG	P3
	40650	40.65	MG	P4
	54370.3	54.3703	MG	P5

[truncated: 7 more sheets: Girdin-like isoform X1, Lengsin-like isoform X2, CCDC127, HECTD4 isoform X2, GLT8D1  isoform X1, visinin-like protein, GNAT1]
