# Supplementary material for: The Proteome Map and PeptideAtlas of a widely cultivated tropical water fish Labeo rohita: A resource for the Aquaculture Community
Source: Research Square preprint supplement (doi:10.21203/rs.3.rs-397364/v1), 2021-04-12
Supplement: Supplementary file 1 [file 67655ad8eafc6e0dceba3f8d.pdf]

Supplementary Figure S1

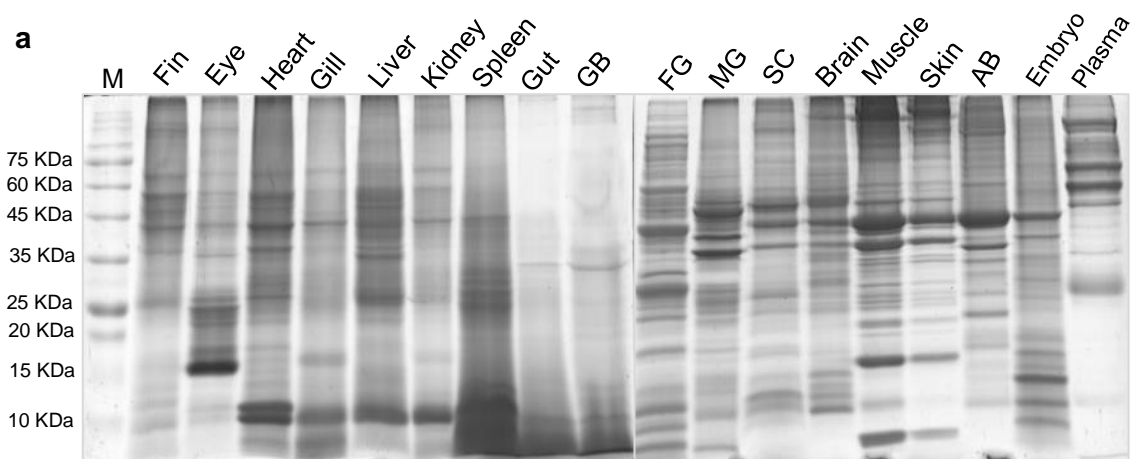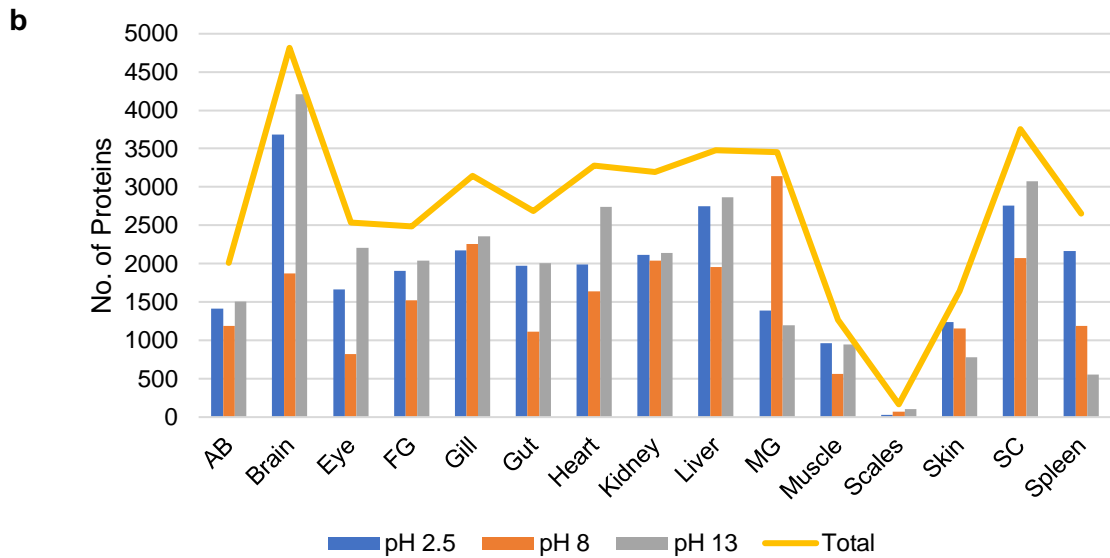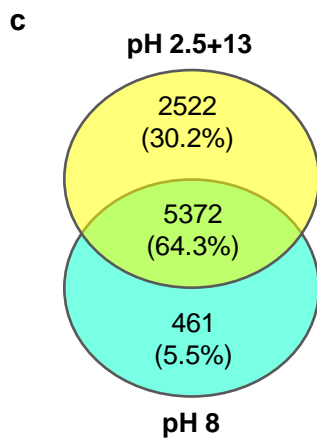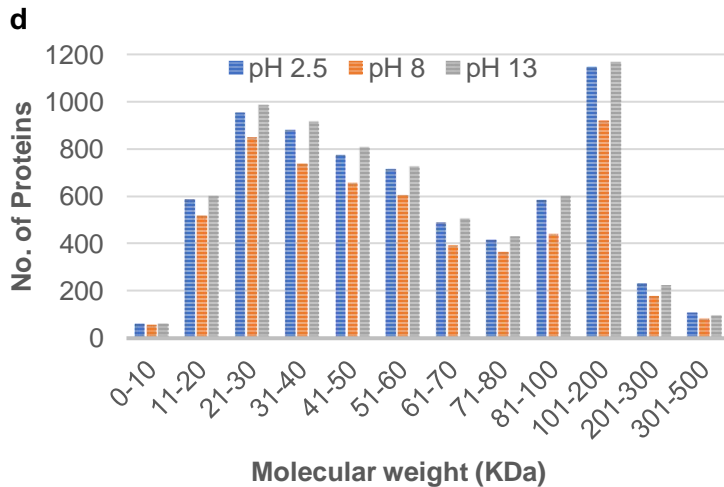

Supplementary Figure S2

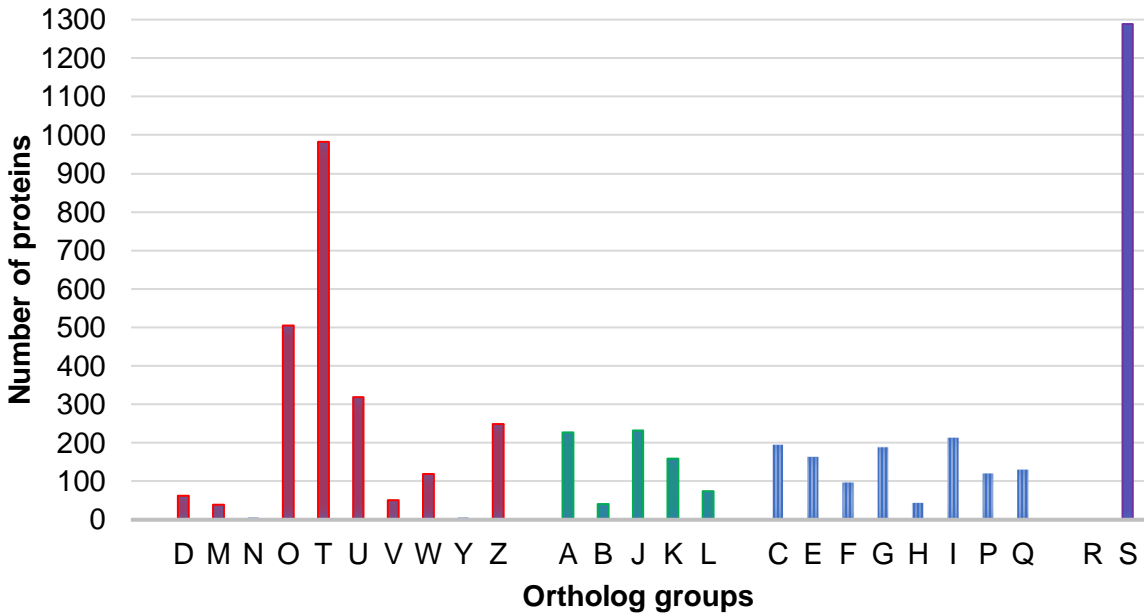

↓

| Groups                                    | Description                                                       | No. of proteins |
|-------------------------------------------|-------------------------------------------------------------------|-----------------|
| <b>CELLULAR PROCESSES AND SIGNALING</b>   |                                                                   |                 |
| D                                         | Cell cycle control, cell division, chromosome partitioning        | 62              |
| M                                         | Cell wall/membrane/envelope biogenesis                            | 38              |
| N                                         | Cell motility                                                     | 5               |
| O                                         | Post-translational modification, protein turnover, and chaperones | 505             |
| T                                         | Signal transduction mechanisms                                    | 982             |
| U                                         | Intracellular trafficking, secretion, and vesicular transport     | 318             |
| V                                         | Defense mechanisms                                                | 50              |
| W                                         | Extracellular structures                                          | 119             |
| Y                                         | Nuclear structure                                                 | 4               |
| Z                                         | Cytoskeleton                                                      | 249             |
| <b>INFORMATION STORAGE AND PROCESSING</b> |                                                                   |                 |
| A                                         | RNA processing and modification                                   | 226             |
| B                                         | Chromatin structure and dynamics                                  | 40              |
| J                                         | Translation, ribosomal structure and biogenesis                   | 232             |
| K                                         | Transcription                                                     | 158             |
| L                                         | Replication, recombination and repair                             | 74              |
| <b>METABOLISM</b>                         |                                                                   |                 |
| C                                         | Energy production and conversion                                  | 195             |
| E                                         | Amino acid transport and metabolism                               | 163             |
| F                                         | Nucleotide transport and metabolism                               | 96              |
| G                                         | Carbohydrate transport and metabolism                             | 187             |
| H                                         | Coenzyme transport and metabolism                                 | 43              |
| I                                         | Lipid transport and metabolism                                    | 213             |
| P                                         | Inorganic ion transport and metabolism                            | 120             |
| Q                                         | Secondary metabolites biosynthesis, transport, and catabolism     | 129             |
| <b>POORLY CHARACTERIZED</b>               |                                                                   |                 |
| R                                         | General function prediction only                                  | 0               |
| S                                         | Function unknown                                                  | 1289            |

Supplementary Figure S3

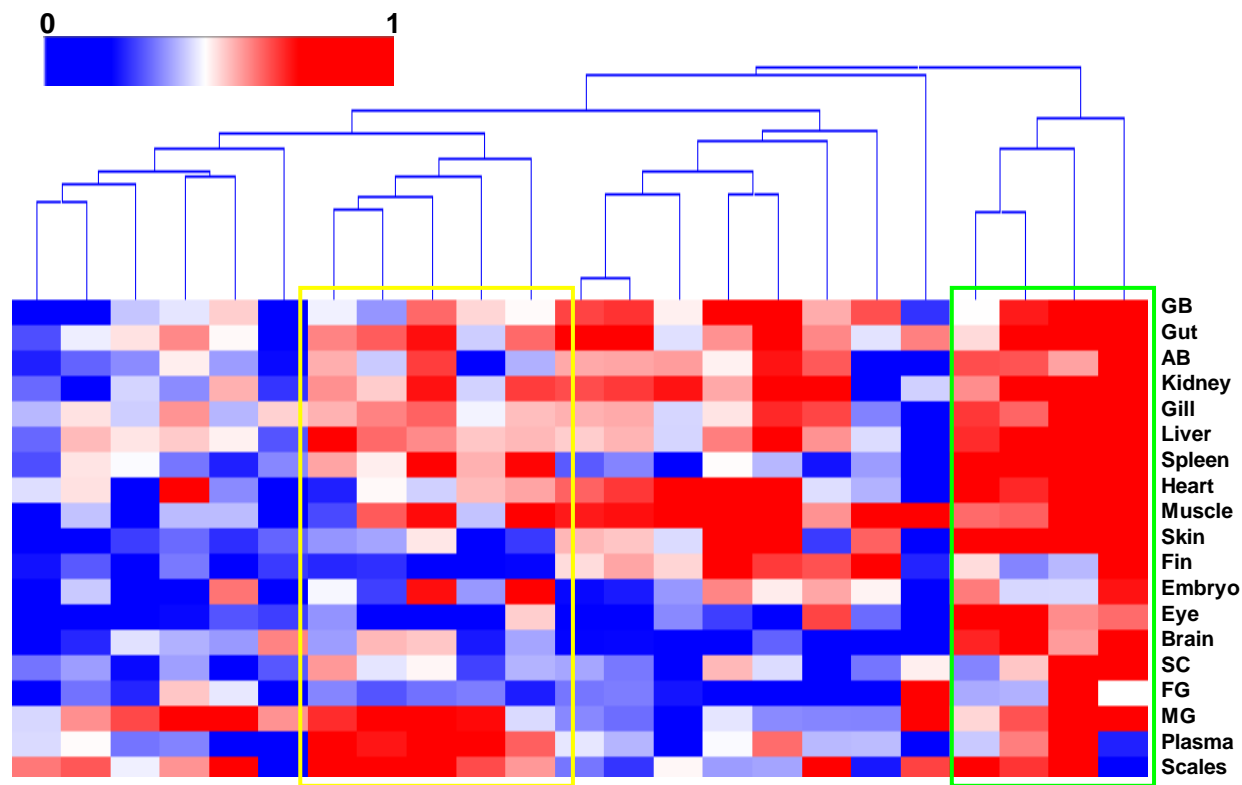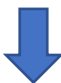

| NCBI ID    | Uniprot ID | Protein name                           | Category/Function                          |
|------------|------------|----------------------------------------|--------------------------------------------|
| RXN10923.1 | A0A498LTI4 | Heat shock cognate 71 kDa              | Protein folding                            |
| RXN17745.1 | A0A498MKB6 | L-lactate dehydrogenase (EC 1.1.1.27)  | Oxidoreductase/Cell respiration            |
| RXN31887.1 | A0A498NJQ6 | ATP synthase subunit beta (EC 7.1.2.2) | Nucleotide binding/ATP synthesis           |
| RXN29259.1 | A0A498N4E9 | Tubulin Beta-4B Chain                  | Cytoskeletal element                       |
| RXN08459.1 | A0A498LJB6 | Beta-enolase                           | Metal binding/Cell respiration             |
| RXN39545.1 | A0A498LRW2 | Apolipo A-I                            | Lipid metabolism                           |
| RXN27874.1 | A0A498N853 | Transferrin variant C                  | Metal binding glycoproteins/Iron transport |
| RXN16130.1 | A0A498M6I9 | Cytoplasmic 1                          | Cytoplasmic cytoskeleton                   |
| RXN22752.1 | A0A498MT06 | Hemoglobin Subunit Beta-Like Protein   | Gaseous transport/cell respiration         |

Supplementary Figure S4

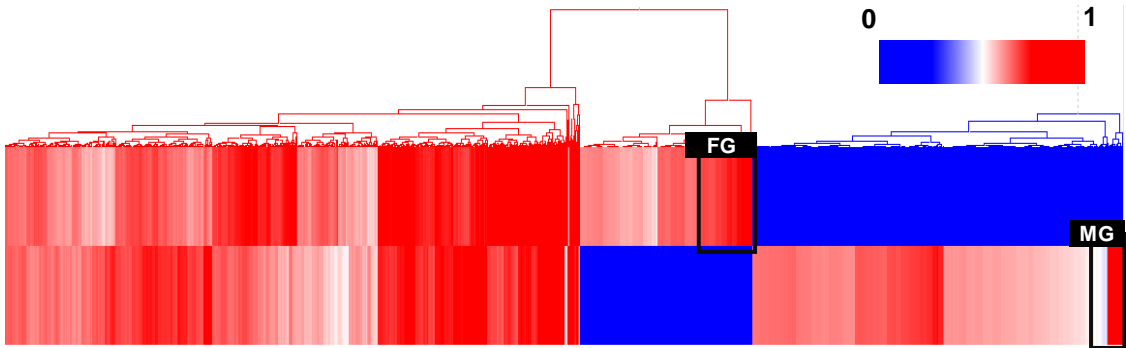

**FG- Female gonad**

|            |            |                       |
|------------|------------|-----------------------|
| RXN20786.1 | A0A498MQD4 | WFDC3-like isoform X2 |
| RXN06915.1 | A0A498LNH2 | GLT8D1 isoform X1     |
| RXN15248.1 | A0A498M321 | MCM3-like isoform X1  |
| RXN26779.1 | A0A498MXN1 | Spindly isoform X1    |
| RXN26748.1 | A0A498MXT9 | ZP2-like isoform X2   |
| RXN06747.1 | A0A498LMG9 | ZP3-Like Protein      |

**MG- Male gonad**

|            |            |                    |
|------------|------------|--------------------|
| RXN09507.1 | A0A498M4Z4 | ELAC2              |
| RXN11994.1 | A0A498LYP6 | Box C D snoRNA1    |
| RXN14883.1 | A0A498M4T4 | TOP1MT isoform X1  |
| RXN20436.1 | A0A498MP71 | TDRD5-like protein |
| RXN22339.1 | A0A498MLP7 | KBTBD8             |
| RXN17568.1 | A0A498M970 | RNA Helicase Tdrd9 |

Supplementary Figure S5

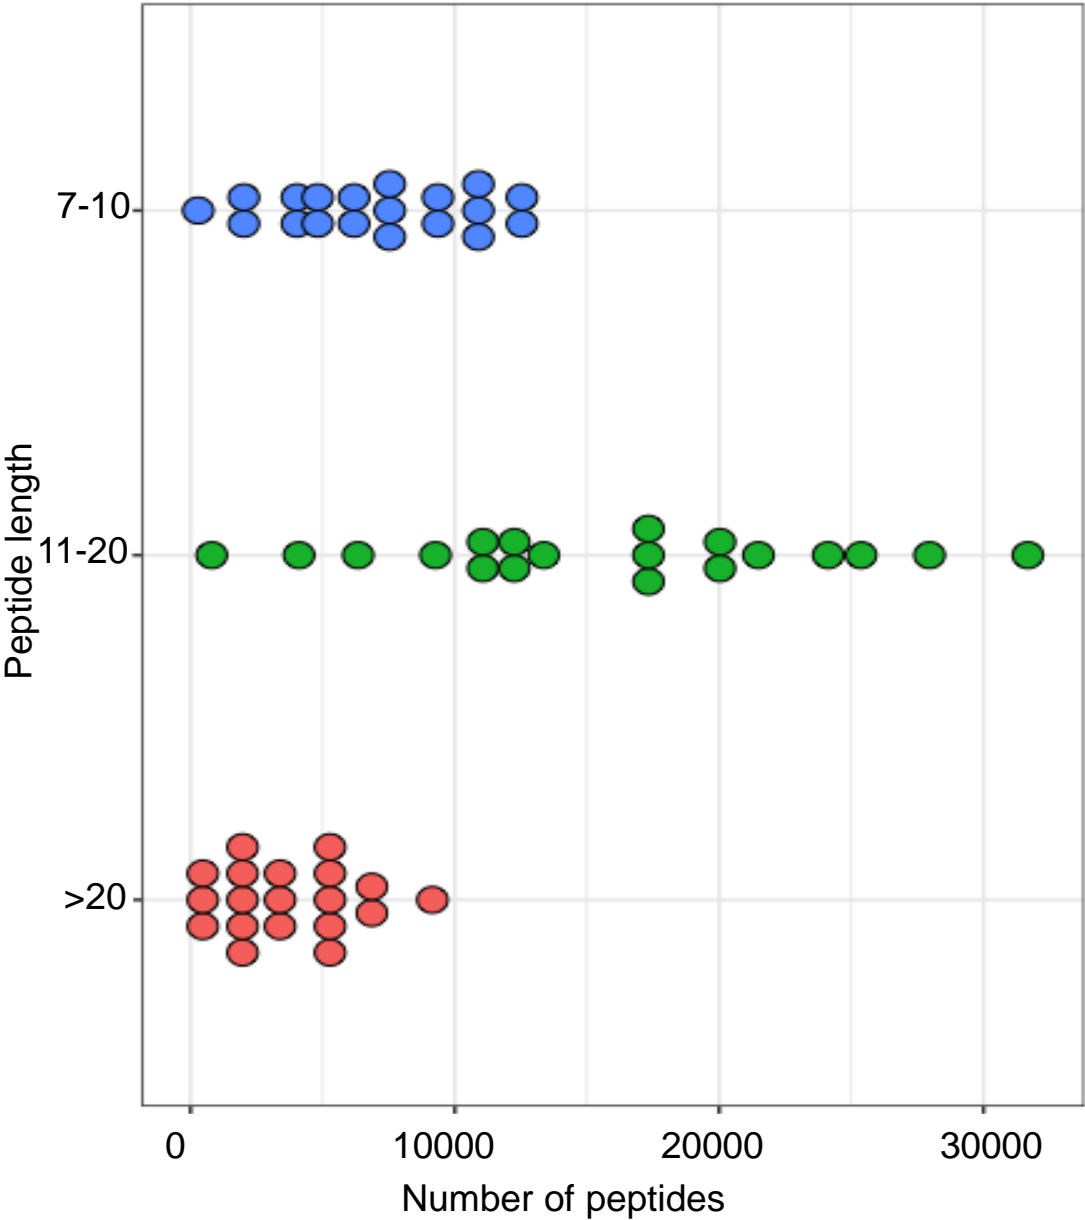

DGAS[167]PTGQVN<sup>+</sup>ITVL<sup>+</sup>LLDK<sup>+</sup> - Protein A0A498NNQ1, S69

**a**

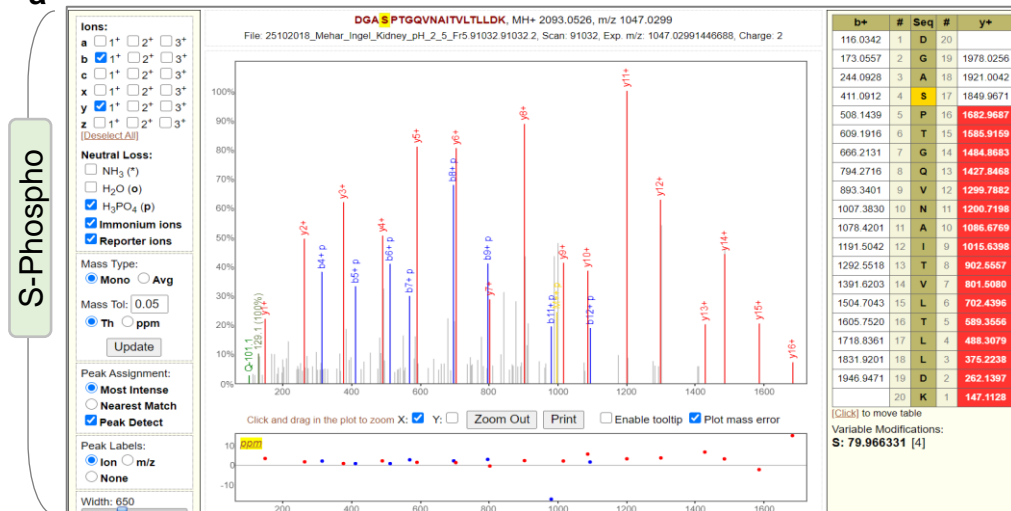

b

AVGK[142]VIPELN[115]GK<sup>+2</sup> - Protein A0A498L4F1, K233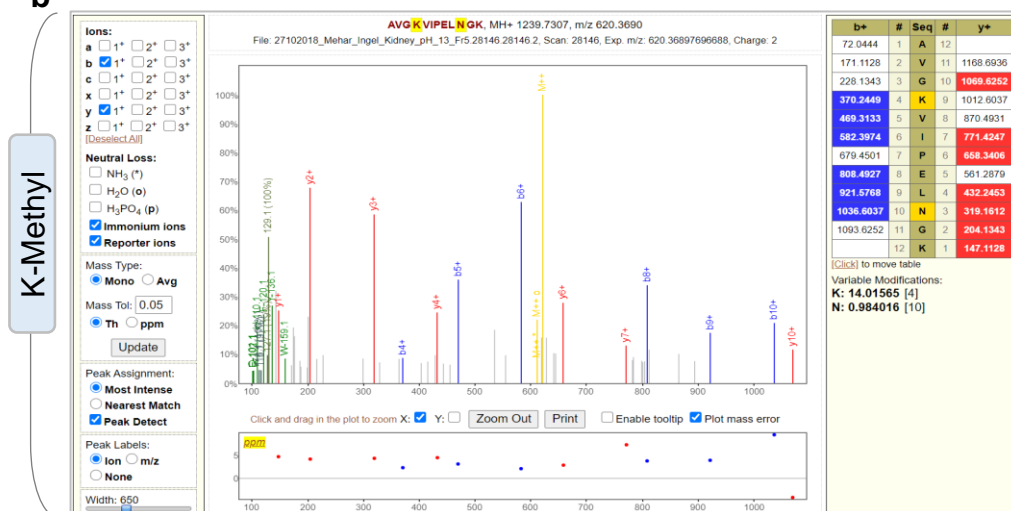

C

AVELAAAN[115]TK[170]GIC[160]FIR<sup>+2</sup> – Protein A0A498L5H4, K468

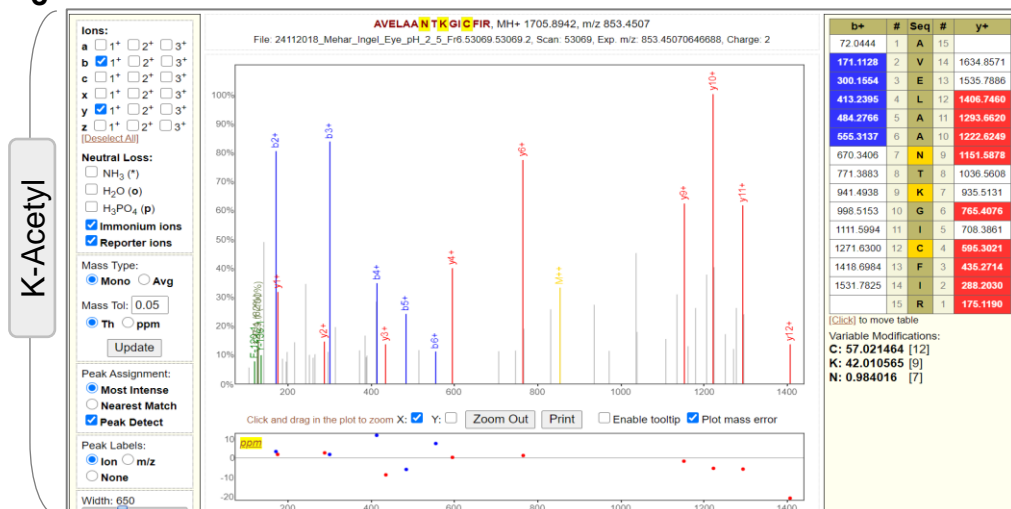

## Supplementary Figure S7

### Protein 1 –ZP2-like isoform X2- High in Female gonad

RXN26748.1 A0A498MXT9

#### Peptide 1: R.HYAMTFTESHIVVK.I [251, 264]

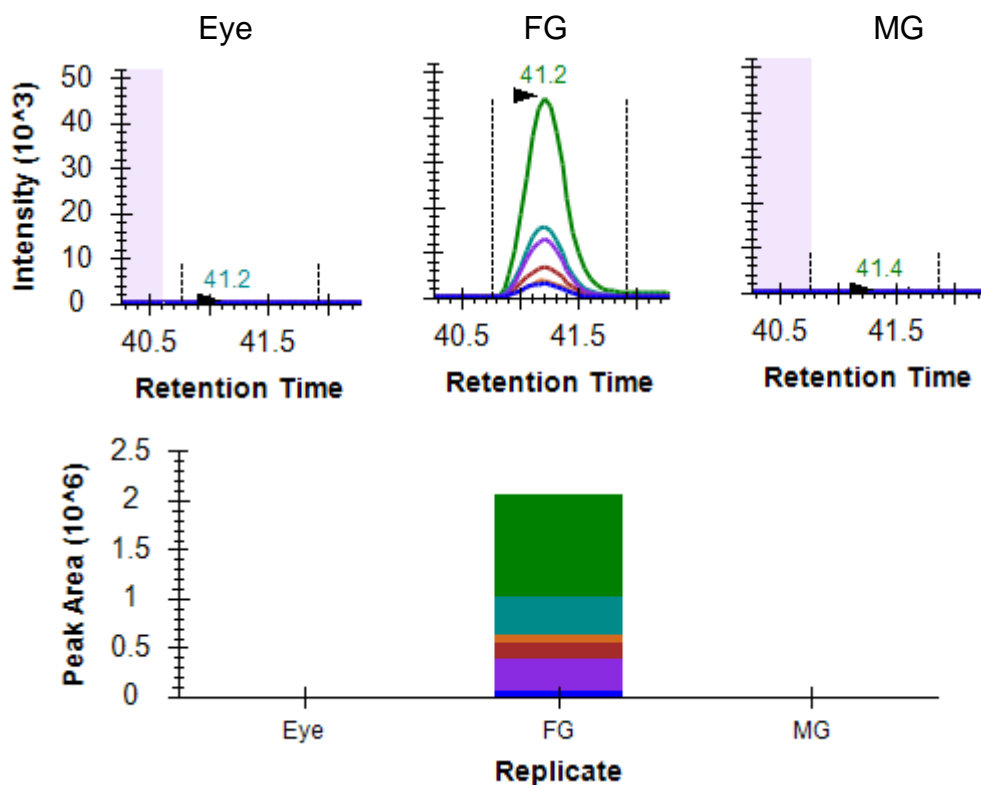

#### Peptide 2: K.YGSTPSSQLK.I [454, 463]

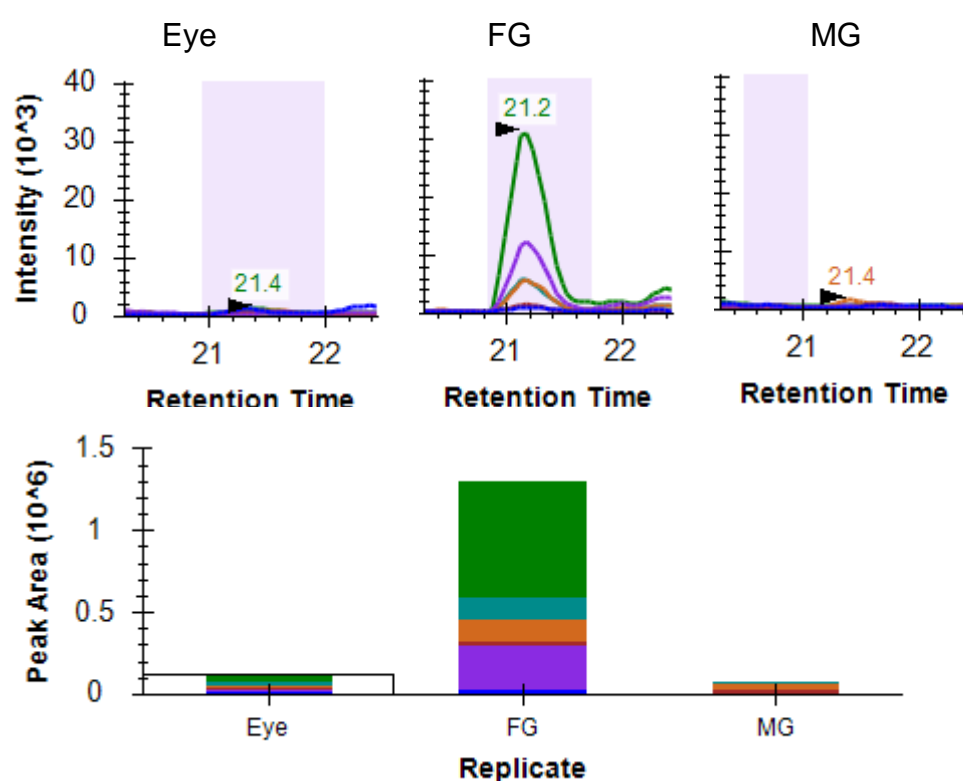

Supplementary Figure S8

Protein 1 –ZP2-like isoform X2- High in Female gonad

RXN26748.1 A0A498MXT9

Peptide 3: K.LGHMELNDK.I [466, 474]

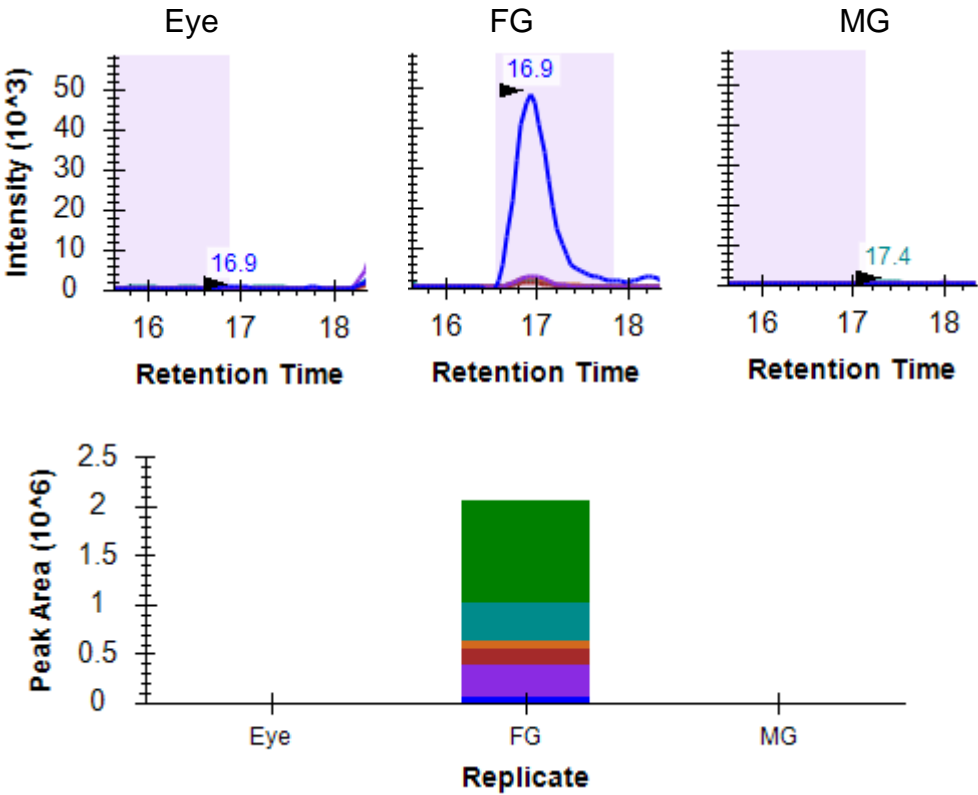



## Supplementary Figure S9

### Protein 2 –TDRD5-like protein- High in Male gonad

RXN20436.1 A0A498MP71

#### Peptide 1: K.VASPLAAK.Q [76, 83]

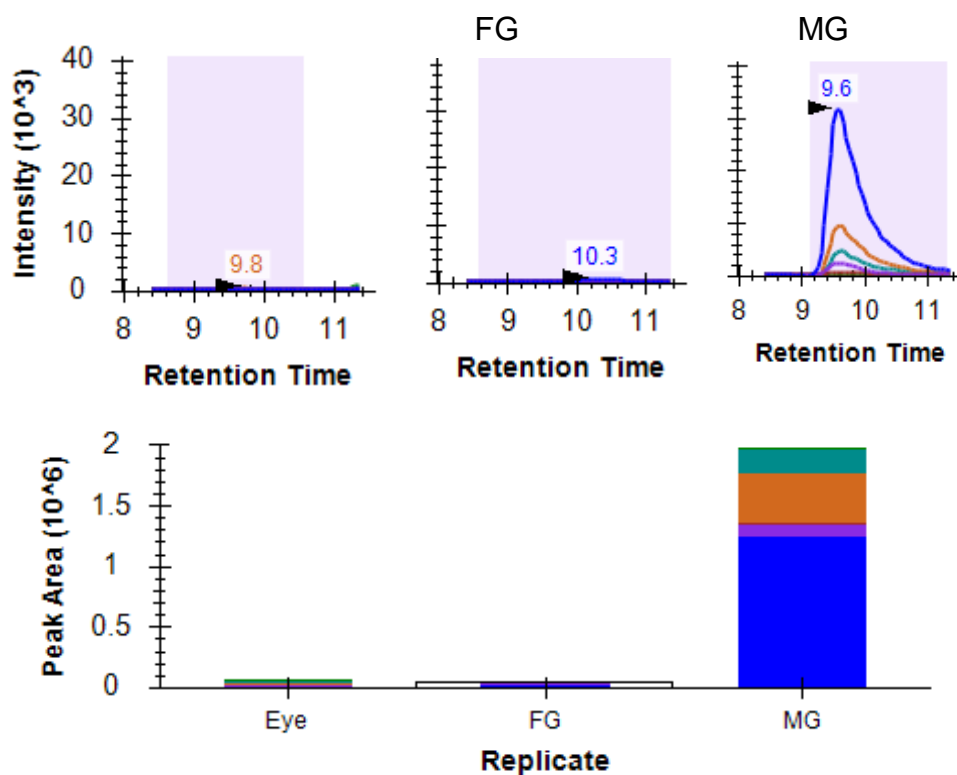

#### Peptide 2: K.AEPSFEETIFK.L [116, 126]

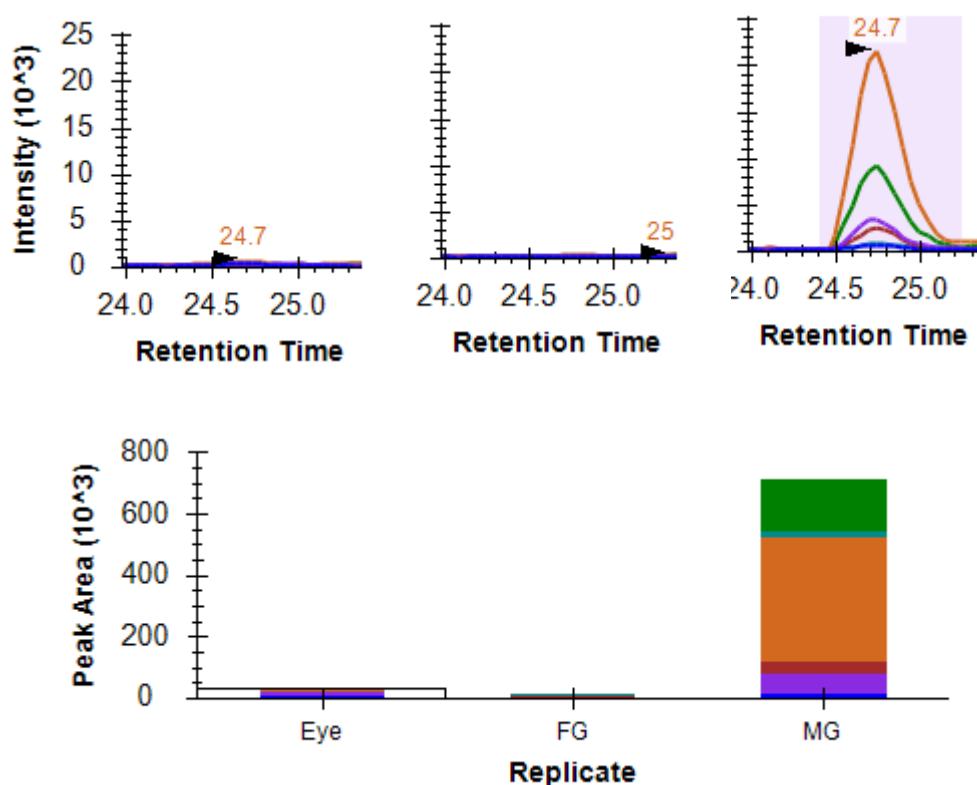

## Supplementary Figure S10

### Protein 2 –TDRD5-like protein- High in Male gonad

RXN20436.1 A0A498MP71

#### Peptide 3: R.VSAVPPDAVR.C [300, 309]

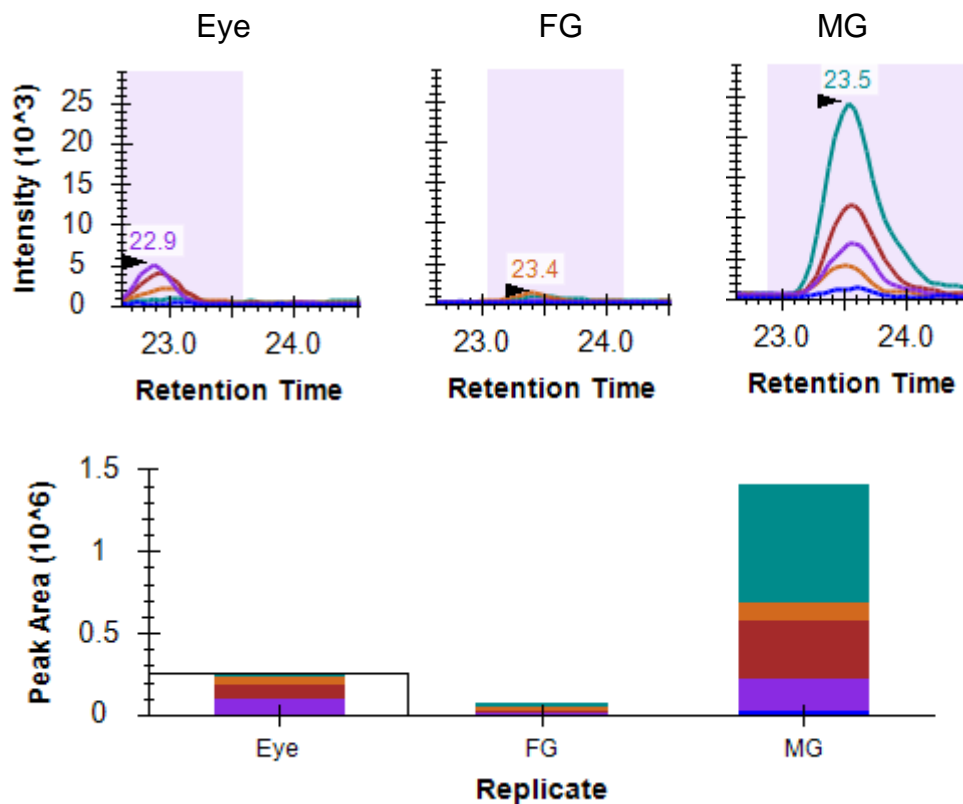

#### Peptide 4: K.TQLGPDIK.T [637, 644]

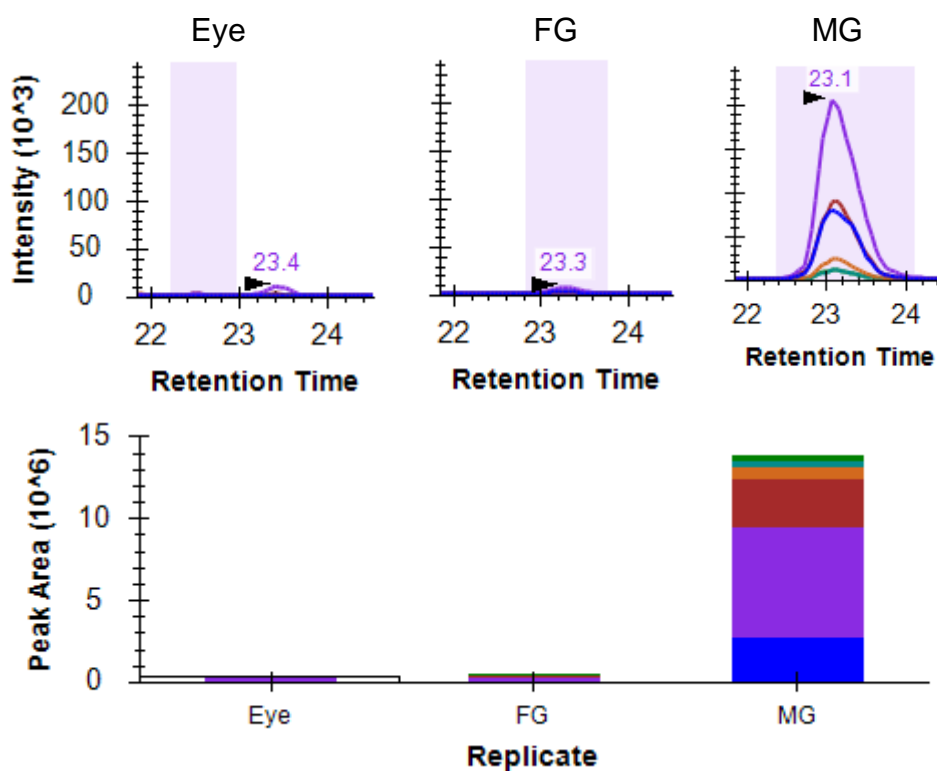

## Supplementary Figure S11

### Protein 3 –Cone GNAT2 - High in Eye

RXN12081.1 A0A498LV54

#### Peptide 1: K.TVNVPDVK.Q [147, 154]

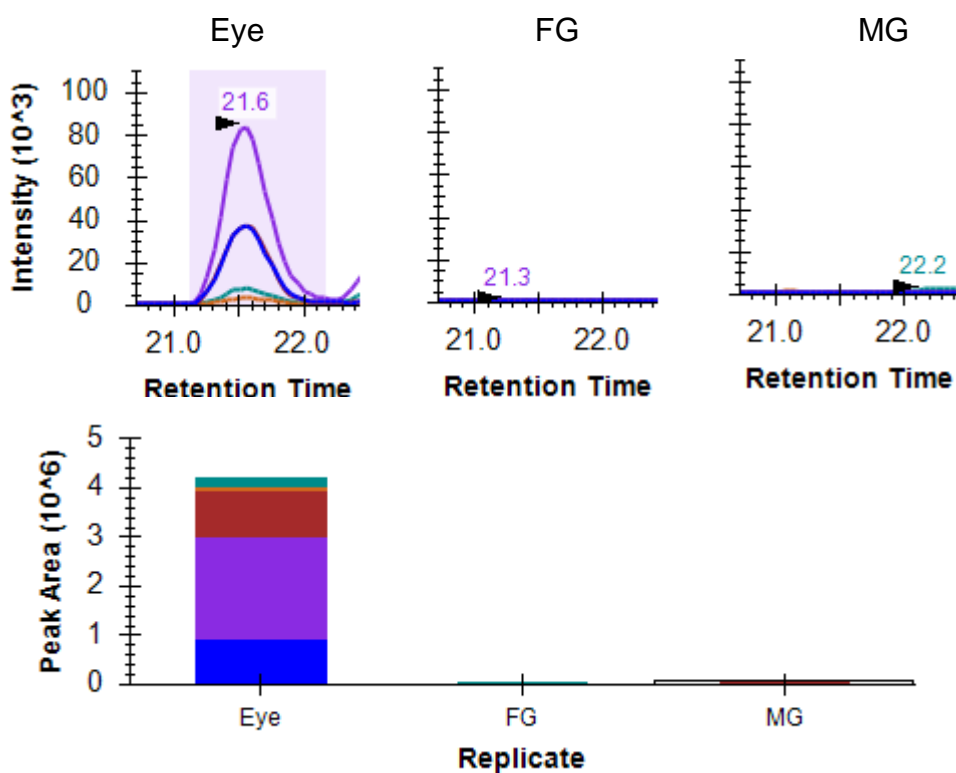

#### Peptide 2: K.NMLAAPLMNGK.D [173, 183]

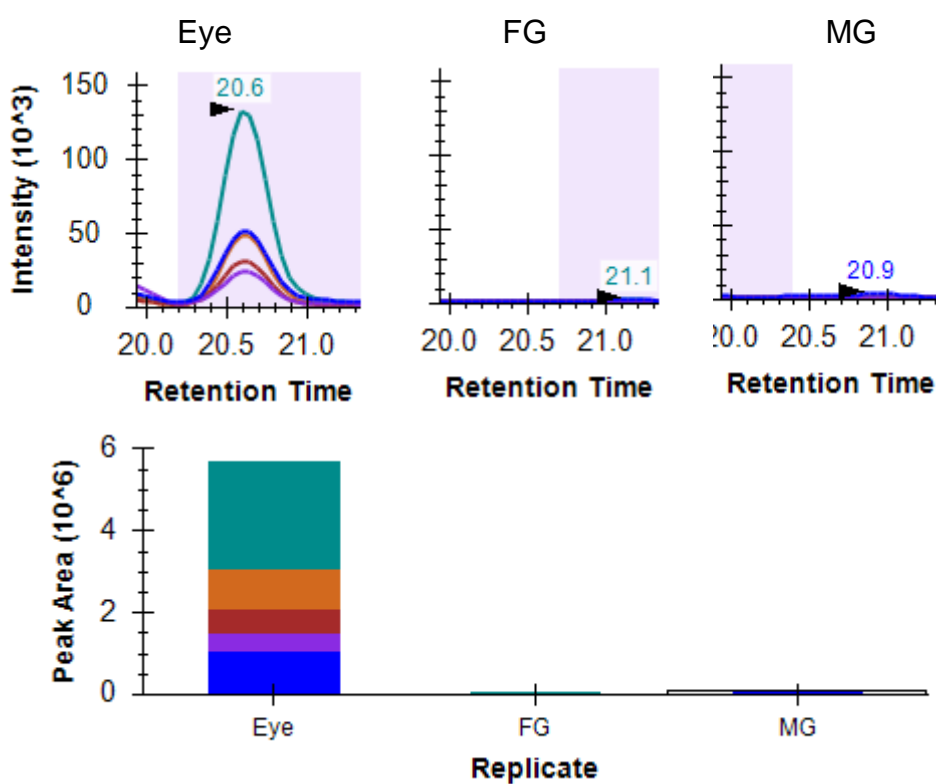

## Supplementary Figure S12

### Protein 3 –Cone GNAT2 - High in Eye

RXN12081.1 A0A498LV54

#### Peptide 3: K.LGDVEPYK.G [293, 300]

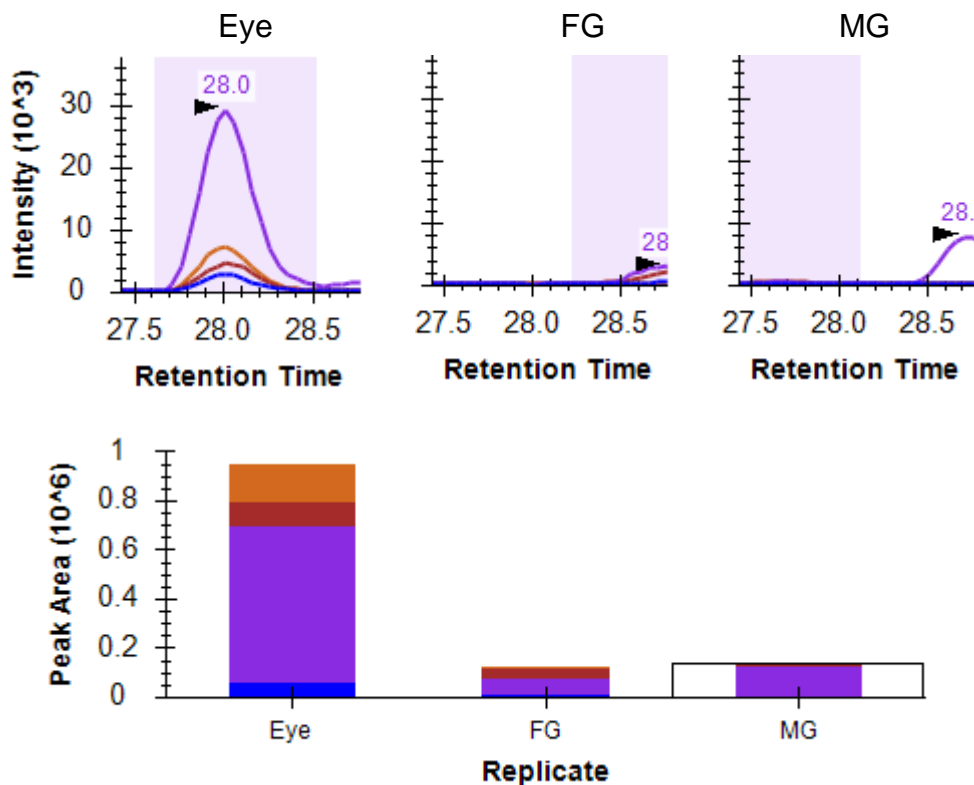

#### Peptide 4: K.EITPMFDGLNNR.V [791, 803]

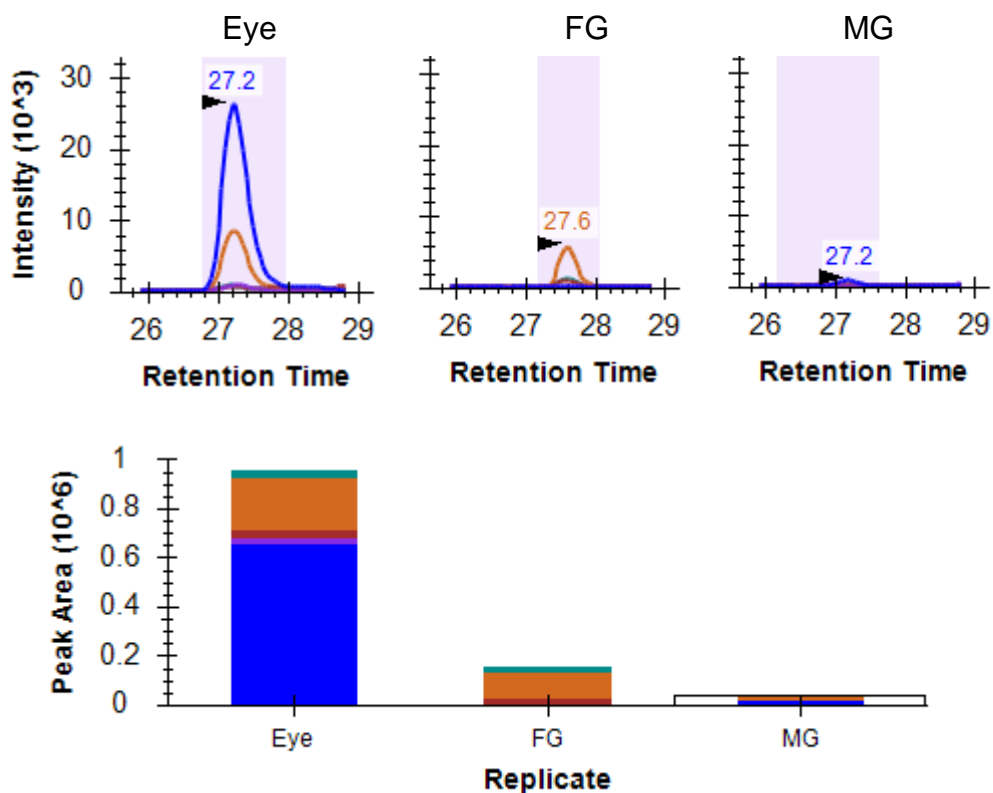

Supplementary Figure S13

a

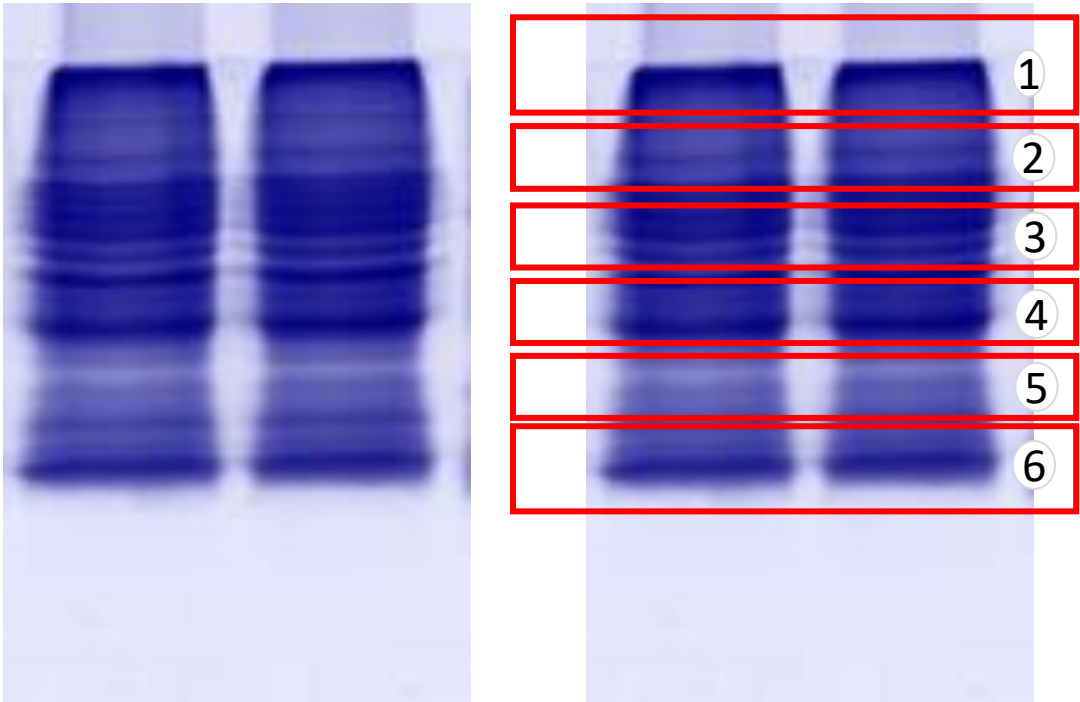

b

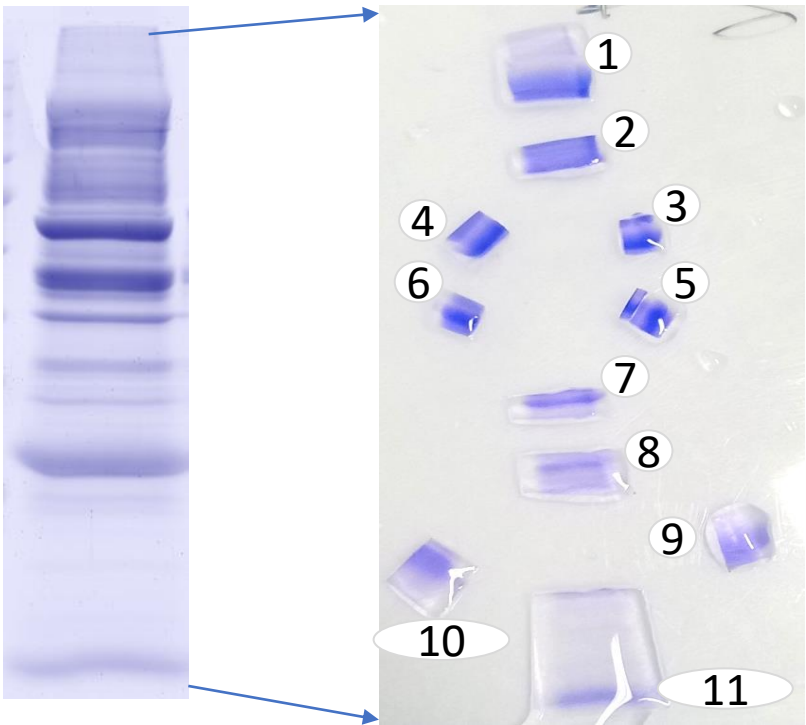

## Supplementary figures legends:

### **Figure S1| Overall protein profile and protein frequency based on molecular weights**

**a.** SDS-PAGE profile of all organs showing different band pattern across (GB- gall bladder, FG- female gonad, MG- male gonad, SC- spinal cord, **b.**

Number of proteins identified in fifteen organs where proteins were extracted with pH shift method with respective buffers, **c-d.** Venn diagram showing the fraction of proteome identified using three pHs and frequency distribution of total number of identified proteins based on molecular weights.

**Figure S2| An overview of phylogenetically annotated orthologs for the identified proteins,** showing distribution of identified proteins mapped against each ortholog group

**Figure S3| Heatmap for shared proteome expression across all studied organs;** highlighting few proteins with similar expression along with their description and functional details

**Figure S4| Heatmap for proteome expression for gonads** highlighting few important proteins for male and female gonad

**Figure S5| Frequency distribution of identified peptides based on peptide length,** where each node represents the experiment (sample).

**Figure S6| Representative spectra for phosphorylation, methylation and acetylation**

**Figure S7-S8| Comparative intensity of individual peptides for ZP2 (Zona-pellucida sperm binding protein 2 like-isoform X2):** Upper panel shows peak view for each transition of a peptide and lower bar graph shows the comparative peak area across three organs. Each color represents one transition.

**Figure S9-S10| Comparative intensity of individual peptides for TDRD5 (TUDOR domain containing-5 protein):** Upper panel shows peak view for each transition of a peptide and lower bar graph shows the comparative peak area across three organs. Each color represents one transition.

**Figure S11-S12| Comparative intensity of individual peptides for GNAT2 (cone cGMP-specific 2'-5' cyclic phosphodiesterase subunit alpha):** Upper panel shows peak view for each transition of a peptide and lower bar graph shows the comparative peak area across three organs. Each color represents one transition.

**Figure S13| Fractionation of samples for in gel digestion; a. Liver tissue sample, b. Plasma sample**
