# Supplementary material for: The Proteome Map and PeptideAtlas of a widely cultivated tropical water fish Labeo rohita: A resource for the Aquaculture Community
Source: Research Square preprint supplement (doi:10.21203/rs.3.rs-397364/v1), 2021-04-12
Supplement: Supplementary file 2 [file a117f6604a778e8f1bed2c80.xlsx]

## Sheet: Description_of_Worksheets
			Worksheet	Description
			Input KEGG	Organ wise Input ID list for KEGG mapper (Preferred gene names obtained after EggNOG analysis were taken as input). This sheet contains all the input IDS along with respective uniprot accession ID for each canonical protein.
			Eye_PA	Data for figure 2b (Eye) i.e. KEGG pathway output for Eye proteins and Input gene names for STRING networks
			Liver_PA	Data for figure 2b (Liver) i.e. KEGG pathway output for Eye proteins and Input gene names for STRING networks
			Heart_PA	Data for figure 2b (Heart) i.e. KEGG pathway output for Eye proteins and Input gene names for STRING networks
			Muscle_PA	Data for figure 2b (Muslce) i.e. KEGG pathway output for Eye proteins and Input gene names for STRING networks
			Organ KEGG Pathway	Organ wise total pathways mapped in KEGG mapper.

## Sheet: Input KEGG
Canonical Proteins			AB Input			Brain			Embryo			Eye			Female Gonad			Fin			GB			Gill			Gut			Heart			Kidney			Liver			Male Gonad			Muscle			Plasma			Scale
Gene_name	Protein Query		WD Preferred_name	Protein Query		WD Preferred_name	Protein Query		WD Preferred_name	Protein Query		WD Preferred_name	Protein Query		WD Preferred_name	Protein Query		WD Preferred_name	Protein Query		WD Preferred_name	Protein Query		WD Preferred_name	Protein Query		WD Preferred_name	Protein Query		WD Preferred_name	Protein Query		WD Preferred_name	Protein Query		WD Preferred_name	Protein Query		WD Preferred_name	Protein Query		WD Preferred_name	Protein Query		WD Preferred_name	Protein Query		WD Preferred_name	Protein Query
ND4	A0A0G3F7Z2		nqo1	A0A172E1Q5		arhgap1	A0A498MAL1		hspd1	A0A498NBD6		arhgap1	A0A498MAL1		hspd1	A0A498NBD6		hspd1	A0A498NBD6		arhgap1	A0A498MAL1		arhgap1	A0A498MAL1		arhgap1	A0A498MAL1		arhgap1	A0A498MAL1		arhgap1	A0A498MAL1		arhgap1	A0A498MAL1		arhgap1	A0A498MAL1		arhgap1	A0A498MAL1		arhgap1	A0A498MAL1		ENO2	A0A498LA61
nqo1	A0A172E1Q5		CKAP4	A0A498L1I1		copb1	A0A498MP80		ENO2	A0A498LA61		hspd1	A0A498NBD6		ENO2	A0A498LA61		ENO2	A0A498LA61		hspd1	A0A498NBD6		copb1	A0A498MP80		hspd1	A0A498NBD6		hspd1	A0A498NBD6		copb1	A0A498MP80		copb1	A0A498MP80		copb1	A0A498MP80		hspd1	A0A498NBD6		hspd1	A0A498NBD6		eno1	A0A498LMQ3
TBC1D24	A0A498L1B2		vapa	A0A498L1U6		hspd1	A0A498NBD6		eno1	A0A498LMQ3		ENO2	A0A498LA61		eno1	A0A498LMQ3		eno1	A0A498LMQ3		ENO2	A0A498LA61		hspd1	A0A498NBD6		ENO2	A0A498LA61		ENO2	A0A498LA61		hspd1	A0A498NBD6		hspd1	A0A498NBD6		hspd1	A0A498NBD6		ENO2	A0A498LA61		ENO2	A0A498LA61		ACTC1	A0A498MNR6
CKAP4	A0A498L1I1		hsd17b14	A0A498L2F6		ENO2	A0A498LA61		cct3	A0A498NIH7		eno1	A0A498LMQ3		cct3	A0A498NIH7		gnb2	A0A498MV49		eno1	A0A498LMQ3		ENO2	A0A498LA61		eno1	A0A498LMQ3		eno1	A0A498LMQ3		ENO2	A0A498LA61		ENO2	A0A498LA61		ENO2	A0A498LA61		eno1	A0A498LMQ3		eno1	A0A498LMQ3		actb	A0A498M6I9
mtmr9	A0A498L1P6		GNAL	A0A498L2H9		eno1	A0A498LMQ3		rplp0	A0A498NCF3		cct3	A0A498NIH7		rplp0	A0A498NCF3		myh9	A0A498MEV5		gnb2	A0A498MV49		eno1	A0A498LMQ3		gnb2	A0A498MV49		gnb2	A0A498MV49		eno1	A0A498LMQ3		eno1	A0A498LMQ3		eno1	A0A498LMQ3		rplp0	A0A498NCF3		ACTC1	A0A498MNR6		fbxl18	A0A498N7Y8
ppfia3	A0A498L2E3		lamb2	A0A498L2K9		gnb2	A0A498MV49		fbxl18	A0A498N7Y8		rplp0	A0A498NCF3		fbxl18	A0A498N7Y8		rplp0	A0A498NCF3		rplp0	A0A498NCF3		cct3	A0A498NIH7		cct3	A0A498NIH7		cct3	A0A498NIH7		gnb2	A0A498MV49		cct3	A0A498NIH7		gnb2	A0A498MV49		fbxl18	A0A498N7Y8		actb	A0A498M6I9		tubb	A0A498LBQ1
ppfia4	A0A498LE25		sidt2	A0A498L2U2		cct3	A0A498NIH7		actb	A0A498M6I9		ctnnb1	A0A498LCC7		actb	A0A498M6I9		ctnnb1	A0A498LCC7		fbxl18	A0A498N7Y8		snrpb	A0A498NF52		myh9	A0A498MEV5		rplp0	A0A498NCF3		cct3	A0A498NIH7		rplp0	A0A498NCF3		cct3	A0A498NIH7		actb	A0A498M6I9		fbxl18	A0A498N7Y8		tubb1	A0A498LLW9
ppfia2	A0A498LVU0		tcp1	A0A498L2V9		snrpb	A0A498NF52		ACTC1	A0A498MNR6		ACTC1	A0A498MNR6		ACTC1	A0A498MNR6		ACTC1	A0A498MNR6		actb	A0A498M6I9		rplp0	A0A498NCF3		rplp0	A0A498NCF3		ctnnb1	A0A498LCC7		snrpb	A0A498NF52		ctnnb1	A0A498LCC7		myh9	A0A498MEV5		ACTC1	A0A498MNR6		hspa8	A0A498LTI4		atp5a1	A0A498NGM2
hsd17b14	A0A498L2F6		tpt1	A0A498L311		rplp0	A0A498NCF3		clic4	A0A498NCC7		actb	A0A498M6I9		mcm4	A0A498MW63		fbxl18	A0A498N7Y8		ACTC1	A0A498MNR6		ctnnb1	A0A498LCC7		ctnnb1	A0A498LCC7		ACTC1	A0A498MNR6		rplp0	A0A498NCF3		ACTC1	A0A498MNR6		snrpb	A0A498NF52		sdha	A0A498M1C7		cbx5	A0A498LXY4		ATP5B	A0A498NJQ6
dcakd	A0A498L2H2		hdhd1	A0A498L319		ctnnb1	A0A498LCC7		ATP5B	A0A498NJQ6		fbxl18	A0A498N7Y8		sdha	A0A498M1C7		actb	A0A498M6I9		slc25a12	A0A498P3L6		ACTC1	A0A498MNR6		ACTC1	A0A498MNR6		actb	A0A498M6I9		ctnnb1	A0A498LCC7		fbxl18	A0A498N7Y8		rplp0	A0A498NCF3		cnn2	A0A498P452		gapdhs	A0A498L4F1		tpi1	A0A498N8T4
gap43	A0A498L2L0		coasy	A0A498L3R0		ACTC1	A0A498MNR6		cltc	A0A498LJQ6		cnn2	A0A498P452		dnajc11	A0A498N2W1		cnn2	A0A498P452		clic4	A0A498NCC7		fbxl18	A0A498N7Y8		actb	A0A498M6I9		fbxl18	A0A498N7Y8		ACTC1	A0A498MNR6		actb	A0A498M6I9		ctnnb1	A0A498LCC7		slc25a12	A0A498P3L6		slc25a5	A0A498N9E0		eno3	A0A498LJB6
hapln3	A0A498MJW1		mprip	A0A498L463		actb	A0A498M6I9		CLTCL1	A0A498NHX3		slc25a12	A0A498P3L6		cnn2	A0A498P452		slc25a12	A0A498P3L6		ATP5B	A0A498NJQ6		actb	A0A498M6I9		fbxl18	A0A498N7Y8		cnn2	A0A498P452		actb	A0A498M6I9		cnn2	A0A498P452		ACTC1	A0A498MNR6		clic4	A0A498NCC7		slc25a4	A0A498L8K0		gapdhs	A0A498L4F1
hapln4	A0A498MM10		COMMD6	A0A498L497		fbxl18	A0A498N7Y8		ppp2cb	A0A498LUI2		gnb4	A0A498MRU4		slc25a12	A0A498P3L6		clic4	A0A498NCC7		ppp2cb	A0A498LUI2		cnn2	A0A498P452		cnn2	A0A498P452		slc25a12	A0A498P3L6		fbxl18	A0A498N7Y8		slc25a12	A0A498P3L6		fbxl18	A0A498N7Y8		ATP5B	A0A498NJQ6		ATP5B	A0A498NJQ6		hspa8	A0A498LTI4
hapln1	A0A498NQ29		pfkp	A0A498L4B7		sdha	A0A498M1C7		ppp1cb	A0A498NFA7		cfap74	A0A498M340		clic4	A0A498NCC7		ATP5B	A0A498NJQ6		ppp1cb	A0A498NFA7		slc25a12	A0A498P3L6		slc25a12	A0A498P3L6		clic4	A0A498NCC7		cnn2	A0A498P452		clic4	A0A498NCC7		actb	A0A498M6I9		ppp1cb	A0A498NFA7		ACTR3	A0A498P3D0		hspa5	A0A498NQP7
mrps35	A0A498L2R3		gapdhs	A0A498L4F1		dnajc11	A0A498N2W1		ppp1cc	A0A498NRR2		gnb2	A0A498MV49		ATP5B	A0A498NJQ6		ppp2cb	A0A498LUI2		ppp1cc	A0A498NRR2		clic4	A0A498NCC7		clic4	A0A498NCC7		ATP5B	A0A498NJQ6		slc25a12	A0A498P3L6		ATP5B	A0A498NJQ6		sdha	A0A498M1C7		ppp1cc	A0A498NRR2		atp5a1	A0A498NGM2		vdac1	A0A498N8F6
sidt2	A0A498L2U2		c3	A0A498L4P6		cnn2	A0A498P452		psmc1	A0A498MFP7		ATP5B	A0A498NJQ6		ppp2cb	A0A498LUI2		ppp1cb	A0A498NFA7		vcp	A0A498MPP7		ATP5B	A0A498NJQ6		ATP5B	A0A498NJQ6		cltc	A0A498LJQ6		clic4	A0A498NCC7		ppp2cb	A0A498LUI2		dnajc11	A0A498N2W1		vcp	A0A498MPP7		tubb	A0A498LBQ1		pgk1	A0A498LZY5
tcp1	A0A498L2V9		dpys	A0A498L4W1		slc25a12	A0A498P3L6		tubb	A0A498LBQ1		ppp2cb	A0A498LUI2		ppp1cb	A0A498NFA7		ppp1cc	A0A498NRR2		psmc1	A0A498MFP7		ppp2cb	A0A498LUI2		cltc	A0A498LJQ6		CLTCL1	A0A498NHX3		ATP5B	A0A498NJQ6		ppp1cb	A0A498NFA7		cnn2	A0A498P452		tubb	A0A498LBQ1		mdh1	A0A498LUN9		psma5	A0A498NQY9
PLEKHG1	A0A498L2Y3		dhrs1	A0A498L4Y6		cfap74	A0A498M340		tubb1	A0A498LLW9		ppp1cb	A0A498NFA7		ppp1cc	A0A498NRR2		vcp	A0A498MPP7		tubb1	A0A498LLW9		ppp1cb	A0A498NFA7		CLTCL1	A0A498NHX3		ppp2cb	A0A498LUI2		cltc	A0A498LJQ6		ppp1cc	A0A498NRR2		slc25a12	A0A498P3L6		tubb1	A0A498LLW9		ugp2	A0A498NFB1		aldoc	A0A498M0I3
creb1	A0A498L309		copb2	A0A498L4Z1		ATP5B	A0A498NJQ6		psma8	A0A498M831		ppp1cc	A0A498NRR2		vcp	A0A498MPP7		psmc1	A0A498MFP7		tubb	A0A498LBQ1		ppp1cc	A0A498NRR2		ppp2cb	A0A498LUI2		ppp1cb	A0A498NFA7		CLTCL1	A0A498NHX3		vcp	A0A498MPP7		clic4	A0A498NCC7		psma8	A0A498M831		gdi1	A0A498LTB6		vim	A0A498N8B5
tpt1	A0A498L311		foxk1	A0A498L533		cltc	A0A498LJQ6		hspa5	A0A498MV04		vcp	A0A498MPP7		psmc1	A0A498MFP7		tubb	A0A498LBQ1		psma8	A0A498M831		vcp	A0A498MPP7		ppp1cb	A0A498NFA7		ppp1cc	A0A498NRR2		ppp2cb	A0A498LUI2		psmc1	A0A498MFP7		ATP5B	A0A498NJQ6		hspa5	A0A498MV04		pgk1	A0A498LZY5		krt18	A0A498L7I0
hdhd1	A0A498L319		npepps	A0A498L5J2		CLTCL1	A0A498NHX3		rpl30	A0A498N016		psmc1	A0A498MFP7		tubb	A0A498LBQ1		tubb1	A0A498LLW9		hspa5	A0A498MV04		psmc1	A0A498MFP7		ppp1cc	A0A498NRR2		vcp	A0A498MPP7		ppp1cb	A0A498NFA7		tubb1	A0A498LLW9		ppp2cb	A0A498LUI2		pabpc4	A0A498NFA9		ahcyl1	A0A498N8Y0		myh9	A0A498MEV5
tm9sf2	A0A498L371		abhd14b	A0A498L5N4		ppp2cb	A0A498LUI2		pabpc4	A0A498NFA9		tubb	A0A498LBQ1		tubb1	A0A498LLW9		hspa5	A0A498MV04		pabpc4	A0A498NFA9		tubb1	A0A498LLW9		vcp	A0A498MPP7		psmc1	A0A498MFP7		ppp1cc	A0A498NRR2		tubb	A0A498LBQ1		ppp1cb	A0A498NFA7		ralb	A0A498MK55		HSP90AA1	A0A498NTH7		rab11a	A0A498MBF7
cars2	A0A498L383		ctsa	A0A498L5Q4		ppp1cb	A0A498NFA7		rala	A0A498L7X2		tubb1	A0A498LLW9		snrnp200	A0A498MF00		pabpc4	A0A498NFA9		ralb	A0A498MK55		tubb	A0A498LBQ1		tubb	A0A498LBQ1		tubb1	A0A498LLW9		vcp	A0A498MPP7		psma8	A0A498M831		ppp1cc	A0A498NRR2		rala	A0A498L7X2		tpi1	A0A498N8T4		rpl11	A0A498N3H4
coasy	A0A498L3R0		endou	A0A498L5V8		ppp1cc	A0A498NRR2		ralb	A0A498MK55		psma8	A0A498M831		psma8	A0A498M831		hspa8	A0A498LI11		rala	A0A498L7X2		psma8	A0A498M831		tubb1	A0A498LLW9		tubb	A0A498LBQ1		psmc1	A0A498MFP7		hspa5	A0A498MV04		vcp	A0A498MPP7		rps5	A0A498LAX2		pgam2	A0A498N416		HSP90AA1	A0A498NTH7
pcca	A0A498L3R2		eif3a	A0A498L5W0		vcp	A0A498MPP7		rps5	A0A498LAX2		hspa5	A0A498MV04		hspa5	A0A498MV04		atp6v0a1	A0A498LWC4		hspa8	A0A498LTI4		hspa5	A0A498MV04		psma8	A0A498M831		psma8	A0A498M831		tubb	A0A498LBQ1		rpl30	A0A498N016		psmc1	A0A498MFP7		hspa8	A0A498LI11		eno3	A0A498LJB6		acaa2	A0A498NHY4
mccc1	A0A498MVF3		shmt1	A0A498L5W2		psmc1	A0A498MFP7		hspa8	A0A498LI11		pabpc4	A0A498NFA9		rpl30	A0A498N016		ireb2	A0A498LII5		psmc6	A0A498NBU2		rpl30	A0A498N016		hspa5	A0A498MV04		hspa5	A0A498MV04		tubb1	A0A498LLW9		pabpc4	A0A498NFA9		tubb	A0A498LBQ1		ireb2	A0A498LII5		lcp1	A0A498MAX9		krt8	A0A498LUC6
slc5a12	A0A498L3R4		emc3	A0A498L630		tubb	A0A498LBQ1		arpc2	A0A498MY97		qars	A0A498LZ02		pabpc4	A0A498NFA9		idh2	A0A498LB05		sec23a	A0A498MIT6		pabpc4	A0A498NFA9		pabpc4	A0A498NFA9		pabpc4	A0A498NFA9		psma8	A0A498M831		qars	A0A498LZ02		tubb1	A0A498LLW9		psmc6	A0A498NBU2		pls3	A0A498MZT6		kcnh6	A0A498NMG8
pitrm1	A0A498L3Z8		nap1l4	A0A498L642		tubb1	A0A498LLW9		ugdh	A0A498N1B2		ralb	A0A498MK55		qars	A0A498LZ02		ppp2ca	A0A498M0I0		acly	A0A498LWG6		ralb	A0A498MK55		rala	A0A498L7X2		ralb	A0A498MK55		hspa5	A0A498MV04		ralb	A0A498MK55		psma8	A0A498M831		idh2	A0A498LB05		hspa5	A0A498MV04		ahcy	A0A498N5E1
dis3	A0A498L404		glod4	A0A498L6A7		psma8	A0A498M831		stoml2	A0A498MJ13		rala	A0A498L7X2		ralb	A0A498MK55		cand1	A0A498MJ18		pcna	A0A498MYE6		rala	A0A498L7X2		ralb	A0A498MK55		rala	A0A498L7X2		pabpc4	A0A498NFA9		rala	A0A498L7X2		hspa5	A0A498MV04		actr2	A0A498N7G4		ppard	A0A498NF37		hsp90b1	A0A498M8E6
ppp1r13l	A0A498L484		GMFG	A0A498L6I2		hspa5	A0A498MV04		ireb2	A0A498LII5		rps5	A0A498LAX2		rala	A0A498L7X2		anxa6	A0A498LVS6		idh2	A0A498LB05		rps5	A0A498LAX2		rps5	A0A498LAX2		rps5	A0A498LAX2		rala	A0A498L7X2		rps5	A0A498LAX2		pabpc4	A0A498NFA9		tpi1	A0A498N8T4		cltc	A0A498LJQ6		aldob	A0A498LLJ4
COMMD6	A0A498L497		wbscr17	A0A498L6I4		snap91	A0A498NIL3		sec23a	A0A498MIT6		hspa8	A0A498LTI4		rps5	A0A498LAX2		ap1b1	A0A498NK81		rpl13a	A0A498NBD8		hspa8	A0A498LI11		hspa8	A0A498LTI4		hspa8	A0A498LTI4		ralb	A0A498MK55		rpl7a	A0A498LPH1		qars	A0A498LZ02		psma3	A0A498MDK5		tubb1	A0A498LLW9		mdh2	A0A498L7R5
arfgap3	A0A498L4B6		rps12	A0A498L6L1		pabpc4	A0A498NFA9		rpl34	A0A498LPR4		psmc6	A0A498NBU2		rpl7a	A0A498LPH1		ap2b1	A0A498MT56		ppp2ca	A0A498M0I0		arpc2	A0A498MY97		ugdh	A0A498N1B2		arpc2	A0A498MY97		rps5	A0A498LAX2		hspa8	A0A498LTI4		ralb	A0A498MK55		anxa6	A0A498LVS6		cfap74	A0A498M340		psma3	A0A498MDK5
dnajc11	A0A498L4D0		krt18	A0A498L6M3		ralb	A0A498MK55		pcna	A0A498MYE6		ap1b1	A0A498NK81		hspa8	A0A498LI11		cltc	A0A498LJQ6		actr2	A0A498N7G4		ireb2	A0A498LII5		ireb2	A0A498LII5		atp6v0a1	A0A498LWC4		rpl7a	A0A498LPH1		arpc2	A0A498MY97		rala	A0A498L7X2		pfkfb2	A0A498LRR2		ppp2r1b	A0A498MWR2		gnb2l1	A0A498M5K9
gapdhs	A0A498L4F1		ruvbl1	A0A498L6Q9		rala	A0A498L7X2		idh2	A0A498LB05		ap2b1	A0A498MT56		arpc2	A0A498MY97		itpr1	A0A498NQL6		psma3	A0A498MDK5		tln1	A0A498LW71		tln1	A0A498LW71		stoml2	A0A498MJ13		hspa8	A0A498LTI4		ugdh	A0A498N1B2		rps5	A0A498LAX2		uroc1	A0A498LEI0		cdc42	A0A498MTB3		hspb1	A0A498NLH3
zfr2	A0A498L4S2		gpx1	A0A498L6S7		rps5	A0A498LAX2		plekhm3	A0A498N4I9		idh2	A0A498LB05		stoml2	A0A498MJ13		C17orf53	A0A498L9A3		anxa6	A0A498LVS6		psmc6	A0A498NBU2		psmc6	A0A498NBU2		ireb2	A0A498LII5		arpc2	A0A498MY97		stoml2	A0A498MJ13		hspa8	A0A498LTI4		cltc	A0A498LJQ6		rps12	A0A498L6L1		gpi	A0A498MUB2
ssu72	A0A498L4V5		pip4k2a	A0A498L6U4		hspa8	A0A498LI11		rpl13a	A0A498NBD8		vps35	A0A498MDH6		ireb2	A0A498LII5		ACTN4	A0A498MXB9		ap1b1	A0A498NK81		sec23a	A0A498MIT6		sec23a	A0A498MIT6		psmc6	A0A498NBU2		stoml2	A0A498MJ13		ireb2	A0A498LII5		ireb2	A0A498LII5		C17orf53	A0A498L9A3		ctnnb1	A0A498LCC7		rpl23a	A0A498NCC9
rem2	A0A498L4V6		aldh1a2	A0A498L6Y8		atp6v0a1	A0A498LWC4		ppp2ca	A0A498M0I0		ppp2ca	A0A498M0I0		tln1	A0A498LW71		actn3	A0A498N915		ap2b1	A0A498MT56		pcna	A0A498MYE6		pcna	A0A498MYE6		sec23a	A0A498MIT6		ireb2	A0A498LII5		psmc6	A0A498NBU2		tln1	A0A498LW71		ACTN4	A0A498MXB9		vcp	A0A498MPP7		prdx1	A0A498M0B1
homez	A0A498L4W7		mcee	A0A498L6Z5		stoml2	A0A498MJ13		actr2	A0A498N7G4		actr2	A0A498LPS4		psmc6	A0A498NBU2		cdc42	A0A498MTB3		cltc	A0A498LJQ6		ap2b1	A0A498MT56		ap2b1	A0A498MT56		ap1b1	A0A498NK81		tln1	A0A498LW71		sec23a	A0A498MIT6		psmc6	A0A498NBU2		actn3	A0A498N915		arpc2	A0A498MY97		slc9b2	A0A498ML40
dhrs1	A0A498L4Y6		rpl27	A0A498L707		ireb2	A0A498LII5		psma3	A0A498MDK5		psma3	A0A498MDK5		sec23a	A0A498MIT6		DYNC1H1	A0A498LJD8		C17orf53	A0A498L9A3		ap1b1	A0A498NK81		ap1b1	A0A498NK81		ap2b1	A0A498MT56		psmc6	A0A498NBU2		acly	A0A498LWG6		sec23a	A0A498MIT6		gapdhs	A0A498L4F1		rab10	A0A498NK69		ywhah	A0A498MXB4
copb2	A0A498L4Z1		nxn	A0A498L710		psmc6	A0A498NBU2		cand1	A0A498MJ18		sept6	A0A498LGV3		rpl34	A0A498LPR4		slc25a4	A0A498L8K0		ACTN4	A0A498MXB9		cnn3	A0A498N571		idh2	A0A498LB05		cnn3	A0A498N571		sec23a	A0A498MIT6		rpl34	A0A498LPR4		acly	A0A498LWG6		agmat	A0A498LQL0		atp1a3	A0A498LG80		gcfc2	A0A498MHT5
foxk1	A0A498L533		tpk1	A0A498L766		sec23a	A0A498MIT6		anxa6	A0A498LVS6		cand1	A0A498MJ18		pcna	A0A498MYE6		slc25a5	A0A498N9E0		actn3	A0A498N915		idh2	A0A498LB05		rpl13a	A0A498NBD8		idh2	A0A498LB05		pcna	A0A498MYE6		ap1b1	A0A498NK81		rpl34	A0A498LPR4		cdc42	A0A498MTB3		plekhm3	A0A498N4I9		ywhaz	A0A498LYK8
wwox	A0A498L568		sord	A0A498L7C3		acly	A0A498LWG6		PRKAR2B	A0A498MN60		anxa6	A0A498LVS6		ap2b1	A0A498MT56		PRDX6	A0A498MG46		cops4	A0A498MM59		rpl13a	A0A498NBD8		vps35	A0A498MDH6		lars	A0A498N4V8		cnn3	A0A498N571		ap2b1	A0A498MT56		ap1b1	A0A498NK81		DYNC1H1	A0A498LJD8		pygm	A0A498MJP2		gmpr2	A0A498MKE8
slc4a4	A0A498L573		mdh2	A0A498L7R5		pcna	A0A498MYE6		snrpf	A0A498MPZ9		cltc	A0A498LJQ6		ap1b1	A0A498NK81		psmc6	A0A498NBU2		agmat	A0A498LQL0		coro1c	A0A498NGB7		ppp2ca	A0A498M0I0		rpl13a	A0A498NBD8		idh2	A0A498LB05		cnn3	A0A498N571		ap2b1	A0A498MT56		slc25a4	A0A498L8K0		RHOB	A0A498N0J0		pgam2	A0A498N416
ifi35	A0A498L577		eif3g	A0A498L7T5		ap2b1	A0A498MT56		C17orf53	A0A498L9A3		C17orf53	A0A498L9A3		ciapin1	A0A498MQQ6		capzb	A0A498MUC6		cdc42	A0A498MTB3		vps35	A0A498MDH6		actr2	A0A498N7G4		vps35	A0A498MDH6		plekhm3	A0A498N4I9		idh2	A0A498LB05		idh2	A0A498LB05		slc25a5	A0A498N9E0		eef2	A0A498NN34		rab15	A0A498M7U6
rbm42	A0A498L582		HPGD	A0A498L7V7		ap1b1	A0A498NK81		cbx5	A0A498LXY4		ACTN4	A0A498MXB9		cnn3	A0A498N571		phb	A0A498LX35		PRDX6	A0A498MG46		ppp2ca	A0A498M0I0		psma3	A0A498MDK5		ppp2ca	A0A498M0I0		coro1c	A0A498NGB7		plekhm3	A0A498N4I9		rpl13a	A0A498NBD8		PRDX6	A0A498MG46		ahcy	A0A498N5E1		rab10	A0A498NK69
NUDT7	A0A498L5A4		rala	A0A498L7X2		idh2	A0A498LB05		eif3g	A0A498L7T5		actn3	A0A498N915		idh2	A0A498LB05		atp5a1	A0A498NGM2		gnai1	A0A498LVT1		actr2	A0A498N7G4		cand1	A0A498MJ18		actr2	A0A498LPS4		vps35	A0A498MDH6		lars	A0A498N4V8		upf1	A0A498NMU3		cct6a	A0A498N9P4		cp	A0A498MX98		rab30	A0A498MYA6
psmc3ip	A0A498L5E6		aip	A0A498L7Y3		plekhm3	A0A498N4I9		ACTN4	A0A498MXB9		GFPT1	A0A498LN13		PNPT1	A0A498L5N9		ACTR3	A0A498P3D0		cct6a	A0A498N9P4		psma3	A0A498MDK5		anxa6	A0A498LVS6		psma3	A0A498MDK5		ppp2ca	A0A498M0I0		rpl13a	A0A498NBD8		vps35	A0A498MDH6		capzb	A0A498MUC6		psma5	A0A498NQY9		rab27a	A0A498NT07
bud31	A0A498L5I4		TRIP10	A0A498L7Z4		rpl13a	A0A498NBD8		actn3	A0A498MHZ7		psmc3	A0A498MJ03		lars	A0A498N4V8		rps4x	A0A498NLU9		capzb	A0A498MUC6		sept6	A0A498LGV3		PRKAR2B	A0A498MN60		anxa6	A0A498LVS6		actr2	A0A498N7G4		vps35	A0A498MDH6		ppp2ca	A0A498M0I0		phb	A0A498LX35		psmc1	A0A498MFP7		rab4a	A0A498MY60
snrpc	A0A498L5L6		pgp	A0A498L837		zfr2	A0A498L4S2		GFPT1	A0A498LN13		nup93	A0A498MB05		rpl13a	A0A498NBD8		pak2	A0A498MHP4		mapk1	A0A498LFW3		cand1	A0A498MJ18		snrpf	A0A498MPZ9		smarca5	A0A498LMB5		psma3	A0A498MDK5		ppp2ca	A0A498M0I0		actr2	A0A498LPS4		atp5a1	A0A498NGM2		RDX	A0A498NQF9		rab3c	A0A498NR85
ncoa5	A0A498L5N0		rpl10	A0A498L8B5		coro1c	A0A498NGB7		cops4	A0A498MM59		cdc42	A0A498MTB3		ppp2ca	A0A498M0I0		actn2	A0A498LQB7		mapk3	A0A498M6P1		anxa6	A0A498LVS6		itpr1	A0A498NQL6		C17orf53	A0A498L9A3		sept6	A0A498LGV3		actr2	A0A498LPS4		psma3	A0A498MDK5		rps4x	A0A498NLU9		tagap	A0A498NFZ5		RAB37	A0A498LTK1
abhd14b	A0A498L5N4		agxt	A0A498L8H1		vps35	A0A498MDH6		pin1	A0A498NLG8		slc25a4	A0A498L8K0		actr2	A0A498LPS4		rtcb	A0A498N2H4		phb	A0A498LX35		cltc	A0A498LJQ6		abce1	A0A498NQD7		eif3g	A0A498L7T5		anxa6	A0A498LVS6		psma3	A0A498MDK5		cand1	A0A498MJ18		myh9	A0A498MHH0		aph1a	A0A498LY90		rab27b	A0A498N7M2
PNPT1	A0A498L5N9		acp6	A0A498L8J9		ppp2ca	A0A498M0I0		psmc3	A0A498MJ03		slc25a5	A0A498N9E0		snrpb	A0A498NF52		arl8a	A0A498LJJ3		atp5a1	A0A498NGM2		snrpf	A0A498MPZ9		C17orf53	A0A498L9A3		ACTN4	A0A498MXB9		snrpf	A0A498MPZ9		cand1	A0A498MJ18		anxa6	A0A498LVS6		myh11	A0A498NNZ3		fbxo22	A0A498LC85		rab3b	A0A498LLB3
ctsa	A0A498L5Q4		slc25a4	A0A498L8K0		actr2	A0A498N7G4		mcm2	A0A498NLN5		cct6a	A0A498N9P4		psma3	A0A498MDK5		gnai1	A0A498LVT1		CTBP1	A0A498LQ97		abce1	A0A498NQD7		ACTN4	A0A498MXB9		actn3	A0A498N915		C17orf53	A0A498L9A3		anxa6	A0A498LVS6		cltc	A0A498LJQ6		actn2	A0A498LMB7		lactb	A0A498MZD1		aire	A0A498LNQ2
pkp1	A0A498L5R1		cpped1	A0A498L8L8		psma3	A0A498MDK5		agmat	A0A498LQL0		mapk3	A0A498M6P1		cand1	A0A498MJ18		rps3	A0A498NTE0		nars	A0A498M1S6		C17orf53	A0A498L9A3		actn3	A0A498MHZ7		nup93	A0A498MB05		eif3g	A0A498L7T5		pfkfb2	A0A498LRR2		snrpf	A0A498MPZ9		gnai1	A0A498LVT1		rab8a	A0A498N908		rab3d	A0A498NQ75
mgp	A0A498L5R4		inpp5d	A0A498L8Q0		sept6	A0A498LGV3		acbd3	A0A498MAD5		mapk1	A0A498LFW3		cltc	A0A498LJQ6		gnb4	A0A498MNF8		ACTR3	A0A498P3D0		cbx5	A0A498LXY4		GFPT1	A0A498LN13		cdc42	A0A498MTB3		ACTN4	A0A498MXB9		uroc1	A0A498LEI0		abce1	A0A498NQD7		rps3	A0A498NTE0		vim	A0A498N8B5		EHBP1L1	A0A498LMU5
endou	A0A498L5V8		igf2bp2	A0A498L8U9		cand1	A0A498MJ18		slc25a4	A0A498L8K0		ddx4	A0A498LUH2		abce1	A0A498NQD7		cfap74	A0A498M340		rps4x	A0A498NLU9		actn3	A0A498MHZ7		usp7	A0A498NBJ7		DYNC1H1	A0A498LJD8		actn3	A0A498MHZ7		cltc	A0A498LJQ6		C17orf53	A0A498L9A3		gnb4	A0A498MNF8		krt18	A0A498L7I0		rab39b	A0A498LGI2
eif3a	A0A498L5W0		aco2	A0A498L8V2		anxa6	A0A498LVS6		slc25a5	A0A498N9E0		ddx3x	A0A498N489		C17orf53	A0A498L9A3		GFPT1	A0A498LN13		myh9	A0A498MHH0		ACTN4	A0A498MXB9		agmat	A0A498LQL0		slc25a4	A0A498L8K0		GFPT1	A0A498LN13		snrpf	A0A498MPZ9		cbx5	A0A498LXY4		cfap74	A0A498M340		stt3a	A0A498MJ33		thoc6	A0A498NPP4
dhrsx	A0A498L5W1		prdx4	A0A498L8V5		PRKAR2B	A0A498MN60		PRDX6	A0A498MG46		pfkp	A0A498L4B7		cbx5	A0A498LXY4		rpl4	A0A498MG21		myh11	A0A498NNZ3		GFPT1	A0A498LN13		cdc42	A0A498MTB3		slc25a5	A0A498N9E0		psmc3	A0A498MJ03		abce1	A0A498NQD7		eif3g	A0A498L7T5		gnb2	A0A498MV49		tln1	A0A498LW71		rab4b	A0A498M0T0
shmt1	A0A498L5W2		pkp3	A0A498L903		smarca5	A0A498LMB5		cct6a	A0A498N9P4		atp5a1	A0A498NGM2		eif3g	A0A498L7T5		eno3	A0A498LJB6		actn2	A0A498LQB7		cdc42	A0A498MTB3		acbd3	A0A498MAD5		PRDX6	A0A498MG46		agmat	A0A498LQL0		C17orf53	A0A498L9A3		ACTN4	A0A498MXB9		ugp2	A0A498NFB1		tln2	A0A498MVU2		rab12	A0A498MTM6
sh3bp1	A0A498LBG3		tbc1d1	A0A498L925		cyfip2	A0A498LTV0		capzb	A0A498MUC6		CTBP1	A0A498LQ97		ACTN4	A0A498MXB9		hnrnpd	A0A498LTP4		arl8a	A0A498LJJ3		acbd3	A0A498MAD5		slc25a4	A0A498L8K0		gnai1	A0A498LVT1		cdc42	A0A498MTB3		eif3g	A0A498L7T5		actn3	A0A498MHZ7		mdh1	A0A498LUN9		capzb	A0A498MUC6		rab8a	A0A498N908
shmt2	A0A498N951		eif3b	A0A498L933		itpr1	A0A498NQL6		mapk1	A0A498LFW3		nars	A0A498M1S6		actn3	A0A498N915		RAB21	A0A498N7R7		rps3	A0A498NTE0		slc25a4	A0A498L8K0		slc25a5	A0A498N9E0		cpox	A0A498NRK2		slc25a4	A0A498L8K0		ACTN4	A0A498MXB9		GFPT1	A0A498LN13		rpl4	A0A498MG21		lancl1	A0A498MFQ8		rab9a	A0A498P559
tsfm	A0A498L5Y4		snx29	A0A498L965		C17orf53	A0A498L9A3		mapk3	A0A498M6P1		ACTR3	A0A498P3D0		GFPT1	A0A498LN13		snrpc	A0A498L5L6		cfap74	A0A498M340		slc25a5	A0A498N9E0		PRDX6	A0A498MG46		cct6a	A0A498N9P4		slc25a5	A0A498N9E0		actn3	A0A498N915		aldoc	A0A498M0I3		gdi1	A0A498LTB6		myl6	A0A498LTG0		rab35	A0A498MWD3
trub2	A0A498L5Y7		C17orf53	A0A498L9A3		cbx5	A0A498LXY4		ddx4	A0A498LUH2		capzb	A0A498MUC6		cops4	A0A498MM59		EIF3C	A0A498MRL6		gnb4	A0A498MNF8		PRDX6	A0A498MG46		gnai1	A0A498LVT1		capzb	A0A498MUC6		PRDX6	A0A498MG46		GFPT1	A0A498LN13		mcm7	A0A498MPF1		eno3	A0A498LJB6		myl3	A0A498M9S8		ahnak	A0A498NTE8
crbn	A0A498L5Z4		COQ7	A0A498L9L3		eif3g	A0A498L7T5		ddx3x	A0A498N489		actn2	A0A498LMB7		aldoc	A0A498M0I3		HNRNPR	A0A498M4Z7		ugp2	A0A498NFB1		gnai1	A0A498LVT1		cct6a	A0A498N9P4		mapk1	A0A498LFW3		gnai1	A0A498LVT1		cops4	A0A498MM59		psmc3	A0A498MJ03		hnrnpd	A0A498LTP4		myl4	A0A498MJ94		amylase	A0A498N5K0
ddi2	A0A498L5Z7		ndufa12	A0A498L9Q3		ACTN4	A0A498MXB9		phb	A0A498LX35		atp6v1a	A0A498NKE4		mcm7	A0A498MPF1		syncrip	A0A498LFA4		mdh1	A0A498LUN9		cct6a	A0A498N9P4		capzb	A0A498MUC6		mapk3	A0A498M6P1		cpox	A0A498NRK2		psmc3	A0A498MJ03		usp7	A0A498NBJ7		vapa	A0A498MCT5		myl1	A0A498NHU8		prdx2	A0A498LM50
alg11	A0A498L602		efhd1	A0A498L9R3		actn3	A0A498MHZ7		atp5a1	A0A498NGM2		rps3	A0A498NTE0		psmc3	A0A498MJ03		pfkp	A0A498L4B7		GFPT1	A0A498LN13		capzb	A0A498MUC6		mapk1	A0A498LFW3		ddx3x	A0A498N489		cct6a	A0A498N9P4		agmat	A0A498LQL0		gapdhs	A0A498L4F1		snrpc	A0A498L5L6		prph	A0A498M1K6		ldhb	A0A498MKB6
glyctk	A0A498L616		itih2	A0A498L9R8		GFPT1	A0A498LN13		CTBP1	A0A498LQ97		copg2	A0A498M9V6		mcm2	A0A498NLN5		eif4a3	A0A498MNF1		abcd3	A0A498NDM8		mapk1	A0A498LFW3		mapk3	A0A498M6P1		ddx4	A0A498LUH2		capzb	A0A498MUC6		nup93	A0A498MB05		tbl1xr1	A0A498MPR5		ndufv1	A0A498LWS5		ldhb	A0A498MKB6		acadm	A0A498LBY9
entpd8	A0A498L617		cpm	A0A498L9T1		cops4	A0A498MM59		nars	A0A498M1S6		ugp2	A0A498NFB1		cdc42	A0A498MTB3		eif4a2	A0A498NUZ0		tmed7	A0A498N8R8		mapk3	A0A498M6P1		phb	A0A498LX35		phb	A0A498LX35		mapk1	A0A498LFW3		cdc42	A0A498MTB3		cdc42	A0A498MTB3		pgk1	A0A498LZY5		krt8	A0A498LUC6		crmp1	A0A498MGP7
emc3	A0A498L630		CNDP1	A0A498L9Z2		psmc3	A0A498MJ03		rps4x	A0A498NLU9		mdh1	A0A498LUN9		DYNC1H1	A0A498LJD8		eif4a1	A0A498MY66		rpl4	A0A498MG21		ddx4	A0A498LUH2		pfkp	A0A498L4B7		pfkp	A0A498L4B7		mapk3	A0A498M6P1		slc25a4	A0A498L8K0		DYNC1H1	A0A498LJD8		syncrip	A0A498LFA4		kcnh6	A0A498NMG8		snap25	A0A498LLP4
nap1l4	A0A498L642		gmfb	A0A498LA25		usp7	A0A498NBJ7		myh9	A0A498MHH0		sec23a	A0A498MIT6		slc25a4	A0A498L8K0		sptan1	A0A498LWN5		hnrnpd	A0A498LTP4		ddx3x	A0A498N489		copb2	A0A498L4Z1		atp5a1	A0A498NGM2		ddx3x	A0A498N489		slc25a5	A0A498N9E0		slc25a4	A0A498L8K0		HNRNPR	A0A498M4Z7		ITIH4	A0A498NX86		nefl	A0A498N5J2
tex264	A0A498L647		ethe1	A0A498LA32		gapdhs	A0A498L4F1		myh11	A0A498NNZ3		phb	A0A498LX35		slc25a5	A0A498N9E0		rcc2	A0A498LBD4		etf1	A0A498N525		phb	A0A498LX35		atp5a1	A0A498NGM2		CTBP1	A0A498LQ97		ddx4	A0A498LUH2		PRDX6	A0A498MG46		slc25a5	A0A498N9E0		gnb2l1	A0A498M5K9		itih3	A0A498MUL6		ina	A0A498LBX2
glod4	A0A498L6A7		pygl	A0A498LA35		agmat	A0A498LQL0		actn2	A0A498LQB7		gdi1	A0A498LTB6		PRDX6	A0A498MG46		atp1a3	A0A498LG80		timm9	A0A498MZJ9		pfkp	A0A498L4B7		psmc1	A0A498MFP7		nars	A0A498M1S6		phb	A0A498LX35		gnai1	A0A498LVT1		PRDX6	A0A498MG46		SLC25A6	A0A498LN76		wnk2	A0A498N2P5		nefm	A0A498NC53
eif4enif1	A0A498L6B4		nsfl1c	A0A498LA40		cdc42	A0A498MTB3		atp6v1a	A0A498NKE4		eno3	A0A498LJB6		cct6a	A0A498N9P4		copb2	A0A498L4Z1		vapa	A0A498MCT5		copb2	A0A498L4Z1		CTBP1	A0A498LQ97		ACTR3	A0A498P3D0		pfkp	A0A498L4B7		cpox	A0A498NRK2		cct6a	A0A498N9P4		eif4a1	A0A498MY66		pygb	A0A498P430		prph	A0A498M1K6
cadps	A0A498L6C1		ENO2	A0A498LA61		DYNC1H1	A0A498LJD8		gnai1	A0A498LVT1		hnrnpd	A0A498LTP4		capzb	A0A498MUC6		HSP90AA1	A0A498NTH7		ndufv1	A0A498LWS5		atp5a1	A0A498NGM2		nars	A0A498M1S6		rps4x	A0A498NLU9		atp5a1	A0A498NGM2		cct6a	A0A498N9P4		capzb	A0A498MUC6		eif4a3	A0A498MNF1		pygl	A0A498LA35		des	A0A498NNZ4
usp4	A0A498L6D0		ppib	A0A498LAB9		acbd3	A0A498MAD5		rps3	A0A498NTE0		iars	A0A498NJ41		mapk1	A0A498LFW3		strbp	A0A498MJX3		EIF3C	A0A498MRL6		rcc2	A0A498LBD4		ACTR3	A0A498P3D0		pak2	A0A498MHP4		rcc2	A0A498LBD4		capzb	A0A498MUC6		mapk1	A0A498LFW3		eif4a2	A0A498NUZ0		ywhah	A0A498MXB4		psmc1	A0A498MFP7
hgs	A0A498L6D4		cdk14	A0A498LAD3		slc25a4	A0A498L8K0		cfap74	A0A498M340		vapa	A0A498MCT5		mapk3	A0A498M6P1		cct5	A0A498LK15		HNRNPR	A0A498M4Z7		CTBP1	A0A498LQ97		rps4x	A0A498NLU9		myh11	A0A498NNZ3		CTBP1	A0A498LQ97		mapk1	A0A498LFW3		mapk3	A0A498M6P1		atad3a	A0A498MCP4		gcfc2	A0A498MHT5		ctnnb1	A0A498LCC7
arl8a	A0A498LJJ3		dld	A0A498LAH2		slc25a5	A0A498N9E0		gnb4	A0A498MNF8		coro1c	A0A498NGB7		ddx3x	A0A498N489		cisd1	A0A498N8E5		syncrip	A0A498LFA4		nars	A0A498M1S6		myh11	A0A498NNZ3		myh9	A0A498MHH0		nars	A0A498M1S6		mapk3	A0A498M6P1		ddx4	A0A498LUH2		ube2l3	A0A498LC94		ywhaz	A0A498LYK8		KATNAL1	A0A498M7J9
nudt3	A0A498L6E0		znf592	A0A498LAI4		PRDX6	A0A498MG46		copg2	A0A498M9V6		rpl22	A0A498MSK2		ddx4	A0A498LUH2		tpi1	A0A498N8T4		ckb	A0A498MSZ6		ACTR3	A0A498P3D0		actn2	A0A498LMB7		actn2	A0A498LQB7		ACTR3	A0A498P3D0		ddx4	A0A498LUH2		ddx3x	A0A498N489		atp1a3	A0A498LG80		hsp90b1	A0A498M8E6		dhrs12	A0A498N7U4
tbc1d22a	A0A498L6E5		fscn1	A0A498LAK0		gnai1	A0A498LVT1		plekhm2	A0A498MXX3		NCBP1	A0A498N4T4		phb	A0A498LX35		rcn1	A0A498NFK2		gnb2l1	A0A498M5K9		rps4x	A0A498NLU9		arl8a	A0A498LJJ3		atp6v1a	A0A498NKE4		rps4x	A0A498NLU9		ddx3x	A0A498N489		phb	A0A498LX35		HSP90AA1	A0A498NTH7		aldob	A0A498LLJ4		atp6v1g1	A0A498M939
dip2b	A0A498L6F7		crabp1	A0A498LAL7		cpox	A0A498NRK2		gnb2	A0A498MV49		snx29	A0A498L965		copb2	A0A498L4Z1		samm50	A0A498LMW5		eif4a2	A0A498NUZ0		pak2	A0A498MHP4		atp6v1a	A0A498NKE4		rps3	A0A498NTE0		myh9	A0A498MHH0		phb	A0A498LX35		snrnp200	A0A498MF00		hsp90b1	A0A498M8E6		slc2a2	A0A498LBV9		col11a1	A0A498NVZ6
dip2a	A0A498LHS4		wdr47	A0A498LAM7		cct6a	A0A498N9P4		ugp2	A0A498NFB1		ndufv1	A0A498LWS5		atp5a1	A0A498NGM2		dnm1l	A0A498P3I9		eif4a3	A0A498MNF1		myh11	A0A498NNZ3		rps3	A0A498NTE0		cfap74	A0A498M340		myh11	A0A498NNZ3		copb2	A0A498L4Z1		copb2	A0A498L4Z1		tmed2	A0A498N739		psma1	A0A498MAF0		sptan1	A0A498LWN5
dip2c	A0A498NNL2		wdr61	A0A498LAT7		capzb	A0A498MUC6		mdh1	A0A498LUN9		tcp1	A0A498L2V9		rcc2	A0A498LBD4		mtap	A0A498NXD1		eif4a1	A0A498MY66		myh9	A0A498MHH0		cfap74	A0A498M340		gnb4	A0A498MNF8		actn2	A0A498LQB7		atp5a1	A0A498NGM2		atp5a1	A0A498NGM2		gps1	A0A498NIJ4		cct6a	A0A498N9P4		cp	A0A498MX98
srgap3	A0A498L6G6		pcbp2	A0A498LAX0		mapk1	A0A498LFW3		hspa9	A0A498N369		fscn1	A0A498LAK0		CTBP1	A0A498LQ97		atp6v1b2	A0A498MKC1		sptan1	A0A498LWN5		actn2	A0A498LMB7		gnb4	A0A498MNF8		copg2	A0A498M9V6		arl8a	A0A498LJJ3		CTBP1	A0A498LQ97		rcc2	A0A498LBD4		prph	A0A498M1K6		psmd14	A0A498LT27		cat	A0A498N4M9
srgap2	A0A498LLS7		rps5	A0A498LAX2		mapk3	A0A498M6P1		rpl4	A0A498MG21		syncrip	A0A498LFA4		nars	A0A498M1S6		capza1	A0A498MN53		ube2l3	A0A498LC94		arl8a	A0A498LJJ3		copg2	A0A498M9V6		ugp2	A0A498NFB1		atp6v1a	A0A498NKE4		nars	A0A498M1S6		CTBP1	A0A498LQ97		des	A0A498NNZ4		psma3	A0A498MDK5		ckb	A0A498MSZ6
srgap1	A0A498MVH4		cs	A0A498LAX4		ddx3x	A0A498N489		gdi1	A0A498LTB6		HNRNPR	A0A498M4Z7		ACTR3	A0A498P3D0		mapk3	A0A498M6P1		aldh7a1	A0A498M088		atp6v1a	A0A498NKE4		MYO1D	A0A498LMR6		mdh1	A0A498LUN9		rps3	A0A498NTE0		ACTR3	A0A498P3D0		nars	A0A498M1S6		nefm	A0A498NC53		gpi	A0A498MUB2		mdh1	A0A498LUN9
nol9	A0A498N5D6		idh2	A0A498LB05		ddx4	A0A498LUH2		hnrnpd	A0A498LTP4		ckb	A0A498MSZ6		rps4x	A0A498NLU9		mapk1	A0A498LFW3		psmd2	A0A498MHT8		rps3	A0A498NTE0		mdh1	A0A498LUN9		hspa9	A0A498N369		cfap74	A0A498M340		rps4x	A0A498NLU9		ACTR3	A0A498P3D0		vim	A0A498MWX7		ckm	A0A498LPZ0		atp5o	A0A498NAQ8
rps12	A0A498L6L1		ppp2r5c	A0A498LB61		phb	A0A498LX35		timm9	A0A498MZJ9		eif3b	A0A498L933		myh9	A0A498MHH0		eif2s3	A0A498LEC0		atp1a3	A0A498LG80		cfap74	A0A498M340		ugp2	A0A498NFB1		GFPT1	A0A498LN13		gnb4	A0A498MNF8		myh9	A0A498MHH0		rps4x	A0A498NLU9		ina	A0A498LBX2		ireb2	A0A498LII5		ppib	A0A498LAB9
dhrs11	A0A498LZV5		bgn	A0A498LBF9		pfkp	A0A498L4B7		vapa	A0A498MCT5		eif4a1	A0A498MY66		myh11	A0A498NNZ3		atp2a3	A0A498LYA4		psmc4	A0A498NK57		gnb4	A0A498MNF8		wdr34	A0A498LXI4		rpl4	A0A498MG21		copg2	A0A498M9V6		myh11	A0A498NNZ3		myh11	A0A498NNZ3		rab11a	A0A498MBF7		ipo5	A0A498NA00		dgkz	A0A498N004
mrpl12	A0A498L6M4		sh3bp1	A0A498LBG3		snrnp200	A0A498MF00		rpl22	A0A498MSK2		eif4a3	A0A498MNF1		psmc4	A0A498NK57		atp2a1	A0A498M1A1		HSP90AA1	A0A498NTH7		copg2	A0A498M9V6		set	A0A498NHZ1		gdi1	A0A498LTB6		plekhm2	A0A498MXX3		actn2	A0A498LQB7		actn2	A0A498LMB7		cisd1	A0A498N8E5		prdx1	A0A498M0B1		fabp3	A0A498MWH4
ruvbl1	A0A498L6Q9		btd	A0A498LBI2		atp5a1	A0A498NGM2		snx29	A0A498L965		eif4a2	A0A498NUZ0		actn2	A0A498LQB7		tagap	A0A498NFZ5		fkbp2	A0A498N4H0		ugp2	A0A498NFB1		tmed7	A0A498N8R8		eno3	A0A498LJB6		ugp2	A0A498NFB1		rtcb	A0A498N2H4		rtcb	A0A498N2H4		sfxn1	A0A498LYC7		snd1	A0A498MKL8		fabp7	A0A498LTJ0
pip4k2a	A0A498L6U4		DYNC1H1	A0A498LBI5		CTBP1	A0A498LQ97		ndufv1	A0A498LWS5		sptan1	A0A498LWN5		rtcb	A0A498N2H4		RDX	A0A498NQF9		hsp90b1	A0A498M8E6		mdh1	A0A498LUN9		rpl4	A0A498MG21		hnrnpd	A0A498LTP4		mdh1	A0A498LUN9		arl8a	A0A498LJJ3		arl8a	A0A498LJJ3		rpl7a	A0A498LPH1		ppp2r2d	A0A498LGJ5		myl6	A0A498LTG0
pip4k2c	A0A498LNL7		aldoc	A0A498LBK2		nars	A0A498M1S6		EIF3C	A0A498MRL6		aldh7a1	A0A498M088		arl8a	A0A498LJJ3		coro1c	A0A498NGB7		gps1	A0A498NIJ4		tmed7	A0A498N8R8		smad5	A0A498NU77		RAB21	A0A498N7R7		psma2	A0A498MW39		atp6v1a	A0A498NKE4		atp6v1a	A0A498NKE4		rcn1	A0A498NFK2		copg2	A0A498M9V6		col6a1	A0A498NRY6
HYKK	A0A498L6W1		hsd17b10	A0A498LBK9		ACTR3	A0A498P3D0		pgk1	A0A498LZY5		psmd2	A0A498MHT8		atp6v1a	A0A498NKE4		lcp1	A0A498MAX9		cct5	A0A498LK15		rpl4	A0A498MG21		gdi1	A0A498LTB6		frmd6	A0A498LS50		abcd3	A0A498NDM8		rps3	A0A498NTE0		gnai1	A0A498LVT1		tufm	A0A498NTL2		rps3	A0A498NTE0		tf	A0A498N853
ARMC3	A0A498L6X2		tubb	A0A498LBQ1		rps4x	A0A498NLU9		psmc6	A0A498NBU2		atp1a3	A0A498LG80		gnai1	A0A498LVT1		pls3	A0A498MZT6		ina	A0A498LBX2		gdi1	A0A498LTB6		eno3	A0A498LJB6		vapa	A0A498MCT5		tmed7	A0A498N8R8		cfap74	A0A498M340		rps3	A0A498NTE0		pgam2	A0A498N416		myh9	A0A498MEV5		col12a1	A0A498M2L1
mcee	A0A498L6Z5		shbg	A0A498LBR0		pak2	A0A498MHP4		fscn1	A0A498LAK0		psmc4	A0A498NK57		rps3	A0A498NTE0		ppard	A0A498NF37		vim	A0A498MWX7		eno3	A0A498LJB6		hnrnpd	A0A498LTP4		coro1c	A0A498NGB7		rpl4	A0A498MG21		gnb4	A0A498MNF8		cfap74	A0A498M340		tcp1	A0A498L2V9		hars	A0A498NES3		PHKA2	A0A498NR97
rpl27	A0A498L707		atp5h	A0A498LBS5		myh11	A0A498NNZ3		HNRNPR	A0A498M4Z7		copb2	A0A498L4Z1		cfap74	A0A498M340		EIF5A	A0A498MEW8		prph	A0A498M1K6		hnrnpd	A0A498LTP4		frmd6	A0A498LS50		prps1	A0A498MZJ1		smad5	A0A498NU77		copg2	A0A498M9V6		gnb4	A0A498MNF8		flnc	A0A498NCY2		aldoc	A0A498M0I3		postn	A0A498LEZ7
nxn	A0A498L710		prrt2	A0A498LBU4		myh9	A0A498MHH0		syncrip	A0A498LFA4		nampt	A0A498NA34		gnb4	A0A498MNF8		dhx9	A0A498MI27		des	A0A498NNZ4		iars	A0A498NJ41		coro1c	A0A498NGB7		rpl22	A0A498MSK2		gdi1	A0A498LTB6		plekhm2	A0A498MXX3		copg2	A0A498M9V6		mtap	A0A498NXD1		actn3	A0A498MHZ7		dcn	A0A498M9M2
mybpc3	A0A498M5B5		KCTD12	A0A498LBV4		actn2	A0A498LQB7		ckb	A0A498MSZ6		HSP90AA1	A0A498NTH7		copg2	A0A498M9V6		hsdl2	A0A498MPQ6		nefm	A0A498NC53		RAB21	A0A498N7R7		rpl22	A0A498MSK2		NCBP1	A0A498N4T4		eno3	A0A498LJB6		MYO1D	A0A498LMR6		ugp2	A0A498NFB1		RPL27A	A0A498M799		ACTN4	A0A498MXB9		tnn	A0A498MVF0
naglu	A0A498L735		col5a3	A0A498LBV7		arl8a	A0A498LJJ3		u2af1	A0A498LY45		hsp90b1	A0A498M8E6		plekhm2	A0A498MXX3		ndufs8	A0A498MMX0		rab11a	A0A498MBF7		etf1	A0A498N525		kif5b	A0A498M763		snx29	A0A498L965		hnrnpd	A0A498LTP4		mdh1	A0A498LUN9		mdh1	A0A498LUN9		pcbp2	A0A498LAX0		gsr	A0A498N4Q6		fgg	A0A498LEH5
dcaf13	A0A498L760		slc2a2	A0A498LBV9		atp6v1a	A0A498NKE4		gnb2l1	A0A498M5K9		gps1	A0A498NIJ4		ugp2	A0A498NFB1		sf3a2	A0A498MZH9		cisd1	A0A498N8E5		frmd6	A0A498LS50		snx29	A0A498L965		ndufv1	A0A498LWS5		RAB21	A0A498N7R7		ugp2	A0A498NFB1		ruvbl1	A0A498L6Q9		atp6v1b2	A0A498MKC1		amylase	A0A498N5K0		lum	A0A498ML95
tpk1	A0A498L766		ina	A0A498LBX2		upf1	A0A498NMU3		SLC25A6	A0A498LN76		cct5	A0A498LK15		mdh1	A0A498LUN9		actr2	A0A498LPS4		tpi1	A0A498N8T4		timm9	A0A498MZJ9		sfxn1	A0A498LYC7		EIF3C	A0A498MRL6		frmd6	A0A498LS50		abcd3	A0A498NDM8		tmed7	A0A498N8R8		eif2s3	A0A498LEC0		thbs4	A0A498MP89		blvrb	A0A498MNG1
sord	A0A498L7C3		acadm	A0A498LBY9		rps3	A0A498NTE0		eif4a1	A0A498MY66		prph	A0A498M1K6		hspa9	A0A498N369		RPS3A	A0A498LV15		pgam2	A0A498N416		vapa	A0A498MCT5		snrpc	A0A498L5L6		fscn1	A0A498LAK0		vapa	A0A498MCT5		tmed7	A0A498N8R8		rpl4	A0A498MG21		aldoc	A0A498M0I3		prdx2	A0A498LM50		c3	A0A498N260
relb	A0A498L7E3		spcs3	A0A498LC14		gnb4	A0A498MNF8		eif4a3	A0A498MNF1		des	A0A498NNZ4		ruvbl1	A0A498L6Q9		rps12	A0A498L6L1		tcp1	A0A498L2V9		prps1	A0A498MZJ1		ndufv1	A0A498LWS5		ahcyl1	A0A498N8Y0		prps1	A0A498MZJ1		rpl4	A0A498MG21		gdi1	A0A498LTB6		atp2a3	A0A498LYA4		sptan1	A0A498LWN5		dlg5	A0A498LL74
LSAMP	A0A498L7M3		bckdha	A0A498LC60		copg2	A0A498M9V6		eif4a2	A0A498NUZ0		nefm	A0A498NC53		rfc2	A0A498MYK7		ckmt2	A0A498MJE0		samm50	A0A498LMW5		snx29	A0A498L965		tcp1	A0A498L2V9		syncrip	A0A498LFA4		rpl22	A0A498MSK2		smad5	A0A498NU77		eno3	A0A498LJB6		atp2a1	A0A498NW58		adk	A0A498N453		zmiz2	A0A498N9I9
rtn4	A0A498L7M8		bmi1	A0A498LC72		MYO1D	A0A498LMR6		sptan1	A0A498LWN5		ina	A0A498LBX2		tmed7	A0A498N8R8		ppp2r1b	A0A498MWR2		farsb	A0A498NU48		tcp1	A0A498L2V9		ddx3x	A0A498N489		HNRNPR	A0A498M4Z7		sfxn1	A0A498LYC7		gdi1	A0A498LTB6		hnrnpd	A0A498LTP4		RDX	A0A498NQF9		des	A0A498NNZ4		got1	A0A498LHI8
vps8	A0A498L7N5		fbxo22	A0A498LC85		mdh1	A0A498LUN9		ube2l3	A0A498LC94		vim	A0A498MWX7		rpl4	A0A498MG21		slc25a3	A0A498NRX4		eno3	A0A498LJB6		EIF3C	A0A498MRL6		EIF3C	A0A498MRL6		ckb	A0A498MSZ6		tcp1	A0A498L2V9		eno3	A0A498LJB6		iars	A0A498NJ41		tagap	A0A498NFZ5		nefm	A0A498NC53		fbn1	A0A498M6Z5
gemin8	A0A498L7Q0		ube2l3	A0A498LC94		ugp2	A0A498NFB1		aldh7a1	A0A498M088		cisd1	A0A498N8E5		gdi1	A0A498LTB6		slc25a13	A0A498N6M3		mtap	A0A498NXD1		syncrip	A0A498LFA4		pgk1	A0A498LZY5		eif3b	A0A498L933		EIF3C	A0A498MRL6		hnrnpd	A0A498LTP4		RAB21	A0A498N7R7		rps23	A0A498LR94		ina	A0A498LBX2		col6a6	A0A498LQS3
dnmt1	A0A498L7Q3		tom1l2	A0A498LC95		tmed7	A0A498N8R8		atp1a3	A0A498LG80		tpi1	A0A498N8T4		eno3	A0A498LJB6		pgm1	A0A498NUJ2		RPL27A	A0A498M799		HNRNPR	A0A498M4Z7		ahcyl1	A0A498N8Y0		u2af1	A0A498LY45		syncrip	A0A498LFA4		iars	A0A498NJ41		timm9	A0A498MZJ9		sptan1	A0A498LWN5		nefl	A0A498MI91		anxa1	A0A498NJQ3
map6	A0A498L7R2		ctnnb1	A0A498LCC7		rpl4	A0A498MG21		copb2	A0A498L4Z1		sfxn1	A0A498LYC7		hnrnpd	A0A498LTP4		vdac1	A0A498N8F6		atp6v1b2	A0A498MKC1		ckb	A0A498MSZ6		syncrip	A0A498LFA4		gnb2l1	A0A498M5K9		HNRNPR	A0A498M4Z7		RAB21	A0A498N7R7		vapa	A0A498MCT5		ppard	A0A498NF37		rplp0	A0A498NCF3		itih2	A0A498L9R8
mdh2	A0A498L7R5		pdxk	A0A498LCE5		smad5	A0A498NU77		HSP90AA1	A0A498NTH7		rpl7a	A0A498LPH1		iars	A0A498NJ41		vdac2	A0A498P5M2		DYNC1H1	A0A498LJD8		eif3b	A0A498L933		HNRNPR	A0A498M4Z7		SLC25A6	A0A498LN76		ckb	A0A498MSZ6		frmd6	A0A498LS50		coro1c	A0A498NGB7		EIF5A	A0A498MEW8		ephx2	A0A498NP55		ephx2	A0A498NP55
uevld	A0A498L7R9		hps4	A0A498LCF8		gdi1	A0A498LTB6		fkbp2	A0A498N4H0		tufm	A0A498NTL2		frmd6	A0A498LS50		rpl30	A0A498N016		eif2s3	A0A498LEC0		u2af1	A0A498LY45		ckb	A0A498MSZ6		eif4a1	A0A498MY66		eif3b	A0A498L933		timm9	A0A498MZJ9		prps1	A0A498MZJ1		dhx9	A0A498MI27		actn2	A0A498LQB7		nprl3	A0A498NFT9
eif3g	A0A498L7T5		hdlbp	A0A498LCI4		eno3	A0A498LJB6		hsp90b1	A0A498M8E6		pgam2	A0A498N416		vapa	A0A498MCT5		gnb2l1	A0A498M5K9		RDX	A0A498NQF9		gnb2l1	A0A498M5K9		gnb2l1	A0A498M5K9		eif4a2	A0A498NUZ0		u2af1	A0A498LY45		vapa	A0A498MCT5		rpl22	A0A498MSK2		hsdl2	A0A498MPQ6		cpn1	A0A498LNK8		eppk1	A0A498NQT4
exosc5	A0A498L7U9		calcoco2	A0A498LCL9		hnrnpd	A0A498LTP4		tmed2	A0A498N739		samm50	A0A498LMW5		coro1c	A0A498NGB7		gorasp2	A0A498P6G7		tagap	A0A498NFZ5		SLC25A6	A0A498LHT6		ddx1	A0A498LFM1		eif4a3	A0A498MNF1		gnb2l1	A0A498M5K9		prps1	A0A498MZJ1		NCBP1	A0A498N4T4		ndufs8	A0A498MMX0		aars	A0A498MDH5		thbs1	A0A498M5X4
HPGD	A0A498L7V7		CD207	A0A498LCQ2		iars	A0A498NJ41		gps1	A0A498NIJ4		farsb	A0A498NU48		prps1	A0A498MZJ1		ndufs1	A0A498NNW4		coro1c	A0A498NGB7		eif4a3	A0A498MNF1		SLC25A6	A0A498LHT6		sptan1	A0A498LWN5		SLC25A6	A0A498LHT6		rpl22	A0A498MSK2		snx29	A0A498L965		RPS3A	A0A498LV15		CNDP1	A0A498LAC0		fkbp9	A0A498N0E3
aip	A0A498L7Y3		tgm1	A0A498LCV7		RAB21	A0A498N7R7		prph	A0A498M1K6		flnc	A0A498NCY2		rpl22	A0A498MSK2		arpc2	A0A498MY97		rps23	A0A498LR94		eif4a2	A0A498NUZ0		eif4a1	A0A498MY66		csnk2b	A0A498MJ87		eif4a3	A0A498MNF1		snx29	A0A498L965		tcp1	A0A498L2V9		rps12	A0A498L6L1		gps1	A0A498NIJ4		hmgb2	A0A498LD75
pgp	A0A498L837		EPB41L2	A0A498LCY6		frmd6	A0A498LS50		des	A0A498NNZ4		dnm1l	A0A498P3I9		snx29	A0A498L965		rpl27	A0A498L707		erlin1	A0A498NDY9		eif4a1	A0A498MY66		eif4a2	A0A498NUZ0		ube2l3	A0A498LC94		eif4a2	A0A498NUZ0		sfxn1	A0A498LYC7		EIF3C	A0A498MRL6		ckmt2	A0A498MJE0		hapln1	A0A498NQ29		jakmip2	A0A498N6P6
gpm6a	A0A498LGQ1		rps10	A0A498LD02		pip4k2c	A0A498LNL7		nefm	A0A498NC53		mtap	A0A498NXD1		ndufv1	A0A498LWS5		gdi1	A0A498LTB6		lcp1	A0A498MAX9		sptan1	A0A498LWN5		eif4a3	A0A498MNF1		aldh7a1	A0A498M088		eif4a1	A0A498MY66		ndufv1	A0A498LWS5		pgk1	A0A498LZY5		cse1l	A0A498MSB4		npepl1	A0A498MZQ6		bgn	A0A498LBF9
TDRD12	A0A498L851		adck3	A0A498LD68		vapa	A0A498MCT5		vim	A0A498MWX7		pcbp2	A0A498LAX0		tcp1	A0A498L2V9		COPS6	A0A498MS62		pls3	A0A498MZT6		ube2l3	A0A498LC94		sptan1	A0A498LWN5		psmd2	A0A498MHT8		sptan1	A0A498LWN5		tcp1	A0A498L2V9		fscn1	A0A498LAK0		EHBP1L1	A0A498LMU5		pter	A0A498NZP2		idh2	A0A498LB05
mkl2	A0A498L873		C6orf58	A0A498LD72		prps1	A0A498MZJ1		ina	A0A498LBX2		atp6v1b2	A0A498MKC1		EIF3C	A0A498MRL6		ugp2	A0A498NFB1		ppard	A0A498NF37		aldh7a1	A0A498M088		tmed2	A0A498N739		atp1a3	A0A498LG80		shmt2	A0A498N951		EIF3C	A0A498MRL6		syncrip	A0A498LFA4		ppp2r1b	A0A498MWR2		parva	A0A498M9A8		pdia3	A0A498MDR7
arhgap17	A0A498L885		hmgb2	A0A498LD75		rpl22	A0A498MSK2		ppp1r10	A0A498MTQ7		eif2s3	A0A498LEC0		pgk1	A0A498LZY5		mdh1	A0A498LUN9		dhx9	A0A498MI27		psmd2	A0A498MHT8		ube2l3	A0A498LC94		psmc4	A0A498NK57		csnk2b	A0A498MJ87		pgk1	A0A498LZY5		HNRNPR	A0A498M4Z7		ACTR3	A0A498P3D0		PTPRD	A0A498MQA6		txndc5	A0A498NBH4
rpl10	A0A498L8B5		vta1	A0A498LDA8		NCBP1	A0A498N4T4		rab11a	A0A498MBF7		aldoc	A0A498M0I3		syncrip	A0A498LFA4		ran	A0A498M343		hsdl2	A0A498MPQ6		atp1a3	A0A498LG80		aldh7a1	A0A498M088		copb2	A0A498L4Z1		ube2l3	A0A498LC94		syncrip	A0A498LFA4		ckb	A0A498MSZ6		psmc1	A0A498MFP7		ptprf	A0A498N226		crabp1	A0A498LAL7
lcmt1	A0A498L8C2		ndufs5	A0A498LDC1		snx29	A0A498L965		cisd1	A0A498N8E5		atp2a3	A0A498LYA4		HNRNPR	A0A498M4Z7		gdi2	A0A498MEQ4		RPS3A	A0A498LV15		nampt	A0A498NA34		psmd2	A0A498MHT8		nampt	A0A498NA34		aldh7a1	A0A498M088		HNRNPR	A0A498M4Z7		u2af1	A0A498LY45		slc25a3	A0A498NRX4		isoc1	A0A498M060		prelp	A0A498MSP0
dtymk	A0A498L8C8		ppil1	A0A498LDE1		sfxn1	A0A498LYC7		ppif	A0A498LM82		atp2a1	A0A498M1A1		ckb	A0A498MSZ6		psmc2	A0A498MEA3		rps12	A0A498L6L1		acly	A0A498LWG6		atp1a3	A0A498LG80		HSP90AA1	A0A498NTH7		atp1a3	A0A498LG80		eif3b	A0A498L933		gps1	A0A498NIJ4		slc25a13	A0A498N6M3		serpinc1	A0A498MH64		aco2	A0A498L8V2
arfgef2	A0A498L8D0		pdia6	A0A498LDE8		ndufv1	A0A498LWS5		tpi1	A0A498N8T4		myh11	A0A498NNZ3		eif3b	A0A498L933		pygm	A0A498MJP2		ckmt2	A0A498MJE0		HSP90AA1	A0A498NTH7		acly	A0A498LWG6		strbp	A0A498MJX3		psmc4	A0A498NK57		gnb2l1	A0A498M5K9		gnb2l1	A0A498M5K9		pgm1	A0A498NUJ2		ap1b1	A0A498NK81		dld	A0A498LAH2
amfr	A0A498L8D7		gnat1	A0A498LDI3		tcp1	A0A498L2V9		coro1c	A0A498NGB7		lcp1	A0A498MAX9		u2af1	A0A498LY45		RHOB	A0A498N0J0		gmds	A0A498MX26		fkbp2	A0A498N4H0		HSP90AA1	A0A498NTH7		hsp90b1	A0A498M8E6		copb2	A0A498L4Z1		SLC25A6	A0A498LHT6		ddx1	A0A498LFM1		ptbp1	A0A498LJP8		hapln3	A0A498MJW1		serpinc1	A0A498MH64
ATG101	A0A498L8E1		arpc5	A0A498LDJ8		EIF3C	A0A498MRL6		rpl7a	A0A498LPH1		pls3	A0A498MZT6		gnb2l1	A0A498M5K9		psmd7	A0A498NJ90		slc25a5	A0A498N9E0		strbp	A0A498MJX3		strbp	A0A498MJX3		tmed2	A0A498N739		HSP90AA1	A0A498NTH7		eif4a1	A0A498MY66		SLC25A6	A0A498LHT6		hnrnpa3	A0A498LJ97		sdcbp	A0A498LUF9		hspg2	A0A498LVR7
slc6a17	A0A498L8G0		HPCAL1	A0A498LDM3		fscn1	A0A498LAK0		tufm	A0A498NTL2		afg3l2	A0A498MHN6		ddx1	A0A498LFM1		rps5	A0A498LAX2		slc25a4	A0A498L8K0		hsp90b1	A0A498M8E6		hsp90b1	A0A498M8E6		gps1	A0A498NIJ4		fkbp2	A0A498N4H0		eif4a2	A0A498NUZ0		pfkp	A0A498L4B7		vdac1	A0A498N8F6		serpinb1	A0A498NBE7		sccpdh	A0A498N3L1
agxt	A0A498L8H1		dhcr24	A0A498LDP8		ahcyl1	A0A498N8Y0		pgam2	A0A498N416		copb1	A0A498MP80		SLC25A6	A0A498LHT6		mdh2	A0A498L7R5		SLC25A6	A0A498LHT6		dlg2	A0A498M390		gps1	A0A498NIJ4		cct5	A0A498LK15		strbp	A0A498MJX3		eif4a3	A0A498MNF1		eif4a3	A0A498MNF1		vdac2	A0A498P5M2		mmp2	A0A498MP00		papln	A0A498N304
ccdc149	A0A498L8J1		bax	A0A498LDQ3		syncrip	A0A498LFA4		cct5	A0A498LK15		ppard	A0A498NF37		eif4a1	A0A498MY66		erp44	A0A498NEK6		ppp2r1b	A0A498MWR2		dlg3	A0A498LL25		cct5	A0A498LK15		prph	A0A498M1K6		hsp90b1	A0A498M8E6		sptan1	A0A498LWN5		eif4a2	A0A498NUZ0		mutyh	A0A498NR65		mst1	A0A498L8J5		cd59	A0A498MK06
mst1	A0A498L8J5		flii	A0A498LDS4		HNRNPR	A0A498M4Z7		dut	A0A498MAI2		ran	A0A498M343		eif4a2	A0A498NUZ0		prkaa1	A0A498LRJ7		slc25a3	A0A498NRX4		tmed2	A0A498N739		prph	A0A498M1K6		des	A0A498NNZ4		tmed2	A0A498N739		shmt2	A0A498N951		eif4a1	A0A498MY66		rpl30	A0A498N016		c3	A0A498N9Y6		col10a1	A0A498M906
acp6	A0A498L8J9		add3	A0A498LDW5		ckb	A0A498MSZ6		rpl11	A0A498N3H4		hsdl2	A0A498MPQ6		eif4a3	A0A498MNF1		acss2	A0A498LU80		slc25a13	A0A498N6M3		gps1	A0A498NIJ4		des	A0A498NNZ4		nefm	A0A498NC53		gps1	A0A498NIJ4		atad3a	A0A498MCP4		sptan1	A0A498LWN5		ctnnb1	A0A498LCC7		capn11	A0A498LZE6		klhl15	A0A498LJN2
wdr17	A0A498L8K6		sar1b	A0A498LDZ5		eif3b	A0A498L933		flnc	A0A498NCY2		map2k4	A0A498NHE1		sptan1	A0A498LWN5		atp6v1a	A0A498NKE4		pgm1	A0A498NUJ2		cct5	A0A498LK15		nefm	A0A498NC53		vim	A0A498MWX7		cct5	A0A498LK15		csnk2b	A0A498MJ87		csnk2b	A0A498MJ87		rras	A0A498NPH6		pgm1	A0A498NUJ2		tmem214	A0A498LN85
ampd2	A0A498L8L2		ggct	A0A498LE09		gps1	A0A498NIJ4		eno3	A0A498LJB6		map2k2	A0A498NGW6		atad3a	A0A498MCP4		aco2	A0A498L8V2		CLTCL1	A0A498NHX3		prph	A0A498M1K6		ina	A0A498LBX2		ina	A0A498LBX2		prph	A0A498M1K6		ube2l3	A0A498LC94		ube2l3	A0A498LC94		tub	A0A498MYE8		fh	A0A498LTT9
cpped1	A0A498L8L8		pvalb	A0A498LE30		gnb2l1	A0A498M5K9		mtap	A0A498NXD1		clta	A0A498MFE1		csnk2b	A0A498MJ87		prkar1a	A0A498N2L8		vdac1	A0A498N8F6		des	A0A498NNZ4		vim	A0A498MWX7		rab11a	A0A498MBF7		des	A0A498NNZ4		aldh7a1	A0A498M088		aldh7a1	A0A498M088		gorasp2	A0A498P6G7		gdi2	A0A498MEQ4
SMPD2	A0A498L8M4		nccrp1	A0A498LE53		SLC25A6	A0A498LHT6		RPL27A	A0A498M799		CLTB	A0A498N4R1		ube2l3	A0A498LC94		gps1	A0A498NIJ4		vdac2	A0A498P5M2		nefm	A0A498NC53		ppp1r10	A0A498MTQ7		cisd1	A0A498N8E5		nefm	A0A498NC53		psmd2	A0A498MHT8		psmd2	A0A498MHT8		ndufs1	A0A498NNW4		got1	A0A498LHI8
inpp5d	A0A498L8Q0		cspg4	A0A498LE97		eif4a3	A0A498MNF1		pcbp2	A0A498LAX0		cstf2	A0A498NBW5		aldh7a1	A0A498M088		btf3	A0A498NED9		rpl30	A0A498N016		vim	A0A498MWX7		rab11a	A0A498MBF7		stag2	A0A498NTM3		vim	A0A498MWX7		atp1a3	A0A498LG80		atp1a3	A0A498LG80		rpl10	A0A498L8B5		psma8	A0A498M831
mettl7a	A0A498L8S6		eif2s3	A0A498LEC0		eif4a2	A0A498NUZ0		C18orf32	A0A498N8N2		RPS3A	A0A498LV15		psmd2	A0A498MHT8		ddx3x	A0A498N489		ctnnb1	A0A498LCC7		ina	A0A498LBX2		snrpb	A0A498NF52		tnpo3	A0A498MFC2		ina	A0A498LBX2		psmc4	A0A498NK57		psmc4	A0A498NK57		prps1	A0A498MZJ1		fabp3	A0A498MWH4
atg4b	A0A498L8T0		fgg	A0A498LEH5		eif4a1	A0A498MY66		atp6v1b2	A0A498MKC1		sdha	A0A498M1C7		atp1a3	A0A498LG80		pgk1	A0A498LZY5		gorasp2	A0A498P6G7		ppp1r10	A0A498MTQ7		cisd1	A0A498N8E5		tpi1	A0A498N8T4		rab11a	A0A498MBF7		HSP90AA1	A0A498NTH7		HSP90AA1	A0A498NTH7		rpl27	A0A498L707		fabp7	A0A498LTJ0
sts	A0A498L8T2		uroc1	A0A498LEI0		sptan1	A0A498LWN5		DYNC1H1	A0A498LJD8		rps12	A0A498L6L1		nampt	A0A498NA34		prps1	A0A498MZJ1		ndufs1	A0A498NNW4		rab11a	A0A498MBF7		tpi1	A0A498N8T4		rpl7a	A0A498LPH1		cisd1	A0A498N8E5		fkbp2	A0A498N4H0		fkbp2	A0A498N4H0		rab10	A0A498NK69		col6a1	A0A498NRY6
trrap	A0A498L8T9		ckmt2	A0A498LEJ3		dlg3	A0A498LL25		eif2s3	A0A498LEC0		ckmt2	A0A498MJE0		HSP90AA1	A0A498NTH7		hagh	A0A498MFI3		upb1	A0A498MHN3		cisd1	A0A498N8E5		rpl7a	A0A498LPH1		tufm	A0A498NTL2		rab18	A0A498NTT7		strbp	A0A498MJX3		strbp	A0A498MJX3		ppp2cb	A0A498LUI2		tf	A0A498N853
slc16a6	A0A498L8U3		rpa3	A0A498LES4		dlg2	A0A498M390		atp2a1	A0A498NW58		SLC25A6	A0A498LHT6		fkbp2	A0A498N4H0		farsb	A0A498NU48		arpc2	A0A498MY97		tpi1	A0A498N8T4		rcn1	A0A498NFK2		pgam2	A0A498N416		tpi1	A0A498N8T4		hsp90b1	A0A498M8E6		hsp90b1	A0A498M8E6		ppp2ca	A0A498M0I0		postn	A0A498LEZ7
aco2	A0A498L8V2		txndc17	A0A498LEU3		shmt2	A0A498N951		atp2a3	A0A498LYA4		cse1l	A0A498MSB4		hsp90b1	A0A498M8E6		uba1	A0A498MPV8		YBX2	A0A498M3Z6		rpl7a	A0A498LPH1		tufm	A0A498NTL2		hkdc1	A0A498N424		tufm	A0A498NTL2		glod4	A0A498L6A7		cstf2	A0A498NBW5		polr1a	A0A498N4E6		tgfbi	A0A498NUS4
cog2	A0A498N102		aldh9a1	A0A498LEV5		atad3a	A0A498MCP4		RDX	A0A498NQF9		EHBP1L1	A0A498LMU5		cstf2	A0A498NBW5		SLC25A6	A0A498LHT6		ybx1	A0A498LW12		tufm	A0A498NTL2		pgam2	A0A498N416		tcp1	A0A498L2V9		pgam2	A0A498N416		tmed2	A0A498N739		eif3a	A0A498L5W0		rps18	A0A498MD37		lum	A0A498ML95
cpe	A0A498L8V7		postn	A0A498LEZ7		csnk2b	A0A498MJ87		tagap	A0A498NFZ5		ppp2r1b	A0A498MWR2		tmed2	A0A498N739		sfxn3	A0A498MZB8		rpl27	A0A498L707		pgam2	A0A498N416		hkdc1	A0A498N424		samm50	A0A498LMW5		EML4	A0A498MVJ2		rps10	A0A498LD02		usp39	A0A498N859		tmed10	A0A498NK70		apoe	A0A498LT17
rcc1	A0A498L913		RAB31	A0A498LEZ9		ube2l3	A0A498LC94		ACTR3	A0A498P3D0		slc25a3	A0A498NRX4		slc30a9	A0A498N4T9		ndufv1	A0A498LWS5		rab10	A0A498NK69		rpl11	A0A498N3H4		rpl11	A0A498N3H4		farsb	A0A498NU48		samm50	A0A498LMW5		gps1	A0A498NIJ4		glod4	A0A498L6A7		pabpn1	A0A498N001		cfi	A0A498LLL2
acsl6	A0A498L914		sod1	A0A498LF02		aldh7a1	A0A498M088		rps23	A0A498LR94		PRKAR2B	A0A498MN60		eif3e	A0A498LFI9		csnk2b	A0A498MJ87		COPS6	A0A498MS62		farsb	A0A498NU48		samm50	A0A498LMW5		flnc	A0A498NCY2		farsb	A0A498NU48		slc3a1	A0A498N651		tmed2	A0A498N739		ahcy	A0A498N5E1		c9	A0A498LPL8
SV2A	A0A498L915		lancl2	A0A498LF21		psmd2	A0A498MHT8		lcp1	A0A498MAX9		slc25a13	A0A498N6M3		gps1	A0A498NIJ4		hk1	A0A498N0I6		tmed10	A0A498NK70		flnc	A0A498NCY2		flnc	A0A498NCY2		mtap	A0A498NXD1		flnc	A0A498NCY2		ppm1a	A0A498MDX5		myo6	A0A498MBZ1		ran	A0A498M343		fgg	A0A498LEH5
SPIN1	A0A498L967		loxl1	A0A498LF75		atp1a3	A0A498LG80		pls3	A0A498MZT6		rps4x	A0A498NLU9		cct5	A0A498LK15		ap2a1	A0A498NQ62		copa	A0A498LPI1		YY2	A0A498MMD1		clic1	A0A498MCJ8		RPL27A	A0A498M799		mtap	A0A498NXD1		cct5	A0A498LK15		eif5b	A0A498N8A7		gdi2	A0A498MEQ4		myh7b	A0A498MFA4
C17orf53	A0A498L9A3		syncrip	A0A498LFA4		psmc4	A0A498NK57		ppard	A0A498NF37		pgm1	A0A498NUJ2		prph	A0A498M1K6		ppp2r5c	A0A498LB61		tm9sf2	A0A498L371		dnm1l	A0A498P3I9		dnm1l	A0A498P3I9		pcbp2	A0A498LAX0		RPL27A	A0A498M799		ina	A0A498LBX2		cct5	A0A498LK15		rpl13	A0A498NJ12		cdh2	A0A498M627
dnajc3	A0A498NDC8		pkd1l1	A0A498LFD6		copb2	A0A498L4Z1		EIF5A	A0A498MEW8		pak1	A0A498NT33		des	A0A498NNZ4		ppp2r5d	A0A498MM69		rps5	A0A498LAX2		mtap	A0A498NXD1		RPL27A	A0A498M799		C18orf32	A0A498N8N2		pcbp2	A0A498LAX0		vim	A0A498N8B5		prph	A0A498M1K6		rpl9	A0A498MXQ4		plg	A0A498MP37
phactr4	A0A498L9H5		gpd1l	A0A498LFE6		nampt	A0A498NA34		vcp	A0A498MPP7		pak2	A0A498MHP4		nefm	A0A498NC53		rpl36	A0A498P165		atad2	A0A498MTZ4		psmc4	A0A498NK57		pcbp2	A0A498LAX0		atp6v1b2	A0A498MKC1		C18orf32	A0A498N8N2		prph	A0A498M1K6		des	A0A498NNZ4		pygm	A0A498MJP2		f8	A0A498NEE6
rbm15	A0A498L9J0		tmed4	A0A498LFE7		HSP90AA1	A0A498NTH7		hsdl2	A0A498MPQ6		vdac1	A0A498N8F6		vim	A0A498MWX7		sparc	A0A498NUJ1		plekhm3	A0A498N4I9		RPL27A	A0A498M799		atp6v1b2	A0A498MKC1		vps29	A0A498NKF0		atp6v1b2	A0A498MKC1		des	A0A498NNZ4		nefm	A0A498NC53		psmc2	A0A498MEA3		cetp	A0A498MH61
COQ7	A0A498L9L3		purb	A0A498LFH6		fkbp2	A0A498N4H0		clta	A0A498MFE1		vdac2	A0A498P5M2		ina	A0A498LBX2		ddx1	A0A498LFM1		ran	A0A498M343		pcbp2	A0A498LAX0		DYNC1H1	A0A498LJD8		eif2s3	A0A498LEC0		wdr34	A0A498LXI4		nefm	A0A498NC53		ina	A0A498LBX2		mdh2	A0A498L7R5		agt	A0A498N0U2
MALSU1	A0A498L9N2		eif3e	A0A498LFI9		strbp	A0A498MJX3		CLTB	A0A498N4R1		rpl30	A0A498N016		rab11a	A0A498MBF7		aifm1	A0A498NF81		gdi1	A0A498LTB6		C18orf32	A0A498N8N2		vps29	A0A498NKF0		aldoc	A0A498M0I3		set	A0A498NHZ1		rab11a	A0A498MBF7		vim	A0A498MWX7		erp44	A0A498NEK6		angptl7	A0A498LVX8
pop1	A0A498L9N6		PTGFRN	A0A498LFK1		hsp90b1	A0A498M8E6		ndufs8	A0A498MMX0		gnb2l1	A0A498M5K9		cisd1	A0A498N8E5		gapdhs	A0A498L4F1		gdi2	A0A498MEQ4		atp6v1b2	A0A498MKC1		eif2s3	A0A498LEC0		atp2a1	A0A498M1A1		DYNC1H1	A0A498LJD8		cisd1	A0A498N8E5		rab11a	A0A498MBF7		smarcc1	A0A498NKA7		TRIP10	A0A498L7Z4
fgd6	A0A498L9P7		eif4e	A0A498LFK8		tmed2	A0A498N739		RPS3A	A0A498LV15		gorasp2	A0A498P6G7		tpi1	A0A498N8T4		eef2	A0A498NN34		eef1b2	A0A498NP09		wdr34	A0A498LXI4		aldoc	A0A498M0I3		atp2a3	A0A498LYA4		capza1	A0A498MN53		rab18	A0A498NTT7		cisd1	A0A498N8E5		nsf	A0A498NMX0		C6orf58	A0A498LD72
ndufa12	A0A498L9Q3		ndrg2	A0A498LFM0		slc30a9	A0A498N4T9		sdha	A0A498M1C7		xpo1	A0A498NBE6		sfxn1	A0A498LYC7		cct3	A0A498NIH7		eef1d	A0A498NSH4		set	A0A498NHZ1		atp2a1	A0A498M1A1		tagap	A0A498NFZ5		rps23	A0A498LR94		tpi1	A0A498N8T4		tnpo3	A0A498MFC2		acss2	A0A498LU80		rbp4	A0A498LVA3
itih2	A0A498L9R8		dbi	A0A498LFM5		slc3a1	A0A498N651		rps12	A0A498L6L1		arpc2	A0A498MY97		rcn1	A0A498NFK2		rpl7a	A0A498LPH1		rpl13	A0A498NJ12		DYNC1H1	A0A498LJD8		atp2a3	A0A498LYA4		RDX	A0A498NQF9		eif2s3	A0A498LEC0		coro1c	A0A498NGB7		tpi1	A0A498N8T4		atp6v1a	A0A498NKE4		h6pd	A0A498LNH7
cpm	A0A498L9T1		plekhf2	A0A498LFM9		ppm1a	A0A498MDX5		ckmt2	A0A498MJE0		YBX2	A0A498M3Z6		tufm	A0A498NTL2		npepps	A0A498L5J2		pygm	A0A498MJP2		vps29	A0A498NKF0		tagap	A0A498NFZ5		rps23	A0A498LR94		atp2a1	A0A498M1A1		rcn1	A0A498NFK2		rpl7a	A0A498LPH1		aco2	A0A498L8V2		shbg	A0A498LBR0
pacsin1	A0A498L9V5		ppm1f	A0A498LFN2		cct5	A0A498LK15		EHBP1L1	A0A498LMU5		ybx1	A0A498LW12		pgam2	A0A498N416		ank3	A0A498NCQ5		RHOB	A0A498N0J0		capza1	A0A498MN53		RDX	A0A498NQF9		erlin1	A0A498NDY9		atp2a3	A0A498LYA4		tufm	A0A498NTL2		tufm	A0A498NTL2		stom	A0A498NKN9		blmh	A0A498LH75
usp24	A0A498LFW1		emc2	A0A498LFR4		prph	A0A498M1K6		ppp2r1b	A0A498MWR2		eif3a	A0A498L5W0		hkdc1	A0A498N424		ANK2	A0A498MI53		MAT1A	A0A498MSY9		myo1f	A0A498NRY4		rps23	A0A498LR94		pls3	A0A498MZT6		erlin1	A0A498NDY9		pgam2	A0A498N416		pgam2	A0A498N416		btf3	A0A498NED9		HEPHL1	A0A498LGH5
pacsin2	A0A498NRM4		mylk	A0A498LFS7		des	A0A498NNZ4		slc25a3	A0A498NRX4		rab10	A0A498NK69		dut	A0A498MAI2		agrn	A0A498N4Y4		psmd7	A0A498NJ90		eif2s3	A0A498LEC0		enah	A0A498M036		lcp1	A0A498MAX9		lcp1	A0A498MAX9		rpl11	A0A498N3H4		dut	A0A498MAI2		ddx3x	A0A498N489		habp2	A0A498NEC0
SCYL2	A0A498L9W6		glrx3	A0A498LFT5		nefm	A0A498NC53		slc25a13	A0A498N6M3		eif3d	A0A498NJK1		rpl11	A0A498N3H4		cp	A0A498MX98		rpl9	A0A498MXQ4		atp2a3	A0A498LYA4		erlin1	A0A498NDY9		afg3l2	A0A498MHN6		pls3	A0A498MZT6		samm50	A0A498LMW5		rpl11	A0A498N3H4		hagh	A0A498MFI3		rpa1	A0A498LHR7
cmc1	A0A498L9Y5		mapk1	A0A498LFW3		vim	A0A498MWX7		slc25a12	A0A498P3L6		polr1a	A0A498N4E6		samm50	A0A498LMW5		aars	A0A498MDH5		mdh2	A0A498L7R5		atp2a1	A0A498M1A1		lcp1	A0A498MAX9		acly	A0A498LWG6		rps12	A0A498L6L1		farsb	A0A498NU48		farsb	A0A498NU48		farsb	A0A498NU48		lta4h	A0A498N9T1
CNDP1	A0A498L9Z2		serpinf1	A0A498LG29		ina	A0A498LBX2		ptbp1	A0A498LJP8		nras	A0A498LVZ1		farsb	A0A498NU48		fermt2	A0A498N232		erp44	A0A498NEK6		RDX	A0A498NQF9		pls3	A0A498MZT6		ppard	A0A498NF37		RPS3A	A0A498LV15		flnc	A0A498NCY2		flnc	A0A498NCY2		uba1	A0A498MPV8		tbc1d1	A0A498L925
slc9a3r1	A0A498LA10		rap2a	A0A498LG39		rab11a	A0A498MBF7		hnrnpa3	A0A498LJ97		kras	A0A498MKW9		flnc	A0A498NCY2		nars	A0A498MW09		psmd1	A0A498MUW2		tagap	A0A498NFZ5		rps12	A0A498L6L1		ran	A0A498M343		ppard	A0A498NF37		pck2	A0A498N0Y6		dnm1l	A0A498P3I9		hnrnpa1	A0A498LSH0		pgm2	A0A498N046
GMFG	A0A498L6I2		cops7a	A0A498LG70		cisd1	A0A498N8E5		vdac1	A0A498N8F6		tmed10	A0A498NK70		dnm1l	A0A498P3I9		tial1	A0A498NXY1		nras	A0A498LVZ1		rps23	A0A498LR94		ppard	A0A498NF37		hsdl2	A0A498MPQ6		EIF5A	A0A498MEW8		pck1	A0A498NC69		mtap	A0A498NXD1		csnk2b	A0A498MJ87		itih2	A0A498L9R8
gmfb	A0A498LA25		atp1a3	A0A498LG80		eef1g	A0A498NTK4		vdac2	A0A498P5M2		atp6v1d	A0A498NK38		mtap	A0A498NXD1		tia1	A0A498MJQ9		acss2	A0A498LU80		erlin1	A0A498NDY9		EIF5A	A0A498MEW8		map2k4	A0A498NHE1		ran	A0A498M343		mtap	A0A498NXD1		RPL27A	A0A498M799		eef2	A0A498NN34		f10	A0A498MBE1
ethe1	A0A498LA32		sri	A0A498LG84		rab18	A0A498NTT7		mutyh	A0A498NR65		gapdhs	A0A498L4F1		RPL27A	A0A498M799		nsf	A0A498NMX0		atp6v1a	A0A498NKE4		pls3	A0A498MZT6		dhx9	A0A498MI27		map2k2	A0A498NGW6		hsdl2	A0A498MPQ6		RPL27A	A0A498M799		pcbp2	A0A498LAX0		psmb7	A0A498LKB6		gpx1	A0A498NS09
nsfl1c	A0A498LA40		rtn3	A0A498LGC7		tnpo3	A0A498MFC2		ctnnb1	A0A498LCC7		plekhm3	A0A498N4I9		pcbp2	A0A498LAX0		atp6v1g1	A0A498M939		aco2	A0A498L8V2		lcp1	A0A498MAX9		PRKDC	A0A498M8N7		ndufs8	A0A498MMX0		map2k2	A0A498NGW6		pcbp2	A0A498LAX0		C18orf32	A0A498N8N2		mgat4b	A0A498N4K6		cat	A0A498N4M9
cyr61	A0A498LAB0		mat2b	A0A498LGG2		tpi1	A0A498N8T4		gorasp2	A0A498P6G7		ahcy	A0A498N5E1		C18orf32	A0A498N8N2		rps9	A0A498NIR7		prkar1a	A0A498N2L8		rps12	A0A498L6L1		hsdl2	A0A498MPQ6		cstf2	A0A498NBW5		ndufs8	A0A498MMX0		C18orf32	A0A498N8N2		atp6v1b2	A0A498MKC1		clgn	A0A498MT53		serpind1	A0A498NI15
ppib	A0A498LAB9		rab39b	A0A498LGI2		rpl7a	A0A498LPH1		xpo1	A0A498NBE6		gdi2	A0A498MEQ4		atp6v1b2	A0A498MKC1		lsm7	A0A498NBE3		cpsf6	A0A498N6E3		RPS3A	A0A498LV15		map2k4	A0A498NHE1		top1	A0A498NK94		ahcyl1	A0A498N8Y0		atp6v1b2	A0A498MKC1		rps23	A0A498LR94		rpl36	A0A498P165		col6a6	A0A498LQS3
WDR44	A0A498LAC3		crip1	A0A498LGM3		tufm	A0A498NTL2		rpl10	A0A498L8B5		eef1b2	A0A498NP09		wdr34	A0A498LXI4		psmd3	A0A498M9B4		btf3	A0A498NED9		ppard	A0A498NF37		map2k2	A0A498NGW6		RPS3A	A0A498LV15		cstf2	A0A498NBW5		wdr34	A0A498LXI4		eif2s3	A0A498LEC0		me1	A0A498NJ16		nprl3	A0A498NFT9
depdc7	A0A498LAE0		pura	A0A498LGN8		pgam2	A0A498N416		prps1	A0A498MZJ1		eef1d	A0A498NSH4		set	A0A498NHZ1		rab11a	A0A498MBF7		ddx3x	A0A498N489		EIF5A	A0A498MEW8		ndufs8	A0A498MMX0		sdha	A0A498M1C7		sdha	A0A498M1C7		set	A0A498NHZ1		atp2a1	A0A498NW58		cs	A0A498LAX4		btd	A0A498LYJ5
myo1c	A0A498LHJ3		parp1	A0A498LGP1		hkdc1	A0A498N424		YBX2	A0A498M3Z6		rpl13	A0A498NJ12		vps29	A0A498NKF0		rab25	A0A498NRK4		pgk1	A0A498LZY5		ran	A0A498M343		cstf2	A0A498NBW5		rps12	A0A498L6L1		ckmt2	A0A498MJE0		DYNC1H1	A0A498LJD8		atp2a3	A0A498LYA4		tcea2	A0A498LS47		apom	A0A498NSF4
ppp2cb	A0A498LUI2		ncald	A0A498LGU7		rpl11	A0A498N3H4		ybx1	A0A498LW12		psmc2	A0A498MEA3		rps23	A0A498LR94		arpc4	A0A498MR69		eef2	A0A498NN34		dhx9	A0A498MI27		RPS3A	A0A498LV15		fasn	A0A498LY61		gmds	A0A498MX26		rps23	A0A498LR94		RDX	A0A498NQF9		DDB1	A0A498LQ23		mgat4d	A0A498LVP1
ppp2ca	A0A498M0I0		sept6	A0A498LGV3		samm50	A0A498LMW5		rpl27	A0A498L707		rpl9	A0A498MXQ4		eif2s3	A0A498LEC0		rab10	A0A498NK69		hagh	A0A498MFI3		hsdl2	A0A498MPQ6		sdha	A0A498M1C7		ckmt2	A0A498MJE0		ndufv1	A0A498LWS5		eif2s3	A0A498LEC0		tagap	A0A498NFZ5		erh	A0A498LGY3		arhgdia	A0A498LI33
cmtr2	A0A498MMR2		snf8	A0A498LGX1		psmc2	A0A498MEA3		rab10	A0A498NK69		pygm	A0A498MJP2		gnb2	A0A498MV49		psma5	A0A498NQY9		kras	A0A498MKW9		map2k4	A0A498NHE1		ckmt2	A0A498MJE0		rbbp4	A0A498MLJ2		EHBP1L1	A0A498LMU5		atp2a3	A0A498LYA4		erlin1	A0A498NDY9		rcc2	A0A498LBD4		ankrd55	A0A498LW93
wdr47	A0A498LAG4		ckm	A0A498LGX8		farsb	A0A498NU48		rab8a	A0A498N908		mpp6	A0A498N3F2		atp2a3	A0A498LYA4		myl4	A0A498MJ94		uba1	A0A498MPV8		CLTB	A0A498N4R1		gmds	A0A498MX26		gmds	A0A498MX26		ppp2r1b	A0A498MWR2		atp2a1	A0A498M1A1		lcp1	A0A498MAX9		RPL37A	A0A498MNH9		cryz	A0A498P4F6
rpp14	A0A498LAH0		erh	A0A498LGY3		flnc	A0A498NCY2		eif3d	A0A498NJK1		MAT1A	A0A498MSY9		atp2a1	A0A498NW58		fbxo22	A0A498LC85		sfxn3	A0A498MZB8		clta	A0A498MFE1		mutyh	A0A498NR65		cse1l	A0A498MSB4		slc25a3	A0A498NRX4		erlin1	A0A498NDY9		pls3	A0A498MZT6		luc7l3	A0A498LY40		fah	A0A498NA62
gosr2	A0A498LAH1		prkag1	A0A498LH41		dnm1l	A0A498P3I9		polr1a	A0A498N4E6		psmd7	A0A498NJ90		eif5b	A0A498N8A7		lactb	A0A498MZD1		csnk2b	A0A498MJ87		ndufs8	A0A498MMX0		cse1l	A0A498MSB4		EHBP1L1	A0A498LMU5		slc25a13	A0A498N6M3		lcp1	A0A498MAX9		cdk1	A0A498NU75		cct3	A0A498NIH7		LRG1	A0A498M2U1
dld	A0A498LAH2		LGALS3	A0A498LH57		mtap	A0A498NXD1		rps18	A0A498MD37		ipo5	A0A498NA00		erlin1	A0A498NDY9		xpo7	A0A498MMK2		ap2a1	A0A498NQ62		sf3a2	A0A498MZH9		EHBP1L1	A0A498LMU5		ppp2r1b	A0A498MWR2		pgm1	A0A498NUJ2		pls3	A0A498MZT6		ppard	A0A498NF37		slc9b2	A0A498ML40		alad	A0A498MB86
aspn	A0A498LAH9		cct8	A0A498LH60		tagap	A0A498NFZ5		tmed10	A0A498NK70		mdh2	A0A498L7R5		pls3	A0A498MZT6		psmc3	A0A498MJ03		pdcd6ip	A0A498NAQ7		ahcyl1	A0A498N8Y0		ppp2r1b	A0A498MWR2		slc25a3	A0A498NRX4		ptbp1	A0A498LJP8		rps12	A0A498L6L1		EIF5A	A0A498MEW8		npepps	A0A498L5J2		vtn	A0A498LQ67
znf592	A0A498LAI4		blmh	A0A498LH75		RPL27A	A0A498M799		copa	A0A498LPI1		erp44	A0A498NEK6		lcp1	A0A498MAX9		rpl8	A0A498N3G7		rpl36	A0A498P165		cstf2	A0A498NBW5		slc25a3	A0A498NRX4		PRKAR2B	A0A498MN60		vdac1	A0A498N8F6		ndufa10	A0A498NBA5		ran	A0A498M343		ank3	A0A498P2Z0		lxn	A0A498M4K7
fscn1	A0A498LAK0		ptrh2	A0A498LH90		pcbp2	A0A498LAX0		tm9sf2	A0A498L371		psmd1	A0A498MUW2		rps12	A0A498L6L1		slc25a11	A0A498M5Q7		kpna1	A0A498NRI9		sdha	A0A498M1C7		slc25a13	A0A498N6M3		slc25a13	A0A498N6M3		vdac2	A0A498P5M2		ppard	A0A498NF37		dhx9	A0A498MI27		ank2	A0A498NIJ5		ambp	A0A498MNZ5
fscn2	A0A498MVZ0		snx12	A0A498LH99		C18orf32	A0A498N8N2		kras	A0A498MKW9		nsf	A0A498NMX0		afg3l2	A0A498MHN6		rps28	A0A498P454		EIF4G3	A0A498LQD7		ckmt2	A0A498MJE0		pgm1	A0A498NUJ2		pgm1	A0A498NUJ2		mutyh	A0A498NR65		EIF5A	A0A498MEW8		hsdl2	A0A498MPQ6		agrn	A0A498N4Y4		c5	A0A498MMD9
crabp1	A0A498LAL7		crk	A0A498LHE2		atp6v1b2	A0A498MKC1		nras	A0A498LVZ1		gnai1	A0A498LVT1		acly	A0A498LWG6		nedd8	A0A498MPI0		vps35	A0A498MDH6		gmds	A0A498MX26		ptbp1	A0A498LJP8		vdac1	A0A498N8F6		rpl30	A0A498N016		dhx9	A0A498MI27		map2k2	A0A498NGW6		cp	A0A498MX98		AHSG	A0A498N4I5
NOP9	A0A498LAL8		shoc2	A0A498LHG9		wdr34	A0A498LXI4		psmd2	A0A498M7I3		ap2a1	A0A498NQ62		copb1	A0A498MP80		hsp90b1	A0A498M8E6		mcm3ap	A0A498NI93		cse1l	A0A498MSB4		hnrnpa3	A0A498LJ97		vdac2	A0A498P5M2		rras	A0A498NPH6		hsdl2	A0A498MPQ6		CLTB	A0A498N4R1		gatm	A0A498MHC3		gpx3	A0A498LWG8
macf1	A0A498LAN4		dhrs13	A0A498LHI3		set	A0A498NHZ1		ahcy	A0A498N5E1		acss2	A0A498LU80		cdk1	A0A498NU75		ank1	A0A498NBP4		copb2	A0A498L4Z1		EHBP1L1	A0A498LMU5		pak1	A0A498NT33		polr2a	A0A498LS48		tub	A0A498MYE8		map2k4	A0A498NHE1		clta	A0A498MFE1		fermt2	A0A498N232		pbld	A0A498N6F0
CPQ	A0A498LFY9		got1	A0A498LHI8		vps29	A0A498NKF0		tcp1	A0A498L2V9		myh9	A0A498MHH0		ndufa10	A0A498NBA5		wdr34	A0A498LXI4		prkacb	A0A498NE56		gnb2	A0A498MV49		pak2	A0A498MHP4		mutyh	A0A498NR65		gorasp2	A0A498P6G7		map2k2	A0A498NGW6		ndufs8	A0A498MMX0		sf3b1	A0A498NAS7		pfn1	A0A498LJP3
dock3	A0A498MFT2		myo1c	A0A498LHJ3		rps23	A0A498LR94		ran	A0A498M343		aco2	A0A498L8V2		RPS3A	A0A498LV15		set	A0A498NHZ1		erh	A0A498LGY3		ppp2r1b	A0A498MWR2		vdac1	A0A498N8F6		rpl30	A0A498N016		xpo1	A0A498NBE6		clta	A0A498MFE1		ahcyl1	A0A498N8Y0		rps9	A0A498NIR7		ttc25	A0A498LWD3
DOCK1	A0A498MJH4		capns1	A0A498LHL4		eif2s3	A0A498LEC0		gdi2	A0A498MEQ4		stom	A0A498NKN9		ppard	A0A498NF37		pura	A0A498ND90		pccb	A0A498P434		slc25a3	A0A498NRX4		vdac2	A0A498P5M2		vars	A0A498LBP2		ndufs1	A0A498NNW4		CLTB	A0A498N4R1		RPS3A	A0A498LV15		RHOB	A0A498N0J0		kng1	A0A498MUT8
dock4	A0A498N1S5		rpa1	A0A498LHR7		aldoc	A0A498M0I3		eef1d	A0A498NSH4		dnajc11	A0A498N2W1		EIF5A	A0A498MEW8		purb	A0A498LFH6		mbnl2	A0A498P3P4		PRKAR2B	A0A498MN60		rpl30	A0A498N016		rras	A0A498NPH6		rpl10	A0A498L8B5		ndufs8	A0A498MMX0		rps12	A0A498L6L1		strbp	A0A498MJX3		PHKA2	A0A498NR97
DOCK2	A0A498N213		appl2	A0A498LHT3		atp2a1	A0A498M1A1		eef1b2	A0A498NP09		prkar1a	A0A498N2L8		ran	A0A498M343		rpl9	A0A498MXQ4		gapdhs	A0A498L4F1		slc25a13	A0A498N6M3		rras	A0A498NPH6		tub	A0A498MYE8		ddx49	A0A498NJ09		cstf2	A0A498NBW5		ckmt2	A0A498MJE0		ilf3	A0A498NVH4		ggct	A0A498LE09
stag2	A0A498NTM3		SLC25A6	A0A498LHT6		atp2a3	A0A498LYA4		rpl13	A0A498NJ12		cpsf6	A0A498N6E3		hsdl2	A0A498MPQ6		ybx1	A0A498LW12		cct3	A0A498NIH7		pgm1	A0A498NUJ2		tub	A0A498MYE8		gorasp2	A0A498P6G7		upb1	A0A498MHN3		RPS3A	A0A498LV15		rbbp4	A0A498MLJ2		rab25	A0A498NRK4		pls1	A0A498NV44
wdr45b	A0A498LAN5		eml2	A0A498LHW8		erlin1	A0A498NDY9		prkcd	A0A498L5W8		btf3	A0A498NED9		map2k4	A0A498NHE1		ahcy	A0A498N5E1		rpl7a	A0A498LPH1		ptbp1	A0A498LJP8		gorasp2	A0A498P6G7		xpo1	A0A498NBE6		YBX2	A0A498M3Z6		sdha	A0A498M1C7		cse1l	A0A498MSB4		arpc4	A0A498MR69		clec3b	A0A498M3J2
bin2	A0A498LAU9		dcaf17	A0A498LHY4		afg3l2	A0A498MHN6		psmc2	A0A498MEA3		prps1	A0A498MZJ1		ndufs8	A0A498MMX0		cat	A0A498N4M9		gbe1	A0A498NYQ1		pak1	A0A498NT33		ndufs1	A0A498NNW4		ndufs1	A0A498NNW4		ybx1	A0A498LW12		fasn	A0A498LY61		EHBP1L1	A0A498LMU5		psma5	A0A498NQY9		pdia3	A0A498MDR7
rps5	A0A498LAX2		atp5c1	A0A498LI09		ppard	A0A498NF37		pygm	A0A498MJP2		PFKL	A0A498M7R6		sf3a2	A0A498MZH9		aldoc	A0A498M0I3		cp	A0A498MX98		vdac1	A0A498N8F6		hspa9	A0A498N369		copa	A0A498LPI1		eif3a	A0A498L5W0		aldh18a1	A0A498LMW6		pcna	A0A498MYE6		myl4	A0A498MJ94		serpinf1	A0A498LG29
cs	A0A498LAX4		hspa8	A0A498LI11		EIF5A	A0A498MEW8		mpp6	A0A498N3F2		uba1	A0A498MPV8		ahcyl1	A0A498N8Y0		mutyh	A0A498NR65		fermt2	A0A498N232		vdac2	A0A498P5M2		rpl10	A0A498L8B5		rpl10	A0A498L8B5		rpl27	A0A498L707		ckmt2	A0A498MJE0		ppp2r1b	A0A498MWR2		lactb	A0A498MZD1		clic1	A0A498MCJ8
galt	A0A498LAY2		arhgdia	A0A498LI33		ran	A0A498M343		psmd7	A0A498NJ90		hnrnpdl	A0A498LUJ4		top1	A0A498NK94		ilf2	A0A498NBZ6		aco1	A0A498MTB1		mutyh	A0A498NR65		ddx49	A0A498NJ09		YBX2	A0A498M3Z6		rab10	A0A498NK69		gmds	A0A498MX26		PRKAR2B	A0A498MN60		fbxo22	A0A498LC85		BCHE	A0A498NT31
fam206a	A0A498LAY5		c1qtnf5	A0A498LIC0		dhx9	A0A498MI27		dazap1	A0A498NJ14		hnrnpa1	A0A498LSH0		aldh18a1	A0A498LMW6		chp1	A0A498LVS8		tial1	A0A498NXY1		vars	A0A498LBP2		upb1	A0A498MHN3		ybx1	A0A498LW12		rab8a	A0A498N908		mutyh	A0A498NR65		slc25a13	A0A498N6M3		psmc3	A0A498MJ03		bcam	A0A498LRE4
pstpip1	A0A498LAZ5		TPPP2	A0A498LIE2		hsdl2	A0A498MPQ6		rpl9	A0A498MXQ4		sfxn3	A0A498MZB8		rbbp4	A0A498MLJ2		aph1a	A0A498LY90		tia1	A0A498MJQ9		rras	A0A498NPH6		arpc2	A0A498MY97		arl8a	A0A498LJJ3		eif3d	A0A498NJK1		cse1l	A0A498MSB4		pgm1	A0A498NUJ2		rpl8	A0A498N3G7		C19orf66	A0A498N6Z3
C11orf58	A0A498LAZ6		hadha	A0A498LIF2		map2k4	A0A498NHE1		mdh2	A0A498L7R5		ireb2	A0A498LII5		cse1l	A0A498MSB4		rab8a	A0A498N908		atp6v1g1	A0A498M939		tub	A0A498MYE8		prps1	A0A498MZJ1		eif3a	A0A498L5W0		aldoc	A0A498M0I3		EHBP1L1	A0A498LMU5		ptbp1	A0A498LJP8		rab8a	A0A498N908		ptx3	A0A498MTN1
idh2	A0A498LB05		plxnb2	A0A498LIG6		map2k2	A0A498NGW6		erp44	A0A498NEK6		rbbp4	A0A498MLJ2		EHBP1L1	A0A498LMU5		erlin1	A0A498NDY9		eif3b	A0A498L933		gorasp2	A0A498P6G7		eif3a	A0A498L5W0		rpl27	A0A498L707		polr1a	A0A498N4E6		gnb2	A0A498MV49		pak2	A0A498MHP4		aph1a	A0A498LY90		serpina10	A0A498MSI0
plekhm3	A0A498N4I9		rpl18a	A0A498LIH2		clta	A0A498MFE1		cdc42	A0A498MTB3		csnk2b	A0A498MJ87		ppp2r1b	A0A498MWR2		vim	A0A498N8B5		rps9	A0A498NIR7		xpo1	A0A498NBE6		rpl27	A0A498L707		rab10	A0A498NK69		COPS6	A0A498MS62		ppp2r1b	A0A498MWR2		pak1	A0A498NT33		slc25a11	A0A498M5Q7		ctsz	A0A498LKT3
sirt5	A0A498LB15		ireb2	A0A498LII5		CLTB	A0A498N4R1		smarcc1	A0A498NKA7		atic	A0A498NBQ9		slc25a3	A0A498NRX4		ywhaz	A0A498LYK8		rpl22	A0A498MSK2		ndufs1	A0A498NNW4		rab10	A0A498NK69		rab8a	A0A498N908		rps18	A0A498MD37		slc25a13	A0A498N6M3		CLTCL1	A0A498NHX3		cand1	A0A498MJ18		hpd	A0A498MBR0
pcif1	A0A498LB19		clic2	A0A498LIJ7		ndufs8	A0A498MMX0		acss2	A0A498LU80		eef2	A0A498NN34		PRKAR2B	A0A498MN60		ywhah	A0A498MXB4		lsm7	A0A498NBE3		copa	A0A498LPI1		rab8a	A0A498N908		eif3d	A0A498NJK1		arpc4	A0A498MR69		hmgcs1	A0A498LWA2		vdac1	A0A498N8F6		rps19	A0A498LRA6		uba1	A0A498MPV8
NEURL2	A0A498LB59		spcs1	A0A498LIS4		sf3a2	A0A498MZH9		aco2	A0A498L8V2		hibch	A0A498NHU6		pgm1	A0A498NUJ2		atp6v0d1	A0A498MIE0		psmd3	A0A498M9B4		rpl10	A0A498L8B5		eif3d	A0A498NJK1		polr1a	A0A498N4E6		tmed10	A0A498NK70		pgm1	A0A498NUJ2		vdac2	A0A498P5M2		rps28	A0A498P454		f9	A0A498LH72
tecpr1	A0A498LB67		podn	A0A498LIT3		cstf2	A0A498NBW5		stom	A0A498NKN9		fhl5	A0A498LMN9		pak1	A0A498NT33		rab35	A0A498MWD3		rab25	A0A498NRK4		ddx49	A0A498NJ09		mtap	A0A498NXD1		COPS6	A0A498MS62		copa	A0A498LPI1		ptbp1	A0A498LJP8		mutyh	A0A498NR65		pura	A0A498ND90		pvrl2	A0A498LBT3
slc25a29	A0A498LBD1		ak2	A0A498LIT6		RPS3A	A0A498LV15		cpsf6	A0A498N6E3		pdcd6ip	A0A498NAQ7		pak2	A0A498MHP4		EHBP1L1	A0A498LMU5		arpc4	A0A498MR69		YBX2	A0A498M3Z6		psma5	A0A498NQY9		rps18	A0A498MD37		kras	A0A498MKW9		CLTCL1	A0A498NHX3		rpl30	A0A498N016		purb	A0A498LFH6		cpb2	A0A498L347
rcc2	A0A498LBD4		SH3BGRL	A0A498LJ34		rps12	A0A498L6L1		btf3	A0A498NED9		ppp2r5c	A0A498LB61		vdac1	A0A498N8F6		rab15	A0A498M7U6		psma5	A0A498NQY9		ybx1	A0A498LW12		polr1a	A0A498N4E6		tmed10	A0A498NK70		nras	A0A498LVZ1		vdac1	A0A498N8F6		vars	A0A498LBP2		ybx1	A0A498LW12		dhx9	A0A498MI27
camkv	A0A498LBD9		ndufb3	A0A498LJ72		fasn	A0A498LY61		rab35	A0A498MWD3		ppp2r5d	A0A498MM69		vdac2	A0A498P5M2		GNAL	A0A498L2H9		fbxo22	A0A498LC85		eif3a	A0A498L5W0		COPS6	A0A498MS62		kras	A0A498MKW9		gapdhs	A0A498L4F1		vdac2	A0A498P5M2		gorasp2	A0A498P6G7		C18orf32	A0A498N8N2		CPN2	A0A498MDK0
ppp2r5c	A0A498LBE4		eno3	A0A498LJB6		ckmt2	A0A498MJE0		farsb	A0A498NU48		CTBP2	A0A498LLX7		mutyh	A0A498NR65		gnat1	A0A498LDI3		lactb	A0A498MZD1		rpl27	A0A498L707		rps18	A0A498MD37		nras	A0A498LVZ1		psmd2	A0A498M7I3		vars	A0A498LBP2		xpo1	A0A498NBE6		cat	A0A498N4M9		c8a	A0A498M176
trnt1	A0A498LBE8		urod	A0A498LJC4		gmds	A0A498MX26		etf1	A0A498MQY2		purb	A0A498LFH6		tmed9	A0A498NTD8		gnat2	A0A498NBP1		rpl8	A0A498N3G7		rab10	A0A498NK69		arpc4	A0A498MR69		gapdhs	A0A498L4F1		pabpn1	A0A498N001		rras	A0A498NPH6		copa	A0A498LPI1		cdk16	A0A498M7X4		chd4	A0A498NJC5
bgn	A0A498LBF9		arl8a	A0A498LJJ3		cul4a	A0A498MHW2		uba1	A0A498MPV8		OGDHL	A0A498MQY5		gorasp2	A0A498P6G7		atp5c1	A0A498LI09		atad3a	A0A498MCP4		rab8a	A0A498N908		tmed10	A0A498NK70		plekhm3	A0A498N4I9		ahcy	A0A498N5E1		tub	A0A498MYE8		rpl10	A0A498L8B5		fgr	A0A498N3G4		sod3	A0A498MH86
abhd16a	A0A498LBG1		lyn	A0A498LJJ7		cse1l	A0A498MSB4		hnrnpdl	A0A498LUJ4		ddx1	A0A498LFM1		ndufs1	A0A498NNW4		YBX2	A0A498M3Z6		slc25a11	A0A498M5Q7		cct8	A0A498LH60		copa	A0A498LPI1		ahcy	A0A498N5E1		gdi2	A0A498MEQ4		tmed9	A0A498NTD8		ddx49	A0A498NJ09		cdk6	A0A498N709		slc2a8	A0A498MPB2
DYNC1H1	A0A498LBI5		klhl15	A0A498LJN2		EHBP1L1	A0A498LMU5		hnrnpa1	A0A498LSH0		nploc4	A0A498LR06		copa	A0A498LPI1		myh11	A0A498NNZ3		wbscr17	A0A498L6I4		eif3d	A0A498NJK1		tm9sf2	A0A498L371		gdi2	A0A498MEQ4		eef1b2	A0A498NP09		gorasp2	A0A498P6G7		upb1	A0A498MHN3		cdk14	A0A498LAD3		c8b	A0A498NBZ9
hsd17b10	A0A498LBK9		pfn1	A0A498LJP3		ppp2r1b	A0A498MWR2		sfxn3	A0A498MZB8		RDX	A0A498NQF9		rpl10	A0A498L8B5		ube2l3	A0A498LC94		mcu	A0A498N0B1		smc1a	A0A498LVV3		kras	A0A498MKW9		eef1d	A0A498NSH4		eef1d	A0A498NSH4		ndufs1	A0A498NNW4		cul3	A0A498NAG6		lck	A0A498NCM9		ACP2	A0A498MBX8
mutyh	A0A498NR65		cmbl	A0A498LJP4		slc25a3	A0A498NRX4		rbbp4	A0A498MLJ2		psma1	A0A498LVZ6		ddx49	A0A498NJ09		acly	A0A498LWG6		rps19	A0A498LRA6		polr1a	A0A498N4E6		nras	A0A498LVZ1		eef1b2	A0A498NP09		rpl13	A0A498NJ12		copa	A0A498LPI1		arpc2	A0A498MY97		lyn	A0A498LJJ7		HELZ2	A0A498NTH4
hectd3	A0A498LBM4		psmb6	A0A498LJQ3		slc25a13	A0A498N6M3		csnk2b	A0A498MJ87		kpna1	A0A498NRI9		upb1	A0A498MHN3		MAP1B	A0A498N3F6		rps28	A0A498P454		COPS6	A0A498MS62		gapdhs	A0A498L4F1		rpl13	A0A498NJ12		psmc2	A0A498MEA3		hspa9	A0A498N369		inpp5d	A0A498L8Q0		cdk4	A0A498NJ42		cfh	A0A498NFR2
vars	A0A498LBP2		cltc	A0A498LJQ6		pgm1	A0A498NUJ2		atic	A0A498NBQ9		kpna5	A0A498NIJ2		YBX2	A0A498M3Z6		rps23	A0A498LR94		purb	A0A498LFH6		rps18	A0A498MD37		plekhm3	A0A498N4I9		psmc2	A0A498MEA3		rpl9	A0A498MXQ4		rpl10	A0A498L8B5		YBX2	A0A498M3Z6		cdk1	A0A498NU75		alox5	A0A498MWJ2
shbg	A0A498LBR0		cast	A0A498LJR2		pak1	A0A498NT33		eef2	A0A498NN34		aifm1	A0A498NF81		ybx1	A0A498LW12		lancl1	A0A498MFQ8		pura	A0A498LGN8		arpc4	A0A498MR69		pabpn1	A0A498N001		rpl9	A0A498MXQ4		pygm	A0A498MJP2		upb1	A0A498MHN3		ybx1	A0A498LW12		magoh	A0A498NRF7		pros1	A0A498MBF2
atp5h	A0A498LBS5		lman1	A0A498LJT3		vdac1	A0A498N8F6		ap2a1	A0A498NQ62		eftud2	A0A498M6Y5		eif3a	A0A498L5W0		myl6	A0A498LTG0		stt3a	A0A498MJ33		tmed10	A0A498NK70		ahcy	A0A498N5E1		glyr1	A0A498NI11		RHOB	A0A498N0J0		YBX2	A0A498M3Z6		rpl27	A0A498L707		chp1	A0A498LVS8		c6	A0A498NC70
pvrl2	A0A498LBT3		rpl7	A0A498LJU3		vdac2	A0A498P5M2		cul3	A0A498NAG6		dhx15	A0A498MH82		rpl27	A0A498L707		myl3	A0A498M9S8		znf592	A0A498LAI4		tm9sf2	A0A498L371		ran	A0A498M343		pygm	A0A498MJP2		MAT1A	A0A498MSY9		ybx1	A0A498LW12		rab10	A0A498NK69		ilf2	A0A498NBZ6		tie1	A0A498NV48
prrt2	A0A498LBU4		cct5	A0A498LK15		mutyh	A0A498NR65		psmb7	A0A498LKB6		prkacb	A0A498NE56		rab10	A0A498NK69		myl1	A0A498NHU8		ahcy	A0A498N5E1		atad2	A0A498MTZ4		gdi2	A0A498MEQ4		RHOB	A0A498N0J0		psmd7	A0A498NJ90		eif3a	A0A498L5W0		rab8a	A0A498N908		erlin1	A0A498NDY9		enpp2	A0A498MB53
KCTD12	A0A498LBV4		ggt5	A0A498LK83		rpl30	A0A498N016		mgat4b	A0A498N4K6		pccb	A0A498P434		cct8	A0A498LH60		rala	A0A498L7X2		C18orf32	A0A498N8N2		kras	A0A498MKW9		eef1d	A0A498NSH4		psmd7	A0A498NJ90		dazap1	A0A498NJ14		rpl27	A0A498L707		eif3d	A0A498NJK1		ank1	A0A498NBP4		masp2	A0A498M256
kctd16	A0A498N2P7		psmb7	A0A498LKB6		vars	A0A498LBP2		clgn	A0A498MT53		BCKDHB	A0A498ME07		eif3d	A0A498NJK1		ralb	A0A498MK55		cat	A0A498N4M9		nras	A0A498LVZ1		eef1b2	A0A498NP09		dazap1	A0A498NJ14		mdh2	A0A498L7R5		rab10	A0A498NK69		polr1a	A0A498N4E6		krt18	A0A498L6M3		c7	A0A498MG81
kctd8	A0A498N8G3		ero1l	A0A498LKD0		rras	A0A498NPH6		ap2b1	A0A498MT56		uba2	A0A498M1Y0		polr1a	A0A498N4E6		ppib	A0A498LAB9		aldoc	A0A498M0I3		gapdhs	A0A498L4F1		rpl13	A0A498NJ12		mdh2	A0A498L7R5		erp44	A0A498NEK6		rab8a	A0A498N908		COPS6	A0A498MS62		ywhaz	A0A498LYK8		cd44	A0A498MH83
col5a3	A0A498LBV7		vamp1	A0A498LKF6		tub	A0A498MYE8		ap1b1	A0A498NK81		slc9b2	A0A498ML40		COPS6	A0A498MS62		rbm39	A0A498MJ42		cdk16	A0A498M7X4		plekhm3	A0A498N4I9		rpl9	A0A498MXQ4		erp44	A0A498NEK6		psmd1	A0A498MUW2		eif3d	A0A498NJK1		rps18	A0A498MD37		ywhah	A0A498MXB4		APOL4	A0A498LJA9
gnl1	A0A498LBW2		bzw1	A0A498LKG8		gorasp2	A0A498P6G7		ppp2r5c	A0A498LB61		npepps	A0A498L5J2		rps18	A0A498MD37		add2	A0A498NGA5		fgr	A0A498N3G4		pabpn1	A0A498N001		pygm	A0A498MJP2		psmd1	A0A498MUW2		smarcc1	A0A498NKA7		ankrd28	A0A498LBT4		mfn2	A0A498LZ42		TMEM200B	A0A498NPL1		proz	A0A498MGM2
acadm	A0A498LBY9		wbp2	A0A498LKH3		xpo1	A0A498NBE6		ppp2r5d	A0A498MM69		abat	A0A498NBJ5		mfn2	A0A498LZ42		hspa9	A0A498N369		cdk6	A0A498N709		ahcy	A0A498N5E1		RHOB	A0A498N0J0		smarcc1	A0A498NKA7		prkaa1	A0A498LRJ7		ap3d1	A0A498MUR0		tmed10	A0A498NK70		rab35	A0A498MWD3		masp1	A0A498MC61
gdpd1	A0A498LBZ1		ndufb8	A0A498LKL7		ndufs1	A0A498NNW4		CTBP2	A0A498LLX7		ank3	A0A498P2Z0		arpc4	A0A498MR69		rpl11	A0A498N3H4		cdk14	A0A498LAD3		MYO1D	A0A498LMR6		MAT1A	A0A498MSY9		prkaa1	A0A498LRJ7		ap2a1	A0A498NQ62		polr1a	A0A498N4E6		atad2	A0A498MTZ4		rab15	A0A498M7U6		adamts13	A0A498MGF1
spcs3	A0A498LC14		ehd3	A0A498LKP9		hspa9	A0A498N369		rpl36	A0A498P165		cp	A0A498MX98		tmed10	A0A498NK70		ube2n	A0A498N6E6		lck	A0A498NCM9		gdi2	A0A498MEQ4		psmd7	A0A498NJ90		nsf	A0A498NMX0		acss2	A0A498LU80		COPS6	A0A498MS62		pabpn1	A0A498N001		GNAL	A0A498L2H9		ggact	A0A498ME34
u2af1	A0A498LY45		cfi	A0A498LKR5		rpl10	A0A498L8B5		purb	A0A498LFH6		fermt2	A0A498N232		tm9sf2	A0A498L371		rps18	A0A498MD37		lyn	A0A498LJJ7		eef1b2	A0A498NP09		dazap1	A0A498NJ14		ap2a1	A0A498NQ62		ap1b1	A0A498NK81		rps18	A0A498MD37		ahcy	A0A498N5E1		gnat1	A0A498LDI3		apoa1	A0A498MYF5
dok2	A0A498LC41		ctsz	A0A498LKT3		arpc2	A0A498MY97		sparc	A0A498NUJ1		AGO4	A0A498N3A3		atp6v1d	A0A498NK38		acaa2	A0A498NHY4		cdk4	A0A498NJ42		eef1d	A0A498NSH4		mdh2	A0A498L7R5		acss2	A0A498LU80		ap2b1	A0A498MT56		tmed10	A0A498NK70		gdi2	A0A498MEQ4		gnat2	A0A498NBP1		lgi1	A0A498LX10
bckdha	A0A498LC60		sod2	A0A498LKV8		YBX2	A0A498M3Z6		psma1	A0A498LVZ6		AGO2	A0A498MVZ4		atad2	A0A498MTZ4		atic	A0A498NBQ9		cdk1	A0A498NU75		rpl13	A0A498NJ12		erp44	A0A498NEK6		march5	A0A498LYJ7		aco2	A0A498L8V2		tm9sf2	A0A498L371		eef1b2	A0A498NP09		kras	A0A498MKW9		ppp1r10	A0A498MTQ7
arf6	A0A498NTC1		SSH3	A0A498LKX2		ybx1	A0A498LW12		EIF4G3	A0A498LQD7		AGO1	A0A498MHI7		gapdhs	A0A498L4F1		tarsl2	A0A498MG49		magoh	A0A498NRF7		prkcd	A0A498L5W8		smarcc1	A0A498NKA7		aco2	A0A498L8V2		stom	A0A498NKN9		atad2	A0A498MTZ4		eef1d	A0A498NSH4		nras	A0A498LVZ1		pltp	A0A498M4T0
XKR4	A0A498LC89		snx3	A0A498LKX7		rpl27	A0A498L707		DDB1	A0A498LQ23		AGO3	A0A498M6D2		plekhm3	A0A498N4I9		tars	A0A498NQZ7		mutyh	A0A498NR65		psmc2	A0A498MEA3		prkaa1	A0A498LRJ7		qars	A0A498LZ02		prkar1a	A0A498N2L8		kras	A0A498MKW9		rpl13	A0A498NJ12		atp5c1	A0A498LI09		cd55	A0A498LLV3
fam160b1	A0A498LC92		npnt	A0A498LL42		rab10	A0A498NK69		aifm1	A0A498NF81		tial1	A0A498NXY1		pabpn1	A0A498N001		CLTCL1	A0A498NHX3		ilf2	A0A498NBZ6		rpl9	A0A498MXQ4		nsf	A0A498NMX0		stom	A0A498NKN9		cpsf6	A0A498N6E3		nras	A0A498LVZ1		psmc2	A0A498MEA3		YBX2	A0A498M3Z6		ntrk2	A0A498M659
tom1l2	A0A498LC95		ppa1	A0A498LL47		rab8a	A0A498N908		eftud2	A0A498M6Y5		tia1	A0A498MJQ9		ahcy	A0A498N5E1		pgrmc1	A0A498LQK2		chp1	A0A498LVS8		psmd14	A0A498LT27		ap2a1	A0A498NQ62		prkar1a	A0A498N2L8		gnaq	A0A498MB94		gapdhs	A0A498L4F1		rpl9	A0A498MXQ4		tln2	A0A498MVU2		OIT3	A0A498NDS4
adam10	A0A498LCA1		dlg5	A0A498LL74		cct8	A0A498LH60		tln1	A0A498LW71		hk1	A0A498N0I6		gdi2	A0A498MEQ4		PRKAR2B	A0A498MN60		rab8a	A0A498N908		pygm	A0A498MJP2		acss2	A0A498LU80		cpsf6	A0A498N6E3		ipo5	A0A498NA00		ahcy	A0A498N5E1		psmd14	A0A498LT27		tln1	A0A498LW71		man1c1	A0A498M6B8
dlgap5	A0A498LCA5		rab3b	A0A498LLB3		eif3d	A0A498NJK1		erh	A0A498LGY3		atp6v1g1	A0A498M939		eef1d	A0A498NSH4		aire	A0A498LNQ2		aph1a	A0A498LY90		RHOB	A0A498N0J0		ptrh2	A0A498LH90		btf3	A0A498NED9		btf3	A0A498NED9		ran	A0A498M343		pygm	A0A498MJP2		cct7	A0A498NUZ4		PNPT1	A0A498L5N9
ddc	A0A498LCB0		agxt2	A0A498LLD3		ap3d1	A0A498MUR0		pccb	A0A498P434		rps9	A0A498NIR7		eef1b2	A0A498NP09		iqgap2	A0A498NQN9		eprs	A0A498LPV0		psmd7	A0A498NJ90		msi1	A0A498LH33		pgk1	A0A498LZY5		pgk1	A0A498LZY5		gdi2	A0A498MEQ4		RHOB	A0A498N0J0		eef1b2	A0A498NP09		ctsd	A0A498LV43
pdxk	A0A498LCE5		aldob	A0A498LLJ4		polr1a	A0A498N4E6		rcc2	A0A498LBD4		psmd3	A0A498M9B4		rpl13	A0A498NJ12		atp2c1	A0A498NKC8		krt18	A0A498L6M3		dazap1	A0A498NJ14		eef2	A0A498NN34		PFKL	A0A498M7R6		PFKL	A0A498M7R6		eef1b2	A0A498NP09		psmd7	A0A498NJ90		eef1d	A0A498NSH4
hps4	A0A498LCF8		aimp1	A0A498LLM0		COPS6	A0A498MS62		arcn1	A0A498N7H4		pgk1	A0A498LZY5		psmc2	A0A498MEA3		eppk1	A0A498NQT4		ywhaz	A0A498LYK8		mdh2	A0A498L7R5		aco2	A0A498L8V2		hagh	A0A498MFI3		hagh	A0A498MFI3		eef1d	A0A498NSH4		dazap1	A0A498NJ14		acly	A0A498LWG6
crocc2	A0A498LCH7		picalm	A0A498LLQ2		u2af1	A0A498LY45		uba2	A0A498M1Y0		psma5	A0A498NQY9		rpl9	A0A498MXQ4		plekhm2	A0A498MXX3		ywhah	A0A498MXB4		erp44	A0A498NEK6		stom	A0A498NKN9		rab35	A0A498MWD3		etf1	A0A498N525		rpl13	A0A498NJ12		kras	A0A498MKW9		plekhm3	A0A498N4I9
hdlbp	A0A498LCI4		nit2	A0A498LLS5		rps18	A0A498MD37		RPL37A	A0A498MNH9		lactb	A0A498MZD1		psmd14	A0A498LT27		prph	A0A498M1K6		TMEM200B	A0A498NPL1		psmd1	A0A498MUW2		mbnl2	A0A498P3P4		uba1	A0A498MPV8		uba1	A0A498MPV8		psmc2	A0A498MEA3		rps28	A0A498P454		myl1	A0A498NHU8
pknox1	A0A498LCK2		ufd1l	A0A498LLT9		mfn2	A0A498LZ42		gapdhs	A0A498L4F1		fbxo22	A0A498LC85		pygm	A0A498MJP2		ldhb	A0A498MKB6		atp6v0d1	A0A498MIE0		smarcc1	A0A498NKA7		prkar1a	A0A498N2L8		hnrnph1	A0A498ND79		hnrnpdl	A0A498LUJ4		rpl9	A0A498MXQ4		ipo5	A0A498NA00		lancl1	A0A498MFQ8
abhd4	A0A498LCN5		atmin	A0A498LLW6		gnaq	A0A498MB94		slc9b2	A0A498ML40		xpo7	A0A498MMK2		RHOB	A0A498N0J0		tmed7	A0A498N8R8		rab35	A0A498MWD3		prkaa1	A0A498LRJ7		cpsf6	A0A498N6E3		hnrnpa1	A0A498LSH0		hnrnpa1	A0A498LSH0		psmd14	A0A498LT27		mdh2	A0A498L7R5		myl6	A0A498LTG0
pomgnt2	A0A498LCN6		tubb1	A0A498LLW9		arpc4	A0A498MR69		npepps	A0A498L5J2		rpl8	A0A498N3G7		psmd7	A0A498NJ90		copb1	A0A498MP80		EHBP1L1	A0A498LMU5		nsf	A0A498NMX0		gnaq	A0A498MB94		sfxn3	A0A498MZB8		sfxn3	A0A498MZB8		pygm	A0A498MJP2		erp44	A0A498NEK6		myl3	A0A498M9S8
sh3bgrl2	A0A498LCP1		FBLN7	A0A498LM03		tmed10	A0A498NK70		agrn	A0A498N4Y4		atad3a	A0A498MCP4		dazap1	A0A498NJ14		plekhm3	A0A498N4I9		rab15	A0A498M7U6		ap2a1	A0A498NQ62		RAB21	A0A498N7R7		eef2	A0A498NN34		rbbp4	A0A498MLJ2		mpp6	A0A498N3F2		psmd1	A0A498MUW2		psmd2	A0A498MHT8
ralbp1	A0A498LCU0		prdx2	A0A498LM50		copa	A0A498LPI1		abat	A0A498NBJ5		slc25a11	A0A498M5Q7		mdh2	A0A498L7R5		krt8	A0A498LUC6		GNAL	A0A498L2H9		acss2	A0A498LU80		hagh	A0A498MFI3		hk1	A0A498N0I6		sord	A0A498L7C3		RHOB	A0A498N0J0		nsf	A0A498NMX0		hnrnph1	A0A498ND79
mta2	A0A498LCW4		map2k4	A0A498LM55		atp6v1d	A0A498NK38		cp	A0A498MX98		wbscr17	A0A498L6I4		cstf1	A0A498MJ92		kcnh6	A0A498NMG8		gnat1	A0A498LDI3		ptrh2	A0A498LH90		rab35	A0A498MWD3		hibch	A0A498NHU6		eef2	A0A498NN34		MAT1A	A0A498MSY9		ap2a1	A0A498NQ62		ppib	A0A498LAB9
sdcbp	A0A498LCY3		ppif	A0A498LM82		kras	A0A498MKW9		eif3a	A0A498L5W0		actr3b	A0A498NRS4		erp44	A0A498NEK6		cs	A0A498LAX4		gnat2	A0A498NBP1		aco2	A0A498L8V2		farsb	A0A498NU48		cul3	A0A498NAG6		psmb7	A0A498LKB6		psmd7	A0A498NJ90		acss2	A0A498LU80		hspa9	A0A498N369
mob2	A0A498LCZ3		actn2	A0A498LMB7		nras	A0A498LVZ1		gatm	A0A498MHC3		rps19	A0A498LRA6		psmd1	A0A498MUW2		pygb	A0A498P430		atp5c1	A0A498LI09		stom	A0A498NKN9		uba1	A0A498MPV8		psmb7	A0A498LKB6		ankrd44	A0A498N9H7		dazap1	A0A498NJ14		aco2	A0A498L8V2		rpl11	A0A498N3H4
rps10	A0A498LD02		gpx7	A0A498LMD6		pabpn1	A0A498N001		fermt2	A0A498N232		pura	A0A498LGN8		smarcc1	A0A498NKA7		pygl	A0A498LA35		tln1	A0A498LW71		mbnl2	A0A498P3P4		hnrnph1	A0A498ND79		clgn	A0A498MT53		sept10	A0A498MAY9		ipo5	A0A498NA00		stom	A0A498NKN9		acaa2	A0A498NHY4
SNX2	A0A498N6C7		acyp2	A0A498LMD9		ahcy	A0A498N5E1		vps29	A0A498NKF0		rab25	A0A498NRK4		nsf	A0A498NMX0		gcfc2	A0A498MHT5		tln2	A0A498MVU2		dnajc11	A0A498N2W1		hnrnpdl	A0A498LUJ4		mgat4b	A0A498N4K6		ppp2r5d	A0A498MM69		mdh2	A0A498L7R5		gdap1	A0A498NBX4		eef1g	A0A498NTK4
rtfdc1	A0A498LD21		itgb3	A0A498LMH6		gdi2	A0A498MEQ4		tial1	A0A498NXY1		rab11a	A0A498MBF7		ap2a1	A0A498NQ62		rpl12	A0A498LPL3		iqgap1	A0A498MM11		prkar1a	A0A498N2L8		hnrnpa1	A0A498LSH0		pdcd6ip	A0A498NAQ7		ppp2r5c	A0A498LB61		erp44	A0A498NEK6		prkar1a	A0A498N2L8		tars	A0A498NQZ7
rpf2	A0A498LD23		rangrf	A0A498LMN3		eef1b2	A0A498NP09		tia1	A0A498MJQ9		ndufs1	A0A498NNW4		acss2	A0A498LU80		sdha	A0A498M1C7		erlin2	A0A498N7A4		cpsf6	A0A498N6E3		sfxn3	A0A498MZB8		cand1	A0A498MJ18		rpl36	A0A498P165		psmd1	A0A498MUW2		cpsf6	A0A498N6E3		tarsl2	A0A498MG49
AP3B2	A0A498LD24		fhl5	A0A498LMN9		eef1d	A0A498NSH4		atp6v1g1	A0A498M939		cdk16	A0A498M7X4		aco2	A0A498L8V2		hars	A0A498NES3		ank1	A0A498NBP4		btf3	A0A498NED9		xpo1	A0A498NBE6		ppp2r5c	A0A498LB61		purb	A0A498LFH6		smarcc1	A0A498NKA7		btf3	A0A498NED9		CLTCL1	A0A498NHX3
AP3B1	A0A498M1W5		dusp3	A0A498LMQ2		rpl13	A0A498NJ12		uchl5	A0A498MAE5		fgr	A0A498N3G4		stom	A0A498NKN9		prpf8	A0A498LH59		pygl	A0A498LA35		pgk1	A0A498LZY5		rbbp4	A0A498MLJ2		ppp2r5d	A0A498MM69		dnm1l	A0A498P3I9		prkaa1	A0A498LRJ7		PFKL	A0A498M7R6		eppk1	A0A498NQT4
hspa14	A0A498LD43		eno1	A0A498LMQ3		prkcd	A0A498L5W8		rpl26l1	A0A498ND70		cdk6	A0A498N709		prkar1a	A0A498N2L8		slc2a2	A0A498LBV9		cand1	A0A498MJ18		PFKL	A0A498M7R6		sord	A0A498L7C3		CTBP2	A0A498LLX7		RDX	A0A498NQF9		ap2a1	A0A498NQ62		hagh	A0A498MFI3		plekhm2	A0A498MXX3
ptprk	A0A498LD50		MYO1D	A0A498LMR6		rpl9	A0A498MXQ4		rps9	A0A498NIR7		cdk14	A0A498LAD3		cpsf6	A0A498N6E3		srsf3	A0A498MV30		atp2a1	A0A498NW58		hagh	A0A498MFI3		csnk2b	A0A498MJ87		bud31	A0A498L5I4		me1	A0A498NJ16		acss2	A0A498LU80		drg1	A0A498NSN9		ldhb	A0A498MKB6
adck3	A0A498LD68		itga9	A0A498LMS0		psmd14	A0A498LT27		psmd3	A0A498M9B4		lck	A0A498NCM9		ipo5	A0A498NA00		eftud2	A0A498M6Y5		atp2a3	A0A498LYA4		rab35	A0A498MWD3		atic	A0A498NBQ9		rpl36	A0A498P165		psma1	A0A498LVZ6		ptrh2	A0A498LH90		rab35	A0A498MWD3		ttc39a	A0A498NRY0
C6orf58	A0A498LD72		EHBP1L1	A0A498LMU5		glyr1	A0A498NI11		rab25	A0A498NRK4		cdk4	A0A498NJ42		btf3	A0A498NED9		rpl34	A0A498LPR4		lancl1	A0A498MFQ8		DHX35	A0A498MG05		hk1	A0A498N0I6		purb	A0A498LFH6		cs	A0A498LAX4		eef2	A0A498NN34		nras	A0A498LVZ1		calr3	A0A498MMJ7
hmgb2	A0A498LD75		aldh18a1	A0A498LMW6		pygm	A0A498MJP2		arpc4	A0A498MR69		cdk1	A0A498NU75		acaca	A0A498M9R9		camk2a	A0A498N294		myl6	A0A498LTG0		klc1	A0A498MWF4		ap1g1	A0A498NJ31		prpf8	A0A498LH59		ddx1	A0A498LFM1		aco2	A0A498L8V2		klc1	A0A498MWF4		atad2	A0A498MTZ4
KATNAL1	A0A498M7J9		tmem50a	A0A498LMZ1		mpp6	A0A498N3F2		dhx9	A0A498MI27		lyn	A0A498LJJ7		RAB21	A0A498N7R7		rpl22	A0A498MSK2		myl3	A0A498M9S8		uba1	A0A498MPV8		hibch	A0A498NHU6		nploc4	A0A498LR06		aifm1	A0A498NF81		SLC25A10	A0A498M8Q5		DHX35	A0A498MG05		krt8	A0A498LUC6
rars2	A0A498LDA6		GFPT1	A0A498LN13		RHOB	A0A498N0J0		pgm1	A0A498NUJ2		ube2n	A0A498N6E6		drg1	A0A498NSN9		cops2	A0A498N4G1		myl4	A0A498MJ94		hnrnpdl	A0A498LUJ4		cul3	A0A498NAG6		ERAP1	A0A498NJS0		gmpr2	A0A498MKE8		stom	A0A498NKN9		etf1	A0A498N525		kcnh6	A0A498NMG8
vta1	A0A498LDA8		UBL4A	A0A498LN23		DDB1	A0A498LQ23		psma5	A0A498NQY9		tagap	A0A498NFZ5		rab35	A0A498MWD3		tln1	A0A498LW71		myl1	A0A498NHU8		hnrnpa1	A0A498LSH0		ankrd44	A0A498N9H7		dnm1l	A0A498P3I9		gmpr	A0A498MVQ2		prkar1a	A0A498N2L8		uba1	A0A498MPV8		pygb	A0A498P430
ndufs5	A0A498LDC1		vapb	A0A498LN48		psmd7	A0A498NJ90		myl4	A0A498MJ94		ilf2	A0A498NBZ6		mgat4b	A0A498N4K6		psma8	A0A498M831		ppib	A0A498LAB9		sfxn3	A0A498MZB8		myo1c	A0A498LHU8		sept6	A0A498LGV3		prkacb	A0A498NE56		btf3	A0A498NED9		hnrnpdl	A0A498LUJ4		pygl	A0A498LA35
ppil1	A0A498LDE1		tmem214	A0A498LN85		dazap1	A0A498NJ14		fbxo22	A0A498LC85		aph1a	A0A498LY90		etf1	A0A498MQY2		SNX2	A0A498N6C7		hspa9	A0A498N369		ndufv1	A0A498LWS5		mprip	A0A498L463		me1	A0A498NJ16		erh	A0A498LGY3		acaca	A0A498M9R9		hnrnpa1	A0A498LSH0		gcfc2	A0A498MHT5
grm2	A0A498LDH3		acsf2	A0A498LNB8		mdh2	A0A498L7R5		lactb	A0A498MZD1		rab8a	A0A498N908		uba1	A0A498MPV8		dld	A0A498LAH2		rpl11	A0A498N3H4		rbbp4	A0A498MLJ2		pdcd6ip	A0A498NAQ7		smc1a	A0A498LVV3		ubqln4	A0A498NQC9		PFKL	A0A498M7R6		sfxn3	A0A498MZB8		rpl12	A0A498LPL3
PDXP	A0A498LDH5		cnn1	A0A498LNC0		cstf1	A0A498MJ92		rpl8	A0A498N3G7		erlin1	A0A498NDY9		hnrnph1	A0A498ND79		lmnb1	A0A498LZD2		ube2n	A0A498N6E6		csnk2b	A0A498MJ87		ppp2r5d	A0A498MM69		psma1	A0A498LVZ6		pccb	A0A498P434		hagh	A0A498MFI3		sord	A0A498L7C3		aldob	A0A498LLJ4
arpc5	A0A498LDJ8		psen2	A0A498LND9		erp44	A0A498NEK6		slc25a11	A0A498M5Q7		ank1	A0A498NBP4		hnrnpdl	A0A498LUJ4		pak1	A0A498NT33		rps18	A0A498MD37		ptpn1	A0A498MHR0		ppp2r5c	A0A498LB61		cs	A0A498LAX4		mbnl2	A0A498P3P4		nampt	A0A498NA34		atic	A0A498NBQ9		gsn	A0A498NKF8
ivns1abp	A0A498M832		papss1	A0A498LNF8		psmd1	A0A498MUW2		wbscr17	A0A498L6I4		ANK2	A0A498MI53		hnrnpa1	A0A498LSH0		yars	A0A498N049		acaa2	A0A498NHY4		atic	A0A498NBQ9		CTBP2	A0A498LLX7		kpna1	A0A498NRI9		arcn1	A0A498N7H4		rab35	A0A498MWD3		eef2	A0A498NN34		slc2a2	A0A498LBV9
stmn4	A0A498LDJ9		h6pd	A0A498LNH7		smarcc1	A0A498NKA7		rps19	A0A498LRA6		krt18	A0A498L7I0		sfxn3	A0A498MZB8		psmd14	A0A498LT27		atic	A0A498NBQ9		eef2	A0A498NN34		bud31	A0A498L5I4		kpna5	A0A498NIJ2		uba2	A0A498M1Y0		etf1	A0A498N525		ap1g1	A0A498NJ31		abce1	A0A498NQD7
CDC42BPA	A0A498LDK7		C2orf76	A0A498LNI4		prkaa1	A0A498LRJ7		hnrnpk	A0A498NGQ1		ywhaz	A0A498LYK8		ptpn1	A0A498MHR0		xpo1	A0A498NBE6		RAP1GDS1	A0A498NIT8		hk1	A0A498N0I6		rpl36	A0A498P165		DDB1	A0A498LQ23		RPL37A	A0A498MNH9		cars	A0A498LSF8		hibch	A0A498NHU6		srsf3	A0A498MV30
dhcr24	A0A498LDP8		dnajc12	A0A498LNK7		nsf	A0A498NMX0		rps28	A0A498P454		ywhah	A0A498MXB4		atic	A0A498NBQ9		MAP1A	A0A498MEJ1		tarsl2	A0A498MG49		ap1g1	A0A498NJ31		purb	A0A498LFH6		aifm1	A0A498NF81		slc9b2	A0A498ML40		uba1	A0A498MPV8		psmb7	A0A498LKB6		camk2a	A0A498N294
bax	A0A498LDQ3		chad	A0A498LNL3		ap2a1	A0A498NQ62		nedd8	A0A498MPI0		atp6v1h	A0A498MJS7		eef2	A0A498NN34		psmd2	A0A498MHT8		tars	A0A498NQZ7		cul3	A0A498NAG6		OGDHL	A0A498MQY5		gmpr2	A0A498MKE8		ank3	A0A498P2Z0		hnrnpdl	A0A498LUJ4		eftud2	A0A498M6Y5		rpl22	A0A498MSK2
mad1l1	A0A498LDS3		pip4k2c	A0A498LNL7		acss2	A0A498LU80		wdr34	A0A498LXI4		atp6v0d1	A0A498MIE0		hibch	A0A498NHU6		ilf3	A0A498NVH4		pgrmc1	A0A498LQK2		ankrd44	A0A498N9H7		prpf8	A0A498LH59		gmpr	A0A498MVQ2		ANK2	A0A498MI53		hnrnpa1	A0A498LSH0		pdcd6ip	A0A498NAQ7		pfkp	A0A498LU01
flii	A0A498LDS4		chmp2a	A0A498LNM5		aco2	A0A498L8V2		set	A0A498NHZ1		rab15	A0A498M7U6		cul3	A0A498NAG6		prdx1	A0A498M0B1		PRKAR2B	A0A498MN60		mgat4b	A0A498N4K6		sept6	A0A498LGV3		eftud2	A0A498M6Y5		abat	A0A498NBJ5		sfxn3	A0A498MZB8		ppp2r5c	A0A498LB61		psma1	A0A498MAF0
ncf4	A0A498LDT0		ftcd	A0A498LNN9		qars	A0A498LZ02		pura	A0A498LGN8		rab35	A0A498MWD3		psmb7	A0A498LKB6		flnc	A0A498MEP5		aire	A0A498LNQ2		clgn	A0A498MT53		me1	A0A498NJ16		tln1	A0A498LW71		cp	A0A498MX98		rbbp4	A0A498MLJ2		ppp2r5d	A0A498MM69		dld	A0A498LAH2
HPCAL1	A0A498LDM3		aire	A0A498LNQ2		SLC25A10	A0A498M8Q5		cat	A0A498N4M9		gnat2	A0A498NBP1		clgn	A0A498MT53		camk2d	A0A498NIW6		prkaa1	A0A498LRJ7		fhl5	A0A498LMN9		mvp	A0A498LX76		prkacb	A0A498NE56		snrnp200	A0A498MF00		sord	A0A498L7C3		rpl36	A0A498P165		park7	A0A498LYB8
ncald	A0A498LGU7		fasn	A0A498LNV7		stom	A0A498NKN9		aldoc	A0A498M0I3		GNAL	A0A498L2H9		pdcd6ip	A0A498NAQ7		rps6ka3	A0A498MVB5		iqgap2	A0A498NQN9		pdcd6ip	A0A498NAQ7		smc1a	A0A498LVV3		pccb	A0A498P434		fermt2	A0A498N232		ptpn1	A0A498MHR0		purb	A0A498LFH6		lmnb1	A0A498LZD2
hpcal4	A0A498P3S4		ptpre	A0A498LNW6		gdap1	A0A498NBX4		ndufs1	A0A498NNW4		gnat1	A0A498LDI3		rae1	A0A498N8H1		ddi2	A0A498L5Z7		tmed2	A0A498N739		ppp2r5d	A0A498MM69		psma1	A0A498LVZ6		arcn1	A0A498N7H4		AGO3	A0A498M6D2		atic	A0A498NBQ9		nploc4	A0A498LR06		carm1	A0A498N662
tpr	A0A498LDV6		lhpp	A0A498LNX9		prkar1a	A0A498N2L8		acaa2	A0A498NHY4		mutyh	A0A498NR65		ppp2r5c	A0A498LB61		rsu1	A0A498N579		ap2s1	A0A498M0T3		ppp2r5c	A0A498LB61		cs	A0A498LAX4		sf3b1	A0A498NAS7		AGO4	A0A498N3A3		ap1g1	A0A498NJ31		rbm42	A0A498L582		rpl18	A0A498NPB6
atg5	A0A498LDW8		emc8	A0A498LP04		cpsf6	A0A498N6E3		cdk16	A0A498M7X4		atp5c1	A0A498LI09		ppp2r5d	A0A498MM69		PEA15	A0A498NPD4		eppk1	A0A498NQT4		rpl36	A0A498P165		kpna5	A0A498NIJ2		RPL37A	A0A498MNH9		AGO2	A0A498MVZ4		hibch	A0A498NHU6		tfcp2	A0A498LI31		rpl7	A0A498LJU3
pmvk	A0A498LDZ2		acaa1	A0A498LP08		ipo5	A0A498NA00		fgr	A0A498N3G4		GAN	A0A498MVI4		rpl36	A0A498P165		sept5	A0A498LUE9		plekhm2	A0A498MXX3		purb	A0A498LFH6		kpna1	A0A498NRI9		atp2b2	A0A498NJB6		AGO1	A0A498MHI7		cul3	A0A498NAG6		kpna1	A0A498NRI9		psmc4	A0A498NK57
ggct	A0A498LE09		efhd2	A0A498LP25		acaca	A0A498M9R9		cdk6	A0A498N709		tln1	A0A498LW71		purb	A0A498LFH6		chmp4b	A0A498N7K0		ldhb	A0A498MKB6		prpf8	A0A498LH59		DDB1	A0A498LQ23		atp2b4	A0A498LE85		arf6	A0A498NTC1		psmb7	A0A498LKB6		larp4b	A0A498NNM6		psmd14	A0A498LT27
pvalb	A0A498LE30		C14orf166	A0A498LP40		pgk1	A0A498LZY5		cdk14	A0A498LAD3		tln2	A0A498MVU2		prpf8	A0A498LH59		nsfl1c	A0A498LA40		calr3	A0A498MMJ7		nploc4	A0A498LR06		aifm1	A0A498NF81		slc9b2	A0A498ML40		vps29	A0A498NKF0		mgat4b	A0A498N4K6		psma1	A0A498LVZ6		MAP1B	A0A498N3F6
slc7a14	A0A498LE44		ntpcr	A0A498LP47		PFKL	A0A498M7R6		lck	A0A498NCM9		iqgap1	A0A498MM11		nploc4	A0A498LR06		psmc4	A0A498NK57		ttc39a	A0A498NRY0		ERAP1	A0A498NJS0		snd1	A0A498MKL8		ank3	A0A498P2Z0		aco1	A0A498MTB1		clgn	A0A498MT53		EIF4G3	A0A498LQD7		MAP1A	A0A498MEJ1
ndc1	A0A498LE50		glo1	A0A498LP57		hagh	A0A498MFI3		cdk4	A0A498NJ42		cct7	A0A498NUZ4		cops5	A0A498MZ60		aldh1a2	A0A498L6Y8		copb1	A0A498MP80		chd4	A0A498NJC5		eftud2	A0A498M6Y5		ANK2	A0A498MI53		tial1	A0A498NXY1		pdcd6ip	A0A498NAQ7		kpna5	A0A498NIJ2		gpi	A0A498MUB2
nccrp1	A0A498LE53		dync1i2	A0A498LP67		rab35	A0A498MWD3		cdk1	A0A498NU75		erlin2	A0A498N7A4		kpna1	A0A498NRI9		paics	A0A498MUQ6		krt8	A0A498LUC6		sparc	A0A498NUJ1		akt1	A0A498NSQ3		abat	A0A498NBJ5		tia1	A0A498MJQ9		ppp2r5d	A0A498MM69		tcea2	A0A498LS47		rpl26l1	A0A498ND70
lamp2	A0A498LL15		rpl7a	A0A498LPH1		klc1	A0A498MWF4		lyn	A0A498LJJ7		pygl	A0A498LA35		larp4b	A0A498NNM6		top2b	A0A498LY18		kcnh6	A0A498NMG8		psma1	A0A498LVZ6		akt2	A0A498MFH8		cp	A0A498MX98		gmfb	A0A498LA25		ppp2r5c	A0A498LB61		txlna	A0A498LYA1		psmd7	A0A498NJ90
cntnap2	A0A498L7N6		copa	A0A498LPI1		DHX35	A0A498MG05		ube2n	A0A498N6E6		GLDC	A0A498MTC9		psma1	A0A498LVZ6		tcp1	A0A498L2V9		psmc2	A0A498MEA3		ddx1	A0A498LFM1		prkacb	A0A498NE56		ap3d1	A0A498MUR0		GMFG	A0A498L6I2		rpl36	A0A498P165		txlng	A0A498NJ86		prdx1	A0A498M0B1
CNTNAP3	A0A498LC46		gfpt2	A0A498LPI3		etf1	A0A498MQY2		magoh	A0A498NRF7		acly	A0A498LWG6		cs	A0A498LAX4		eif3g	A0A498L7T5		nsf	A0A498NMX0		kpna1	A0A498NRI9		erh	A0A498LGY3		snrnp200	A0A498MF00		nsf	A0A498NMX0		purb	A0A498LFH6		MAP1B	A0A498N3F6		camk2d	A0A498NIW6
ca7	A0A498M0C2		nhlrc2	A0A498LPK8		cars	A0A498LSF8		ilf2	A0A498NBZ6		MAP1B	A0A498N3F6		kpna5	A0A498NIJ2		gpi	A0A498MUB2		pygb	A0A498P430		kpna5	A0A498NIJ2		pccb	A0A498P434		fermt2	A0A498N232		atp6v1g1	A0A498M939		prpf8	A0A498LH59		aifm1	A0A498NF81		hars	A0A498NES3
atp2b4	A0A498LE85		nhp2	A0A498LPL2		uba1	A0A498MPV8		aph1a	A0A498LY90		myl4	A0A498MJ94		tcea2	A0A498LS47		ctsd	A0A498LV43		gcfc2	A0A498MHT5		EIF4G3	A0A498LQD7		BCKDHB	A0A498ME07		cops4	A0A498MM59		uchl5	A0A498MAE5		ddx1	A0A498LFM1		gmpr2	A0A498MKE8		psmd1	A0A498MYM2
atp2b2	A0A498NJ58		rpl12	A0A498LPL3		hnrnph1	A0A498ND79		erlin1	A0A498NDY9		myl1	A0A498NHU8		EIF4G3	A0A498LQD7		rab5a	A0A498MZU2		rpl12	A0A498LPL3		DDB1	A0A498LQ23		uba2	A0A498M1Y0		AGO3	A0A498M6D2		rpl26l1	A0A498ND70		nploc4	A0A498LR06		gmpr	A0A498MVQ2		nsfl1c	A0A498LA40
PLEKHA6	A0A498LE89		c9	A0A498LPL8		hnrnpdl	A0A498LUJ4		eprs	A0A498LPV0		lancl1	A0A498MFQ8		vps35	A0A498MDH6		kcnh4	A0A498LZM8		cs	A0A498LAX4		snd1	A0A498MKL8		sf3b1	A0A498NAS7		AGO2	A0A498MVZ4		rps9	A0A498NIR7		dnm1l	A0A498P3I9		prpf8	A0A498LH59		dazap1	A0A498NJ14
cspg4	A0A498LE97		uap1l1	A0A498LPN6		hnrnpa1	A0A498LSH0		krt18	A0A498L7I0		myl6	A0A498LTG0		tubg1	A0A498MG41		sf3b3	A0A498MBG5		NKPD1	A0A498NRI4		eftud2	A0A498M6Y5		RPL37A	A0A498MNH9		AGO4	A0A498N3A3		ilf3	A0A498NVH4		sept6	A0A498LGV3		trip12	A0A498MF43		xpo1	A0A498NBE6
eif2s3	A0A498LEC0		rpl34	A0A498LPR4		sfxn3	A0A498MZB8		ywhaz	A0A498LYK8		myl3	A0A498M9S8		aifm1	A0A498NF81		pdia3	A0A498MDR7		hars	A0A498NES3		dhx15	A0A498MH82		slc9b2	A0A498ML40		AGO1	A0A498MHI7		psmd3	A0A498M9B4		RDX	A0A498NQF9		dhx15	A0A498MH82		wdr34	A0A498LXI4
cul1	A0A498LED4		srpx2	A0A498LPR7		rbbp4	A0A498MLJ2		ywhah	A0A498MXB4		ppib	A0A498LAB9		gmpr2	A0A498MKE8		usp9x	A0A498N7E8		aldob	A0A498LLJ4		erh	A0A498LGY3		npepps	A0A498L5J2		tial1	A0A498NXY1		rab25	A0A498NRK4		me1	A0A498NJ16		polr2e	A0A498NNF7		nars	A0A498M1S6
TRIP10	A0A498L7Z4		actr2	A0A498LPS4		sord	A0A498L7C3		atp6v1h	A0A498MJS7		hspa9	A0A498N369		gmpr	A0A498MVQ2		uchl5	A0A498MAE5		slc2a2	A0A498LBV9		pccb	A0A498P434		agrn	A0A498N4Y4		tia1	A0A498MJQ9		psma5	A0A498NQY9		psma1	A0A498LVZ6		prkacb	A0A498NE56		rps16	A0A498LS35
fgg	A0A498LEH5		ugp2	A0A498LPT3		atic	A0A498NBQ9		TMEM200B	A0A498NPL1		rpl27	A0A498L707		snd1	A0A498MKL8		etf1	A0A498N525		srsf3	A0A498MV30		arcn1	A0A498N7H4		abat	A0A498NBJ5		atp6v1g1	A0A498M939		myl4	A0A498MJ94		cs	A0A498LAX4		erh	A0A498LGY3		paics	A0A498MUQ6
angptl7	A0A498LVX8		eprs	A0A498LPV0		eef2	A0A498NN34		atp6v0d1	A0A498MIE0		acaa2	A0A498NHY4		dhx15	A0A498MH82		psma1	A0A498LVZ6		rpl34	A0A498LPR4		uba2	A0A498M1Y0		MAP1B	A0A498N3F6		uchl5	A0A498MAE5		fbxo22	A0A498LC85		mut	A0A498N3E3		pccb	A0A498P434		asns	A0A498M0X4
uroc1	A0A498LEI0		afap1l2	A0A498LPY6		hk1	A0A498N0I6		rab15	A0A498M7U6		CLTCL1	A0A498NHX3		erh	A0A498LGY3		gmds	A0A498MX26		camk2a	A0A498N294		sf3b1	A0A498NAS7		cp	A0A498MX98		rps9	A0A498NIR7		lactb	A0A498MZD1		emc8	A0A498LP04		ssu72	A0A498L4V5		acat1	A0A498MP51
lrrcc1	A0A498LJH4		DDB1	A0A498LQ23		ap1g1	A0A498NJ31		gnat2	A0A498NBP1		psmd14	A0A498LT27		pccb	A0A498P434		g3bp1	A0A498NTC7		cops2	A0A498N4G1		snrnp200	A0A498MF00		ap3d1	A0A498MUR0		ilf3	A0A498NVH4		rpl8	A0A498N3G7		EIF4G3	A0A498LQD7		ube2g2	A0A498NP91		ctsd	A0A498LV43
pfkfb2	A0A498LRR2		comtd1	A0A498LQ30		hibch	A0A498NHU6		GNAL	A0A498L2H9		eef1g	A0A498NTK4		ssu72	A0A498L4V5		park7	A0A498LYB8		pfkp	A0A498LU01		rad21	A0A498MSE0		aars	A0A498MDH5		psmd3	A0A498M9B4		slc25a11	A0A498M5Q7		DDB1	A0A498LQ23		arcn1	A0A498N7H4		rab5a	A0A498MZU2
mphosph10	A0A498LEK0		appl1	A0A498LQ34		cul3	A0A498NAG6		gnat1	A0A498LDI3		tarsl2	A0A498MG49		BCKDHB	A0A498ME07		rpl5	A0A498M2R0		ap1s1	A0A498MJV6		RPL37A	A0A498MNH9		sec23b	A0A498N4Q4		rab25	A0A498NRK4		wbscr17	A0A498L6I4		mcm3ap	A0A498NI93		uba2	A0A498M1Y0		kcnh4	A0A498LZM8
cav3	A0A498LEL3		vtn	A0A498LQ67		psmb7	A0A498LKB6		atp5c1	A0A498LI09		tars	A0A498NQZ7		arcn1	A0A498N7H4		psmb1	A0A498N6J0		cars	A0A498LSF8		pxn	A0A498LSP3		fermt2	A0A498N232		ctr9	A0A498N271		cand1	A0A498MJ18		aifm1	A0A498NF81		RPL37A	A0A498MNH9		tmem214	A0A498LN85
ints3	A0A498LEL9		thop1	A0A498LQ71		ankrd44	A0A498N9H7		tln2	A0A498MVU2		nsun2	A0A498MNR7		uba2	A0A498M1Y0		hnrnpdl	A0A498LUJ4		psma1	A0A498MAF0		slc9b2	A0A498ML40		AGO3	A0A498M6D2		arpc4	A0A498MR69		mcu	A0A498N0B1		gmpr2	A0A498MKE8		zmiz2	A0A498N9I9		SPIDR	A0A498MSK4
DNAJA4	A0A498LES0		snx5	A0A498LQ72		eftud2	A0A498M6Y5		cct7	A0A498NUZ4		prkaa1	A0A498LRJ7		RPL37A	A0A498MNH9		lasp1	A0A498LWE3		SNX2	A0A498N6C7		npepps	A0A498L5J2		AGO1	A0A498MHI7		psma5	A0A498NQY9		rps19	A0A498LRA6		gmpr	A0A498MVQ2		ppid	A0A498LWH4		eftud2	A0A498M6Y5
rpa3	A0A498LES4		rock2	A0A498LQC0		mgat4b	A0A498N4K6		erlin2	A0A498N7A4		eppk1	A0A498NQT4		slc9b2	A0A498ML40		ckm	A0A498LPZ0		dld	A0A498LAH2		cp	A0A498MX98		AGO2	A0A498MVZ4		myl4	A0A498MJ94		rps28	A0A498P454		snd1	A0A498MKL8		RGPD5	A0A498MN61		sf3b3	A0A498MBG5
ano10	A0A498LES5		slc16a9	A0A498LQI4		clgn	A0A498MT53		ank1	A0A498NBP4		plekhm2	A0A498MXX3		ap3d1	A0A498MUR0		hsd17b10	A0A498LBK9		lmnb1	A0A498LZD2		ap3d1	A0A498MUR0		AGO4	A0A498N3A3		lactb	A0A498MZD1		nedd8	A0A498MPI0		eftud2	A0A498M6Y5		ruvbl2	A0A498LQK9		pdia3	A0A498MDR7
txndc17	A0A498LEU3		rabggta	A0A498LQJ1		sept10	A0A498MAY9		acly	A0A498LWG6		nckap1	A0A498N459		aars	A0A498MDH5		eif3b	A0A498L933		pak1	A0A498NT33		fermt2	A0A498N232		tial1	A0A498NXY1		fbxo22	A0A498LC85		pura	A0A498ND90		dhx15	A0A498MH82		nsun2	A0A498MNR7		drg2	A0A498M5H6
hm13	A0A498LEV3		pgrmc1	A0A498LQK2		pdcd6ip	A0A498NAQ7		myl1	A0A498NHU8		ldhb	A0A498MKB6		fermt2	A0A498N232		vps4b	A0A498N0L6		rsu1	A0A498N579		AGO3	A0A498M6D2		tia1	A0A498MJQ9		xpo7	A0A498MMK2		stt3a	A0A498MJ33		prkacb	A0A498NE56		nhp2l1	A0A498NAK3		rpl5	A0A498M2R0
ascc3	A0A498LEW1		ruvbl2	A0A498LQK9		acot7	A0A498LYK0		lancl1	A0A498MFQ8		dbnl	A0A498NAE7		sec13	A0A498MAC6		vps4a	A0A498NFE0		cct8	A0A498LH60		AGO2	A0A498MVZ4		ank3	A0A498NCQ5		psmc3	A0A498MJ03		znf592	A0A498LAI4		erh	A0A498LGY3		npepps	A0A498L5J2		psmb1	A0A498N6J0
ABCD2	A0A498LEX8		agmat	A0A498LQL0		ppp2r5d	A0A498MM69		myl6	A0A498LTG0		atad2	A0A498MTZ4		eif2b2	A0A498NKP3		prdx4	A0A498L8V5		yars	A0A498N049		AGO4	A0A498N3A3		psmd1	A0A498MYM2		rpl8	A0A498N3G7		dars	A0A498N790		pccb	A0A498P434		rad21	A0A498MSE0		vps29	A0A498NKF0
abcd1	A0A498LRH6		tsnax	A0A498LQL6		ppp2r5c	A0A498LB61		myl3	A0A498M9S8		krt8	A0A498LUC6		ctnnb1	A0A498LCC7		ruvbl2	A0A498LQK9		cct7	A0A498NUZ4		AGO1	A0A498MHI7		uchl5	A0A498MAE5		atad3a	A0A498MCP4		ank1	A0A498NBP4		BCKDHB	A0A498ME07		agrn	A0A498N4Y4		hnrnpdl	A0A498LUJ4
bsnd	A0A498LEY1		serpinh1	A0A498LQN4		CTBP2	A0A498LLX7		hnrnph1	A0A498ND79		kcnh6	A0A498NMG8		tial1	A0A498NXY1		rps16	A0A498LS35		psmd14	A0A498LT27		arf6	A0A498NTC1		pxn	A0A498MQW6		slc25a11	A0A498M5Q7		chd4	A0A498NJC5		ube2g2	A0A498NP91		cp	A0A498MX98		etf1	A0A498MQY2
sod1	A0A498LF02		acp1	A0A498LQP8		rpl36	A0A498P165		ppib	A0A498LAB9		cat	A0A498N4M9		tia1	A0A498MJQ9		ogt	A0A498MSU8		aars	A0A498MDH5		cpox	A0A498NRK2		rpl26l1	A0A498ND70		wbscr17	A0A498L6I4		cat	A0A498N4M9		arcn1	A0A498N7H4		aars	A0A498MDH5		lasp1	A0A498LWE3
RECK	A0A498LF10		col6a6	A0A498LQS3		bud31	A0A498L5I4		tars	A0A498NQZ7		pygb	A0A498P430		supt16h	A0A498NW20		hibadh	A0A498NNB9		ruvbl2	A0A498LQK9		tial1	A0A498NXY1		rock2	A0A498LQC0		mcu	A0A498N0B1		pip4k2a	A0A498L6U4		uba2	A0A498M1Y0		fermt2	A0A498N232		ckm	A0A498LPZ0
tm7sf2	A0A498LF12		gbas	A0A498LR17		purb	A0A498LFH6		tarsl2	A0A498MG49		gcfc2	A0A498MHT5		RGPD5	A0A498MN61		cct8	A0A498LH60		ilf3	A0A498NVH4		tia1	A0A498MJQ9		rps9	A0A498NIR7		rps19	A0A498LRA6		hkdc1	A0A498N424		sf3b1	A0A498NAS7		cops4	A0A498MM59		hsd17b10	A0A498LBK9
vps51	A0A498LF16		plek2	A0A498LR71		OGDHL	A0A498MQY5		pgrmc1	A0A498LQK2		rpl12	A0A498LPL3		uchl5	A0A498MAE5		snrnp70	A0A498NMP8		flnc	A0A498MEP5		ank3	A0A498NCQ5		lsm7	A0A498NBE3		hnrnpk	A0A498NGQ1		aldh3b1	A0A498N2C4		snrnp200	A0A498MF00		eif2b2	A0A498NKP3		ckb	A0A498MSZ6
loxl1	A0A498LF75		rps23	A0A498LR94		prpf8	A0A498LH59		rab18	A0A498LVL4		cs	A0A498LAX4		rpl26l1	A0A498ND70		atad2	A0A498MTZ4		rpl26l1	A0A498ND70		GMFG	A0A498L6I2		ilf3	A0A498NVH4		rps28	A0A498P454		acaa2	A0A498NHY4		RPL37A	A0A498MNH9		aco1	A0A498MTB1		prdx4	A0A498L8V5
rabac1	A0A498LFD3		rps19	A0A498LRA6		ddx1	A0A498LFM1		ndrg3	A0A498P389		hars	A0A498NES3		rps9	A0A498NIR7		psma2	A0A498MW39		snrnp200	A0A498MF00		gmfb	A0A498LA25		psmd3	A0A498M9B4		nedd8	A0A498MPI0		lyn	A0A498LJJ7		slc9b2	A0A498ML40		kpna3	A0A498NKE3		ruvbl2	A0A498LQK9
wdr76	A0A498LFG4		hexdc	A0A498LRC0		nploc4	A0A498LR06		aire	A0A498LNQ2		aldob	A0A498LLJ4		psmd3	A0A498M9B4		tbl1xr1	A0A498MPR5		rps16	A0A498LS35		atp6v1g1	A0A498M939		rab25	A0A498NRK4		pura	A0A498ND90		cdk4	A0A498NJ42		gbe1	A0A498NYQ1		stau1	A0A498NZY2		hibadh	A0A498NNB9
sltm	A0A498LFH3		znf346	A0A498LRE1		cops5	A0A498MZ60		eppk1	A0A498NQT4		abce1	A0A498NQD7		rab25	A0A498NRK4		psma3	A0A498MDK5		rps6ka3	A0A498MVB5		uchl5	A0A498MAE5		ctr9	A0A498N271		znf592	A0A498LAI4		cdk1	A0A498NU75		abat	A0A498NBJ5		tial1	A0A498NXY1		snrpf	A0A498MPZ9
sdf2l1	A0A498LFI5		bcam	A0A498LRE4		RDX	A0A498NQF9		rpl15	A0A498LVN5		camk2a	A0A498N294		ctr9	A0A498N271		psme2	A0A498NMM5		prdx1	A0A498M0B1		ddx41	A0A498ND57		hmgb2	A0A498LD75		dars	A0A498N790		cdk14	A0A498LAD3		cp	A0A498MX98		tia1	A0A498MJQ9		psma2	A0A498MW39
eif3e	A0A498LFI9		edf1	A0A498LRJ3		smc1a	A0A498LVV3		ldhb	A0A498MKB6		rps18	A0A498MD37		sf3b1	A0A498NAS7		psme1	A0A498N022		camk2d	A0A498NIW6		rpl26l1	A0A498ND70		myl4	A0A498MJ94		ank1	A0A498NBP4		lck	A0A498NCM9		aars	A0A498MDH5		gtpbp1	A0A498LB06		psmd3	A0A498M9B4
fhit	A0A498LFJ1		ppp2r4	A0A498LRM8		psma1	A0A498LVZ6		tmed7	A0A498N8R8		dpp9	A0A498LWR2		mccc1	A0A498MVF3		acadvl	A0A498MKU0		usp7	A0A498NBJ7		rps9	A0A498NIR7		fbxo22	A0A498LC85		cat	A0A498N4M9		cdk16	A0A498M7X4		sec23b	A0A498N4Q4		atp6v1g1	A0A498M939		snx29	A0A498L965
PTGFRN	A0A498LFK1		vil1	A0A498LRR3		cs	A0A498LAX4		rpl5	A0A498M2R0		prpf4	A0A498MDU5		tardbp	A0A498LTK5		iqgap1	A0A498MM11		nbea	A0A498LCP9		lsm7	A0A498NBE3		lactb	A0A498MZD1		pip4k2a	A0A498L6U4		fgr	A0A498N3G4		gatm	A0A498MHC3		uchl5	A0A498MAE5		dhx15	A0A498MH82
eif4e	A0A498LFK8		VWA5A	A0A498LRS0		sf3b1	A0A498NAS7		copb1	A0A498MP80		cars	A0A498LSF8		dhx9	A0A498MI27		rbbp4	A0A498MLJ2		lrba	A0A498N1C2		ilf3	A0A498NVH4		xpo7	A0A498MMK2		acaa2	A0A498NHY4		cdk6	A0A498N709		fermt2	A0A498N232		eif3b	A0A498L933		rprd1b	A0A498NRW2
tcea1	A0A498LFL4		ublcp1	A0A498LRX4		kif2a	A0A498NYD1		atad2	A0A498MTZ4		SNX2	A0A498N6C7		psma5	A0A498NQY9		magoh	A0A498NRF7		glyr1	A0A498NI11		psmd3	A0A498M9B4		psmc3	A0A498MJ03		cdk16	A0A498M7X4		ube2n	A0A498N6E6		AGO3	A0A498M6D2		rpl26l1	A0A498ND70		psme2	A0A498NMM5
tcea2	A0A498LS47		rps16	A0A498LS35		aifm1	A0A498NF81		krt8	A0A498LUC6		dld	A0A498LAH2		lactb	A0A498MZD1		crkl	A0A498N553		ddi2	A0A498L5Z7		rab25	A0A498NRK4		rpl8	A0A498N3G7		fgr	A0A498N3G4		tagap	A0A498NFZ5		AGO1	A0A498MHI7		ywhah	A0A498MXB4		psme1	A0A498N022
ndrg2	A0A498LFM0		frmd6	A0A498LS50		gmpr2	A0A498MKE8		kcnh6	A0A498NMG8		lmnb1	A0A498LZD2		fbxo22	A0A498LC85		p4hb	A0A498M105		nup93	A0A498MB05		psma5	A0A498NQY9		slc25a11	A0A498M5Q7		cdk6	A0A498N709		magoh	A0A498NRF7		AGO2	A0A498MVZ4		gcfc2	A0A498MHT5		acadvl	A0A498MKU0
ddx1	A0A498LFM1		pawr	A0A498LS91		gmpr	A0A498MVQ2		nsf	A0A498NMX0		cops4	A0A498MM59		xpo7	A0A498MMK2		glod4	A0A498L6A7		eef1g	A0A498NTK4		myl4	A0A498MJ94		wbscr17	A0A498L6I4		cdk14	A0A498LAD3		chp1	A0A498LVS8		AGO4	A0A498N3A3		ywhaz	A0A498LYK8		rusc1	A0A498M085
ppl	A0A498NI43		MARC2	A0A498LSC4		snd1	A0A498MKL8		pygb	A0A498P430		papss1	A0A498LNF8		rpl8	A0A498N3G7		ppp2r2d	A0A498LGJ5		ppa1	A0A498LL47		fbxo22	A0A498LC85		actr3b	A0A498NRS4		lck	A0A498NCM9		ilf2	A0A498NBZ6		arf6	A0A498NTC1		rps9	A0A498NIR7		p4hb	A0A498M105
dbi	A0A498LFM5		npc2	A0A498LSC6		dhx15	A0A498MH82		pygl	A0A498LA35		aars	A0A498MDH5		slc25a11	A0A498M5Q7		uso1	A0A498NFH4		igf2bp3	A0A498NAX1		lactb	A0A498MZD1		mcu	A0A498N0B1		lyn	A0A498LJJ7		bzw1	A0A498LKG8		vps29	A0A498NKF0		prdx1	A0A498M0B1		glod4	A0A498L6A7
plekhf2	A0A498LFM9		cars	A0A498LSF8		akt2	A0A498MFH8		gcfc2	A0A498MHT5		MAP1A	A0A498MEJ1		wbscr17	A0A498L6I4		sf3b1	A0A498NAS7		psmc3	A0A498MJ03		xpo7	A0A498MMK2		rps19	A0A498LRA6		cdk4	A0A498NJ42		aph1a	A0A498LY90		aco1	A0A498MTB1		lsm7	A0A498NBE3		shmt1	A0A498L5W2
ppm1f	A0A498LFN2		cdk5rap3	A0A498LSG3		akt1	A0A498NSQ3		rpl12	A0A498LPL3		gpi	A0A498MUB2		mcu	A0A498N0B1		srm	A0A498LY23		map2k2	A0A498NGW6		psmc3	A0A498MJ03		rps28	A0A498P454		cdk1	A0A498NU75		eprs	A0A498LPV0		tial1	A0A498NXY1		ilf3	A0A498NVH4		cstf3	A0A498NC45
thoc7	A0A498LFQ3		hnrnpa1	A0A498LSH0		prkacb	A0A498NE56		cs	A0A498LAX4		ruvbl2	A0A498LQK9		rps19	A0A498LRA6		cspg5	A0A498NKU3		srp54	A0A498MQC4		rpl8	A0A498N3G7		nedd8	A0A498MPI0		ube2n	A0A498N6E6		krt18	A0A498L7I0		tia1	A0A498MJQ9		psmd3	A0A498M9B4		cdc16	A0A498N748
emc2	A0A498LFR4		pxn	A0A498LSP3		erh	A0A498LGY3		hars	A0A498NES3		tubg1	A0A498MG41		hnrnpk	A0A498NGQ1		psmd12	A0A498MYH7		snd1	A0A498MKL8		atad3a	A0A498MCP4		pura	A0A498LGN8		magoh	A0A498NRF7		ywhaz	A0A498LYK8		sec24d	A0A498NJ66		rab25	A0A498NRK4		dcun1d1	A0A498NTJ8
CASR	A0A498LFT2		nab2	A0A498LSV1		pccb	A0A498P434		prpf8	A0A498LH59		ilf3	A0A498NVH4		rps28	A0A498P454		rpl23a	A0A498NCC9		bcas2	A0A498P2D9		stoml2	A0A498MJ13		stt3a	A0A498MJ33		ilf2	A0A498NBZ6		ywhah	A0A498MXB4		sel1l	A0A498N1D0		ctr9	A0A498N271		rpl23a	A0A498NCC9
glrx3	A0A498LFT5		csrp3	A0A498LSX4		ssu72	A0A498L4V5		aldob	A0A498LLJ4		kpna4	A0A498M1B8		nedd8	A0A498MPI0		dnm1	A0A498N471		chmp4b	A0A498N7K0		slc25a11	A0A498M5Q7		ybx1	A0A498LW12		chp1	A0A498LVS8		atp6v1h	A0A498MJS7		ank3	A0A498NCQ5		tardbp	A0A498LTK5		srm	A0A498LY23
espnl	A0A498LFU9		psmd14	A0A498LT27		BCKDHB	A0A498ME07		gsn	A0A498NKF8		dhx9	A0A498MI27		pura	A0A498LGN8		vps35	A0A498MDH6		nsfl1c	A0A498LA40		wbscr17	A0A498L6I4		znf592	A0A498LAI4		aph1a	A0A498LY90		TMEM200B	A0A498NPL1		nsf	A0A498NMX0		arpc4	A0A498MR69		cspg5	A0A498NKU3
kif13b	A0A498LM25		gstm3	A0A498LT46		arcn1	A0A498N7H4		slc2a2	A0A498LBV9		HSPA4L	A0A498LWX6		stt3a	A0A498MJ33		sugt1	A0A498NED4		paics	A0A498MUQ6		mcu	A0A498N0B1		dars	A0A498N790		krt18	A0A498L7I0		atp6v0d1	A0A498MIE0		atp6v1g1	A0A498M939		psma5	A0A498NQY9		btf3l4	A0A498NJ63
kif1a	A0A498MDU7		gdi1	A0A498LTB6		uba2	A0A498M1Y0		abce1	A0A498NQD7		DYNC1H1	A0A498LBI5		znf592	A0A498LAI4		cstf3	A0A498NC45		CSNK2A1	A0A498LV59		rps19	A0A498LRA6		C18orf32	A0A498N8N2		ywhaz	A0A498LYK8		rab35	A0A498MWD3		uchl5	A0A498MAE5		myl4	A0A498MJ94		ube2n	A0A498N6E6
prpf40a	A0A498LFV9		copz1	A0A498LTD9		rad21	A0A498MSE0		srsf3	A0A498MV30		rps6ka3	A0A498MVB5		dars	A0A498N790		syt1	A0A498LTH2		eif3g	A0A498L7T5		rps28	A0A498P454		cat	A0A498N4M9		ywhah	A0A498MXB4		rab15	A0A498M7U6		rpl26l1	A0A498ND70		lactb	A0A498MZD1		ube2m	A0A498MC44
mis18a	A0A498LFX2		timm8b	A0A498LTE7		RPL37A	A0A498MNH9		chd4	A0A498NJC5		camk2d	A0A498NIW6		rpl32	A0A498MLZ6		capns1	A0A498LHL4		gpi	A0A498MUB2		nedd8	A0A498MPI0		acaa2	A0A498NHY4		add2	A0A498NGA5		GNAL	A0A498L2H9		rps9	A0A498NIR7		fbxo22	A0A498LC85		cct8	A0A498LH60
cnot10	A0A498LG34		thap4	A0A498LTF9		myo5b	A0A498MYA4		camk2a	A0A498N294		naa15	A0A498N8D7		acaa2	A0A498NHY4		ube2v1	A0A498LTN4		fubp3	A0A498MUZ4		pura	A0A498LGN8		cdk4	A0A498NJ42		atp6v1h	A0A498MJS7		gnat1	A0A498LDI3		ilf3	A0A498NVH4		xpo7	A0A498MMK2		capns1	A0A498LHL4
rdh8	A0A498LG55		myl6	A0A498LTG0		atp2b2	A0A498NJB6		dpp9	A0A498LWR2		igf2bp3	A0A498NAX1		cdk16	A0A498M7X4		top2a	A0A498NT58		ctsd	A0A498LV43		stt3a	A0A498MJ33		cdk1	A0A498NU75		TMEM200B	A0A498NPL1		gnat2	A0A498NBP1		psmd3	A0A498M9B4		rpl8	A0A498N3G7		ube2v1	A0A498LTN4
kiaa1715	A0A498LG57		fabp7	A0A498LTJ0		atp2b4	A0A498LE85		pfkp	A0A498LU01		srp54	A0A498MQC4		fgr	A0A498N3G4		sh3glb2	A0A498LRN4		kcnh4	A0A498LZM8		znf592	A0A498LAI4		lyn	A0A498LJJ7		atp6v0d1	A0A498MIE0		atp5c1	A0A498LI09		rab25	A0A498NRK4		atad3a	A0A498MCP4		rbbp4	A0A498MLJ2
lnpb	A0A498NNC2		RAB37	A0A498LTK1		slc9b2	A0A498ML40		gnpda2	A0A498NET5		chmp4b	A0A498N7K0		cdk6	A0A498N709		acot7	A0A498LYK0		rab5a	A0A498MZU2		dars	A0A498N790		cdk14	A0A498LAD3		rab15	A0A498M7U6		atad3a	A0A498MCP4		arpc4	A0A498MR69		stoml2	A0A498MJ13		fh	A0A498LTT9
pygl	A0A498LA35		tardbp	A0A498LTK5		slc38a7	A0A498MQJ7		ap1s1	A0A498MJV6		nsfl1c	A0A498LA40		cdk14	A0A498LAD3		eprs	A0A498LPV0		ppp2r5d	A0A498MHL4		ank1	A0A498NBP4		lck	A0A498NCM9		gnat2	A0A498NBP1		myo7a	A0A498NUD1		psma5	A0A498NQY9		slc25a11	A0A498M5Q7		set	A0A498NHZ1
pygm	A0A498MJP2		mapk12	A0A498LTL2		ppp2r4	A0A498LRM8		psmb4	A0A498NBJ4		dazap1	A0A498NJ14		lck	A0A498NCM9		gars	A0A498NS73		golga3	A0A498NG76		aldoc	A0A498M0I3		cdk16	A0A498M7X4		GNAL	A0A498L2H9		myo6	A0A498MBZ1		myl4	A0A498MJ94		kdm1a	A0A498MN14		kdm1a	A0A498MN14
golga1	A0A498NMA7		spcs2	A0A498LTL5		npepps	A0A498L5J2		AP3S1	A0A498NA52		wdr34	A0A498LXI4		cdk4	A0A498NJ42		cct7	A0A498NUZ4		pdia3	A0A498MDR7		hkdc1	A0A498N424		fgr	A0A498N3G4		gnat1	A0A498LDI3		myo1e	A0A498L7R8		lactb	A0A498MZD1		wbscr17	A0A498L6I4		atmin	A0A498LLW6
pygb	A0A498P430		ube2v1	A0A498LTN4		EML4	A0A498MVJ2		cars	A0A498LSF8		tbc1d1	A0A498L925		lyn	A0A498LJJ7		atmin	A0A498LLW6		eif3a	A0A498L5W0		acaa2	A0A498NHY4		cdk6	A0A498N709		c1qbp	A0A498NKL6		tln2	A0A498MVU2		fbxo22	A0A498LC85		actr3b	A0A498NRS4		ipo5	A0A498NA00
cops7a	A0A498LG70		hnrnpd	A0A498LTP4		ank2	A0A498NIJ5		SNX2	A0A498N6C7		pgm2	A0A498N046		tagap	A0A498NFZ5		snrnp200	A0A498MF00		uchl5	A0A498MAE5		cdk4	A0A498NJ42		ube2n	A0A498N6E6		atp5c1	A0A498LI09		iqgap1	A0A498MM11		rpl8	A0A498N3G7		mcu	A0A498N0B1		snrnp200	A0A498MF00
toe1	A0A498LGC2		nid2	A0A498LTT6		ank3	A0A498P2Z0		dld	A0A498LAH2		paics	A0A498MUQ6		RDX	A0A498NQF9		cpne3	A0A498N8C4		rpl23a	A0A498NCC9		cdk1	A0A498NU75		magoh	A0A498NRF7		tln2	A0A498MVU2		cct7	A0A498NUZ4		slc25a11	A0A498M5Q7		rps19	A0A498LRA6		cpne3	A0A498N8C4
galnt7	A0A498LGC3		fh	A0A498LTT9		pgm3	A0A498N0K6		lmnb1	A0A498LZD2		gars	A0A498NS73		magoh	A0A498NRF7		ak2	A0A498LIT6		dars	A0A498N790		lyn	A0A498LJJ7		chp1	A0A498LVS8		cct7	A0A498NUZ4		erlin2	A0A498N7A4		wbscr17	A0A498L6I4		nedd8	A0A498MPI0		pfdn1	A0A498NYC1
slco2b1	A0A498LGC6		INPP1	A0A498LTV9		gbe1	A0A498NYQ1		pak1	A0A498NT33		acat1	A0A498MP51		ilf2	A0A498NBZ6		snx6	A0A498MDJ5		strap	A0A498M9M9		cdk14	A0A498LAD3		ilf2	A0A498NBZ6		erlin2	A0A498N7A4		GLDC	A0A498MTC9		rps19	A0A498LRA6		pura	A0A498LGN8		pls3	A0A498MZT6
C5orf22	A0A498LGD0		cttn	A0A498LTW8		abat	A0A498NBJ5		cct8	A0A498LH60		eif3g	A0A498L7T5		aph1a	A0A498LY90		psme3	A0A498LWL0		g3bp1	A0A498NTC7		lck	A0A498NCM9		clgn	A0A498MT53		GLDC	A0A498MTC9		acly	A0A498LWG6		hnrnpk	A0A498NGQ1		dars	A0A498N790		add3	A0A498LDW5
mat2b	A0A498LGG2		rars	A0A498LTZ7		cp	A0A498MX98		rpl18	A0A498NPB6		ipo7	A0A498MKX6		rab8a	A0A498N908		mvd	A0A498MM36		rpl5	A0A498M2R0		cdk16	A0A498M7X4		aph1a	A0A498LY90		MAP1B	A0A498N3F6		MAP1B	A0A498N3F6		rps28	A0A498P454		cat	A0A498N4M9		add1	A0A498N6U6
eny2	A0A498LGH4		bdh1	A0A498LTZ8		aars	A0A498MDH5		cluh	A0A498LHF1		ctsd	A0A498LV43		eprs	A0A498LPV0		gmfb	A0A498LA25		psmb1	A0A498N6J0		fgr	A0A498N3G4		eprs	A0A498LPV0		prkcd	A0A498L5W8		prkcd	A0A498L5W8		pura	A0A498LGN8		cdk16	A0A498M7X4		zmpste24	A0A498NCP1
HSH2D	A0A498LGK2		sec31b	A0A498LU62		fermt2	A0A498N232		rpl7	A0A498LJU3		fam171a1	A0A498NCE6		krt18	A0A498L7I0		picalm	A0A498LLQ2		dpp3	A0A498N600		cdk6	A0A498N709		krt18	A0A498L7I0		lancl1	A0A498MFQ8		myl1	A0A498NHU8		stt3a	A0A498MJ33		fgr	A0A498N3G4		rpl13a	A0A498NBD8
atpaf2	A0A498LGK7		acss2	A0A498LU80		sec13	A0A498MAC6		psmc4	A0A498NK57		sf3b3	A0A498MBG5		ywhaz	A0A498LYK8		snap91	A0A498NIL3		hnrnpdl	A0A498LUJ4		ube2n	A0A498N6E6		ywhaz	A0A498LYK8		myl6	A0A498LTG0		lancl1	A0A498MFQ8		znf592	A0A498LAI4		cdk6	A0A498N709		cops4	A0A498MM59
EPB41L2	A0A498LGM2		gnmt	A0A498LU93		AGO3	A0A498M6D2		psmd14	A0A498LT27		golga3	A0A498NG76		ywhah	A0A498MXB4		mta2	A0A498LCW4		lasp1	A0A498LWE3		magoh	A0A498NRF7		ywhah	A0A498MXB4		myl3	A0A498M9S8		myl6	A0A498LTG0		dars	A0A498N790		cdk14	A0A498LAD3		got1	A0A498LHI8
purb	A0A498LFH6		krt8	A0A498LUC6		AGO1	A0A498MHI7		aars	A0A498MDH5		pdia3	A0A498MDR7		smarca4	A0A498MI78		snd1	A0A498MKL8		ckm	A0A498LPZ0		chp1	A0A498LVS8		atp6v1h	A0A498MJS7		myl1	A0A498NHU8		myl3	A0A498M9S8		ank1	A0A498NBP4		lck	A0A498NCM9		ak2	A0A498LIT6
pura	A0A498LGN8		enoph1	A0A498LUE7		AGO2	A0A498MVZ4		MAP1A	A0A498MEJ1		usp7	A0A498NBJ7		smarca2	A0A498NQS2		CSNK2A1	A0A498LV59		hsd17b10	A0A498LBK9		ilf2	A0A498NBZ6		TMEM200B	A0A498NPL1		ppib	A0A498LAB9		hnrnph1	A0A498ND79		cat	A0A498N4M9		lyn	A0A498LJJ7		ptpra	A0A498NKD0
purg	A0A498LUM9		zpr1	A0A498LUF5		AGO4	A0A498N3A3		MAP1B	A0A498N3F6		CSNK2A1	A0A498LV59		atp6v1h	A0A498MJS7		HSPA4L	A0A498LWX6		ddx1	A0A498LFM1		aph1a	A0A498LY90		atp6v0d1	A0A498MIE0		cbx5	A0A498LXY4		ppib	A0A498LAB9		aldoc	A0A498M0I3		cdk4	A0A498NJ42		vbp1	A0A498MJQ0
parp1	A0A498LGP1		auh	A0A498LUF6		arf6	A0A498NTC1		ruvbl2	A0A498LQK9		dars	A0A498N790		TMEM200B	A0A498NPL1		fh	A0A498LTT9		vps4b	A0A498N0L6		eprs	A0A498LPV0		rab15	A0A498M7U6		rpl11	A0A498N3H4		hspa9	A0A498N369		hkdc1	A0A498N424		ube2n	A0A498N6E6		gmfb	A0A498LA25
gnl2	A0A498LGP6		sdcbp	A0A498LUF9		aco1	A0A498MTB1		ilf3	A0A498NVH4		etf1	A0A498N525		atp6v0d1	A0A498MIE0		elavl3	A0A498MPM9		vps4a	A0A498NFE0		ANK2	A0A498MI53		GNAL	A0A498L2H9		dhcr7	A0A498MK08		rpl11	A0A498N3H4		aldh3b1	A0A498N2C4		magoh	A0A498NRF7		strap	A0A498M9M9
PTGR2	A0A498LGQ8		ace	A0A498LUH0		tubg1	A0A498MG41		hspb1	A0A498NLH3		gmds	A0A498MX26		rab15	A0A498M7U6		elavl4	A0A498NS54		prdx4	A0A498L8V5		krt18	A0A498L7I0		gnat1	A0A498LDI3		ndrg3	A0A498P389		dhcr7	A0A498MK08		rpl32	A0A498MLZ6		ilf2	A0A498NBZ6		rtcb	A0A498N2H4
zdhhc24	A0A498LGT2		ppp2cb	A0A498LUI2		uba3	A0A498N2I6		rps16	A0A498LS35		g3bp1	A0A498NTC7		GNAL	A0A498L2H9		elavl2	A0A498NML0		rtcb	A0A498N2H4		ywhaz	A0A498LYK8		gnat2	A0A498NBP1		aire	A0A498LNQ2		psmd14	A0A498LT27		acaa2	A0A498NHY4		aph1a	A0A498LY90		rpl35	A0A498MJY6
snf8	A0A498LGX1		hnrnpdl	A0A498LUJ4		tial1	A0A498NXY1		prdx1	A0A498M0B1		park7	A0A498LYB8		gnat1	A0A498LDI3		sept2	A0A498MAB6		abce1	A0A498NQD7		ywhah	A0A498MXB4		myo6	A0A498MBZ1		eppk1	A0A498NQT4		eef1g	A0A498NTK4		cdk4	A0A498NJ42		slc25a3	A0A498NRX4		rpl31	A0A498MC52
ckm	A0A498LGX8		best2	A0A498LUM0		tia1	A0A498MJQ9		camk2d	A0A498NIW6		rpl5	A0A498M2R0		gnat2	A0A498NBP1		sept6	A0A498LGV3		hibadh	A0A498NNB9		smarca4	A0A498MI78		atp5c1	A0A498LI09		ppfia3	A0A498L2E3		tars	A0A498NQZ7		cdk1	A0A498NU75		eprs	A0A498LPV0		ppp2r2d	A0A498LGJ5
erh	A0A498LGY3		mdh1	A0A498LUN9		rab4a	A0A498MY60		glyr1	A0A498NI11		psmb1	A0A498N6J0		slc25a13	A0A498N6M3		rpl18	A0A498NPB6		cstf3	A0A498NC45		smarca2	A0A498NQS2		YBX2	A0A498M3Z6		ppfia4	A0A498LE25		tarsl2	A0A498MG49		lyn	A0A498LJJ7		krt18	A0A498L7I0		copg2	A0A498M9V6
xrcc6	A0A498LGY5		akt3	A0A498LUS8		dip2c	A0A498NP89		rsu1	A0A498N579		dpp3	A0A498N600		kras	A0A498MKW9		ckb	A0A498MSZ6		snrpf	A0A498MPZ9		TMEM200B	A0A498NPL1		calr3	A0A498MMJ7		ppfia2	A0A498LVU0		pgrmc1	A0A498LQK2		cdk14	A0A498LAD3		rras	A0A498NPH6		sept2	A0A498MAB6
slc22a2	A0A498LH11		rdh12	A0A498LUW8		map3k5	A0A498LHP5		eef1g	A0A498NTK4		ppp2r2d	A0A498LGJ5		nras	A0A498LVZ1		gnpda2	A0A498NET5		psma2	A0A498MW39		atp6v0d1	A0A498MIE0		myo7a	A0A498NUD1		plekhm2	A0A498MXX3		psmb10	A0A498P5Y7		lck	A0A498NCM9		tub	A0A498MYE8		prdx2	A0A498LM50
tsr1	A0A498LH19		RPS3A	A0A498LV15		gmfb	A0A498LA25		igf2bp3	A0A498NAX1		lasp1	A0A498LWE3		c1qbp	A0A498NKL6		copa	A0A498LPI1		fermt3	A0A498N227		rab15	A0A498M7U6		myo1e	A0A498L7R8		nckap1	A0A498N459		ndrg3	A0A498P389		cdk16	A0A498M7X4		atp6v1h	A0A498MJS7		prpf8	A0A498LH59
ccdc9	A0A498LH28		rbp7	A0A498LV21		GMFG	A0A498L6I2		map2k2	A0A498NGW6		ckm	A0A498LPZ0		atp5c1	A0A498LI09		golga3	A0A498NG76		eftud2	A0A498M6Y5		GNAL	A0A498L2H9		tln2	A0A498MVU2		rpl15	A0A498LVN5		PRKAR2B	A0A498MN60		fgr	A0A498N3G4		TMEM200B	A0A498NPL1		gnpda2	A0A498NET5
msi1	A0A498LH33		ctsd	A0A498LV43		wnk2	A0A498N2P5		srp54	A0A498MQC4		hsd17b10	A0A498LBK9		cab39l	A0A498NJV9		uap1	A0A498NU86		wdr34	A0A498LXI4		gnat1	A0A498LDI3		iqgap1	A0A498MM11		ldhb	A0A498MKB6		aire	A0A498LNQ2		cdk6	A0A498N709		atp6v0d1	A0A498MIE0		golga3	A0A498NG76
dph1	A0A498LH34		ppfibp1	A0A498LV52		atp6v1g1	A0A498M939		upf1	A0A498NMU3		vps4b	A0A498N0L6		kif5b	A0A498M763		DHX35	A0A498MG05		psme2	A0A498NMM5		gnat2	A0A498NBP1		cct7	A0A498NUZ4		tmed7	A0A498N8R8		eppk1	A0A498NQT4		ube2n	A0A498N6E6		wdr34	A0A498LXI4		ctnna2	A0A498MTB9
agpat4	A0A498LH37		CSNK2A1	A0A498LV59		uchl5	A0A498MAE5		chmp4b	A0A498N7K0		vps4a	A0A498NFE0		tln2	A0A498MVU2		klc1	A0A498MWF4		psme1	A0A498N022		c1qbp	A0A498NKL6		erlin2	A0A498N7A4		ttc39a	A0A498NRY0		rpl15	A0A498LVN5		tagap	A0A498NFZ5		set	A0A498NHZ1		srsf2	A0A498LSM2
prkag1	A0A498LH41		rbp4	A0A498LVA3		rpl26l1	A0A498ND70		psmd1	A0A498MYM2		rtcb	A0A498N2H4		UBE2O	A0A498M5K6		grpel1	A0A498MDZ5		kpna4	A0A498M1B8		atp5c1	A0A498LI09		pygl	A0A498LA35		calr3	A0A498MMJ7		ldhb	A0A498MKB6		magoh	A0A498NRF7		rab15	A0A498M7U6		gmpr2	A0A498MKE8
scarf1	A0A498LH50		rab18	A0A498LVL4		rps9	A0A498NIR7		nsfl1c	A0A498LA40		snw1	A0A498NLB3		cct7	A0A498NUZ4		ctnna2	A0A498MTB9		acadvl	A0A498MKU0		cab39l	A0A498NJV9		prkcb	A0A498NMH1		copb1	A0A498MP80		ttc39a	A0A498NRY0		chp1	A0A498LVS8		gnat1	A0A498LDI3		pcmt1	A0A498MN94
LGALS3	A0A498LH57		nid1	A0A498LVN4		ilf3	A0A498NVH4		aldh1a2	A0A498L6Y8		rps16	A0A498LS35		erlin2	A0A498N7A4		smc1a	A0A498LVV3		g6pd	A0A498NGC9		tln2	A0A498MVU2		prkcd	A0A498L5W8		dbnl	A0A498NAE7		calr3	A0A498MMJ7		ilf2	A0A498NBZ6		GNAL	A0A498L2H9		hadha	A0A498LIF2
cct8	A0A498LH60		rpl15	A0A498LVN5		psmd3	A0A498M9B4		paics	A0A498MUQ6		aldh18a1	A0A498LMW6		prkcd	A0A498L5W8		srsf2	A0A498LSM2		eif3d	A0A498NJK1		iqgap1	A0A498MM11		myl1	A0A498NHU8		atad2	A0A498MTZ4		dbnl	A0A498NAE7		aph1a	A0A498LY90		gnat2	A0A498NBP1		psmb6	A0A498LJQ3
blmh	A0A498LH75		mgat4d	A0A498LVP1		rab25	A0A498NRK4		nudc	A0A498NQC1		hibadh	A0A498NNB9		ppib	A0A498LAB9		atp6v1c1	A0A498N769		prps1	A0A498MZJ1		erlin2	A0A498N7A4		lancl1	A0A498MFQ8		krt8	A0A498LUC6		atad2	A0A498MTZ4		slc25a3	A0A498NRX4		c1qbp	A0A498NKL6		cct5	A0A498LK15
ptrh2	A0A498LH90		hspg2	A0A498LVR7		ctr9	A0A498N271		best2	A0A498LUM0		cct8	A0A498LH60		ube2n	A0A498N6E6		hadha	A0A498LIF2		nit2	A0A498LLS5		MAP1B	A0A498N3F6		myl6	A0A498LTG0		kcnh6	A0A498NMG8		krt8	A0A498LUC6		eprs	A0A498LPV0		atp5c1	A0A498LI09		fscn2	A0A498MVZ0
rap1gap2	A0A498LH94		anxa6	A0A498LVS6		mccc1	A0A498MVF3		ipo7	A0A498MKX6		rbms2	A0A498NJG1		eef1g	A0A498NTK4		cops4	A0A498MM59		crkl	A0A498N553		lancl1	A0A498MFQ8		myl3	A0A498M9S8		ITIH4	A0A498NX86		kcnh6	A0A498NMG8		ANK2	A0A498MI53		calr3	A0A498MMJ7		inpp5d	A0A498L8Q0
snx12	A0A498LH99		chp1	A0A498LVS8		rap2a	A0A498LG39		abcf2	A0A498M8N9		psma2	A0A498MW39		RAP1GDS1	A0A498NIT8		snrpb	A0A498NF52		p4hb	A0A498M105		myl6	A0A498LTG0		ppib	A0A498LAB9		itih3	A0A498MUL6		ITIH4	A0A498NX86		krt18	A0A498L7I0		kif5b	A0A498M763		NAPSA	A0A498NLQ0
snx3	A0A498LKX7		gnai1	A0A498LVT1		psma5	A0A498NQY9		gpi	A0A498MUB2		crk	A0A498LHE2		tarsl2	A0A498MG49		bub3	A0A498LL89		glod4	A0A498L6A7		myl3	A0A498M9S8		ergic1	A0A498MW07		wnk2	A0A498N2P5		itih3	A0A498MUL6		ywhaz	A0A498LYK8		tln2	A0A498MVU2		SUCLA2	A0A498NNW1
clint1	A0A498LHC0		smc1a	A0A498LVV3		fbxo22	A0A498LC85		ctsd	A0A498LV43		clic4	A0A498NCC7		tars	A0A498NQZ7		acat1	A0A498MP51		ppp2r2d	A0A498LGJ5		myl1	A0A498NHU8		psmd14	A0A498LT27		add1	A0A498N6U6		wnk2	A0A498N2P5		ywhah	A0A498MXB4		UBE2O	A0A498M5K6		cfl2	A0A498MQK3
cluh	A0A498LHF1		khdrbs1	A0A498LVV4		lactb	A0A498MZD1		KATNAL1	A0A498M7J9		tbl1xr1	A0A498MPR5		scin	A0A498MSB3		ptbp1	A0A498LJP8		drg1	A0A498NSN9		hnrnph1	A0A498ND79		eef1g	A0A498NTK4		prdx2	A0A498LM50		pygb	A0A498P430		atp6v1h	A0A498MJS7		iqgap1	A0A498MM11		RAB37	A0A498LTK1
ank2	A0A498LHF3		marcksl1	A0A498LVW9		rpl8	A0A498N3G7		sf3b3	A0A498MBG5		prkcd	A0A498L5W8		CLTCL1	A0A498NHX3		ptbp3	A0A498MJ90		ap3m1	A0A498NZ89		ppib	A0A498LAB9		tarsl2	A0A498MG49		prdx1	A0A498M0B1		pygl	A0A498LA35		TMEM200B	A0A498NPL1		cct7	A0A498NUZ4		rab27b	A0A498N7M2
ndufaf6	A0A498LHF5		angptl7	A0A498LVX8		slc25a11	A0A498M5Q7		golga3	A0A498NG76		prkce	A0A498LSA7		pgrmc1	A0A498LQK2		ehd3	A0A498LKP9		ap3m2	A0A498NGD5		hspa9	A0A498N369		tars	A0A498NQZ7		top2b	A0A498LY18		gcfc2	A0A498MHT5		atp6v0d1	A0A498MIE0		AGO3	A0A498M6D2		rab30	A0A498MYA6
shoc2	A0A498LHG9		TMEM263	A0A498LVY2		wbscr17	A0A498L6I4		pdia3	A0A498MDR7		prkca	A0A498MTD2		ndrg3	A0A498P389		add1	A0A498N6U6		pak2	A0A498MHP4		ergic1	A0A498MW07		scin	A0A498MSB3		top2a	A0A498NT58		rpl12	A0A498LPL3		rab15	A0A498M7U6		AGO2	A0A498MVZ4		rab27a	A0A498NT07
got1	A0A498LHI8		nras	A0A498LVZ1		actr3b	A0A498NRS4		usp7	A0A498NBJ7		prkcb	A0A498NMH1		eppk1	A0A498NQT4		cyfip2	A0A498LPC1		srm	A0A498LY23		CLTCL1	A0A498NHX3		prkca	A0A498MTD2		grpel1	A0A498MDZ5		NKPD1	A0A498NRI4		gnat2	A0A498NBP1		pygl	A0A498LA35		rab4a	A0A498MY60
bves	A0A498LHJ8		psma1	A0A498LVZ6		mcu	A0A498N0B1		CSNK2A1	A0A498LV59		prkcq	A0A498LHZ9		cat	A0A498N4M9		dhx15	A0A498MH82		cspg5	A0A498NKU3		eef1g	A0A498NTK4		pgrmc1	A0A498LQK2		pygb	A0A498P430		hars	A0A498NES3		GNAL	A0A498L2H9		GLDC	A0A498MTC9		rab3c	A0A498NR85
capns1	A0A498LHL4		gstz1	A0A498LVZ9		rps19	A0A498LRA6		rpl23a	A0A498NCC9		psme1	A0A498N022		rpl15	A0A498LVN5		luc7l3	A0A498LY40		psmd12	A0A498MYH7		tarsl2	A0A498MG49		rab18	A0A498LVL4		pygl	A0A498LA35		prpf8	A0A498LH59		gnat1	A0A498LDI3		plekhm3	A0A498N4I9		rab9a	A0A498NNX0
map3k5	A0A498LHP5		ybx1	A0A498LW12		hnrnpk	A0A498NGQ1		dars	A0A498N790		dnm2	A0A498M3Y7		ldhb	A0A498MKB6		fscn2	A0A498MVZ0		btf3l4	A0A498NJ63		tars	A0A498NQZ7		picalm	A0A498LLQ2		gcfc2	A0A498MHT5		aldob	A0A498LLJ4		myo6	A0A498MBZ1		myl1	A0A498NHU8		rab4b	A0A498M0T0
tagln3	A0A498NRS5		tln1	A0A498LW71		rps28	A0A498P454		strap	A0A498M9M9		acadvl	A0A498MKU0		rpl5	A0A498M2R0		rpl26l1	A0A498ND70		pfkfb2	A0A498LRR2		prkca	A0A498MTD2		aire	A0A498LNQ2		rpl12	A0A498LPL3		gsn	A0A498NKF8		atp5c1	A0A498LI09		lancl1	A0A498MFQ8		rab12	A0A498MTM6
rpa1	A0A498LHR7		ankrd55	A0A498LW93		nedd8	A0A498MPI0		pdcd6ip	A0A498NAQ7		g6pd	A0A498NGC9		ttc39a	A0A498NRY0		epb41	A0A498NQS7		uroc1	A0A498LEI0		pgrmc1	A0A498LQK2		iqgap2	A0A498NQN9		NKPD1	A0A498NRI4		psmb2	A0A498MZP1		cab39l	A0A498NJV9		myl6	A0A498LTG0		thoc6	A0A498NPP4
SETD9	A0A498LHR9		hint1	A0A498LW95		pura	A0A498LGN8		gmds	A0A498MX26		crkl	A0A498N553		calr3	A0A498MMJ7		NAPSA	A0A498NLQ0		sugt1	A0A498NED4		psmb10	A0A498P5Y7		gsk3b	A0A498MAP7		hars	A0A498NES3		slc2a2	A0A498LBV9		tln1	A0A498LW71		myl3	A0A498M9S8		rab39b	A0A498LGI2
pdzd11	A0A498LHS2		dync1li2	A0A498LWA9		znf592	A0A498LAI4		g3bp1	A0A498NTC7		p4hb	A0A498M105		dbnl	A0A498NAE7		SUCLA2	A0A498NNW1		syt1	A0A498LTH2		ndrg3	A0A498P389		psmc2	A0A498MEA3		aldob	A0A498LLJ4		abce1	A0A498NQD7		tln2	A0A498MVU2		hnrnph1	A0A498ND79		rab3b	A0A498LLB3
appl2	A0A498LHT3		ttc25	A0A498LWD3		dars	A0A498N790		park7	A0A498LYB8		glod4	A0A498L6A7		krt8	A0A498LUC6		rab30	A0A498MYA6		capns1	A0A498LHL4		aire	A0A498LNQ2		eppk1	A0A498NQT4		slc2a2	A0A498LBV9		srsf3	A0A498MV30		cct7	A0A498NUZ4		ppib	A0A498LAB9		aire	A0A498LNQ2
appl1	A0A498LQ34		lasp1	A0A498LWE3		papss1	A0A498LNF8		psmb1	A0A498N6J0		shmt2	A0A498N951		kcnh6	A0A498NMG8		rab27a	A0A498NT07		eif3e	A0A498LFI9		atp2b2	A0A498NJB6		plekhm2	A0A498MXX3		eprs	A0A498LPV0		eftud2	A0A498M6Y5		erlin2	A0A498N7A4		hspa9	A0A498N369		rab3d	A0A498NQ75
ptrhd1	A0A498LHU4		stat3	A0A498LWF7		ank1	A0A498NBP4		snrpb	A0A498NF52		ap3m1	A0A498NZ89		top2b	A0A498LY18		rab4a	A0A498MY60		EIF3L	A0A498N9L1		atp2b4	A0A498LE85		nckap1	A0A498N459		sel1l	A0A498N1D0		rpl34	A0A498LPR4		pygl	A0A498LA35		ergic1	A0A498MW07		tnnc2	A0A498N0H1
pcnx	A0A498LHW1		acly	A0A498LWG6		chd4	A0A498NJC5		ckm	A0A498LPZ0		ap3m2	A0A498NGD5		top2a	A0A498NT58		rab3c	A0A498NR85		ireb2	A0A498LII5		ap2s1	A0A498M0T3		copb1	A0A498MP80		ahsa1	A0A498LWW5		upf1	A0A498NMU3		GLDC	A0A498MTC9		acaa2	A0A498NHY4		ddx4	A0A498LUH2
eml2	A0A498LHW8		gpx3	A0A498LWG8		cat	A0A498N4M9		hsd17b10	A0A498LBK9		uso1	A0A498NFH4		acacb	A0A498NGB1		RAB37	A0A498LTK1		ube2v1	A0A498LTN4		eppk1	A0A498NQT4		btf3	A0A498NED9		abce1	A0A498NQD7		camk2a	A0A498N294		MAP1B	A0A498N3F6		eef1g	A0A498NTK4		rpn1	A0A498NHG3
eml1	A0A498MKI8		CPA3	A0A498LWH2		pip4k2a	A0A498L6U4		eif3b	A0A498L933		appl1	A0A498LQ34		pygb	A0A498P430		rab27b	A0A498N7M2		psmb3	A0A498MYG1		plekhm2	A0A498MXX3		rpl15	A0A498LVN5		dctn1	A0A498LGX9		gnpda2	A0A498NET5		myl1	A0A498NHU8		tarsl2	A0A498MG49		acadm	A0A498LBY9
dcaf17	A0A498LHY4		ppid	A0A498LWH4		aldh3b1	A0A498N2C4		ddx1	A0A498LFM1		cstf3	A0A498NC45		pygl	A0A498LA35		thoc6	A0A498NPP4		gars	A0A498NS73		nckap1	A0A498N459		ldhb	A0A498MKB6		srsf3	A0A498MV30		psmb4	A0A498NBJ4		lancl1	A0A498MFQ8		tars	A0A498NQZ7		gsr	A0A498N4Q6
dll3	A0A498LHZ4		mif	A0A498LWI4		acaa2	A0A498NHY4		vps4b	A0A498N0L6		rpl23a	A0A498NCC9		gcfc2	A0A498MHT5		rab39b	A0A498LGI2		atmin	A0A498LLW6		rpl15	A0A498LVN5		ttc39a	A0A498NRY0		rpl34	A0A498LPR4		ap3d1	A0A498MUR0		myl6	A0A498LTG0		prkca	A0A498MTD2		lcp1	A0A498MAX9
atp5c1	A0A498LI09		RNF157	A0A498LWK4		cdk16	A0A498M7X4		vps4a	A0A498NFE0		ttc39a	A0A498NRY0		rpl12	A0A498LPL3		rab4b	A0A498M0T0		rbbp4	A0A498MLJ2		ldhb	A0A498MKB6		dbnl	A0A498NAE7		upf1	A0A498NMU3		glyr1	A0A498NI11		myl3	A0A498M9S8		pgrmc1	A0A498LQK2		tra2a	A0A498N3P9
tfcp2	A0A498LI31		plch2	A0A498LWN1		fgr	A0A498N3G4		prdx4	A0A498L8V5		calr3	A0A498MMJ7		NKPD1	A0A498NRI4		rab12	A0A498MTM6		cpne3	A0A498N8C4		rpl5	A0A498M2R0		atad2	A0A498MTZ4		camk2a	A0A498N294		prpf4	A0A498MDU5		ppib	A0A498LAB9		rab18	A0A498LVL4		prpf6	A0A498NW67
arhgdia	A0A498LI33		fkbp1a	A0A498LWN3		cdk6	A0A498N709		rtcb	A0A498N2H4		srm	A0A498LY23		hars	A0A498NES3		rab9a	A0A498P559		iars	A0A498NJ41		ttc39a	A0A498NRY0		krt8	A0A498LUC6		dpp9	A0A498LWR2		SNX2	A0A498N6C7		dhcr7	A0A498MK08		psmb10	A0A498P5Y7		frmd6	A0A498LS50
SLC2A13	A0A498LI37		DDAH1	A0A498LWN4		lyn	A0A498LJJ7		aldh18a1	A0A498LMW6		aldh1a2	A0A498L6Y8		ppif	A0A498LM82		rab3b	A0A498LLB3		kif5b	A0A498M763		calr3	A0A498MMJ7		kcnh6	A0A498NMG8		cops2	A0A498N4G1		dld	A0A498LAH2		eef1g	A0A498NTK4		eppk1	A0A498NQT4		nit2	A0A498LLS5
tdrd6	A0A498LI49		sptan1	A0A498LWN5		cdk4	A0A498NJ42		hibadh	A0A498NNB9		lars	A0A498N4V8		aldob	A0A498LLJ4		rab3d	A0A498NQ75		pfdn1	A0A498NYC1		dbnl	A0A498NAE7		add1	A0A498N6U6		gnpda2	A0A498NET5		lmnb1	A0A498LZD2		tars	A0A498NQZ7		nckap1	A0A498N459		ahnak	A0A498NSX2
gopc	A0A498LI52		ndufv1	A0A498LWS5		cdk1	A0A498NU75		api5	A0A498MBP6		dnm1	A0A498N471		gsn	A0A498NKF8		vars	A0A498LBP2		add1	A0A498N6U6		krt8	A0A498LUC6		git1	A0A498LQL3		ap1s1	A0A498MJV6		pak1	A0A498NT33		tarsl2	A0A498MG49		rpl15	A0A498LVN5		tardbp	A0A498LTK5
acsl1	A0A498LDW3		MTFP1	A0A498LWV6		cdk14	A0A498LAD3		cops5	A0A498MZ60		eif3e	A0A498LFI9		EIF3L	A0A498N9L1		tnnc2	A0A498N0H1		add3	A0A498LDW5		kcnh6	A0A498NMG8		pygb	A0A498P430		psmb4	A0A498NBJ4		rsu1	A0A498N579		pgrmc1	A0A498LQK2		ldhb	A0A498MKB6		setd1a	A0A498NPK0
actn2	A0A498LMB7		ahsa1	A0A498LWW5		lck	A0A498NCM9		psma2	A0A498MW39		klc1	A0A498MWF4		slc2a2	A0A498LBV9		ddx4	A0A498LUH2		igf2bp2	A0A498L8U9		cat	A0A498N4M9		gcfc2	A0A498MHT5		tars	A0A498NQZ7		cct8	A0A498LH60		aire	A0A498LNQ2		ttc39a	A0A498NRY0		mvp	A0A498LX76
acsl5	A0A498LRL0		lgi1	A0A498LX10		ube2n	A0A498N6E6		dcaf7	A0A498NN52		DHX35	A0A498MG05		prmt5	A0A498NGI1		rpn1	A0A498NHG3		got1	A0A498LHI8		git1	A0A498LQL3		rpl12	A0A498LPL3		tarsl2	A0A498MG49		rpl18	A0A498NPB6		iqgap2	A0A498NQN9		dbnl	A0A498NAE7		gys1	A0A498LZL8
gnb2l1	A0A498M5K9		slc4a1	A0A498LX14		magoh	A0A498NRF7		snrnp200	A0A498MF00		iqgap2	A0A498NQN9		srsf3	A0A498MV30		acadm	A0A498LBY9		C14orf166	A0A498LP40		pygb	A0A498P430		NKPD1	A0A498NRI4		cars	A0A498LSF8		rpl7	A0A498LJU3		gsk3b	A0A498MAP7		samm50	A0A498LMW5		nefl	A0A498N5J2
actn3	A0A498MHZ7		phb	A0A498LX35		ilf2	A0A498NBZ6		rpl32	A0A498MLZ6		PRDX6	A0A498MG46		eftud2	A0A498M6Y5		dsp	A0A498M167		ak2	A0A498LIT6		pygl	A0A498LA35		hars	A0A498NES3		SNX2	A0A498N6C7		cops4	A0A498MM59		eppk1	A0A498NQT4		krt8	A0A498LUC6		tbl1xr1	A0A498MPR5
ACTN4	A0A498MXB9		mvp	A0A498LX76		chp1	A0A498LVS8		bpnt1	A0A498N514		copa	A0A498LPI1		upf1	A0A498NMU3		tubg1	A0A498MG41		snx6	A0A498MDJ5		gcfc2	A0A498MHT5		aldob	A0A498LLJ4		dld	A0A498LAH2		aars	A0A498MDH5		tecr	A0A498MNH5		kcnh6	A0A498NMG8		sept6	A0A498LGV3
mical3	A0A498MY34		aldh4a1	A0A498LXF0		aph1a	A0A498LY90		dhx15	A0A498MH82		sh3glb2	A0A498LRN4		camk2a	A0A498N294		atp6v1d	A0A498NK38		rpl15	A0A498LVN5		rpl12	A0A498LPL3		gsn	A0A498NKF8		lmnb1	A0A498LZD2		MAP1A	A0A498MEJ1		afg3l2	A0A498MHN6		add1	A0A498N6U6		rps6ka3	A0A498MVB5
eif5b	A0A498N8A7		wdr34	A0A498LXI4		eprs	A0A498LPV0		psme1	A0A498N022		fh	A0A498LTT9		pfkp	A0A498LU01		nit2	A0A498LLS5		mvd	A0A498MM36		cs	A0A498LAX4		hyi	A0A498MHW3		carm1	A0A498N662		gpi	A0A498MUB2		ass1	A0A498MVZ3		pygb	A0A498P430		serpinc1	A0A498MH64
osgepl1	A0A498NHS6		ak1	A0A498LXQ7		krt18	A0A498L7I0		polr2h	A0A498MUI6		RBM12	A0A498MKR7		gnpda2	A0A498NET5		ahnak	A0A498NTE8		arcn1	A0A498N7H4		NKPD1	A0A498NRI4		slc2a2	A0A498LBV9		cct8	A0A498LH60		ruvbl2	A0A498LQK9		rpl15	A0A498LVN5		rpl12	A0A498LPL3		serpinb1	A0A498NC80
RRM1	A0A498LIA0		pfn2	A0A498LY02		ywhaz	A0A498LYK8		kpna4	A0A498M1B8		atmin	A0A498LLW6		ap1s1	A0A498MJV6		tardbp	A0A498LTK5		gmfb	A0A498LA25		hars	A0A498NES3		gnpda2	A0A498NET5		rpl7	A0A498LJU3		kpna4	A0A498M1B8		ldhb	A0A498MKB6		NKPD1	A0A498NRI4		echs1	A0A498MUH8
c1qtnf5	A0A498LIC0		srm	A0A498LY23		ywhah	A0A498MXB4		rpl18a	A0A498LIH2		kcnh4	A0A498LZM8		psmb4	A0A498NBJ4		setd1a	A0A498NPK0		picalm	A0A498LLQ2		aqr	A0A498NAG9		srsf3	A0A498MV30		psmd14	A0A498LT27		dhx9	A0A498MI27		rpl5	A0A498M2R0		cs	A0A498LAX4		aldh6a1	A0A498M1U7
ECM1	A0A498LID7		hyou1	A0A498LY34		smarca2	A0A498NQS2		acadvl	A0A498MKU0		rab5a	A0A498MZU2		dld	A0A498LAH2		vapa	A0A498MCT5		snap91	A0A498NIL3		aldob	A0A498LLJ4		rpl34	A0A498LPR4		aars	A0A498MDH5		rps16	A0A498LS35		ttc39a	A0A498NRY0		ppif	A0A498LM82		aldh7a1	A0A498M088
myo18a	A0A498LY50		u2af1	A0A498LY45		smarca4	A0A498MI78		iqgap1	A0A498MM11		cpne3	A0A498N8C4		lmnb1	A0A498LZD2		rps19	A0A498LRA6		bub3	A0A498LL89		slc2a2	A0A498LBV9		upf1	A0A498NMU3		MAP1A	A0A498MEJ1		prdx1	A0A498M0B1		calr3	A0A498MMJ7		aldob	A0A498LLJ4		acadl	A0A498N4S4
TPPP2	A0A498LIE2		aph1a	A0A498LY90		add2	A0A498NGA5		drg1	A0A498NSN9		kif5b	A0A498M763		carm1	A0A498N662		mvp	A0A498LX76		rpl35	A0A498MJY6		srsf3	A0A498MV30		camk2a	A0A498N294		gpi	A0A498MUB2		dmtn	A0A498MFB6		dbnl	A0A498NAE7		gsn	A0A498NKF8		sar1b	A0A498LDZ5
DPEP3	A0A498MN92		txlna	A0A498LYA1		atp6v1h	A0A498MJS7		p4hb	A0A498M105		ndrg3	A0A498P389		rpl18	A0A498NPB6		nefl	A0A498N5J2		sf3b1	A0A498NAS7		rpl34	A0A498LPR4		ap1s1	A0A498MJV6		ruvbl2	A0A498LQK9		hnrnpk	A0A498NGQ1		krt8	A0A498LUC6		psmb2	A0A498MZP1		ppa1	A0A498LL47
hadha	A0A498LIF2		atp2a3	A0A498LYA4		TMEM200B	A0A498NPL1		glod4	A0A498L6A7		add3	A0A498LDW5		cluh	A0A498LHF1		hnrnpll	A0A498MRG3		rars	A0A498LTZ7		upf1	A0A498NMU3		psmb4	A0A498NBJ4		tubg1	A0A498MG41		rps6ka3	A0A498MVB5		kcnh6	A0A498NMG8		slc2a2	A0A498LBV9		HNRNPH3	A0A498NDF4
slc30a1	A0A498N3J5		ampd1	A0A498LYA9		atp6v0d1	A0A498MIE0		shmt2	A0A498N951		add1	A0A498N6U6		rpl7	A0A498LJU3		snap25	A0A498LLP4		fh	A0A498LTT9		camk2a	A0A498N294		glyr1	A0A498NI11		prkcb	A0A498NMH1		camk2d	A0A498NIW6		grpel1	A0A498MDZ5		sf3b1	A0A498NAS7		crmp1	A0A498MGP7
plxnb2	A0A498LIG6		park7	A0A498LYB8		rab15	A0A498M7U6		ppp2r2d	A0A498LGJ5		igf2bp2	A0A498N8N6		xpo1	A0A498NBE6		aldob	A0A498LLJ4		ap1m2	A0A498NL71		dpp9	A0A498LWR2		cars	A0A498LSF8		kpna4	A0A498M1B8		usp7	A0A498NBJ7		acacb	A0A498NGB1		prmt5	A0A498NGI1		dpys	A0A498L4W1
plxna3	A0A498LT48		map1lc3b	A0A498LYC4		gnat2	A0A498NBP1		osbp2	A0A498NJD9		rpl13a	A0A498NBD8		ruvbl2	A0A498LQK9		serpinc1	A0A498MH64		copg2	A0A498M9V6		rpl22	A0A498MSK2		SNX2	A0A498N6C7		rpl26l1	A0A498ND70		naa15	A0A498N8D7		pygb	A0A498P430		camk2a	A0A498N294		slc38a7	A0A498MQJ7
plxna4	A0A498M9K4		sfxn1	A0A498LYC7		GNAL	A0A498L2H9		osbp	A0A498LL08		zmpste24	A0A498NCP1		ilf3	A0A498NVH4		serpinb1	A0A498NC80		alkbh4	A0A498MMB3		gnpda2	A0A498NET5		lmnb1	A0A498LZD2		dhx9	A0A498MI27		snx29	A0A498L965		gcfc2	A0A498MHT5		dpp9	A0A498LWR2		arcn1	A0A498N7H4
PLXNA2	A0A498ML38		eci2	A0A498LYJ3		gnat1	A0A498LDI3		smarca4	A0A498MI78		ubqln4	A0A498NQC9		ube2m	A0A498MC44		atp2b4	A0A498LE85		dnm1l	A0A498P3I9		ap1s1	A0A498MJV6		rsu1	A0A498N579		hspb1	A0A498NLH3		ddi2	A0A498L5Z7		rpl12	A0A498LPL3		aqr	A0A498NAG9		snap25	A0A498LLP4
plxnb1	A0A498MZI6		ywhaz	A0A498LYK8		myo6	A0A498MBZ1		mcm6	A0A498NNW8		got1	A0A498LHI8		prdx1	A0A498M0B1		atp2b2	A0A498NJB6		snx29	A0A498L965		psmb4	A0A498NBJ4		carm1	A0A498N662		HSPA4L	A0A498LWX6		nup93	A0A498MB05		NKPD1	A0A498NRI4		polr2a	A0A498LS48		calb2	A0A498MBC2
plxna1	A0A498NKS1		dctn4	A0A498LYU8		c1qbp	A0A498NKL6		shmt1	A0A498L5W2		ptpra	A0A498NKD0		smc1a	A0A498LVV3		echs1	A0A498MUH8		sept6	A0A498LGV3		AP3S1	A0A498NA52		cct8	A0A498LH60		camk2d	A0A498NIW6		PEA15	A0A498NPD4		hars	A0A498NES3		cops2	A0A498N4G1		OGDHL	A0A498MQY5
rpl18a	A0A498LIH2		trip11	A0A498LYY9		atp5c1	A0A498LI09		picalm	A0A498LLQ2		snx6	A0A498MDJ5		rps6ka3	A0A498MVB5		prdx2	A0A498LM50		gnpda2	A0A498NET5		glyr1	A0A498NI11		rpl7	A0A498LJU3		usp7	A0A498NBJ7		FAM49B	A0A498N1Q0		ppif	A0A498LM82		gnpda2	A0A498NET5		mvd	A0A498MM36
nt5c3a	A0A498LIJ6		qars	A0A498LZ02		cab39l	A0A498NJV9		ranbp3	A0A498N0B4		mars	A0A498NF02		camk2d	A0A498NIW6		abat	A0A498NBJ5		PFKL	A0A498M7R6		prpf4	A0A498MDU5		cops4	A0A498MM59		naa15	A0A498N8D7		prmt5	A0A498NGI1		aldob	A0A498LLJ4		psmb4	A0A498NBJ4		elavl2	A0A498NML0
c1galt1c1	A0A498LIK7		lmnb1	A0A498LZD2		kif5b	A0A498M763		sept2	A0A498MAB6		mvd	A0A498MM36		naa15	A0A498N8D7		aldh6a1	A0A498M1U7		uap1	A0A498NU86		cars	A0A498LSF8		psmc4	A0A498NK57		ddi2	A0A498L5Z7		chmp4b	A0A498N7K0		gsn	A0A498NKF8		prpf4	A0A498MDU5		adsl	A0A498MZR2
SLC16A7	A0A498LIK9		C5orf63	A0A498LZE1		tln1	A0A498LW71		nit2	A0A498LLS5		arcn1	A0A498N7H4		nup93	A0A498MB05		aldh7a1	A0A498M088		grpel1	A0A498MDZ5		dld	A0A498LAH2		MAP1A	A0A498MEJ1		rsu1	A0A498N579		kcmf1	A0A498ME58		hyi	A0A498MHW3		usp48	A0A498NRF0		ubqln4	A0A498NQC9
XAF1	A0A498LIM4		capn11	A0A498LZE6		tln2	A0A498MVU2		pak2	A0A498MHP4		snd1	A0A498MKL8		igf2bp3	A0A498NAX1		acadl	A0A498N4S4		ctnna2	A0A498MTB9		lmnb1	A0A498LZD2		ruvbl2	A0A498LQK9		eef1g	A0A498NTK4		nsfl1c	A0A498LA40		EIF3L	A0A498N9L1		cars	A0A498LSF8		napb	A0A498MS39
ehd3	A0A498LKP9		rbbp9	A0A498LZI5		UBE2O	A0A498M5K6		ttc39a	A0A498NRY0		mta2	A0A498LCW4		map2k2	A0A498NGW6		sar1b	A0A498LDZ5		smc1a	A0A498LVV3		rsu1	A0A498N579		kpna4	A0A498M1B8		igf2bp3	A0A498NAX1		rfc2	A0A498MYK7		slc2a2	A0A498LBV9		SNX2	A0A498N6C7		fabp3	A0A498MWH4
akap10	A0A498MS40		gys1	A0A498LZL8		cct7	A0A498NUZ4		calr3	A0A498MMJ7		EIF3L	A0A498N9L1		srp54	A0A498MQC4		ppa1	A0A498LL47		igf2bp1	A0A498MU51		carm1	A0A498N662		snrnp200	A0A498MF00		prmt5	A0A498NGI1		paics	A0A498MUQ6		prmt5	A0A498NGI1		dld	A0A498LAH2		pmp2	A0A498MRU3
CC2D1A	A0A498NAN4		kcnh4	A0A498LZM8		erlin2	A0A498N7A4		srm	A0A498LY23		rpl4	A0A498MG21		chmp4b	A0A498N7K0		ivd	A0A498MHV3		sept2	A0A498MAB6		rpl7	A0A498LJU3		hspb1	A0A498NLH3		kcmf1	A0A498ME58		gars	A0A498NS73		ahsa1	A0A498LWW5		lmnb1	A0A498LZD2		aldh1a2	A0A498L6Y8
spcs1	A0A498LIS4		glrx	A0A498LZX5		prkcb	A0A498NMH1		rpl35	A0A498MJY6		rpl31	A0A498MC52		nsfl1c	A0A498LA40		HPCAL1	A0A498LDM3		drg2	A0A498M5H6		cops4	A0A498MM59		rps6ka3	A0A498MVB5		nsfl1c	A0A498LA40		eif4h	A0A498M1G8		srsf3	A0A498MV30		rsu1	A0A498N579		aldh9a1	A0A498LEV5
podn	A0A498LIT3		pgk1	A0A498LZY5		GLDC	A0A498MTC9		cspg5	A0A498NKU3		cops2	A0A498N4G1		vps4a	A0A498NFE0		aco1	A0A498MTB1		impdh2	A0A498NDI4		cct7	A0A498NUZ4		ube2m	A0A498MC44		wdr34	A0A498LXI4		acat1	A0A498MP51		upf1	A0A498NMU3		carm1	A0A498N662		aldh1a3	A0A498MHF6
negr1	A0A498LIT5		isoc1	A0A498M060		MAP1B	A0A498N3F6		psmd12	A0A498MYH7		rars	A0A498LTZ7		rps16	A0A498LS35		got1	A0A498LHI8		uap1l1	A0A498LPN6		papss1	A0A498LNF8		prdx1	A0A498M0B1		rfc2	A0A498MYK7		best2	A0A498LUM0		camk2a	A0A498N294		cct8	A0A498LH60		aldh3b1	A0A498N2C4
ak2	A0A498LIT6		rusc1	A0A498M085		myl4	A0A498MJ94		lars	A0A498N4V8		ap1m2	A0A498NL71		paics	A0A498MUQ6		crmp1	A0A498MGP7		set	A0A498NHZ1		aars	A0A498MDH5		HSPA4L	A0A498LWX6		ruvbl1	A0A498L6Q9		ipo7	A0A498MKX6		dpp9	A0A498LWR2		rpl18	A0A498NPB6		me3	A0A498NAP3
cmpk1	A0A498N071		aldh7a1	A0A498M088		myl1	A0A498NHU8		btf3l4	A0A498NJ63		sept2	A0A498MAB6		nudc	A0A498NQC1		dpys	A0A498L4W1		srsf2	A0A498LSM2		gpi	A0A498MUB2		camk2d	A0A498NIW6		rps16	A0A498LS35		fubp3	A0A498MUZ4		pfkp	A0A498LU01		rpl7	A0A498LJU3		eif3a	A0A498L5W0
rp2	A0A498LIU3		prdx1	A0A498M0B1		lancl1	A0A498MFQ8		SPIDR	A0A498MSK4		prdx4	A0A498L8V5		chd4	A0A498NJC5		snx12	A0A498LH99		gmpr2	A0A498MKE8		ruvbl2	A0A498LQK9		nup93	A0A498MB05		paics	A0A498MUQ6		ctsd	A0A498LV43		ap1s1	A0A498MJV6		gpi	A0A498MUB2		arl3	A0A498MW00
NEMF	A0A498LIU8		lmcd1	A0A498M0D2		myl6	A0A498LTG0		vps35	A0A498MDH6		prdx2	A0A498LM50		acat1	A0A498MP51		calb2	A0A498MBC2		hadha	A0A498LIF2		tubg1	A0A498MG41		PEA15	A0A498NPD4		gars	A0A498NS73		rab5a	A0A498MZU2		psmb4	A0A498NBJ4		tubg1	A0A498MG41		adh5	A0A498MXR4
pbxip1	A0A498LIX9		ppp2ca	A0A498M0I0		myl3	A0A498M9S8		ube2m	A0A498MC44		iars2	A0A498N5U1		CSNK2A1	A0A498LV59		vat1l	A0A498ME27		snrpb	A0A498NF52		prkcb	A0A498NMH1		ppa1	A0A498LL47		acat1	A0A498MP51		kcnh4	A0A498LZM8		SNX2	A0A498N6C7		EFTUD1	A0A498NA71		chmp4b	A0A498N7K0
GUCY1A2	A0A498MRL9		psph	A0A498M0I8		ppib	A0A498LAB9		hsf4	A0A498MEH9		psmd12	A0A498MYH7		best2	A0A498LUM0		rufy3	A0A498MAE6		ptbp3	A0A498MJ90		kpna4	A0A498M1B8		pdia3	A0A498MDR7		stat3	A0A498LWF7		sf3b3	A0A498MBG5		dld	A0A498LAH2		kpna4	A0A498M1B8		snx3	A0A498LKX7
lad1	A0A498LJ20		pofut1	A0A498M0R9		dhcr7	A0A498MK08		capns1	A0A498LHL4		ctnna2	A0A498MTB9		ipo7	A0A498MKX6		napb	A0A498MS39		ptbp1	A0A498LJP8		hspb1	A0A498NLH3		FAM49B	A0A498N1Q0		ipo7	A0A498MKX6		golga3	A0A498NG76		lmnb1	A0A498LZD2		ube2m	A0A498MC44		rab18	A0A498LVL4
MRE11A	A0A498LJ32		rab4b	A0A498M0T0		RAP1GDS1	A0A498NIT8		eif3e	A0A498LFI9		rpl7	A0A498LJU3		abcf2	A0A498M8N9		arl3	A0A498MW00		u2af1	A0A498LY45		smarca5	A0A498LMB5		prmt5	A0A498NGI1		fubp3	A0A498MUZ4		pdia3	A0A498MDR7		rsu1	A0A498N579		rps6ka3	A0A498MVB5		RAB21	A0A498N7R7
SH3BGRL	A0A498LJ34		ap2s1	A0A498M0T3		hgs	A0A498L6D4		iqgap2	A0A498NQN9		smc1a	A0A498LVV3		gpi	A0A498MUB2		fabp3	A0A498MWH4		ppp2r4	A0A498LRM8		rps6ka3	A0A498MVB5		chmp4b	A0A498N7K0		ctsd	A0A498LV43		CSNK2A1	A0A498LV59		cct8	A0A498LH60		camk2d	A0A498NIW6		txlna	A0A498LYA1
trappc6b	A0A498ML61		trappc4	A0A498M0T9		fam91a1	A0A498N319		ube2v1	A0A498LTN4		drg2	A0A498M5H6		fubp3	A0A498MUZ4		pmp2	A0A498MRU3		isoc1	A0A498M060		ube2m	A0A498MC44		tbc1d1	A0A498L925		kcnh4	A0A498LZM8		rpl23a	A0A498NCC9		rpl18	A0A498NPB6		naa15	A0A498N8D7		aamdc	A0A498NTK6
nrd1	A0A498LJ54		asns	A0A498M0X4		tarsl2	A0A498MG49		cab39l	A0A498NJV9		impdh2	A0A498NDI4		ctsd	A0A498LV43		actr3b	A0A498NRS4		ehd3	A0A498LKP9		prdx1	A0A498M0B1		pgm2	A0A498N046		rab5a	A0A498MZU2		isoc1	A0A498M060		cluh	A0A498LHF1		nup93	A0A498MB05		fabp7	A0A498LTJ0
tdrd3	A0A498LJ59		p4hb	A0A498M105		tars	A0A498NQZ7		fh	A0A498LTT9		gmpr2	A0A498MKE8		kcnh4	A0A498LZM8		cadps	A0A498LRQ3		npepps	A0A498L5J2		hnrnpk	A0A498NGQ1		rps16	A0A498LS35		sf3b3	A0A498MBG5		strap	A0A498M9M9		rpl7	A0A498LJU3		PEA15	A0A498NPD4		rpl28	A0A498NGN3
ndufb3	A0A498LJ72		ca5a	A0A498M135		scin	A0A498MSB3		psmb3	A0A498MYG1		hadha	A0A498LIF2		rab5a	A0A498MZU2		kiaa0513	A0A498MEQ5		inpp5d	A0A498L8Q0		camk2d	A0A498NIW6		paics	A0A498MUQ6		golga3	A0A498NG76		pdcd6ip	A0A498NAQ7		papss1	A0A498LNF8		ppa1	A0A498LL47		vamp1	A0A498LKF6
APOL4	A0A498LJA9		gabrd	A0A498M145		prkca	A0A498MTD2		gars	A0A498NS73		rpl11	A0A498N3H4		polr2b	A0A498NA51		ncald	A0A498LGU7		NAPSA	A0A498NLQ0		usp7	A0A498NBJ7		eif4h	A0A498M1G8		pdia3	A0A498MDR7		g3bp1	A0A498NTC7		xpo1	A0A498NBE6		hars	A0A498NES3		rpl21	A0A498NSE5
hat1	A0A498LJB0		dsp	A0A498M167		pgrmc1	A0A498LQK2		atmin	A0A498LLW6		cul3	A0A498NAG6		fam171a1	A0A498NCE6		dazap1	A0A498NJ14		SUCLA2	A0A498NNW1		naa15	A0A498N8D7		acat1	A0A498MP51		CSNK2A1	A0A498LV59		park7	A0A498LYB8		ruvbl2	A0A498LQK9		igf2bp3	A0A498NAX1		map1lc3a	A0A498MSG3
ENO2	A0A498LA61		MVB12A	A0A498M174		tbl1xr1	A0A498MPR5		inpp5d	A0A498L8Q0		psmb6	A0A498LJQ3		golga3	A0A498NG76		isoc1	A0A498M060		cfl2	A0A498MQK3		ddi2	A0A498L5Z7		best2	A0A498LUM0		rpl23a	A0A498NCC9		drg2	A0A498M5H6		kpna4	A0A498M1B8		srp54	A0A498MQC4		bpgm	A0A498M3Y5
eno3	A0A498LJB6		atp2a1	A0A498M1A1		psmb10	A0A498P5Y7		ipo5	A0A498NA00		ptbp3	A0A498MJ90		pdia3	A0A498MDR7		acp1	A0A498LQP8		RAB37	A0A498LTK1		nup93	A0A498MB05		eif3g	A0A498L7T5		ufd1l	A0A498LLT9		rpl5	A0A498M2R0		rps16	A0A498LS35		chmp4b	A0A498N7K0		cdk5rap3	A0A498LSG3
eno1	A0A498LMQ3		zc2hc1a	A0A498M1B4		ndrg3	A0A498P389		kcnh4	A0A498LZM8		ptbp1	A0A498LJP8		rpl23a	A0A498NCC9		des	A0A498NNZ4		rab27b	A0A498N7M2		ppa1	A0A498LL47		ipo7	A0A498MKX6		etf1	A0A498N525		psmb1	A0A498N6J0		prdx1	A0A498M0B1		nsfl1c	A0A498LA40		glo1	A0A498LP57
RMDN1	A0A498MCU4		kpna4	A0A498M1B8		aire	A0A498LNQ2		rab5a	A0A498MZU2		gsk3b	A0A498MAP7		ufd1l	A0A498LLT9		nefm	A0A498NC53		rab30	A0A498MYA6		igf2bp3	A0A498NAX1		gpi	A0A498MUB2		uap1	A0A498NU86		dpp3	A0A498N600		camk2d	A0A498NIW6		tbc1d1	A0A498L925		ak3	A0A498MXG2
urod	A0A498LJC4		sdha	A0A498M1C7		vps45	A0A498NAP9		cpne3	A0A498N8C4		arih2	A0A498LST9		strap	A0A498M9M9		ina	A0A498LBX2		rab27a	A0A498NT07		map2k2	A0A498NGW6		ctsd	A0A498LV43		ranbp3	A0A498N0B4		smc1a	A0A498LVV3		rps6ka3	A0A498MVB5		pgm2	A0A498N046		ak1	A0A498LXQ7
nfxl1	A0A498LJE3		limd1	A0A498M1F2		gsk3b	A0A498MAP7		iars	A0A498NJ41		fscn2	A0A498MVZ0		g3bp1	A0A498NTC7		snx3	A0A498LKX7		rab4a	A0A498MY60		srp54	A0A498MQC4		rab5a	A0A498MZU2		g3bp1	A0A498NTC7		ppp2r2d	A0A498LGJ5		usp7	A0A498NBJ7		rfc2	A0A498MYK7		parp1	A0A498LGP1
cnga1	A0A498LJH2		nudt2	A0A498M1G4		clasp2	A0A498N3F4		kif5b	A0A498M763		pc	A0A498NTR3		park7	A0A498LYB8		cct6a	A0A498N9P4		rab3c	A0A498NR85		prmt5	A0A498NGI1		kcnh4	A0A498LZM8		park7	A0A498LYB8		lasp1	A0A498LWE3		naa15	A0A498N8D7		hypk	A0A498P2M3		bckdha	A0A498LC60
ALOXE3	A0A498LJN6		eif4h	A0A498M1G8		rraga	A0A498MZL1		g6pd	A0A498NGC9		SUCLA2	A0A498NNW1		drg2	A0A498M5H6		kif5b	A0A498M763		rab3b	A0A498LLB3		bcas2	A0A498P2D9		EIF4G3	A0A498LQD7		drg2	A0A498M5H6		ckm	A0A498LPZ0		ddi2	A0A498L5Z7		rps16	A0A498LS35		ssr3	A0A498MN87
pfn1	A0A498LJP3		aadac	A0A498M1J0		ap2s1	A0A498M0T3		ppa1	A0A498LL47		cfl2	A0A498MQK3		psmb1	A0A498N6J0		rpl21	A0A498NSE5		rab3d	A0A498NQ75		chmp4b	A0A498N7K0		CSNK2A1	A0A498LV59		rpl5	A0A498M2R0		hsd17b10	A0A498LBK9		ppa1	A0A498LL47		paics	A0A498MUQ6		rpl15	A0A498LVN5
klhl15	A0A498LJN2		prph	A0A498M1K6		eppk1	A0A498NQT4		add1	A0A498N6U6		RAB37	A0A498LTK1		nrd1	A0A498LJ54		map1lc3a	A0A498MSG3		thoc6	A0A498NPP4		nsfl1c	A0A498LA40		rpl23a	A0A498NCC9		vac14	A0A498MWP3		vps4b	A0A498N0L6		ide	A0A498LTM7		eif4h	A0A498M1G8		gars	A0A498NS73
cmbl	A0A498LJP4		nars	A0A498M1S6		tecr	A0A498MNH5		add3	A0A498LDW5		rab27b	A0A498N7M2		gars	A0A498NS73		crabp1	A0A498LAL7		rab39b	A0A498LGI2		vps4a	A0A498NFE0		ufd1l	A0A498LLT9		psmb1	A0A498N6J0		vps4a	A0A498NFE0		srp54	A0A498MQC4		CSNK2A1	A0A498LV59		myo1c	A0A498LHJ3
ptbp1	A0A498LJP8		aldh6a1	A0A498M1U7		ppfia2	A0A498LVU0		igf2bp2	A0A498L8U9		rab4a	A0A498MY60		ppp2r2d	A0A498LGJ5		cul3	A0A498NAG6		rab4b	A0A498M0T0		rps16	A0A498LS35		etf1	A0A498N525		dpp3	A0A498N600		KATNAL1	A0A498M7J9		chmp4b	A0A498N7K0		edc4	A0A498MLW3		hibadha	A0A498MZS1
ptbp3	A0A498MJ90		pfdn4	A0A498M237		ppfia3	A0A498L2E3		zmpste24	A0A498NCP1		rab3c	A0A498NR85		lasp1	A0A498LWE3		rpl28	A0A498NGN3		rab12	A0A498MTM6		paics	A0A498MUQ6		uap1	A0A498NU86		ppp2r2d	A0A498LGJ5		prdx4	A0A498L8V5		nsfl1c	A0A498LA40		cul1	A0A498LED4		shmt2	A0A498N951
ptbp2	A0A498N0X0		psmb9	A0A498M262		ppfia4	A0A498LE25		psme3	A0A498LWL0		rab30	A0A498MYA6		ckm	A0A498LPZ0		rab18	A0A498NTT7		rab9a	A0A498P559		gars	A0A498NS73		cul1	A0A498LED4		hnrnpdl	A0A498LUJ4		rtcb	A0A498N2H4		tbc1d1	A0A498L925		best2	A0A498LUM0		KATNAL1	A0A498M7J9
psmb6	A0A498LJQ3		col12a1	A0A498M2L1		plekhm2	A0A498MXX3		got1	A0A498LHI8		rab27a	A0A498NT07		hsd17b10	A0A498LBK9		bckdha	A0A498LC60		ddx4	A0A498LUH2		acat1	A0A498MP51		g3bp1	A0A498NTC7		lasp1	A0A498LWE3		hibadh	A0A498NNB9		pgm2	A0A498N046		ipo7	A0A498MKX6		trip11	A0A498LYY9
cltc	A0A498LJQ6		rpl5	A0A498M2R0		nckap1	A0A498N459		C14orf166	A0A498LP40		rab3b	A0A498LLB3		vps4b	A0A498N0L6		ssr3	A0A498MN87		rpn1	A0A498NHG3		stat3	A0A498LWF7		park7	A0A498LYB8		ckm	A0A498LPZ0		rbms2	A0A498NJG1		paics	A0A498MUQ6		kif5c	A0A498NB35		kpna3	A0A498NKE3
CLTCL1	A0A498NHX3		tapbp	A0A498M2R2		rpl15	A0A498LVN5		ak2	A0A498LIT6		aire	A0A498LNQ2		AP3B1	A0A498M1W5		C18orf32	A0A498N8N2		acadm	A0A498LBY9		eif3g	A0A498L7T5		rpl5	A0A498M2R0		hsd17b10	A0A498LBK9		crk	A0A498LHE2		gars	A0A498NS73		abcf2	A0A498M8N9		ppm1a	A0A498MCG3
cast	A0A498LJR2		LRG1	A0A498M2U1		ldhb	A0A498MKB6		ptpra	A0A498NKD0		rab3d	A0A498NQ75		prdx4	A0A498L8V5		rpl35	A0A498MJY6		csnk2a2	A0A498MCY8		ipo7	A0A498MKX6		psmb1	A0A498N6J0		ddx1	A0A498LFM1		rpl32	A0A498MLZ6		nudc	A0A498NQC1		fubp3	A0A498MUZ4		slc3a1	A0A498N651
ARMCX3	A0A498LJR5		cfap74	A0A498M340		rpl5	A0A498M2R0		hyou1	A0A498LY34		thoc6	A0A498NPP4		hibadh	A0A498NNB9		abce1	A0A498NQD7		dsp	A0A498M167		abcf2	A0A498M8N9		gars	A0A498NS73		vps4b	A0A498N0L6		bpnt1	A0A498N514		acat1	A0A498MP51		ctsd	A0A498LV43		pin4	A0A498NU90
fbxl5	A0A498LJR7		ran	A0A498M343		exoc5	A0A498M1V8		snx6	A0A498MDJ5		rab39b	A0A498LGI2		snrpf	A0A498MPZ9		arf6	A0A498NTC1		mapk14	A0A498NV34		ctsd	A0A498LV43		lasp1	A0A498LWE3		vps4a	A0A498NFE0		rnf2	A0A498MDT8		stat3	A0A498LWF7		polr2b	A0A498NA51		st13	A0A498NMR0
pcsk1	A0A498LJS5		gmppb	A0A498M3E5		ttc39a	A0A498NRY0		ide	A0A498LTM7		rab9a	A0A498NNX0		psma2	A0A498MW39		vapb	A0A498LN48		nampt	A0A498NA34		kcnh4	A0A498LZM8		ckm	A0A498LPZ0		prdx4	A0A498L8V5		fermt3	A0A498N227		best2	A0A498LUM0		pfas	A0A498MXI8		acsl5	A0A498LRL0
lman1	A0A498LJT3		reep5	A0A498M3F5		calr3	A0A498MMJ7		papss2	A0A498NFB2		rab4b	A0A498M0T0		C14orf166	A0A498LP40		gosr2	A0A498LAH1		papss1	A0A498LNF8		rab5a	A0A498MZU2		hsd17b10	A0A498LBK9		rtcb	A0A498N2H4		dhx15	A0A498MH82		ipo7	A0A498MKX6		sf3b3	A0A498MBG5		acsl1	A0A498LDW3
bbs1	A0A498LJT7		clec3b	A0A498M3J2		dbnl	A0A498NAE7		mvd	A0A498MM36		rab12	A0A498MTM6		crk	A0A498LHE2		rras	A0A498NPH6		papss2	A0A498NFB2		pfas	A0A498MXI8		vps4a	A0A498NFE0		aldh18a1	A0A498LMW6		prkcq	A0A498LHZ9		abcf2	A0A498M8N9		golga3	A0A498NG76		gys2	A0A498MD49
rpl7	A0A498LJU3		mrpl24	A0A498M3K3		atad2	A0A498MTZ4		gmfb	A0A498LA25		rpn1	A0A498NHG3		pold1	A0A498LX53		tub	A0A498MYE8		urod	A0A498LJC4		ubqln4	A0A498NQC9		vps4b	A0A498N0L6		hibadh	A0A498NNB9		prkce	A0A498N798		gpi	A0A498MUB2		pdia3	A0A498MDR7		ephx2	A0A498NP55
NAGPA	A0A498LJW8		bpgm	A0A498M3Y5		ptprs	A0A498MN73		snap91	A0A498NIL3		acadm	A0A498LBY9		polr2h	A0A498MUI6		nras	A0A498LVZ1		psmb6	A0A498LJQ3		sf3b3	A0A498MBG5		prdx4	A0A498L8V5		api5	A0A498MBP6		prkca	A0A498MTD2		fubp3	A0A498MUZ4		ufd1l	A0A498LLT9		ivd	A0A498MHV3
xrcc6bp1	A0A498LJY8		dnm2	A0A498M3Y7		PTPRD	A0A498MQA6		snd1	A0A498MKL8		csnk2a2	A0A498MCY8		kpna4	A0A498M1B8		tln2	A0A498MVU2		frmd6	A0A498LS50		golga3	A0A498NG76		hibadh	A0A498NNB9		snrpf	A0A498MPZ9		prkcb	A0A498NMH1		ctsd	A0A498LV43		gapvd1	A0A498MEX2		dhtkd1	A0A498MTD0
atp1b4	A0A498LK03		YBX2	A0A498M3Z6		ptprf	A0A498N226		EIF3L	A0A498N9L1		gsr	A0A498N4Q6		rpl18a	A0A498LIH2		taok2	A0A498MM58		ahnak	A0A498NTE8		pdia3	A0A498MDR7		api5	A0A498MBP6		snrnp70	A0A498NMP8		rprd1b	A0A498NRW2		fam171a1	A0A498NCE6		strap	A0A498M9M9		pcca	A0A498L3R2
cct5	A0A498LK15		qdpr	A0A498M4G6		krt8	A0A498LUC6		rpl31	A0A498MC52		dsp	A0A498M167		iqgap1	A0A498MM11		kras	A0A498MKW9		tardbp	A0A498LTK5		CSNK2A1	A0A498LV59		eif3b	A0A498L933		cops5	A0A498MZ60		DDB1	A0A498LQ23		sf3b3	A0A498MBG5		uap1	A0A498NU86		aldh4a1	A0A498LXF0
fam129a	A0A498MC09		lxn	A0A498M4K7		kcnh6	A0A498NMG8		cops2	A0A498N4G1		DDB1	A0A498LQ23		crkl	A0A498N553		pds5a	A0A498N1E0		setd1a	A0A498NPK0		rpl23a	A0A498NCC9		snrnp70	A0A498NMP8		psma2	A0A498MW39		psme2	A0A498NMM5		golga3	A0A498NG76		ranbp3	A0A498N0B4		pccb	A0A498P434
sybu	A0A498LK22		HNRNPR	A0A498M4Z7		ITIH4	A0A498NX86		fkbp14	A0A498NNT2		kpna3	A0A498NKE3		p4hb	A0A498M105		kpna1	A0A498NRI9		uba5	A0A498NDZ0		ufd1l	A0A498LLT9		cops5	A0A498MZ60		crk	A0A498LHE2		psme1	A0A498N022		pdia3	A0A498MDR7		prpf40a	A0A498LFV9		hadhb	A0A498NK83
fhdc1	A0A498LK37		camlg	A0A498M509		itih3	A0A498MUL6		top2b	A0A498LY18		ephb2	A0A498N6Z2		glod4	A0A498L6A7		psmd1	A0A498MYM2		mvp	A0A498LX76		SNX2	A0A498N2N3		psma2	A0A498MW39		fam32a	A0A498MUZ0		polr2h	A0A498MUI6		GBF1	A0A498N847		g3bp1	A0A498NTC7		rtn1	A0A498M5S4
nptn	A0A498LK64		anxa4	A0A498M537		add1	A0A498N6U6		elavl3	A0A498MPM9		epha4	A0A498L7Y2		shmt1	A0A498L5W2		best2	A0A498LUM0		ptpra	A0A498NKD0		strap	A0A498M9M9		crk	A0A498LHE2		dcaf7	A0A498NN52		rpl18a	A0A498LIH2		CSNK2A1	A0A498LV59		park7	A0A498LYB8		rtn3	A0A498LGC7
pla2g1b	A0A498LK73		adprh	A0A498M566		acacb	A0A498NGB1		elavl4	A0A498NS54		ephb3	A0A498L7L7		shmt2	A0A498N951		krt18	A0A498L7I0		sdha	A0A498M1C7		uap1	A0A498NU86		bpnt1	A0A498N514		cul1	A0A498LED4		acadvl	A0A498MKU0		rpl23a	A0A498NCC9		rpl5	A0A498M2R0		naa50	A0A498NT28
ggt5	A0A498LK83		drg2	A0A498M5H6		pygb	A0A498P430		elavl2	A0A498NML0		sept10	A0A498MAY9		LMTK3	A0A498NJ80		ugdh	A0A498N1B2		ak3	A0A498MXG2		acaca	A0A498M9R9		fermt3	A0A498N227		bpnt1	A0A498N514		g6pd	A0A498NGC9		ufd1l	A0A498LLT9		vac14	A0A498MWP3		rps10	A0A498LD02
psmb7	A0A498LKB6		gnb2l1	A0A498M5K9		pygl	A0A498LA35		dnm1l	A0A498P3I9		ahnak	A0A498NTE8		mrps35	A0A498L2R3		ctnnd1	A0A498MKM0		amylase	A0A498N5K0		acacb	A0A498NGB1		dhx15	A0A498MH82		rnf2	A0A498MDT8		drg1	A0A498NSN9		isoc1	A0A498M060		psmb1	A0A498N6J0		ndufa7	A0A498LW32
psmb10	A0A498P5Y7		slc25a11	A0A498M5Q7		camk2d	A0A498NIW6		prdx2	A0A498LM50		tardbp	A0A498LTK5		mcm6	A0A498NNW8		ephx2	A0A498NP55		trappc3	A0A498MH32		g3bp1	A0A498NTC7		prkce	A0A498LSA7		fermt3	A0A498N227		nit2	A0A498LLS5		strap	A0A498M9M9		vps29	A0A498NKF0		nnt	A0A498N8P1
chn2	A0A498NNQ8		thbs1	A0A498M5X4		gcfc2	A0A498MHT5		PFKL	A0A498M7R6		uba5	A0A498NDZ0		ap3m1	A0A498NZ89		ap1g1	A0A498NJ31		shmt1	A0A498L5W2		park7	A0A498LYB8		prkcq	A0A498LHZ9		dhx15	A0A498MH82		crkl	A0A498N553		g3bp1	A0A498NTC7		nrd1	A0A498LJ54		rnf103	A0A498MV71
hhipl1	A0A498LKF0		ppih	A0A498M607		rpl12	A0A498LPL3		ruvbl1	A0A498L6Q9		dlg4	A0A498LP01		ap3m2	A0A498NGD5		pdia5	A0A498NHN2		thbs4	A0A498MP89		vac14	A0A498MWP3		rprd1b	A0A498NRW2		rprd1b	A0A498NRW2		p4hb	A0A498M105		park7	A0A498LYB8		dpp3	A0A498N600		atp5j2	A0A498M8D4
ston2	A0A498LKF2		chmp1a	A0A498M640		NKPD1	A0A498NRI4		grpel1	A0A498MDZ5		setd1a	A0A498NPK0		osgep	A0A498N1Z5		pccb	A0A498P434		snx4	A0A498NHT1		psmb1	A0A498N6J0		psme2	A0A498NMM5		psme2	A0A498NMM5		glod4	A0A498L6A7		drg2	A0A498M5H6		ppp2r2d	A0A498LGJ5		mpc2	A0A498NAY0
setd3	A0A498LKG2		espn	A0A498M671		hars	A0A498NES3		mta2	A0A498LCW4		myof	A0A498N3A5		sf3b3	A0A498MBG5		slc38a7	A0A498MQJ7		serpinb1	A0A498NBE7		lasp1	A0A498LWE3		psme1	A0A498N022		psme1	A0A498N022		shmt1	A0A498L5W2		vac14	A0A498MWP3		lasp1	A0A498LWE3		CYTB	V5XVB7
wbp2	A0A498LKH3		AGO3	A0A498M6D2		aldob	A0A498LLJ4		ctnna2	A0A498MTB9		C18orf32	A0A498N8N2		sept2	A0A498MAB6		SLC25A22	A0A498LZI8		serpinc1	A0A498MH64		ckm	A0A498LPZ0		polr2h	A0A498MUI6		polr2h	A0A498MUI6		osbp2	A0A498NJD9		psmb1	A0A498N6J0		ckm	A0A498LPZ0		pi4k2a	A0A498LLY9
ca8	A0A498LKJ0		MRC2	A0A498M6I3		usp14	A0A498N6B6		igf2bp1	A0A498MU51		mvp	A0A498LX76		esd	A0A498N9Q6		endog	A0A498LVA4		dnm1	A0A498N471		hsd17b10	A0A498LBK9		rpl18a	A0A498LIH2		rpl18a	A0A498LIH2		osbp	A0A498LL08		dpp3	A0A498N600		hsd17b10	A0A498LBK9		lrba	A0A498N1F6
hspb8	A0A498LKJ6		actb	A0A498M6I9		slc2a2	A0A498LBV9		drg2	A0A498M5H6		rpl10	A0A498L8B5		srm	A0A498LY23		znf592	A0A498LAI4		suclg2	A0A498MPS1		vps4b	A0A498N0L6		acadvl	A0A498MKU0		acadvl	A0A498MKU0		ppp1r8	A0A498MFC8		ppp2r2d	A0A498LGJ5		vps4b	A0A498N0L6		nbea	A0A498LCP9
slc16a10	A0A498LKJ7		RHEB	A0A498M6L4		prmt5	A0A498NGI1		impdh2	A0A498NDI4		myo1c	A0A498LHU8		ap1g1	A0A498NJ31		erc1	A0A498MPE0		echs1	A0A498MUH8		KATNAL1	A0A498M7J9		g6pd	A0A498NGC9		g6pd	A0A498NGC9		picalm	A0A498LLQ2		lasp1	A0A498LWE3		vps4a	A0A498NFE0		pter	A0A498NZP2
MMP21	A0A498LKL1		mapk3	A0A498M6P1		abce1	A0A498NQD7		lzic	A0A498P0C7		nefl	A0A498N5J2		rpl35	A0A498MJY6		erc2	A0A498MRQ2		prdx2	A0A498LM50		AP3B1	A0A498M1W5		crkl	A0A498N553		iqgap1	A0A498MM11		ranbp3	A0A498N0B4		ckm	A0A498LPZ0		cspg5	A0A498NKU3		pebp1	A0A498NG47
ndufb8	A0A498LKL7		fbn1	A0A498M6Z5		dctn1	A0A498LGX9		srsf2	A0A498LSM2		ATG7	A0A498NJK5		cspg5	A0A498NKU3		adck3	A0A498LD68		aldh6a1	A0A498M1U7		prdx4	A0A498L8V5		p4hb	A0A498M105		drg1	A0A498NSN9		uso1	A0A498NFH4		hsd17b10	A0A498LBK9		KATNAL1	A0A498M7J9		CPNE7	A0A498NJ35
lbr	A0A498LKS9		sh3glb1	A0A498M723		srsf3	A0A498MV30		gmpr2	A0A498MKE8		shmt1	A0A498L5W2		psmd12	A0A498MYH7		ergic1	A0A498MW07		gpx1	A0A498L6S7		snw1	A0A498NLB3		glod4	A0A498L6A7		rusc1	A0A498M085		appl1	A0A498LQ34		vps4b	A0A498N0L6		prdx4	A0A498L8V5		CPNE4	A0A498NKD7
ctsz	A0A498LKT3		RPL27A	A0A498M799		camk2a	A0A498N294		hadha	A0A498LIF2		thbs4	A0A498MP89		btf3l4	A0A498NJ63		pin4	A0A498NU90		glrx3	A0A498LFT5		rtcb	A0A498N2H4		C14orf166	A0A498LP40		nit2	A0A498LLS5		sept2	A0A498MAB6		vps4a	A0A498NFE0		aldh18a1	A0A498LMW6		NLRC5	A0A498MFX3
ano6	A0A498LKV4		hmcn1	A0A498M7C5		dpp9	A0A498LWR2		psmb6	A0A498LJQ3		snap25	A0A498N2T2		SPIDR	A0A498MSK4		mpc2	A0A498NAY0		dmgdh	A0A498MPE4		aldh18a1	A0A498LMW6		ppp2r2d	A0A498LGJ5		crkl	A0A498N553		esd	A0A498N9Q6		prdx4	A0A498L8V5		ogt	A0A498MSU8		slc16a9	A0A498LQI4
sarm1	A0A498LKV6		acox1	A0A498M7H7		cops2	A0A498N4G1		ptbp3	A0A498MJ90		syt1	A0A498LTH2		sugt1	A0A498NED4		CYTB	V5XVB7		acadl	A0A498N4S4		hibadh	A0A498NNB9		drg1	A0A498NSN9		acaca	A0A498M9R9		pak2	A0A498MHP4		snw1	A0A498NLB3		hibadh	A0A498NNB9		crybb2	A0A498P1P5
sod2	A0A498LKV8		psmd2	A0A498M7I3		gnpda2	A0A498NET5		hmgcs1	A0A498LWA2		serpinb1	A0A498NBE7		cstf3	A0A498NC45		gnaq	A0A498MB94		sar1b	A0A498LDZ5		api5	A0A498MBP6		shmt1	A0A498L5W2		p4hb	A0A498M105		srm	A0A498LY23		hibadh	A0A498NNB9		api5	A0A498MBP6		hspb1	A0A498NLH3
men1	A0A498LKV9		KATNAL1	A0A498M7J9		ap1s1	A0A498MJV6		gsk3b	A0A498MAP7		serpinc1	A0A498MH64		igf2bp1	A0A498MU51		akap10	A0A498MS40		ivd	A0A498MHV3		fasn	A0A498LNV7		uso1	A0A498NFH4		glod4	A0A498L6A7		ap1g1	A0A498NJ31		api5	A0A498MBP6		fasn	A0A498LNV7		jakmip2	A0A498N6P6
syne3	A0A498LKW4		scarb2	A0A498M7K2		psmb4	A0A498NBJ4		ppp2r4	A0A498LRM8		lgsn	A0A498LUF4		ube2v1	A0A498LTN4		ap2s1	A0A498M0T3		sord	A0A498L7C3		snrnp70	A0A498NMP8		sept2	A0A498MAB6		shmt2	A0A498N951		rpl35	A0A498MJY6		snrnp70	A0A498NMP8		ube2v1	A0A498LTN4		rsu1	A0A498N579
SSH3	A0A498LKX2		TPP2	A0A498M7L0		prpf4	A0A498MDU5		top1	A0A498NK94		OPLAH	A0A498NLG1		wdr61	A0A498LAT7		pah	A0A498M9N5		acat1	A0A498MP51		rbms2	A0A498NJG1		rpl21	A0A498NSE5		osbp2	A0A498NJD9		cspg5	A0A498NKU3		rbms2	A0A498NJG1		snrnp70	A0A498NMP8		ampd1	A0A498LYA9
papln	A0A498N304		plbd1	A0A498M7Q3		SNX2	A0A498N6C7		smarca5	A0A498LMB5		atp2b4	A0A498LE85		sh3glb2	A0A498LRN4		MAT1A	A0A498MSY9		hsd17b4	A0A498NEL9		psma2	A0A498MW39		esd	A0A498N9Q6		osbp	A0A498LL08		aldh1a2	A0A498L6Y8		psma2	A0A498MW39		rbms2	A0A498NJG1		srl	A0A498MXC3
CCDC86	A0A498LL03		PFKL	A0A498M7R6		dld	A0A498LAH2		arih2	A0A498LST9		atp2b2	A0A498NJB6		cdk7	A0A498MNJ6		NLRC5	A0A498MFX3		snx12	A0A498LH99		crk	A0A498LHE2		srm	A0A498LY23		osgep	A0A498N1Z5		psmd12	A0A498MYH7		C14orf166	A0A498LP40		psma2	A0A498MW39		pptc7	A0A498MVX4
mrpl38	A0A498LL07		dapl1	A0A498M7T0		lmnb1	A0A498LZD2		ehd3	A0A498LKP9		echs1	A0A498MUH8		fh	A0A498LTT9		CPNE4	A0A498NKD7		snx3	A0A498LKX7		cdc73	A0A498N0A6		rpl35	A0A498MJY6		picalm	A0A498LLQ2		lars	A0A498N4V8		crk	A0A498LHE2		C14orf166	A0A498LP40		neb	A0A498N3Y5
osbp	A0A498LL08		srprb	A0A498M7U4		eif3a	A0A498L5W0		NAPSA	A0A498NLQ0		aco1	A0A498MTB1		psmb3	A0A498MYG1		CPNE7	A0A498NJ35		efhd2	A0A498LP25		dcaf7	A0A498NN52		cspg5	A0A498NKU3		uso1	A0A498NFH4		dcaf7	A0A498NN52		ERAP1	A0A498NJS0		faf1	A0A498NRK1		snrpb	A0A498NF52
osbp2	A0A498MJU4		rab15	A0A498M7U6		carm1	A0A498N662		SUCLA2	A0A498NNW1		prdx1	A0A498M0B1		g6pd	A0A498NGC9		cops5	A0A498MZ60		epn1	A0A498N5R3		rpl32	A0A498MLZ6		stk26	A0A498N9U1		EIF5A	A0A498MEW8		btf3l4	A0A498NJ63		actr3b	A0A498NRS4		crk	A0A498LHE2		esyt1	A0A498P1N8
dlg3	A0A498LL25		cdk16	A0A498M7X4		rpl18	A0A498NPB6		cfl2	A0A498MQK3		aldh6a1	A0A498M1U7		etfdh	A0A498LWE7		csrp2	A0A498NZS0		crmp1	A0A498MGP7		bpnt1	A0A498N514		aldh1a2	A0A498L6Y8		appl1	A0A498LQ34		uroc1	A0A498LEI0		eif3e	A0A498LFI9		chd4	A0A498NJC5		xrcc5	A0A498MC33
dlg4	A0A498LP01		apoa1bp	A0A498M809		rpl7	A0A498LJU3		RAB37	A0A498LTK1		ldhd	A0A498MUN0		atmin	A0A498LLW6		dars	A0A498N790		slc3a1	A0A498N651		fermt3	A0A498N227		lars	A0A498N4V8		sept2	A0A498MAB6		pfkfb2	A0A498LRR2		bpnt1	A0A498N514		fam32a	A0A498MUZ0		ELOA	A0A498MX46
dlg2	A0A498M390		psma8	A0A498M831		MAP1A	A0A498MEJ1		rab27b	A0A498N7M2		ivd	A0A498MHV3		cul1	A0A498LED4		nck1	A0A498M3P0		ppm1a	A0A498MDX5		gmps	A0A498LQI3		kiaa0196	A0A498MGE1		esd	A0A498N9Q6		scin	A0A498MSB3		prrc1	A0A498M377		bpnt1	A0A498N514		capza1	A0A498MN53
arr3	A0A498LL34		chdh	A0A498M851		gpi	A0A498MUB2		rab30	A0A498MYA6		sord	A0A498L7C3		cpne3	A0A498N8C4		nck2	A0A498M8A4		snap25	A0A498LLP4		tbl1xr1	A0A498MPR5		btf3l4	A0A498NJ63		cdc16	A0A498N748		ube2m	A0A498MC44		kif5c	A0A498N878		fermt3	A0A498N227		ccdc88c	A0A498LRY7
ndufaf5	A0A498LL35		mfap2	A0A498M8B4		ruvbl2	A0A498LQK9		rab27a	A0A498NT07		ehd3	A0A498LKP9		ppa1	A0A498LL47		kif2a	A0A498NYD1		nt5dc3	A0A498MJV1		prrc1	A0A498M377		ogt	A0A498MSU8		dcun1d1	A0A498NTJ8		hsf4	A0A498MEH9		kif5b	A0A498M763		prkcq	A0A498LHZ9		atp6v1g1	A0A498M939
npnt	A0A498LL42		atp5j2	A0A498M8D4		pam	A0A498LXA1		rab4a	A0A498MY60		pmp2	A0A498MRU3		gart	A0A498MHY3		ctnnbl1	A0A498NQE6		hk1	A0A498N0I6		prkcq	A0A498LHZ9		SPIDR	A0A498MSK4		pak1	A0A498NT33		capns1	A0A498LHL4		prkcq	A0A498LHZ9		prkce	A0A498N798		ube2h	A0A498ML75
chl1	A0A498LL63		hsp90b1	A0A498M8E6		kpna4	A0A498M1B8		rab3c	A0A498NR85		fabp3	A0A498MWH4		igf2bp2	A0A498L8U9		rtca	A0A498MM56		hkdc1	A0A498N424		prkce	A0A498N798		ehd3	A0A498LKP9		srm	A0A498LY23		EIF3L	A0A498N9L1		prkce	A0A498N798		prkcd	A0A498L5W8		dcaf7	A0A498NN52
bub3	A0A498LL89		mdk	A0A498M8K8		prdx1	A0A498M0B1		rab3b	A0A498LLB3		snx12	A0A498LH99		zmpste24	A0A498NCP1		tollip	A0A498MVA6		slc38a7	A0A498MQJ7		rprd1b	A0A498NRW2		sugt1	A0A498NED4		ap1g1	A0A498NJ31		iqgap2	A0A498NQN9		prkcd	A0A498L5W8		prkcb	A0A498NMH1		phkb	A0A498M8P5
cd34	A0A498LL90		scp2	A0A498M8P4		HSPA4L	A0A498LWX6		rab3d	A0A498NQ75		crmp1	A0A498MGP7		ubqln4	A0A498NQC9		csnk1a1	A0A498NCK2		elavl2	A0A498NML0		psme2	A0A498NMM5		capns1	A0A498LHL4		rpl35	A0A498MJY6		ube2v1	A0A498LTN4		prkca	A0A498MTD2		rprd1b	A0A498NRW2		dnaja2	A0A498ME23
stat2	A0A498LL98		cpeb1	A0A498M8V5		rps6ka3	A0A498MVB5		thoc6	A0A498NPP4		acadl	A0A498N4S4		got1	A0A498LHI8		PLCB4	A0A498NTC0		map1lc3a	A0A498MSG3		psme1	A0A498N022		eif3e	A0A498LFI9		cspg5	A0A498NKU3		acot7	A0A498LYK0		prkcb	A0A498NMH1		DDB1	A0A498LQ23		usp5	A0A498N1H3
pus10	A0A498LLA7		atp6v1g1	A0A498M939		nbea	A0A498LCP9		rab39b	A0A498LGI2		dpys	A0A498L4W1		ak2	A0A498LIT6		jakmip2	A0A498N6P6		tufm	A0A498NTL2		polr2h	A0A498MUI6		klc1	A0A498MWF4		aldh1a2	A0A498L6Y8		fh	A0A498LTT9		h6pd	A0A498LNH7		h6pd	A0A498LNH7		mapk12	A0A498LTL2
agxt2	A0A498LLD3		cryab	A0A498M948		lrba	A0A498N1C2		rab4b	A0A498M0T0		anxa10	A0A498MXP6		ptpra	A0A498NKD0		igf2bp2	A0A498L8U9		tollip	A0A498MVA6		rpl18a	A0A498LIH2		DHX35	A0A498MG05		psmd12	A0A498MYH7		psmb3	A0A498MYG1		g6pd	A0A498NGC9		g6pd	A0A498NGC9		mylk	A0A498NP17
kctd7	A0A498LLD6		rtn1	A0A498M998		naa15	A0A498N8D7		rab12	A0A498MTM6		ppm1a	A0A498MCG3		hyou1	A0A498LY34		pptc7	A0A498MVX4		CYTH2	A0A498M5E2		acadvl	A0A498MKU0		ANK2	A0A498MI53		btf3l4	A0A498NJ63		etfdh	A0A498LWE7		psme2	A0A498NMM5		pold1	A0A498LX53		mapk14	A0A498NV34
slc1a5	A0A498LLF1		parva	A0A498M9A8		ddi2	A0A498L5Z7		rab9a	A0A498P559		slc3a1	A0A498N651		vbp1	A0A498MJQ0		myo6	A0A498MBZ1		fabp3	A0A498MWH4		g6pd	A0A498NGC9		ube2v1	A0A498LTN4		dnm1	A0A498N471		prpf6	A0A498NW67		psme1	A0A498N022		psme2	A0A498NMM5		vps35	A0A498MDH6
gch1	A0A498LLF2		psmd3	A0A498M9B4		nup93	A0A498MB05		rpn1	A0A498NHG3		slc38a7	A0A498MQJ7		gmfb	A0A498LA25		neb	A0A498N3Y5		pmp2	A0A498MRU3		drg1	A0A498NSN9		mtor	A0A498LWP3		sugt1	A0A498NED4		atmin	A0A498LLW6		polr2h	A0A498MUI6		psme1	A0A498N022		mcee	A0A498L6Z5
col10a1	A0A498M906		plxna4	A0A498M9K4		rsu1	A0A498N579		acadm	A0A498LBY9		calb2	A0A498MBC2		cops3	A0A498N2D1		erh	A0A498LGY3		actr3b	A0A498NRS4		nit2	A0A498LLS5		bzw1	A0A498LKG8		capns1	A0A498LHL4		gipc2	A0A498NT68		rpl18a	A0A498LIH2		polr2h	A0A498MUI6		ndufa10	A0A498NBA5
aptx	A0A498LLG6		dcn	A0A498M9M2		ppa1	A0A498LL47		csnk2a2	A0A498MCY8		hkdc1	A0A498N424		yars	A0A498N049		kdm1a	A0A498MN14		aldh1a3	A0A498MHF6		crkl	A0A498N553		fh	A0A498LTT9		eif3e	A0A498LFI9		cpne3	A0A498N8C4		acadvl	A0A498MKU0		dnm2	A0A498M3Y7		cbr1	A0A498NJN0
ddx47	A0A498L5B4		strap	A0A498M9M9		igf2bp3	A0A498NAX1		gsr	A0A498N4Q6		myh7b	A0A498MFA4		bub3	A0A498LL89		xrcc5	A0A498MC33		aldh9a1	A0A498NRW6		gfpt2	A0A498LPI3		AHNAK2	A0A498MWM5		ddx23	A0A498NGG1		iars	A0A498NJ41		iqgap1	A0A498MM11		rpl18a	A0A498LIH2		myl2	A0A498NR32
rbbp5	A0A498LBC2		pah	A0A498M9N5		srp54	A0A498MQC4		nsa2	A0A498NQU3		hspa12a	A0A498P302		msh2	A0A498LN88		pdcd6	A0A498MR44		aldh3b1	A0A498N2C4		p4hb	A0A498M105		etfdh	A0A498LWE7		iqgap2	A0A498NQN9		kif5b	A0A498M763		drg1	A0A498NSN9		crkl	A0A498N553		mybpc3	A0A498M8F9
crip1	A0A498LGM3		myl3	A0A498M9S8		sept5	A0A498LUE9		mapk14	A0A498NV34		map1lc3a	A0A498MSG3		sec23ip	A0A498P0P1		mat2b	A0A498LGG2		aldh1a2	A0A498L6Y8		glod4	A0A498L6A7		atmin	A0A498LLW6		ube2v1	A0A498LTN4		ppa1	A0A498LL47		rusc1	A0A498M085		acaca	A0A498M9R9		PLCB4	A0A498NSX7
dhrs13	A0A498LHI3		lrrc17	A0A498M9T9		psmd12	A0A498MYH7		urod	A0A498LJC4		adsl	A0A498MZR2		hat1	A0A498LNL0		ostf1	A0A498MRW3		RAB21	A0A498N7R7		shmt2	A0A498N951		hsf4	A0A498MEH9		wdr61	A0A498LAT7		pfdn1	A0A498NYC1		nit2	A0A498LLS5		p4hb	A0A498M105		ugdh	A0A498N1B2
ppif	A0A498LM82		copg2	A0A498M9V6		kpna5	A0A498NIJ2		atp6v1d	A0A498NK38		rufy3	A0A498MAE6		rpl31	A0A498MC52		rpl13a	A0A498NBD8		ncald	A0A498LGU7		C14orf166	A0A498LP40		cpne3	A0A498N8C4		fh	A0A498LTT9		ptpn1	A0A498MHR0		crkl	A0A498N553		shmt1	A0A498L5W2		apoa1bp	A0A498M809
rdh12	A0A498LUW8		dhrs7	A0A498M9V7		kcmf1	A0A498ME58		prkacb	A0A498NE56		tollip	A0A498MVA6		cops2	A0A498N4G1		efhd2	A0A498LP25		HPCAL1	A0A498LDM3		ppp2r2d	A0A498LGJ5		iars	A0A498NJ41		psmb3	A0A498MYG1		add1	A0A498N6U6		gfpt2	A0A498LPI3		LMTK3	A0A498NJ80		SEPT12	A0A498N0P4
ppid	A0A498LWH4		lama4	A0A498M9X2		nsfl1c	A0A498LA40		frmd6	A0A498LS50		napb	A0A498MS39		rars	A0A498LTZ7		efhd1	A0A498L9R3		adk	A0A498N453		mcm6	A0A498NNW8		add3	A0A498LDW5		kdm1a	A0A498MN14		add3	A0A498LDW5		p4hb	A0A498M105		osbp2	A0A498MJU4		npepl1	A0A498MZQ6
pah	A0A498M9N5		snx8	A0A498M9Z7		tbc1d1	A0A498L925		tardbp	A0A498LTK5		aldh1a3	A0A498MHF6		anxa6	A0A498LVS6		adh5	A0A498MXR4		lgals8	A0A498M7S6		shmt1	A0A498L5W2		igf2bp2	A0A498L8U9		etfdh	A0A498LWE7		eif3e	A0A498LFI9		shmt1	A0A498L5W2		osbp	A0A498LL08		cacnb1	A0A498LX45
samhd1	A0A498MIM7		FTHL17	A0A498M9Z8		pgm2	A0A498N046		setd1a	A0A498NPK0		aldh9a1	A0A498NRW6		usp9x	A0A498N7E8		CTBP1	A0A498LQ97		arl3	A0A498MW00		ppp1r8	A0A498MFC8		igf2bp3	A0A498NAX1		prpf6	A0A498NW67		igf2bp2	A0A498L8U9		osbp2	A0A498MJU4		mcm6	A0A498NNW8		igf2bp2	A0A498L8U9
RGPD5	A0A498MN61		slc25a20	A0A498MA61		rps16	A0A498LS35		RRM1	A0A498LIA0		aldh3b1	A0A498N2C4		ap1m2	A0A498NL71		RPS6KA2	A0A498N7E2		hmgcs1	A0A498LWA2		ranbp3	A0A498N0B4		zmpste24	A0A498NCP1		atmin	A0A498LLW6		igf2bp3	A0A498NAX1		osbp	A0A498LL08		osgep	A0A498N1Z5		exosc4	A0A498N898
vrk3	A0A498MQK5		nhp2l1	A0A498MA66		paics	A0A498MUQ6		dctn4	A0A498LYU8		me3	A0A498NAP3		elavl3	A0A498MPM9		ELOA	A0A498MX46		lancl2	A0A498LF21		uso1	A0A498NFH4		sf3b3	A0A498MBG5		hsf4	A0A498MEH9		zmpste24	A0A498NCP1		osgep	A0A498N1Z5		picalm	A0A498LLQ2		edf1	A0A498LRJ3
rdh14	A0A498N127		ufl1	A0A498MAA7		gars	A0A498NS73		myof	A0A498N3A5		jakmip2	A0A498N6P6		elavl4	A0A498NS54		g6pd	A0A498NGC9		EIF5A	A0A498MEW8		sept2	A0A498MAB6		got1	A0A498LHI8		ipo5	A0A498NA00		rpl13a	A0A498NBD8		picalm	A0A498LLQ2		sept2	A0A498MAB6		myh7b	A0A498MFA4
aar2	A0A498N663		sept2	A0A498MAB6		top2b	A0A498LY18		efhd1	A0A498L9R3		ogt	A0A498MSU8		elavl2	A0A498NML0		add3	A0A498LDW5		ctnnbl1	A0A498NQE6		cstf3	A0A498NC45		ak2	A0A498LIT6		cpne3	A0A498N8C4		hmbs	A0A498N9V5		uso1	A0A498NFH4		rpl21	A0A498NSE5		ik	A0A498NA94
ppie	A0A498N6L6		sec13	A0A498MAC6		smarcd1	A0A498NID7		efhd2	A0A498LP25		srpx	A0A498N4E7		prdx2	A0A498LM50		cse1l	A0A498MSB4		nefl	A0A498MI91		hsf4	A0A498MEH9		snx6	A0A498MDJ5		iars	A0A498NJ41		got1	A0A498LHI8		appl1	A0A498LQ34		esd	A0A498N9Q6		DCX	A0A498NMA4
zmiz2	A0A498N9I9		uchl5	A0A498MAE5		acat1	A0A498MP51		mvp	A0A498LX76		arl3	A0A498MW00		nup107	A0A498LTM5		nrd1	A0A498LJ54		ahcyl1	A0A498N8Y0		srm	A0A498LY23		mars	A0A498NF02		ppa1	A0A498LL47		C14orf166	A0A498LP40		sept2	A0A498MAB6		rpl23a	A0A498NCC9		eprs	A0A498LPV0
jak1	A0A498NAB0		arhgap1	A0A498MAL1		CSNK2A1	A0A498LV59		cpeb3	A0A498LUK4		EIF5A	A0A498MEW8		iars2	A0A498N5U1		DDB1	A0A498LQ23		rab18	A0A498LVL4		osbp	A0A498LL08		usp39	A0A498N859		ptpn1	A0A498MHR0		ak2	A0A498LIT6		rpl21	A0A498NSE5		ap3d1	A0A498MUR0		sod1	A0A498LF02
me3	A0A498NAP3		cryl1	A0A498MAL2		csnk2a2	A0A498MCY8		cpeb4	A0A498NTA6		slc2a2	A0A498LBV9		tsnax	A0A498LQL6		smarcc1	A0A498NKA7		txlna	A0A498LYA1		rpl35	A0A498MJY6		arcn1	A0A498N7H4		add3	A0A498LDW5		ptpra	A0A498NKD0		esd	A0A498N9Q6		srm	A0A498LY23		nprl3	A0A498NFT9
tbccd1	A0A498NB66		rnf114	A0A498MAL6		cul1	A0A498LED4		thbs4	A0A498MP89		ahcyl1	A0A498N8Y0		DDB1	A0A498LQ23		ccdc88c	A0A498LRY7		fabp7	A0A498LTJ0		cspg5	A0A498NKU3		gmfb	A0A498LA25		pcna	A0A498MYE6		snx6	A0A498MDJ5		pak2	A0A498MHP4		rpl35	A0A498MJY6		ech1	A0A498NP92
stat4	A0A498NHR6		ARPIN	A0A498MAU7		best2	A0A498LUM0		snap25	A0A498LLP4		ass1	A0A498MVZ3		grpel1	A0A498MDZ5		rnf20	A0A498LLK7		rpl21	A0A498NSE5		stk26	A0A498N9U1		snap91	A0A498NIL3		zmpste24	A0A498NCP1		mars	A0A498NF02		pak1	A0A498NT33		psmd12	A0A498MYH7		kpna4	A0A498M1B8
me1	A0A498NJ16		lcp1	A0A498MAX9		ipo7	A0A498MKX6		MAT1A	A0A498MSY9		rab18	A0A498NTT7		impdh2	A0A498NDI4		cpt2	A0A498NR22		cdk5rap3	A0A498LSG3		psmd12	A0A498MYH7		ctnna2	A0A498MTB9		hmbs	A0A498N9V5		mvd	A0A498MM36		srm	A0A498LY23		lars	A0A498N4V8		adss	A0A498LEX5
cryba2	A0A498NN55		sept10	A0A498MAY9		kif5c	A0A498NB35		sept6	A0A498LGV3		RAB21	A0A498N7R7		srsf2	A0A498LSM2		exoc5	A0A498M1V8		glo1	A0A498LP57		kiaa0196	A0A498MGE1		strap	A0A498M9M9		got1	A0A498LHI8		snd1	A0A498MKL8		rpl35	A0A498MJY6		btf3l4	A0A498NJ63		gbas	A0A498LR17
crybb2	A0A498P1P5		alad	A0A498MB86		abcf2	A0A498M8N9		rps6ka3	A0A498MVB5		txlna	A0A498LYA1		msh6	A0A498LP98		prkag1	A0A498LH41		bckdha	A0A498LC60		btf3l4	A0A498NJ63		rtcb	A0A498N2H4		C14orf166	A0A498LP40		bub3	A0A498LL89		cspg5	A0A498NKU3		dr1	A0A498M116		PFKL	A0A498M7R6
cfi	A0A498LKR5		aox1	A0A498MB87		fubp3	A0A498MUZ4		suclg2	A0A498MPS1		crabp1	A0A498LAL7		hadha	A0A498LIF2		efr3a	A0A498NS71		ssr3	A0A498MN87		dnm1	A0A498N471		EIF3L	A0A498N9L1		ak2	A0A498LIT6		sec23ip	A0A498P0P1		psmd12	A0A498MYH7		scin	A0A498MSB3		tnni1	A0A498MJC0
fdxr	A0A498LLL7		gnaq	A0A498MB94		ctsd	A0A498LV43		rpe	A0A498NB21		bckdha	A0A498LC60		eif3m	A0A498NED7		eef1d	A0A498NSH4		nup153	A0A498MWU9		SPIDR	A0A498MSK4		bub3	A0A498LL89		ptpra	A0A498NKD0		hat1	A0A498LNL0		btf3l4	A0A498NJ63		hsf4	A0A498MEH9		myl10	A0A498N5U9
aimp1	A0A498LLM0		pgm5	A0A498MBC1		kcnh4	A0A498LZM8		echs1	A0A498MUH8		parp1	A0A498LGP1		psmb6	A0A498LJQ3		mylk	A0A498NP17		myo1c	A0A498LHJ3		sugt1	A0A498NED4		gfpt2	A0A498LPI3		hyou1	A0A498LY34		rpl31	A0A498MC52		ABCF3	A0A498NA79		cstf3	A0A498NC45		cpe	A0A498L8V7
chp1	A0A498LVS8		f10	A0A498MBE1		rab5a	A0A498MZU2		aco1	A0A498MTB1		stk26	A0A498N9U1		ptbp3	A0A498MJ90		mapk12	A0A498LTL2		tmem33	A0A498N5A5		capns1	A0A498LHL4		rpl31	A0A498MC52		snx6	A0A498MDJ5		rars	A0A498LTZ7		ube2m	A0A498MC44		skiv2l2	A0A498MEF2		c3	A0A498LT59
sult6b1	A0A498LLM4		rab11a	A0A498MBF7		tmem214	A0A498LN85		aldh6a1	A0A498M1U7		KATNAL1	A0A498M7J9		ptbp1	A0A498LJP8		mapk14	A0A498NV34		AP3B1	A0A498M1W5		EIF3L	A0A498N9L1		rars	A0A498LTZ7		mars	A0A498NF02		klc1	A0A498MWF4		capns1	A0A498LHL4		capns1	A0A498LHL4		fbn1	A0A498M6Z5
popdc3	A0A498LLN8		slc25a24	A0A498MBM2		SPIDR	A0A498MSK4		acadl	A0A498N4S4		eprs	A0A498LPV0		ppp2r4	A0A498LRM8		tmem214	A0A498LN85		ero1l	A0A498LKD0		iqgap2	A0A498NQN9		GBF1	A0A498N847		mvd	A0A498MM36		DHX35	A0A498MG05		ckb	A0A498MSZ6		eif3e	A0A498LFI9		TTN	A0A498NZ39
dicer1	A0A498LLS1		api5	A0A498MBP6		dock7	A0A498NUB8		sar1b	A0A498LDZ5		git1	A0A498LQL3		polr2c	A0A498MLT3		tjp2	A0A498MYC9		arf6	A0A498NTC1		nrd1	A0A498LJ54		ap1m2	A0A498NL71		gmfb	A0A498LA25		ap1m2	A0A498NL71		klc1	A0A498MWF4		EIF3L	A0A498N9L1		PHKA2	A0A498NR97
nit2	A0A498LLS5		hpd	A0A498MBR0		pfas	A0A498MXI8		ivd	A0A498MHV3		ap1g1	A0A498NJ31		arih2	A0A498LST9		agap1	A0A498MTB7		col12a1	A0A498M2L1		ube2v1	A0A498LTN4		prdx2	A0A498LM50		snap91	A0A498NIL3		cops2	A0A498N4G1		DHX35	A0A498MG05		iqgap2	A0A498NQN9		col12a1	A0A498NK49
ufd1l	A0A498LLT9		myo6	A0A498MBZ1		fam171a1	A0A498NCE6		sord	A0A498L7C3		rps28	A0A498P454		fscn1	A0A498LAK0		AGAP3	A0A498MXZ1		stk26	A0A498N9U1		acot7	A0A498LYK0		psmd12	A0A498MYH7		ctnna2	A0A498MTB9		top2b	A0A498LY18		ube2v1	A0A498LTN4		igf2bp1	A0A498MU51		usp14	A0A498N6B6
ghitm	A0A498LLU7		fam129a	A0A498MC09		cstf3	A0A498NC45		pc	A0A498NVD1		cyfip2	A0A498LTV0		inpp5d	A0A498L8Q0		sept10	A0A498MAY9		gosr2	A0A498LAH1		fh	A0A498LTT9		PFKL	A0A498M7R6		snd1	A0A498MKL8		elavl3	A0A498MPM9		xpo7	A0A498MMK2		gars	A0A498NS73		sod2	A0A498LKV8
cd55	A0A498LLV3		hao1	A0A498MC15		sf3b3	A0A498MBG5		acat1	A0A498MP51		eif2a	A0A498NTQ4		NAPSA	A0A498NLQ0		gfpt2	A0A498LPI3		cyfip2	A0A498LTV0		psmb3	A0A498MYG1		dnm1	A0A498N471		strap	A0A498M9M9		elavl4	A0A498NS54		bzw1	A0A498LKG8		top2a	A0A498NT58		ndufa6	A0A498MHB9
arid4b	A0A498LLW2		xrcc5	A0A498MC33		golga3	A0A498NG76		hsd17b4	A0A498NEL9		elmo1	A0A498N309		pc	A0A498NTR3		KCTD12	A0A498LBV4		tub	A0A498MYE8		atmin	A0A498LLW6		grpel1	A0A498MDZ5		bub3	A0A498LL89		elavl2	A0A498NML0		fh	A0A498LTT9		cab39l	A0A498NJV9		atp6v1c1	A0A498N769
atmin	A0A498LLW6		ube2m	A0A498MC44		pdia3	A0A498MDR7		HNRNPH3	A0A498NDF4		trip11	A0A498LYY9		SUCLA2	A0A498NNW1		mcee	A0A498L6Z5		rras	A0A498NPH6		inpp5d	A0A498L8Q0		drg2	A0A498M5H6		EIF3L	A0A498N9L1		alkbh4	A0A498MMB3		ranbp3	A0A498N0B4		acot7	A0A498LYK0		csrp2	A0A498NZS0
syf2	A0A498LLY0		rpl31	A0A498MC52		EIF4G3	A0A498LQD7		snx12	A0A498LH99		ada	A0A498MY71		cfl2	A0A498MQK3		RAB31	A0A498LEZ9		trip12	A0A498MF43		gipc2	A0A498NT68		impdh2	A0A498NDI4		rpl31	A0A498MC52		prdx2	A0A498LM50		psmb3	A0A498MYG1		fh	A0A498LTT9		mfap2	A0A498M8B4
pi4k2a	A0A498LLY9		nt5c3b	A0A498MC78		usp9x	A0A498N7E8		crmp1	A0A498MGP7		yars	A0A498N049		RAB37	A0A498LTK1		GNAZ	A0A498MXC9		taok2	A0A498MM58		ipo5	A0A498NA00		uap1l1	A0A498LPN6		rars	A0A498LTZ7		iars2	A0A498N5U1		etfdh	A0A498LWE7		RBM12	A0A498MKR7		dnajb1	A0A498MBS7
mtrf1l	A0A498LLZ9		fam101a	A0A498MCA7		rpl23a	A0A498NCC9		dpys	A0A498L4W1		api5	A0A498MBP6		rab27b	A0A498N7M2		nckap1	A0A498N459		trip11	A0A498LYY9		cpne3	A0A498N8C4		srsf2	A0A498LSM2		kif5b	A0A498M763		sf3b1	A0A498NAS7		atmin	A0A498LLW6		atmin	A0A498LLW6		tmem38a	A0A498LV44
gnpnat1	A0A498LM02		ppm1a	A0A498MCG3		slc6a1	A0A498NJH5		slc38a7	A0A498MQJ7		gmfb	A0A498LA25		rab30	A0A498MYA6		rock2	A0A498LQC0		ada	A0A498MY71		kif5b	A0A498M763		gmpr2	A0A498MKE8		cpne8	A0A498MLG3		hspb1	A0A498NLH3		hsf4	A0A498MEH9		kcnh4	A0A498LZM8		myom2	A0A498N3K3
FBLN7	A0A498LM03		bag6	A0A498MCG5		ufd1l	A0A498LLT9		calb2	A0A498MBC2		ube2l3	A0A498LC94		rab27a	A0A498NT07		casp7	A0A498LWI8		bysl	A0A498MP79		pfdn1	A0A498NYC1		flii	A0A498LDS4		abr	A0A498MTF1		rad21	A0A498MSE0		kcnh4	A0A498LZM8		rab5a	A0A498MZU2		mri1	A0A498N520
prdx4	A0A498L8V5		clic1	A0A498MCJ8		gapvd1	A0A498MEX2		OGDHL	A0A498MQY5		arpc4	A0A498MR69		rab4a	A0A498MY60		casp3	A0A498N149		kpna3	A0A498NKE3		add3	A0A498LDW5		hadha	A0A498LIF2		bcr	A0A498NKW6		ctnna2	A0A498MTB9		rab5a	A0A498MZU2		cpne3	A0A498N8C4		nid2	A0A498LTT6
prdx2	A0A498LM50		dcps	A0A498MCN8		isoc1	A0A498M060		syt1	A0A498LTH2		best2	A0A498LUM0		rab3c	A0A498NR85		hdlbp	A0A498LCI4		snrnp70	A0A498NMP8		add1	A0A498N6U6		nampt	A0A498NA34		nup107	A0A498LTM5		impdh2	A0A498NDI4		cpne3	A0A498N8C4		pfdn1	A0A498NYC1		PDE1C	A0A498N0F5
prdx1	A0A498M0B1		atad3a	A0A498MCP4		strap	A0A498M9M9		map1lc3a	A0A498MSG3		usp5	A0A498N1H3		rab3b	A0A498LLB3		srl	A0A498MXC3		dhx15	A0A498MH82		eif3e	A0A498LFI9		ISYNA1	A0A498MX03		iars2	A0A498N5U1		uap1l1	A0A498LPN6		pfdn1	A0A498NYC1		slc9b2	A0A498ML40		pde1a	A0A498N0M8
PSD	A0A498LM62		NHLRC3	A0A498MCR3		uap1	A0A498NU86		adsl	A0A498MZR2		cnn3	A0A498N571		aire	A0A498LNQ2		mybpc3	A0A498M8F9		ik	A0A498NA94		FAM49B	A0A498N1Q0		eif3m	A0A498NED7		rufy3	A0A498MAE6		uap1	A0A498NU86		add1	A0A498N6U6		ptpn1	A0A498MHR0		smyd1	A0A498M2F7
tsga10	A0A498LM66		RMDN1	A0A498MCU4		g3bp1	A0A498NTC7		rufy3	A0A498MAE6		ppa1	A0A498LL47		rab3d	A0A498NQ75		ahcyl1	A0A498N8Y0		usp5	A0A498N1H3		igf2bp2	A0A498L8U9		polr2b	A0A498NA51		npepps	A0A498L5J2		srsf2	A0A498LSM2		add3	A0A498LDW5		top1	A0A498NK94		RYR2	A0A498LMF6
yeats4	A0A498LM70		rpl22l1	A0A498MCU8		park7	A0A498LYB8		CYTH2	A0A498M5E2		acsl6	A0A498MEQ1		thoc6	A0A498NPP4		parva	A0A498M9A8		scp2	A0A498M8P4		zmpste24	A0A498NCP1		psmb6	A0A498LJQ3		faf1	A0A498NRK1		pcmt1	A0A498MN94		gart	A0A498MHY3		add3	A0A498LDW5		vapb	A0A498LN48
ascc1	A0A498LM91		csnk2a2	A0A498MCY8		drg2	A0A498M5H6		dnm1	A0A498N471		st13	A0A498NMR0		rab39b	A0A498LGI2		exosc4	A0A498N898		acaa1	A0A498LP08		psme3	A0A498LWL0		ptbp3	A0A498MJ90		rad21	A0A498MSE0		hadha	A0A498LIF2		igf2bp2	A0A498L8U9		gart	A0A498MHY3		kntc1	A0A498LQH0
gpx7	A0A498LMD6		rps18	A0A498MD37		vac14	A0A498MWP3		napb	A0A498MS39		ugdh	A0A498N1B2		rab9a	A0A498NNX0		ddah2	A0A498MD47		pin4	A0A498NU90		got1	A0A498LHI8		ppp2r4	A0A498LRM8		impdh2	A0A498NDI4		nampt	A0A498NA34		igf2bp3	A0A498NAX1		igf2bp2	A0A498L8U9		pvalb	A0A498LE30
acyp2	A0A498LMD9		ddah2	A0A498MD47		psmb1	A0A498N6J0		arl3	A0A498MW00		gfpt2	A0A498LPI3		rab4b	A0A498M0T0		DDAH1	A0A498M2T9		abcb1	A0A498N7F2		ak2	A0A498LIT6		naa15	A0A498N8D7		srsf2	A0A498LSM2		xpo7	A0A498MMK2		zmpste24	A0A498NCP1		zmpste24	A0A498NCP1		jph1	A0A498MWV9
raly	A0A498LMG1		gys2	A0A498MD49		dpp3	A0A498N600		fabp3	A0A498MWH4		ctnnd1	A0A498MKM0		rab12	A0A498MTM6		dtymk	A0A498L8C8		SLC39A3	A0A498MYF6		ptpra	A0A498NKD0		usp9x	A0A498N7E8		set	A0A498NHZ1		asns	A0A498M0X4		psme3	A0A498LWL0		psme3	A0A498LWL0		cacnb4.1	A0A498NNF1
KRT222	A0A498LMG4		alkbh3	A0A498MD60		ppp2r2d	A0A498LGJ5		pmp2	A0A498MRU3		nnt	A0A498N8P1		ckmt2	A0A498LEJ3		dip2b	A0A498L6F7		ugdh	A0A498N1B2		hyou1	A0A498LY34		cyfip2	A0A498LPC1		ppid	A0A498LWH4		psmb6	A0A498LJQ3		ubqln4	A0A498NQC9		ubqln4	A0A498NQC9		cacnb4	A0A498NHT2
acadsb	A0A498LMG7		vasp	A0A498MD67		lasp1	A0A498LWE3		aldh1a3	A0A498MHF6		gys2	A0A498MD49		rpn1	A0A498NHG3		gmpr2	A0A498MKE8		me1	A0A498NJ16		snx6	A0A498MDJ5		isoc1	A0A498M060		flii	A0A498LDS4		ptbp3	A0A498MJ90		got1	A0A498LHI8		got1	A0A498LHI8		nans	A0A498MGP0
diras1	A0A498LMH2		aars	A0A498MDH5		ckm	A0A498LPZ0		aldh9a1	A0A498NRW6		gys1	A0A498LZL8		acadm	A0A498LBY9		sod1	A0A498LF02		gclc	A0A498MZ28		mars	A0A498NF02		snx9	A0A498N326		atp6v1c1	A0A498N769		rcc1	A0A498L913		ak2	A0A498LIT6		ak2	A0A498LIT6		ITGB1BP2	A0A498MY33
itgb3	A0A498LMH6		vps35	A0A498MDH6		hsd17b10	A0A498LBK9		aldh3b1	A0A498N2C4		c3	A0A498MKU4		gsr	A0A498N4Q6		myl2	A0A498NR32		ctnnd1	A0A498MKM0		mvd	A0A498MM36		fscn1	A0A498LAK0		pcmt1	A0A498MN94		ppp2r4	A0A498LRM8		ptpra	A0A498NKD0		hspa4	A0A498NTF6		gpd1l	A0A498LFE6
thyn1	A0A498LMI2		snx6	A0A498MDJ5		vps4a	A0A498NFE0		jakmip2	A0A498N6P6		hdlbp	A0A498LCI4		chmp2a	A0A498LNM5		ech1	A0A498NP92		sardh	A0A498MXH8		picalm	A0A498LLQ2		fscn2	A0A498MVZ0		hadha	A0A498LIF2		polr2c	A0A498MLT3		hyou1	A0A498LY34		vbp1	A0A498MJQ0		snx8	A0A498M9Z7
MYPN	A0A498LMJ9		psma3	A0A498MDK5		vps4b	A0A498N0L6		adh5	A0A498MXR4		ephx2	A0A498NP55		dsp	A0A498M167		arvcf	A0A498NK53		nnt	A0A498N8P1		snap91	A0A498NIL3		inpp5d	A0A498L8Q0		snrpb	A0A498NF52		cyfip2	A0A498LPC1		snx6	A0A498MDJ5		snx6	A0A498MDJ5		clic2	A0A498LIJ7
reep2	A0A498LMK6		PDCL3	A0A498MDM7		prdx4	A0A498L8V5		nefl	A0A498MI91		dhtkd1	A0A498MTD0		sept10	A0A498MAY9		ctnnd2	A0A498LE92		hm13	A0A498LEV3		bub3	A0A498LL89		NAPSA	A0A498NLQ0		polr2b	A0A498NA51		fscn1	A0A498LAK0		mars	A0A498NF02		ide	A0A498LTM7		clic1	A0A498MCJ8
znf330	A0A498LML4		pdia3	A0A498MDR7		rtcb	A0A498N2H4		ahcyl1	A0A498N8Y0		srp68	A0A498ME85		prkacb	A0A498NE56		igf2bp1	A0A498MU51		snx5	A0A498LQ72		sec23ip	A0A498P0P1		pc	A0A498NTR3		psmb6	A0A498LJQ3		ehd3	A0A498LKP9		papss2	A0A498NFB2		srsf3	A0A498MV30		ppif	A0A498LM82
rangrf	A0A498LMN3		palld	A0A498MDT9		aldh18a1	A0A498LMW6		uggt1	A0A498NGH7		scfd1	A0A498MN03		umps	A0A498N4V9		igf2bp3	A0A498NAX1		hdlbp	A0A498LCI4		rpl31	A0A498MC52		SUCLA2	A0A498NNW1		ptbp3	A0A498MJ90		fscn2	A0A498MVZ0		mvd	A0A498MM36		mvd	A0A498MM36		gyg1	A0A498LU11
bsdc1	A0A498LMQ1		mlec	A0A498MDW3		ogt	A0A498MSU8		snx3	A0A498LKX7		aldh4a1	A0A498LXF0		ssbp1	A0A498MN52		kpna4	A0A498M1B8		ephx2	A0A498NP55		cops2	A0A498N4G1		cfl2	A0A498MQK3		ptbp1	A0A498LJP8		npepps	A0A498L5J2		gmfb	A0A498LA25		gmfb	A0A498LA25		pin1	A0A498NLG8
dusp3	A0A498LMQ2		cdc37	A0A498MDY1		hibadh	A0A498NNB9		cpt2	A0A498NR22		hadhb	A0A498NK83		nit2	A0A498LLS5		kpna3	A0A498NKE3		uggt1	A0A498NGH7		rars	A0A498LTZ7		RAB37	A0A498LTK1		ppp2r4	A0A498LRM8		inpp5d	A0A498L8Q0		snap91	A0A498NIL3		snap91	A0A498NIL3		slc25a20	A0A498MA61
NRXN3	A0A498LMQ8		grpel1	A0A498MDZ5		api5	A0A498MBP6		txlna	A0A498LYA1		gcdh	A0A498NNP0		ahnak	A0A498NTE8		map4k4	A0A498MQ09		ap1g1	A0A498NJ31		GBF1	A0A498N847		rab27b	A0A498N7M2		polr2c	A0A498MLT3		NAPSA	A0A498NLQ0		ctnna2	A0A498MTB9		lmo7	A0A498MEA4		cog2	A0A498N102
cdh2	A0A498LWB5		BCKDHB	A0A498ME07		rbms2	A0A498NJG1		fabp7	A0A498LTJ0		SLC25A22	A0A498LZI8		setd1a	A0A498NPK0		mink1	A0A498N4C9		pcca	A0A498L3R2		usp9x	A0A498N7E8		rab30	A0A498MYA6		usp9x	A0A498N5X4		pc	A0A498NTR3		yars	A0A498N049		snd1	A0A498MKL8		pdcd6ip	A0A498NAQ7
MYO1D	A0A498LMR6		dnaja2	A0A498ME23		psma2	A0A498MW39		rpl28	A0A498NGN3		STARD10	A0A498MIP6		npepps	A0A498L5J2		gys1	A0A498LZL8		pdia5	A0A498NHN2		cops5	A0A498MZ60		rab27a	A0A498NT07		cyfip2	A0A498LPC1		SUCLA2	A0A498NNW1		bub3	A0A498LL89		mta2	A0A498LCW4		capn11	A0A498LZE6
man1a1	A0A498M551		ist1	A0A498ME94		crkl	A0A498N553		vamp1	A0A498LKF6		rtn3	A0A498LGC7		uba5	A0A498NDZ0		gys2	A0A498MD49		hadhb	A0A498NK83		ap1m2	A0A498NL71		rab4a	A0A498MY60		isoc1	A0A498M060		cfl2	A0A498MQK3		LMTK3	A0A498NJ80		bub3	A0A498LL89		padi2	A0A498LR20
man1c1	A0A498M6B8		psmc2	A0A498MEA3		crk	A0A498LHE2		rpl21	A0A498NSE5		rtn1	A0A498M998		mut	A0A498N3E3		SLC25A10	A0A498M8Q5		acox1	A0A498M7H7		top2b	A0A498LY18		rab3c	A0A498NR85		ehd3	A0A498LKP9		RAB37	A0A498LTK1		rpl31	A0A498MC52		rpl31	A0A498MC52		scarb2	A0A498M7K2
vrk1	A0A498LMR7		lmo7	A0A498MEA4		fam32a	A0A498MUZ0		gpd1l	A0A498LFE6		ssbp1	A0A498MN52		RRM1	A0A498LIA0		polr2e	A0A498NNF7		SLC25A22	A0A498LZI8		rnf2	A0A498MDT8		rab3b	A0A498LLB3		dhx8	A0A498LPF1		rab27b	A0A498N7M2		cops2	A0A498N4G1		rars	A0A498LTZ7		dpp3	A0A498N600
entpd1	A0A498LMR9		MAP1A	A0A498MEJ1		dcaf7	A0A498NN52		scfd1	A0A498MN03		erc1	A0A498MPE0		dctn4	A0A498LYU8		mpp2	A0A498N429		tmed9	A0A498NTD8		alkbh4	A0A498MMB3		rab3d	A0A498NQ75		iba57	A0A498NDW3		rab30	A0A498MYA6		rars	A0A498LTZ7		usp9x	A0A498N7E8		ddx1	A0A498LFM1
itga9	A0A498LMS0		synm	A0A498MEK4		bpnt1	A0A498N514		prkar1a	A0A498N2L8		erc2	A0A498MRQ2		myof	A0A498N3A5		gpd1l	A0A498LFE6		tmed4	A0A498LFE7		mcm7	A0A498MPF1		rab9a	A0A498NNX0		pc	A0A498NTR3		rab27a	A0A498NT07		usp9x	A0A498N7E8		cops5	A0A498MZ60		dnm1l	A0A498P3I9
polr2a	A0A498LS48		flnc	A0A498MEP5		clic4	A0A498NCC7		glo1	A0A498LP57		adck3	A0A498LD68		DHX35	A0A498MG05		myl10	A0A498N5U9		endog	A0A498LVA4		pds5a	A0A498N1E0		rab4b	A0A498M0T0		SUCLA2	A0A498NNW1		rab4a	A0A498MY60		ap1m2	A0A498NL71		ap1m2	A0A498NL71		slc23a3	A0A498N5F3
irf2bp2	A0A498LMT9		gdi2	A0A498MEQ4		prrc1	A0A498M377		ak3	A0A498MXG2		rnf103	A0A498MV71		klc1	A0A498MWF4		scgn	A0A498N7U2		rps10	A0A498LD02		abr	A0A498MTF1		rab12	A0A498MTM6		cfl2	A0A498MQK3		rab3c	A0A498NR85		uggt1	A0A498NGH7		elavl3	A0A498MPM9		aifm1	A0A498NF81
samm50	A0A498LMW5		calu	A0A498MEU8		prkce	A0A498LSA7		ak1	A0A498LXQ7		picalm	A0A498LLQ2		efhd1	A0A498L9R3		tmem30a	A0A498M1P6		ndufs8	A0A498MMX0		bcr	A0A498NKW6		thoc6	A0A498NPP4		RAB37	A0A498LTK1		rab3b	A0A498LLB3		top2b	A0A498LY18		elavl4	A0A498NS54		crat	A0A498MJ07
gpam	A0A498LMX6		myh9	A0A498MEV5		prkcq	A0A498LHZ9		bckdha	A0A498LC60		snap91	A0A498NIL3		efhd2	A0A498LP25		itgav	A0A498N1H6		MTFP1	A0A498LWV6		prdx2	A0A498LM50		rab39b	A0A498LGI2		rab27b	A0A498N7M2		rab3d	A0A498NQ75		pgm3	A0A498N0K6		elavl2	A0A498NML0		nae1	A0A498LY63
ECHDC3	A0A498LMZ0		EIF5A	A0A498MEW8		trip12	A0A498MF43		ssr3	A0A498MN87		pcca	A0A498L3R2		mvp	A0A498LX76		ampd1	A0A498LYA9		mccc1	A0A498MVF3		grpel1	A0A498MDZ5		ddx4	A0A498LUH2		rab4a	A0A498MY60		thoc6	A0A498NPP4		prdx2	A0A498LM50		hbs1l	A0A498MLX6		ndrg2	A0A498LFM0
tmem50a	A0A498LMZ1		ndufb10	A0A498MEZ8		psme2	A0A498NMM5		MRPL2	A0A498MKV1		fdxr	A0A498LLL7		amylase	A0A498N5K0		FBN3	A0A498MW06		lrpprc	A0A498N968		mta2	A0A498LCW4		rpn1	A0A498NHG3		rab3c	A0A498NR85		rab39b	A0A498LGI2		iars2	A0A498N5U1		alkbh4	A0A498MMB3		cops3	A0A498N2D1
ppp2r2d	A0A498LGJ5		snrnp200	A0A498MF00		polr2h	A0A498MUI6		arl8a	A0A498LJJ3		ufd1l	A0A498LLT9		ist1	A0A498ME94		kctd8	A0A498N8G3		adck3	A0A498LD68		ctnna2	A0A498MTB9		acadm	A0A498LBY9		rab30	A0A498MYA6		rab9a	A0A498NNX0		gnpda2	A0A498NET5		mettl3	A0A498MQ49		idh3g	A0A498MYZ3
vapa	A0A498L1U6		plgrkt	A0A498MFA2		rpl18a	A0A498LIH2		stt3a	A0A498MJ33		faf2	A0A498NEQ6		ero1l	A0A498LKD0		col12a1	A0A498M2L1		tmlhe	A0A498NC20		igf2bp1	A0A498MU51		csnk2a2	A0A498MCY8		rab27a	A0A498NT07		rab4b	A0A498M0T0		dnm1	A0A498N471		prdx2	A0A498LM50		crk	A0A498LHE2
RAB31	A0A498LEZ9		myh7b	A0A498MFA4		acadvl	A0A498MKU0		tcea1	A0A498LFL4		mut	A0A498N3E3		thbs4	A0A498MP89		unc119b	A0A498M894		ergic1	A0A498MW07		drg2	A0A498M5H6		gsr	A0A498N4Q6		rab3b	A0A498LLB3		rab12	A0A498MTM6		dnm2	A0A498M3Y7		nup107	A0A498LTM5		cryl1	A0A498MAL2
vapb	A0A498LN48		abcc9	A0A498MFD9		g6pd	A0A498NGC9		atp2b4	A0A498LE85		btf3l4	A0A498NJ63		MAT1A	A0A498MSY9		lamb2	A0A498L2K9		emc3	A0A498L630		impdh2	A0A498NDI4		dsp	A0A498M167		rab3d	A0A498NQ75		tpr	A0A498LDV6		hspb1	A0A498NLH3		gmps	A0A498LQI3		uchl5	A0A498MAE5
TTC39B	A0A498LN49		clta	A0A498MFE1		iqgap1	A0A498MM11		atp2b2	A0A498NJB6		gnaq	A0A498MB94		sept6	A0A498LGV3		atp6v1h	A0A498MJS7		kiaa0368	A0A498N963		uap1l1	A0A498LPN6		mapk14	A0A498NV34		rab9a	A0A498NNX0		rpn1	A0A498NHG3		aqr	A0A498NAG9		hspb1	A0A498NLH3		adprh	A0A498MGA3
uso1	A0A498NFH4		akt2	A0A498MFH8		rusc1	A0A498M085		COQ7	A0A498L9L3		GNAZ	A0A498MXC9		hadhb	A0A498NK83		mcu	A0A498N0B1		ugt1a1	A0A498NDU4		eif4h	A0A498M1G8		papss2	A0A498NFB2		rab4b	A0A498M0T0		acadm	A0A498LBY9		npepps	A0A498L5J2		dnm1	A0A498N471		tat	A0A498MY15
g3bp1	A0A498NTC7		hagh	A0A498MFI3		nit2	A0A498LLS5		col12a1	A0A498M2L1		farsa	A0A498NUW6		PRIM2	A0A498N7X6		mapkapk2	A0A498MRD8		ufd1l	A0A498LLT9		ppid	A0A498LWH4		papss1	A0A498LNF8		rab12	A0A498MTM6		csnk2a2	A0A498MCY8		mta2	A0A498LCW4		grpel1	A0A498MDZ5		dyrk4	A0A498MTT4
lamb2	A0A498L2K9		psmc1	A0A498MFP7		nsun2	A0A498MNR7		cyfip2	A0A498LTV0		akap10	A0A498MS40		serpinb1	A0A498NBE7		rpl13	A0A498NJ12		atp5j2	A0A498M8D4		srsf2	A0A498LSM2		exoc1	A0A498N1G4		thoc6	A0A498NPP4		gsr	A0A498N4Q6		asns	A0A498M0X4		ctnna2	A0A498MTB9		vdac3	A0A498NI22
lama2	A0A498LL75		lancl1	A0A498MFQ8		p4hb	A0A498M105		tub	A0A498MYE8		pi4k2a	A0A498LLY9		serpinc1	A0A498MH64		UNC13C	A0A498NTC3		mpc2	A0A498NAY0		gmpr2	A0A498MKE8		nfic	A0A498NRG7		rab39b	A0A498LGI2		dsp	A0A498M167		smc1a	A0A498LVV3		asns	A0A498M0X4		hnrnpa0	A0A498N148
tmem214	A0A498LN85		tsnaxip1	A0A498MFR0		glod4	A0A498L6A7		rras	A0A498NPH6		pah	A0A498M9N5		dnm1	A0A498N471		FAM49B	A0A498N1Q0		CYTB	V5XVB7		hadha	A0A498LIF2		evl	A0A498P4J4		rpn1	A0A498NHG3		kpna3	A0A498NKE3		igf2bp1	A0A498MU51		drap1	A0A498NF34		anp32e	A0A498N3E4
mmp2	A0A498MP00		NLRC5	A0A498MFX3		C14orf166	A0A498LP40		rbm27	A0A498N3F5		rgn	A0A498NNC6		suclg2	A0A498MPS1		slc9b2	A0A498ML40		acaca	A0A498M9R9		mcm2	A0A498NLN5		sept10	A0A498MAY9		acadm	A0A498LBY9		urod	A0A498LJC4		impdh2	A0A498NDI4		impdh2	A0A498NDI4		anxa4	A0A498M537
SPIDR	A0A498MSK4		abhd10	A0A498MFZ3		FAM49B	A0A498N1Q0		rfc1	A0A498N0B2		ak2	A0A498LIT6		atp2b4	A0A498LE85		htra1	A0A498NSH0		gsr	A0A498N4Q6		eif3m	A0A498NED7		urod	A0A498LJC4		csnk2a2	A0A498MCY8		ahnak	A0A498NTE8		ppid	A0A498LWH4		uap1l1	A0A498LPN6		tollip	A0A498MVA6
msh2	A0A498LN88		praf2	A0A498MFZ8		osbp2	A0A498MJU4		mars	A0A498NF02		cmpk1	A0A498N071		atp2b2	A0A498NJB6		HTRA2	A0A498MYC4		faf2	A0A498NEQ6		polr2b	A0A498NA51		dld	A0A498LAH2		gsr	A0A498N4Q6		tardbp	A0A498LTK5		srsf2	A0A498LSM2		srsf2	A0A498LSM2		C5orf51	A0A498MMK1
acsf2	A0A498LNB8		sspn	A0A498MG06		osbp	A0A498LL08		trip11	A0A498LYY9		pter	A0A498NZP2		echs1	A0A498MUH8		fscn1	A0A498LAK0		CDC42BPA	A0A498LDK7		psmb6	A0A498LJQ3		egfr	A0A498P0K6		dsp	A0A498M167		setd1a	A0A498NPK0		hadha	A0A498LIF2		msh6	A0A498LP98		cops7a	A0A498LG70
cnn1	A0A498LNC0		rpl4	A0A498MG21		drg1	A0A498NSN9		ada	A0A498MY71		pebp1	A0A498NG47		oxct1	A0A498MG85		usp14	A0A498N6B6		rock2	A0A498LQC0		ptbp3	A0A498MJ90		tubg1	A0A498MG41		mapk14	A0A498NV34		mut	A0A498N3E3		snrpb	A0A498NF52		flii	A0A498LDS4		sirt5	A0A498LB15
cnn3	A0A498N571		PRDX6	A0A498MG46		ap3m1	A0A498NZ89		itpr1	A0A498NQL6		NLRC5	A0A498MFX3		aldh6a1	A0A498M1U7		nhp2l1	A0A498MA66		nckap1	A0A498N459		gsk3b	A0A498MAP7		nit2	A0A498LLS5		nfic	A0A498NRG7		myof	A0A498N3A5		eif3m	A0A498NED7		pcmt1	A0A498MN94		mcu	A0A498N0B1
cnn2	A0A498P452		ppp1r11	A0A498MG98		ap3m2	A0A498NGD5		kpna3	A0A498NKE3		cpne4	A0A498N0M0		acadl	A0A498N4S4		ndufa6	A0A498MHB9		mut	A0A498N3E3		ppp2r4	A0A498LRM8		ahnak	A0A498NTE8		epha4	A0A498L7Y2		dnaja2	A0A498ME23		psmb6	A0A498LJQ3		hadha	A0A498LIF2		anxa10	A0A498MXP6
iyd	A0A498LNC6		sorbs3	A0A498MGG0		osgep	A0A498N1Z5		snrnp70	A0A498NMP8		CPNE7	A0A498NJ35		ldhd	A0A498MUN0		npepl1	A0A498MZQ6		B4GALT1	A0A498N8B1		polr2c	A0A498MLT3		tardbp	A0A498LTK5		ephb3	A0A498L7L7		efhd1	A0A498L9R3		ptbp3	A0A498MJ90		srp68	A0A498ME85		gstm3	A0A498LT46
cnrip1	A0A498LNC9		atp5d	A0A498MGL5		picalm	A0A498LLQ2		pds5a	A0A498N1E0		csrp2	A0A498NZS0		sar1b	A0A498LDZ5		rdh12	A0A498LUW8		gnaq	A0A498MB94		cyfip2	A0A498LPC1		setd1a	A0A498NPK0		ephb2	A0A498N6Z2		efhd2	A0A498LP25		rcc1	A0A498L913		psmb6	A0A498LJQ3		isoc1	A0A498M060
psen2	A0A498LND9		gpx4	A0A498MGM1		ranbp3	A0A498N0B4		mcm7	A0A498MPF1		prpf6	A0A498NW67		ivd	A0A498MHV3		nudt2	A0A498M1G4		clint1	A0A498LHC0		isoc1	A0A498M060		dlg4	A0A498LP01		urod	A0A498LJC4		mvp	A0A498LX76		ehd3	A0A498LKP9		ptbp3	A0A498MJ90		auh	A0A498LUF6
pdcd11	A0A498LNG6		nans	A0A498MGP0		uso1	A0A498NFH4		tmed9	A0A498NTD8		ctnnbl1	A0A498NQE6		sord	A0A498L7C3		sirt5	A0A498LB15		akap10	A0A498MS40		fscn1	A0A498LAK0		arvcf	A0A498NK53		best2	A0A498LUM0		snx12	A0A498LH99		u2af1	A0A498LY45		ppp2r4	A0A498LRM8		ndufv2	A0A498N051
glt8d1	A0A498LNH2		crmp1	A0A498MGP7		appl1	A0A498LQ34		ppm1a	A0A498MCG3		ptpn11	A0A498NBW8		ehd3	A0A498LKP9		SEPT12	A0A498N0P4		pi4k2a	A0A498LLY9		ehd3	A0A498LKP9		dctn4	A0A498LYU8		atp6v1d	A0A498NK38		mapk14	A0A498NV34		ppp2r4	A0A498LRM8		polr2c	A0A498MLT3		psmb3	A0A498MYG1
h6pd	A0A498LNH7		fstl1	A0A498MGU5		sept2	A0A498MAB6		slc3a1	A0A498N651		chd4	A0A498NJC5		hsd17b4	A0A498NEL9		hkdc1	A0A498N424		pah	A0A498M9N5		dhx8	A0A498LPF1		myof	A0A498N3A5		ahnak	A0A498NTE8		myo1c	A0A498LHU8		wdr61	A0A498LAT7		cyfip2	A0A498LPC1		atp5o	A0A498NAQ8
g6pd	A0A498NGC9		tprkb	A0A498MGY9		ruvbl1	A0A498L6Q9		pin4	A0A498NU90		pip4k2a	A0A498L6U4		HNRNPH3	A0A498NDF4		arhgap35	A0A498LZX9		ftcd	A0A498LNN9		dnajc7	A0A498M6L9		efhd1	A0A498L9R3		tardbp	A0A498LTK5		nfyc	A0A498MZI8		fscn1	A0A498LAK0		isoc1	A0A498M060		atp5f1	A0A498NAE3
ggps1	A0A498LNH9		trappc3	A0A498MH32		srm	A0A498LY23		st13	A0A498NMR0		akt1	A0A498NSQ3		snx12	A0A498LH99		dctn4	A0A498LYU8		rgn	A0A498NNC6		pc	A0A498NTR3		efhd2	A0A498LP25		setd1a	A0A498NPK0		pcca	A0A498L3R2		inpp5d	A0A498L8Q0		arih2	A0A498LST9		hmgb2	A0A498LD75
C2orf76	A0A498LNI4		serpinc1	A0A498MH64		rpl35	A0A498MJY6		TPP2	A0A498M7L0		akt3	A0A498LUS8		crmp1	A0A498MGP7		kiaa0196	A0A498MGE1		cmpk1	A0A498N071		SUCLA2	A0A498NNW1		snx12	A0A498LH99		dlg4	A0A498LP01		ak3	A0A498MXG2		NAPSA	A0A498NLQ0		fscn2	A0A498MVZ0		gpx1	A0A498NS09
atrnl1	A0A498LNI8		sod3	A0A498MH86		cspg5	A0A498NKU3		gfpt2	A0A498LPI3		crybb2	A0A498P1P5		slc38a7	A0A498MQJ7		camk4	A0A498M9Q6		DDB1	A0A498LQ23		cfl2	A0A498MQK3		ptpra	A0A498NKD0		mut	A0A498N3E3		nefl	A0A498N5J2		pc	A0A498NTR3		dnajc7	A0A498M6L9		mrpl24	A0A498M3K3
cpn1	A0A498LNK8		KIF25	A0A498MHB2		aldh1a2	A0A498L6Y8		nnt	A0A498N8P1		dhrs13	A0A498LHI3		OGDHL	A0A498MQY5		git1	A0A498LQL3		qars	A0A498LZ02		RAB37	A0A498LTK1		nefl	A0A498N5J2		arvcf	A0A498NK53		amylase	A0A498N5K0		SUCLA2	A0A498NNW1		epb41	A0A498NQS7		tpt1	A0A498L311
chad	A0A498LNL3		ctsb	A0A498MHB7		lars	A0A498N4V8		hoga1	A0A498MAV9		atp6v1c1	A0A498N769		myl6	A0A498LTG0		TTN	A0A498NZ39		pter	A0A498NZP2		rab27b	A0A498N7M2		amylase	A0A498N5K0		dnaja2	A0A498ME23		ero1l	A0A498LKD0		hmgcr	A0A498MNL2		NAPSA	A0A498NLQ0		cmpk1	A0A498N071
chmp2a	A0A498LNM5		ndufa6	A0A498MHB9		kiaa0196	A0A498MGE1		gys1	A0A498LZL8		RAP1GDS1	A0A498NIT8		adsl	A0A498MZR2		nfyc	A0A498MZI8		CPNE7	A0A498NJ35		rab30	A0A498MYA6		ero1l	A0A498LKD0		efhd1	A0A498L9R3		trappc3	A0A498MH32		cfl2	A0A498MQK3		iba57	A0A498NDW3		atp5h	A0A498LBS5
C7orf25	A0A498LNR8		aldh1a3	A0A498MHF6		btf3l4	A0A498NJ63		gys2	A0A498MD49		gpm6a	A0A498LGQ1		tollip	A0A498MVA6		cnrip1	A0A498LNC9		CPNE4	A0A498NKD7		rab27a	A0A498NT07		trappc3	A0A498MH32		efhd2	A0A498LP25		thbs4	A0A498MP89		RAB37	A0A498LTK1		hmgb2	A0A498LD75		ndufb10	A0A498MEZ8
upp2	A0A498LNV1		AGO1	A0A498MHI7		dnm1	A0A498N471		hm13	A0A498LEV3		RPS6KA2	A0A498N7E2		fabp3	A0A498MWH4		sesn2	A0A498N280		NLRC5	A0A498MFX3		rab4a	A0A498MY60		thbs4	A0A498MP89		mvp	A0A498LX76		snap25	A0A498LLP4		rab27b	A0A498N7M2		pc	A0A498NTR3		FTHL17	A0A498M9Z8
fmr1	A0A498LNV6		psmg1	A0A498MHM4		mark2	A0A498MQB9		snx5	A0A498LQ72		ampd1	A0A498LYA9		pmp2	A0A498MRU3		nprl3	A0A498NFT9		ostf1	A0A498MRW3		rab3c	A0A498NR85		stk38	A0A498LP65		cab39l	A0A498NJV9		hadhb	A0A498NK83		rab30	A0A498MYA6		SUCLA2	A0A498NNW1		cnbp	A0A498NJ76
fxr2	A0A498MYT5		upb1	A0A498MHN3		ABCF3	A0A498NA79		hdlbp	A0A498LCI4		sh3glb1	A0A498M723		actr3b	A0A498NRS4		gabra6	A0A498NEI2		cops5	A0A498MZ60		rab3b	A0A498LLB3		stk38l	A0A498MER8		gys1	A0A498LZL8		serpinc1	A0A498MH64		rab27a	A0A498NT07		cfl2	A0A498MQK3		rpl18a	A0A498LIH2
fxr1	A0A498P5C7		pak2	A0A498MHP4		dr1	A0A498M116		ephx2	A0A498NP55		srl	A0A498MXC3		aldh1a3	A0A498MHF6		gabrb2	A0A498NU18		cab39l	A0A498NJV9		rab3d	A0A498NQ75		arf6	A0A498NTC1		myo1c	A0A498LHU8		serpinb1	A0A498NC80		rab4a	A0A498MY60		RAB37	A0A498LTK1		rtn4	A0A498N4P6
fasn	A0A498LNV7		hddc3	A0A498MHR4		pfkfb2	A0A498LRR2		sec23b	A0A498N4Q4		folh1b	A0A498MU97		aldh9a1	A0A498NRW6		myom2	A0A498N3K3		prpf8	A0A498LH59		thoc6	A0A498NPP4		hadhb	A0A498NK83		nfyc	A0A498MZI8		cask	A0A498NDR7		rab3c	A0A498NR85		rab27b	A0A498N7M2		b4gat1	A0A498MPM1
lhpp	A0A498LNX9		gcfc2	A0A498MHT5		uroc1	A0A498LEI0		pcca	A0A498L3R2		pde6b	A0A498NC64		aldh3b1	A0A498N2C4		mri1	A0A498N520		hgs	A0A498L6D4		rab39b	A0A498LGI2		hnrnpa0	A0A498N1Y3		pcca	A0A498L3R2		dnm1	A0A498N471		rab3b	A0A498LLB3		rab4a	A0A498MY60		rpl32	A0A498MLZ6
arl3	A0A498MW00		ivd	A0A498MHV3		RABGAP1L	A0A498ML12		hadhb	A0A498NK83		neb	A0A498N3Y5		aldh1a2	A0A498L6Y8		acsl1	A0A498LDW3		slc16a9	A0A498LQI4		rab9a	A0A498NNX0		serpinc1	A0A498MH64		ak3	A0A498MXG2		suclg2	A0A498MPS1		rab3d	A0A498NQ75		rab3c	A0A498NR85		prdx5	A0A498NCD5
trappc9	A0A498LP02		hyi	A0A498MHW3		ehd3	A0A498LKP9		samm50	A0A498LMW5		hmgb2	A0A498LD75		CAMK1	A0A498LF47		nid2	A0A498LTT6		gmps	A0A498LQI3		rab4b	A0A498M0T0		serpinb1	A0A498NC80		nefl	A0A498N5J2		OPLAH	A0A498NLG1		rab9a	A0A498NNX0		rab30	A0A498MYA6		cotl1	A0A498N767
emc8	A0A498LP04		gart	A0A498MHY3		ube2m	A0A498MC44		acadsb	A0A498LMG7		cpe	A0A498L8V7		adh5	A0A498MXR4		cbr1	A0A498NJN0		nck2	A0A498M8A4		rab12	A0A498MTM6		stat3	A0A498LWF7		amylase	A0A498N5K0		atp2b4	A0A498LE85		rab4b	A0A498M0T0		rab27a	A0A498NT07		C11orf65	A0A498N5G5
acaa1	A0A498LP08		actn3	A0A498MHZ7		sugt1	A0A498NED4		acaa1	A0A498LP08		esyt1	A0A498P1N8		lancl2	A0A498LF21		prkca	A0A498MTD2		nck1	A0A498M3P0		rpn1	A0A498NHG3		suclg2	A0A498MPS1		trappc3	A0A498MH32		atp2b2	A0A498NJB6		rab12	A0A498MTM6		rab3b	A0A498LLB3		crabp1	A0A498LAL7
gng4	A0A498LP18		C4orf33	A0A498MI09		syt1	A0A498LTH2		acox1	A0A498M7H7		xrcc5	A0A498MC33		nefl	A0A498MI91		clvs2	A0A498LSN1		map1lc3b	A0A498LYC4		acadm	A0A498LBY9		OPLAH	A0A498NLG1		thbs4	A0A498MP89		echs1	A0A498MUH8		thoc6	A0A498NPP4		aire	A0A498LNQ2		pfn2	A0A498LY02
efhd1	A0A498L9R3		dhx9	A0A498MI27		skiv2l2	A0A498MEF2		SLC25A10	A0A498M8Q5		ptprc	A0A498NTG3		hspa4	A0A498NTF6		hapln1	A0A498NQ29		rtca	A0A498MM56		csnk2a2	A0A498MCY8		ptp4a2	A0A498MVK7		iqsec2	A0A498MLH6		hmgcl	A0A498NCN4		rab39b	A0A498LGI2		rab3d	A0A498NQ75		txndc17	A0A498LEU3
efhd2	A0A498LP25		ndufb7	A0A498MI42		capns1	A0A498LHL4		RMDN1	A0A498MCU4		erh	A0A498LGY3		snx3	A0A498LKX7		hapln3	A0A498MJW1		csnk1a1	A0A498NCK2		gsr	A0A498N4Q6		atp2b4	A0A498LE85		hadhb	A0A498NK83		aldh6a1	A0A498M1U7		tnnc2	A0A498N0H1		thoc6	A0A498NPP4		acot13	A0A498MLJ8
C14orf166	A0A498LP40		nefl	A0A498MI91		aqr	A0A498NAG9		tmed4	A0A498LFE7		ist1	A0A498ME94		cpt2	A0A498NR22		cacna2d1	A0A498NXN0		crybb2	A0A498P1P5		dsp	A0A498M167		atp2b2	A0A498NJB6		syt1	A0A498LTH2		gpx1	A0A498L6S7		rpn1	A0A498NHG3		rab39b	A0A498LGI2		nhp2l1	A0A498NAK3
ntpcr	A0A498LP47		sh3kbp1	A0A498MIB9		eif3e	A0A498LFI9		manf	A0A498MIU3		mat2b	A0A498LGG2		rab18	A0A498LVL4		sdcbp	A0A498LUF9		atp2b2	A0A498NJB6		mapk14	A0A498NV34		echs1	A0A498MUH8		rps6ka3	A0A498MVB5		acmsd	A0A498N8L8		acadm	A0A498LBY9		rab9a	A0A498NNX0		SH3BGRL	A0A498LJ34
slc22a6	A0A498LP54		atp6v0d1	A0A498MIE0		EIF3L	A0A498N9L1		naa50	A0A498NT28		evl	A0A498P4J4		txlna	A0A498LYA1		trim2	A0A498LLZ0		atp2b4	A0A498LE85		papss2	A0A498NFB2		aco1	A0A498MTB1		serpinb1	A0A498NBE7		glrx3	A0A498LFT5		gsr	A0A498N4Q6		rab4b	A0A498M0T0		mif	A0A498LWI4
glo1	A0A498LP57		nat1	A0A498MIF6		ddx23	A0A498NGG1		rps10	A0A498LD02		vasp	A0A498MD67		fabp7	A0A498LTJ0		polr2a	A0A498LS48		jakmip2	A0A498N6P6		naa50	A0A498NT28		oxct1	A0A498MG85		serpinc1	A0A498MH64		dmgdh	A0A498MPE4		fam20b	A0A498MCH0		rab12	A0A498MTM6		C19orf70	A0A498NH70
scrn3	A0A498LP59		mfge8	A0A498MIM8		ube2v1	A0A498LTN4		chp1	A0A498LVS8		tnnc2	A0A498N0H1		rpl28	A0A498NGN3		myh7b	A0A498MFA4		dlg3	A0A498LL25		best2	A0A498LUM0		hmgcl	A0A498NCN4		suclg2	A0A498MPS1		acadl	A0A498N4S4		dsp	A0A498M167		polr3b	A0A498MG09		col6a1	A0A498NRY6
unk	A0A498LP62		erap2	A0A498MIP9		wdr61	A0A498LAT7		ndufa7	A0A498LW32		ELOA	A0A498MX46		timm44	A0A498MVI3		pdk4	A0A498N255		myo6	A0A498MBZ1		atp6v1d	A0A498NK38		aldh6a1	A0A498M1U7		OPLAH	A0A498NLG1		ldhd	A0A498MUN0		spg7	A0A498LRG0		rpn1	A0A498NHG3		COX2	H9C4W7
dync1i2	A0A498LP67		sec23a	A0A498MIT6		sh3glb2	A0A498LRN4		znf592	A0A498LAI4		stk38	A0A498LP65		rpl21	A0A498NSE5		arhgdia	A0A498LI33		elavl4	A0A498NS54		prkacb	A0A498NE56		acadl	A0A498N4S4		echs1	A0A498MUH8		grpel1	A0A498MDZ5		naa50	A0A498NT28		acadm	A0A498LBY9		tf	A0A498N853
neto1	A0A498LP79		manf	A0A498MIU3		fh	A0A498LTT9		MTFP1	A0A498LWV6		stat3	A0A498LWF7		ykt6	A0A498N3I9		anxa1	A0A498NJQ3		best2	A0A498LUM0		ssbp1	A0A498MN52		ldhd	A0A498MUN0		aco1	A0A498MTB1		sar1b	A0A498LDZ5		kpna3	A0A498NKE3		csnk2a2	A0A498MCY8		dlg5	A0A498LL74
galc	A0A498LP83		mgst1	A0A498MIW9		hspa4	A0A498NTF6		lrpprc	A0A498N968		CNDP1	A0A498LAC0		map1lc3a	A0A498MSG3		txlna	A0A498LYA1		xrcc5	A0A498MC33		ahnak	A0A498NTE8		sar1b	A0A498LDZ5		aldh6a1	A0A498M1U7		ivd	A0A498MHV3		urod	A0A498LJC4		gsr	A0A498N4Q6		glrx3	A0A498LFT5
elovl6	A0A498LP89		RASGRF1	A0A498MIZ1		psmb3	A0A498MYG1		adck3	A0A498LD68		EIF3C	A0A498MRL6		gpd1l	A0A498LFE6		gnb5	A0A498M0B2		mat2b	A0A498LGG2		tardbp	A0A498LTK5		ivd	A0A498MHV3		acadl	A0A498N4S4		sardh	A0A498MXH8		atp6v1d	A0A498NK38		dsp	A0A498M167		prx	A0A498NNA6
msh6	A0A498LP98		psmc3	A0A498MJ03		xpo7	A0A498MMK2		ergic1	A0A498MW07		chmp2a	A0A498LNM5		scfd1	A0A498MN03		sh3pxd2b	A0A498NCE2		efhd1	A0A498L9R3		setd1a	A0A498NPK0		sardh	A0A498MXH8		ldhd	A0A498MUN0		hsd17b4	A0A498NEL9		egfr	A0A498P0K6		msh2	A0A498LN88		hspg2	A0A498LVR7
cyfip2	A0A498LPC1		stoml2	A0A498MJ13		etfdh	A0A498LWE7		emc3	A0A498L630		cpt2	A0A498NR22		parp1	A0A498LGP1		dip2a	A0A498LHS4		adh5	A0A498MXR4		dlg4	A0A498LP01		HPCAL1	A0A498LDM3		sar1b	A0A498LDZ5		snx3	A0A498LKX7		ahnak	A0A498NTE8		naa50	A0A498NT28		dcn	A0A498M9M2
cyfip1	A0A498LRL9		cand1	A0A498MJ18		pls3	A0A498MZT6		ugt1a1	A0A498NDU4		tfg	A0A498NEM1		polr2a	A0A498LS48		pvalb	A0A498LE30		adam10	A0A498LCA1		dctn4	A0A498LYU8		ncald	A0A498LGU7		ivd	A0A498MHV3		HNRNPH3	A0A498NDF4		tardbp	A0A498LTK5		atp6v1d	A0A498NK38		aars	A0A498MDH5
rpl7a	A0A498LPH1		smtn	A0A498MJ23		lcp1	A0A498MAX9		fdxr	A0A498LLL7		cttn	A0A498LTW8		bckdha	A0A498LC60		pde1a	A0A498N0M8		ELOA	A0A498MX46		myof	A0A498N3A5		hsd17b4	A0A498NEL9		sord	A0A498L7C3		phyhipl	A0A498NAQ3		setd1a	A0A498NPK0		RRM1	A0A498LIA0		postn	A0A498LEZ7
copa	A0A498LPI1		stt3a	A0A498MJ33		atmin	A0A498LLW6		sumf2	A0A498MYL6		myo6	A0A498MBZ1		ssr3	A0A498MN87		snx30	A0A498M295		RPS6KA2	A0A498N7E2		ptpn11	A0A498NBW8		snx3	A0A498LKX7		hsd17b4	A0A498NEL9		crmp1	A0A498MGP7		uba5	A0A498NDZ0		umps	A0A498N4V9		tgfbi	A0A498NUS4
SIPA1	A0A498MZV5		csnk2b	A0A498MJ87		inpp5d	A0A498L8Q0		CYTB	V5XVB7		upf1	A0A498NMU3		MRPL2	A0A498MKV1		fam171a1	A0A498NCE6		AP3S1	A0A498NA52		dnaja2	A0A498ME23		HNRNPH3	A0A498NDF4		snx12	A0A498LH99		dpys	A0A498L4W1		dlg4	A0A498LP01		tmf1	A0A498MR76		klhl31	A0A498MZG5
GFPT1	A0A498LN13		myl4	A0A498MJ94		cpne3	A0A498N8C4		myo1c	A0A498LHU8		tmod3	A0A498N4C6		CEP192	A0A498LC83		gulp1	A0A498NHU0		CTBP2	A0A498LLX7		efhd1	A0A498L9R3		epn1	A0A498N5R3		snx3	A0A498LKX7		anxa10	A0A498MXP6		sec23ip	A0A498P0P1		eefsec	A0A498LDF0		klhl41	A0A498MUW0
gfpt2	A0A498LPI3		lrpap1	A0A498MJN9		polr2b	A0A498NA51		arf6	A0A498NTC1		dnaja2	A0A498ME23		srprb	A0A498M7U4		itih2	A0A498L9R8		dpyd	A0A498NE23		efhd2	A0A498LP25		crmp1	A0A498MGP7		msi1	A0A498LH33		PPP3CA	A0A498LYV6		ptpn11	A0A498NBW8		ahnak	A0A498NTE8		igf2bp1	A0A498MU51
fbxw2	A0A498LPI9		pygm	A0A498MJP2		top1	A0A498NK94		ppfibp1	A0A498LV52		PMM1	A0A498MHX8		magt1	A0A498N4G3		ITGB1BP2	A0A498MY33		stat3	A0A498LWF7		mvp	A0A498LX76		dpys	A0A498L4W1		epn1	A0A498N5R3		ppm1a	A0A498MCG3		efhd1	A0A498L9R3		setd1a	A0A498NPK0		igf2bp3	A0A498NAX1
asl	A0A498LPJ7		vbp1	A0A498MJQ0		add3	A0A498LDW5		uroc1	A0A498LEI0		PLEKHO2	A0A498ND87		tmem33	A0A498N5A5		snx8	A0A498M9Z7		stk10	A0A498N8G4		snx12	A0A498LH99		slc38a7	A0A498MQJ7		crmp1	A0A498MGP7		slc3a1	A0A498N651		efhd2	A0A498LP25		uba5	A0A498NDZ0		nap1l4	A0A498L642
surf1	A0A498LPK2		fblim1	A0A498MJQ7		gart	A0A498MHY3		gnaq	A0A498MB94		kif5c	A0A498N878		nup155	A0A498MMI4		xrcc6bp1	A0A498LJY8		gmppb	A0A498M3E5		tjp2	A0A498MYC9		calb2	A0A498MBC2		dpys	A0A498L4W1		slc38a7	A0A498MQJ7		mvp	A0A498LX76		mut	A0A498N3E3		dars	A0A498N790
nhlrc2	A0A498LPK8		tia1	A0A498MJQ9		igf2bp2	A0A498N8N6		rgn	A0A498NNC6		fubp3	A0A498MUZ4		tubgcp2	A0A498N421		pdlim1	A0A498NZA9		CALD1	A0A498MUT6		nfyc	A0A498MZI8		hspa12a	A0A498P302		PPP3CA	A0A498LYV6		OGDHL	A0A498MQY5		snx12	A0A498LH99		ankfy1	A0A498LYZ7		lum	A0A498ML95
nhp2	A0A498LPL2		atp6v1h	A0A498MJS7		zmpste24	A0A498NCP1		cmpk1	A0A498N071		gopc	A0A498LI52		COQ7	A0A498L9L3		pdk1	A0A498LGU8		cpt2	A0A498NR22		ist1	A0A498ME94		map1lc3a	A0A498MSG3		ppm1a	A0A498MCG3		hk1	A0A498N0I6		ak3	A0A498MXG2		dctn4	A0A498LYU8		pdia6	A0A498LDE8
rpl12	A0A498LPL3		ap1s1	A0A498MJV6		ubqln4	A0A498NQC9		qars	A0A498LZ02		dync1li2	A0A498LWA9		col12a1	A0A498M2L1		GCA	A0A498NPI3		cttn	A0A498LTW8		MAP3K15	A0A498M9V9		adsl	A0A498MZR2		slc3a1	A0A498N651		hspa12a	A0A498P302		nedd8	A0A498MPI0		dnaja2	A0A498ME23		wbscr17	A0A498L6I4
c2cd2l	A0A498LPM8		hapln3	A0A498MJW1		got1	A0A498LHI8		pter	A0A498NZP2		mapk14	A0A498NV34		KATNAL1	A0A498M7J9		gmps	A0A498LQI3		prkag1	A0A498LH41		trappc3	A0A498MH32		tollip	A0A498MVA6		slc38a7	A0A498MQJ7		map1lc3a	A0A498MSG3		amylase	A0A498N5K0		mvp	A0A498LX76		tmod4	A0A498NIP2
capn9	A0A498LPN1		tes	A0A498MJX4		ak2	A0A498LIT6		NLRC5	A0A498MFX3		mylk	A0A498LFS7		cyfip2	A0A498LPC1		clic2	A0A498LIJ7		plxnb2	A0A498LIG6		ATG7	A0A498NJK5		ubqln4	A0A498NQC9		snap25	A0A498LLP4		adsl	A0A498MZR2		trappc3	A0A498MH32		snx12	A0A498LH99		murc	A0A498NTA9
rpl34	A0A498LPR4		rpl35	A0A498MJY6		ptpra	A0A498NKD0		CPNE7	A0A498NJ35		mapk12	A0A498LTL2		eif2a	A0A498NTQ4		clic1	A0A498MCJ8		ank3	A0A498P2Z0		thbs4	A0A498MP89		napb	A0A498MS39		OGDHL	A0A498MQY5		tollip	A0A498MVA6		thbs4	A0A498MP89		ptpra	A0A498NKD0		esd	A0A498N9Q6
srpx2	A0A498LPR7		itga1	A0A498MJY7		hyou1	A0A498LY34		CPNE4	A0A498NKD7		tmem214	A0A498LN85		rfc1	A0A498N0B2		slc25a24	A0A498MBM2		carm1	A0A498N662		hadhb	A0A498NK83		tom1l2	A0A498LC95		hspa12a	A0A498P302		CYTH2	A0A498M5E2		RRM1	A0A498LIA0		myo1c	A0A498LHU8		dhrs7c	A0A498NHE3
unc13d	A0A498LPS8		fadd	A0A498MK14		snx6	A0A498MDJ5		mak16	A0A498MN95		plch2	A0A498LWN1		mars	A0A498NF02		ctsz	A0A498LKT3		PMM1	A0A498MHX8		serpinc1	A0A498MH64		pmp2	A0A498MRU3		cadps	A0A498LRQ3		hpcal4	A0A498P3S4		xab2	A0A498N3W7		nfyc	A0A498MZI8		fbp2	A0A498NRE8
spata20	A0A498LPT9		ralb	A0A498MK55		mars	A0A498NF02		brix1	A0A498MD24		syn2	A0A498NJI5		trip11	A0A498LYY9		brcc3	A0A498N6K7		gopc	A0A498LI52		serpinb1	A0A498NC80		fabp3	A0A498MWH4		adsl	A0A498MZR2		epn1	A0A498N5R3		hadhb	A0A498NK83		araf	A0A498L271		ogn	A0A498N7R3
gja1	A0A498LPU3		helb	A0A498MK68		mvd	A0A498MM36		parp1	A0A498LGP1		enah	A0A498M036		ada	A0A498MY71		echdc2	A0A498MNP2		tbc1d1	A0A498L925		HTRA2	A0A498MYC4		aldh3b1	A0A498N2C4		CYTH2	A0A498M5E2		napb	A0A498MS39		serpinb1	A0A498NBE7		braf	A0A498MF96		alad	A0A498MB86
ocrl	A0A498LPU4		ldhb	A0A498MKB6		yars	A0A498N049		dnaja2	A0A498ME23		cops5	A0A498MZ60		snrnp70	A0A498NMP8		eif3a	A0A498L5W0		pgm2	A0A498N046		suclg2	A0A498MPS1		aldh1a3	A0A498MHF6		napb	A0A498MS39		arl3	A0A498MW00		serpinc1	A0A498MH64		amylase	A0A498N5K0		myoz1	A0A498N7V3
eprs	A0A498LPV0		atp6v1b2	A0A498MKC1		bub3	A0A498LL89		gmps	A0A498LQI3		prep	A0A498NK12		MAP1B	A0A498N3F6		pc	A0A498NVD1		dync1li2	A0A498LWA9		OPLAH	A0A498NLG1		aldh9a1	A0A498NRW6		arl3	A0A498MW00		tagln3	A0A498NRS5		smarca5	A0A498LMB5		ist1	A0A498ME94		pdlim7	A0A498N3Z6
lgi3	A0A498LPV2		SCO1	A0A498MKC8		LMTK3	A0A498NJ80		nck2	A0A498M8A4		sar1b	A0A498LDZ5		eif4h	A0A498M1G8		pdcd6ip	A0A498NAQ7		mylk	A0A498NP17		echs1	A0A498MUH8		me3	A0A498NAP3		fabp3	A0A498MWH4		pmp2	A0A498MRU3		suclg2	A0A498MPS1		sf3b2	A0A498MJL5		anxa1	A0A498NJQ3
afap1l2	A0A498LPY6		gmpr2	A0A498MKE8		sec23ip	A0A498P0P1		nck1	A0A498M3P0		pkd1l1	A0A498LFD6		cars	A0A498LSF8		rnf103	A0A498MV71		mapk12	A0A498LTL2		aco1	A0A498MTB1		jakmip2	A0A498N6P6		pmp2	A0A498MRU3		fabp3	A0A498MWH4		OPLAH	A0A498NLG1		cpeb3	A0A498LUK4		bag6	A0A498MCG5
cadm4	A0A498LQ06		alox15	A0A498MKJ1		rpl31	A0A498MC52		sf3a2	A0A498MZH9		snx4	A0A498NHT1		ppm1a	A0A498MCG3		hp1bp3	A0A498MUK5		sf3b3	A0A498MBG5		aldh6a1	A0A498M1U7		adk	A0A498N453		actr3b	A0A498NRS4		actr3b	A0A498NRS4		atp2b4	A0A498LE85		cpeb4	A0A498NTA6		C14orf166	A0A498LP40
cdc42ep4	A0A498LQ15		snd1	A0A498MKL8		rars	A0A498LTZ7		dnmt1	A0A498L7Q3		kif13b	A0A498LM25		slc3a1	A0A498N651		pvrl1	A0A498M3K4		bzw1	A0A498LKG8		acadl	A0A498N4S4		ipo5	A0A498NA00		ide	A0A498LTM7		aldh1a3	A0A498MHF6		atp2b2	A0A498NJB6		trappc3	A0A498MH32		polr2c	A0A498MLT3
bai3	A0A498LQ21		ctnnd1	A0A498MKM0		ap1m2	A0A498NL71		ctnnbl1	A0A498NQE6		kif1a	A0A498MDU7		usp5	A0A498N1H3		gsn	A0A498NKF8		arl15	A0A498MXK1		ldhd	A0A498MUN0		adh5	A0A498MXR4		me3	A0A498NAP3		aldh9a1	A0A498NRW6		rpe	A0A498NB21		ATG7	A0A498NJK5		eif4h	A0A498M1G8
DDB1	A0A498LQ23		bag1	A0A498MKQ1		elavl3	A0A498MPM9		map1lc3b	A0A498LYC4		CAMK1	A0A498LF47		acaa1	A0A498LP08		capn11	A0A498LZE6		myo5b	A0A498MYA4		sar1b	A0A498LDZ5		cpt2	A0A498NR22		mpp2	A0A498N429		HPCAL1	A0A498LDM3		echs1	A0A498MUH8		sept6	A0A498LGV3		psmb2	A0A498MZP1
comtd1	A0A498LQ30		gipc1	A0A498MKT8		elavl4	A0A498NS54		ntmt1	A0A498LY72		col11a1	A0A498NVZ6		pin4	A0A498NU90		padi2	A0A498LR20		dnm2	A0A498M3Y7		ivd	A0A498MHV3		txlna	A0A498LYA1		jakmip2	A0A498N6P6		ncald	A0A498LGU7		aldh6a1	A0A498M1U7		hadhb	A0A498NK83		cav3	A0A498LEL3
thop1	A0A498LQ71		kras	A0A498MKW9		elavl2	A0A498NML0		dsp	A0A498M167		myl2	A0A498NR32		hm13	A0A498LEV3		arhgap1	A0A498MAL1		sept10	A0A498MAY9		sord	A0A498L7C3		fabp7	A0A498LTJ0		ogt	A0A498MSU8		me3	A0A498NAP3		hmgcl	A0A498NCN4		PRIM2	A0A498N7X6		spcs3	A0A498LC14
snx5	A0A498LQ72		pdlim2	A0A498ML07		hbs1l	A0A498MLX6		csnk1a1	A0A498NCK2		mybpc3	A0A498M8F9		st13	A0A498NMR0		stau2	A0A498N771		gfpt2	A0A498LPI3		ncald	A0A498LGU7		ass1	A0A498MVZ3		adh5	A0A498MXR4		adk	A0A498N453		acmsd	A0A498N8L8		serpinc1	A0A498MH64		banf1	A0A498MYH6
kyat1	A0A498LQ81		olfml3	A0A498ML14		rnf2	A0A498MDT8		myo7a	A0A498NUD1		PLCB4	A0A498NSX7		ugdh	A0A498N1B2		c3	A0A498MZG2		KCTD12	A0A498LBV4		HPCAL1	A0A498LDM3		rpl28	A0A498NGN3		atic	A0A498NBQ9		map1lc3b	A0A498LYC4		glrx3	A0A498LFT5		serpinb1	A0A498NC80		fkbp2	A0A498N4H0
lrsam1	A0A498LQ91		galns	A0A498ML35		cpne8	A0A498MLG3		amylase	A0A498LUK2		arfgap3	A0A498L4B6		gfpt2	A0A498LPI3		ttc25	A0A498LWD3		mcee	A0A498L6Z5		snx3	A0A498LKX7		vamp1	A0A498LKF6		lancl2	A0A498LF21		adh5	A0A498MXR4		dmgdh	A0A498MPE4		smarca5	A0A498LMB5		hint1	A0A498LW95
dab2	A0A498LQA2		slc9b2	A0A498ML40		gtpbp1	A0A498LB06		hk1	A0A498N0I6		pde6a	A0A498NT55		nnt	A0A498N8P1		mccc1	A0A498MVF3		gne	A0A498MC65		calb2	A0A498MBC2		ace	A0A498LUH0		ctnnbl1	A0A498NQE6		atic	A0A498NBQ9		acadl	A0A498N4S4		cask	A0A498NDR7		zmiz2	A0A498N9I9
bcas3	A0A498LQB6		ube2h	A0A498ML75		abr	A0A498MTF1		hkdc1	A0A498N424		rlbp1	A0A498MEZ4		hoga1	A0A498MAV9		crat	A0A498MJ07		acbd3	A0A498MAD5		crmp1	A0A498MGP7		crabp1	A0A498LAL7		hspa4	A0A498NTF6		ccr9	A0A498N962		ldhd	A0A498MUN0		rpap3	A0A498N2G5		txndc5	A0A498NBH4
hmbs	A0A498N9V5		lum	A0A498ML95		bcr	A0A498NKW6		arhgap1	A0A498MAL1		npepl1	A0A498MZQ6		sardh	A0A498MXH8		aldh9a1	A0A498LEV5		ttbk2	A0A498M0Z0		dpys	A0A498L4W1		gpd1l	A0A498LFE6		cpt2	A0A498NR22		akr1a1	A0A498NTT9		sar1b	A0A498LDZ5		atp2b4	A0A498LE85		dctn2	A0A498NC63
nop16	A0A498LQF8		dnph1	A0A498MLG0		prdx2	A0A498LM50		dlg3	A0A498LL25		phyhipl	A0A498NAQ3		atp13a1	A0A498N9S3		eef1g	A0A498NTK4		PLCB4	A0A498NTC0		atp6v1h	A0A498MJS7		scfd1	A0A498MN03		ass1	A0A498MVZ3		cpt2	A0A498NR22		ivd	A0A498MHV3		atp2b2	A0A498NJB6		pkd1l1	A0A498LFD6
polr3a	A0A498LQF9		acan	A0A498MLI6		iars2	A0A498N5U1		gpm6a	A0A498LGQ1		me1	A0A498NJ16		gys2	A0A498MD49		ndrg2	A0A498LFM0		abhd16a	A0A498LBG1		anxa10	A0A498MXP6		glo1	A0A498LP57		rab18	A0A498NTT7		sh3glb1	A0A498M723		sardh	A0A498MXH8		rpe	A0A498NB21		txndc12	A0A498NUQ3
pitpnm3	A0A498LQH9		rbbp4	A0A498MLJ2		diaph2	A0A498N160		hagh	A0A498MFI3		cstf1	A0A498MJ92		gys1	A0A498LZL8		phgdh	A0A498MR33		casp3	A0A498N149		ppm1a	A0A498MCG3		pebp1	A0A498NG47		txlna	A0A498LYA1		txlna	A0A498LYA1		vwa8	A0A498MNQ1		echs1	A0A498MUH8		fgg	A0A498LEH5
SSH1	A0A498LQI0		acot13	A0A498MLJ8		dnm2	A0A498M3Y7		ampd1	A0A498LYA9		adam10	A0A498LCA1		abcd3	A0A498NDM8		ndrg4	A0A498MQ33		casp7	A0A498LWI8		slc3a1	A0A498N651		ak1	A0A498LXQ7		fabp7	A0A498LTJ0		fabp7	A0A498LTJ0		hsd17b4	A0A498NEL9		oxct1	A0A498MG85		prelp	A0A498MSP0
gmps	A0A498LQI3		polr2c	A0A498MLT3		tsnax	A0A498LQL6		FBN3	A0A498MW06		strn3	A0A498MVV8		snx5	A0A498LQ72		st13	A0A498NMR0		pgam5	A0A498NGG7		slc38a7	A0A498MQJ7		ak3	A0A498MXG2		rpl28	A0A498NGN3		ass1	A0A498MVZ3		snx3	A0A498LKX7		aldh6a1	A0A498M1U7		DHRS2	A0A498MT19
slc16a9	A0A498LQI4		ncan	A0A498MLV6		rufy3	A0A498MAE6		srl	A0A498MXC3		dbt	A0A498NZ94		hdlbp	A0A498LCI4		hadhb	A0A498NK83		araf	A0A498L271		snap25	A0A498LLP4		srp54	A0A498MQC4		timm44	A0A498MVI3		rpl28	A0A498NGN3		hgd	A0A498N1P6		glrx3	A0A498LFT5		dbi	A0A498LFM5
scai	A0A498LQJ0		ptprs	A0A498MLX4		grpel1	A0A498MDZ5		neb	A0A498N3Y5		nudc	A0A498NQC1		uggt1	A0A498NGH7		tufm	A0A498NTL2		braf	A0A498MF96		hspa12a	A0A498P302		bckdha	A0A498LC60		vamp1	A0A498LKF6		timm44	A0A498MVI3		pmp2	A0A498MRU3		acadl	A0A498N4S4		tysnd1	A0A498MTV6
rabggta	A0A498LQJ1		hbs1l	A0A498MLX6		mta2	A0A498LCW4		rad21	A0A498MV43		sod1	A0A498LF02		aass	A0A498MD26		ndufa10	A0A498NBA5		pkmyt1	A0A498NLR2		adsl	A0A498MZR2		ssr3	A0A498MN87		rpl21	A0A498NSE5		rpl21	A0A498NSE5		fabp3	A0A498MWH4		ldhd	A0A498MUN0		blvrb	A0A498MNG1
pip5kl1	A0A498LQJ7		rpl32	A0A498MLZ6		ctnna2	A0A498MTB9		srsf10	A0A498M722		RMDN1	A0A498MCU4		srp68	A0A498ME85		rusc1	A0A498M085		akt1	A0A498NSQ3		tollip	A0A498MVA6		magt1	A0A498N4G3		scfd1	A0A498MN03		crabp1	A0A498LAL7		epn1	A0A498N5R3		sar1b	A0A498LDZ5		nampt	A0A498NA34
pgrmc1	A0A498LQK2		iqgap1	A0A498MM11		SV2A	A0A498L915		sf3b2	A0A498MJL5		acsl4	A0A498NUU4		pcca	A0A498L3R2		idh3g	A0A498N8I6		akt2	A0A498MFH8		CYTH2	A0A498M5E2		kiaa0368	A0A498N963		crabp1	A0A498LAL7		dtymk	A0A498L8C8		crmp1	A0A498MGP7		ivd	A0A498MHV3		pdhx	A0A498M637
ruvbl2	A0A498LQK9		mvd	A0A498MM36		impdh2	A0A498NDI4		esyt1	A0A498P1N8		carm1	A0A498N662		aldh4a1	A0A498LXF0		apex1	A0A498MXE5		umps	A0A498N4V9		epn1	A0A498N5R3		tmem33	A0A498N5A5		cdk5rap3	A0A498LSG3		cdk5rap3	A0A498LSG3		dpys	A0A498L4W1		sardh	A0A498MXH8		dbt	A0A498NZ94
agmat	A0A498LQL0		cops4	A0A498MM59		uap1l1	A0A498LPN6		ist1	A0A498ME94		creb1	A0A498L309		pdia5	A0A498NHN2		crk	A0A498LHE2		pank2	A0A498MZA7		napb	A0A498MS39		nup155	A0A498MMI4		glo1	A0A498LP57		glo1	A0A498LP57		slc38a7	A0A498MQJ7		ehd3	A0A498LKP9		apobec2	A0A498MYI0
tsnax	A0A498LQL6		ppp2r5d	A0A498MM69		coro2b	A0A498NX50		mat2b	A0A498LGG2		add2	A0A498NGA5		acadsb	A0A498LMG7		ero1l	A0A498LKD0		pck1	A0A498NC69		fabp3	A0A498MWH4		rpl18	A0A498NPB6		ak1	A0A498LXQ7		pebp1	A0A498NG47		OGDHL	A0A498MQY5		snx3	A0A498LKX7		clpp	A0A498N353
ergic3	A0A498LQN5		anxa3	A0A498MM94		lzic	A0A498P0C7		adam10	A0A498LCA1		mink1	A0A498N4C9		gcdh	A0A498NU21		cab39l	A0A498NJV9		pck2	A0A498N0Y6		pmp2	A0A498MRU3		COQ7	A0A498L9L3		bckdha	A0A498LC60		ak1	A0A498LXQ7		hk1	A0A498N0I6		efhd2	A0A498LP25		eci1	A0A498MX93
acp1	A0A498LQP8		c5	A0A498MMD9		ppid	A0A498LWH4		tnnc2	A0A498N0H1		map4k4	A0A498MQ09		STARD10	A0A498MIP6		sfxn1	A0A498LYC7		pkd1l1	A0A498LFD6		actr3b	A0A498NRS4		vapb	A0A498LN48		rae1	A0A498N8H1		bckdha	A0A498LC60		map1lc3a	A0A498MSG3		efhd1	A0A498L9R3		wrb	A0A498NQE4
ATE1	A0A498LQQ0		FAM98C	A0A498MME2		kiaa1045	A0A498NU62		gpn3	A0A498NKJ5		slc16a9	A0A498LQI4		SLC25A10	A0A498M8Q5		vdac3	A0A498NI22		UNC13C	A0A498NTC3		aldh1a3	A0A498MHF6		col12a1	A0A498M2L1		ssr3	A0A498MN87		aldh18a1	A0A498LMW6		adsl	A0A498MZR2		crmp1	A0A498MGP7		coq10b	A0A498N7V9
exosc1	A0A498LQQ5		calr3	A0A498MMJ7		srsf2	A0A498LSM2		ELOA	A0A498MX46		parva	A0A498M9A8		tmed4	A0A498LFE7		pcbp2	A0A498LAX0		vars	A0A498LBP2		aldh9a1	A0A498NRW6		hibadha	A0A498MZS1		pds5a	A0A498N1E0		ssr3	A0A498MN87		tollip	A0A498MVA6		dpys	A0A498L4W1		hspb2	A0A498M953
camkk1	A0A498LQQ9		C5orf51	A0A498MMK1		flii	A0A498LDS4		ogt	A0A498MSU8		pdhx	A0A498M637		rabl3	A0A498NCW8		dyrk4	A0A498MTT4		parva	A0A498M9A8		aldh3b1	A0A498N2C4		chd4	A0A498NJC5		CEP192	A0A498LC83		pds5a	A0A498N1E0		napb	A0A498MS39		slc3a1	A0A498N651		acy1	A0A498N1Q7
hps5	A0A498NSX8		arrb2	A0A498MMT3		atp6v1c1	A0A498N769		smc1a	A0A498LVV3		tnpo3	A0A498MFC2		mtx2	A0A498NNV7		hnrnpa3	A0A498LJ97		apoa1bp	A0A498M809		aldh1a2	A0A498L6Y8		skiv2l2	A0A498MEF2		stt3a	A0A498MJ33		kiaa0368	A0A498N963		tom1l2	A0A498LC95		ppm1a	A0A498MDX5		rgn	A0A498NNC6
nup133	A0A498LQR3		serpine1	A0A498MMU1		hadha	A0A498LIF2		flii	A0A498LDS4		ddc	A0A498LCB0		manf	A0A498MIU3		stom	A0A498NKN9		CDH16	A0A498M4C2		cmpk1	A0A498N071		taok2	A0A498MM58		magt1	A0A498N4G3		parp1	A0A498LGP1		aldh1a3	A0A498MHF6		slc38a7	A0A498MQJ7		ALPK1	A0A498NF89
slc25a21	A0A498LQR8		amt	A0A498MMV2		myo18a	A0A498M0Q9		nek7	A0A498MQR6		hp1bp3	A0A498MUK5		rtn1	A0A498M5S4		anxa4	A0A498M537		man1c1	A0A498M6B8		me3	A0A498NAP3		trip11	A0A498LYY9		kiaa0368	A0A498N963		tmem33	A0A498N5A5		aldh9a1	A0A498NRW6		hspa12a	A0A498P302		eif4e	A0A498LFK8
col6a6	A0A498LQS3		ndufs8	A0A498MMX0		eif3m	A0A498NED7		celf1	A0A498MDW1		cdc37	A0A498MDY1		rtn3	A0A498LGC7		hnrnpa0	A0A498N148		man1a1	A0A498M551		jakmip2	A0A498N6P6		ada	A0A498MY71		itpr1	A0A498NQL6		nup155	A0A498MMI4		aldh1a2	A0A498L6Y8		vat1l	A0A498ME27		mlec	A0A498MDW3
srpx	A0A498N4E7		cd9	A0A498MN46		srgap1	A0A498MVH4		sept10	A0A498MAY9		phgdh	A0A498MR33		naa50	A0A498NT28		hsd17b12	A0A498MW42		npepl1	A0A498MZQ6		lgals8	A0A498M7S6		slc3a1	A0A498N651		nup155	A0A498MMI4		AP3B1	A0A498M1W5		HPCAL1	A0A498LDM3		adsl	A0A498MZR2		denr	A0A498N0M9
ly75	A0A498LQS4		ssbp1	A0A498MN52		srgap2	A0A498LLS7		tpp1	A0A498M886		arhgap15	A0A498NEN6		rps10	A0A498LD02		anxa10	A0A498MXP6		exosc4	A0A498N898		arl3	A0A498MW00		ppm1a	A0A498MDX5		ero1l	A0A498LKD0		COQ7	A0A498L9L3		ncald	A0A498LGU7		CYTH2	A0A498M5E2		yars	A0A498N049
patl1	A0A498LQS9		capza1	A0A498MN53		ptbp1	A0A498LJP8		ube2h	A0A498ML75		faf1	A0A498NRK1		chp1	A0A498LVS8		cops7a	A0A498LG70		edf1	A0A498LRJ3		adh5	A0A498MXR4		usp5	A0A498N1H3		COQ7	A0A498L9L3		vapb	A0A498LN48		adk	A0A498N453		hpcal4	A0A498P3S4		dnajc12	A0A498LNK7
dpy30	A0A498LQX0		PRKAR2B	A0A498MN60		ptbp3	A0A498MJ90		smarca2	A0A498NQS2		efhd1	A0A498L9R3		cpeb1	A0A498M8V5		eef1b2	A0A498NP09		stk38	A0A498LP65		nefl	A0A498MI91		scp2	A0A498M8P4		arf6	A0A498NTC1		col12a1	A0A498M2L1		kif13b	A0A498LM25		napb	A0A498MS39		etfdh	A0A498LWE7
fads2	A0A498LQZ2		ssr3	A0A498MN87		hmgcs1	A0A498LWA2		stam2	A0A498NI83		efhd2	A0A498LP25		lrpprc	A0A498N968		bmp6	A0A498NBG7		DCX	A0A498NMA4		uggt1	A0A498NGH7		acaa1	A0A498LP08		col12a1	A0A498M2L1		hibadha	A0A498MZS1		adh5	A0A498MXR4		arl3	A0A498MW00		TPMT	A0A498NAT0
nploc4	A0A498LR06		pcmt1	A0A498MN94		brap	A0A498N3W5		prkag1	A0A498LH41		fhl3	A0A498NIJ0		adck3	A0A498LD68		gbas	A0A498LR17		elavl3	A0A498MPM9		cpt2	A0A498NR22		pin4	A0A498NU90		stk26	A0A498N9U1		wdr18	A0A498NJJ6		lancl2	A0A498LF21		tagln3	A0A498NRS5		CUTA	A0A498NKY3
gbas	A0A498LR17		eif4a3	A0A498MNF1		polr2c	A0A498MLT3		tmod3	A0A498N4C6		gmppa	A0A498NPA3		mrpl15	A0A498MA95		gstm3	A0A498LT46		ANK2	A0A498MI53		rab18	A0A498LVL4		fermt1	A0A498MUZ9		hibadha	A0A498MZS1		taok2	A0A498MM58		akr1a1	A0A498NTT9		pmp2	A0A498MRU3		CALD1	A0A498MUT6
padi2	A0A498LR20		gnb4	A0A498MNF8		arih2	A0A498LST9		usp5	A0A498N1H3		mccc1	A0A498MVF3		ergic1	A0A498MW07		acot9	A0A498NT14		nudc	A0A498NQC1		sh3glb1	A0A498M723		SEC24B	A0A498N838		pitrm1	A0A498L3Z8		trip11	A0A498LYY9		nefl	A0A498MI91		fabp3	A0A498MWH4		myoz2	A0A498NJH4
tbcc	A0A498LR41		blvrb	A0A498MNG1		dnajc7	A0A498M6L9		mrto4	A0A498LVI3		dctn2	A0A498NC63		emc3	A0A498L630		rpl7	A0A498LJU3		sod1	A0A498LF02		txlna	A0A498LYA1		st13	A0A498NMR0		KATNAL1	A0A498M7J9		ada	A0A498MY71		ahcyl1	A0A498N8Y0		aldh1a2	A0A498L6Y8		rpl14	A0A498N3B3
plek2	A0A498LR71		eya3	A0A498MNH3		pc	A0A498NTR3		kif5c	A0A498N878		rdh14	A0A498N127		mrpl4	A0A498LRL5		psmb3	A0A498MYG1		RMDN1	A0A498MCU4		fabp7	A0A498LTJ0		ctnnd1	A0A498MKM0		chd4	A0A498NJC5		yars	A0A498N049		cpt2	A0A498NR22		aldh9a1	A0A498LEV5		arhgdia	A0A498LI33
rps23	A0A498LR94		RPL37A	A0A498MNH9		SUCLA2	A0A498NNW1		fam171a1	A0A498NCE6		vrk3	A0A498MQK5		rnf103	A0A498MV71		atp5o	A0A498NAQ8		acsl4	A0A498NUU4		rpl28	A0A498NGN3		nnt	A0A498N8P1		srp54	A0A498MQC4		api5	A0A498MBP6		txlna	A0A498LYA1		aldh1a3	A0A498MHF6		ssb	A0A498NSJ3
gtpbp6	A0A498LR98		fam213b	A0A498MNJ8		cfl2	A0A498MQK3		bzw1	A0A498LKG8		HOOK3	A0A498MW44		ugt1a1	A0A498NDU4		gstp1	A0A498NEU1		ech1	A0A498NP92		rpl21	A0A498NSE5		hoga1	A0A498MAV9		eif2a	A0A498NTQ4		mcm7	A0A498MPF1		fabp7	A0A498LTJ0		aldh3b1	A0A498N2C4		pip4k2a	A0A498L6U4
TMPRSS6	A0A498NLA7		ACTC1	A0A498MNR6		RAB37	A0A498LTK1		mylk	A0A498NP17		tnni1	A0A498MJC0		CYTB	V5XVB7		KATNAL1	A0A498M7J9		ap3d1	A0A498MUR0		ykt6	A0A498N3I9		atp13a1	A0A498N9S3		taok2	A0A498MM58		naa50	A0A498NT28		rpl28	A0A498NGN3		adh5	A0A498MXR4		pgam5	A0A498NGG7
rps19	A0A498LRA6		mtx1	A0A498MNT9		rab27b	A0A498N7M2		mapk12	A0A498LTL2		gpd1l	A0A498LFE6		faf2	A0A498NEQ6		rpl10	A0A498L8B5		api5	A0A498MBP6		crabp1	A0A498LAL7		c3	A0A498M2X6		plcb3	A0A498NTG7		cars	A0A498LSF8		timm44	A0A498MVI3		me3	A0A498NAP3		tgm1	A0A498LCV7
hexdc	A0A498LRC0		ambp	A0A498MNZ5		rab3c	A0A498NR85		hibadha	A0A498MZS1		myl10	A0A498N5U9		slc25a21	A0A498LQR8		hmgb2	A0A498LD75		uso1	A0A498NFH4		map1lc3a	A0A498MSG3		snx5	A0A498LQ72		plcb1	A0A498NTZ2		usp5	A0A498N1H3		ykt6	A0A498N3I9		prpf6	A0A498NW67		hspa4	A0A498NTF6
OGFOD3	A0A498LRE0		mmp2	A0A498MP00		rab30	A0A498MYA6		aarsd1	A0A498LUG3		purg	A0A498LUM9		pmpca	A0A498N1I4		atp5f1	A0A498NAE3		polr2a	A0A498LS48		scfd1	A0A498MN03		hdlbp	A0A498LCI4		trip11	A0A498LYY9		snx5	A0A498LQ72		gpd1l	A0A498LFE6		acp1	A0A498LQP8		UBXN4	A0A498P3E8
znf346	A0A498LRE1		bckdk	A0A498MP23		rab27a	A0A498NT07		araf	A0A498L271		itgav	A0A498N1H6		picalm	A0A498LLQ2		ak1	A0A498LXQ7		map4k4	A0A498MQ09		papola	A0A498MA91		ephx2	A0A498NP55		ada	A0A498MY71		scp2	A0A498M8P4		scfd1	A0A498MN03		lancl2	A0A498LF21		kiaa1715	A0A498LG57
bcam	A0A498LRE4		plg	A0A498MP37		rab3b	A0A498LLB3		arl15	A0A498MXK1		gclc	A0A498MZ28		farsa	A0A498NUW6		sod2	A0A498LKV8		mink1	A0A498N4C9		glo1	A0A498LP57		aox1	A0A498MB87		yars	A0A498N049		acaa1	A0A498LP08		cdk5rap3	A0A498LSG3		ccr9	A0A498N962		lnpb	A0A498NNC2
MRPS17	A0A498LRF8		acat1	A0A498MP51		rab3d	A0A498NQ75		dnm2	A0A498M3Y7		SNTB2	A0A498NEB7		sh3bp2	A0A498NER5		ykt6	A0A498N3I9		afg3l2	A0A498MHN6		afg3l2	A0A498MHN6		srp68	A0A498ME85		kpna3	A0A498NKE3		pin4	A0A498NU90		glo1	A0A498LP57		akr1a1	A0A498NTT9		yod1	A0A498MRP2
spg7	A0A498LRG0		tdrd5	A0A498MP71		rab9a	A0A498NNX0		ptpn11	A0A498NBW8		adk	A0A498N453		akap10	A0A498MS40		gpx1	A0A498NS09		stam2	A0A498NI83		bckdha	A0A498LC60		pcca	A0A498L3R2		tmed9	A0A498NTD8		fermt1	A0A498MUZ9		pebp1	A0A498NG47		nefl	A0A498MI91		lactb2	A0A498NT66
vtn	A0A498LQ67		copb1	A0A498MP80		rab4b	A0A498M0T0		fxr2	A0A498MYT5		ndrg4	A0A498MQ33		pi4k2a	A0A498LLY9		tsn	A0A498NEX9		SLC25A10	A0A498M8Q5		ssr3	A0A498MN87		aldh4a1	A0A498LXF0		ube2m	A0A498MC44		st13	A0A498NMR0		polr2a	A0A498LS48		cpt2	A0A498NR22		pgp	A0A498L837
ush1c	A0A498MGB3		thbs4	A0A498MP89		rab12	A0A498MTM6		fmr1	A0A498LNV6		pde6c	A0A498LV54		rgn	A0A498NNC6		psmb2	A0A498MZP1		PTPRD	A0A498MQA6		PNPT1	A0A498L5N9		acox1	A0A498M7H7		polr1c	A0A498MYZ9		gclc	A0A498MZ28		bckdha	A0A498LC60		ass1	A0A498MVZ3		fkbp3	A0A498NTU1
mpped2	A0A498LRI7		WDR1	A0A498MPH1		thoc6	A0A498NPP4		fxr1	A0A498P5C7		DDAH1	A0A498M2T9		pter	A0A498NZP2		psmb6	A0A498LJQ3		ptprf	A0A498N226		CEP192	A0A498LC83		SLC25A22	A0A498LZI8		usp5	A0A498N1H3		ctnnd1	A0A498MKM0		pex14	A0A498LUH5		plekhm2	A0A498MXX3		acot9	A0A498NT14
dmd	A0A498LRJ1		CAPN1	A0A498MPI7		rab39b	A0A498LGI2		ggps1	A0A498LNH9		fstl5	A0A498M5P0		pebp1	A0A498NG47		tpt1	A0A498L311		nek7	A0A498MQR6		myo1c	A0A498LHJ3		csnk1a1	A0A498NCK2		acaa1	A0A498LP08		nnt	A0A498N8P1		rae1	A0A498N8H1		sh3glb1	A0A498M723		abhd10	A0A498MFZ3
cirh1a	A0A498LRJ2		b4gat1	A0A498MPM1		rpn1	A0A498NHG3		polr2c	A0A498MLT3		wdr37	A0A498LWI2		ostf1	A0A498MRW3		cmpk1	A0A498N071		armc8	A0A498N829		magt1	A0A498N4G3		chmp1a	A0A498M640		pin4	A0A498NU90		hoga1	A0A498MAV9		ssr3	A0A498MN87		aamdc	A0A498NTK6		hspb8	A0A498LKJ6
prkaa1	A0A498LRJ7		elavl3	A0A498MPM9		acadm	A0A498LBY9		nop16	A0A498LQF8		dhrs12	A0A498N7U4		rab24	A0A498M4I9		glo1	A0A498LP57		prmt5	A0A498NGI1		kiaa0368	A0A498N963		RMDN1	A0A498MCU4		fermt1	A0A498MUZ9		cluh	A0A498LHF1		pds5a	A0A498N1E0		fabp7	A0A498LTJ0		tango2	A0A498NJN4
NRAP	A0A498LRJ9		vcp	A0A498MPP7		gsr	A0A498N4Q6		ndufa10	A0A498NBA5		thop1	A0A498LQ71		dnaja2	A0A498ME23		cnbp	A0A498NJ76		ptpn11	A0A498NBW8		parp1	A0A498LGP1		tmed9	A0A498NTD8		st13	A0A498NMR0		gys2	A0A498MD49		myo1c	A0A498LHJ3		rpl28	A0A498NGN3		cops8	A0A498NEP6
GARNL3	A0A498LRL1		ubxn6	A0A498MPQ1		dsp	A0A498M167		cbr1	A0A498NJN0		fermt1	A0A498MUZ9		kpna3	A0A498NKE3		copz1	A0A498LTD9		polr2e	A0A498NNF7		tmem33	A0A498N5A5		tmed4	A0A498LFE7		SLC39A3	A0A498MYF6		gys1	A0A498LZL8		srprb	A0A498M7U4		timm44	A0A498MVI3		adi1	A0A498N2V1
rangap1	A0A498LRL2		hsdl2	A0A498MPQ6		tra2a	A0A498N3P9		COPS6	A0A498MS62		lgi1	A0A498LX10		slc16a9	A0A498LQI4		rpl18a	A0A498LIH2		fam210b	A0A498N975		nup155	A0A498MMI4		mtx2	A0A498NNV7		ugdh	A0A498N1B2		c3	A0A498M2X6		magt1	A0A498N4G3		vamp1	A0A498LKF6		hdhd1	A0A498L319
mrpl4	A0A498LRL5		suclg2	A0A498MPS1		nebl	A0A498M2X7		ppm1g	A0A498N7H5		SPIDR	A0A498MSK4		nck2	A0A498M8A4		rtn4	A0A498N4P6		crip1	A0A498LGM3		ero1l	A0A498LKD0		rtn1	A0A498M5S4		gfpt2	A0A498LPI3		hdlbp	A0A498LCI4		kiaa0368	A0A498N963		map1lc3a	A0A498MSG3		tmco1	A0A498NRB8
nat9	A0A498LRM6		decr2	A0A498MPU1		papss2	A0A498NFB2		PLCB4	A0A498NTC0		mmp2	A0A498MP00		nck1	A0A498M3P0		b4gat1	A0A498MPM1		exoc5	A0A498M1V8		tubgcp2	A0A498N421		rtn3	A0A498LGC7		clic1	A0A498MCJ8		ephx2	A0A498NP55		PRKAR2B	A0A498MN60		gpd1l	A0A498LFE6		acp1	A0A498LQP8
ppp2r4	A0A498LRM8		uba1	A0A498MPV8		nfic	A0A498NRG7		braf	A0A498MF96		suclg2	A0A498MPS1		rtca	A0A498MM56		rpl32	A0A498MLZ6		jak1	A0A498NAB0		rpl18	A0A498NPB6		naa50	A0A498NT28		clic2	A0A498LIJ7		aldh4a1	A0A498LXF0		tmem33	A0A498N5A5		thop1	A0A498LQ71		fam136a	A0A498MJT0
eps8l2	A0A498LRM9		snrpf	A0A498MPZ9		wdr11	A0A498MKV0		kif13b	A0A498LM25		acsl5	A0A498LRL0		csnk1a1	A0A498NCK2		ppih	A0A498M607		tjp2	A0A498MYC9		COQ7	A0A498L9L3		rps10	A0A498LD02		acsl5	A0A498LRL0		pdia5	A0A498NHN2		nup155	A0A498MMI4		glo1	A0A498LP57		habp2	A0A498NEC0
zc3h7b	A0A498LRQ2		map4k4	A0A498MQ09		spg7	A0A498LRG0		kif1a	A0A498MDU7		col12a1	A0A498NK49		myo7a	A0A498NUD1		dgkz	A0A498N004		tjp3	A0A498MUR5		col12a1	A0A498M2L1		ssbp1	A0A498MN52		acsl1	A0A498LDW3		acadsb	A0A498LMG7		AP3B1	A0A498M1W5		pebp1	A0A498NG47		cul3	A0A498NAG6
VWA5A	A0A498LRS0		myof	A0A498MQ20		naa50	A0A498NT28		myl2	A0A498NR32		usp14	A0A498N6B6		hspb1	A0A498NLH3		rps10	A0A498LD02		AGO2	A0A498MVZ4		hibadha	A0A498MZS1		ndufa7	A0A498LW32		nnt	A0A498N8P1		hao1	A0A498MC15		ero1l	A0A498LKD0		ak1	A0A498LXQ7		fxr1	A0A498P5C7
dpp7	A0A498LRS8		cnpy4	A0A498MQ27		kpna3	A0A498NKE3		pck1	A0A498NC69		capn3	A0A498LUN0		arhgap1	A0A498MAL1		prdx5	A0A498NCD5		AGO1	A0A498MHI7		trip12	A0A498MF43		lrpprc	A0A498N968		hoga1	A0A498MAV9		gcdh	A0A498NNP0		COQ7	A0A498L9L3		ak3	A0A498MXG2		adck3	A0A498LD68
zzef1	A0A498LRV0		ndrg4	A0A498MQ33		evl	A0A498P4J4		pck2	A0A498N0Y6		ndufa6	A0A498MHB9		usp10	A0A498NJ04		fabp7	A0A498LTJ0		AGO3	A0A498M6D2		rbm27	A0A498N3F5		adck3	A0A498LD68		gys2	A0A498MD49		acox1	A0A498M7H7		vapb	A0A498LN48		bckdha	A0A498LC60		sec23a	A0A498MIT6
noxa1	A0A498LRV2		wbp2nl	A0A498MQC9		ephb3	A0A498L7L7		fbn1	A0A498M6Z5		zmiz2	A0A498N9I9		RPS6KA2	A0A498N7E2		glipr2	A0A498NDJ7		AGO4	A0A498N3A3		taok2	A0A498MM58		acad11	A0A498N5W9		sec23b	A0A498N4Q4		SLC25A22	A0A498LZI8		col12a1	A0A498M2L1		stt3a	A0A498MJ33		agpat3	A0A498NKN5
smarca5	A0A498LMB5		psmd9	A0A498MQE7		epha4	A0A498L7Y2		mybpc3	A0A498M8F9		capn12	A0A498MUK3		HOMER2	A0A498MAW9		cotl1	A0A498N767		sorbs2	A0A498MUC4		plcb3	A0A498NTG7		emc3	A0A498L630		srprb	A0A498M7U4		chmp1a	A0A498M640		stk26	A0A498N9U1		pex14	A0A498LUH5		g6pd	A0A498NGC9
apoa1	A0A498MYF5		slc38a7	A0A498MQJ7		ephb2	A0A498N6Z2		cstf2	A0A498NBW5		sdcbp	A0A498LUF9		pkd1l1	A0A498LFD6		C11orf65	A0A498N5G5		fhl3	A0A498NIJ0		plcb1	A0A498NTZ2		tjp2	A0A498MYC9		c3	A0A498M2X6		RMDN1	A0A498MCU4		hibadha	A0A498MZS1		ssr3	A0A498MN87		macf1	A0A498LAN4
ccdc88c	A0A498LRY7		cfl2	A0A498MQK3		shoc2	A0A498LHG9		vars	A0A498LBP2		sec13	A0A498MAC6		smarcd1	A0A498NID7		pfn2	A0A498LY02		fhl5	A0A498LMN9		trip11	A0A498LYY9		sec24d	A0A498NJ66		snx5	A0A498LQ72		tmed9	A0A498NTD8		pitrm1	A0A498L3Z8		OGDHL	A0A498MQY5		afg3l2	A0A498MHN6
nanp	A0A498LS21		vrk3	A0A498MQK5		urod	A0A498LJC4		tmem214	A0A498LN85		CYTH2	A0A498M5E2		esyt1	A0A498P1N8		fkbp1a	A0A498LWN3		slc9b2	A0A498ML40		ada	A0A498MY71		rnf103	A0A498MV71		vwa8	A0A498MMG3		tmed4	A0A498LFE7		gosr2	A0A498LAH1		CEP192	A0A498LC83		eif2b1	A0A498MSF0
orc5	A0A498LS24		etf1	A0A498MQY2		prkag1	A0A498LH41		gmppb	A0A498M3E5		plxna4	A0A498M9K4		mat2b	A0A498LGG2		txndc17	A0A498LEU3		rbks	A0A498MFU8		bysl	A0A498MP79		ugt1a1	A0A498NDU4		hdlbp	A0A498LCI4		rabl3	A0A498NCW8		KATNAL1	A0A498M7J9		kiaa0368	A0A498N963		fnta	A0A498NBL9
rps16	A0A498LS35		ELMO3	A0A498MR31		psmb6	A0A498LJQ3		npepl1	A0A498MZQ6		plxnb2	A0A498LIG6		rap2a	A0A498LG39		fkbp2	A0A498N4H0		gpd1l	A0A498LFE6		itpr1	A0A498NQL6		atp5j2	A0A498M8D4		cluh	A0A498LHF1		ctsz	A0A498LKT3		cyfip2	A0A498LTV0		parp1	A0A498LGP1		acadsb	A0A498LMG7
frmd6	A0A498LS50		phgdh	A0A498MR33		ahnak	A0A498NTE8		exosc4	A0A498N898		cul4a	A0A498MHW2		capza1	A0A498MN53		SH3BGRL	A0A498LJ34		tsta3	A0A498NTX3		yars	A0A498N049		mpc2	A0A498NAY0		ephx2	A0A498NP55		mtx2	A0A498NNV7		wdr18	A0A498NJJ6		AP3B1	A0A498M1W5		txndc9	A0A498NWS8
trabd	A0A498LS70		pdcd6	A0A498MR44		tardbp	A0A498LTK5		edf1	A0A498LRJ3		vil1	A0A498LRR3		flii	A0A498LDS4		mif	A0A498LWI4		tmem30a	A0A498M1P6		tmed9	A0A498NTD8		CYTB	V5XVB7		uggt1	A0A498NGH7		rps10	A0A498LD02		eif2a	A0A498NTQ4		ero1l	A0A498LKD0		rcc1	A0A498L913
pawr	A0A498LS91		r3hcc1	A0A498MR57		setd1a	A0A498NPK0		myh7b	A0A498MFA4		stxbp2	A0A498L8H8		ELOA	A0A498MX46		C19orf70	A0A498NH70		itgav	A0A498N1H6		ik	A0A498NA94		CDC42BPA	A0A498LDK7		aox1	A0A498MB87		mrpl22	A0A498LV29		skiv2l2	A0A498MEF2		COQ7	A0A498L9L3		HOMER2	A0A498MAW9
entpd5	A0A498LS96		arpc4	A0A498MR69		uba5	A0A498NDZ0		crabp1	A0A498LAL7		gad2	A0A498LWD9		nek7	A0A498MQR6		col6a6	A0A498LVS1		ampd1	A0A498LYA9		dnph1	A0A498MLG0		kif1a	A0A498MDU7		erc1	A0A498MPE0		cpeb1	A0A498M8V5		taok2	A0A498MM58		col12a1	A0A498M2L1		tmed9	A0A498NTD8
prkcd	A0A498L5W8		inhbb	A0A498MRJ3		raph1	A0A498N5N9		pcyt2	A0A498N8I4		TTN	A0A498NZ39		celf1	A0A498MDW1		col6a1	A0A498NRY6		kctd8	A0A498N8G3		polr1c	A0A498MYZ9		ppfibp1	A0A498LV52		aldh4a1	A0A498LXF0		lrpprc	A0A498N968		aacs	A0A498NG73		stk26	A0A498N9U1		lmo7	A0A498MEA4
prkcq	A0A498LHZ9		serpine2	A0A498MRK0		gipc1	A0A498MKT8		plek2	A0A498LR71		gas7	A0A498NHR7		tpp1	A0A498M886		tf	A0A498N853		lamb2	A0A498L2K9		usp5	A0A498N1H3		ap2s1	A0A498M0T3		acadsb	A0A498LMG7		adck3	A0A498LD68		trip11	A0A498LYY9		pitrm1	A0A498L3Z8		timm8b	A0A498LTE7
prkce	A0A498LSA7		tmem65	A0A498MRK4		dlg4	A0A498LP01		gmpr	A0A498MVQ2		dcn	A0A498M9M2		fxr2	A0A498MYT5		dlg5	A0A498LL74		dym	A0A498NRL9		trove2	A0A498N4K4		dnm2	A0A498M3Y7		gcdh	A0A498NU21		tmlhe	A0A498NC20		ada	A0A498MY71		git1	A0A498LQL3		ntmt1	A0A498LY72
vat1l	A0A498ME27		wdfy1	A0A498MRK7		mut	A0A498N3E3		pah	A0A498M9N5		epn2	A0A498LCD7		mrpl16	A0A498MB56		hspg2	A0A498LVR7		dhrs12	A0A498N7U4		snx5	A0A498LQ72		uroc1	A0A498LEI0		SLC25A22	A0A498LZI8		ergic1	A0A498MW07		bysl	A0A498MP79		tdrd3	A0A498LJ59		ndufa12	A0A498L9Q3
prkca	A0A498MTD2		EIF3C	A0A498MRL6		arvcf	A0A498NK53		dbt	A0A498NZ94		epn3	A0A498NZ28		ddx20	A0A498MBX9		PHKA2	A0A498NR97		mfn2	A0A498LZ42		pin4	A0A498NU90		kiaa1033	A0A498MJR1		csnk1a1	A0A498NCK2		emc3	A0A498L630		trip12	A0A498MF43		eif2a	A0A498NTQ4		lhpp	A0A498LNX9
prkcb	A0A498NMH1		WNK4	A0A498MRM3		dctn4	A0A498LYU8		RPS6KA2	A0A498N7E2		ppp2r5a	A0A498NFZ8		stam2	A0A498NI83		dcn	A0A498M9M2		mfn1	A0A498MRK5		hm13	A0A498LEV3		GNAZ	A0A498MXC9		chmp1a	A0A498M640		rnf103	A0A498MV71		kpna1	A0A498NRI9		ddx20	A0A498MBX9		srprb	A0A498M7U4
MARC2	A0A498LSC4		pmp2	A0A498MRU3		gmps	A0A498LQI3		ap3m1	A0A498NZ89		rs1	A0A498NQS5		dicer1	A0A498LLS1		postn	A0A498LEZ7		thop1	A0A498LQ71		fermt1	A0A498MUZ9		manf	A0A498MIU3		RMDN1	A0A498MCU4		cstf1	A0A498MJ92		prpf6	A0A498NW67		taok2	A0A498MM58		rpia	A0A498MZ96
npc2	A0A498LSC6		ostf1	A0A498MRW3		dnaja2	A0A498ME23		ap3m2	A0A498NGD5		bbs7	A0A498N8E8		cttn	A0A498LTW8		tgfbi	A0A498NUS4		lgi1	A0A498LX10		st13	A0A498NMR0		sgpl1	A0A498MUV0		tmed4	A0A498LFE7		snap91	A0A498NIL3		ddx23	A0A498NGG1		mars	A0A498NF02		psph	A0A498M0I8
selenoo	A0A498LSC7		napb	A0A498MS39		efhd1	A0A498L9R3		sod1	A0A498LF02		sesn2	A0A498N280		galnt7	A0A498LGC3		aldh4a1	A0A498LXF0		psmb2	A0A498MZP1		ugdh	A0A498N1B2		akap10	A0A498MS40		mtx2	A0A498NNV7		ugt1a1	A0A498NDU4		eif4h	A0A498M1G8		elmo1	A0A498N309		bag1	A0A498MKQ1
coq6	A0A498LSD3		akap10	A0A498MS40		efhd2	A0A498LP25		chuk	A0A498NDH5		nprl3	A0A498NFT9		myo6	A0A498MBZ1		fubp3	A0A498MUZ4		me3	A0A498NAP3		ctnnd1	A0A498MKM0		lrba	A0A498N1F6		rtn1	A0A498M5S4		fdxr	A0A498LLL7		polr1c	A0A498MYZ9		trip11	A0A498LYY9		plgrkt	A0A498MFA2
ktn1	A0A498LSE6		COPS6	A0A498MS62		mvp	A0A498LX76		bud31	A0A498L5I4		dclk2	A0A498LNZ0		PMM1	A0A498MHX8		lum	A0A498ML95		htra1	A0A498NE24		nnt	A0A498N8P1		nbea	A0A498LCP9		rtn3	A0A498LGC7		sumf2	A0A498MYL6		usp5	A0A498N1H3		ada	A0A498MY71		thop1	A0A498LQ71
cdk5rap3	A0A498LSG3		TMEM128	A0A498MS72		snx12	A0A498LH99		hibch	A0A498NHU6		stk3	A0A498N086		PLEKHO2	A0A498ND87		adsl	A0A498MZR2		HTRA2	A0A498MYC4		gys1	A0A498LZL8		rgn	A0A498NNC6		rpl18	A0A498NPB6		ufd1l	A0A498LLT9		snx5	A0A498LQ72		bysl	A0A498MP79		LGALS3	A0A498LH57
serpini1	A0A498LSH3		map1s	A0A498MS83		myo1c	A0A498LHU8		ppig	A0A498NT95		gsn	A0A498NKF8		mrto4	A0A498LVI3		shmt2	A0A498N951		sec13	A0A498MAC6		gys2	A0A498MD49		gne	A0A498MC65		cpeb1	A0A498M8V5		mpc2	A0A498NAY0		acsl6	A0A498MEQ1		tubgcp3	A0A498NJZ3		lama4	A0A498M9X2
thnsl2	A0A498LSH5		cse1l	A0A498MSB4		nfyc	A0A498MZI8		cask	A0A498NCV6		myom2	A0A498N3K3		rangap1	A0A498LRL2		polr1a	A0A498N4E6		bdh1	A0A498LTZ8		c3	A0A498MKU4		cmpk1	A0A498N071		ndufa7	A0A498LW32		CYTB	V5XVB7		scp2	A0A498M8P4		yars	A0A498N049		mob2	A0A498LCZ3
plek	A0A498LSI8		eif2b1	A0A498MSF0		araf	A0A498L271		pabpn1	A0A498N001		DCX	A0A498NMA4		mapk14	A0A498NV34		pdia6	A0A498LDE8		wdr61	A0A498LAT7		hdlbp	A0A498LCI4		qars	A0A498LZ02		mccc1	A0A498MVF3		slc25a21	A0A498LQR8		acaa1	A0A498LP08		snw1	A0A498NLB3		sorbs2	A0A498MUC4
DDX58	A0A498LSJ5		map1lc3a	A0A498MSG3		braf	A0A498MF96		rae1	A0A498N8H1		crat	A0A498MJ07		mylk	A0A498LFS7		RGPD5	A0A498MYX9		cryl1	A0A498MAL2		cluh	A0A498LHF1		pter	A0A498NZP2		lrpprc	A0A498N968		rock2	A0A498LQC0		pin4	A0A498NU90		prkaa1	A0A498LRJ7		phospho2	A0A498NRW8
tdrd1	A0A498LSJ7		rpl22	A0A498MSK2		nefl	A0A498MI91		cse1l	A0A498MSB4		grk7	A0A498N0S4		mapk12	A0A498LTL2		wbscr17	A0A498L6I4		bccip	A0A498LU12		ephx2	A0A498NP55		hbs1l	A0A498MLX6		adck3	A0A498LD68		ppfibp1	A0A498LV52		lonp2	A0A498MHA9		imp3	A0A498N7M9		ndufa2	A0A498NC16
ca10	A0A498LSM0		SPIDR	A0A498MSK4		NRXN3	A0A498LMQ8		map4k4	A0A498MQ09		timm44	A0A498MVI3		ganab	A0A498N589		txndc5	A0A498NBH4		usp14	A0A498N6B6		myo1e	A0A498L7R8		yars	A0A498N049		mrpl15	A0A498MA95		ap2s1	A0A498M0T3		hm13	A0A498LEV3		ddx23	A0A498NGG1		optc	A0A498MSQ5
srsf2	A0A498LSM2		prelp	A0A498MSP0		amylase	A0A498N5K0		mink1	A0A498N4C9		glrx3	A0A498LFT5		SMG9	A0A498LXX1		adss	A0A498LEX5		nhp2l1	A0A498NAK3		ufl1	A0A498MAA7		cpne4	A0A498N0M0		rnf103	A0A498MV71		GNAZ	A0A498MXC9		abcb1	A0A498N7F2		mgea5	A0A498NBS6		cacna2d1	A0A498NXN0
clvs2	A0A498LSN1		specc1	A0A498MSP8		iqsec2	A0A498MLH6		bin2	A0A498LAU9		acsl1	A0A498LDW3		pdlim7	A0A498N7X2		tmod4	A0A498NIP2		vps45	A0A498NAP9		srp68	A0A498ME85		CPNE7	A0A498NJ35		ugt1a1	A0A498NDU4		gusb	A0A498P2N1		fermt3	A0A498N227		polr1c	A0A498MYZ9		DPEP3	A0A498MN92
pxn	A0A498LSP3		optc	A0A498MSQ5		ist1	A0A498ME94		smarcd1	A0A498NID7		nid2	A0A498LTT6		arfgef2	A0A498L8D0		hnrnpa1	A0A498LSH0		pgm3	A0A498N0K6		pcca	A0A498L3R2		NLRC5	A0A498MFX3		timm9	A0A498MZJ9		jakmip2	A0A498N6P6		fermt1	A0A498MUZ9		usp5	A0A498N1H3		TPPP2	A0A498LIE2
qki	A0A498MKM2		ndufa5	A0A498MSQ9		MAP3K15	A0A498M9V9		polr2e	A0A498NNF7		cbr1	A0A498NJN0		snx6	A0A498MDJ5		myoz1	A0A498N7V3		ndufa6	A0A498MHB9		aldh4a1	A0A498LXF0		cab39l	A0A498NJV9		CYTB	V5XVB7		akap10	A0A498MS40		hdlbp	A0A498LCI4		pin4	A0A498NU90		mical3	A0A498MY34
arih2	A0A498LST9		pbdc1	A0A498MSR1		cpeb4	A0A498NTA6		RAP1GDS1	A0A498NIT8		soga3	A0A498LX81		mfn1	A0A498MRK5		pdlim7	A0A498N3Z6		ddx47	A0A498L5B4		pdia5	A0A498NHN2		raly	A0A498LMG1		faf2	A0A498NEQ6		lrba	A0A498N1F6		st13	A0A498NMR0		prep	A0A498NK12		unc45a	A0A498MT24
nab2	A0A498LSV1		EML4	A0A498MSR7		cpeb3	A0A498LUK4		prmt5	A0A498NGI1		vps16	A0A498NNY5		atl2	A0A498MSY1		bag6	A0A498MCG5		rdh12	A0A498LUW8		samm50	A0A498LMW5		pdlim7	A0A498N7X2		rock2	A0A498LQC0		pah	A0A498M9N5		TPP2	A0A498M7L0		st13	A0A498NMR0		nid1	A0A498LVN4
apoe	A0A498LT17		epcam	A0A498MSX6		ptpn11	A0A498NBW8		ddc	A0A498LCB0		RYR2	A0A498LMF6		dnm2	A0A498M3Y7		pcna	A0A498MYE6		fdxr	A0A498LLL7		acadsb	A0A498LMG7		serpinh1	A0A498LQN4		ppfibp1	A0A498LV52		ftcd	A0A498LNN9		ctnnd1	A0A498MKM0		SLC39A3	A0A498MYF6		cast	A0A498LJR2
psmd14	A0A498LT27		MAT1A	A0A498MSY9		trappc3	A0A498MH32		mesdc2	A0A498MYN3		elavl4	A0A498NS54		mrps9	A0A498NPH4		pgam2	A0A498N416		eya3	A0A498MNH3		STARD10	A0A498MIP6		top2b	A0A498LY18		gnaq	A0A498MB94		hal	A0A498MW23		casp3	A0A498N149		TPP2	A0A498M7L0		col6a6	A0A498LQS3
gstm3	A0A498LT46		ckb	A0A498MSZ6		PLCB4	A0A498NTC0		rraga	A0A498MZL1		elavl2	A0A498NML0		csrp2	A0A498NZS0		pcca	A0A498L3R2		akt3	A0A498LUS8		csnk1a1	A0A498NCK2		ctnnbl1	A0A498NQE6		GNAZ	A0A498MXC9		dnm2	A0A498M3Y7		acsl5	A0A498LRL0		ugdh	A0A498N1B2		gstp1	A0A498NEU1
hdac6	A0A498LT47		DHRS2	A0A498MT19		plcb1	A0A498NTZ2		gbas	A0A498LR17		elavl3	A0A498MPM9		PFKL	A0A498M7R6		pabpn1	A0A498N001		l3mbtl1	A0A498MXA6		chmp1a	A0A498M640		ptpn11	A0A498NBW8		cask	A0A498NCV6		rgn	A0A498NNC6		acsl1	A0A498LDW3		mcm2	A0A498NLN5		btd	A0A498LYJ5
athl1	A0A498LT80		ap2b1	A0A498MT56		ATG7	A0A498NJK5		crip1	A0A498LGM3		PCYOX1L	A0A498LC68		get4	A0A498NRX9		rpl15	A0A498LVN5		pc	A0A498NTR3		tmed4	A0A498LFE7		akt3	A0A498LUS8		farsa	A0A498NUW6		blmh	A0A498LH75		nnt	A0A498N8P1		gfpt2	A0A498LPI3		gstz1	A0A498LVZ9
mecr	A0A498LT82		aco1	A0A498MTB1		thbs4	A0A498MP89		slc1a3	A0A498LXA3		arrb2	A0A498MMT3		fxr1	A0A498P5C7		spcs3	A0A498LC14		nudt2	A0A498M1G4		ctsz	A0A498LKT3		RAP1GDS1	A0A498NIT8		akap10	A0A498MS40		cmpk1	A0A498N071		hoga1	A0A498MAV9		ctnnd1	A0A498MKM0		bcap29	A0A498NZ72
ndor1	A0A498LT99		cdc42	A0A498MTB3		inpp4a	A0A498N732		AGO1	A0A498MHI7		anxa4	A0A498M537		fmr1	A0A498LNV6		banf1	A0A498MYH6		atp6v1c1	A0A498N769		mtx2	A0A498NNV7		usp14	A0A498N6B6		dnm2	A0A498M3Y7		qars	A0A498LZ02		atp13a1	A0A498N9S3		ttll12	A0A498P2L1		sfxn3	A0A498MZB8
smpdl3b	A0A498LTC9		ctnna2	A0A498MTB9		snap25	A0A498N2T2		AGO3	A0A498M6D2		calcoco2	A0A498LCL9		emc2	A0A498LFR4		hint1	A0A498LW95		prkca	A0A498MTD2		manf	A0A498MIU3		fnta	A0A498NBL9		rgn	A0A498NNC6		pter	A0A498NZP2		gys2	A0A498MD49		acsl1	A0A498LDW3		GCA	A0A498NPI3
REEP1	A0A498LTD4		prkca	A0A498MTD2		MAT1A	A0A498MSY9		AGO2	A0A498MVZ4		sh3kbp1	A0A498MIB9		vta1	A0A498LDA8		rpl22l1	A0A498MCU8		camsap1	A0A498MWU8		rtn1	A0A498M5S4		FBN3	A0A498MW06		MAT1A	A0A498MSY9		hbs1l	A0A498MLX6		gys1	A0A498LZL8		acsl5	A0A498LRL0		gnmt	A0A498LU93
copz1	A0A498LTD9		rhebl1	A0A498MTE3		plch2	A0A498LWN1		AGO4	A0A498N3A3		arhgdia	A0A498LI33		nop16	A0A498LQF8		cfl2	A0A498MQK3		nt5dc2	A0A498N2V7		rtn3	A0A498LGC7		dcxr	A0A498NAW3		cmpk1	A0A498N071		CPNE7	A0A498NJ35		tram1	A0A498N3X2		nnt	A0A498N8P1		abhd14b	A0A498L5N4
timm8b	A0A498LTE7		rab12	A0A498MTM6		hadhb	A0A498NK83		fhl5	A0A498LMN9		capza1	A0A498MN53		hid1	A0A498LU33		zmiz2	A0A498N9I9		arih2	A0A498LST9		rps10	A0A498LD02		esyt1	A0A498P1N8		pter	A0A498NZP2		CPNE4	A0A498NKD7		ephx2	A0A498NP55		gys1	A0A498LZL8		ethe1	A0A498LA32
thap4	A0A498LTF9		ptx3	A0A498MTN1		rpl32	A0A498MLZ6		fhl3	A0A498NIJ0		anxa1	A0A498NJQ3		srsf9	A0A498MHG4		strap	A0A498M9M9		plbd1	A0A498M7Q3		ndufa7	A0A498LW32		xrcc5	A0A498MC33		pebp1	A0A498NG47		NLRC5	A0A498MFX3		aox1	A0A498MB87		gys2	A0A498MD49		ttc25	A0A498LWD3
syt1	A0A498LTH2		ppp1r10	A0A498MTQ7		sgip1	A0A498NUD8		ubqln4	A0A498NQC9		lctl	A0A498MMK7		ik	A0A498NA94		nans	A0A498MGP0		gipc1	A0A498MKT8		MTFP1	A0A498LWV6		ptprc	A0A498NTG3		cpne4	A0A498N0M0		ostf1	A0A498MRW3		aass	A0A498MD26		sec23b	A0A498N4Q4		pycrl	A0A498NTF0
syt7	A0A498M0C1		ITIH4	A0A498MTS8		snx4	A0A498NHT1		gmppa	A0A498NPA3		nt5e	A0A498MGU6		snx4	A0A498NHT1		dctn2	A0A498NC63		gipc2	A0A498NT68		lrpprc	A0A498N968		rae1	A0A498N8H1		CPNE7	A0A498NJ35		ugdh	A0A498N1B2		erc1	A0A498MPE0		snx5	A0A498LQ72		uchl1	A0A498MUF4
tardbp	A0A498LTK5		dyrk4	A0A498MTT4		serpinb1	A0A498NBE7		HPCAL1	A0A498LDM3		leprel2	A0A498N527		rraga	A0A498MZL1		dnaja2	A0A498ME23		tom1l2	A0A498LC95		adck3	A0A498LD68		pdcd6	A0A498MR44		NLRC5	A0A498MFX3		csrp2	A0A498NZS0		fah	A0A498NA62		hdlbp	A0A498LCI4		reep5	A0A498M3F5
spcs2	A0A498LTL5		atad2	A0A498MTZ4		serpinc1	A0A498MH64		ncald	A0A498LGU7		lgals8	A0A498M7S6		PLCB4	A0A498NTC0		ruvbl1	A0A498L6Q9		epn2	A0A498LCD7		tmlhe	A0A498NC20		mat2b	A0A498LGG2		ostf1	A0A498MRW3		vasp	A0A498MD67		ufl1	A0A498MAA7		ephx2	A0A498NP55		hapln1	A0A498NQ29
nup107	A0A498LTM5		prss16	A0A498MU91		unc13a	A0A498NGZ1		rbks	A0A498MFU8		grifin	A0A498MGJ7		casp3	A0A498N149		pkd1l1	A0A498LFD6		epn3	A0A498NZ28		emc3	A0A498L630		parva	A0A498M9A8		parp1	A0A498LGP1		pdlim7	A0A498N7X2		gpam	A0A498LMX6		aox1	A0A498MB87		pbld	A0A498N6F0
ide	A0A498LTM7		gpi	A0A498MUB2		ELMO2	A0A498NJ23		tnni1	A0A498MJC0		akt2	A0A498MFH8		casp7	A0A498LWI8		emid1	A0A498NJN8		ppp2r5a	A0A498NFZ8		OGDHL	A0A498MQY5		rap2a	A0A498LG39		hgs	A0A498L6D4		slc16a9	A0A498LQI4		dhtkd1	A0A498MTD0		erc1	A0A498MPE0		KIF25	A0A498MHB2
ror2	A0A498LTN0		sorbs2	A0A498MUC4		cadps	A0A498L6R9		myl10	A0A498N5U9		padi2	A0A498LR20		pdia6	A0A498LDE8		hspa4	A0A498NTF6		fam63a	A0A498M7K8		sec24d	A0A498NJ66		tnnc2	A0A498N0H1		slc16a9	A0A498LQI4		nck2	A0A498M8A4		srp68	A0A498ME85		pcca	A0A498L3R2		ND1	H9C4W4
ube2v1	A0A498LTN4		capzb	A0A498MUC6		GFOD1	A0A498M209		purg	A0A498LUM9		adh5	A0A498MXR4		txndc5	A0A498NBH4		parp1	A0A498LGP1		ykt6	A0A498N3I9		rnf103	A0A498MV71		gpn3	A0A498NKJ5		SEC24B	A0A498N838		nck1	A0A498M3P0		pcca	A0A498L3R2		ndufs1	A0A498NNW4		C6orf58	A0A498LD72
reln	A0A498LTQ3		uchl1	A0A498MUF4		HTRA2	A0A498MYC4		tsta3	A0A498NTX3		atp1b4	A0A498LPV3		pgam5	A0A498NGG7		gyg1	A0A498P2U5		nprl3	A0A498NFT9		ugt1a1	A0A498NDU4		ELOA	A0A498MX46		sf3a2	A0A498MZH9		sf3a2	A0A498MZH9		aldh4a1	A0A498LXF0		scfd1	A0A498MN03		chuk	A0A498NDH5
col9a1	A0A498LTR0		echs1	A0A498MUH8		cask	A0A498NDR7		tmem30a	A0A498M1P6		snx7	A0A498NDM4		znf622	A0A498NRU8		txndc12	A0A498NUQ3		cpeb1	A0A498M8V5		atp5j2	A0A498M8D4		dpyd	A0A498NE23		igf2bp1	A0A498MU51		ctnnbl1	A0A498NQE6		pdia5	A0A498NHN2		aldh4a1	A0A498LXF0		macrod1	A0A498N1A7
wrn	A0A498LTT0		polr2h	A0A498MUI6		suclg2	A0A498MPS1		SNTB2	A0A498NEB7		foxk1	A0A498L533		lrba	A0A498N1F6		mesdc2	A0A498MYN3		mri1	A0A498N520		mpc2	A0A498NAY0		stk10	A0A498N8G4		ptpn11	A0A498NBW8		stk26	A0A498N9U1		acadsb	A0A498LMG7		ndufv1	A0A498LWS5		ndufa5	A0A498MSQ9
hace1	A0A498LRP6		hp1bp3	A0A498MUK5		OPLAH	A0A498NLG1		adk	A0A498N453		oxct1	A0A498MG85		zpr1	A0A498LUF5		DCX	A0A498NMA4		acsl1	A0A498LDW3		CYTB	V5XVB7		mx1	A0A498MHV8		tollip	A0A498MVA6		ptpn11	A0A498NBW8		hao1	A0A498MC15		acadsb	A0A498LMG7		glrx	A0A498LZX5
golgb1	A0A498LSD8		itih3	A0A498MUL6		vwa8	A0A498MMG3		TTN	A0A498NZ39		grpel1	A0A498MDZ5		vars	A0A498LBP2		cfi	A0A498LLL2		nid2	A0A498LTT6		DOCK1	A0A498MJH4		cryz	A0A498P4F6		adprhl1	A0A498M7H3		rtca	A0A498MM56		gcdh	A0A498NNP0		STARD10	A0A498MIP6		heatr1	A0A498N9B6
magi2	A0A498LTF4		paics	A0A498MUQ6		echs1	A0A498MUH8		lamb2	A0A498L2K9		pvalb	A0A498LE30		C11orf54	A0A498N1E7		bgn	A0A498LBF9		cbr1	A0A498NJN0		rock2	A0A498LQC0		CALD1	A0A498MUT6		slc4a4	A0A498L573		adi1	A0A498N2V1		acox1	A0A498M7H7		mtx2	A0A498NNV7		gstk1	A0A498NIZ5
nid2	A0A498LTT6		CALD1	A0A498MUT6		oxct1	A0A498MG85		abcc9	A0A498MFD9		arvcf	A0A498NK53		mtx1	A0A498MNT9		kera	A0A498MFI8		mprip	A0A498L463		ppfibp1	A0A498LV52		u2af1	A0A498LY45		akt1	A0A498NSQ3		csnk1a1	A0A498NCK2		eci2	A0A498LYJ3		rps10	A0A498LD02		pfn1	A0A498LJP3
smurf2	A0A498MEG6		kng1	A0A498MUT8		aldh6a1	A0A498M1U7		HOMER2	A0A498MAW9		hsd17b12	A0A498MW42		dctn1	A0A498LGX9		c9	A0A498LPL8		thoc7	A0A498LFQ3		march5	A0A498LYJ7		chmp2a	A0A498LNM5		akt3	A0A498LUS8		lrp2	A0A498NXD0		SLC25A22	A0A498LZI8		chp1	A0A498LVS8		rbbp9	A0A498LZI5
NEDD4	A0A498MXN5		sgpl1	A0A498MUV0		hmgcl	A0A498NCN4		homer1	A0A498MIQ6		vamp1	A0A498LKF6		SEPT12	A0A498N0P4		fgg	A0A498LEH5		hapln3	A0A498MJW1		ap1s2	A0A498NJR7		tagln3	A0A498NRS5		myo7a	A0A498NUD1		slc4a4	A0A498L573		STARD10	A0A498MIP6		cpeb1	A0A498M8V5		NDUFC2	A0A498MXI2
wwp2	A0A498NYE1		psmd1	A0A498MUW2		gpx1	A0A498L6S7		thop1	A0A498LQ71		DGKG	A0A498NM25		dnajb11	A0A498NEV1		prelp	A0A498MSP0		hapln1	A0A498NQ29		B4GALT1	A0A498N8B1		ube2h	A0A498ML75		map6	A0A498L7R2		akt1	A0A498NSQ3		slc25a20	A0A498MA61		ssbp1	A0A498MN52		aimp2	A0A498NC19
TTN	A0A498NZ39		ADAMTSL3	A0A498MUX8		ldhd	A0A498MUN0		lgi1	A0A498LX10		nans	A0A498MGP0		ccdc93	A0A498NHS7		hgd	A0A498N1P6		rnf103	A0A498MV71		GNAZ	A0A498MXC9		aldh18a1	A0A498LMW6		cpn1	A0A498LNK8		akt3	A0A498LUS8		htatip2	A0A498M812		mtor	A0A498LVU3		dync1i2	A0A498LP67
fh	A0A498LTT9		fubp3	A0A498MUZ4		sar1b	A0A498LDZ5		psmb2	A0A498MZP1		KCTD12	A0A498LBV4		npepl1	A0A498MZQ6		calr3	A0A498MMJ7		sdcbp	A0A498LUF9		gnaq	A0A498MB94		csrp2	A0A498NZS0		tie1	A0A498NV48		crybb2	A0A498P1P5		chmp1a	A0A498M640		uggt1	A0A498NGH7		lama2	A0A498P6D3
fabp7	A0A498LTJ0		fermt1	A0A498MUZ9		ivd	A0A498MHV3		me1	A0A498NJ16		pls1	A0A498NV44		AP3S1	A0A498NA52		sorbs1	A0A498N6L4		SNTB2	A0A498NEB7		akap10	A0A498MS40		tmod3	A0A498N4C6		GCA	A0A498NPI3		GCA	A0A498NPI3		gch1	A0A498LLF2		lrpprc	A0A498N968		lta4h	A0A498N9T1
pmp2	A0A498MRU3		hspa5	A0A498MV04		sardh	A0A498MXH8		me3	A0A498NAP3		snx8	A0A498M9Z7		exosc4	A0A498N898		plg	A0A498MP37		micu1	A0A498MZZ5		pi4k2a	A0A498LLY9		wdr61	A0A498LAT7		sri	A0A498LG84		sri	A0A498LG84		RMDN1	A0A498MCU4		erc2	A0A498MRQ2		WDR1	A0A498MPH1
fabp3	A0A498MWH4		srsf3	A0A498MV30		ncald	A0A498LGU7		rpl22l1	A0A498MCU8		pdlim1	A0A498NZA9		myh7b	A0A498MFA4		agt	A0A498N0U2		ptgs1	A0A498N183		nbea	A0A498LCP9		shoc2	A0A498LHG9		PLCB4	A0A498NTC0		tnr	A0A498MHK0		tmed4	A0A498LFE7		adck3	A0A498LD68		synm	A0A498MEK4
prx	A0A498NNA6		gnb2	A0A498MV49		HPCAL1	A0A498LDM3		aldh4a1	A0A498LXF0		phkb	A0A498M8P5		me1	A0A498NJ16		me3	A0A498NAP3		anxa1	A0A498NJQ3		lrba	A0A498N1F6		epb41	A0A498NQS7		gpm6a	A0A498LGQ1		gpm6a	A0A498LGQ1		rabl3	A0A498NCW8		sec24d	A0A498NJ66		apex1	A0A498MXE5
derl1	A0A498LTV6		rnf103	A0A498MV71		hsd17b4	A0A498NEL9		sec13	A0A498MAC6		pdk1	A0A498LGU8		alad	A0A498MB86		TRIP10	A0A498L7Z4		padi2	A0A498LR20		dnm2	A0A498M3Y7		kif5c	A0A498N878		slc25a25	A0A498LQC1		crip1	A0A498LGM3		manf	A0A498MIU3		rnf103	A0A498MV71		MPST	A0A498NM22
PDPR	A0A498LTV8		rnf181	A0A498MV94		snx3	A0A498LKX7		cryl1	A0A498MAL2		aass	A0A498MD26		strn3	A0A498MVV8		angptl7	A0A498LVX8		pacs1	A0A498MS15		gne	A0A498MC65		fam171a1	A0A498NCE6		crip1	A0A498LGM3		thoc3	A0A498NUD0		rtn1	A0A498M5S4		cstf1	A0A498MJ92		apmap	A0A498NDS9
INPP1	A0A498LTV9		lsm12	A0A498MV98		msi1	A0A498LH33		abcb1	A0A498N7F2		gmps	A0A498LQI3		dbt	A0A498NZ94		hsd17b4	A0A498NEL9		rad21	A0A498MV43		MAT1A	A0A498MSY9		supt4h1	A0A498NKH8		RPS6KA2	A0A498N7E2		ptbp2	A0A498N0X0		rtn3	A0A498LGC7		srp72	A0A498N220		eci2	A0A498M2P5
acbd5	A0A498LTW2		tollip	A0A498MVA6		pmp2	A0A498MRU3		bccip	A0A498LU12		psmb3	A0A498MYG1		acot9	A0A498NT14		gabrd	A0A498M145		snx7	A0A498NDM4		qars	A0A498LZ02		dpp3	A0A498N600		sh3glb1	A0A498M723		syt1	A0A498LTH2		ssbp1	A0A498MN52		ugt1a1	A0A498NDU4		rbp4	A0A498LVA3
cttn	A0A498LTW8		rps6ka3	A0A498MVB5		fabp3	A0A498MWH4		usp14	A0A498N6B6		PHKA2	A0A498NR97		ndufaf5	A0A498LL35		auh	A0A498LUF6		tmod3	A0A498N4C6		pter	A0A498NZP2		dync1li2	A0A498LWA9		srl	A0A498MXC3		sf3b2	A0A498MJL5		ndufa7	A0A498LW32		fdxr	A0A498LLL7		nccrp1	A0A498LE53
apoc2	A0A498LTY2		upp1	A0A498MVF6		calb2	A0A498MBC2		nhp2l1	A0A498NAK3		hspa12b	A0A498NUL7		TOM1	A0A498NL76		clpp	A0A498N353		uckl1	A0A498NGD2		CPNE7	A0A498NJ35		mylk	A0A498LFS7		folh1b	A0A498MU97		esyt1	A0A498P1N8		MTFP1	A0A498LWV6		CYTB	V5XVB7		dcxr	A0A498NAW3
rars	A0A498LTZ7		ptp4a2	A0A498MVK7		epn1	A0A498N5R3		ndufa6	A0A498MHB9		clic1	A0A498MCJ8		ABCF3	A0A498NA79		coq10b	A0A498N7V9		sh3pxd2b	A0A498NCE2		CPNE4	A0A498NKD7		mapk12	A0A498LTL2		CALD1	A0A498MUT6		xrcc5	A0A498MC33		lrpprc	A0A498N968		arf6	A0A498NTC1		sdcbp	A0A498LUF9
bdh1	A0A498LTZ8		coch	A0A498MVT8		phyhipl	A0A498NAQ3		zmiz2	A0A498N9I9		clic2	A0A498LIJ7		acadvl	A0A498MKU0		acy1	A0A498N1Q7		nt5c3a	A0A498LIJ6		NLRC5	A0A498MFX3		ganab	A0A498N589		epb41	A0A498NQS7		ptprc	A0A498NTG3		adck3	A0A498LD68		kif1a	A0A498MDU7		sspn	A0A498MG06
ppp1r3g	A0A498LU08		tln2	A0A498MVU2		crmp1	A0A498MGP7		rdh12	A0A498LUW8		eml1	A0A498MHE1		sod1	A0A498LF02		rgn	A0A498NNC6		bmi1	A0A498LC72		ostf1	A0A498MRW3		plxnb2	A0A498LIG6		pptc7	A0A498MVX4		rae1	A0A498N8H1		acad11	A0A498N5W9		polr3a	A0A498LQF9		plch2	A0A498LWN1
gyg1	A0A498LU11		HOOK3	A0A498MVX2		acadl	A0A498N4S4		eya3	A0A498MNH3		adarb1	A0A498N2X6		acsl4	A0A498NUU4		rpia	A0A498MZ96		itga2	A0A498MMA0		snrnp40	A0A498MZK9		papola	A0A498MA91		ubtf	A0A498LZ18		ist1	A0A498ME94		ergic1	A0A498MW07		rock2	A0A498LQC0		ppp1r11	A0A498MG98
bccip	A0A498LU12		AGO2	A0A498MVZ4		dpys	A0A498L4W1		akt3	A0A498LUS8		nol6	A0A498MPA5		chuk	A0A498NDH5		GLOD5	A0A498N8L5		sptlc1	A0A498M3D1		csrp2	A0A498NZS0		EPB41L2	A0A498LCY6		RGPD5	A0A498MN61		pdcd6	A0A498MR44		mlec	A0A498MDW3		ppfibp1	A0A498LV52		atp5j	A0A498NZF5
SLIRP	A0A498LU32		arl3	A0A498MW00		PPP3CA	A0A498LYV6		akt2	A0A498MFH8		rtbdn	A0A498M645		sfxn2	A0A498LP20		tmod3	A0A498N4C6		stxbp2	A0A498L8H8		vasp	A0A498MD67		atl2	A0A498MSY1		hmgb2	A0A498LD75		mat2b	A0A498LGG2		emc3	A0A498L630		DHX36	A0A498MCU7		scp2	A0A498M8P4
hid1	A0A498LU33		tinagl1	A0A498MW04		map6	A0A498L7R2		l3mbtl1	A0A498MXA6		slc25a24	A0A498MBM2		ech1	A0A498NP92		snx5	A0A498LQ72		gsn	A0A498NKF8		kpna3	A0A498NKE3		RPS6KA2	A0A498N7E2		thoc3	A0A498NUD0		parva	A0A498M9A8		rnf103	A0A498MV71		gnaq	A0A498MB94		pls1	A0A498NV44
pno1	A0A498LU40		FBN3	A0A498MW06		nt5dc3	A0A498MJV1		akt1	A0A498NSQ3		postn	A0A498LEZ7		kpna2	A0A498MFH6		srsf9	A0A498MHG4		hsd17b12	A0A498MW42		slc16a9	A0A498LQI4		EML4	A0A498MSR7		erh	A0A498LGY3		edf1	A0A498N173		mfn2	A0A498LZ42		GNAZ	A0A498MXC9		tmod3	A0A498N4C6
pald1	A0A498LU52		ergic1	A0A498MW07		homer1	A0A498MIQ6		phyhipl	A0A498NAQ3		csad	A0A498LQM8		CXorf56	A0A498NEP4		rbp4	A0A498LVA3		snx8	A0A498M9Z7		ube2h	A0A498ML75		cbl	A0A498MQQ5		ptbp2	A0A498N0X0		rap2a	A0A498LG39		srp72	A0A498N220		farsa	A0A498NUW6		eif3g	A0A498L7T5
WWC1	A0A498LU65		psma2	A0A498MW39		hspa12a	A0A498P302		atp6v1c1	A0A498N769		gad1	A0A498P5D7		gins1	A0A498MSU7		arpc5	A0A498LDJ8		tmem214	A0A498LN85		ctnnbl1	A0A498NQE6		KCTD12	A0A498LBV4		esyt1	A0A498P1N8		evl	A0A498P4J4		ugt1a1	A0A498NDU4		akap10	A0A498MS40		aimp1	A0A498LLM0
gnmt	A0A498LU93		hsd17b12	A0A498MW42		pip5k1c	A0A498MV14		sdcbp	A0A498LUF9		pin1	A0A498NLG8		map4k4	A0A498MQ09		erap2	A0A498MIP9		pdlim1	A0A498NZA9		plekhf2	A0A498LFM9		stk3	A0A498N086		xrcc5	A0A498MC33		bin2	A0A498LAU9		fdxr	A0A498LLL7		ap2s1	A0A498M0T3		blvra	A0A498N0E6
coro1c	A0A498NGB7		rab35	A0A498MWD3		map1lc3a	A0A498MSG3		prkca	A0A498MTD2		sec31a	A0A498M2A4		mink1	A0A498N4C9		ganab	A0A498N589		adi1	A0A498N2V1		map1lc3b	A0A498LYC4		igf2r	A0A498MYB9		ptprc	A0A498NTG3		tnnc2	A0A498N0H1		atp5j2	A0A498M8D4		psmb3	A0A498MYG1		rnf114	A0A498MAL6
snph	A0A498LUA3		fabp3	A0A498MWH4		vat1l	A0A498ME27		nme4	A0A498NNX8		pdk4	A0A498N255		stau1	A0A498NZY2		galm	A0A498N834		pdk1	A0A498LGU8		rtca	A0A498MM56		cops3	A0A498N2D1		ist1	A0A498ME94		gpn3	A0A498NKJ5		mpc2	A0A498NAY0		tarbp2	A0A498LV30		ctsb	A0A498NV01
enoph1	A0A498LUE7		AHNAK2	A0A498MWM5		tollip	A0A498MVA6		mfap2	A0A498M8B4		actr10	A0A498NS30		stau2	A0A498N771		ak4	A0A498NVU3		GCA	A0A498NPI3		ntmt1	A0A498LY72		ndufa10	A0A498NBA5		mat2b	A0A498LGG2		ELOA	A0A498MX46		abcb6	A0A498N692		rgn	A0A498NNC6		psmb4	A0A498NBJ4
lgsn	A0A498LUF4		ppp2r1b	A0A498MWR2		gnb5	A0A498M0B2		arhgap35	A0A498LZX9		bpgm	A0A498M3Y5		wwp2	A0A498NYE1		qdpr	A0A498M4G6		smtn	A0A498MJ23		akt3	A0A498LUS8		twf1	A0A498NTA0		parvb	A0A498M273		flii	A0A498LDS4		CYTB	V5XVB7		gne	A0A498MC65		ndufs5	A0A498LDC1
zpr1	A0A498LUF5		NEDD4	A0A498MWR6		CYTH2	A0A498M5E2		vil1	A0A498LRR3		hspa4	A0A498NTF6		sptlc1	A0A498M3D1		gstz1	A0A498LVZ9		ELMO3	A0A498MR31		akt1	A0A498NSQ3		rbm39	A0A498MJ42		parva	A0A498M9A8		polr2b	A0A498NA51		mlycd	A0A498N2K8		cmpk1	A0A498N071		npc2	A0A498LSC6
auh	A0A498LUF6		vim	A0A498MWX7		hpcal4	A0A498P3S4		rars	A0A498LTZ7		nrcam	A0A498MM02		parva	A0A498M9A8		gcdh	A0A498NNP0		clic1	A0A498MCJ8		myo7a	A0A498NUD1		mapk8ip3	A0A498M6J7		FAM49B	A0A498N1Q0		nek7	A0A498MQR6		rock2	A0A498LQC0		pter	A0A498NZP2		atp5d	A0A498MGL5
stx16	A0A498LUG9		gmds	A0A498MX26		napb	A0A498MS39		sesn2	A0A498N280		ncam1	A0A498NDY6		pdhx	A0A498M637		spcs2	A0A498LTL5		clic2	A0A498LIJ7		sri	A0A498LG84		slc12a2	A0A498M441		rap2a	A0A498LG39		CTBP2	A0A498LLX7		ppfibp1	A0A498LV52		cpne4	A0A498N0M0		ndufb8	A0A498LKL7
osbpl7	A0A498LPU9		PRKAB2	A0A498MX45		tom1l2	A0A498LC95		rimkla	A0A498MHT7		prrt2	A0A498LBU4		esrp2	A0A498MJ08		myoz2	A0A498NJH4		slc25a24	A0A498MBM2		GCA	A0A498NPI3		slc12a1	A0A498MB35		adam10	A0A498LCA1		celf1	A0A498MDW1		man2a1	A0A498MKN3		CPNE7	A0A498NJ35		ykt6	A0A498N3I9
ace	A0A498LUH0		ELOA	A0A498MX46		arl3	A0A498MW00		GCA	A0A498NPI3		cntn1	A0A498MKH5		mesdc2	A0A498MYN3		pcmt1	A0A498MN94		hyou1	A0A498LY34		ogt	A0A498MSU8		pkd1l1	A0A498LFD6		tnnc2	A0A498N0H1		cse1l	A0A498MSB4		pmpca	A0A498N1I4		NLRC5	A0A498MFX3		ndufb7	A0A498MI42
pex14	A0A498LUH5		eci1	A0A498MX93		kiaa0513	A0A498MEQ5		myom2	A0A498N3K3		cdh2	A0A498M627		gbas	A0A498LR17		tysnd1	A0A498MTV6		ERP27	A0A498NL60		RAP1GDS1	A0A498NIT8		AP3B1	A0A498M1W5		naa50	A0A498NT28		CNDP1	A0A498LAC0		kiaa1033	A0A498MJR1		wdr61	A0A498LAT7		MRPS36	A0A498NS37
hnrnpd	A0A498LTP4		cp	A0A498MX98		aldh1a3	A0A498MHF6		DCX	A0A498NMA4		TPP2	A0A498M7L0		cdc37	A0A498MDY1		akr1a1	A0A498NTT9		aldh4a1	A0A498LXF0		crip1	A0A498LGM3		acap2	A0A498NA53		gpn3	A0A498NKJ5		ccdc88c	A0A498LRY7		gnaq	A0A498MB94		rab24	A0A498M4I9		CLTB	A0A498N4R1
hnrnpdl	A0A498LUJ4		l3mbtl1	A0A498MXA6		aldh9a1	A0A498NRW6		acsl1	A0A498LDW3		cog2	A0A498N102		nup188	A0A498NR10		aldh18a1	A0A498LMW6		sart3	A0A498NGA8		fnta	A0A498NBL9		PLCB4	A0A498NTC0		ELOA	A0A498MX46		mx1	A0A498MHV8		GNAZ	A0A498MXC9		csrp2	A0A498NZS0		mettl7a	A0A498L8S6
zfyve28	A0A498LUL1		ywhah	A0A498MXB4		gpd1l	A0A498LFE6		cotl1	A0A498N767		slc23a3	A0A498N5F3		crnkl1	A0A498NKB1		dapl1	A0A498M7T0		lgals3bp	A0A498M3M0		srl	A0A498MXC3		casp7	A0A498LWI8		thoc2	A0A498N4Z9		gmppb	A0A498M3E5		gusb	A0A498P2N1		hkdc1	A0A498N424		bcam	A0A498LRE4
best2	A0A498LUM0		ACTN4	A0A498MXB9		cmpk1	A0A498N071		anxa4	A0A498M537		mgat4b	A0A498N4K6		phgdh	A0A498MR33		apoe	A0A498LT17		echdc2	A0A498MNP2		HOMER2	A0A498MAW9		casp3	A0A498N149		stk38	A0A498LP65		cryz	A0A498P4F6		farsa	A0A498NUW6		hk1	A0A498N0I6		C19orf66	A0A498N6Z3
SUGCT	A0A498LUQ9		apex1	A0A498MXE5		plcxd3	A0A498MEY9		sh3kbp1	A0A498MIB9		capn11	A0A498LZE6		prpf40a	A0A498LFV9		manf	A0A498MIU3		arl6ip5	A0A498N5E0		ubtf	A0A498LZ18		kif13b	A0A498LM25		pdp1	A0A498NFJ7		CALD1	A0A498MUT6		jakmip2	A0A498N6P6		hgs	A0A498L6D4		ada	A0A498MY71
gprc5b	A0A498LUR4		ak3	A0A498MXG2		me3	A0A498NAP3		polr2a	A0A498LS48		CAPN1	A0A498MPI7		slc1a3	A0A498LXA3		ada	A0A498MY71		rtn1	A0A498M998		RGPD5	A0A498MN61		pkmyt1	A0A498NLR2		pdcd6	A0A498MR44		chmp2a	A0A498LNM5		smarca4	A0A498MI78		slc16a9	A0A498LQI4		tsfm	A0A498L5Y4
taf5l	A0A498LUR8		NDUFC2	A0A498MXI2		mpp2	A0A498N429		RYR2	A0A498LMF6		pvrl1	A0A498M3K4		kif5c	A0A498NB35		alox5	A0A498MWJ2		bag6	A0A498MCG5		neb	A0A498N3Y5		hgs	A0A498L6D4		sept10	A0A498MAY9		smarca5	A0A498LMB5		sh3bp2	A0A498NER5		SEC24B	A0A498N838		SYNPO2	A0A498NJ38
tsc2	A0A498LUW6		arl15	A0A498MXK1		jakmip2	A0A498N6P6		mthfr	A0A498LZK0		scarb2	A0A498M7K2		fhl5	A0A498LMN9		ethe1	A0A498LA32		aifm1	A0A498NF81		adarb1	A0A498N2X6		acaca	A0A498M9R9		stk10	A0A498N8G4		ykt6	A0A498N3I9		akap10	A0A498MS40		serpinh1	A0A498LQN4		eml2	A0A498LHW8
spast	A0A498LUY0		anxa10	A0A498MXP6		CAMK1	A0A498LF47		arhgdia	A0A498LI33		syn1	A0A498MBU0		fhl3	A0A498NIJ0		nup93	A0A498MB05		TPP2	A0A498M7L0		ptbp2	A0A498N0X0		mut	A0A498N3E3		CNDP1	A0A498LAC0		cttn	A0A498LTW8		pi4k2a	A0A498LLY9		ctnnbl1	A0A498NQE6		nif3l1	A0A498N151
ppm1k	A0A498LV02		rpl9	A0A498MXQ4		map1lc3b	A0A498LYC4		ctsz	A0A498LKT3		stau2	A0A498N771		cmc1	A0A498L9Y5		apeh	A0A498MLK0		cog2	A0A498N102		sf3b2	A0A498MJL5		pck1	A0A498NC69		stk3	A0A498N086		snrnp70	A0A498NMP8		nbea	A0A498LCP9		elac2	A0A498M4Z4		BCKDHB	A0A498ME07
RPS3A	A0A498LV15		adh5	A0A498MXR4		prpf6	A0A498NW67		apex1	A0A498MXE5		VWA5A	A0A498MDM8		rabep1	A0A498NNF5		eif2a	A0A498NTQ4		hp1bp3	A0A498MUK5		esyt1	A0A498P1N8		pck2	A0A498N0Y6		ccdc88c	A0A498LRY7		prkag1	A0A498LH41		lrba	A0A498N1F6		ptpn11	A0A498NBW8		psmd12	A0A498MYH7
slc8a2	A0A498LV18		ttc9c	A0A498MXS1		adh5	A0A498MXR4		anxa1	A0A498NJQ3		ache	A0A498MQG7		sod2	A0A498LKV8		xrcc6	A0A498LGY5		mgat4b	A0A498N4K6		xrcc5	A0A498MC33		neb	A0A498N3Y5		mx1	A0A498MHV8		ik	A0A498NA94		ap2s1	A0A498M0T3		rtca	A0A498MM56		RMDN1	A0A498MCU4
slc8a1	A0A498NFB5		p3h1	A0A498MXX1		lancl2	A0A498LF21		padi2	A0A498LR20		FAM114A2	A0A498M1F3		gmppa	A0A498NPA3		rpa1	A0A498LHR7		c3	A0A498MDY3		ptprc	A0A498NTG3		srl	A0A498MXC3		cryz	A0A498P4F6		nudt3	A0A498L6E0		pah	A0A498M9N5		csnk1a1	A0A498NCK2		spcs1	A0A498LIS4
rbp7	A0A498LV21		plekhm2	A0A498MXX3		ccr9	A0A498N962		atp1b4	A0A498LPV3		ttc25	A0A498LWD3		dctn2	A0A498NC63		EIF3L	A0A498N9L1		capn11	A0A498LZE6		pdcd6	A0A498MR44		fbn1	A0A498M6Z5		PDPR	A0A498LTV8		tmod3	A0A498N4C6		ftcd	A0A498LNN9		pip4k2a	A0A498L6U4		tpk1	A0A498L766
ECE2	A0A498LV26		tat	A0A498MY15		akr1a1	A0A498NTT9		pacs1	A0A498MS15		eml2	A0A498LHW8		rdh14	A0A498N127		arcn1	A0A498N7H4		scarb2	A0A498M7K2		mat2b	A0A498LGG2		mybpc3	A0A498M8F9		chmp2a	A0A498LNM5		PMM1	A0A498MHX8		hal	A0A498MW23		akt1	A0A498NSQ3		tmem50a	A0A498LMZ1
mrpl22	A0A498LV29		copz2	A0A498MY19		chmp4b	A0A498N7K0		foxk1	A0A498L533		dctn4	A0A498LYU8		vrk3	A0A498MQK5		shbg	A0A498LBR0		prep	A0A498NK12		parva	A0A498M9A8		uggt1	A0A498NGH7		tagln3	A0A498NRS5		dhtkd1	A0A498MTD0		rgn	A0A498NNC6		akt3	A0A498LUS8		arl9	A0A498N6B9
tarbp2	A0A498LV30		rab4a	A0A498MY60		ppp1r11	A0A498MG98		oxct1	A0A498MG85		nptn	A0A498LK64		mcee	A0A498L6Z5		cstf1	A0A498MJ92		stau2	A0A498N771		rap2a	A0A498LG39		vars	A0A498LBP2		crnkl1	A0A498NKB1		syk	A0A498LUL2		gne	A0A498MC65		pkd1l1	A0A498LFD6		galns	A0A498ML35
ctsd	A0A498LV43		eif4a1	A0A498MY66		uggt1	A0A498NGH7		cnot3	A0A498NIT1		maob	A0A498N7T6		purg	A0A498LUM9		pip4k2a	A0A498L6U4		VWA5A	A0A498LRS0		evl	A0A498P4J4		arfgap3	A0A498L4B6		mapkapk2	A0A498MRD8		CAMK1	A0A498LF47		cmpk1	A0A498N071		myo7a	A0A498NUD1		crip1	A0A498LGM3
NAPSA	A0A498NLQ0		ada	A0A498MY71		cpt2	A0A498NR22		sh3pxd2b	A0A498NCE2		nae1	A0A498LY63		ND1	H9C4W4		glrx3	A0A498LFT5		ttc25	A0A498LWD3		adam10	A0A498LCA1		apoa1bp	A0A498M809		mrpl16	A0A498MB56		epb41	A0A498NQS7		pter	A0A498NZP2		crybb2	A0A498P1P5		pak2	A0A498MHP4
tmem38a	A0A498LV44		arpc2	A0A498MY97		txlna	A0A498LYA1		hapln1	A0A498NQ29		ndrg2	A0A498LFM0		hexa	A0A498MFZ0		twf1	A0A498NTA0		hspa12b	A0A498NUL7		tnnc2	A0A498N0H1		tmem214	A0A498LN85		dlg3	A0A498LL25		kif5c	A0A498N878		hbs1l	A0A498MLX6		dhrs13	A0A498LHI3		thyn1	A0A498LMI2
ppfibp1	A0A498LV52		rab30	A0A498MYA6		fabp7	A0A498LTJ0		hspa4	A0A498NTF6		bsg	A0A498NT52		osbp2	A0A498NJD9		sgpl1	A0A498MUV0		hspa12a	A0A498P302		gpn3	A0A498NKJ5		dctn1	A0A498LGX9		ykt6	A0A498N3I9		fam171a1	A0A498NCE6		cpne4	A0A498N0M0		tie1	A0A498NV48		zpr1	A0A498LUF5
pde6c	A0A498LV54		HTRA2	A0A498MYC4		rpl28	A0A498NGN3		pvalb	A0A498LE30		khdrbs1	A0A498LVV4		osbp	A0A498LL08		mlec	A0A498MDW3		TBC1D24	A0A498L1B2		ELOA	A0A498MX46		SEPT12	A0A498N0P4		fam91a1	A0A498N319		pxn	A0A498LSP3		CPNE7	A0A498NJ35		gnl2	A0A498LGP6		sypl2	A0A498NS18
pde6b	A0A498NC64		pcna	A0A498MYE6		timm44	A0A498MVI3		pfdn1	A0A498NYC1		coch	A0A498MVT8		tmem2	A0A498NJK3		FRG1	A0A498MUB4		maob	A0A498N7T6		stk3	A0A498N086		PLXNA2	A0A498ML38		plxnb2	A0A498LIG6		tbc1d1	A0A498L925		NLRC5	A0A498MFX3		jakmip2	A0A498N6P6		fahd2a	A0A498NL77
pde6a	A0A498NT55		tub	A0A498MYE8		vamp1	A0A498LKF6		nans	A0A498MGP0		dync1li1	A0A498MZQ8		c3	A0A498LT59		lactb2	A0A498NT66		dctn4	A0A498LYU8		flii	A0A498LDS4		plxna3	A0A498LT48		tmod3	A0A498N4C6		pgm2	A0A498N046		ostf1	A0A498MRW3		RAP1GDS1	A0A498NIT8		SCO1	A0A498MKC8
SUOX	A0A498LV72		apoa1	A0A498MYF5		rpl21	A0A498NSE5		dr1	A0A498M116		marcksl1	A0A498LYF0		wdr45	A0A498MS66		fkbp3	A0A498NTU1		khdrbs1	A0A498LVV4		DOCK2	A0A498N2G4		plxna4	A0A498M9K4		pip5k1c	A0A498MV14		mylk	A0A498NP17		cops5	A0A498MZ60		nudcd3	A0A498N0M1		c1qbp	A0A498NKL6
maea	A0A498LV80		SLC39A3	A0A498MYF6		ykt6	A0A498N3I9		kctd12	A0A498MFH0		sept5	A0A498LUE9		cadps	A0A498L6R9		wdr61	A0A498LAT7		crat	A0A498MJ07		thoc2	A0A498N4Z9		man1c1	A0A498M6B8		PMM1	A0A498MHX8		mapk12	A0A498LTL2		dcakd	A0A498L2H2		gemin5	A0A498LZ34		ppp2r4	A0A498LRM8
rbp4	A0A498LVA3		psmb3	A0A498MYG1		crabp1	A0A498LAL7		snx8	A0A498M9Z7		cops3	A0A498N2D1		hk1	A0A498N0I6		hspb8	A0A498LKJ6		nae1	A0A498LY63		RPS6KA2	A0A498N7E2		man1a1	A0A498M551		PLEKHO2	A0A498ND87		cul3	A0A498NAG6		mak16	A0A498MN95		ptbp2	A0A498N0X0		copz2	A0A498MY19
endog	A0A498LVA4		amylase	A0A498MYG2		bpgm	A0A498M3Y5		pdlim1	A0A498NZA9		sh3gl3	A0A498LZG2		lamb2	A0A498L2K9		tmed9	A0A498NTD8		ndrg4	A0A498MQ33		eif2a	A0A498NTQ4		npepl1	A0A498MZQ6		kif1a	A0A498MDU7		ganab	A0A498N589		brix1	A0A498MD24		glyr1	A0A498NI11		srp19	A0A498N377
mrto4	A0A498LVI3		banf1	A0A498MYH6		scfd1	A0A498MN03		pkd1l1	A0A498LFD6		sh3gl2	A0A498NAP7		gnl2	A0A498LGP6		amt	A0A498MMV2		fscn1	A0A498LAK0		CTBP2	A0A498LLX7		nans	A0A498MGP0		igf2bp2	A0A498L8U9		tmem214	A0A498LN85		dnaja2	A0A498ME23		esyt1	A0A498P1N8		ssbp1	A0A498MN52
nid1	A0A498LVN4		psmd12	A0A498MYH7		cdk5rap3	A0A498LSG3		col11a1	A0A498NVZ6		idh3g	A0A498MYZ3		CTBP2	A0A498LLX7		ciao1	A0A498LL84		phgdh	A0A498MR33		stk38	A0A498LP65		appl1	A0A498LQ34		nelfa	A0A498MJR3		aarsd1	A0A498LUG3		slc16a9	A0A498LQI4		xrcc5	A0A498MC33		acyp2	A0A498LMD9
rpl15	A0A498LVN5		rilpl2	A0A498MYI4		glo1	A0A498LP57		nup133	A0A498LQR3		rusc1	A0A498M085		myef2	A0A498M698		SLC39A3	A0A498MYF6		coch	A0A498MVT8		sept10	A0A498MAY9		prpf6	A0A498NW67		bzw1	A0A498LKG8		EPB41L2	A0A498LKM0		SEC24B	A0A498N838		ptprc	A0A498NTG3		itih2	A0A498L9R8
zbtb8os	A0A498LVR3		mesdc2	A0A498MYN3		pebp1	A0A498NG47		psmb10	A0A498P5Y7		atp1b2	A0A498MVI6		homer1	A0A498MIQ6		nup35	A0A498NE60		st13	A0A498NMR0		stk10	A0A498N8G4		exosc4	A0A498N898		tbc1d1	A0A498L925		arrb2	A0A498MMT3		ctnnbl1	A0A498NQE6		rae1	A0A498N8H1		ubxn6	A0A498MPQ1
hspg2	A0A498LVR7		znf451	A0A498MZ16		ampd2	A0A498L8L2		slc25a24	A0A498MBM2		mri1	A0A498N520		thop1	A0A498LQ71		chmp2a	A0A498LNM5		abat	A0A498NBJ5		ccdc88c	A0A498LRY7		myh7b	A0A498MFA4		pgm2	A0A498N046		cops5	A0A498MZ60		plekhf2	A0A498LFM9		mat2b	A0A498LGG2		CSNK2A1	A0A498LV59
tm9sf4	A0A498LVS5		COX7A2L	A0A498MZ40		bckdha	A0A498LC60		clvs2	A0A498LSN1		stoml2	A0A498MJ13		kcmf1	A0A498ME58		fahd2a	A0A498NL77		marcksl1	A0A498LYF0		mx1	A0A498MHV8		plek2	A0A498LR71		mylk	A0A498NP17		fxr2	A0A498MYT5		chd4	A0A498NJC5		edf1	A0A498N173		c9	A0A498LPL8
sar1b	A0A498LDZ5		cops5	A0A498MZ60		stt3a	A0A498MJ33		gyg1	A0A498LU11		apex1	A0A498MXE5		lgi1	A0A498LX10		hibadha	A0A498MZS1		acot9	A0A498NT14		gmppb	A0A498M3E5		xrn2	A0A498NK02		mapk12	A0A498LTL2		fmr1	A0A498LNV6		rtca	A0A498MM56		rap2a	A0A498LG39		rad17	A0A498NJL7
ppa1	A0A498LL47		rpia	A0A498MZ96		ssr3	A0A498MN87		ERP27	A0A498NL60		psat1	A0A498MVT9		psmb2	A0A498MZP1		C14orf166	A0A498LP40		idh3g	A0A498MYZ3		CALD1	A0A498MUT6		adam10	A0A498LCA1		EIF4G3	A0A498LQD7		fxr1	A0A498P5C7		csnk1a1	A0A498NCK2		samhd1	A0A498MIM7		sec23b	A0A498N4Q4
dlg5	A0A498LL74		sfxn3	A0A498MZB8		nup153	A0A498MWU9		sod2	A0A498LKV8		ero1l	A0A498LKD0		atp6v1g1	A0A498M939		hdhd1	A0A498L319		ndufa10	A0A498NBA5		chmp2a	A0A498LNM5		dbt	A0A498NZ94		ganab	A0A498N589		ggps1	A0A498LNH9		tmco1	A0A498NRB8		adam10	A0A498LCA1		psmd9	A0A498MQE7
kntc1	A0A498LQH0		lactb	A0A498MZD1		PNPT1	A0A498L5N9		brcc3	A0A498N6K7		cryl1	A0A498MAL2		rpl22l1	A0A498MCU8		habp2	A0A498NEC0		rusc1	A0A498M085		tagln3	A0A498NRS5		nudc	A0A498NQC1		tmem214	A0A498LN85		mcee	A0A498L6Z5		ABCD2	A0A498LEX8		gpn3	A0A498NKJ5		ATP8	H9C4W8
anxa6	A0A498LVS6		mtdh	A0A498MZF4		ndufa12	A0A498L9Q3		bpgm	A0A498M3Y5		ppp2r4	A0A498LRM8		acsl5	A0A498LRL0		ppl	A0A498NI43		apex1	A0A498MXE5		osbpl9	A0A498NRA2		acot9	A0A498NT14		plch2	A0A498LWN1		igf2r	A0A498MYB9		akt3	A0A498LUS8		ELOA	A0A498MX46		ndufb3	A0A498LJ72
alox5	A0A498LZ71		rab23	A0A498MZF8		kiaa0368	A0A498N963		nsdhl	A0A498N4F4		uchl5	A0A498MAE5		bccip	A0A498LU12		itgb4	A0A498N603		crk	A0A498LHE2		mapkapk2	A0A498MRD8		TOM1	A0A498NL76		mfn1	A0A498MRK5		atp6v1c1	A0A498N769		akt1	A0A498NSQ3		capza1	A0A498MN53		cd59	A0A498MK06
tysnd1	A0A498MTV6		prps1	A0A498MZJ1		parp1	A0A498LGP1		scamp1	A0A498NR13		cab39l	A0A498NJV9		usp14	A0A498N6B6		ktn1	A0A498LSE6		eif3m	A0A498NED7		polr2a	A0A498LS48		ap3m2	A0A498NGD5		elavl2	A0A498NML0		ndufa10	A0A498NBA5		pkd1l1	A0A498LFD6		stk3	A0A498N086		bin2	A0A498LAU9
PPA2	A0A498NX57		ppt1	A0A498MZL6		tmem33	A0A498N5A5		l1cam	A0A498LW45		adprh	A0A498MGA3		ndufa6	A0A498MHB9		tpr	A0A498LDV6		tat	A0A498MY15		EML4	A0A498MVJ2		ap3m1	A0A498NZ89		elavl4	A0A498NS54		twf1	A0A498NTA0		sri	A0A498LG84		RPS6KA2	A0A498N7E2		cacng1	A0A498MVW9
mtor	A0A498LVU3		psmb2	A0A498MZP1		tcea1	A0A498LFL4		rtn1	A0A498M998		tat	A0A498MY15		aimp1	A0A498LLM0		fxr2	A0A498MYT5		sfxn1	A0A498LYC7		cttn	A0A498LTW8		sod1	A0A498LF02		arrb2	A0A498MMT3		nckap1	A0A498N459		GCA	A0A498NPI3		nek7	A0A498MQR6		ndufa11	A0A498NJS7
dnajc5b	A0A498LVU8		npepl1	A0A498MZQ6		nup155	A0A498MMI4		nipbl	A0A498MPN9		dyrk4	A0A498MTT4		zmiz2	A0A498N9I9		nid1	A0A498LVN4		vdac3	A0A498NI22		prkag1	A0A498LH41		myl2	A0A498NR32		ddx47	A0A498L5B4		snx4	A0A498NHT1		KIF25	A0A498MHB2		CTBP2	A0A498LLX7		ptrhd1	A0A498LHU4
khdrbs1	A0A498LVV4		adsl	A0A498MZR2		ero1l	A0A498LKD0		prrt2	A0A498LBU4		vdac3	A0A498NI22		rdh12	A0A498LUW8		nipbl	A0A498MPN9		pcbp2	A0A498LAX0		rae1	A0A498N8H1		chuk	A0A498NDH5		fxr1	A0A498P5C7		hapln1	A0A498NQ29		me3	A0A498NAP3		celf1	A0A498MDW1		COX7A2L	A0A498MZ40
CNOT4	A0A498LVV7		pls3	A0A498MZT6		tubgcp2	A0A498N421		ncam1	A0A498NDY6		cspg5	A0A498NKU3		akt2	A0A498MFH8		CAPN1	A0A498MPI7		dyrk4	A0A498MTT4		myo6	A0A498MBZ1		ech1	A0A498NP92		fxr2	A0A498MYT5		foxk1	A0A498L533		fnta	A0A498NBL9		stk38	A0A498LP65		zbtb8os	A0A498LVR3
myoz1	A0A498N7V3		rab5a	A0A498MZU2		nxf1	A0A498N900		cntn1	A0A498MKH5		PDXP	A0A498LDH5		eya3	A0A498MNH3		fkbp9	A0A498N0E3		hnrnpa0	A0A498N1Y3		tmod3	A0A498N4C6		parp1	A0A498LGP1		fmr1	A0A498LNV6		casp7	A0A498LWI8		pptc7	A0A498MVX4		cebpz	A0A498M981		ppid	A0A498LWH4
SYNPO2	A0A498NJ38		ncaph	A0A498MZW3		COQ7	A0A498L9L3		gpc1	A0A498N4S2		hnrnpa0	A0A498N1Y3		akt3	A0A498LUS8		myo7a	A0A498NUD1		pdxk	A0A498LCE5		smad5	A0A498NU77		fmnl2	A0A498NNG3		ggps1	A0A498LNH9		casp3	A0A498N149		tbc1d9	A0A498LLX3		sept10	A0A498MAY9		TXLNB	A0A498NQJ1
mip	A0A498NGD1		pabpn1	A0A498N001		col12a1	A0A498M2L1		cog2	A0A498N102		nudt5	A0A498N717		akt1	A0A498NSQ3		eml2	A0A498LHW8		FAM49B	A0A498N1Q0		PMM1	A0A498MHX8		ctnnd2	A0A498LE92		KCTD12	A0A498LBV4		nrf1	A0A498M9K6		TBC1D9B	A0A498N5S2		stat3	A0A498LWF7		etnppl	A0A498MH48
TMEM263	A0A498LVY2		dgkz	A0A498N004		stk26	A0A498N9U1		hp1bp3	A0A498MUK5		yjefn3	A0A498MU63		l3mbtl1	A0A498MXA6		eif2b1	A0A498MSF0		hmgcl	A0A498NCN4		praf2	A0A498MFZ8		GLDC	A0A498MTC9		igf2r	A0A498MYB9		oxct1	A0A498MG85		neb	A0A498N3Y5		mx1	A0A498MHV8		tecr	A0A498MNH5
uri1	A0A498LVZ3		rpl30	A0A498N016		SLC25A22	A0A498LZI8		scarb2	A0A498M7K2		anp32e	A0A498N3E4		CUL7	A0A498MUU2		nadk2	A0A498NC90		stom	A0A498NKN9		shoc2	A0A498LHG9		ist1	A0A498ME94		cops3	A0A498N2D1		acss3	A0A498M0S1		ptprc	A0A498NTG3		gmppb	A0A498M3E5		ass1	A0A498MVZ3
psma1	A0A498LVZ6		psme1	A0A498N022		pitrm1	A0A498L3Z8		syn1	A0A498MBU0		blvra	A0A498N0E6		atp6v1c1	A0A498N769		slc16a9	A0A498LQI4		clta	A0A498MFE1		syk	A0A498LUL2		naa20	A0A498NJY6		ndufa10	A0A498NBA5		rab23	A0A498MZF8		ist1	A0A498ME94		tpp1	A0A498M886		farsa	A0A498NUW6
gstz1	A0A498LVZ9		pgm2	A0A498N046		KATNAL1	A0A498M7J9		pvrl1	A0A498M3K4		C5orf51	A0A498MMK1		sdcbp	A0A498LUF9		serpinh1	A0A498LQN4		cpa1	A0A498NWE3		CAMK1	A0A498LF47		arl15	A0A498MXK1		twf1	A0A498NTA0		araf	A0A498L271		mat2b	A0A498LGG2		chmp2a	A0A498LNM5		coq6	A0A498LSD3
ndufa7	A0A498LW32		yars	A0A498N049		NEURL2	A0A498LB59		capn11	A0A498LZE6		gnpda2	A0A498NET5		sirt5	A0A498LB15		aarsd1	A0A498LUG3		CPA3	A0A498LWH2		dhtkd1	A0A498MTD0		map4k4	A0A498MQ09		rufy2	A0A498NAH8		braf	A0A498MF96		edf1	A0A498N173		ube2h	A0A498ML75		cpt2	A0A498NR22
l1cam	A0A498LW45		ndufv2	A0A498N051		git1	A0A498LQL3		prep	A0A498NK12		cops7a	A0A498LG70		abhd16a	A0A498LBG1		bzw1	A0A498LKG8		anp32e	A0A498N3E4		kif5c	A0A498N878		mink1	A0A498N4C9		cbr1	A0A498NJN0		pkmyt1	A0A498NLR2		ELOA	A0A498MX46		crnkl1	A0A498NKB1		pmpca	A0A498N1I4
tln1	A0A498LW71		cmpk1	A0A498N071		wdr18	A0A498NJJ6		stau2	A0A498N771		mcu	A0A498N0B1		nup210	A0A498MU58		fnta	A0A498NBL9		anxa4	A0A498M537		fam171a1	A0A498NCE6		gys1	A0A498LZL8		slc12a2	A0A498M441		akt2	A0A498MFH8		flii	A0A498LDS4		dus3l	A0A498MM34		AADAT	A0A498MDF7
tln2	A0A498MVU2		UGT8	A0A498N073		taok2	A0A498MM58		VWA5A	A0A498MDM8		vapb	A0A498LN48		pdk3	A0A498MVA7		farsa	A0A498NUW6		anxa10	A0A498MXP6		fubp3	A0A498MUZ4		gys2	A0A498MD49		slc12a1	A0A498MB35		rufy3	A0A498MAE6		polr2b	A0A498NA51		fxr2	A0A498MYT5		rtn4ip1	A0A498N9R5
sh2d4a	A0A498LW82		kdsr	A0A498N094		plcb3	A0A498NTG7		dpp3	A0A498N600		psmg1	A0A498MHM4		xdh	A0A498MQ50		decr2	A0A498MPU1		blvra	A0A498N0E6		gopc	A0A498LI52		slc30a1	A0A498N3J5		wdr37	A0A498LWI2		pck1	A0A498NC69		CTBP2	A0A498LLX7		dhx8	A0A498LPF1		gcdh	A0A498NNP0
ankrd55	A0A498LW93		mcu	A0A498N0B1		aacs	A0A498NG73		ache	A0A498MQG7		gbas	A0A498LR17		wdr92	A0A498LZT4		carhsp1	A0A498N7T4		C5orf51	A0A498MMK1		supt4h1	A0A498NKH8		acsl5	A0A498LRL0		ik	A0A498NA94		pck2	A0A498N0Y6		dpyd	A0A498NE23		GBF1	A0A498N847		hibch	A0A498NHU6
hint1	A0A498LW95		ranbp3	A0A498N0B4		trip11	A0A498LYY9		mccc1	A0A498MVF3		gstm3	A0A498LT46		dscr3	A0A498MHR7		gmppb	A0A498M3E5		chuk	A0A498NDH5		dpp3	A0A498N600		bin2	A0A498LAU9		snx4	A0A498NHT1		mybpc3	A0A498M8F9		sept10	A0A498MAY9		naa20	A0A498NJY6		enoph1	A0A498LUE7
hmgcs1	A0A498LWA2		fkbp9	A0A498N0E3		snrnp70	A0A498NMP8		cttn	A0A498LTW8		isoc1	A0A498M060		spg21	A0A498NB20		aip	A0A498L7Y3		sirt5	A0A498LB15		rbm25	A0A498NKE7		sptlc1	A0A498M3D1		hapln1	A0A498NQ29		PLCB4	A0A498NSX7		ccdc88c	A0A498LRY7		stam2	A0A498NI83		rchy1	A0A498MK23
dync1li2	A0A498LWA9		blvra	A0A498N0E6		sart1	A0A498N5P6		eml2	A0A498LHW8		ndufv2	A0A498N051		sars2	A0A498M5J5		rcc1	A0A498L913		vapb	A0A498LN48		RRM1	A0A498LIA0		dnajc7	A0A498M6L9		casp7	A0A498LWI8		uggt1	A0A498NGH7		gmppb	A0A498M3E5		exoc6b	A0A498MPW7		tfam	A0A498N7L4
atp6v0a1	A0A498LWC4		tnnc2	A0A498N0H1		pds5a	A0A498N1E0		maob	A0A498N7T6		atp5o	A0A498NAQ8		fam177a1	A0A498N6M0		snf8	A0A498LGX1		bmp6	A0A498NBG7		tbc1d1	A0A498L925		hsd11b2	A0A498MLG5		casp3	A0A498N149		C11orf54	A0A498N1E7		cryz	A0A498P4F6		ZXDC	A0A498MYI7		psmg1	A0A498MHM4
tcirg1	A0A498MQB4		hk1	A0A498N0I6		stat3	A0A498LWF7		atad3a	A0A498MCP4		gstp1	A0A498NEU1		nr2c2	A0A498M1Y9		ssu72	A0A498L4V5		gbas	A0A498LR17		pgm2	A0A498N046		ddc	A0A498LCB0		oxct1	A0A498MG85		dctn1	A0A498LGX9		CALD1	A0A498MUT6		dlg3	A0A498LL25		pctp	A0A498M4Z1
ttc25	A0A498LWD3		RHOB	A0A498N0J0		tmed9	A0A498NTD8		nptn	A0A498LK64		ak1	A0A498LXQ7		rnf141	A0A498MFZ2		dhrs13	A0A498LHI3		gstm3	A0A498LT46		dync1li2	A0A498LWA9		fam49a	A0A498LDK9		araf	A0A498L271		SEPT12	A0A498N0P4		chmp2a	A0A498LNM5		ykt6	A0A498N3I9		cryba2	A0A498NN55
gad1	A0A498LP77		pgm3	A0A498N0K6		eif4h	A0A498M1G8		gad2	A0A498LWD9		sod2	A0A498LKV8		txlng	A0A498NJ86		vrk3	A0A498MQK5		rpl7	A0A498LJU3		mylk	A0A498NP17		trappc6b	A0A498ML61		braf	A0A498MF96		man1a1	A0A498M551		kdm1a	A0A498MN14		dicer1	A0A498LLS1		ndufa3	A0A498M8T1
csad	A0A498LQM8		vps4b	A0A498N0L6		mgea5	A0A498NBS6		crat	A0A498MJ07		cryba2	A0A498NN55		acsl1	A0A498LDW3		zyx	A0A498NNN0		auh	A0A498LUF6		mapk12	A0A498LTL2		gbas	A0A498LR17		pkmyt1	A0A498NLR2		man1c1	A0A498M6B8		stam2	A0A498NI83		cttn	A0A498LTW8		pknox1	A0A498LCK2
gad2	A0A498LWD9		cpne4	A0A498N0M0		usp5	A0A498N1H3		ndrg2	A0A498LFM0		gpx1	A0A498NS09		ppid	A0A498LWH4		sult6b1	A0A498LLM4		ndufv2	A0A498N051		ganab	A0A498N589		cdc37	A0A498MDY1		umps	A0A498N4V9		npepl1	A0A498MZQ6		dlg3	A0A498LL25		prkag1	A0A498LH41		stac3	A0A498M317
lasp1	A0A498LWE3		denr	A0A498N0M9		cnn3	A0A498N571		bsg	A0A498NT52		psmb2	A0A498MZP1		nid2	A0A498LTT6		wnk2	A0A498N2P5		pebp1	A0A498NG47		plxnb2	A0A498LIG6		crip1	A0A498LGM3		cul4a	A0A498MHW2		clta	A0A498MFE1		prkag1	A0A498LH41		fam91a1	A0A498N319		fkbp1a	A0A498LWN3
etfdh	A0A498LWE7		SEPT12	A0A498N0P4		acsl6	A0A498MEQ1		khdrbs1	A0A498LVV4		atp5h	A0A498LBS5		cbr1	A0A498NJN0		itih3	A0A498MUL6		atp5o	A0A498NAQ8		aarsd1	A0A498LUG3		exoc5	A0A498M1V8		mybpc3	A0A498M8F9		CLTB	A0A498N4R1		plxnb2	A0A498LIG6		ranbp9	A0A498MJT8		NRAP	A0A498LRJ9
mpp7	A0A498LWF6		agt	A0A498N0U2		scp2	A0A498M8P4		phgdh	A0A498MR33		mrpl24	A0A498M3K3		CPQ	A0A498LFY9		ITIH4	A0A498MTS8		gstp1	A0A498NEU1		smek1	A0A498MAG1		arhgap15	A0A498NEN6		pkd1l1	A0A498LFD6		mta2	A0A498LCW4		PMM1	A0A498MHX8		tmod3	A0A498N4C6		dohh	A0A498NRR4
stat3	A0A498LWF7		pck2	A0A498N0Y6		acaa1	A0A498LP08		IGLON5	A0A498NX52		lgalsl	A0A498N9Q8		mrpl37	A0A498M1Y5		klhl41	A0A498MUW0		blvrb	A0A498MNG1		elavl4	A0A498NS54		slc1a3	A0A498LXA3		UNC13C	A0A498NTC3		stag2	A0A498NTM3		mon2	A0A498NSC0		rad51	A0A498NL15		alkbh3	A0A498MD60
acly	A0A498LWG6		hnrnpa0	A0A498N148		fermt3	A0A498N227		marcksl1	A0A498LYF0		glo1	A0A498LP57		mvb12b	A0A498NIA6		srpx	A0A498N4E7		KATNAL1	A0A498M7J9		elavl2	A0A498NML0		heatr1	A0A498N9B6		uba5	A0A498NDZ0		atp6v0a1	A0A498LWC4		dbi	A0A498LFM5		PMM1	A0A498MHX8		ND5	V5XW03
gpx3	A0A498LWG8		nif3l1	A0A498N151		fermt1	A0A498MUZ9		plch2	A0A498LWN1		tbccd1	A0A498NB66		mettl13	A0A498NVP3		lama2	A0A498P6D3		rpl10	A0A498L8B5		bzw1	A0A498LKG8		abcb1	A0A498N7F2		iqsec3	A0A498LI57		myh7b	A0A498MFA4		ppcs	A0A498MSK6		PLEKHO2	A0A498ND87		mtx2	A0A498NNV7
mad2l1	A0A498P3E9		diaph2	A0A498N160		st13	A0A498NMR0		sept5	A0A498LUE9		FTHL17	A0A498M9Z8		mrpl44	A0A498MC72		sh3gl1	A0A498NS04		hmgb2	A0A498LD75		stag2	A0A498NTM3		fhl5	A0A498LMN9		apoa1bp	A0A498M809		ddah2	A0A498MD47		mapk14	A0A498NV34		prkci	A0A498NNV3		cbr4	A0A498MH08
wdr37	A0A498LWI2		ctgf	A0A498N176		NEDD4	A0A498MXN5		cops3	A0A498N2D1		cnbp	A0A498NJ76		ppat	A0A498MRN1		lama4	A0A498M9X2		atp5f1	A0A498NAE3		arl15	A0A498MXK1		fhl3	A0A498NIJ0		C11orf54	A0A498N1E7		DDAH1	A0A498M2T9		mylk	A0A498LFS7		vps8	A0A498L7N5		COQ5	A0A498NGF1
mif	A0A498LWI4		macrod1	A0A498N1A7		gfpt2	A0A498LPI3		twf1	A0A498NTA0		rtn4	A0A498N4P6		grk1	A0A498M6W2		serpinf1	A0A498LG29		ak1	A0A498LXQ7		arrb2	A0A498MMT3		pawr	A0A498LS91		EFTUD1	A0A498NA71		wapal	A0A498NCJ1		mapk12	A0A498LTL2		vdac3	A0A498NI22		mkrn2	A0A498NJ56
tnip1	A0A498LWJ3		ugdh	A0A498N1B2		ctnnd1	A0A498MKM0		sh3gl2	A0A498NAP7		cryab	A0A498M948		mrpl3	A0A498N3C5		aimp1	A0A498LLM0		sod2	A0A498LKV8		ggps1	A0A498LNH9		golgb1	A0A498LSD8		SEPT12	A0A498N0P4		hnrnpa3	A0A498LJ97		sf3a2	A0A498MZH9		rrp9	A0A498NRL8		iars2	A0A498N5U1
RNF157	A0A498LWK4		C11orf54	A0A498N1E7		casp3	A0A498N149		rusc1	A0A498M085		dgkz	A0A498N004		mff	A0A498MNZ0		ppcs	A0A498MSK6		cryba2	A0A498NN55		ptk2	A0A498NIH1		sod2	A0A498LKV8		prkce	A0A498LSA7		chdh	A0A498M851		ganab	A0A498N589		fam171a1	A0A498NCE6		sh3bp1	A0A498LBG3
psme3	A0A498LWL0		usp5	A0A498N1H3		nnt	A0A498N8P1		idh3g	A0A498N8I6		ppif	A0A498LM82		anxa4	A0A498M537		ndufa2	A0A498NC16		abhd14b	A0A498L5N4		KCTD12	A0A498LBV4		gmppa	A0A498NPA3		gmppb	A0A498M3E5		DCX	A0A498NMA4		aarsd1	A0A498LUG3		supt4h1	A0A498NKH8		BPHL	A0A498NTJ2
srcap	A0A498LWL3		itgav	A0A498N1H6		ache	A0A498MQG7		atp1b2	A0A498MVI6		prdx5	A0A498NCD5		NEURL2	A0A498LB59		casp6	A0A498NPC7		tsn	A0A498NEX9		cops3	A0A498N2D1		fahd2a	A0A498NL77		man1c1	A0A498M6B8		plek2	A0A498LR71		arfgef2	A0A498L8D0		nelfa	A0A498MJR3		pbdc1	A0A498MSR1
plch2	A0A498LWN1		hgd	A0A498N1P6		cluh	A0A498LHF1		mri1	A0A498N520		fabp7	A0A498LTJ0		arhgdia	A0A498LI33		HPGD	A0A498L7V7		atp5h	A0A498LBS5		atp6v1c1	A0A498N769		rdh14	A0A498N127		man1a1	A0A498M551		adam10	A0A498LCA1		arl15	A0A498MXK1		mylk	A0A498NP17		hddc3	A0A498MHR4
fkbp1a	A0A498LWN3		osgep	A0A498N1Z5		gys2	A0A498MD49		serpinb1	A0A498NC80		cotl1	A0A498N767		dpp3	A0A498N600		optc	A0A498MSQ5		park7	A0A498LYB8		twf1	A0A498NTA0		vrk3	A0A498MQK5		npepl1	A0A498MZQ6		alad	A0A498MB86		arrb2	A0A498MMT3		mapk12	A0A498LTL2		ND2	H9C4W5
DDAH1	A0A498LWN4		fermt3	A0A498N227		gys1	A0A498LZL8		glrx3	A0A498LFT5		pfn2	A0A498LY02		unc45a	A0A498MT24		anxa3	A0A498MM94		tpt1	A0A498L311		ddx23	A0A498NGG1		rbks	A0A498MFU8		trappc12	A0A498N045		dbt	A0A498NZ94		mcee	A0A498L6Z5		mapk14	A0A498NV34		C11orf68	A0A498NDX1
sptan1	A0A498LWN5		fermt2	A0A498N232		abcd3	A0A498NDM8		psat1	A0A498MVT9		fkbp1a	A0A498LWN3		apex1	A0A498MXE5		VWA5A	A0A498MDM8		ndufb10	A0A498MEZ8		RAB31	A0A498LEZ9		mcee	A0A498L6Z5		mpped2	A0A498LRI7		nudc	A0A498NQC1		cops3	A0A498N2D1		sf3a2	A0A498MZH9		ECHDC3	A0A498LMZ0
ppdpf	A0A498LWP4		sesn2	A0A498N280		acsl1	A0A498LDW3		crk	A0A498LHE2		txndc17	A0A498LEU3		tubgcp3	A0A498NJZ3		serpind1	A0A498NI15		cnbp	A0A498NJ76		vapb	A0A498LN48		tnni1	A0A498MJC0		exosc4	A0A498N898		acot9	A0A498NT14		RAB31	A0A498LEZ9		hibadha	A0A498MZS1		march5	A0A498LYJ7
dpp9	A0A498LWR2		camk2a	A0A498N294		hm13	A0A498LEV3		ero1l	A0A498LKD0		nhp2l1	A0A498MA66		rpa1	A0A498LHR7		dpp4	A0A498NJ89		rpl18	A0A498NPB6		vamp1	A0A498LKF6		myl10	A0A498N5U9		myh7b	A0A498MFA4		KYNU	A0A498NKT3		ruvbl1	A0A498L6Q9		aarsd1	A0A498LUG3		plaa	A0A498NVE1
pih1d1	A0A498LWR7		hspb7	A0A498N295		mtor	A0A498LWP3		armc1	A0A498N9N0		SH3BGRL	A0A498LJ34		nup133	A0A498LQR3		CALD1	A0A498MUT6		copz1	A0A498LTD9		ruvbl1	A0A498L6Q9		scgn	A0A498N7U2		DDAH1	A0A498M2T9		TOM1	A0A498NL76		cbr1	A0A498NJN0		SMG9	A0A498LXX1		slc2a11b	A0A498NAC9
ndufv1	A0A498LWS5		aldh3b1	A0A498N2C4		hdlbp	A0A498LCI4		eif3m	A0A498NED7		mif	A0A498LWI4		padi2	A0A498LR20		fbp2	A0A498NRE8		rpl18a	A0A498LIH2		cbr1	A0A498NJN0		anxa4	A0A498M537		ddah2	A0A498MD47		RPS6KA2	A0A498N7E2		arfgap3	A0A498L4B6		EMG1	A0A498NMY4		col28a1	A0A498NQY3
GANC	A0A498LWU4		rtcb	A0A498N2H4		ephx2	A0A498NP55		dyrk4	A0A498MTT4		C19orf70	A0A498NH70		nsa2	A0A498NQU3		fbn1	A0A498M6Z5		rtn4	A0A498N4P6		slc12a1	A0A498MB35		ampd1	A0A498LYA9		wapal	A0A498NCJ1		ap3m2	A0A498NGD5		nckap1	A0A498N459		dlgap5	A0A498LCA5		myoz3	A0A498N6C9
MTFP1	A0A498LWV6		prkar1a	A0A498N2L8		atxn2	A0A498MSU4		sfxn1	A0A498LYC7		acbd7	A0A498NB54		cdk5rap3	A0A498LSG3		btd	A0A498LYJ5		b4gat1	A0A498MPM1		slc12a2	A0A498M441		cpe	A0A498L8V7		HEPHL1	A0A498LGH5		ap3m1	A0A498NZ89		snx4	A0A498NHT1		osbpl11	A0A498NI48		ppp1r3f	A0A498N5F9
HSPA4L	A0A498LWX6		haao	A0A498N2M6		aox1	A0A498MB87		vdac3	A0A498NI22		col6a6	A0A498LQS3		tsn	A0A498NEX9		LGALS3	A0A498LH57		cryab	A0A498M948		pkd1l1	A0A498LFD6		SNTB2	A0A498NEB7		elavl3	A0A498MPM9		sod1	A0A498LF02		hgs	A0A498L6D4		pmpca	A0A498N1I4		NMI	A0A498P4P7
hspa4	A0A498NTF6		wnk2	A0A498N2P5		FAM120A	A0A498MSE9		hnrnpa0	A0A498N1Y3		col6a1	A0A498NRY6		bud31	A0A498L5I4		dpp3	A0A498N600		tmco1	A0A498NRB8		ppm1g	A0A498N7H5		kctd8	A0A498N8G3		plek2	A0A498LR71		dao	A0A498NG99		ttbk2	A0A498M0Z0		fxr1	A0A498P5C7		scrn3	A0A498LP59
prpf3	A0A498LWY6		cdkn2aipnl	A0A498N2U4		erc1	A0A498MPE0		lasp1	A0A498LWE3		tf	A0A498N853		ppie	A0A498N6L6		mfn2	A0A498LZ42		ppif	A0A498LM82		tm9sf4	A0A498LVS5		cadps	A0A498L6R9		alad	A0A498MB86		acsl4	A0A498NUU4		acbd3	A0A498MAD5		fmr1	A0A498LNV6		hmgcl	A0A498NCN4
lgi1	A0A498LX10		adi1	A0A498N2V1		usp10	A0A498NJ04		SLC25A22	A0A498LZI8		dlg5	A0A498LL74		tmod3	A0A498N4C6		bcap29	A0A498NZ72		rpl32	A0A498MLZ6		ttbk2	A0A498M0Z0		dysf	A0A498MY48		dbt	A0A498NZ94		dpyd	A0A498N584		acap2	A0A498NA53		mcee	A0A498L6Z5		col18a1	A0A498MZH4
lgi1a	A0A498NXZ3		papln	A0A498N304		ufl1	A0A498MAA7		pdxk	A0A498LCE5		rho	A0A498MKV7		AP3B2	A0A498LD24		apom	A0A498NSF4		ppih	A0A498M607		hapln1	A0A498NQ29		pls1	A0A498NV44		nudc	A0A498NQC1		chuk	A0A498NDH5		PLCB4	A0A498NTC0		map4k4	A0A498MQ09		GANC	A0A498LWU4
slc4a1	A0A498LX14		gga1	A0A498N338		vps53	A0A498LXI9		nudt5	A0A498N717		prx	A0A498NNA6		cnot2	A0A498MPS8		cast	A0A498LJR2		pdcd6	A0A498MR44		mon2	A0A498NSC0		gstp1	A0A498NEU1		acsl4	A0A498NUU4		ech1	A0A498NP92		abhd16a	A0A498LBG1		stau2	A0A498N771		cmya5	A0A498MRP8
phb	A0A498LX35		crtap	A0A498N352		aass	A0A498MD26		atp6ap1	A0A498MU45		hspg2	A0A498LVR7		tsr1	A0A498LH19		CKAP4	A0A498L1I1		dgkz	A0A498N004		cpne8	A0A498MLG3		CAMK1	A0A498LF47		myl2	A0A498NR32		ogt	A0A498MSU8		casp7	A0A498LWI8		vta1	A0A498LDA8		fam162a	A0A498NS63
pold1	A0A498LX53		hspa9	A0A498N369		dhtkd1	A0A498MTD0		cpa1	A0A498NWE3		tnn	A0A498MVF0		cpsf2	A0A498NK36		ppm1f	A0A498LFN2		rhebl1	A0A498MTE3		foxk1	A0A498L533		rab33b	A0A498MY22		chuk	A0A498NDH5		creb1	A0A498L309		araf	A0A498L271		PPA2	A0A498NX57		adck4	A0A498MED0
hsd17b1	A0A498LX75		srp19	A0A498N377		pcca	A0A498L3R2		CPA3	A0A498LWH2		tgfbi	A0A498NUS4		api5	A0A498MBP6		mgat4d	A0A498LVP1		prdx5	A0A498NCD5		PLCB4	A0A498NTC0		thop1	A0A498LQ71		ech1	A0A498NP92		hibch	A0A498NHU6		braf	A0A498MF96		hid1	A0A498LU33		soga3	A0A498M5I8
mvp	A0A498LX76		AGO4	A0A498N3A3		aldh4a1	A0A498LXF0		anp32e	A0A498N3E4		rpe65	A0A498N2N7		hsd17b12	A0A498MW42		chuk	A0A498NDH5		pin1	A0A498NLG8		abhd16a	A0A498LBG1		psmb2	A0A498MZP1		nup188	A0A498NR10		slc12a2	A0A498M441		kif1a	A0A498MDU7		rbm39	A0A498MJ42		mmrn2	A0A498NDX8
pam	A0A498LXA1		rpl14	A0A498N3B3		mmaa	A0A498MUQ2		yjefn3	A0A498MU63		igf2bp1	A0A498MU51		nans	A0A498MGP0		bpnt1	A0A498N514		rpl31	A0A498MC52		casp7	A0A498LWI8		UNC13C	A0A498NTC3		CXorf56	A0A498NEP4		map4k4	A0A498MQ09		pkmyt1	A0A498NLR2		stk38l	A0A498MER8		sdpr	A0A498N552
aldh4a1	A0A498LXF0		anp32e	A0A498N3E4		acadsb	A0A498LMG7		hsd17b12	A0A498MW42		nap1l4	A0A498L642		FTL	A0A498NDR4		gnmt	A0A498LU93		glipr2	A0A498NDJ7		casp3	A0A498N149		sec13	A0A498MAC6		map4k4	A0A498MQ09		mink1	A0A498N4C9		akt2	A0A498MFH8		YTHDC2	A0A498MVL1		gpt	A0A498NM13
hsdl1	A0A498LXG5		MAP1B	A0A498N3F6		gcdh	A0A498NU21		tollip	A0A498MVA6		lum	A0A498ML95		FTHL17	A0A498M9Z8		akap12	A0A498NCA7		cotl1	A0A498N767		nrf1	A0A498M9K6		hnrnpk	A0A498NGQ1		mink1	A0A498N4C9		sh3gl1	A0A498NS04		prep	A0A498NK12		cbr1	A0A498NJN0		golgb1	A0A498LSD8
smpdl3a	A0A498LXI0		fgr	A0A498N3G4		acox1	A0A498M7H7		cops7a	A0A498LG70		txndc5	A0A498NBH4		serpini1	A0A498LSH3		WDR1	A0A498MPH1		C11orf65	A0A498N5G5		oxct1	A0A498MG85		bdh1	A0A498LTZ8		fmnl2	A0A498NNG3		SLC25A10	A0A498M8Q5		sh3glb1	A0A498M723		ppm1g	A0A498N7H5		PRR33	A0A498MTS5
stxbp2	A0A498L8H8		efnb1	A0A498N3G6		STARD10	A0A498MIP6		mcu	A0A498N0B1		pdia6	A0A498LDE8		zar1	A0A498M6M7		srpx2	A0A498LPR7		pfn2	A0A498LY02		pgam5	A0A498NGG7		nhp2l1	A0A498NAK3		pik3c3	A0A498MY27		EIF4G3	A0A498LQD7		pank2	A0A498MZA7		snx4	A0A498NHT1		casq1	A0A498NQ14
cars	A0A498LSF8		rpl8	A0A498N3G7		RMDN1	A0A498MCU4		bmp6	A0A498NBG7		RGPD5	A0A498MYX9		zar1l	A0A498L7Q6		cryz	A0A498P4F6		fkbp1a	A0A498LWN3		araf	A0A498L271		pgm3	A0A498N0K6		nhlrc2	A0A498LPK8		fam49a	A0A498LDK9		glb1l	A0A498N195		casp3	A0A498N149		MUSTN1	A0A498MPT1
ccny	A0A498LXJ2		DST	A0A498N3H1		tmed4	A0A498LFE7		anxa10	A0A498MXP6		adss	A0A498LEX5		znf330	A0A498LML4		epcam	A0A498MSX6		txndc17	A0A498LEU3		braf	A0A498MF96		ndufa6	A0A498MHB9		ubqln4	A0A498NQC9		gbas	A0A498LR17		glb1	A0A498LUK8		casp7	A0A498LWI8		golga1	A0A498NMA7
DIAPH1	A0A498LXJ5		rpl11	A0A498N3H4		mtx2	A0A498NNV7		clic1	A0A498MCJ8		hapln1	A0A498NQ29		snx8	A0A498M9Z7		C6orf58	A0A498LD72		acot13	A0A498MLJ8		pkmyt1	A0A498NLR2		zmiz2	A0A498N9I9		polr2e	A0A498NNF7		hp1bp3	A0A498MUK5		myl2	A0A498NR32		polr3e	A0A498NHJ6		acap2	A0A498NA53
slc35g2	A0A498LXK1		ykt6	A0A498N3I9		rtn1	A0A498M5S4		gstm3	A0A498LT46		sag	A0A498MCQ3		xrcc6bp1	A0A498LJY8		ssb	A0A498NSJ3		SH3BGRL	A0A498LJ34		prpf6	A0A498NW67		rdh12	A0A498LUW8		ppm1h	A0A498NT63		snx8	A0A498M9Z7		srl	A0A498MXC3		pkmyt1	A0A498NLR2		jph2	A0A498LY25
gfm1	A0A498LXM1		sccpdh	A0A498N3L1		rtn3	A0A498LGC7		isoc1	A0A498M060		tmod4	A0A498NIP2		stat4	A0A498NHR6		ggct	A0A498LE09		plau	A0A498N806		mut	A0A498N3E3		l3mbtl1	A0A498MXA6		pdhx	A0A498M637		cdc37	A0A498MDY1		mybpc3	A0A498M8F9		znf622	A0A498NRU8		ache	A0A498MQG7
fam126a	A0A498LXT8		ubxn1	A0A498N3S1		rps10	A0A498LD02		pgam5	A0A498NGG7		murc	A0A498NTA9		pdlim1	A0A498NZA9		blvra	A0A498N0E6		f10	A0A498MBE1		myl2	A0A498NR32		eya3	A0A498MNH3		mms19	A0A498N5Y0		sorbs2	A0A498MUC4		lman1	A0A498LJT3		cnot10	A0A498LG34		mpp1	A0A498NE61
SMG9	A0A498LXX1		phyh	A0A498N3X7		MTFP1	A0A498LWV6		ndufv2	A0A498N051		serpinh1	A0A498LQN4		tecr	A0A498MNH5		LRG1	A0A498M2U1		habp2	A0A498LPN2		pck1	A0A498NC69		RHEB	A0A498M6L4		rraga	A0A498MZL1		fhl3	A0A498NIJ0		agpat4	A0A498LH37		akt2	A0A498MFH8		phkg2	A0A498LML8
nkiras1	A0A498LXX2		neb	A0A498N3Y5		lrpprc	A0A498N968		pebp1	A0A498NG47		set	A0A498NHZ1		GCA	A0A498NPI3		sccpdh	A0A498N3L1		mif	A0A498LWI4		pck2	A0A498N0Y6		rhebl1	A0A498MTE3		gbas	A0A498LR17		fhl5	A0A498LMN9		abcd1	A0A498LRH6		unc45a	A0A498MT24		sorbs1	A0A498N6L4
agap2	A0A498LXX6		pdlim7	A0A498N3Z6		erc2	A0A498MRQ2		atp5o	A0A498NAQ8		ogn	A0A498N7R3		gmps	A0A498LQI3		uchl1	A0A498MUF4		C19orf70	A0A498NH70		mybpc3	A0A498M8F9		ptk2	A0A498NIH1		hp1bp3	A0A498MUK5		pawr	A0A498LS91		apoa1bp	A0A498M809		zpr1	A0A498LUF5		ppp1r9b	A0A498NAU9
cbx5	A0A498LXY4		pgam2	A0A498N416		adck3	A0A498LD68		atp5f1	A0A498NAE3		myoz1	A0A498N7V3		psmb10	A0A498P5Y7		appl1	A0A498LQ34		col6a1	A0A498NRY6		UNC13C	A0A498NTC3		atp6v1c1	A0A498N769		gmps	A0A498LQI3		sod2	A0A498LKV8		mtx1	A0A498MNT9		neb	A0A498N3Y5		stbd1	A0A498MPX6
pfn2	A0A498LY02		tubgcp2	A0A498N421		tmlhe	A0A498NC20		gstp1	A0A498NEU1		alad	A0A498MB86		SLC25A22	A0A498LZI8		alad	A0A498MB86		tf	A0A498N853		arfgap3	A0A498L4B6		sdcbp	A0A498LUF9		taf5l	A0A498LUR8		gmppa	A0A498NPA3		EFTUD1	A0A498NA71		srl	A0A498MXC3		dmd	A0A498LRJ1
top2b	A0A498LY18		hkdc1	A0A498N424		ergic1	A0A498MW07		hmgb2	A0A498LD75		bag6	A0A498MCG5		exd2	A0A498N1H1		reep5	A0A498M3F5		dlg5	A0A498LL74		snx4	A0A498NHT1		mfap2	A0A498M8B4		snx8	A0A498M9Z7		mccc1	A0A498MVF3		dctn1	A0A498LGX9		PLCB4	A0A498NSX7		FAM188B	A0A498NSY8
top2a	A0A498NT58		nckap1	A0A498N459		mlec	A0A498MDW3		cryba2	A0A498NN55		pdlim7	A0A498N7X2		abcb8	A0A498N2F1		vtn	A0A498LQ67		hspg2	A0A498LVR7		CDC42BPA	A0A498LDK7		pdgfrb	A0A498N9F4		cdc37	A0A498MDY1		dctn2	A0A498NC63		SEPT12	A0A498N0P4		UNC13C	A0A498NTC3		NEURL2	A0A498LB59
srm	A0A498LY23		dnm1	A0A498N471		emc3	A0A498L630		gpx1	A0A498NS09		hyou1	A0A498LY34		pin1	A0A498NLG8		lxn	A0A498M4K7		PHKA2	A0A498NR97		dctn1	A0A498LGX9		upp1	A0A498MVF6		plxna4	A0A498M9K4		rbks	A0A498MFU8		dnajb11	A0A498NEV1		erlin2	A0A498N7A4		pik3c3	A0A498MY27
rab20	A0A498LY24		ddx3x	A0A498N489		mrpl4	A0A498LRL5		abhd14b	A0A498L5N4		polr2c	A0A498MLT3		fasn	A0A498LNV7		mst1	A0A498L8J5		neb	A0A498N3Y5		SEPT12	A0A498N0P4		dnajb1	A0A498MBS7		plxna3	A0A498N2L5		agxt2	A0A498LLD3		man1a1	A0A498M551		lman1	A0A498LJT3
jph2	A0A498LY25		tmod3	A0A498N4C6		vapb	A0A498LN48		blvrb	A0A498MNG1		pabpn1	A0A498N001		macf1	A0A498LAN4		thbs1	A0A498M5X4		dcn	A0A498M9M2		man1a1	A0A498M551		vil1	A0A498LRR3		jak1	A0A498NAB0		syf2	A0A498LLY0		man1c1	A0A498M6B8		arfgap3	A0A498L4B6
pdzk1	A0A498LY27		mink1	A0A498N4C9		rnf103	A0A498MV71		ykt6	A0A498N3I9		eif4h	A0A498M1G8		vamp7	A0A498M558		C11orf54	A0A498N1E7		ipo5	A0A498P3P8		man1c1	A0A498M6B8		TTN	A0A498NZ39		tjp2	A0A498MYC9		gpd1l	A0A498LFE6		npepl1	A0A498MZQ6		sepsecs	A0A498MH76
hyou1	A0A498LY34		polr1a	A0A498N4E6		ugt1a1	A0A498NDU4		tpt1	A0A498L311		crygn	A0A498M4R5		GBF1	A0A498N847		serpine2	A0A498MRK0		postn	A0A498LEZ7		npepl1	A0A498MZQ6		npnt	A0A498LL42		tjp3	A0A498MUR5		purg	A0A498LUM9		AP3S1	A0A498NA52		eif4e	A0A498LFK8
CARKD	A0A498LY36		srpx	A0A498N4E7		fdxr	A0A498LLL7		atp5h	A0A498LBS5		hint1	A0A498LW95		nsdhl	A0A498N4F4		smpdl3b	A0A498LTC9		tgfbi	A0A498NUS4		nans	A0A498MGP0		epn3	A0A498NZ28		sorbs2	A0A498MUC4		raly	A0A498LMG1		grhpr	A0A498N971		apoa1bp	A0A498M809
luc7l3	A0A498LY40		cops2	A0A498N4G1		mpc2	A0A498NAY0		ndufb10	A0A498MEZ8		bzw1	A0A498LKG8		PPA2	A0A498NX57		usp5	A0A498N1H3		srsf11	A0A498MNI0		appl1	A0A498LQ34		epn2	A0A498LCD7		fhl5	A0A498LMN9		stk3	A0A498N086		atp6v0a1	A0A498LWC4		C11orf54	A0A498N1E7
ntmt1	A0A498LY72		magt1	A0A498N4G3		CYTB	V5XVB7		FTHL17	A0A498M9Z8		ssb	A0A498NSJ3		scamp1	A0A498NR13		aimp2	A0A498NC19		nap1l4	A0A498L642		mpped2	A0A498LRI7		ppp2r5a	A0A498NFZ8		fhl3	A0A498NIJ0		clip1	A0A498LGH2		oxct1	A0A498MG85		cnot11	A0A498MDE1
tmem119	A0A498LY94		fkbp2	A0A498N4H0		exoc1	A0A498N1G4		cnbp	A0A498NJ76		ruvbl1	A0A498L6Q9		arl6ip5	A0A498N5E0		KIF25	A0A498MHB2		lum	A0A498ML95		exosc4	A0A498N898		plekhf2	A0A498LFM9		cmc1	A0A498L9Y5		YY2	A0A498MMD1		exosc4	A0A498N898		dctn1	A0A498LGX9
ampd1	A0A498LYA9		AHSG	A0A498N4I5		faf2	A0A498NEQ6		spryd4	A0A498NR16		pdia5	A0A498NHN2		atp6v0a1	A0A498LWC4		cspg4	A0A498LE97		adsl	A0A498MZR2		edf1	A0A498N173		nprl3	A0A498NFT9		erc2	A0A498MRQ2		palld	A0A498MDT9		myh7b	A0A498MFA4		SEPT12	A0A498N0P4
park7	A0A498LYB8		plekhm3	A0A498N4I9		DST	A0A498N3H1		PEA15	A0A498NPD4		lta4h	A0A498N9T1		akap12	A0A498NCA7		ambp	A0A498MNZ5		sesn2	A0A498N280		myh7b	A0A498MFA4		GCA	A0A498NPI3		fahd2a	A0A498NL77		qki	A0A498MKM2		ddah2	A0A498MD47		SYMPK	A0A498MSW9
mrpl24	A0A498M3K3		trove2	A0A498N4K4		CDC42BPA	A0A498LDK7		copz1	A0A498LTD9		emid1	A0A498NJN8		ND2	H9C4W5		cpvl	A0A498NPD7		shmt2	A0A498N951		bud31	A0A498L5I4		SLC7A8	A0A498MP10		phkb	A0A498M8P5		itgav	A0A498N1H6		DDAH1	A0A498M2T9		npepl1	A0A498MZQ6
marcksl1	A0A498LVW9		mgat4b	A0A498N4K6		DOCK1	A0A498MJH4		rtn4	A0A498N4P6		mip	A0A498NGD1		bag6	A0A498MCG5		c5	A0A498MMD9		polr1a	A0A498N4E6		elavl3	A0A498MPM9		btk	A0A498N541		rbks	A0A498MFU8		ace	A0A498LUH0		wapal	A0A498NCJ1		nans	A0A498MGP0
idi1	A0A498LYI2		cat	A0A498N4M9		kif1a	A0A498MDU7		b4gat1	A0A498MPM1		gyg1	A0A498P2U5		cp	A0A498MX98		gpn3	A0A498NKJ5		farsa	A0A498NUW6		plek2	A0A498LR71		smtn	A0A498NBN5		mcee	A0A498L6Z5		ampd1	A0A498LYA9		pcyt2	A0A498N8I4		exosc4	A0A498N898
eci2	A0A498LYJ3		rtn4	A0A498N4P6		rock2	A0A498LQC0		tmco1	A0A498NRB8		akap12	A0A498NCA7		usp7	A0A498NBJ7		AHSG	A0A498N4I5		pdia6	A0A498LDE8		cstf1	A0A498MJ92		acsl1	A0A498LDW3		tnni1	A0A498MJC0		FBN3	A0A498MW06		chdh	A0A498M851		myh7b	A0A498MFA4
march5	A0A498LYJ7		gsr	A0A498N4Q6		ap1s2	A0A498NJR7		dgkz	A0A498N004		grk1	A0A498M6W2		cog2	A0A498N102		ND1	H9C4W4		RGPD5	A0A498MYX9		gmpr	A0A498MVQ2		crat	A0A498MJ07		gpd1l	A0A498LFE6		SNTB2	A0A498NEB7		gbas	A0A498LR17		ddah2	A0A498MD47
acot7	A0A498LYK0		CLTB	A0A498N4R1		kiaa1033	A0A498MJR1		cops8	A0A498NEP6		cfi	A0A498LLL2		hp1bp3	A0A498MUK5		dcxr	A0A498NAW3		txndc5	A0A498NBH4		dbt	A0A498NZ94		trappc4	A0A498M0T9		purg	A0A498LUM9		pcyt1a	A0A498N083		elavl3	A0A498MPM9		DDAH1	A0A498M2T9
kiaa2013	A0A498LYM3		pbld	A0A498N4R3		GNAZ	A0A498MXC9		pdcd6	A0A498MR44		BFSP1	A0A498N6I2		add1	A0A498N6U6		rpl14	A0A498N3B3		tmod4	A0A498NIP2		nudc	A0A498NQC1		nid2	A0A498LTT6		tsta3	A0A498NTX3		crat	A0A498MJ07		elavl2	A0A498NML0		me1	A0A498NJ16
adar	A0A498LYN1		gpc1	A0A498N4S2		farsa	A0A498NUW6		prdx5	A0A498NCD5		bgn	A0A498LBF9		capn11	A0A498LZE6		pebp1	A0A498NG47		capza1	A0A498MN53		rraga	A0A498MZL1		cbr1	A0A498NJN0		slc8a1	A0A498NFB5		scube3	A0A498NRB0		elavl4	A0A498NSV6		ik	A0A498NA94
ZNHIT6	A0A498LYP6		acadl	A0A498N4S4		sh3bp2	A0A498NER5		C11orf65	A0A498N5G5		ITIH4	A0A498MTS8		ttc25	A0A498LWD3		ndufb10	A0A498MEZ8		hnrnpa1	A0A498LSH0		TOM1	A0A498NL76		fcho2	A0A498NEP2		itgav	A0A498N1H6		scube2	A0A498MTC5		xrn2	A0A498NK02		syt1	A0A498LTH2
parva	A0A498M9A8		bpnt1	A0A498N514		akap10	A0A498MS40		pfn2	A0A498LY02		EPB41L2	A0A498LCY6		rabggta	A0A498LQJ1		gpx3	A0A498LWG8		alad	A0A498MB86		ap3m2	A0A498NGD5		hapln3	A0A498MJW1		anxa4	A0A498M537		fbn1	A0A498M6Z5		adam10	A0A498LCA1		alad	A0A498MB86
dctn4	A0A498LYU8		tlr21	A0A498N519		tarbp2	A0A498LV30		fkbp1a	A0A498LWN3		kera	A0A498MFI8		hspa12b	A0A498NUL7		pbld	A0A498N6F0		emc2	A0A498LFR4		ap3m1	A0A498NZ89		hapln1	A0A498NQ29		ace	A0A498LUH0		aida	A0A498NSI3		alad	A0A498MB86		dbt	A0A498NZ94
vti1b	A0A498LYX0		mri1	A0A498N520		snx5	A0A498LQ72		txndc17	A0A498LEU3		c9	A0A498LPL8		hspa12a	A0A498P302		RPL27A	A0A498M799		nsdhl	A0A498N4F4		sod1	A0A498LF02		ppwd1	A0A498MS76		HPCAL1	A0A498LDM3		top1	A0A498NK94		dbt	A0A498NZ94		nudc	A0A498NQC1
ankfy1	A0A498LYZ7		crkl	A0A498N553		rgn	A0A498NNC6		SH3BGRL	A0A498LJ34		fgg	A0A498LEH5		jakmip2	A0A498N6P6		pin1	A0A498NLG8		mrpl44	A0A498MC72		nprl3	A0A498NFT9		elmo1	A0A498N309		ncald	A0A498LGU7		cpb2	A0A498L347		rraga	A0A498MZL1		acot9	A0A498NT14
qars	A0A498LZ02		cnn3	A0A498N571		NLRC5	A0A498MFX3		plau	A0A498N806		rbp3	A0A498MVB9		crat	A0A498MJ07		mdk	A0A498M8K8		TTN	A0A498NZ39		RMDN1	A0A498MCU4		PPA2	A0A498NX57		ampd1	A0A498LYA9		gstp1	A0A498NEU1		KYNU	A0A498NKT3		clgn	A0A498MT53
ubtf	A0A498LZ18		rsu1	A0A498N579		pter	A0A498NZP2		f10	A0A498MBE1		prelp	A0A498MSP0		nae1	A0A498LY63		sh3glb1	A0A498M723		gys1	A0A498LZL8		dao	A0A498NG99		pgm5	A0A498MBC1		FBN3	A0A498MW06		ube3c	A0A498MBZ5		TOM1	A0A498NL76		mgat4b	A0A498N4K6
entpd2	A0A498LZ30		ganab	A0A498N589		cpne4	A0A498N0M0		habp2	A0A498LPN2		arr3	A0A498LL34		khdrbs1	A0A498LVV4		macrod1	A0A498N1A7		pabpn1	A0A498N001		acsl4	A0A498NUU4		cotl1	A0A498N767		myl10	A0A498N5U9		gga1	A0A498N338		RPS6KA2	A0A498N7E2		lrrcc1	A0A498LJH4
gemin5	A0A498LZ34		arl6ip5	A0A498N5E0		CPNE7	A0A498NJ35		atp6v1f	A0A498MDB7		acvr2b	A0A498L7R7		abat	A0A498NBJ5		C4orf33	A0A498MI09		eif4h	A0A498M1G8		chuk	A0A498NDH5		micu1	A0A498MZZ5		cdh2	A0A498LWB5		lamb2	A0A498L2K9		sod1	A0A498LF02		acadvl	A0A498MKU0
dhrs7b	A0A498LZ39		ahcy	A0A498N5E1		ostf1	A0A498MRW3		mif	A0A498LWI4		omp	A0A498NUR6		sh3gl3	A0A498LZG2		glrx	A0A498LZX5		crygn	A0A498M4R5		ech1	A0A498NP92		slc25a20	A0A498MA61		sun1	A0A498NTM2		dhrs12	A0A498N7U4		dao	A0A498NG99		ap3m2	A0A498NGD5
mfn2	A0A498LZ42		C11orf65	A0A498N5G5		rab24	A0A498M4I9		C19orf70	A0A498NH70		psme2	A0A498NMM5		sh3gl2	A0A498NAP7		pfn1	A0A498LJP3		spcs3	A0A498LC14		rcc1	A0A498L913		ctsz	A0A498LKT3		pcyt1a	A0A498N083		snx9	A0A498N326		acsl4	A0A498NUU4		ap3m1	A0A498NZ89
olfm1	A0A498MQJ9		pc	A0A498N5N1		btf3	A0A498NED9		acbd7	A0A498NB54		apoe	A0A498LT17		idh3g	A0A498MYZ3		tgm1	A0A498LCV7		banf1	A0A498MYH6		mink1	A0A498N4C9		apex1	A0A498MXE5		kctd8	A0A498N8G3		lgi1	A0A498LX10		chuk	A0A498NDH5		sod1	A0A498LF02
mfn1	A0A498MRK5		ctsc	A0A498N5Q8		slc16a9	A0A498LQI4		col6a6	A0A498LVS1		blvrb	A0A498MNG1		mri1	A0A498N520		sidt2	A0A498L2U2		RPL37A	A0A498MNH9		map4k4	A0A498MQ09		anxa1	A0A498NJQ3		crat	A0A498MJ07		mapkapk2	A0A498MRD8		sfxn2	A0A498LP20		chuk	A0A498NDH5
PLEKHO2	A0A498ND87		myl10	A0A498N5U9		nck2	A0A498M8A4		col6a1	A0A498NRY6		sorbs1	A0A498N6L4		lancl1	A0A498MFQ8		pter	A0A498NZP2		hint1	A0A498LW95		hibch	A0A498NHU6		padi2	A0A498LR20		plxna1	A0A498NKS1		UNC13C	A0A498NTC3		ech1	A0A498NP92		dpyd	A0A498N9R1
aspdh	A0A498LZ59		sepn1	A0A498N5V9		nck1	A0A498M3P0		tf	A0A498N853		plg	A0A498MP37		glrx3	A0A498LFT5		COX2	H9C4W7		rpl22l1	A0A498MCU8		skiv2l2	A0A498M7N4		arrb2	A0A498MMT3		PLXNA2	A0A498ML38		setd3	A0A498LKG2		ogt	A0A498MSU8		mink1	A0A498N4C9
dek	A0A498LZ91		dpp3	A0A498N600		mink1	A0A498N4C9		dlg5	A0A498LL74		cetp	A0A498MH61		gipc1	A0A498MKT8		clec3b	A0A498M3J2		zmiz2	A0A498N9I9		osbpl11	A0A498NI48		elavl2	A0A498NML0		SLC6A13	A0A498NTI9		nploc4	A0A498LR06		creb1	A0A498L309		cpsf2	A0A498NK36
kmo	A0A498LZA4		slc3a1	A0A498N651		WDR44	A0A498LAC3		rho	A0A498MKV7		coasy	A0A498L3R0		necap1	A0A498NEK3		ndufv2	A0A498N051		nans	A0A498MGP0		exoc4	A0A498MEI4		elavl4	A0A498NSV6		SLC6A11	A0A498NJT0		acsl5	A0A498LRL0		lpgat1	A0A498N1V0		creb1	A0A498L309
CTBP2	A0A498LLX7		usp14	A0A498N6B6		ctnnbl1	A0A498NQE6		PHKA2	A0A498NR97		agt	A0A498N0U2		psat1	A0A498MVT9		atp5h	A0A498LBS5		dnaja2	A0A498ME23		stxbp2	A0A498L8H8		wdr45	A0A498MS66		ndrg4	A0A498MQ33		pkd1l1	A0A498LFD6		kiaa0196	A0A498MGE1		ascc3	A0A498LEW1
CTBP1	A0A498LQ97		arl9	A0A498N6B9		plekhf2	A0A498LFM9		dcn	A0A498M9M2		TRIP10	A0A498L7Z4		cryl1	A0A498MAL2		ppp1r10	A0A498MTQ7		ssb	A0A498NSJ3		bin2	A0A498LAU9		acox3	A0A498NTH1		capn5	A0A498NTD3		sec13	A0A498MAC6		map4k4	A0A498MQ09		patl1	A0A498LQS9
ANKRD13D	A0A498LZB6		SNX2	A0A498N6C7		rtca	A0A498MM56		mrps9	A0A498NPH4		angptl7	A0A498LVX8		armc1	A0A498N9N0		synm	A0A498MFT6		dctn2	A0A498NC63		SLC25A10	A0A498M8Q5		kntc1	A0A498LQH0		pcif1	A0A498LB19		bdh1	A0A498LTZ8		mink1	A0A498N4C9		ddx41	A0A498ND57
loxl4	A0A498LZC4		ube2n	A0A498N6E6		ntmt1	A0A498LY72		postn	A0A498LEZ7		adhfe1	A0A498NT75		tat	A0A498MY15		ubxn1	A0A498N3S1		ruvbl1	A0A498L6Q9		pdhx	A0A498M637		sh3pxd2b	A0A498NCE2		pdk1	A0A498LGU8		cryl1	A0A498MAL2		strn3	A0A498MVV8		arhgap5	A0A498MV13
C5orf63	A0A498LZE1		psmb1	A0A498N6J0		csnk1a1	A0A498NCK2		capn3	A0A498LUN0		bmp6	A0A498NBG7		dyrk4	A0A498MTT4		tlr21	A0A498N519		emid1	A0A498NJN8		nek7	A0A498MQR6		pfdn1	A0A498NYC1		pdk4	A0A498N255		gpx4	A0A498MGM1		nhlrc2	A0A498LPK8		sec23ip	A0A498P0P1
srp9	A0A498LZI4		sorbs1	A0A498N6L4		ABCD2	A0A498LEX8		tgfbi	A0A498NUS4		clpp	A0A498N353		vdac3	A0A498NI22		lmo7	A0A498MEA4		mta2	A0A498LCW4		esrp2	A0A498MJ08		hsd17b12	A0A498MW42		nelfe	A0A498MG83		usp14	A0A498N6B6		gfm1	A0A498M0Y0		wwp2	A0A498NYE1
rbbp9	A0A498LZI5		ppie	A0A498N6L6		slc4a4	A0A498L573		klhl31	A0A498MZG5		gmppb	A0A498M3E5		cpped1	A0A498L8L8		nccrp1	A0A498LE53		hspa4	A0A498NTF6		fam49a	A0A498LDK9		KATNAL1	A0A498M7J9		syn2	A0A498NJI5		nhp2l1	A0A498MA66		stxbp2	A0A498L8H8		nhlrc2	A0A498LPK8
SLC25A22	A0A498LZI8		slc25a13	A0A498N6M3		atp8a1	A0A498N580		rpe65	A0A498N2N7		acox1	A0A498M7H7		hnrnpa0	A0A498N148		apoa1bp	A0A498M809		parp1	A0A498LGP1		trappc6b	A0A498ML61		sptlc2	A0A498NKS8		syn1	A0A498MBU0		pgm3	A0A498N0K6		parva	A0A498M9A8		rbbp5	A0A498LBC2
mthfr	A0A498LZK0		jakmip2	A0A498N6P6		atp8a2	A0A498NSX3		yars	A0A498N049		gns	A0A498MSP6		pdxk	A0A498LCE5		tpk1	A0A498L766		txndc12	A0A498NUQ3		gbas	A0A498LR17		capn5	A0A498NTD3		SYN3	A0A498N690		ndufa6	A0A498MHB9		mesdc2	A0A498MYN3		bin2	A0A498LAU9
ndufaf4	A0A498LZS4		f3	A0A498N6U4		akt3	A0A498LUS8		klhl41	A0A498MUW0		acy1	A0A498N1Q7		nudt5	A0A498N717		ogn	A0A498N7R3		mesdc2	A0A498MYN3		hp1bp3	A0A498MUK5		C6orf136	A0A498MGC5		TTN	A0A498NZ39		zmiz2	A0A498N9I9		polr2e	A0A498NNF7		smarcd1	A0A498NID7
wdr92	A0A498LZT4		add1	A0A498N6U6		pkd1l1	A0A498LFD6		srsf11	A0A498MNI0		C6orf58	A0A498LD72		anp32e	A0A498N3E4		eci1	A0A498MX93		cfi	A0A498LLL2		arhgap15	A0A498NEN6		mcm3ap	A0A498NI93		dysf	A0A498MY48		rdh12	A0A498LUW8		pcyt1a	A0A498N083		sh3gl1	A0A498NS04
glrx	A0A498LZX5		C19orf66	A0A498N6Z3		myo7a	A0A498NUD1		nap1l4	A0A498L642		ALPK1	A0A498NF89		anxa10	A0A498MXP6		blvrb	A0A498MNG1		ITIH4	A0A498MTS8		jak1	A0A498NAB0		snx8	A0A498M9Z7		PHKA2	A0A498NR97		vta1	A0A498LDA8		pfas	A0A498MXI8		xab2	A0A498N3W7
pgk1	A0A498LZY5		cdk6	A0A498N709		crybb2	A0A498P1P5		lum	A0A498ML95		rpia	A0A498MZ96		blvra	A0A498N0E6		hspb1	A0A498NLH3		EPB41L2	A0A498LCY6		tjp3	A0A498MUR5		rpl14	A0A498N3B3		gstp1	A0A498NEU1		cab39l	A0A498NJV9		hp1bp3	A0A498MUK5		armc8	A0A498N829
cd36	A0A498LZY6		nudt5	A0A498N717		hspb1	A0A498NLH3		farsa	A0A498NUW6		WDR1	A0A498MPH1		C19orf52	A0A498N670		eif4e	A0A498LFK8		fgg	A0A498LEH5		fhl3	A0A498NIJ0		pdlim1	A0A498NZA9		TBC1D9B	A0A498N5S2		nudt2	A0A498M1G4		crip1	A0A498LGM3		itpr1	A0A498NQL6
rgs18	A0A498M000		PPIC	A0A498N724		stxbp5l	A0A498ND16		txndc5	A0A498NBH4		vars	A0A498LBP2		cops7a	A0A498LG70		plch2	A0A498LWN1		prelp	A0A498MSP0		wdr61	A0A498LAT7		adi1	A0A498N2V1		dnajc11	A0A498L4D0		sdcbp	A0A498LUF9		thop1	A0A498LQ71		esrp2	A0A498MJ08
mrpl28	A0A498M013		tmed2	A0A498N739		camkk1	A0A498LQQ9		pdia6	A0A498LDE8		arpc5	A0A498LDJ8		vapb	A0A498LN48		gstk1	A0A498NIZ5		cmbl	A0A498LJP4		gmppa	A0A498NPA3		tecr	A0A498MNH5		dhrs12	A0A498N7U4		sirt5	A0A498LB15		HOOK3	A0A498MW44		isy1	A0A498NJD5
enah	A0A498M036		pi15	A0A498N751		KIF25	A0A498MHB2		RGPD5	A0A498MYX9		anxa3	A0A498MM94		cpa1	A0A498NX28		edf1	A0A498N173		DHRS2	A0A498MT19		numb	A0A498N647		psmb3	A0A498MYG1		mfn2	A0A498LZ42		mfap2	A0A498M8B4		clip1	A0A498LGH2		polr3f	A0A498MSI3
pdf	A0A498M044		cotl1	A0A498N767		pde1a	A0A498N0M8		adss	A0A498LEX5		mlec	A0A498MDW3		gstm3	A0A498LT46		ssbp1	A0A498MN52		hgd	A0A498N1P6		mccc1	A0A498MVF3		hspa12b	A0A498NUL7		thop1	A0A498LQ71		polb	A0A498NHX9		heatr1	A0A498N9B6		FAM49B	A0A498N1Q0
isoc1	A0A498M060		atp6v1c1	A0A498N769		soga3	A0A498LX81		tmod4	A0A498NIP2		rtn4ip1	A0A498N9R5		isoc1	A0A498M060		pls1	A0A498NV44		dbi	A0A498LFM5		cotl1	A0A498N767		clic2	A0A498LIJ7		lgi1	A0A498LX10		upp1	A0A498MVF6		jak1	A0A498NAB0		fam49a	A0A498LDK9
trim25	A0A498M062		dars	A0A498N790		EPB41L2	A0A498LCY6		murc	A0A498NTA9		akr1a1	A0A498NTT9		auh	A0A498LUF6		dbnl	A0A498NAE7		sorbs1	A0A498N6L4		rdh14	A0A498N127		sdr16c5	A0A498NIH3		psmb2	A0A498MZP1		eif3m	A0A498NED7		tjp3	A0A498MUR5		mesdc2	A0A498MYN3
phax	A0A498M070		erlin2	A0A498N7A4		zc2hc1a	A0A498M1B4		serpinh1	A0A498LQN4		asl	A0A498LPJ7		ndufv2	A0A498N051		ppt1	A0A498MZL6		plg	A0A498MP37		vrk3	A0A498MQK5		ppif	A0A498LM82		mmp2	A0A498MP00		dscr3	A0A498MHR7		tjp2	A0A498MYC9		trappc6b	A0A498ML61
slc27a6	A0A498M078		arcn1	A0A498N7H4		PHYHIP	A0A498N3V9		esd	A0A498N9Q6		prss16	A0A498MU91		atp5o	A0A498NAQ8		ca5a	A0A498M135		wapal	A0A498NCJ1		rbks	A0A498MFU8		slc25a24	A0A498MBM2		nebl	A0A498M2X7		dnajb1	A0A498MBS7		fhl5	A0A498LMN9		gbas	A0A498LR17
tmx3	A0A498M080		chmp4b	A0A498N7K0		oxr1	A0A498MKH8		necab2	A0A498MAU4		rbp4	A0A498LVA3		atp5f1	A0A498NAE3		rars	A0A498LTZ7		etfdh	A0A498LWE7		mcee	A0A498L6Z5		gyg1	A0A498LU11		htra1	A0A498NE24		vil1	A0A498LRR3		fhl3	A0A498NIJ0		ank3	A0A498NCQ5
rusc1	A0A498M085		tfam	A0A498N7L4		AP3B2	A0A498LD24		fbp2	A0A498NRE8		plaa	A0A498NVE1		hmgb2	A0A498LD75		tes	A0A498MJX4		coasy	A0A498L3R0		eny2	A0A498LGH4		pin1	A0A498NLG8		HTRA2	A0A498MYC4		pik3r1	A0A498MKL0		hpd	A0A498MGZ5		hp1bp3	A0A498MUK5
aldh7a1	A0A498M088		rab27b	A0A498N7M2		tnr	A0A498MHK0		ogn	A0A498N7R3		ganab	A0A498N589		ak1	A0A498LXQ7		TPMT	A0A498NAT0		agt	A0A498N0U2		tnni1	A0A498MJC0		ERP27	A0A498NL60		sec13	A0A498MAC6		itga8	A0A498NDJ2		erc2	A0A498MRQ2		taf5l	A0A498LUR8
mrps10	A0A498M090		cdv3	A0A498N7N0		dmxl2	A0A498MVT5		znf346	A0A498LRE1		snx5	A0A498LQ72		gpx1	A0A498NS09		dnph1	A0A498MLG0		TRIP10	A0A498L7Z4		gpd1l	A0A498LFE6		amt	A0A498MMV2		bdh1	A0A498LTZ8		epn2	A0A498LCD7		sod2	A0A498LKV8		bsdc1	A0A498LMQ1
cdh11	A0A498M0B0		ogn	A0A498N7R3		DGKG	A0A498NM25		myoz1	A0A498N7V3		tpr	A0A498LDV6		mrpl24	A0A498M3K3		PTS	A0A498NHH1		angptl7	A0A498LVX8		myl10	A0A498N5U9		brcc3	A0A498N6K7		cryl1	A0A498MAL2		epn3	A0A498NZ28		decr2	A0A498MPU1		cdc37	A0A498MDY1
lmcd1	A0A498M0D2		RAB21	A0A498N7R7		gpm6a	A0A498LGQ1		rlbp1	A0A498MEZ4		ufl1	A0A498MAA7		tpt1	A0A498L311		ndufb7	A0A498MI42		hpd	A0A498NED6		purg	A0A498LUM9		actr10	A0A498NS30		bccip	A0A498LU12		ppp2r5a	A0A498NFZ8		fahd2a	A0A498NL77		skiv2l	A0A498MTM1
ubap2	A0A498M0G5		carhsp1	A0A498N7T4		slc25a25	A0A498LQC1		dhrs7c	A0A498NHE3		grm2	A0A498LDH3		arl3	A0A498MW00		MRPS36	A0A498NS37		adhfe1	A0A498NT75		hmbs	A0A498N9V5		bpgm	A0A498M3Y5		usp14	A0A498N6B6		plekhf2	A0A498LFM9		hddc3	A0A498MHR4		HOOK3	A0A498MW44
rpl7l1	A0A498M0I6		maob	A0A498N7T6		rph3a	A0A498N4H1		bag6	A0A498MCG5		cyp1a	A0A498MEQ7		glo1	A0A498LP57		atp5j2	A0A498M8D4		cpox	A0A498NRK2		ABCF3	A0A498NA79		arl6ip5	A0A498N5E0		shmt1	A0A498L5W2		cnrip1	A0A498LNC9		dctn2	A0A498NC63		phgdh	A0A498MR33
psph	A0A498M0I8		scgn	A0A498N7U2		RASGRF1	A0A498MIZ1		emc2	A0A498LFR4		hgd	A0A498N1P6		atp5h	A0A498LBS5		tnc	A0A498NLK0		MPST	A0A498NM22		scgn	A0A498N7U2		TPP2	A0A498M7L0		pgm3	A0A498N0K6		nprl3	A0A498NFT9		phkb	A0A498M8P5		setd3	A0A498LKG2
rapgef2	A0A498M0J7		fbxl18	A0A498N7Y8		hdac11	A0A498MI97		pdlim7	A0A498N7X2		acaa1	A0A498LP08		ndufb10	A0A498MEZ8		thbs4	A0A498MP89		gabrd	A0A498M145		tsta3	A0A498NTX3		HEPHL1	A0A498LGH5		ndufa6	A0A498MHB9		pdk3	A0A498MVA7		kmo	A0A498LZA4		enah	A0A498M036
pofut1	A0A498M0R9		galm	A0A498N834		RPS6KA2	A0A498N7E2		smyd1	A0A498N386		phyhd1	A0A498NQ68		cnbp	A0A498NJ76		adprh	A0A498M566		clpp	A0A498N353		tmem30a	A0A498M1P6		cog2	A0A498N102		rdh12	A0A498LUW8		nrip2	A0A498MAH9		rbks	A0A498MFU8		tjp2	A0A498MYC9
acss3	A0A498M0S1		tf	A0A498N853		ampd1	A0A498LYA9		crygn	A0A498M4R5		sccpdh	A0A498N3L1		copz1	A0A498LTD9		fbln1	A0A498NRZ2		gns	A0A498MSP6		itgav	A0A498N1H6		hp1bp3	A0A498MUK5		eya3	A0A498MNH3		folh1b	A0A498MU97		agxt2	A0A498LLD3		tjp3	A0A498MUR5
ap2s1	A0A498M0T3		exosc4	A0A498N898		fnta	A0A498NBL9		spcs3	A0A498LC14		qdpr	A0A498M4G6		rtn4	A0A498N4P6		arl6ip5	A0A498N5E0		acy1	A0A498N1Q7		ampd1	A0A498LYA9		mgat4b	A0A498N4K6		akt2	A0A498MFH8		rdh14	A0A498N127		cog5	A0A498P104		AGO4	A0A498N3A3
trappc4	A0A498M0T9		cpne3	A0A498N8C4		sh3glb1	A0A498M723		banf1	A0A498MYH6		cmbl	A0A498LJP4		glipr2	A0A498NDJ7		EML4	A0A498MVJ2		apmap	A0A498NDS9		hexa	A0A498MFZ0		capn11	A0A498LZE6		l3mbtl1	A0A498MXA6		mri1	A0A498N520		syf2	A0A498LLY0		AGO1	A0A498MHI7
hspa13	A0A498LQ86		cisd1	A0A498N8E5		srl	A0A498MXC3		hint1	A0A498LW95		CUTA	A0A498NKY3		cotl1	A0A498N767		prx	A0A498NNA6		ALPK1	A0A498NF89		FBN3	A0A498MW06		CAPN1	A0A498MPI7		RHEB	A0A498M6L4		acsl1	A0A498LDW3		tnni1	A0A498MJC0		kcmf1	A0A498ME58
pdia6	A0A498LDE8		vdac1	A0A498N8F6		folh1b	A0A498MU97		RHEB	A0A498M6L4		zar1	A0A498M6M7		C11orf65	A0A498N5G5		lta4h	A0A498N9T1		rpia	A0A498MZ96		SNTB2	A0A498NEB7		VWA5A	A0A498LRS0		rhebl1	A0A498MTE3		nid2	A0A498LTT6		purg	A0A498LUM9		sod2	A0A498LKV8
pkd1l1	A0A498LFD6		GLOD5	A0A498N8L5		RYR2	A0A498LMF6		gpx7	A0A498LMD6		pcmt1	A0A498MN94		pfn2	A0A498LY02		sh3kbp1	A0A498MIB9		vil1	A0A498LRR3		kctd8	A0A498N8G3		ttc25	A0A498LWD3		sdcbp	A0A498LUF9		cbr1	A0A498NJN0		nans	A0A498MGP0		mccc1	A0A498MVF3
p4hb	A0A498M105		acmsd	A0A498N8L8		ubtf	A0A498LZ18		rhebl1	A0A498MTE3		ppid	A0A498LWH4		txndc17	A0A498LEU3		kng1	A0A498MUT8		epcam	A0A498MSX6		adk	A0A498N453		mccc1	A0A498MVF3		sirt5	A0A498LB15		RAP1GDS1	A0A498NIT8		gclc	A0A498MZ28		dctn2	A0A498NC63
pdia3	A0A498MDR7		C18orf32	A0A498N8N2		RGPD5	A0A498MN61		casp3	A0A498N149		CALD1	A0A498MUT6		nhp2l1	A0A498MA66		ARPIN	A0A498MAU7		grhpr	A0A498N971		PLEKHO2	A0A498ND87		eml2	A0A498LHW8		nlgn2a	A0A498NDY4		mprip	A0A498L463		tsta3	A0A498NTX3		vrk3	A0A498MQK5
txndc5	A0A498NBH4		tmed7	A0A498N8R8		neb	A0A498N3Y5		ssb	A0A498NSJ3		alox5	A0A498MWJ2		plau	A0A498N806		MARC2	A0A498LSC4		GLOD5	A0A498N8L5		lcp2	A0A498LG89		maob	A0A498N7T6		nme4	A0A498NNX8		hapln3	A0A498MJW1		tmem30a	A0A498M1P6		rdh14	A0A498N127
pdia5	A0A498NHN2		tpi1	A0A498N8T4		cpe	A0A498L8V7		lta4h	A0A498N9T1		fah	A0A498NA62		habp2	A0A498LPN2		hibch	A0A498NHU6		arpc5	A0A498LDJ8		dysf	A0A498MY48		atad3a	A0A498MCP4		mfap2	A0A498M8B4		anxa4	A0A498M537		FDFT1	A0A498NS48		rbks	A0A498MFU8
dr1	A0A498M116		ahcyl1	A0A498N8Y0		dip2a	A0A498LHS4		emid1	A0A498NJN8		fasn	A0A498LY61		f10	A0A498MBE1		helb	A0A498MK68		add2	A0A498NGA5		PHKA2	A0A498NR97		ndrg4	A0A498MQ33		nt5dc3	A0A498MJV1		calcoco2	A0A498LCL9		mettl1	A0A498NJD8		syf2	A0A498LLY0
ca5a	A0A498M135		rab8a	A0A498N908		xrcc5	A0A498MC33		ncoa5	A0A498L5N0		apeh	A0A498MLK0		C19orf70	A0A498NH70		BCHE	A0A498NT31		srsf9	A0A498MHG4		gstp1	A0A498NEU1		ndrg2	A0A498LFM0		nt5dc2	A0A498N2V7		sh3kbp1	A0A498MIB9		anxa4	A0A498M537		prkab1	A0A498NSQ4
eif2b5	A0A498M148		shmt2	A0A498N951		ptprc	A0A498NTG3		txndc12	A0A498NUQ3		psmd5	A0A498NGP6		col6a1	A0A498NRY6		cpeb1	A0A498M8V5		mlec	A0A498MDW3		lamb2	A0A498L2K9		bsg	A0A498NT52		arhgap35	A0A498LZX9		EFTUD1	A0A498NA71		tbxas1	A0A498MSU3		sh3glb2	A0A498LRN4
ptpn23	A0A498M163		grhpr	A0A498N971		rae1	A0A498N8H1		apoe	A0A498LT17		SSH3	A0A498LKX2		tf	A0A498N853		C19orf66	A0A498N6Z3		mars	A0A498NF02		eif5b	A0A498N8A7		khdrbs1	A0A498LVV4		FAM188B	A0A498NSY8		polr2a	A0A498LS48		ampd1	A0A498LYA9		slu7	A0A498N4V5
MVB12A	A0A498M174		slc25a5	A0A498N9E0		pdcd6	A0A498MR44		cfi	A0A498LKR5		polb	A0A498NHX9		dlg5	A0A498LL74		ptx3	A0A498MTN1		rbp7	A0A498LV21		myef2	A0A498M698		plch2	A0A498LWN1		strn3	A0A498MVV8		pgm5	A0A498MBC1		DHRS2	A0A498MT19		kiaa0020	A0A498NDT6
c8a	A0A498M176		zmiz2	A0A498N9I9		mat2b	A0A498LGG2		fgg	A0A498LEH5		KIF25	A0A498MHB2		hspg2	A0A498LVR7		olfml3	A0A498ML14		prss16	A0A498MU91		dym	A0A498NRL9		idh3g	A0A498MYZ3		camkv	A0A498LBD9		eif2b2	A0A498NKP3		hexa	A0A498MFZ0		nfic	A0A498NRG7
zc2hc1a	A0A498M1B4		EIF3L	A0A498N9L1		vasp	A0A498MD67		prelp	A0A498MSP0		itga1	A0A498MJY7		PHKA2	A0A498NR97		CNDP1	A0A498L9Z2		ehhadh	A0A498NB48		dnajc10	A0A498N9F6		rusc1	A0A498M085		caskin1	A0A498NMV1		SPIDR	A0A498MSK4		crat	A0A498MJ07		mettl1	A0A498NJD8
kpna4	A0A498M1B8		cct6a	A0A498N9P4		reep5	A0A498M3F5		DHRS2	A0A498MT19		sart3	A0A498NGA8		neb	A0A498N3Y5		slc3a1	A0A498N651		rbp4	A0A498LVA3		nt5dc3	A0A498MJV1		mri1	A0A498N520		stxbp2	A0A498L8H8		arhgdia	A0A498LI33		c3	A0A498LT59		ncald	A0A498LGU7
kpna3	A0A498NKE3		esd	A0A498N9Q6		ELOA	A0A498MX46		hgd	A0A498N1P6		tgm1	A0A498LCV7		srsf11	A0A498MNI0		fah	A0A498NA62		lamtor3	A0A498MDH4		lgi1	A0A498LX10		stoml2	A0A498MJ13		smyd1	A0A498N386		cotl1	A0A498N767		GANC	A0A498LWU4		HPCAL1	A0A498LDM3
nubp1	A0A498M1C0		lta4h	A0A498N9T1		thoc2	A0A498N4Z9		omp	A0A498NUR6		clgn	A0A498MT53		lta4h	A0A498N9T1		dcps	A0A498MCN8		bcmo1	A0A498MCU0		psmb2	A0A498MZP1		bckdk	A0A498MP23		gas7	A0A498NHR7		kyat1	A0A498LQ81		etnppl	A0A498MH48		nampt	A0A498NA34
sdha	A0A498M1C7		pdlim4	A0A498N9T2		AP3S1	A0A498NA52		dbi	A0A498LFM5		pitrm1	A0A498L3Z8		nap1l4	A0A498L642		gart	A0A498MHY3		timm8b	A0A498LTE7		me1	A0A498NJ16		cryl1	A0A498MAL2		dmxl2	A0A498MVT5		anxa1	A0A498NJQ3		dysf	A0A498MY48		eif4enif1	A0A498L6B4
pigs	A0A498M1D4		stk26	A0A498N9U1		agk	A0A498MDE3		popdc2	A0A498NDV3		aspscr1	A0A498MRG9		me3	A0A498NAP3		tsfm	A0A498L5Y4		erap2	A0A498MIP9		pls1	A0A498NV44		armc1	A0A498N9N0		gabra1	A0A498N2V5		snx7	A0A498NDM4		capza1	A0A498MN53		kif3a	A0A498NSU4
limd1	A0A498M1F2		nampt	A0A498NA34		celf1	A0A498MDW1		agt	A0A498N0U2		rangap1	A0A498LRL2		lum	A0A498ML95		zpr1	A0A498LUF5		upp1	A0A498MVF6		mmp2	A0A498MP00		tat	A0A498MY15		nrf1	A0A498M9K6		mbd2	A0A498MQ22		pdia6	A0A498LDE8		grk1	A0A498M6W2
FAM114A2	A0A498M1F3		fam114a1	A0A498NA38		pdp1	A0A498NFJ7		hpd	A0A498NED6		dync1i2	A0A498LP67		serpinh1	A0A498LQN4		hspa12a	A0A498P302		bin2	A0A498LAU9		asap2	A0A498MDM1		dyrk4	A0A498MTT4		nprl3	A0A498NFT9		gfpt2	A0A498LPI3		txndc5	A0A498NBH4		optn	A0A498MZW6
nudt2	A0A498M1G4		AP3S1	A0A498NA52		stk3	A0A498N086		alad	A0A498MB86		rpa1	A0A498LHR7		anxa1	A0A498NJQ3		ankrd55	A0A498LW93		abcb11	A0A498MNE8		rpl22l1	A0A498MCU8		vdac3	A0A498NI22		myl7	A0A498M2W3		sh3pxd2b	A0A498NCE2		TTN	A0A498NZ39		pdp1	A0A498NFJ7
eif4h	A0A498M1G8		fah	A0A498NA62		stk10	A0A498N8G4		cpox	A0A498NRK2		pgm5	A0A498MBC1		dhrs13	A0A498LHI3		cttn	A0A498LTW8		slc30a7	A0A498MUC9		bdh1	A0A498LTZ8		pdxk	A0A498LCE5		tbc1d9	A0A498LLX3		xrn2	A0A498NK02		hectd1	A0A498MVB8		gstp1	A0A498NEU1
aadac	A0A498M1J0		atp5f1	A0A498NAE3		CNDP1	A0A498LAC0		apobec2	A0A498MYI0		UBXN4	A0A498P3E8		myl1	A0A498NHU8		serpine1	A0A498MMU1		ptplad1	A0A498MFV3		bccip	A0A498LU12		osgep	A0A498N1Z5		DCX	A0A498NMA4		wdr61	A0A498LAT7		gstp1	A0A498NEU1		unc119b	A0A498M894
tmem30a	A0A498M1P6		dbnl	A0A498NAE7		ccdc88c	A0A498LRY7		MPST	A0A498NM22		shbg	A0A498LBR0		spcs3	A0A498LC14		BCKDHB	A0A498ME07		plaa	A0A498NVE1		usp14	A0A498N6B6		nudt5	A0A498N717		rdh14	A0A498N127		pvalb	A0A498LE30		eif5b	A0A498N8A7		lamb2	A0A498L2K9
aldh6a1	A0A498M1U7		me3	A0A498NAP3		gmppb	A0A498M3E5		gabrd	A0A498M145		hexdc	A0A498LRC0		ssb	A0A498NSJ3		sec31b	A0A498LU62		eif5b	A0A498N8A7		pgm3	A0A498N0K6		cpa1	A0A498NWE3		mri1	A0A498N520		ATXN3	A0A498MT57		nfyc	A0A498MZI8		wdr11	A0A498MKV0
exoc5	A0A498M1V8		pdcd6ip	A0A498NAQ7		cryz	A0A498P4F6		auh	A0A498LUF6		kiaa1715	A0A498LG57		emid1	A0A498NJN8		eci2	A0A498M2P5		ganab	A0A498N589		ndufa6	A0A498MHB9		CPA3	A0A498LWH2		glrx3	A0A498LFT5		tbl1xr1	A0A498MPR5		insr	A0A498NNJ9		HSPA4L	A0A498LWX6
scin	A0A498MSB3		atp5o	A0A498NAQ8		PDPR	A0A498LTV8		ech1	A0A498NP92		lnpb	A0A498NNC2		mpdu1	A0A498MP58		praf2	A0A498MFZ8		phex	A0A498MJE5		zmiz2	A0A498N9I9		anp32e	A0A498N3E4		nid2	A0A498LTT6		limd1	A0A498M1F2		mfn1	A0A498MRK5		dhrs12	A0A498N7U4
gsn	A0A498NKF8		TPMT	A0A498NAT0		CALD1	A0A498MUT6		eci1	A0A498MX93		ddi2	A0A498L5Z7		gyg1	A0A498P2U5		TSTD1	A0A498NUI3		ufl1	A0A498MAA7		rdh12	A0A498LUW8		atp6v1d	A0A498NK38		cdh11	A0A498M0B0		hsd17b12	A0A498MW42		lgi1	A0A498LX10		naa40	A0A498MKV5
uba2	A0A498M1Y0		dcxr	A0A498NAW3		chmp2a	A0A498LNM5		wrb	A0A498NQE4		hnrnph1	A0A498ND79		txndc12	A0A498NUQ3		gpx7	A0A498LMD6		FAM114A2	A0A498M1F3		eya3	A0A498MNH3		anxa10	A0A498MXP6		fcho2	A0A498NEP2		MYO1D	A0A498LMR6		psmb2	A0A498MZP1		lgi1	A0A498LX10
mrpl37	A0A498M1Y5		igf2bp3	A0A498NAX1		tagln3	A0A498NRS5		csrp3	A0A498LSX4		blmh	A0A498LH75		dcn	A0A498M9M2		snx29	A0A498L965		chdh	A0A498M851		akt2	A0A498MFH8		cops7a	A0A498LG70		hapln3	A0A498MJW1		stxbp2	A0A498L8H8		pls1	A0A498NV44		C7orf25	A0A498LNR8
nr2c2	A0A498M1Y9		mpc2	A0A498NAY0		RBM12	A0A498MKR7		myl7	A0A498M2W3		sirt2	A0A498NP11		prelp	A0A498MSP0		arl9	A0A498N6B9		dpys	A0A498L4W1		l3mbtl1	A0A498MXA6		nqo1	A0A172E1Q5		aldh9a1	A0A498NRW6		nans	A0A498MGP0		setd3	A0A498LKG2		appl1	A0A498LQ34
GPR108	A0A498M207		rpe	A0A498NB21		osbpl9	A0A498NRA2		cpo	A0A498NF92		esd	A0A498N9Q6		fgg	A0A498LEH5		rbp7	A0A498LV21		grm2	A0A498LDH3		ECE2	A0A498LV26		sirt5	A0A498LB15		banf1	A0A498MYH6		gulp1	A0A498NHU0		rpl22l1	A0A498MCU8		bdh1	A0A498LTZ8
GFOD1	A0A498M209		susd5	A0A498NB89		gripap1	A0A498NEL2		sag	A0A498MCQ3		galm	A0A498N834		SH3BGRL	A0A498LJ34		sri	A0A498LG84		lman1	A0A498LJT3		nudt2	A0A498M1G4		yjefn3	A0A498MU63		camk4	A0A498M9Q6		kctd12	A0A498MFH0		sec13	A0A498MAC6		ankrd28	A0A498LBT4
NEBL	A0A498M216		ndufa10	A0A498NBA5		dhx8	A0A498LPF1		dpep1	A0A498M9G6		twf1	A0A498NTA0		DHRS2	A0A498MT19		lamp2	A0A498LL15		hbs1l	A0A498MLX6		RHEB	A0A498M6L4		psmg1	A0A498MHM4		sept5	A0A498LUE9		plcg2	A0A498N7Z4		bdh1	A0A498LTZ8		usp14	A0A498N6B6
pfdn4	A0A498M237		STXBP6	A0A498NBA6		cdc40	A0A498NTM9		ndrg4	A0A498MQ33		sgpl1	A0A498MUV0		plek2	A0A498LR71		ndufa5	A0A498MSQ9		cyp1a	A0A498MGE6		rhebl1	A0A498MTE3		gstm3	A0A498LT46		PCYOX1L	A0A498LC68		VAV1	A0A498NLB1		mia3	A0A498NSQ6		gabpa	A0A498N461
psmb9	A0A498M262		hspd1	A0A498NBD6		rrm2b	A0A498MVN7		ALPK1	A0A498NF89		lactb2	A0A498NT66		agt	A0A498N0U2		BOLA2B	A0A498NTF7		gmppa	A0A498NPA3		sdcbp	A0A498LUF9		pgam5	A0A498NGG7		homer1	A0A498MIQ6		lcp2	A0A498LG89		cryl1	A0A498MAL2		acat1	A0A498MP51
omg	A0A498M264		rpl13a	A0A498NBD8		SPIN1	A0A498L967		rpia	A0A498MZ96		tpd52	A0A498MLK3		hpd	A0A498NED6		hps4	A0A498LCF8		fah	A0A498NA62		sirt5	A0A498LB15		ndufv2	A0A498N051		fam3a	A0A498NCR7		pik3r2	A0A498P4Y1		gpx4	A0A498MGM1		ndufa6	A0A498MHB9
vps11	A0A498M267		serpinb1	A0A498NBE7		mrpl16	A0A498MB56		grhpr	A0A498N971		enoph1	A0A498LUE7		cpox	A0A498NRK2		crip1	A0A498LGM3		agxt	A0A498L8H1		rasal3	A0A498NPU9		atp5o	A0A498NAQ8		nup160	A0A498NYB9		mmp2	A0A498MP00		atl2	A0A498MSY1		drg2	A0A498M5H6
parvb	A0A498M273		bmp6	A0A498NBG7		stam2	A0A498NI83		lamp2	A0A498LL15		apoa1bp	A0A498M809		clpp	A0A498N353		dnajc12	A0A498LNK7		amt	A0A498MMV2		nup210	A0A498MU58		atp5f1	A0A498NAE3		pgm5	A0A498MBC1		C6orf136	A0A498MGC5		bccip	A0A498LU12		prr14	A0A498NP39
snx30	A0A498M295		txndc5	A0A498NBH4		vdac3	A0A498NI22		epcam	A0A498MSX6		pmpca	A0A498N1I4		eci1	A0A498MX93		bmi1	A0A498LC72		hao1	A0A498MC15		mfap2	A0A498M8B4		cryba2	A0A498NN55		arhgdia	A0A498LI33		mcm3ap	A0A498NI93		usp14	A0A498N6B6		eya3	A0A498MNH3
sec31b	A0A498LU62		psmb4	A0A498NBJ4		cttn	A0A498LTW8		pwp1	A0A498N9D0		amt	A0A498MMV2		gmppb	A0A498M3E5		ndufa12	A0A498L9Q3		phyh	A0A498N3X7		plxna4	A0A498M9K4		crybb2	A0A498P1P5		FHOD1	A0A498MWH3		pdlim1	A0A498NZA9		ndufa6	A0A498MHB9		l3mbtl1	A0A498MXA6
sec31a	A0A498M2A4		abat	A0A498NBJ5		mapk8ip3	A0A498M6J7		GLOD5	A0A498N8L5		fnta	A0A498NBL9		gns	A0A498MSP6		lrrc17	A0A498M9T9		helb	A0A498MK68		fbxo45	A0A498M519		gpx1	A0A498NS09		ctsz	A0A498LKT3		gmps	A0A498LQI3		zmiz2	A0A498N9I9		fnta	A0A498NBL9
fut10	A0A498M2D5		fnta	A0A498NBL9		CEP192	A0A498LC83		rnps1	A0A498NUH6		nup35	A0A498NE60		apmap	A0A498NDS9		hexdc	A0A498LRC0		nat1	A0A498M4Z9		galnt7	A0A498LGC3		abhd14b	A0A498L5N4		apex1	A0A498MXE5		PHKA2	A0A498NR97		rdh12	A0A498LUW8		recql	A0A498MAC3
smyd1	A0A498M2F7		gnat2	A0A498NBP1		plxnb2	A0A498LIG6		ap1s2	A0A498NJR7		hibadha	A0A498MZS1		ALPK1	A0A498NF89		PTGFRN	A0A498LFK1		hyi	A0A498MHW3		ANKRD13D	A0A498LZB6		tsn	A0A498NEX9		anxa1	A0A498NJQ3		hspa12b	A0A498NUL7		eps8l2	A0A498LRM9		nudt2	A0A498M1G4
nup214	A0A498M2G5		atic	A0A498NBQ9		stag2	A0A498NTM3		rwdd4	A0A498NVA3		hdhd1	A0A498L319		rpia	A0A498MZ96		wdfy1	A0A498MRK7		sccpdh	A0A498N3L1		ppie	A0A498N6L6		ykt6	A0A498N3I9		polb	A0A498NHX9		clic2	A0A498LIJ7		nudt2	A0A498M1G4		CUL7	A0A498MUU2
pcyt1b	A0A498M2N7		psmc6	A0A498NBU2		macf1	A0A498LAN4		arpc5	A0A498LDJ8		uchl1	A0A498MUF4		lamp2	A0A498LL15		ttc9c	A0A498MXS1		srprb	A0A498M7U4		upp1	A0A498MVF6		rbp4	A0A498LVA3		myo5b	A0A498MYA4		clic1	A0A498MCJ8		atp6v1c1	A0A498N769		atp6v1c1	A0A498N769
rpl5	A0A498M2R0		tnmd	A0A498NBV8		nudt3	A0A498L6E0		srsf9	A0A498MHG4		pds5a	A0A498N1E0		rnps1	A0A498NUH6		fhl3	A0A498NIJ0		sptlc2	A0A498NKS8		SMPD2	A0A498L8M4		mrpl24	A0A498M3K3		leprel2	A0A498N527		KCNS1	A0A498N8G2		sirt5	A0A498LB15		sdcbp	A0A498LUF9
tapbp	A0A498M2R2		ilf2	A0A498NBZ6		phkb	A0A498M8P5		dpp7	A0A498LRS8		habp2	A0A498NEC0		ap1s2	A0A498NJR7		SCO1	A0A498MKC8		ak4	A0A498NVU3		TTN	A0A498NZ39		tpt1	A0A498L311		gabpa	A0A498N461		slc25a24	A0A498MBM2		nme4	A0A498NNX8		sec13	A0A498MAC6
LRG1	A0A498M2U1		c8b	A0A498NBZ9		tmod3	A0A498N4C6		mlec	A0A498MDW3		ik	A0A498NA94		dpp7	A0A498LRS8		c1qbp	A0A498NKL6		qdpr	A0A498M4G6		mark2	A0A498MQB9		atp5h	A0A498LBS5		gsn	A0A498NKF8		pin1	A0A498NLG8		tm7sf2	A0A498LF12		sirt5	A0A498LB15
xylb	A0A498M2V1		ndufa2	A0A498NC16		PMM1	A0A498MHX8		denr	A0A498N0M9		rabggta	A0A498LQJ1		mlec	A0A498MDW3		C12orf10	A0A498NJE4		TPMT	A0A498NAT0		epn2	A0A498LCD7		FTHL17	A0A498M9Z8		atp1b4	A0A498LPV3		ERP27	A0A498NL60		mfap2	A0A498M8B4		hace1	A0A498LRP6
myl7	A0A498M2W3		aimp2	A0A498NC19		efr3a	A0A498NS71		akr1a1	A0A498NTT9		vps45	A0A498NAP9		rtn4ip1	A0A498N9R5		sod3	A0A498MH86		fahd1	A0A498MF21		epn3	A0A498NZ28		cnbp	A0A498NJ76		pacs1	A0A498MS15		amt	A0A498MMV2		plxna4	A0A498M9K4		pdgfrb	A0A498N9F4
pum2	A0A498M301		nefm	A0A498NC53		praf2	A0A498MFZ8		pcnx	A0A498LHW1		tes	A0A498MJX4		denr	A0A498N0M9		nudt5	A0A498N717		gstz1	A0A498LVZ9		ppp2r5a	A0A498NFZ8		sri	A0A498LG84		tsn	A0A498NEX9		slc25a20	A0A498MA61		arhgap35	A0A498LZX9		arhgap35	A0A498LZX9
stac3	A0A498M317		rai14	A0A498NC59		PLEKHO2	A0A498ND87		rbp4	A0A498LVA3		stk38l	A0A498MER8		akr1a1	A0A498NTT9		mgst1	A0A498MIW9		spcs2	A0A498LTL5		fam63a	A0A498M7K8		copz1	A0A498LTD9		DHX35	A0A498MG05		echdc2	A0A498MNP2		galns	A0A498ML35		DHX29	A0A498M5L2
ran	A0A498M343		dctn2	A0A498NC63		rangap1	A0A498LRL2		prss16	A0A498MU91		ttc8	A0A498P2S9		psme1	A0A498N022		abhd14b	A0A498L5N4		AMDHD1	A0A498MXR7		sesn2	A0A498N280		rtn4	A0A498N4P6		kntc1	A0A498LQH0		PPA2	A0A498NX57		epn2	A0A498LCD7		cnot3	A0A498NIT1
arhgap15	A0A498NEN6		pck1	A0A498NC69		gopc	A0A498LI52		ftcd	A0A498NAW2		TPPP	A0A498MZQ7		ctnnd1	A0A498MKM0		apoa1	A0A498MYF5		manf	A0A498MIU3		PXDN	A0A498MV74		cryab	A0A498M948		adar	A0A498LYN1		scamp1	A0A498NR13		epn3	A0A498NZ28		nde1	A0A498NMS4
rbsn	A0A498M352		akap12	A0A498NCA7		rbm25	A0A498NKE7		mpc2	A0A498NAY0		ktn1	A0A498LSE6		prss16	A0A498MU91		RASGRF1	A0A498MIZ1		acbd5	A0A498LTW2		mtmr9	A0A498L1P6		tmco1	A0A498NRB8		pvalb	A0A498LE30		arl6ip5	A0A498N5E0		lgals3bp	A0A498M3M0		wdr92	A0A498LZT4
prrc1	A0A498M377		clic4	A0A498NCC7		ublcp1	A0A498LRX4		plaa	A0A498NVE1		ppl	A0A498NI43		rbp4	A0A498LVA3		ndufb8	A0A498LKL7		dap	A0A498NSA5		myom2	A0A498N3K3		dgkz	A0A498N004		NFKB1	A0A498N7Y1		akap12	A0A498NCA7		fam63a	A0A498M7K8		smg8	A0A498MUH1
mep1b	A0A498M3B5		rpl23a	A0A498NCC9		AP3B1	A0A498M1W5		ganab	A0A498N589		map1s	A0A498MS83		ftcd	A0A498LNN9		ndufb3	A0A498LJ72		CUTA	A0A498NKY3		DCX	A0A498NMA4		ppih	A0A498M607		nt5c3a	A0A498LIJ6		slc44a2	A0A498NP49		nprl3	A0A498NFT9		mad2l1	A0A498P3E9
TRAPPC8	A0A498M3C1		prdx5	A0A498NCD5		ppcs	A0A498MSK6		sardh	A0A498MXH8		uggt1	A0A498NGH7		mpc2	A0A498NAY0		mbnl2	A0A498P3P4		FAAH	A0A498NS72		abcc9	A0A498MFD9		prdx5	A0A498NCD5		ATXN3	A0A498MT57		prrt2	A0A498LBU4		tm9sf4	A0A498LVS5		dnajb1	A0A498MBS7
sptlc1	A0A498M3D1		sh3pxd2b	A0A498NCE2		dync1li2	A0A498LWA9		uso1	A0A498NFH4		gba2	A0A498MJL2		ass1	A0A498MVZ3		f10	A0A498MBE1		zar1	A0A498M6M7		crat	A0A498MJ07		atp6v1g1	A0A498M939		pfdn1	A0A498NYC1		tnc	A0A498NLK0		myom2	A0A498N3K3		ppp2r5a	A0A498NFZ8
reep5	A0A498M3F5		rplp0	A0A498NCF3		mapk14	A0A498NV34		h6pd	A0A498LNH7		ERAP1	A0A498NJS0		slc30a7	A0A498MUC9		cd59	A0A498MK06		pcmt1	A0A498MN94		casp6	A0A498NPC7		glipr2	A0A498NDJ7		hsd17b12	A0A498MW42		gpc1	A0A498N4S2		pcsk1	A0A498LJS5		sesn2	A0A498N280
clec3b	A0A498M3J2		csnk1a1	A0A498NCK2		mylk	A0A498LFS7		ctnnd1	A0A498MKM0		osbp	A0A498LL08		agpat3	A0A498NKN5		ctsc	A0A498N5Q8		akr1a1	A0A498NTT9		mri1	A0A498N520		pvalb	A0A498LE30		xab2	A0A498N3W7		TPP2	A0A498M7L0		casp6	A0A498NPC7		nprl3	A0A498NFT9
prcc	A0A498M3J3		lck	A0A498NCM9		mapk12	A0A498LTL2		pdia5	A0A498NHN2		ankfy1	A0A498LYZ7		plaa	A0A498NVE1		capn9	A0A498LPN1		piwil1	A0A498M5S1		glrx3	A0A498LFT5		pfn2	A0A498LY02		nans	A0A498MGP0		HEPHL1	A0A498LGH5		nid2	A0A498LTT6		tdrd9	A0A498M970
pvrl1	A0A498M3K4		hmgcl	A0A498NCN4		ganab	A0A498N589		hbs1l	A0A498MLX6		sardh	A0A498MXH8		tpr	A0A498LDV6		hpd	A0A498MBR0		aldh18a1	A0A498LMW6		acsl1	A0A498LDW3		fkbp1a	A0A498LWN3		macf1	A0A498LAN4		cog2	A0A498N102		pik3r1	A0A498MKL0		kbtbd8	A0A498MLP7
dse	A0A498M3M7		zmpste24	A0A498NCP1		aarsd1	A0A498LUG3		helb	A0A498MK68		fkbp9	A0A498N0E3		tmem214	A0A498LN85		mrpl4	A0A498LRL5		dapl1	A0A498M7T0		nid2	A0A498LTT6		txndc17	A0A498LEU3		dock4	A0A498N1S5		add2	A0A498NGA5		acox3	A0A498NTH1		otud4	A0A498NQT6
robo1	A0A498M3V6		fam3a	A0A498NCR7		pacs1	A0A498MS15		phyhd1	A0A498NQ68		exoc4	A0A498MEI4		lman1	A0A498LJT3		gpa33	A0A498MBQ2		nasp	A0A498NUH2		fcho2	A0A498NEP2		acot13	A0A498MLJ8		ppie	A0A498N6L6		mgat4b	A0A498N4K6		helb	A0A498MK68		slit2	A0A498MYJ2
mipep	A0A498M3V9		cops8	A0A498ND37		mtmr9	A0A498L1P6		sdr16c5	A0A498NIH3		sel1l	A0A498N1D0		hbs1l	A0A498MLX6		psmg1	A0A498MHM4		zar1l	A0A498L7Q6		thoc7	A0A498LFQ3		fkbp2	A0A498N4H0		zmiz2	A0A498N9I9		capn11	A0A498LZE6		sdcbp	A0A498LUF9		pgm2l1	A0A498MCX4
hn1	A0A498M3Y4		rpl26l1	A0A498ND70		atl2	A0A498MSY1		khk	A0A498MZI9		clint1	A0A498LHC0		helb	A0A498MK68		DPEP3	A0A498MN92		NAGK	A0A498NUS0		hapln3	A0A498MJW1		SH3BGRL	A0A498LJ34		ppif	A0A498LM82		CAPN1	A0A498MPI7		gpt	A0A498NM13		nid2	A0A498LTT6
ybx1	A0A498LW12		guk1	A0A498NDD0		marcks	A0A498M4I1		ak4	A0A498NVU3		tnc	A0A498NLK0		sccpdh	A0A498N3L1		acot13	A0A498MLJ8		cnn2	A0A498P452		PCYOX1L	A0A498LC68		plau	A0A498N806		C6orf136	A0A498MGC5		scarb2	A0A498M7K2		PCYOX1L	A0A498LC68		hspg2	A0A498LVR7
YBX2	A0A498M3Z6		chuk	A0A498NDH5		arl15	A0A498MXK1		dcxr	A0A498NAW3		sec31b	A0A498LU62		MARC2	A0A498LSC4		npc2	A0A498LSC6		arhgdia	A0A498LI33		pcyt1a	A0A498N083		f10	A0A498MBE1		mcm3ap	A0A498NI93		VWA5A	A0A498LRS0		upp2	A0A498LNV1		vps16	A0A498NNY5
dnajc8	A0A498M409		impdh2	A0A498NDI4		syn2	A0A498NJI5		qdpr	A0A498M4G6		asns	A0A498M0X4		spcs2	A0A498LTL5		tnn	A0A498MVF0		gpn3	A0A498NKJ5		emc2	A0A498LFR4		habp2	A0A498LPN2		stat4	A0A498NHR6		plxnb2	A0A498LIG6		tbl2	A0A498NA28		mettl13	A0A498NVP3
slc6a5	A0A498M429		itga8	A0A498NDJ2		enah	A0A498M036		TPMT	A0A498NAT0		pkp3	A0A498L903		pcmt1	A0A498MN94		etfdh	A0A498LWE7		pls1	A0A498NV44		anxa4	A0A498M537		mif	A0A498LWI4		adss	A0A498LEX5		ttc25	A0A498LWD3		cul1	A0A498LED4		PCYOX1L	A0A498LC68
slc12a2	A0A498M441		glipr2	A0A498NDJ7		rabgap1	A0A498MNK2		gstz1	A0A498LVZ9		gga1	A0A498N338		dhodh	A0A498MA59		sypl2	A0A498NS18		ppil1	A0A498LDE1		calcoco2	A0A498LCL9		C19orf70	A0A498NH70		pdlim1	A0A498NZA9		eml2	A0A498LHW8		foxk1	A0A498L533		pcyt1a	A0A498N083
slc12a1	A0A498MB35		arhgef1	A0A498NDL5		kif3a	A0A498NSU4		CUTA	A0A498NKY3		drg1	A0A498NSN9		piwil1	A0A498M5S1		smyd1	A0A498M2F7		pip4k2a	A0A498L6U4		sh3kbp1	A0A498MIB9		col6a6	A0A498LVS1		adi1	A0A498N2V1		maob	A0A498N7T6		SNTB2	A0A498NEB7		eif2b5	A0A498M148
g6pc	A0A498M446		apmap	A0A498NDS9		cadm1	A0A498N1X4		CALD1	A0A498MUT6		wapal	A0A498NCJ1		rpl14	A0A498N3B3		murc	A0A498NTA9		psmd5	A0A498NGP6		elmo1	A0A498N309		col6a1	A0A498NRY6		FRG1	A0A498MUB4		wdr37	A0A498LWI2		ppm1g	A0A498N7H5		LSM5	A0A498NM02
eif2b4	A0A498M459		ugt1a1	A0A498NDU4		arrb2	A0A498MMT3		myoz2	A0A498NJH4		vps53	A0A498LXI9		eif4enif1	A0A498L6B4		ppm1a	A0A498MDX5		SSH3	A0A498LKX2		fam3a	A0A498NCR7		tf	A0A498N853		hspa12b	A0A498NUL7		bsg	A0A498NT52		mthfr	A0A498LZK0		ppat	A0A498MRN1
bcl10	A0A498M4A4		erlin1	A0A498NDY9		pspc1	A0A498NAL8		pcmt1	A0A498MN94		bcas3	A0A498LQB6		CASR	A0A498LFT2		rtn4ip1	A0A498N9R5		ethe1	A0A498LA32		pgm5	A0A498MBC1		ND1	H9C4W4		blmh	A0A498LH75		khdrbs1	A0A498LVV4		arhgdia	A0A498LI33		COQ5	A0A498NGF1
ccbl2	A0A498M4C1		uba5	A0A498NDZ0		agap1	A0A498MTB7		ttc25	A0A498LWD3		eif2b4	A0A498M459		dapl1	A0A498M7T0		rchy1	A0A498MK23		KIF25	A0A498MHB2		arhgdia	A0A498LI33		dlg5	A0A498LL74		nup133	A0A498LQR3		coch	A0A498MVT8		ctsz	A0A498LKT3		nup210	A0A498MU58
dsp	A0A498M4C7		ltbp1	A0A498NE20		AGAP3	A0A498MXZ1		ptrh2	A0A498LH90		nup88	A0A498NMR7		nasp	A0A498NUH2		tfam	A0A498N7L4		cops7a	A0A498LG70		FHOD1	A0A498MWH3		glrx3	A0A498LFT5		psmb10	A0A498P5Y7		phgdh	A0A498MR33		gba2	A0A498MJL2		anxa4	A0A498M537
atp1a3	A0A498LG80		htra1	A0A498NE24		osbpl11	A0A498NI48		ctsc	A0A498N5Q8		palld	A0A498MDT9		galns	A0A498ML35		pdhx	A0A498M637		edc4	A0A498MLW3		micu1	A0A498MZZ5		hspg2	A0A498LVR7		adarb1	A0A498N2X6		sh3glb2	A0A498LRN4		CNOT4	A0A498LVV7		sh3kbp1	A0A498MIB9
tcap	A0A498M4E1		prkacb	A0A498NE56		get4	A0A498NRX9		tagln3	A0A498NRS5		setd3	A0A498LKG2		ptrh2	A0A498LH90		sdr39u1	A0A498NPP7		itga1	A0A498MJY7		apex1	A0A498MXE5		myom2	A0A498N3K3		mst1	A0A498L8J5		marcksl1	A0A498LYF0		apex1	A0A498MXE5		cdk7	A0A498MNJ6
SHC3	A0A498M4E5		SNTB2	A0A498NEB7		fxr1	A0A498P5C7		hspg2	A0A498LVR7		fam129a	A0A498MC09		lsm7	A0A498NBE3		znf346	A0A498LRE1		sec31b	A0A498LU62		anxa1	A0A498NJQ3		PHKA2	A0A498NR97		slc25a24	A0A498MBM2		ndrg4	A0A498MQ33		polb	A0A498NHX9		nup160	A0A498NYB9
qdpr	A0A498M4G6		habp2	A0A498NEC0		fxr2	A0A498MYT5		ppil1	A0A498LDE1		vac14	A0A498MWP3		C4orf27	A0A498MGN9		slc25a20	A0A498MA61		lars	A0A498N4V8		polb	A0A498NHX9		dcn	A0A498M9M2		git1	A0A498LQL3		plch2	A0A498LWN1		cpsf6	A0A498N6E3		pgm5	A0A498MBC1
nt5dc1	A0A498M4H1		sugt1	A0A498NED4		fmr1	A0A498LNV6		fasn	A0A498LY61		ttll12	A0A498P2L1		CALD1	A0A498MUT6		adprhl2	A0A498MLM8		cse1l	A0A498MSB4		nt5e	A0A498MGU6		postn	A0A498LEZ7		bcan	A0A498NFL2		pdk1	A0A498LGU8		sdk1	A0A498L7C8		mthfr	A0A498LZK0
lpcat1	A0A498M4H6		btf3	A0A498NED9		ggps1	A0A498LNH9		apoa1bp	A0A498M809		gss	A0A498NGE2		plg	A0A498MP37		srp72	A0A498N220		iars2	A0A498N5U1		padi2	A0A498LR20		tgfbi	A0A498NUS4		dnajc19	A0A498P3F2		sept5	A0A498LUE9		slc35b2	A0A498NKD5		cotl1	A0A498N767
marcks	A0A498M4I1		erp44	A0A498NEK6		ptk2	A0A498NIH1		ethe1	A0A498LA32		exoc2	A0A498N335		tdrd1	A0A498LSJ7		ccdc58	A0A498NRI8		apeh	A0A498MLK0		pacs1	A0A498MS15		lta4h	A0A498N9T1		gad1	A0A498LP77		cops3	A0A498N2D1		snx7	A0A498NDM4		eif3m	A0A498NED7
rab24	A0A498M4I9		cdh17	A0A498NEK9		dock4	A0A498N1S5		KIF25	A0A498MHB2		tfrc	A0A498M1D0		apoa1bp	A0A498M809		wrb	A0A498NQE4		appl2	A0A498LHT3		clasp2	A0A498N3F4		fubp3	A0A498MUZ4		csad	A0A498LQM8		sh3gl3	A0A498LZG2		tmod3	A0A498N4C6		ctsz	A0A498LKT3
lxn	A0A498M4K7		hsd17b4	A0A498NEL9		KCTD12	A0A498LBV4		itga1	A0A498MJY7		ipo13	A0A498NKY2		psmd5	A0A498NGP6		ndufa3	A0A498M8T1		rangap1	A0A498LRL2		tsn	A0A498NEX9		lum	A0A498ML95		amt	A0A498MMV2		idh3g	A0A498MYZ3		ATXN3	A0A498MT57		kctd6	A0A498MPS9
glmn	A0A498M4M4		tfg	A0A498NEM1		mcee	A0A498L6Z5		mcm4	A0A498MW63		pofut1	A0A498M0R9		ndc1	A0A498LE50		gpx4	A0A498MGM1		dync1i2	A0A498LP67		AP3B2	A0A498LD24		shmt2	A0A498N951		sod2	A0A498LKV8		rusc1	A0A498M085		mapkapk2	A0A498MRD8		rexo2	A0A498NLD2
gabrd	A0A498M145		hars	A0A498NES3		map4k4	A0A498MQ09		nsun2	A0A498MNR7		eefsec	A0A498LDF0		edc4	A0A498MLW3		pknox1	A0A498LCK2		nploc4	A0A498LR06		sh3pxd2b	A0A498NCE2		txndc5	A0A498NBH4		slc4a1	A0A498LX14		gipc1	A0A498MKT8		hsd17b12	A0A498MW42		apex1	A0A498MXE5
dpf1	A0A498M4Q4		gnpda2	A0A498NET5		bzw1	A0A498LKG8		skiv2l2	A0A498M7N4		dph5	A0A498MGT9		itga1	A0A498MJY7		timm9	A0A498MZJ9		xrcc6	A0A498LGY5		xrn2	A0A498NK02		pdia6	A0A498LDE8		coq10b	A0A498N7V9		apex1	A0A498MXE5		vamp1	A0A498LKF6		arhgap17	A0A498L885
acvr2b	A0A498L7R7		gstp1	A0A498NEU1		igf2r	A0A498MYB9		mut	A0A498N3E3		nadk2	A0A498NC90		sec31b	A0A498LU62		coq6	A0A498LSD3		rbbp5	A0A498LBC2		gulp1	A0A498NHU0		pah	A0A498M9N5		slc25a20	A0A498MA61		psat1	A0A498MVT9		KCTD12	A0A498LBV4		anxa1	A0A498NJQ3
crygn	A0A498M4R5		tsn	A0A498NEX9		atg5	A0A498LDW8		srp68	A0A498ME85		crtap	A0A498N352		sart3	A0A498NGA8		snx9	A0A498N326		pgm5	A0A498MBC1		pvalb	A0A498LE30		RGPD5	A0A498MYX9		bpgm	A0A498M3Y5		adprh	A0A498MGA3		sptlc2	A0A498NKS8		rpa1	A0A498LHR7
hvcn1	A0A498M4S4		higd2a	A0A498NEY1		cops3	A0A498N2D1		nploc4	A0A498LR06		gpt2	A0A498MJ55		myo1c	A0A498LHU8		COQ5	A0A498NGF1		UBXN4	A0A498P3E8		hace1	A0A498LRP6		tmod4	A0A498NIP2		nipbl	A0A498MPN9		tat	A0A498MY15		pgm5	A0A498MBC1		polb	A0A498NHX9
tprg1l	A0A498M4S5		igfbp7	A0A498NEY5		prep	A0A498NK12		pgm5	A0A498MBC1		rprd1b	A0A498NRW2		pitrm1	A0A498L3Z8		mtx2	A0A498NNV7		dbnl	A0A498NAE7		smurf2	A0A498MEG6		murc	A0A498NTA9		PPA2	A0A498NX57		dyrk4	A0A498MTT4		snx8	A0A498M9Z7		leprel2	A0A498N527
adh5	A0A498MXR4		ppard	A0A498NF37		ndufa10	A0A498NBA5		ubxn1	A0A498N3S1		dnajb11	A0A498NEV1		uso1	A0A498NFH4		dync1i2	A0A498LP67		shbg	A0A498LBR0		ATXN3	A0A498MT57		fbp2	A0A498NRE8		scamp1	A0A498NR13		vdac3	A0A498NI22		pdk4	A0A498N255		dcun1d1	A0A498NTJ8
cops5	A0A498MZ60		snrpb	A0A498NF52		stk38l	A0A498MER8		blmh	A0A498LH75		tmx3	A0A498M080		mcmbp	A0A498MYU8		spast	A0A498LUY0		galk2	A0A498N6I1		TPP2	A0A498M7L0		ogn	A0A498N7R3		gja1	A0A498LPU3		PDXP	A0A498LDH5		CUL7	A0A498MUU2		cdc16	A0A498N748
pltp	A0A498M4T0		aifm1	A0A498NF81		srsf9	A0A498MHG4		ddi2	A0A498L5Z7		ptch2	A0A498MVG0		srp72	A0A498N220		FAM98C	A0A498MME2		blmh	A0A498LH75		itga2	A0A498MMA0		alad	A0A498MB86		gpr37l1	A0A498NRW3		hnrnpa0	A0A498N1Y3		ppp1r10	A0A498MTQ7		padi2	A0A498LR20
mnd1	A0A498M4T8		ALPK1	A0A498NF89		rufy2	A0A498NAH8		ccbl2	A0A498M4C1		dnajc7	A0A498M6L9		dync1i2	A0A498LP67		stam2	A0A498NI83		sirt2	A0A498NP11		hsd17b12	A0A498MW42		myoz1	A0A498N7V3		arl6ip5	A0A498N5E0		pdxk	A0A498LCE5		pdlim1	A0A498NZA9		clip2	A0A498NM65
KCNAB3	A0A498M4W3		ppp1cb	A0A498NFA7		cbr1	A0A498NJN0		bub3	A0A498LL89		mtmr9	A0A498L1P6		pes1	A0A498NG15		enoph1	A0A498LUE7		ccbl2	A0A498M4C1		gsn	A0A498NKF8		bag6	A0A498MCG5		slc32a1	A0A498NBW2		nat1	A0A498M4Z9		adi1	A0A498N2V1		clip1	A0A498LGH2
pctp	A0A498M4Z1		pabpc4	A0A498NFA9		slc12a2	A0A498M441		aimp1	A0A498LLM0		aarsd1	A0A498LUG3		xrcc6	A0A498LGY5		mtif3	A0A498MEJ9		gcdh	A0A498NU21		mcm4	A0A498MW63		dhrs13	A0A498LHI3		l1cam	A0A498LW45		cpa1	A0A498NWE3		urad	A0A498NRH3		cep170	A0A498NBR3
elac2	A0A498M4Z4		papss2	A0A498NFB2		slc12a1	A0A498MB35		snrnp40	A0A498MZK9		tmf1	A0A498MR76		shbg	A0A498LBR0		thyn1	A0A498LMI2		bpnt1	A0A498N514		pik3r2	A0A498P4Y1		hspa4	A0A498NTF6		akap12	A0A498NCA7		anp32e	A0A498N3E4		cmbl	A0A498LJP4		snx7	A0A498NDM4
syncrip	A0A498LFA4		vps4a	A0A498NFE0		wdr37	A0A498LWI2		cnn3	A0A498N571		hgs	A0A498L6D4		vrk1	A0A498LMR7		dnajc9	A0A498NT54		galm	A0A498N834		plcg2	A0A498N7Z4		crygn	A0A498M4R5		slc6a1	A0A498NJH5		atp6v1d	A0A498NK38		clic2	A0A498LIJ7		tsn	A0A498NEX9
HNRNPR	A0A498M4Z7		uso1	A0A498NFH4		arfgap3	A0A498L4B6		cnn1	A0A498LNC0		tbl2	A0A498NA28		ubr7	A0A498MXB6		esyt1	A0A498P1N8		cnn3	A0A498N571		VAV1	A0A498NLB1		spcs3	A0A498LC14		slc44a2	A0A498NP49		blvra	A0A498N0E6		clic1	A0A498MCJ8		dnajc2	A0A498N6D1
camlg	A0A498M509		bcan	A0A498NFL2		ppm1g	A0A498N7H5		dll3	A0A498LHZ4		bre	A0A498MAW6		ubxn1	A0A498N3S1		vta1	A0A498LDA8		twf1	A0A498NTA0		pik3r1	A0A498MKL0		banf1	A0A498MYH6		slc8a2	A0A498LV18		bmp6	A0A498NBG7		nup133	A0A498LQR3		AP3B2	A0A498LD24
fbxo45	A0A498M519		asrgl1	A0A498NFQ9		ahsa1	A0A498LWW5		thoc3	A0A498NUD0		hmbs	A0A498N9V5		kiaa1715	A0A498LG57		cpped1	A0A498L8L8		dll3	A0A498LHZ4		ppif	A0A498LM82		hint1	A0A498LW95		nrcam	A0A498MM02		psmg1	A0A498MHM4		arhgap5	A0A498MV13		hectd1	A0A498MVB8
anxa4	A0A498M537		cfh	A0A498NFR2		ik	A0A498NA94		dhrs12	A0A498N7U4		pgm3	A0A498N0K6		lnpb	A0A498NNC2		hspa13	A0A498LQ86		sgpl1	A0A498MUV0		snx8	A0A498M9Z7		rpl22l1	A0A498MCU8		slc1a3	A0A498LXA3		gstm3	A0A498LT46		psmb10	A0A498P5Y7		uckl1	A0A498NGD2
vamp7	A0A498M558		nprl3	A0A498NFT9		clip2	A0A498NM65		osgep	A0A498N1Z5		sh3gl1	A0A498NS04		pip4k2c	A0A498LNL7		cetp	A0A498MH61		lactb2	A0A498NT66		CUL7	A0A498MUU2		gpx7	A0A498LMD6		ncam1	A0A498NDY6		pgam5	A0A498NGG7		pla2g15	A0A498MQP5		shmt2	A0A498N951
atxn2l	A0A498M572		CLEC11A	A0A498NFY0		clip1	A0A498LGH2		sgpl1	A0A498MUV0		msi1	A0A498LH33		blmh	A0A498LH75		palm	A0A498NJP7		pgp	A0A498L837		sh3gl1	A0A498NS04		dnaja2	A0A498ME23		prrt2	A0A498LBU4		auh	A0A498LUF6		pin1	A0A498NLG8		cnot2	A0A498MPS8
rabep2	A0A498M5C6		tagap	A0A498NFZ5		ttbk2	A0A498M0Z0		fahd2a	A0A498NL77		lrpap1	A0A498MJN9		ccbl2	A0A498M4C1		papln	A0A498N304		magt1	A0A498N4G3		pdlim1	A0A498NZA9		ruvbl1	A0A498L6Q9		tnc	A0A498NLK0		ndufv2	A0A498N051		sec31a	A0A498M2A4		pvalb	A0A498LE30
CYTH2	A0A498M5E2		pebp1	A0A498NG47		arfgef2	A0A498L8D0		pgp	A0A498L837		mlycd	A0A498N2K8		sirt2	A0A498NP11		smchd1	A0A498MWG1		fkbp3	A0A498NTU1		adi1	A0A498N2V1		emid1	A0A498NJN8		bag6	A0A498MCG5		atp5o	A0A498NAQ8		ERP27	A0A498NL60		tmem214	A0A498LN85
syngr3	A0A498M5H3		golga3	A0A498NG76		gipc2	A0A498NT68		fkbp3	A0A498NTU1		carhsp1	A0A498N7T4		fen1	A0A498N5C0		pvrl2	A0A498LBT3		abhd10	A0A498MFZ3		dnajc6	A0A498NV29		cfi	A0A498LLL2		cntn1	A0A498MKH5		blvrb	A0A498MNG1		amt	A0A498MMV2		tollip	A0A498MVA6
soga3	A0A498LX81		enpp1	A0A498NG94		abhd16a	A0A498LBG1		lactb2	A0A498NT66		coq6	A0A498LSD3		eif3h	A0A498N383		emilin3	A0A498MRC1		idi1	A0A498LYI2		ELMO3	A0A498MR31		bgn	A0A498LBF9		TPP2	A0A498M7L0		hmgb2	A0A498LD75		vamp7	A0A498M558		pcsk1	A0A498LJS5
sars2	A0A498M5J5		add2	A0A498NGA5		casp7	A0A498LWI8		WWC1	A0A498LU65		HTRA2	A0A498MYC4		dnajb1	A0A498MBS7		entpd5	A0A498LS96		tango2	A0A498NJN4		clic1	A0A498MCJ8		ITIH4	A0A498MTS8		wdr11	A0A498MKV0		cryba2	A0A498NN55		brcc3	A0A498N6K7		mvb12b	A0A498NIA6
UBE2O	A0A498M5K6		coro1c	A0A498NGB7		pgam5	A0A498NGG7		wdr61	A0A498LAT7		stxbp5l	A0A498NEW7		galm	A0A498N834		aspn	A0A498LAH9		arl9	A0A498N6B9		clic2	A0A498LIJ7		c9	A0A498LPL8		slc23a3	A0A498N5F3		atp5f1	A0A498NAE3		sart3	A0A498NGA8		hsd17b12	A0A498MW42
DHX29	A0A498M5L2		g6pd	A0A498NGC9		TBC1D10B	A0A498NPG7		acot9	A0A498NT14		rcc1	A0A498L913		cnn1	A0A498LNC0		pkp1	A0A498L5R1		BPHL	A0A498NTJ2		psmb7	A0A498LKB6		fgg	A0A498LEH5		cog2	A0A498N102		abhd14b	A0A498L5N4		abcb11	A0A498MNE8		wdr3	A0A498N1L7
fstl5	A0A498M5P0		pgam5	A0A498NGG7		rab23	A0A498MZF8		abhd10	A0A498MFZ3		rp2	A0A498LIU3		dll3	A0A498LHZ4		abi3bp	A0A498NB29		hddc3	A0A498MHR4		itga1	A0A498MJY7		prelp	A0A498MSP0		capn11	A0A498LZE6		tsn	A0A498NEX9		nsdhl	A0A498N4F4		FTHL17	A0A498M9Z8
syngr1	A0A498M5P2		PPP1R12B	A0A498NGL8		kif13b	A0A498LM25		idi1	A0A498LYI2		pcyt1a	A0A498N083		thoc3	A0A498NUD0		spint1	A0A498NT18		EMG1	A0A498NMY4		slc25a24	A0A498MBM2		acvr2b	A0A498L7R7		scarb2	A0A498M7K2		rbp4	A0A498LVA3		echdc2	A0A498MNP2		FTL	A0A498NDR4
pnkp	A0A498M5P8		atp5a1	A0A498NGM2		usp24	A0A498LFW1		adi1	A0A498N2V1		mtm1	A0A498MT66		rad51	A0A498NL15		adpgk	A0A498NRY1		acp1	A0A498LQP8		pin1	A0A498NLG8		DHRS2	A0A498MT19		CAPN1	A0A498MPI7		atp5h	A0A498LBS5		arl6ip5	A0A498N5E0		wdr45	A0A498MS66
gng12	A0A498M5P9		rpl28	A0A498NGN3		nipbl	A0A498MPN9		pbdc1	A0A498MSR1		capns1	A0A498LHL4		sgpl1	A0A498MUV0		scarf1	A0A498LH50		polr2h	A0A498MUI6		sec31a	A0A498M2A4		tprkb	A0A498MGY9		pvrl1	A0A498M3K4		mrpl24	A0A498M3K3		slc44a2	A0A498NP49		zbtb16	A0A498N8W5
mgat4d	A0A498LVP1		map2k2	A0A498NGW6		mybpc3	A0A498M8F9		dpy30	A0A498LQX0		tmed9	A0A498NTD8		dnajc9	A0A498NT54		zbtb8os	A0A498LVR3		tsnaxip1	A0A498MFR0		sod2	A0A498LKV8		blvrb	A0A498MNG1		stau2	A0A498N771		dhrs13	A0A498LHI3		slc1a3	A0A498LXA3		zar1l	A0A498L7Q6
slc25a11	A0A498M5Q7		C19orf70	A0A498NH70		mical3	A0A498MY34		ssbp1	A0A498MN52		CARKD	A0A498LY36		rnaseh2b	A0A498N804		hmgcl	A0A498NCN4		gng12	A0A498M5P9		brcc3	A0A498N6K7		sorbs1	A0A498N6L4		VWA5A	A0A498LRS0		lgalsl	A0A498N9Q8		nipbl	A0A498MPN9		zar1	A0A498M6M7
piwil1	A0A498M5S1		rpn1	A0A498NHG3		tsta3	A0A498NTX3		tfg	A0A498NEM1		zyx	A0A498NNN0		lactb2	A0A498NT66		tpd52	A0A498MLK3		pcyt1a	A0A498N083		sart3	A0A498NGA8		pkp3	A0A498L903		ttc25	A0A498LWD3		tpt1	A0A498L311		cntn1	A0A498MKH5		pik3ca	A0A498NR51
EXOG	A0A498M5U6		PTS	A0A498NHH1		syt7	A0A498M0C1		mpp1	A0A498NE61		itih3	A0A498MUL6		atrnl1	A0A498LNI8		myoz3	A0A498N6C9		pcyt1b	A0A498MYA5		slc25a20	A0A498MA61		wapal	A0A498NCJ1		ak5	A0A498NUW9		ndufb10	A0A498MEZ8		cdh2	A0A498M627		ppie	A0A498N6L6
scfd2	A0A498M5W8		pdia5	A0A498NHN2		ugdh	A0A498N1B2		hat1	A0A498LJB0		wnk2	A0A498N2P5		alkbh3	A0A498MD60		bdh1	A0A498LTZ8		ciao1	A0A498LL84		bpgm	A0A498M3Y5		coasy	A0A498L3R0		rabggta	A0A498LQJ1		FTHL17	A0A498M9Z8		HEPHL1	A0A498LGH5		snx8	A0A498M9Z7
ppih	A0A498M607		snx4	A0A498NHT1		zfyve28	A0A498LUL1		rfc2	A0A498MYK7		cwf19l1	A0A498MEL6		rad17	A0A498NJL7		alg11	A0A498L602		anxa3	A0A498MM94		lgals3bp	A0A498M3M0		TRIP10	A0A498L7Z4		TBC1D24	A0A498L1B2		cnbp	A0A498NJ76		cog2	A0A498N102		stat4	A0A498NHR6
pdhx	A0A498M637		hibch	A0A498NHU6		iqsec3	A0A498LI57		SLC39A3	A0A498MYF6		adar	A0A498LYN1		fkbp3	A0A498NTU1		npl	A0A498NR45		ddrgk1	A0A498MQ41		echdc2	A0A498MNP2		angptl7	A0A498LVX8		eml2	A0A498LHW8		spryd4	A0A498NR16		capn11	A0A498LZE6		scfd2	A0A498M5W8
chmp1a	A0A498M640		myl1	A0A498NHU8		ntrk2	A0A498M659		hmgcl	A0A498NCN4		tinagl1	A0A498MW04		abhd10	A0A498MFZ3		snrnp40	A0A498MZK9		nup35	A0A498NE60		arl6ip5	A0A498N5E0		cpox	A0A498NRK2		maob	A0A498N7T6		copz1	A0A498LTD9		scarb2	A0A498M7K2		sgtb	A0A498MXP5
rtbdn	A0A498M645		CLTCL1	A0A498NHX3		c2cd2l	A0A498LPM8		dnajc9	A0A498NT54		mfn2	A0A498LZ42		arl9	A0A498N6B9		BPHL	A0A498NTJ2		chmp2a	A0A498LNM5		aifm1	A0A498NF81		apobec2	A0A498MYI0		dctn4	A0A498LYU8		rtn4	A0A498N4P6		CAPN1	A0A498MPI7		pdlim1	A0A498NZA9
nol6	A0A498MPA5		acaa2	A0A498NHY4		espnl	A0A498LFU9		clpp	A0A498N353		bbs1	A0A498LJT7		gins3	A0A498MRG4		fhl5	A0A498LMN9		dhrs13	A0A498LHI3		lars	A0A498N4V8		bmp6	A0A498NBG7		khdrbs1	A0A498LVV4		b4gat1	A0A498MPM1		VWA5A	A0A498LRS0		LRG1	A0A498M2U1
dcp1a	A0A498M653		set	A0A498NHZ1		ctnnd2	A0A498LE92		eif2b1	A0A498MSF0		dctn1	A0A498LGX9		fam213a	A0A498MWJ6		APOL4	A0A498LJA9		dscr3	A0A498MHR7		HEPHL1	A0A498LGH5		gabrd	A0A498M145		gad2	A0A498LWD9		cryab	A0A498M948		FAM114A2	A0A498M1F3		smtn	A0A498MJ23
C10orf76	A0A498M657		glyr1	A0A498NI11		rtn4ip1	A0A498N9R5		rpl7l1	A0A498M0I6		itgb4	A0A498N603		lsm12	A0A498MWW0		rad21	A0A498MV43		rpl7l1	A0A498M0I6		cog2	A0A498N102		auh	A0A498LUF6		nae1	A0A498LY63		tmco1	A0A498NRB8		ttc25	A0A498LWD3		pan3	A0A498NRH5
ntrk2	A0A498M659		serpind1	A0A498NI15		apoa1bp	A0A498M809		mettl1	A0A498NJD8		abcb8	A0A498N2F1		slc7a6os	A0A498MYF3		chd4	A0A498NJC5		hdhd1	A0A498L319		CAPN1	A0A498MPI7		csrp3	A0A498LSX4		ndrg2	A0A498LFM0		dgkz	A0A498N004		mccc1	A0A498MVF3		hspa12b	A0A498NUL7
espn	A0A498M671		vdac3	A0A498NI22		C11orf54	A0A498N1E7		bag1	A0A498MKQ1		smyd1	A0A498M2F7		tfg	A0A498NEM1		il2rb	A0A498NKR1		fam213b	A0A498MNJ8		capn11	A0A498LZE6		gmppb	A0A498M3E5		coch	A0A498MVT8		ppif	A0A498LM82		cttn	A0A498LTW8		nup133	A0A498LQR3
crhbp	A0A498M688		ppl	A0A498NI43		CDH16	A0A498M4C2		uchl1	A0A498MUF4		ndufa10	A0A498NBA5		nudcd3	A0A498N0M1		IL16	A0A498N0E1		fam136a	A0A498MJT0		scarb2	A0A498M7K2		NAALADL1	A0A498NJK4		negr1	A0A498LIT5		ppih	A0A498M607		hspa12b	A0A498NUL7		itga1	A0A498MJY7
myef2	A0A498M698		stam2	A0A498NI83		SEPT12	A0A498N0P4		fam213b	A0A498MNJ8		prrc1	A0A498M377		hgh1	A0A498M7J5		sdpr	A0A498N552		nup155	A0A498MMI4		stau2	A0A498N771		dpep1	A0A498M9G6		phgdh	A0A498MR33		rhebl1	A0A498MTE3		hspa12a	A0A498P302		slc25a24	A0A498MBM2
tarsl2	A0A498M6B2		ptk2	A0A498NIH1		plxna3	A0A498LT48		pfdn4	A0A498M237		dll3	A0A498LHZ4		amt	A0A498MMV2		f9	A0A498LH72		vps33a	A0A498MV07		VWA5A	A0A498LRS0		acy1	A0A498N1Q7		marcksl1	A0A498LYF0		lamtor1	A0A498N128		TBC1D24	A0A498L1B2		rpia	A0A498MZ96
eif3b	A0A498L933		sdr16c5	A0A498NIH3		plxna4	A0A498M9K4		acp1	A0A498LQP8		adpgk	A0A498NRY1		bckdk	A0A498MP23		pltp	A0A498M4T0		ubqln4	A0A498NQC9		ttc25	A0A498LWD3		C6orf58	A0A498LD72		RAP1GDS1	A0A498NIT8		prdx5	A0A498NCD5		eml2	A0A498LHW8		gyg1	A0A498P2U5
MRC2	A0A498M6I3		cct3	A0A498NIH7		PLXNA2	A0A498ML38		ccdc58	A0A498NRI8		adprhl2	A0A498MLM8		poglut1	A0A498NPT3		COL21A1	A0A498N526		cwc27	A0A498MJ25		hspa12b	A0A498NUL7		mep1b	A0A498NP29		sh3gl3	A0A498LZG2		glipr2	A0A498NDJ7		maob	A0A498N7T6		pin1	A0A498NLG8
mapk8ip3	A0A498M6J7		fhl3	A0A498NIJ0		asap2	A0A498MDM1		dnajc12	A0A498LNK7		bckdk	A0A498MP23		ciao1	A0A498LL84		col22a1	A0A498NSX4		tes	A0A498MJX4		eml2	A0A498LHW8		ALPK1	A0A498NF89		sh3gl2	A0A498NAP7		C11orf65	A0A498N5G5		nae1	A0A498LY63		ERP27	A0A498NL60
wdr48	A0A498M6L0		gps1	A0A498NIJ4		ccdc93	A0A498NHS7		fam136a	A0A498MJT0		LGALS3	A0A498LH57		chordc1	A0A498MYT1		apobec2	A0A498MYI0		mmd2	A0A498MI25		maob	A0A498N7T6		ctsa	A0A498L5Q4		idh3g	A0A498MYZ3		dpy30	A0A498LQX0		bsg	A0A498NT52		brcc3	A0A498N6K7
RHEB	A0A498M6L4		rps9	A0A498NIR7		gad1	A0A498LP77		lamtor3	A0A498MDH4		tpt1	A0A498L311		SLC39A3	A0A498MYF6		serpina10	A0A498MSI0		enosf1	A0A498MK24		nae1	A0A498LY63		endou	A0A498L5V8		atp1b2	A0A498MVI6		pfn2	A0A498LY02		khdrbs1	A0A498LVV4		sart3	A0A498NGA8
rhebl1	A0A498MTE3		camk2d	A0A498NIW6		npepl1	A0A498MZQ6		ECE2	A0A498LV26		atp5f1	A0A498NAE3		polr1c	A0A498MYZ9		col28a1	A0A498NQY3		itpr1	A0A498NQL6		ndrg2	A0A498LFM0		rpia	A0A498MZ96		gipc1	A0A498MKT8		fkbp1a	A0A498LWN3		coch	A0A498MVT8		bpgm	A0A498M3Y5
dnajc7	A0A498M6L9		gstk1	A0A498NIZ5		th	A0A498MXC2		nup93	A0A498MB05		serpinf1	A0A498LG29		hsd3b1	A0A498N8T3		fuca2	A0A498NQ43		nup210	A0A498MU58		khdrbs1	A0A498LVV4		grhpr	A0A498N971		necap1	A0A498NEK3		txndc17	A0A498LEU3		phgdh	A0A498MR33		bag6	A0A498MCG5
mpp3	A0A498M6M5		ddx49	A0A498NJ09		trappc12	A0A498N045		txndc9	A0A498NWS8		nfasc	A0A498ML33		dnaja3	A0A498MWI2		cmbl	A0A498LJP4		ppl	A0A498NI43		coch	A0A498MVT8		wdr18	A0A498NJJ6		psat1	A0A498MVT9		acot13	A0A498MLJ8		plch2	A0A498LWN1		top2b	A0A498LY18
zar1l	A0A498L7Q6		rpl13	A0A498NJ12		srgap3	A0A498L6G6		ktn1	A0A498LSE6		ostf1	A0A498MRW3		nup35	A0A498NE60		slc2a8	A0A498MPB2		UACA	A0A498MMN3		phgdh	A0A498MR33		GLOD5	A0A498N8L5		eif3m	A0A498NED7		SH3BGRL	A0A498LJ34		actr10	A0A498NS30		cog2	A0A498N102
zar1	A0A498M6M7		dazap1	A0A498NJ14		SEC14L1	A0A498M411		ppl	A0A498NI43		cadm1	A0A498N1X4		hmgcl	A0A498NCN4		mmrn2	A0A498NDX8		tm9sf1	A0A498N1R9		pdk3	A0A498MVA7		ap1s2	A0A498NJR7		tat	A0A498MY15		mif	A0A498LWI4		twf1	A0A498NTA0		c3	A0A498MDY3
cd247	A0A498M6R2		me1	A0A498NJ16		mpped2	A0A498LRI7		FTSJ3	A0A498NZF6		ech1	A0A498NP92		hnrnpa3	A0A498LJ97		psmb10	A0A498P5Y7		itgb4	A0A498N603		sept5	A0A498LUE9		eif4e	A0A498LFK8		pdxk	A0A498LCE5		C19orf70	A0A498NH70		idh3g	A0A498MYZ3		capn11	A0A498LZE6
slain2	A0A498M6R4		SYNPO2	A0A498NJ24		abhd12	A0A498P244		pitrm1	A0A498L3Z8		gnb5	A0A498M0B2		trmt61a	A0A498MSW6		bpgm	A0A498M3Y5		ktn1	A0A498LSE6		pdk1	A0A498LGU8		hat1	A0A498LNL0		dyrk4	A0A498MTT4		acbd7	A0A498NB54		mri1	A0A498N520		CAPN1	A0A498MPI7
creg1	A0A498M6R6		ap1g1	A0A498NJ31		rpl34	A0A498LPR4		carm1	A0A498N662		rgs9	A0A498L8W2		nif3l1	A0A498N151		tdrd1	A0A498LSJ7		slc9a1	A0A498MAK8		acot9	A0A498NT14		arpc5	A0A498LDJ8		sfxn1	A0A498LYC7		col6a6	A0A498LQS3		bckdk	A0A498MP23		pvrl1	A0A498M3K4
grk1	A0A498M6W2		CPNE7	A0A498NJ35		exosc4	A0A498N898		EPB41L2	A0A498LCY6		ndufs8	A0A498MMX0		rpf2	A0A498LD23		yod1	A0A498MRP2		gba2	A0A498MJL2		ndufa10	A0A498NBA5		agt	A0A498N0U2		vdac3	A0A498NI22		mtdh	A0A498MZF4		psat1	A0A498MVT9		scarb2	A0A498M7K2
eftud2	A0A498M6Y5		iars	A0A498NJ41		edf1	A0A498N173		myo6	A0A498MBZ1		acp1	A0A498LQP8		hibadha	A0A498MZS1		irf6	A0A498MPQ5		ERAP1	A0A498NJS0		idh3g	A0A498MYZ3		mlec	A0A498MDW3		hnrnpa0	A0A498N1Y3		col6a1	A0A498NRY6		adprh	A0A498MGA3		VWA5A	A0A498LRS0
fbn1	A0A498M6Z5		cdk4	A0A498NJ42		cacnb4.1	A0A498NNF1		sec63	A0A498M794		aimp1	A0A498LLM0		exosc7	A0A498MEI7		ptplad1	A0A498MFV3		osbp	A0A498LL08		gipc1	A0A498MKT8		rtn4ip1	A0A498N9R5		ca8	A0A498LKJ0		tf	A0A498N853		tat	A0A498MY15		ttc25	A0A498LWD3
FBN3	A0A498MW06		btf3l4	A0A498NJ63		cacnb1	A0A498LX45		pold1	A0A498LX53		PDPR	A0A498LTV8		gemin2	A0A498N3J3		TIMP4	A0A498NJC7		ZNF638	A0A498MJV7		cryl1	A0A498MAL2		akr1a1	A0A498NTT9		nudt5	A0A498N717		dlg5	A0A498LL74		dyrk4	A0A498MTT4		eml2	A0A498LHW8
srsf10	A0A498M722		cnbp	A0A498NJ76		ddah2	A0A498MD47		gde1	A0A498NPB5		tpp1	A0A498M886		eif2b1	A0A498MSF0		MUSTN1	A0A498MPT1		eefsec	A0A498LDF0		armc1	A0A498N9N0		plg	A0A498MP37		cpa1	A0A498NWE3		hspg2	A0A498LVR7		vdac3	A0A498NI22		khdrbs1	A0A498LVV4
sec63	A0A498M794		dpp4	A0A498NJ89		DDAH1	A0A498M2T9		pfas	A0A498MXI8		gapvd1	A0A498MG61		rpl7l1	A0A498M0I6		snx15	A0A498MK25		wdfy1	A0A498MRK7		tat	A0A498MY15		myo1f	A0A498NRY4		anp32e	A0A498N3E4		dcn	A0A498M9M2		pdxk	A0A498LCE5		crat	A0A498MJ07
RPL27A	A0A498M799		psmd7	A0A498NJ90		clvs2	A0A498LSN1		fkbp9	A0A498N0E3		erap2	A0A498MIP9		RMDN1	A0A498MCU4		hspb2	A0A498M953		myo1b	A0A498NA85		dyrk4	A0A498MTT4		aadacl4	A0A498N5A8		anxa10	A0A498MXP6		hspa4	A0A498NTF6		cpped1	A0A498L8L8		nae1	A0A498LY63
klhdc4	A0A498M7B3		C12orf10	A0A498NJE4		me1	A0A498NJ16		usp10	A0A498NJ04		optc	A0A498MSQ5		rftn1	A0A498NSF2		cbfb	A0A498MAS0		rab3gap2	A0A498N6K8		sec13	A0A498MAC6		pcnx	A0A498LHW1		blvra	A0A498N0E6		postn	A0A498LEZ7		hnrnpa0	A0A498N148		coch	A0A498MVT8
ociad2	A0A498M7B6		wdr18	A0A498NJJ6		pcyt2	A0A498N8I4		ubap2	A0A498M0G5		efnb1	A0A498N3G6		mnd1	A0A498M4T8		fgfbp2	A0A498N1A2		fkbp9	A0A498N0E3		sfxn1	A0A498LYC7		prss16	A0A498MU91		C5orf51	A0A498MMK1		tgfbi	A0A498NUS4		nudt5	A0A498N717		marcksl1	A0A498LYF0
hmcn1	A0A498M7C5		eif3d	A0A498NJK1		chdh	A0A498M851		hspa14	A0A498LD43		poglut1	A0A498NPT3		bag1	A0A498MKQ1		SNTB2	A0A498NEB7		dennd4c	A0A498MAQ4		vdac3	A0A498NI22		ehhadh	A0A498NB48		agmat	A0A498LQL0		thop1	A0A498LQ71		cpa1	A0A498NWE3		plch2	A0A498LWN1
spata18	A0A498M7E9		rad17	A0A498NJL7		DCX	A0A498NMA4		tnc	A0A498NLK0		gpc1	A0A498N4S2		hdhd1	A0A498L319		CNTNAP1	A0A498MG44		eml2	A0A498LHW8		hnrnpa0	A0A498N1Y3		erap2	A0A498MIP9		bmp6	A0A498NBG7		srsf11	A0A498MNI0		CPA3	A0A498LWH2		pdk1	A0A498LGU8
adprhl1	A0A498M7H3		cbr1	A0A498NJN0		xrn2	A0A498NK02		asns	A0A498M0X4		nid1	A0A498LVN4		uchl1	A0A498MUF4		lamb4	A0A498N4F2		usp10	A0A498NJ04		ca8	A0A498LKJ0		hyou1	A0A498LY34		vapb	A0A498LN48		nap1l4	A0A498L642		anp32e	A0A498N3E4		cops3	A0A498N2D1
acox1	A0A498M7H7		emid1	A0A498NJN8		adam10	A0A498LCA1		ahnak	A0A498NUL3		fbn1	A0A498M6Z5		psmd10	A0A498NUH3					cluh	A0A498LHF1		pdxk	A0A498LCE5		ftcd	A0A498LNN9		yjefn3	A0A498MU63		lum	A0A498ML95		anxa10	A0A498MXP6		twf1	A0A498NTA0
psmd2	A0A498M7I3		anxa1	A0A498NJQ3		strn3	A0A498MVV8		sec31a	A0A498M2A4		cast	A0A498LJR2		tdrd6	A0A498LI49					flii	A0A498LDS4		cpped1	A0A498L8L8		fads2	A0A498LQZ2		psmg1	A0A498MHM4		sesn2	A0A498N280		cops7a	A0A498LG70		sh3gl3	A0A498LZG2
hgh1	A0A498M7J5		ATP5B	A0A498NJQ6		dbt	A0A498NZ94		ubtf	A0A498LZ18		serpind1	A0A498NI15		tmco1	A0A498NRB8					rnf20	A0A498LLK7		nudt5	A0A498N717		slc30a7	A0A498MUC9		gstm3	A0A498LT46		farsa	A0A498NUW6		C19orf52	A0A498N670		sh3gl2	A0A498NAP7
scarb2	A0A498M7K2		ap1s2	A0A498NJR7		nudc	A0A498NQC1		vbp1	A0A498MJQ0		thbs1	A0A498M5X4		dnajc12	A0A498LNK7					SCYL1	A0A498N8C7		anp32e	A0A498N3E4		agpat3	A0A498NKN5		acot9	A0A498NT14		txndc5	A0A498NBH4		bmp6	A0A498NBG7		idh3g	A0A498MYZ3
fam63a	A0A498M7K8		ERAP1	A0A498NJS0		acot9	A0A498NT14		pum1	A0A498P422		acan	A0A498MLI6		fam136a	A0A498MJT0					dynlt3	A0A498NPR6		cops7a	A0A498LG70		plaa	A0A498NVE1		pgam5	A0A498NGG7		pdia6	A0A498LDE8		calb2	A0A498MBC2		gipc1	A0A498MKT8
TPP2	A0A498M7L0		cab39l	A0A498NJV9		TOM1	A0A498NL76		MAP3K15	A0A498M9V9		dpp4	A0A498NJ89		tdrd9	A0A498M970					pkp3	A0A498L903		blvra	A0A498N0E6		xdh	A0A498MQ50		auh	A0A498LUF6		RGPD5	A0A498MYX9		gstm3	A0A498LT46		necap1	A0A498NEK3
skiv2l2	A0A498M7N4		naa20	A0A498NJY6		sod1	A0A498LF02		srp72	A0A498N220		fbln1	A0A498NRZ2		eif2b4	A0A498M459					gga1	A0A498N338		C5orf51	A0A498MMK1		h6pd	A0A498LNH7		ndufv2	A0A498N051		serpinh1	A0A498LQN4		acot9	A0A498NT14		psat1	A0A498MVT9
kcnj13	A0A498M7P3		atp6v1d	A0A498NK38		dao	A0A498NG99		aacs	A0A498NG73		itih2	A0A498L9R8		vps33a	A0A498MV07					sec23ip	A0A498P0P1		hsd17b4	A0A498NEL9		crot	A0A498NB49		atp5o	A0A498NAQ8		ogn	A0A498N7R3		pgam5	A0A498NGG7		cryl1	A0A498MAL2
sbf1	A0A498M7Q2		psmc4	A0A498NK57		acsl4	A0A498NUU4		kif2a	A0A498NYD1		MYO1D	A0A498LMR6		toe1	A0A498LGC2					CC2D1A	A0A498NAN4		nqo1	A0A172E1Q5		pdia5	A0A498NHN2		atp5f1	A0A498NAE3		rhag	A0A498NBS9		auh	A0A498LUF6		tat	A0A498MY15
plbd1	A0A498M7Q3		rab10	A0A498NK69		chuk	A0A498NDH5		gns	A0A498MSP6		aox1	A0A498MB87		tes	A0A498MJX4					aacs	A0A498NG73		bmp6	A0A498NBG7		dak	A0A498MJD4		blvrb	A0A498MNG1		hyou1	A0A498LY34		ndufv2	A0A498N051		dyrk4	A0A498MTT4
dapl1	A0A498M7T0		tmed10	A0A498NK70		ech1	A0A498NP92		rangap1	A0A498LRL2		btd	A0A498LYJ5		uap1l1	A0A498LPN6					nid1	A0A498LVN4		psmg1	A0A498MHM4		grm2	A0A498LDH3		gpx1	A0A498NS09		spcs3	A0A498LC14		atp5o	A0A498NAQ8		PDXP	A0A498LDH5
srprb	A0A498M7U4		ap1b1	A0A498NK81		dclk2	A0A498LNZ0		fnta	A0A498NBL9		lama4	A0A498M9X2		fam98a	A0A498N9Z4					nipbl	A0A498MPN9		gstm3	A0A498LT46		acsf2	A0A498LNB8		abhd14b	A0A498L5N4		crygn	A0A498M4R5		atp5f1	A0A498NAE3		hmgcl	A0A498NCN4
nrm	A0A498M7V8		hadhb	A0A498NK83		fmnl2	A0A498NNG3		ptpn1	A0A498MHR0		chad	A0A498LNL3		ptbp2	A0A498N0X0					CAPN1	A0A498MPI7		ndufv2	A0A498N051		lman1	A0A498LJT3		diras1	A0A498LMH2		banf1	A0A498MYH6		blvrb	A0A498MNG1		mtx1	A0A498MNT9
crat	A0A498MJ07		ptpra	A0A498NKD0		snw1	A0A498NLB3		dnajc7	A0A498M6L9		rcn3	A0A498NP50		mmd2	A0A498MI25					SCYL2	A0A498L9W6		pebp1	A0A498NG47		cyp1a	A0A498MGE6		rbp4	A0A498LVA3		hint1	A0A498LW95		hmgb2	A0A498LD75		hnrnpa0	A0A498N148
strada	A0A498NMS2		kpna3	A0A498NKE3		CXorf56	A0A498NEP4		LYAR	A0A498MQW9		olfml3	A0A498ML14		txndc9	A0A498NWS8					vac14	A0A498MWP3		atp5o	A0A498NAQ8		hgd	A0A498N1P6		atp5h	A0A498LBS5		rpl22l1	A0A498MCU8		ak1	A0A498LXQ7		nudt5	A0A498N717
utp18	A0A498M7W9		atp6v1a	A0A498NKE4		pdzd11	A0A498LHS2		pgm3	A0A498N0K6		CKAP4	A0A498NT67		ktn1	A0A498LSE6					sec31a	A0A498M2A4		atp5f1	A0A498NAE3		rcn3	A0A498NP50		mrpl24	A0A498M3K3		gpx7	A0A498LMD6		crybb2	A0A498P1P5		cpa1	A0A498NWE3
msto1	A0A498M7Y7		vps29	A0A498NKF0		sart3	A0A498NGA8		LMTK3	A0A498NJ80		ppm1f	A0A498LFN2		FTSJ3	A0A498NZF6					ston2	A0A498LKF2		blvrb	A0A498MNG1		agxt	A0A498L8H1		lgalsl	A0A498N9Q8		ssb	A0A498NSJ3		gpx1	A0A498NS09		CPA3	A0A498LWH2
apoa1bp	A0A498M809		gsn	A0A498NKF8		stau2	A0A498N771		dync1li1	A0A498MZQ8		plbd1	A0A498M7Q3		FOCAD	A0A498MXQ9					strn3	A0A498MVV8		hmgb2	A0A498LD75		lpgat1	A0A498N1V0		tpt1	A0A498L311		ruvbl1	A0A498L6Q9		abhd14b	A0A498L5N4		anp32e	A0A498N3E4
htatip2	A0A498M812		gpn3	A0A498NKJ5		patl1	A0A498LQS9		cdc37	A0A498MDY1		ddah2	A0A498MD47		cgnl1	A0A498NLG4					ptprk	A0A498LD50		ak1	A0A498LXQ7		galm	A0A498N834		ndufb10	A0A498MEZ8		lta4h	A0A498N9T1		tsn	A0A498NEX9		KCTD12	A0A498LBV4
psma8	A0A498M831		c1qbp	A0A498NKL6		C11orf30	A0A498MCN4		lrpap1	A0A498MJN9		GCA	A0A498NPI3		baz1b	A0A498MTQ2					myo7a	A0A498NUD1		crybb2	A0A498P1P5		dhrs1	A0A498L4Y6		FTHL17	A0A498M9Z8		emid1	A0A498NJN8		rbp4	A0A498LVA3		anxa10	A0A498MXP6
chdh	A0A498M851		stom	A0A498NKN9		brox	A0A498NTV5		brox	A0A498NTV5		gnmt	A0A498LU93		map1s	A0A498MS83					ptk2	A0A498NIH1		gpx1	A0A498NS09		helb	A0A498MK68		cnbp	A0A498NJ76		mcm6	A0A498NNW8		atp5h	A0A498LBS5		cops7a	A0A498LG70
mif4gd	A0A498M870		eif2b2	A0A498NKP3		exoc4	A0A498MEI4		clint1	A0A498LHC0		apmap	A0A498NDS9		nup214	A0A498M2G5					galnt7	A0A498LGC3		abhd14b	A0A498L5N4		sccpdh	A0A498N3L1		cnrip1	A0A498LNC9		mcm2	A0A498NLN5		mrpl24	A0A498M3K3		blvra	A0A498N0E6
chrd	A0A498M882		hmox	A0A498NKS2		arhgap35	A0A498LZX9		RNF157	A0A498LWK4		srpx2	A0A498LPR7		TTC37	A0A498MX24					adpgk	A0A498NRY1		cryba2	A0A498NN55		hsd11b1l	A0A498NGY1		spryd4	A0A498NR16		gyg1	A0A498P2U5		tpt1	A0A498L311		C5orf51	A0A498MMK1
tpp1	A0A498M886		KYNU	A0A498NKT3		rab3gap1	A0A498M8S1		vrk1	A0A498LMR7		sorbs3	A0A498MGG0		nup160	A0A498NYB9					eif2b1	A0A498MSF0		mrpl24	A0A498M3K3		srprb	A0A498M7U4		PEA15	A0A498NPD4		txndc12	A0A498NUQ3		ndufb10	A0A498MEZ8		C19orf52	A0A498N670
unc119b	A0A498M894		cspg5	A0A498NKU3		pik3c3	A0A498MY27		tmf1	A0A498MR76		rpl18	A0A498NPB6		gemin5	A0A498LZ34					fnta	A0A498NBL9		lgalsl	A0A498N9Q8		khk	A0A498MZI9		copz1	A0A498LTD9		mesdc2	A0A498MYN3		FTHL17	A0A498M9Z8		nit2	A0A498LLS5
nck1	A0A498M3P0		CUTA	A0A498NKY3		wwp2	A0A498NYE1		hmox2	A0A498MX39		hyi	A0A498MHW3		aqr	A0A498NAG9					ptpn1	A0A498MHR0		tpt1	A0A498L311		phyhd1	A0A498NQ68		rtn4	A0A498N4P6		ube2h	A0A498ML75		cnbp	A0A498NJ76		tsnax	A0A498LQL6
nck2	A0A498M8A4		ERP27	A0A498NL60		exoc8	A0A498NG84		hgs	A0A498L6D4		ggct	A0A498LE09		sec63	A0A498M794					eif2b2	A0A498NKP3		ndufb10	A0A498MEZ8		ak4	A0A498NVU3		b4gat1	A0A498MPM1		apoe	A0A498LT17		spryd4	A0A498NR16		vapb	A0A498LN48
mfap2	A0A498M8B4		fahd2a	A0A498NL77		gfm1	A0A498M0Y0		ppt1	A0A498MZL6		synm	A0A498MFT6		flnb	A0A498NUL0					ergic3	A0A498LQN5		FTHL17	A0A498M9Z8		SLC25A10	A0A498M8Q5		cryab	A0A498M948		cfi	A0A498LLL2		gpn3	A0A498NKJ5		clic1	A0A498MCJ8
atp5j2	A0A498M8D4		lgals2	A0A498NLB5		stxbp2	A0A498L8H8		hmbs	A0A498N9V5		LRG1	A0A498M2U1		faf1	A0A498NRK1					asns	A0A498M0X4		cnbp	A0A498NJ76		TPMT	A0A498NAT0		dgkz	A0A498N004		bgn	A0A498LBF9		copz1	A0A498LTD9		psmg1	A0A498MHM4
hsp90b1	A0A498M8E6		rexo2	A0A498NLD2		sh3gl1	A0A498NS04		uap1	A0A498NU86		abhd10	A0A498MFZ3		mtor	A0A498LWP3					ist1	A0A498ME94		spryd4	A0A498NR16		cmbl	A0A498LJP4		rpl32	A0A498MLZ6		c9	A0A498LPL8		rtn4	A0A498N4P6		gstm3	A0A498LT46
cstf3	A0A498NC45		pin1	A0A498NLG8		parva	A0A498M9A8		sh3gl1	A0A498NS04		lxn	A0A498M4K7		gde1	A0A498NPB5					rrs1	A0A498N4V0		copz1	A0A498LTD9		fahd1	A0A498MF21		ppih	A0A498M607		fgg	A0A498LEH5		b4gat1	A0A498MPM1		pgam5	A0A498NGG7
HSP90AA1	A0A498NTH7		hspb1	A0A498NLH3		ppm1h	A0A498NT63		calu	A0A498MEU8		mst1	A0A498L8J5		ankfy1	A0A498LYZ7					gpt2	A0A498MJ55		rtn4	A0A498N4P6		spcs2	A0A498LTL5		rps10	A0A498LD02		padi2	A0A498LR20		ppih	A0A498M607		ndufv2	A0A498N051
fbxo3	A0A498M8K1		tnc	A0A498NLK0		tfg	A0A498NEM1		qki	A0A498MKM2		COPS6	A0A498MS62		nudcd1	A0A498NC47					LMTK3	A0A498NJ80		b4gat1	A0A498MPM1		ARMC3	A0A498L6X2		prdx5	A0A498NCD5		prelp	A0A498MSP0		pdcd6	A0A498MR44		atp5o	A0A498NAQ8
PRKDC	A0A498M8N7		NAPSA	A0A498NLQ0		pdhx	A0A498M637		amt	A0A498MMV2		podn	A0A498LIT3		PRKDC	A0A498M8N7					amacr	A0A498N563		cryab	A0A498M948		CUTA	A0A498NKY3		pin1	A0A498NLG8		DHRS2	A0A498MT19		rhebl1	A0A498MTE3		atp5f1	A0A498NAE3
abcf2	A0A498M8N9		rps4x	A0A498NLU9		polr2a	A0A498LS48		gpt	A0A498NM13		serpine2	A0A498MRK0		eefsec	A0A498LDF0					cstf1	A0A498MJ92		tmco1	A0A498NRB8		myoz2	A0A498NJH4		sod1	A0A498LF02		hgd	A0A498N1P6		prdx5	A0A498NCD5		cryba2	A0A498NN55
scp2	A0A498M8P4		gpt	A0A498NM13		ddc	A0A498LCB0		gpt2	A0A498MJ55		smpdl3b	A0A498LTC9		mogs	A0A498MJT7					cdc37	A0A498MDY1		PEA15	A0A498NPD4		pcmt1	A0A498MN94		glipr2	A0A498NDJ7		dbi	A0A498LFM5		cotl1	A0A498N767		gpx1	A0A498NS09
phkb	A0A498M8P5		MPST	A0A498NM22		trnt1	A0A498LBE8		bckdk	A0A498MP23		aadac	A0A498M1J0		tram1	A0A498N3X2					brox	A0A498NTV5		dgkz	A0A498N004		NAGK	A0A498NUS0		cotl1	A0A498N767		ppp1r10	A0A498MTQ7		C11orf65	A0A498N5G5		abhd14b	A0A498L5N4
SLC25A10	A0A498M8Q5		scpep1	A0A498NM74		pcyt1a	A0A498N083		HTRA2	A0A498MYC4		aimp2	A0A498NC19		PELP1	A0A498MPE7					ttc38	A0A498MXZ7		ppih	A0A498M607		ctsc	A0A498N5Q8		C11orf65	A0A498N5G5		tg	A0A498ML13		dpy30	A0A498LQX0		mrpl24	A0A498M3K3
rab3gap1	A0A498M8R6		DCX	A0A498NMA4		gbas	A0A498LR17		sult6b1	A0A498LLM4		ambp	A0A498MNZ5		pfas	A0A498MXI8					actr10	A0A498NSI6		cops8	A0A498NEP6		nup210	A0A498MU58		pfn2	A0A498LY02		sorbs1	A0A498N6L4		pfn2	A0A498LY02		lgalsl	A0A498N9Q8
ndufa3	A0A498M8T1		il2rg	A0A498NMA5		hp1bp3	A0A498MUK5		pno1	A0A498LU40		cpvl	A0A498NPD7		brix1	A0A498MD24					zpr1	A0A498LUF5		prdx5	A0A498NCD5		arhgdia	A0A498LI33		fkbp1a	A0A498LWN3		plg	A0A498MP37		fkbp1a	A0A498LWN3		tpt1	A0A498L311
serpinf1	A0A498LG29		kcnh6	A0A498NMG8		cdc37	A0A498MDY1		srp19	A0A498N377		c5	A0A498MMD9		myo1b	A0A498NA85					tmx3	A0A498M080		glipr2	A0A498NDJ7		ssb	A0A498NSJ3		txndc17	A0A498LEU3		f8	A0A498NEE6		txndc17	A0A498LEU3		atp5h	A0A498LBS5
cpeb1	A0A498M8V5		elavl2	A0A498NML0		PPP2R5B	A0A498MY88		rcc1	A0A498L913		gpn3	A0A498NKJ5		DHX29	A0A498M5L2					smyd5	A0A498NT34		C11orf65	A0A498N5G5		fah	A0A498NA62		acot13	A0A498MLJ8		pkp3	A0A498L903		pvalb	A0A498LE30		tbccd1	A0A498NB66
mrpl20	A0A498M8Y2		psme2	A0A498NMM5		csrp2	A0A498NZS0		dab2	A0A498LQA2		AHSG	A0A498N4I5		TRAPPC8	A0A498M3C1					micu2	A0A498NEE5		pfn2	A0A498LY02		pip4k2a	A0A498L6U4		SH3BGRL	A0A498LJ34		cetp	A0A498MH61		nhp2l1	A0A498MA66		ndufb10	A0A498MEZ8
nckipsd	A0A498M8Z0		st13	A0A498NMR0		thop1	A0A498LQ71		dcps	A0A498MCN8		ND1	H9C4W4		scp2	A0A498M8P4					pofut1	A0A498M0R9		fkbp1a	A0A498LWN3		ddi2	A0A498L5Z7		mif	A0A498LWI4		coasy	A0A498L3R0		SH3BGRL	A0A498LJ34		cnbp	A0A498NJ76
setdb1	A0A498M922		dctn5	A0A498NMV5		phgdh	A0A498MR33		pcyt1a	A0A498N083		fuca2	A0A498NQ43		exoc4	A0A498MEI4					RNF157	A0A498LWK4		txndc17	A0A498LEU3		apeh	A0A498MLK0		C19orf70	A0A498NH70		agt	A0A498N0U2		plau	A0A498N806		spryd4	A0A498NR16
PPAP2A	A0A498M932		nsf	A0A498NMX0		rab33a	A0A498MU04		map1s	A0A498MS83		dcxr	A0A498NAW3		sel1l	A0A498N1D0					aarsd1	A0A498LUG3		acot13	A0A498MLJ8		psmd5	A0A498NGP6		col6a1	A0A498NRY6		angptl7	A0A498LVX8		habp2	A0A498LPN2		copz1	A0A498LTD9
mrm1	A0A498M937		eef2	A0A498NN34		dip2b	A0A498LEH1		nab2	A0A498LSV1		npl	A0A498NR45		OPLAH	A0A498NLG1					irf6	A0A498MPQ5		nhp2l1	A0A498MA66		ethe1	A0A498LA32		tf	A0A498N853		TRIP10	A0A498L7Z4		f10	A0A498MBE1		rtn4	A0A498N4P6
atp6v1g1	A0A498M939		hacl1	A0A498NN40		slc1a3	A0A498LXA3		nifk	A0A498NHP2		lgals2	A0A498NLB5		SCYL1	A0A498N8C7					alg2	A0A498NB78		SH3BGRL	A0A498LJ34		KIF25	A0A498MHB2		syngr3	A0A498M5H3		hpd	A0A498NED6		mif	A0A498LWI4		b4gat1	A0A498MPM1
slc4a1ap	A0A498M947		prx	A0A498NNA6		wdr48	A0A498M6L0		enoph1	A0A498LUE7		ndufa2	A0A498NC16		nup153	A0A498MWU9					hmbs	A0A498N9V5		atp6v1f	A0A498MDB7		itga1	A0A498MJY7		ND1	H9C4W4		MPST	A0A498NM22		C19orf70	A0A498NH70		cryab	A0A498M948
cryab	A0A498M948		hibadh	A0A498NNB9		itsn1	A0A498NJX5		lmo7	A0A498MEA4		rpl14	A0A498N3B3		ufl1	A0A498MAA7					AHNAK2	A0A498MWM5		mif	A0A498LWI4		iars2	A0A498N5U1		dlg5	A0A498LL74		gabrd	A0A498M145		acbd7	A0A498NB54		tmco1	A0A498NRB8
hspb2	A0A498M953		rgn	A0A498NNC6		ddx41	A0A498ND57		timm8b	A0A498LTE7		tom1l2	A0A498LC95		clint1	A0A498LHC0					DHX35	A0A498MG05		C19orf70	A0A498NH70		mfi2	A0A498NZE5		pclo	A0A498MFE7		clpp	A0A498N353		mtdh	A0A498MZF4		dgkz	A0A498N004
rtn1	A0A498M967		zyx	A0A498NNN0		aida	A0A498NSI3		ppp1r11	A0A498MG98		pgrmc1	A0A498LQK2		hspa14	A0A498LD43					decr2	A0A498MPU1		mtdh	A0A498MZF4		cstf3	A0A498NC45		hspg2	A0A498LVR7		chchd10	A0A498NKQ8		col6a6	A0A498LVS1		rpl32	A0A498MLZ6
tdrd9	A0A498M970		ndufs1	A0A498NNW4		jak1	A0A498NAB0		mrpl4	A0A498LRL5		ndufb10	A0A498MEZ8		ogt	A0A498MSU8					carhsp1	A0A498N7T4		col6a6	A0A498LVS1		acsl4	A0A498NUU4		prx	A0A498NNA6		cpo	A0A498NF92		col6a1	A0A498NRY6		ppih	A0A498M607
cebpz	A0A498M981		rab9a	A0A498NNX0		tjp3	A0A498MUR5		ostf1	A0A498MRW3		COX2	H9C4W7		rad50	A0A498MXF2					slc9a3r1	A0A498LA10		col6a1	A0A498NRY6		eif2a	A0A498NTQ4		myom2	A0A498N3K3		gns	A0A498MSP6		tf	A0A498N853		pdcd6	A0A498MR44
rtn3	A0A498LGC7		nme4	A0A498NNX8		tjp2	A0A498MYC9		ndufa12	A0A498L9Q3		lmo7	A0A498MEA4		xab2	A0A498N3W7					snx9	A0A498N326		tf	A0A498N853		dync1i2	A0A498LP67		postn	A0A498LEZ7		acy1	A0A498N1Q7		ND1	H9C4W4		rhebl1	A0A498MTE3
psmd3	A0A498M9B4		myh11	A0A498NNZ3		fhl3	A0A498NIJ0		mrpl46	A0A498NFK4		pfn1	A0A498LJP3		ND4	A0A0G3F7Z2					kyat1	A0A498LQ81		dlg5	A0A498LL74		nploc4	A0A498LR06		tgfbi	A0A498NUS4		C6orf58	A0A498LD72		dlg5	A0A498LL74		glipr2	A0A498NDJ7
dpep1	A0A498M9G6		des	A0A498NNZ4		fhl5	A0A498LMN9		mrpl12	A0A498L6M4		ppp1r10	A0A498MTQ7		asns	A0A498M0X4					pcyox1	A0A498MM46		hspg2	A0A498LVR7		faf2	A0A498ND52		klhl31	A0A498MZG5		ALPK1	A0A498NF89		prx	A0A498NNA6		C11orf65	A0A498N5G5
AKAP9	A0A498M9G7		eef1b2	A0A498NP09		lcp2	A0A498LG89		srprb	A0A498M7U4		cd9	A0A498MN46		gtpbp6	A0A498LR98					STARD10	A0A498MIP6		tnn	A0A498MVF0		hexdc	A0A498LRC0		srsf11	A0A498MNI0		ctsa	A0A498L5Q4		PHKA2	A0A498NR97		pfn2	A0A498LY02
nrf1	A0A498M9K6		sirt2	A0A498NP11		dmgdh	A0A498MPE4		decr2	A0A498MPU1		DDO	A0A498NQ53		PDPR	A0A498LTV8					dab2	A0A498LQA2		dcn	A0A498M9M2		galk2	A0A498N6I1		lta4h	A0A498N9T1		rpia	A0A498MZ96		hspg2	A0A498LVR7		fkbp1a	A0A498LWN3
dcn	A0A498M9M2		mep1b	A0A498NP29		sod2	A0A498LKV8		CARKD	A0A498LY36		dbi	A0A498LFM5		gga1	A0A498N338					tfg	A0A498NEM1		hspa4	A0A498NTF6		blmh	A0A498LH75		nap1l4	A0A498L642		sptlc2	A0A498NKS8		mrps9	A0A498NPH4		txndc17	A0A498LEU3
strap	A0A498M9M9		rcn3	A0A498NP50		gmppa	A0A498NPA3		mtx2	A0A498NNV7		fam114a1	A0A498NA38		dhtkd1	A0A498MTD0					dcps	A0A498MCN8		exoc1	A0A498N1G4		sirt2	A0A498NP11		lum	A0A498ML95		grhpr	A0A498N971		hspa4	A0A498NTF6		SH3BGRL	A0A498LJ34
chpt1	A0A498M9P3		ephx2	A0A498NP55		numb	A0A498N647		pycrl	A0A498NTF0		kng1	A0A498MUT8		dnajc7	A0A498M6L9					rp2	A0A498LIU3		postn	A0A498LEZ7		ccbl2	A0A498M4C1		pdia6	A0A498LDE8		slc4a1	A0A498LX14		exoc1	A0A498N1G4		plau	A0A498N806
rab11fip1	A0A498M9P4		ube2g2	A0A498NP91		dctn2	A0A498NC63		vrk3	A0A498MQK5		MPST	A0A498NM22		hltf	A0A498NFX0					CAMK1	A0A498LF47		tgfbi	A0A498NUS4		anxa3	A0A498MM94		tmod4	A0A498NIP2		pip4k2c	A0A498LNL7		postn	A0A498LEZ7		habp2	A0A498LPN2
camk4	A0A498M9Q6		ech1	A0A498NP92		mtss1l	A0A498MA18		mrpl23	A0A498N0S9		pawr	A0A498LS91		ptpn23	A0A498M163					atxn2l	A0A498M572		thop1	A0A498LQ71		lactb2	A0A498NT66		serpinh1	A0A498LQN4		lamp2	A0A498LL15		srsf11	A0A498MNI0		f10	A0A498MBE1
acaca	A0A498M9R9		gmppa	A0A498NPA3		vrk3	A0A498MQK5		gnpnat1	A0A498LM02		ankrd55	A0A498LW93		C16orf62	A0A498NRN3					map1s	A0A498MS83		srsf11	A0A498MNI0		enoph1	A0A498LUE7		capza1	A0A498MN53		epcam	A0A498MSX6		lta4h	A0A498N9T1		mif	A0A498LWI4
acacb	A0A498NGB1		rpl18	A0A498NPB6		rdh14	A0A498N127		sh3bp1	A0A498LBG3		ubxn1	A0A498N3S1		pdxdc1	A0A498NI10					rwdd1	A0A498NIQ8		nap1l4	A0A498L642		sfxn2	A0A498LP20		fbp2	A0A498NRE8		pdzk1	A0A498LY27		nap1l4	A0A498L642		C19orf70	A0A498NH70
cacna2d1	A0A498NXN0		PEA15	A0A498NPD4		rbks	A0A498MFU8		mrps5	A0A498N6R0		lancl2	A0A498LF21		arhgap17	A0A498L885					sult6b1	A0A498LLM4		lum	A0A498ML95		lmo7	A0A498MEA4		ogn	A0A498N7R3		rnps1	A0A498NUH6		lum	A0A498ML95		col6a1	A0A498NRY6
lrrc17	A0A498M9T9		rras	A0A498NPH6		purg	A0A498LUM9		scpep1	A0A498NM74		hspb1	A0A498NLH3		gnpat	A0A498NFY8					mrpl43	A0A498N0F3		txndc5	A0A498NBH4		echdc2	A0A498MNP2		pdlim7	A0A498N3Z6		arpc5	A0A498LDJ8		RGPD5	A0A498MYX9		tf	A0A498N853
copg2	A0A498M9V6		GCA	A0A498NPI3		nans	A0A498MGP0		srp9	A0A498LZI4		epcam	A0A498MSX6		tut1	A0A498NCS2					rai14	A0A498NC59		pdia6	A0A498LDE8		abhd10	A0A498MFZ3		emc2	A0A498LFR4		srsf9	A0A498MHG4		tmod4	A0A498NIP2		dlg5	A0A498LL74
dhrs7	A0A498M9V7		TMEM200B	A0A498NPL1		prkab1	A0A498NSQ4		COQ5	A0A498NGF1		eci2	A0A498M2P5		nup88	A0A498NMR7					ssu72	A0A498L4V5		adss	A0A498LEX5		fam213a	A0A498MWJ6		dhrs13	A0A498LHI3		dpp7	A0A498LRS8		murc	A0A498NTA9		rho	A0A498MKV7
tfrc	A0A498M1D0		thoc6	A0A498NPP4		myh7b	A0A498MFA4		tsnaxip1	A0A498MFR0		HPGD	A0A498L7V7		aspscr1	A0A498MRG9					brcc3	A0A498N6K7		tmod4	A0A498NIP2		ndufb10	A0A498MEZ8		rhag	A0A498NBS9		anxa3	A0A498MM94		fbp2	A0A498NRE8		PHKA2	A0A498NR97
MAP3K15	A0A498M9V9		dynlt3	A0A498NPR6		scgn	A0A498N7U2		vamp7	A0A498M558		FBLN7	A0A498LM03		tfrc	A0A498M1D0					lmo7	A0A498MEA4		murc	A0A498NTA9		cops8	A0A498NEP6		pck2	A0A498N0Y6		mlec	A0A498MDW3		myoz1	A0A498N7V3		hyou1	A0A498LY34
dennd5b	A0A498M9W0		poglut1	A0A498NPT3		slc8a1	A0A498NFB5		SV2A	A0A498L915		fkbp3	A0A498NTU1		sec23b	A0A498N4Q4					ATG101	A0A498L8E1		serpinh1	A0A498LQN4		edf1	A0A498N173		pabpn1	A0A498N001		rtn4ip1	A0A498N9R5		pdlim7	A0A498N3Z6		dcn	A0A498M9M2
lama4	A0A498M9X2		hapln1	A0A498NQ29		qki	A0A498MKM2		cwf19l1	A0A498MEL6		mgat4d	A0A498LVP1		scfd2	A0A498M5W8					bet1	A0A498NBH2		esd	A0A498N9Q6		mpp1	A0A498NE61		eif4h	A0A498M1G8		gpt	A0A498NM13		anxa1	A0A498NJQ3		exoc1	A0A498N1G4
FTHL17	A0A498M9Z8		hsd3b7	A0A498NQ52		tmem30a	A0A498M1P6		papss1	A0A498LNF8		auh	A0A498LUF6		ppl	A0A498NI43					WNK4	A0A498MRM3		fbp2	A0A498NRE8		pcyt1a	A0A498N083		enoph1	A0A498LUE7		asl	A0A498LPJ7		bag6	A0A498MCG5		pde6c	A0A498LV54
FTL	A0A498NDR4		DDO	A0A498NQ53		cbln1	A0A498MFW5		ELMO3	A0A498MR31		fbp2	A0A498NRE8		CC2D1A	A0A498NAN4					dcxr	A0A498NAW3		ogn	A0A498N7R3		pcyt1b	A0A498MYA5		cav3	A0A498LEL3		pcnx	A0A498LHW1		mrto4	A0A498LVI3		pde6a	A0A498NT55
ap5z1	A0A498M9Z9		ap2a1	A0A498NQ62		sun1	A0A498NTM2		C14orf169	A0A498NKK1		gstk1	A0A498NIZ5		ptch2	A0A498MVG0					ndufa12	A0A498L9Q3		znf346	A0A498LRE1		prkag1	A0A498LH41		spcs3	A0A498LC14		prss16	A0A498MU91		sdr16c5	A0A498NIH3		pde6b	A0A498NC64
mtss1l	A0A498MA18		rab3d	A0A498NQ75		kctd8	A0A498N8G3		epn2	A0A498LCD7		rps10	A0A498LD02		pola2	A0A498NS33					COQ7	A0A498LXQ3		alad	A0A498MB86		chordc1	A0A498MYT1		nhp2l1	A0A498NAK3		ehhadh	A0A498NB48		pcna	A0A498MYE6		postn	A0A498LEZ7
taf9	A0A498MA28		abce1	A0A498NQD7		tmem2	A0A498NJK3		gnl3	A0A498P826		trove2	A0A498N4K4		ttll12	A0A498P2L1					mrpl12	A0A498L6M4		myoz1	A0A498N7V3		emc2	A0A498LFR4		fkbp2	A0A498N4H0		lamtor3	A0A498MDH4		dhrs13	A0A498LHI3		capn3	A0A498LUN0
dhodh	A0A498MA59		wrb	A0A498NQE4		rabl3	A0A498NCW8		mtm1	A0A498MT66		pdlim2	A0A498MLE9		ELMO3	A0A498MR31					exosc5	A0A498L7U9		pdlim7	A0A498N3Z6		psmb10	A0A498P5Y7		hint1	A0A498LW95		erap2	A0A498MIP9		polr2c	A0A498MLT3		tgfbi	A0A498NUS4
slc25a20	A0A498MA61		RDX	A0A498NQF9		plxna1	A0A498NKS1		acsf2	A0A498LNB8		cryz	A0A498P4F6		ASPH	A0A498NIB6					SV2A	A0A498L915		bag6	A0A498MCG5		hdhd1	A0A498L319		rpl22l1	A0A498MCU8		heatr1	A0A498N9B6		pabpn1	A0A498N001		rpe65	A0A498N2N7
papola	A0A498MA91		iqgap2	A0A498NQN9		nlgn2a	A0A498NDY4		insr	A0A498NNJ9		zc2hc1a	A0A498M1B4		zw10	A0A498N5G7					vrk3	A0A498MQK5		dhrs13	A0A498LHI3		uchl1	A0A498MUF4		txndc5	A0A498NBH4		agpat3	A0A498NKN5		spcs3	A0A498LC14		srsf11	A0A498MNI0
mrpl15	A0A498MA95		eppk1	A0A498NQT4		nlgn2	A0A498MMK5		eif5b	A0A498N8A7		ppt1	A0A498MZL6		ddx23	A0A498NGG1					zyx	A0A498NNN0		rhag	A0A498NBS9		psmb9	A0A498M262		dctn2	A0A498NC63		plaa	A0A498NVE1		banf1	A0A498MYH6		nap1l4	A0A498L642
ufl1	A0A498MAA7		psma5	A0A498NQY9		gabrb2	A0A498NU18		ACP2	A0A498MBX8		ctsb	A0A498NV01		mms19	A0A498N5Y0					spint1	A0A498NT18		spcs3	A0A498LC14		dctn5	A0A498NMV5		ssb	A0A498NSJ3		xdh	A0A498MQ50		hint1	A0A498LW95		lum	A0A498ML95
recql	A0A498MAC3		tars	A0A498NQZ7		epb41	A0A498NQS7		lrrc47	A0A498NRA1		psmb4	A0A498NBJ4		dync1li2	A0A498LWA9					srp9	A0A498LZI4		banf1	A0A498MYH6		rnf181	A0A498MV94		pdia5	A0A498NHN2		sec63	A0A498M794		RHEB	A0A498M6L4		txndc5	A0A498NBH4
sec13	A0A498MAC6		spryd4	A0A498NR16		pclo	A0A498MFE7		slc23a3	A0A498N5F3		TPMT	A0A498NAT0		gapvd1	A0A498MEX2					efnb1	A0A498N3G6		hint1	A0A498LW95		WNK4	A0A498MRM3		emid1	A0A498NJN8		h6pd	A0A498LNH7		ddrgk1	A0A498MQ41		pdia6	A0A498LDE8
ttbk2	A0A498M0Z0		cpt2	A0A498NR22		SLC6A11	A0A498NJT0		adprhl2	A0A498MLM8		ndufs5	A0A498LDC1		eif2b5	A0A498M148					sh3bgrl2	A0A498LCP1		gpx7	A0A498LMD6		MTFP1	A0A498LWV6		gyg1	A0A498P2U5		ufl1	A0A498MAA7		ssb	A0A498NSJ3		murc	A0A498NTA9
acbd3	A0A498MAD5		myl2	A0A498NR32		SLC6A13	A0A498NTI9		tjp3	A0A498MUR5		atp5d	A0A498MGL5		C14orf169	A0A498NKK1					plgrkt	A0A498MFA2		dctn2	A0A498NC63		dnajc12	A0A498LNK7		txndc12	A0A498NUQ3		sec23b	A0A498N4Q4		emid1	A0A498NJN8		znf346	A0A498LRE1
uchl5	A0A498MAE5		npl	A0A498NR45		COQ10A	A0A498LDA0		pdlim4	A0A498N9T2		rpl21	A0A498NSE5		pofut1	A0A498M0R9					SLIRP	A0A498LU32		ssb	A0A498NSJ3		dynlt3	A0A498NPR6		mesdc2	A0A498MYN3		acad11	A0A498N594		mcm2	A0A498NLN5		ogn	A0A498N7R3
rufy3	A0A498MAE6		mutyh	A0A498NR65		kctd16	A0A498N2P7		nt5c3a	A0A498LIJ6		atp5j2	A0A498M8D4		eif2d	A0A498MG29					TMEM263	A0A498LVY2		lta4h	A0A498N9T1		fam136a	A0A498MJT0		apoe	A0A498LT17		crot	A0A498NB49		parp1	A0A498LGP1		rlbp1	A0A498MEZ4
rufy2	A0A498NAH8		rab3c	A0A498NR85		ndrg4	A0A498MQ33		dmgdh	A0A498MPE4		glrx	A0A498LZX5		cnot10	A0A498LG34					wnk2	A0A498N2P5		emid1	A0A498NJN8		r3hcc1	A0A498MR57		cfi	A0A498LLL2		acsf2	A0A498LNB8		mpdu1	A0A498MP58		mrto4	A0A498LVI3
RUFY1	A0A498NEZ1		PHKA2	A0A498NR97		wdr45	A0A498MS66		sec31b	A0A498LU62		ace	A0A498LUH0		klhdc4	A0A498M7B3					itih3	A0A498MUL6		ncoa5	A0A498L5N0		CUL7	A0A498MUU2		dcn	A0A498M9M2		grm2	A0A498LDH3		gyg1	A0A498P2U5		emc2	A0A498LFR4
smek1	A0A498MAG1		tmco1	A0A498NRB8		dgkz	A0A498N004		mtx1	A0A498MNT9		enpp1	A0A498NG94		LSP1	A0A498MJ49					PCYOX1L	A0A498LC68		mpdu1	A0A498MP58		stxbp2	A0A498LF85		EPB41L2	A0A498LCY6		glyctk	A0A498L616		txndc12	A0A498NUQ3		rs1	A0A498NPQ6
fgl2	A0A498MAG7		fbp2	A0A498NRE8		plbd1	A0A498M7Q3		cadm1	A0A498N1X4		EML4	A0A498MVJ2		SEC16A	A0A498NGZ9					eif2a	A0A498NTQ4		gyg1	A0A498P2U5		snx7	A0A498NDM4		c9	A0A498LPL8		cyp1a	A0A498MGE6		apoe	A0A498LT17		crygn	A0A498M4R5
trmt1l	A0A498MAH8		magoh	A0A498NRF7		pdk3	A0A498MVA7		srpx	A0A498N4E7		slc25a20	A0A498MA61		cpvl	A0A498NPD7					PLEKHA6	A0A498LE89		akap12	A0A498NCA7		tes	A0A498MJX4		fgg	A0A498LEH5		fah	A0A498NA62		drap1	A0A498NF34		spcs3	A0A498LC14
nrip2	A0A498MAH9		emc6	A0A498NRH0		pcif1	A0A498LB19		atp8a1	A0A498N580		lman1	A0A498LJT3		dph5	A0A498MGT9					tinagl1	A0A498MW04		txndc12	A0A498NUQ3		ktn1	A0A498LSE6		aar2	A0A498N663		agxt	A0A498L8H1		cfi	A0A498LLL2		banf1	A0A498MYH6
dut	A0A498MAI2		NKPD1	A0A498NRI4		madd	A0A498MNY2		CUL7	A0A498MUU2		bpnt1	A0A498N514		mrps5	A0A498N6R0					mtm1	A0A498MT66		mesdc2	A0A498MYN3		xab2	A0A498N3W7		prelp	A0A498MSP0		rcn3	A0A498NP50		dcn	A0A498M9M2		hint1	A0A498LW95
SPATA5	A0A498MAI7		cpox	A0A498NRK2		wdr47	A0A498LAM7		slc25a20	A0A498MA61		fblim1	A0A498MJQ7		dnajc3	A0A498NDC8					insr	A0A498NNJ9		cfi	A0A498LLL2		ERAP1	A0A498NJS0		DHRS2	A0A498MT19		galm	A0A498N834		ITIH4	A0A498MTS8		RHEB	A0A498M6L4
slc9a1	A0A498MAK8		rab25	A0A498NRK4		neto2	A0A498MK60		FOLR1	A0A498L7K2		agxt2	A0A498LLD3		rrp9	A0A498NRL8					ptprs	A0A498MLX4		bgn	A0A498LBF9		wdr36	A0A498MDS8		dbi	A0A498LFM5		phyh	A0A498N3X7		c9	A0A498LPL8		tsta3	A0A498NTX3
arhgap1	A0A498MAL1		ppp1cc	A0A498NRR2		apba1	A0A498MMJ3		upb1	A0A498MHN3		BCHE	A0A498NT31		fnta	A0A498NBL9					asah1	A0A498NFT1		ITIH4	A0A498MTS8		TTC37	A0A498MX24		popdc2	A0A498NDV3		helb	A0A498MK68		fgg	A0A498LEH5		ssb	A0A498NSJ3
cryl1	A0A498MAL2		actr3b	A0A498NRS4		mvb12b	A0A498NIA6		asah1	A0A498NFT1		espn	A0A498M671		mrps31	A0A498NJL8					gart	A0A498MHY3		c9	A0A498LPL8		myo18a	A0A498M0Q9		sorbs1	A0A498N6L4		phyhd1	A0A498NQ68		prelp	A0A498MSP0		pdia5	A0A498NHN2
rnf114	A0A498MAL6		tagln3	A0A498NRS5		capza1	A0A498MN53		NCBP1	A0A498N4T4		chdh	A0A498M851		nup43	A0A498MI74					lta4h	A0A498N9T1		fgg	A0A498LEH5		ppl	A0A498NI43		f8	A0A498NEE6		sdr16c5	A0A498NIH3		gstz1	A0A498LVZ9		lta4h	A0A498N9T1
chrm4	A0A498MAM1		slc25a3	A0A498NRX4		pdk1	A0A498LGU8		NAGK	A0A498NUS0		aip	A0A498L7Y3		impad1	A0A498N9H2					srpx	A0A498N4E7		prelp	A0A498MSP0		sec63	A0A498M794		plg	A0A498MP37		hyi	A0A498MHW3		tysnd1	A0A498MTV6		emid1	A0A498NJN8
ptpn5	A0A498MAN1		ttc39a	A0A498NRY0		pdk4	A0A498N255		ndufa2	A0A498NC16		C19orf66	A0A498N6Z3		C7orf25	A0A498LNR8					calu	A0A498MEU8		DHRS2	A0A498MT19		gba2	A0A498MJL2		pkp3	A0A498L903		hsd11b1l	A0A498NGY1		sorbs2	A0A498MUC4		ganab	A0A498N589
dennd4c	A0A498MAQ4		col6a1	A0A498NRY6		adap1	A0A498NHF3		acsl5	A0A498LRL0		INPP1	A0A498LTV9		rrs1	A0A498N4V0					pknox1	A0A498LCK2		dbi	A0A498LFM5		itga9	A0A498LMS0		cetp	A0A498MH61		ak4	A0A498NVU3		plg	A0A498MP37		akap12	A0A498NCA7
cbfb	A0A498MAS0		fbln1	A0A498NRZ2		syn1	A0A498MBU0		rpl14	A0A498N3B3		ptx3	A0A498MTN1		snrnp40	A0A498MZK9					pdlim4	A0A498N9T2		sorbs1	A0A498N6L4		col15a1	A0A498P4N0		agt	A0A498N0U2		dcxr	A0A498NAW3		pkp3	A0A498L903		txndc12	A0A498NUQ3
necab2	A0A498MAU4		sh3gl1	A0A498NS04		SYN3	A0A498N690		thbs1	A0A498M5X4		endou	A0A498L5V8		nup37	A0A498MFK6					lama4	A0A498M9X2		plg	A0A498MP37		myo1b	A0A498NA85		bves	A0A498LHJ8		gstz1	A0A498LVZ9		f8	A0A498NEE6		BFSP1	A0A498N6I2
ARPIN	A0A498MAU7		sypl2	A0A498NS18		cdh2	A0A498LWB5		phactr4	A0A498L9H5		gart	A0A498MHY3		amacr	A0A498N563					serpinf1	A0A498LG29		sorbs2	A0A498NXI8		fkbp9	A0A498N0E3		TRIP10	A0A498L7Z4		TPMT	A0A498NAT0		coasy	A0A498L3R0		bgn	A0A498LBF9
DGKG	A0A498NM25		actr10	A0A498NS30		mprip	A0A498L463		ndufb3	A0A498LJ72		tsfm	A0A498L5Y4		dync1li1	A0A498MZQ8					SEC16A	A0A498NGP9		wapal	A0A498NCJ1		usp10	A0A498NJ04		angptl7	A0A498LVX8		fahd1	A0A498MF21		agt	A0A498N0U2		ITIH4	A0A498MTS8
hoga1	A0A498MAV9		gars	A0A498NS73		grm2	A0A498NRE0		unc45a	A0A498MT24		bcat1	A0A498MEK8		pcid2	A0A498MBR3					mtx1	A0A498MNT9		etfdh	A0A498LWE7		mgea5	A0A498NBS6		lad1	A0A498LJ20		cmbl	A0A498LJP4		pdhx	A0A498M637		kera	A0A498MFI8
pik3ca	A0A498NR51		dap	A0A498NSA5		apeh	A0A498MLK0		nid2	A0A498LTT6		C12orf10	A0A498NJE4		d2hgdh	A0A498NSH1					nif3l1	A0A498N151		cetp	A0A498MH61		gmps	A0A498LQI3		apobec2	A0A498MYI0		MARC2	A0A498LSC4		angptl7	A0A498LVX8		c9	A0A498LPL8
kiaa1147	A0A498MAW4		rpl21	A0A498NSE5		PHKA2	A0A498NR97		nid1	A0A498LVN4		asah1	A0A498NFT1		pisd	A0A498MEX3					slc25a20	A0A498MA61		coasy	A0A498L3R0		clasp2	A0A498N3F4		MPST	A0A498NM22		spcs2	A0A498LTL5		TRIP10	A0A498L7Z4		fgg	A0A498LEH5
bre	A0A498MAW6		apom	A0A498NSF4		gstp1	A0A498NEU1		fah	A0A498NA62		nif3l1	A0A498N151		smyd5	A0A498NT34					aimp1	A0A498LLM0		agt	A0A498N0U2		polr2a	A0A498LS48		clpp	A0A498N353		manf	A0A498MIU3		lad1	A0A498LJ20		prelp	A0A498MSP0
xrcc5	A0A498MAX0		eef1d	A0A498NSH4		unc119b	A0A498M894		serpind1	A0A498NI15		dnajc12	A0A498LNK7		HTRA2	A0A498MYC4					EML4	A0A498MVJ2		angptl7	A0A498LVX8		asns	A0A498M0X4		eci1	A0A498MX93		sccpdh	A0A498N3L1		adhfe1	A0A498NT75		sag	A0A498MCQ3
zwilch	A0A498MAX6		ssb	A0A498NSJ3		ube3c	A0A498MBZ5		acan	A0A498MLI6		bcam	A0A498LRE4		slc25a25	A0A498LQC1					ppcs	A0A498MSK6		TRIP10	A0A498L7Z4		palld	A0A498MDT9		csrp3	A0A498LSX4		CUTA	A0A498NKY3		MPST	A0A498NM22		acvr2b	A0A498L7R7
lcp1	A0A498MAX9		drg1	A0A498NSN9		gga1	A0A498N338		dpp4	A0A498NJ89		reep5	A0A498M3F5		plbd1	A0A498M7Q3					gapvd1	A0A498MG61		apobec2	A0A498MYI0		ECE2	A0A498LV26		hspb2	A0A498M953		FAAH	A0A498NS72		myl7	A0A498M2W3		grifin	A0A498MGJ7
pls3	A0A498MZT6		akt1	A0A498NSQ3		lamb2	A0A498L2K9		itih2	A0A498L9R8		rras	A0A498NPH6		RNF157	A0A498LWK4					tpp1	A0A498M886		MPST	A0A498NM22		osbp	A0A498LL08		acy1	A0A498N1Q7		dapl1	A0A498M7T0		gabrd	A0A498M145		DHRS2	A0A498MT19
pls1	A0A498NV44		elavl4	A0A498NSV6		maea	A0A498LV80		serpinc1	A0A498MH64		arl9	A0A498N6B9		rbm14	A0A498NCE7					ABCF3	A0A498NA79		agmat	A0A498LQL0		sec31a	A0A498M2A4		C6orf58	A0A498LD72		NAGK	A0A498NUS0		clpp	A0A498N353		omp	A0A498NUR6
CLCC1	A0A498MAY6		ahnak	A0A498NSX2		sel1l	A0A498N1D0		lama4	A0A498M9X2		helb	A0A498MK68		tmf1	A0A498MR76					tgm1	A0A498LCV7		gabrd	A0A498M145		pald1	A0A498LU52		ALPK1	A0A498NF89		ptrh2	A0A498LH90		eci1	A0A498MX93		dbi	A0A498LFM5
PLLP	A0A498MAZ2		PLCB4	A0A498NSX7		slc6a9	A0A498P765		rcn3	A0A498NP50		C11orf65	A0A498N5G5		edc3	A0A498MPG3					CUL7	A0A498MUU2		auh	A0A498LUF6		C16orf62	A0A498NRN3		rpia	A0A498MZ96		ctsc	A0A498N5Q8		wrb	A0A498NQE4		sorbs2	A0A498MUC4
larp6	A0A498MB00		rab27a	A0A498NT07		inpp5f	A0A498MUT5		capza1	A0A498MN53		hps4	A0A498LCF8		orc4	A0A498NKL2					ndufa2	A0A498NC16		clpp	A0A498N353		scarb2	A0A498N1B9		sptlc2	A0A498NKS8		ppid	A0A498LWH4		csrp3	A0A498LSX4		cdh2	A0A498M627
nup93	A0A498MB05		acot9	A0A498NT14		dhrs12	A0A498N7U4		apom	A0A498NSF4		crip1	A0A498LGM3		slc25a24	A0A498MBM2					casp6	A0A498NPC7		wrb	A0A498NQE4		smurf2	A0A498MEG6		lamp2	A0A498LL15		hmox1	A0A498MMA3		chchd10	A0A498NKQ8		sorbs1	A0A498N6L4
bbs2	A0A498MB14		naa50	A0A498NT28		mfn1	A0A498MRK5		acmsd	A0A498N8L8		mtdh	A0A498MZF4		aarsd1	A0A498LUG3					DGKG	A0A498NM25		coq10b	A0A498N7V9		ELMO3	A0A498MR31		coasy	A0A498L3R0		pls1	A0A498NV44		rcn3	A0A498NP50		plg	A0A498MP37
mrpl16	A0A498MB56		BCHE	A0A498NT31		HOMER2	A0A498MAW9		plbd1	A0A498M7Q3		tnmd	A0A498NBV8		sh3gl1	A0A498NS04					psph	A0A498M0I8		gns	A0A498MSP6		nipbl	A0A498MPN9		psmd10	A0A498NUH3		tpp1	A0A498M886		gns	A0A498MSP6		wapal	A0A498NCJ1
n6amt2	A0A498MB63		pak1	A0A498NT33		lgi1	A0A498LX10		dbnl	A0A498NAE7		wdr18	A0A498NJJ6		pelo	A0A498NLI9					gla	A0A498NBU7		C6orf58	A0A498LD72		strn3	A0A498MVV8		arpc5	A0A498LDJ8		ppil1	A0A498LDE1		acy1	A0A498N1Q7		coasy	A0A498L3R0
srcin1	A0A498MB83		bsg	A0A498NT52		mapkapk2	A0A498MRD8		bcan	A0A498NFL2		lrrc17	A0A498M9T9		hgs	A0A498L6D4					tpd52	A0A498MLK3		ndrg4	A0A498MQ33		SCYL2	A0A498L9W6		srsf9	A0A498MHG4		fasn	A0A498LY61		C6orf58	A0A498LD72		agt	A0A498N0U2
alad	A0A498MB86		lactb2	A0A498NT66		psmb2	A0A498MZP1		cspg4	A0A498LE97		PTGFRN	A0A498LFK1		kyat1	A0A498LQ81					nhp2	A0A498LPL2		rgn	A0A498NNC6		exoc2	A0A498N335		dpp7	A0A498LRS8		vars	A0A498LBP2		ndrg4	A0A498MQ33		TRIP10	A0A498L7Z4
aox1	A0A498MB87		twf1	A0A498NTA0		nptx1	A0A498MAN8		gnmt	A0A498LU93		ptprs	A0A498MLX4		cacybp	A0A498MQB2					pdlim7	A0A498N7X2		mep1b	A0A498NP29		gclc	A0A498MZ28		mlec	A0A498MDW3		apeh	A0A498MLK0		apmap	A0A498NDS9		angptl7	A0A498LVX8
calb2	A0A498MBC2		arf6	A0A498NTC1		UNC13C	A0A498NTC3		WDR1	A0A498MPH1		tapbp	A0A498M2R2		isy1	A0A498NJD5					nup37	A0A498MFK6		ALPK1	A0A498NF89		eif2b4	A0A498M459		denr	A0A498N0M9		apoa1bp	A0A498M809		ALPK1	A0A498NF89		cpox	A0A498NRK2
pros1	A0A498MBF2		UNC13C	A0A498NTC3		elmo1	A0A498N309		acp6	A0A498L8J9		hapln3	A0A498MJW1		lrpap1	A0A498MJN9					esd	A0A498N9Q6		ctsa	A0A498L5Q4		sun1	A0A498NTM2		akr1a1	A0A498NTT9		psmd5	A0A498NGP6		ctsa	A0A498L5Q4		MPST	A0A498NM22
fgfr1op	A0A498MBG1		g3bp1	A0A498NTC7		rbbp5	A0A498LBC2		serpinf1	A0A498LG29		tdrd5	A0A498MP71		OGFOD3	A0A498LRE0					akap12	A0A498NCA7		rpia	A0A498MZ96		lbr	A0A498LKS9		prss16	A0A498MU91		SSH3	A0A498LKX2		endou	A0A498L5V8		agmat	A0A498LQL0
mrpl39	A0A498MBG2		tmed9	A0A498NTD8		acsl5	A0A498LRL0		hyi	A0A498MHW3		ublcp1	A0A498LRX4		carhsp1	A0A498N7T4					col6a6	A0A498LQS3		slc4a1	A0A498LX14		dph5	A0A498MGT9		adk	A0A498N453		ethe1	A0A498LA32		rpia	A0A498MZ96		auh	A0A498LUF6
sf3b3	A0A498MBG5		rps3	A0A498NTE0		htra1	A0A498NE24		ggct	A0A498LE09		pbld	A0A498N4R3		coq6	A0A498LSD3					cast	A0A498LJR2		pip4k2c	A0A498LNL7		tbl2	A0A498NA28		erap2	A0A498MIP9		supt16h	A0A498NW20		WDR1	A0A498MPH1		clic2	A0A498LIJ7
vangl2	A0A498MBI3		pycrl	A0A498NTF0		bdh1	A0A498LTZ8		blvra	A0A498N0E6		camlg	A0A498M509		dhrs7b	A0A498LZ39					serpind1	A0A498NI15		wdr18	A0A498NJJ6		nup43	A0A498MI74		upp1	A0A498MVF6		KIF25	A0A498MHB2		slc4a1	A0A498LX14		tnni1	A0A498MJC0
C16orf70	A0A498MBI5		hspa4	A0A498NTF6		cryl1	A0A498MAL2		nccrp1	A0A498LE53		C11orf54	A0A498N1E7		snx9	A0A498N326					optc	A0A498MSQ5		epcam	A0A498MSX6		nadk2	A0A498NC90		mpc2	A0A498NAY0		cops7a	A0A498LG70		lamp2	A0A498LL15		blvrb	A0A498MNG1
L3MBTL4	A0A498MBK5		BOLA2B	A0A498NTF7		abcb1	A0A498N7F2		lxn	A0A498M4K7		sugt1	A0A498NED4		yars2	A0A498NTP0					LGALS3	A0A498LH57		atp5h	A0A498LBS5		gpt2	A0A498MJ55		hacd2	A0A498NHQ0		calu	A0A498MEU8		epcam	A0A498MSX6		rbp3	A0A498MVB9
atad3a	A0A498MBL7		HSP90AA1	A0A498NTH7		itsn2	A0A498MWU4		LRG1	A0A498M2U1		wbp2	A0A498LKH3		phax	A0A498M070					sorbs3	A0A498MGG0		GLOD5	A0A498N8L5		LMTK3	A0A498NJ80		agpat3	A0A498NKN5		edc4	A0A498MLW3		gnmt	A0A498LU93		C6orf58	A0A498LD72
ndufaf3	A0A498MBM7		inf2	A0A498NTJ6		ISYNA1	A0A498MX03		ambp	A0A498MNZ5		SCO1	A0A498MKC8		fkbp8	A0A498MM53					itih2	A0A498L9R8		hat1	A0A498LNL0		hacl1	A0A498NN40		plaa	A0A498NVE1		itga1	A0A498MJY7		pwp1	A0A498N9D0		ndrg4	A0A498MQ33
sirt3	A0A498MBN8		eef1g	A0A498NTK4		gabpa	A0A498N461		cpvl	A0A498NPD7		sod3	A0A498MH86		nadk2	A0A498NC90					fbn1	A0A498M6Z5		arpc5	A0A498LDJ8		dnajb11	A0A498NEV1		AHNAK2	A0A498MWM5		sart3	A0A498NGA8		GLOD5	A0A498N8L5		apmap	A0A498NDS9
api5	A0A498MBP6		aamdc	A0A498NTK6		ppm1k	A0A498LV02		AHSG	A0A498N4I5		c1qbp	A0A498NKL6		SLC25A51	A0A498NDA5					btd	A0A498LYJ5		srsf9	A0A498MHG4		pofut1	A0A498M0R9		tpr	A0A498LDV6		agrn	A0A498P1C8		rnps1	A0A498NUH6		ALPK1	A0A498NF89
hsd17b12	A0A498MW42		tufm	A0A498NTL2		ndufa6	A0A498MHB9		ND1	H9C4W4		hagh	A0A498MFI3		pno1	A0A498LU40					dhcr24	A0A498LDP8		ass1	A0A498MVZ3		RNF157	A0A498LWK4		sardh	A0A498MXH8		clgn	A0A498MT53		hat1	A0A498LNL0		ctsa	A0A498L5Q4
pcdh10	A0A498MBQ0		eif2a	A0A498NTQ4		PTPRN2	A0A498NSM6		ctsa	A0A498L5Q4		sri	A0A498LG84		srp19	A0A498N377					c9	A0A498LPL8		dpp7	A0A498LRS8		ppt1	A0A498MZL6		h6pd	A0A498LNH7		nsun2	A0A498MNR7		itga9	A0A498LMS0		WDR1	A0A498MPH1
gpa33	A0A498MBQ2		akr1a1	A0A498NTT9		ptprn	A0A498N744		lgals2	A0A498NLB5		srp19	A0A498N377		stxbp5l	A0A498NEW7					bcap29	A0A498NZ72		anxa3	A0A498MM94		bre	A0A498MAW6		ctnnd1	A0A498MKM0		dis3	A0A498L404		arpc5	A0A498LDJ8		gnmt	A0A498LU93
ERMP1	A0A498MBQ7		fkbp3	A0A498NTU1		zmiz2	A0A498N9I9		pbld	A0A498N6F0		ubxn6	A0A498MPQ1		bzw1	A0A498LKG8					olfml3	A0A498ML14		mlec	A0A498MDW3		ACSF3	A0A498MK36		FAM114A2	A0A498M1F3		mcm4	A0A498MW63		srsf9	A0A498MHG4		pwp1	A0A498N9D0
pcid2	A0A498MBR3		tsta3	A0A498NTX3		rdh12	A0A498LUW8		psph	A0A498M0I8		C6orf211	A0A498N0J6		rcc1	A0A498L913					apom	A0A498NSF4		lama4	A0A498M9X2		MARC2	A0A498LSC4		lman1	A0A498LJT3		eif2a	A0A498NTQ4		dpp7	A0A498LRS8		rnps1	A0A498NUH6
vps18	A0A498MBR8		farsb	A0A498NU48		l3mbtl1	A0A498MXA6		mdk	A0A498M8K8		pip4k2c	A0A498LNL7		mrpl46	A0A498NFK4					CKAP4	A0A498NT67		denr	A0A498N0M9		cnn1	A0A498LNC0		gmppa	A0A498NPA3		rangap1	A0A498LRL2		rtn4ip1	A0A498N9R5		ap1s2	A0A498NJR7
dnajb1	A0A498MBS7		cdk1	A0A498NU75		eya3	A0A498MNH3		scp2	A0A498M8P4		lhpp	A0A498LNX9		mecr	A0A498LT82					acmsd	A0A498N8L8		akr1a1	A0A498NTT9		cnn3	A0A498N571		fah	A0A498NA62		dync1i2	A0A498LP67		denr	A0A498N0M9		psmd10	A0A498NUH3
syn1	A0A498MBU0		uap1	A0A498NU86		eps8l2	A0A498LRM9		ndufa5	A0A498MSQ9		comtd1	A0A498LQ30		ublcp1	A0A498LRX4					ctsz	A0A498LKT3		rbp7	A0A498LV21		decr2	A0A498MPU1		galm	A0A498N834		xrcc6	A0A498LGY5		aadacl4	A0A498N5A8		srsf9	A0A498MHG4
SYN3	A0A498N690		pin4	A0A498NU90		vta1	A0A498LDA8		cnn2	A0A498P452		dcps	A0A498MCN8		SYMPK	A0A498MQF4					gpt	A0A498NM13		pcnx	A0A498LHW1		gpt	A0A498NM13		grhpr	A0A498N971		rpa1	A0A498LHR7		pcnx	A0A498LHW1		mlec	A0A498MDW3
syn2	A0A498NJI5		myo7a	A0A498NUD1		RHEB	A0A498M6L4		glrx	A0A498LZX5		pdxk	A0A498LCE5		pcyox1	A0A498MM46					ppm1f	A0A498LFN2		prss16	A0A498MU91		carhsp1	A0A498N7T4		dhrs1	A0A498L4Y6		lbr	A0A498LKS9		prss16	A0A498MU91		denr	A0A498N0M9
dock8	A0A498MBV6		gm2a	A0A498NUE1		rhebl1	A0A498MTE3		npc2	A0A498LSC6		bcas2	A0A498P2D9		fam49a	A0A498LDK9					adprh	A0A498M566		rbp4	A0A498LVA3		coq6	A0A498LSD3		phyh	A0A498N3X7		UBXN4	A0A498P3E8		ehhadh	A0A498NB48		rbp7	A0A498LV21
ACP2	A0A498MBX8		TSTD1	A0A498NUI3		sdcbp	A0A498LUF9		pfn1	A0A498LJP3		rbbp9	A0A498LZI5		dcps	A0A498MCN8					ddah2	A0A498MD47		lamtor3	A0A498MDH4		kyat1	A0A498LQ81		helb	A0A498MK68		spata18	A0A498M7E9		lamtor3	A0A498MDH4		asl	A0A498LPJ7
ddx20	A0A498MBX9		sparc	A0A498NUJ1		sirt5	A0A498LB15		cdkn2aipnl	A0A498N2U4		TPPP2	A0A498LIE2		FAM98C	A0A498MME2					sh3glb1	A0A498M723		erap2	A0A498MIP9		kpna3	A0A498NKE3		nat1	A0A498M4Z9		shbg	A0A498LBR0		dnajc12	A0A498LNK7		prss16	A0A498MU91
scrib	A0A498MC02		pgm1	A0A498NUJ2		ccny	A0A498LXJ2		sidt2	A0A498L2U2		ndufa11	A0A498NJS7		crlf3	A0A498NIK4					nhlrc2	A0A498LPK8		slc30a7	A0A498MUC9		adpgk	A0A498NRY1		sdr16c5	A0A498NIH3		vrk1	A0A498LMR7		erap2	A0A498MIP9		rbp4	A0A498LVA3
hao1	A0A498MC15		hspa12b	A0A498NUL7		diras1	A0A498LMH2		gart	A0A498MHY3		RPL27A	A0A498M799		anxa3	A0A498MM94					dak	A0A498MJD4		plaa	A0A498NVE1		pcyox1	A0A498MM46		sccpdh	A0A498N3L1		hexdc	A0A498LRC0		upp1	A0A498MVF6		lamtor3	A0A498MDH4
ube2m	A0A498MC44		txndc12	A0A498NUQ3		ERAP1	A0A498NJS0		COX2	H9C4W7		dapl1	A0A498M7T0		cdv3	A0A498N7N0					ankrd55	A0A498LW93		tpr	A0A498LDV6		rcc1	A0A498L913		dcxr	A0A498NAW3		galk2	A0A498N6I1		hacd2	A0A498NHQ0		adk	A0A498N453
rpl31	A0A498MC52		omp	A0A498NUR6		synj1	A0A498P4W8		rnf103	A0A498MV71		mcee	A0A498L6Z5		rwdd1	A0A498NIQ8					gnmt	A0A498LU93		sec63	A0A498M794		dab2	A0A498LQA2		ak4	A0A498NVU3		ccbl2	A0A498M4C1		fads2	A0A498LQZ2		erap2	A0A498MIP9
masp1	A0A498MC61		NAGK	A0A498NUS0		ankfy1	A0A498LYZ7		COMMD6	A0A498L497		ndufa12	A0A498L9Q3		capns1	A0A498LHL4					endou	A0A498L5V8		h6pd	A0A498LNH7		tfg	A0A498NEM1		TPMT	A0A498NAT0		sirt2	A0A498NP11		slc30a7	A0A498MUC9		plaa	A0A498NVE1
gne	A0A498MC65		tgfbi	A0A498NUS4		gja1	A0A498LPU3		cd9	A0A498MN46		NDUFC2	A0A498MXI2		mrps26	A0A498MZC7					srpx2	A0A498LPR7		sec23b	A0A498N4Q4		map1s	A0A498MS83		cmbl	A0A498LJP4		fen1	A0A498N5C0		agpat3	A0A498NKN5		tpr	A0A498LDV6
mrpl44	A0A498MC72		farsa	A0A498NUW6		nt5dc2	A0A498N2V7		aimp2	A0A498NC19		f10	A0A498MBE1		nab2	A0A498LSV1					cryz	A0A498P4F6		FAM114A2	A0A498M1F3		dhrs7b	A0A498LZ39		gstz1	A0A498LVZ9		aimp1	A0A498LLM0		ptplad1	A0A498MFV3		uso1	A0A498NFH4
nt5c3b	A0A498MC78		eif4a2	A0A498NUZ0		pdgfrb	A0A498N9F4		p3h1	A0A498MXX1		abhd14b	A0A498L5N4		nifk	A0A498NHP2					PPA2	A0A498NX57		grm2	A0A498LDH3		sult6b1	A0A498LLM4		spcs2	A0A498LTL5		snrnp40	A0A498MZK9		plaa	A0A498NVE1		grm2	A0A498LDH3
agfg1	A0A498MCA5		cct7	A0A498NUZ4		nde1	A0A498NMS4		lama2	A0A498P6D3		cadm4	A0A498LQ06		enoph1	A0A498LUE7					KYNU	A0A498NKT3		lman1	A0A498LJT3		ostf1	A0A498MRW3		manf	A0A498MIU3		cnn1	A0A498LNC0		vkorc1	A0A498N436		ttc38	A0A498MXZ7
fam101a	A0A498MCA7		mapk14	A0A498NV34		fam126a	A0A498LXT8		plg	A0A498MP37		negr1	A0A498LIT5		mrpl12	A0A498L6M4					galns	A0A498ML35		cyp1a	A0A498MEQ7		snf8	A0A498LGX1		CUTA	A0A498NKY3		sgpl1	A0A498MUV0		xdh	A0A498MQ50		hsd17b4	A0A498NEL9
polr3h	A0A498MCD6		pls1	A0A498NV44		trappc9	A0A498LP02		serpine2	A0A498MRK0		entpd1	A0A498LMR9		lmo7	A0A498MEA4					acp6	A0A498L8J9		hgd	A0A498N1P6		galns	A0A498ML35		gstk1	A0A498NIZ5		fahd2a	A0A498NL77		AHNAK2	A0A498MWM5		phyh	A0A498N3X7
mynn	A0A498MCG6		pglyrp2	A0A498NV49		ptpre	A0A498LNW6		dync1li2	A0A498LWA9		LSAMP	A0A498L7M3		ATG101	A0A498L8E1					C6orf58	A0A498LD72		acaa1	A0A498LP08		tysnd1	A0A498MTV6		tysnd1	A0A498MTV6		FRG1	A0A498MUB4		tpr	A0A498LDV6		helb	A0A498MK68
slc25a46	A0A498MCI8		ilf3	A0A498NVH4		camk4	A0A498M9Q6		eci2	A0A498M2P5		lrpprc	A0A498N968		exosc1	A0A498LQQ5					agxt2	A0A498LLD3		helb	A0A498MK68		timm8b	A0A498LTE7		rpl14	A0A498N3B3		lactb2	A0A498NT66		phex	A0A498MJE5		sccpdh	A0A498N3L1
FHOD1	A0A498MWH3		ak4	A0A498NVU3		upp1	A0A498MVF6		HPGD	A0A498L7V7		etfdh	A0A498LWE7		wars2	A0A498N8Q8					mmp2	A0A498MP00		sdr16c5	A0A498NIH3		ATG101	A0A498L8E1		dapl1	A0A498M7T0		tpd52	A0A498MLK3		sec63	A0A498M794		ak4	A0A498NVU3
C11orf30	A0A498MCN4		col11a1	A0A498NVZ6		enoph1	A0A498LUE7		FBLN7	A0A498LM03		HOMER2	A0A498MAW9		COQ5	A0A498NGF1					ppt1	A0A498MZL6		sccpdh	A0A498N3L1		ndufa12	A0A498L9Q3		lsm7	A0A498NBE3		magt1	A0A498N4G3		fam114a1	A0A498NA38		dcxr	A0A498NAW3
dcps	A0A498MCN8		cpa1	A0A498NWE3		wdfy3	A0A498N3S2		GPR108	A0A498M207		mpp1	A0A498NE61		ndufa12	A0A498L9Q3					uchl1	A0A498MUF4		hsd11b1l	A0A498NGY1		lhpp	A0A498LNX9		C4orf27	A0A498MGN9		nit1	A0A498MI47		tmem214	A0A498LN85		qdpr	A0A498M4G6
NHLRC3	A0A498MCR3		txndc9	A0A498NWS8		rbm15	A0A498L9J0		nqo1	A0A172E1Q5		pdc	A0A498LL10		mrps10	A0A498M090					reep5	A0A498M3F5		ak4	A0A498NVU3		cdc16	A0A498N748		hmox1	A0A498MMA3		fkbp3	A0A498NTU1		crot	A0A498NB49		TPMT	A0A498NAT0
chmp7	A0A498MCR5		PPA2	A0A498NX57		TBC1D9B	A0A498N5S2		clic2	A0A498LIJ7		ndufb8	A0A498LKL7		CARKD	A0A498LY36					vtn	A0A498LQ67		dcxr	A0A498NAW3		ppil1	A0A498LDE1		alox5	A0A498MWJ2		abhd10	A0A498MFZ3		glyctk	A0A498L616		cmbl	A0A498LJP4
bcmo1	A0A498MCU0		fbxl13	A0A498NX97		exoc2	A0A498N335		ctsb	A0A498MHB7		ndufb7	A0A498MI42		lhpp	A0A498LNX9					lxn	A0A498M4K7		TPMT	A0A498NAT0		CARKD	A0A498LY36		pls1	A0A498NV44		tango2	A0A498NJN4		acsf2	A0A498LNB8		gstz1	A0A498LVZ9
DHX36	A0A498MCU7		EFEMP1	A0A498NXA1		ttpal	A0A498N8J5		sdf2l1	A0A498LFI5		ndufa7	A0A498LW32		exosc5	A0A498L7U9					f3	A0A498N6U4		cmbl	A0A498LJP4		gnpnat1	A0A498LM02		RHOBTB3	A0A498LZE0		arl9	A0A498N6B9		grm2	A0A498LDH3		CALD1	A0A498MUT6
pgm2l1	A0A498MCX4		mtap	A0A498NXD1		sgsm1	A0A498NG93		pdlim2	A0A498MLE9		KIFC2	A0A498N1K4		elp5	A0A498NJK9					C11orf54	A0A498N1E7		gstz1	A0A498LVZ9		AP3S1	A0A498NA52		apeh	A0A498MLK0		rabif	A0A498P0D0		cyp1a	A0A498MGE6		CUTA	A0A498NKY3
kctd6	A0A498MPS9		tial1	A0A498NXY1		pik3r1	A0A498MKL0		itgav	A0A498N1H6		gusb	A0A498P2N1		mtx3	A0A498MX07					pbld	A0A498N6F0		spcs2	A0A498LTL5		scpep1	A0A498NM74		psmd5	A0A498NGP6		acp1	A0A498LQP8		gmppa	A0A498NPA3		piwil1	A0A498M5S1
UHRF2	A0A498MD18		pfdn1	A0A498NYC1		camkv	A0A498LBD9		gstk1	A0A498NIZ5		xrcc6	A0A498LGY5		gpn3	A0A498NKJ5					smpdl3b	A0A498LTC9		CUTA	A0A498NKY3		COQ5	A0A498NGF1		SSH3	A0A498LKX2		ssbp1	A0A498MN52		ttc38	A0A498MXZ7		rpl14	A0A498N3B3
myo6	A0A498MBW3		cav2	A0A498NYV6		caskin1	A0A498NMV1		PDCL3	A0A498MDM7		sos1	A0A498MSY3		mcat	A0A498MNP7					aadac	A0A498M1J0		smyd1	A0A498M2F7		tsnaxip1	A0A498MFR0		ethe1	A0A498LA32		tsnaxip1	A0A498MFR0		agxt	A0A498L8H1		CASR	A0A498LFT2
aass	A0A498MD26		bcap29	A0A498NZ72		gad2	A0A498LWD9		gpx4	A0A498MGM1		IGLON5	A0A498NX52		atpaf2	A0A498LGK7					aimp2	A0A498NC19		pcmt1	A0A498MN94		efnb1	A0A498N3G6		sart3	A0A498NGA8		tfg	A0A498NEM1		espnl	A0A498LFU9		dapl1	A0A498M7T0
rps18	A0A498MD37		pdlim1	A0A498NZA9		srcin1	A0A498MB83		LGALS3	A0A498LH57		fxr2	A0A498MYT5		sdf2l1	A0A498LFI5					LRG1	A0A498M2U1		rpl14	A0A498N3B3		sh3bgrl2	A0A498LCP1		nrd1	A0A498LJ54		mpp1	A0A498NE61		AMDHD1	A0A498MXR7		nasp	A0A498NUH2
ddah2	A0A498MD47		atp5j	A0A498NZF5		slc32a1	A0A498NBW2		atp5j	A0A498NZF5		papss2	A0A498NFB2		unc119b	A0A498M894					cpm	A0A498L9T1		dapl1	A0A498M7T0		plgrkt	A0A498MFA2		tgm1	A0A498LCV7		pcyt1b	A0A498MYA5		galm	A0A498N834		NAGK	A0A498NUS0
bop1	A0A498MD48		pter	A0A498NZP2		TTN	A0A498NZ39		pls1	A0A498NV44		hacl1	A0A498NN40		rpp25l	A0A498NKH6					ambp	A0A498MNZ5		apoe	A0A498LT17		abcd3	A0A498NDM8		skiv2l2	A0A498M7N4		bckdk	A0A498MP23		dhrs1	A0A498L4Y6		galns	A0A498ML35
gys1	A0A498LZL8		csrp2	A0A498NZS0		tfcp2	A0A498LI31		TRIP10	A0A498L7Z4		dse	A0A498M3M7		mrpl23	A0A498N0S9					cpvl	A0A498NPD7		nccrp1	A0A498LE53		pwp1	A0A498N9D0		uba2	A0A498M1Y0		ciao1	A0A498LL84		phyh	A0A498N3X7		manf	A0A498MIU3
gys2	A0A498MD49		lzic	A0A498P0C7		gas7	A0A498NHR7		tgm1	A0A498LCV7		AADAT	A0A498MDF7		sh3bp1	A0A498LBG3					c5	A0A498MMD9		NAGK	A0A498NUS0		slc27a6	A0A498M078		cstf3	A0A498NC45		SLC39A3	A0A498MYF6		phyhd1	A0A498NQ68		C4orf27	A0A498MGN9
alkbh3	A0A498MD60		rabif	A0A498P0D0		PDE1C	A0A498N0F5		rpa1	A0A498LHR7		smarcc1	A0A498NKA7		taf9	A0A498MA28					AHSG	A0A498N4I5		ctsc	A0A498N5Q8		pacsin2	A0A498NRM4		appl2	A0A498LHT3		dnaja3	A0A498MWI2		nat1	A0A498M4Z9		colec11	A0A498MG22
vasp	A0A498MD67		rpl36	A0A498P165		fam177a1	A0A498N6M0		CKAP4	A0A498L1I1		pcyt2	A0A498N8I4		thg1l	A0A498N439					mgat4d	A0A498LVP1		gnmt	A0A498LU93		ptgs1	A0A498N183		aspscr1	A0A498MRG9		nup35	A0A498NE60		sccpdh	A0A498N3L1		ace	A0A498LUH0
evl	A0A498P4J4		esyt1	A0A498P1N8		epn2	A0A498LCD7		cryz	A0A498P4F6		urod	A0A498LJC4		itsn2	A0A498MWU4					ND1	H9C4W4		hmox1	A0A498MMA3		tinagl1	A0A498MW04		rangap1	A0A498LRL2		dnajc9	A0A498NT54		hsd11b1l	A0A498NGY1		pls1	A0A498NV44
iah1	A0A498MD78		bcas2	A0A498P2D9		epn3	A0A498NZ28		tes	A0A498MJX4		gabpa	A0A498N461		dynlt3	A0A498NPR6					fuca2	A0A498NQ43		alox5	A0A498MWJ2		mogs	A0A498MJT7		dync1i2	A0A498LP67		emc2	A0A498LFR4		khk	A0A498MZI9		ppil1	A0A498LDE1
atp6v1f	A0A498MDB7		gyg1	A0A498P2U5		ppp2r5a	A0A498NFZ8		adprh	A0A498M566		strap	A0A498M9M9		cdc16	A0A498N748					diaph2	A0A498N160		ace	A0A498LUH0		luc7l3	A0A498LY40		xrcc6	A0A498LGY5		bag1	A0A498MKQ1		ak4	A0A498NVU3		tdrd1	A0A498LSJ7
cnot11	A0A498MDE1		hspa12a	A0A498P302		PLCL2	A0A498MSG4		spcs2	A0A498LTL5		tfam	A0A498N7L4		rnf219	A0A498MQN2					ctsa	A0A498L5Q4		tpp1	A0A498M886		pigk	A0A498NTP8		lbr	A0A498LKS9		hdhd1	A0A498L319		dcxr	A0A498NAW3		apeh	A0A498MLK0
agk	A0A498MDE3		ACTR3	A0A498P3D0		DOC2B	A0A498N1C5		hdhd1	A0A498L319		sdr39u1	A0A498NPP7		gprc5b	A0A498LUR4					npl	A0A498NR45		ppil1	A0A498LDE1		RUFY1	A0A498NEZ1		wdr76	A0A498LFG4		uchl1	A0A498MUF4		qdpr	A0A498M4G6		zw10	A0A498N5G7
AADAT	A0A498MDF7		UBXN4	A0A498P3E8		nlgn3	A0A498MT72		nhp2	A0A498LPL2		srp72	A0A498N220		lrrc47	A0A498NRA1					rpl14	A0A498N3B3		pip4k2a	A0A498L6U4		srpx	A0A498N4E7		UBXN4	A0A498P3E8		trappc4	A0A498M0T9		TPMT	A0A498NAT0		psmd5	A0A498NGP6
s100b	A0A498MDG5		slc25a12	A0A498P3L6		sestd1	A0A498NHX0		ndufs5	A0A498LDC1		ppm1g	A0A498N7H5		zwilch	A0A498MAX6					lgals2	A0A498NLB5		apeh	A0A498MLK0		srsf9	A0A498MHG4		shbg	A0A498LBR0		fam213b	A0A498MNJ8		fahd1	A0A498MF21		SSH3	A0A498LKX2
lamtor3	A0A498MDH4		mob2	A0A498P3M8		gabra1	A0A498N2V5		atp5d	A0A498MGL5		ethe1	A0A498LA32		spast	A0A498LUY0					hspb7	A0A498N295		apoa1bp	A0A498M809		lamb2	A0A498L2K9		vrk1	A0A498LMR7		bud31	A0A498L5I4		MARC2	A0A498LSC4		ddi2	A0A498L5Z7
snx6	A0A498MDJ5		mbnl2	A0A498P3P4		gabrg2	A0A498N2C9		rabif	A0A498P0D0		eif2b1	A0A498MSF0		vps33b	A0A498MVL2					mdk	A0A498M8K8		psmd5	A0A498NGP6		apmap	A0A498NDS9		hexdc	A0A498LRC0		dnajc12	A0A498LNK7		spcs2	A0A498LTL5		sec31b	A0A498LU62
CPN2	A0A498MDK0		ipo5	A0A498P3P8		cacnb4	A0A498NHT2		ndufb7	A0A498MI42		cxadr	A0A498LN15		tinagl1	A0A498MW04					macrod1	A0A498N1A7		SSH3	A0A498LKX2		ATXN3	A0A498MT57		kiaa1715	A0A498LG57		fam136a	A0A498MJT0		acbd5	A0A498LTW2		tgm1	A0A498LCV7
psma3	A0A498MDK5		pygb	A0A498P430		cnrip1	A0A498LNC9		atp5j2	A0A498M8D4		myef2	A0A498M698		pigs	A0A498M1D4					ndufa5	A0A498MSQ9		ethe1	A0A498LA32		LGALS3	A0A498LH57		lnpb	A0A498NNC2		CUL7	A0A498MUU2		ARMC3	A0A498L6X2		STK31	A0A498NNJ4
ZNF830	A0A498MDM0		cnn2	A0A498P452		arhgap39	A0A498NS93		cdh17	A0A498NEK9		mpc2	A0A498NAY0		pxn	A0A498MQW6					glrx	A0A498LZX5		nsun2	A0A498MNR7		pdlim4	A0A498N9T2		galk2	A0A498N6I1		habp2	A0A498NEC0		CUTA	A0A498NKY3		dis3	A0A498L404
PDCL3	A0A498MDM7		rps28	A0A498P454		pars2	A0A498NUC4		itih3	A0A498MUL6		hnrnpk	A0A498NGQ1		pigk	A0A498NTP8					heatr1	A0A498N9B6		supt16h	A0A498NW20		lama4	A0A498M9X2		pip4k2c	A0A498LNL7		stat3	A0A498LWF7		FAAH	A0A498NS72		iars2	A0A498N5U1
pan2	A0A498MDS3		cryz	A0A498P4F6		arhgef4	A0A498NAN0		anxa3	A0A498MM94		pacsin1	A0A498L9V5		nup98	A0A498P3G3					znf451	A0A498MZ16		KIF25	A0A498MHB2		itgav	A0A498N1H6		sirt2	A0A498NP11		smek1	A0A498MAG1		pcmt1	A0A498MN94		tut1	A0A498NCS2
wdr36	A0A498MDS8		evl	A0A498P4J4		dnajc27	A0A498MG30		bgn	A0A498LBF9		ndufa5	A0A498MSQ9		TRIP6	A0A498MXU0					gstk1	A0A498NIZ5		edc4	A0A498MLW3		sec31b	A0A498LU62		fnta	A0A498NBL9		snw1	A0A498NLB3		gstk1	A0A498NIZ5		mcm4	A0A498MW63
rnf2	A0A498MDT8		vdac2	A0A498P5M2		nprl3	A0A498NFT9		c3	A0A498N260		psme3	A0A498LWL0		ush1c	A0A498MGB3					pfn1	A0A498LJP3		fbn1	A0A498M6Z5		FGFRL1	A0A498MGH0		ccbl2	A0A498M4C1		tes	A0A498MJX4		dhodh	A0A498MA59		mcmbp	A0A498MYU8
palld	A0A498MDT9		psmb10	A0A498P5Y7		WWC1	A0A498LU65		enpp1	A0A498NG94		vbp1	A0A498MJQ0		atxn2l	A0A498M572					cdkn2aipnl	A0A498N2U4		sec31b	A0A498LU62		arhgap10	A0A498MS51		anxa3	A0A498MM94		mmd2	A0A498MI25		rpl14	A0A498N3B3		appl2	A0A498LHT3
prpf4	A0A498MDU5		lama2	A0A498P6D3		cyp26b1	A0A498MPK9		C12orf10	A0A498NJE4		gtf3a	A0A498NRT4		ctnnbl1	A0A498NQE6					gpx7	A0A498LMD6		agrn	A0A498P1C8		mob2	A0A498LCZ3		dnajb1	A0A498MBS7		enosf1	A0A498MK24		NAGK	A0A498NUS0		aspscr1	A0A498MRG9
celf1	A0A498MDW1		gorasp2	A0A498P6G7		gabra6	A0A498NEI2		prx	A0A498NNA6		umps	A0A498N4V9		fbxl5	A0A498LJR7					sidt2	A0A498L2U2		tgm1	A0A498LCV7		cdh11	A0A498M0B0		aimp1	A0A498LLM0		nup210	A0A498MU58		lsm7	A0A498NBE3		ADAD2	A0A498MPK1
mlec	A0A498MDW3		COX2	H9C4W7		nrip2	A0A498MAH9		sccpdh	A0A498N3L1		uap1l1	A0A498LPN6		mnat1	A0A498MKR8					serpine2	A0A498MRK0		ide	A0A498LTM7		ndrg3	A0A498P389		mecr	A0A498LT82		ktn1	A0A498LSE6		ctsc	A0A498N5Q8		rangap1	A0A498LRL2
cdc37	A0A498MDY1		ATP8	H9C4W8		trim36	A0A498N2M4		kng1	A0A498MUT8		srprb	A0A498M7U4		pknox1	A0A498LCK2					WDR1	A0A498MPH1		iars2	A0A498N5U1		enosf1	A0A498MK24		snrnp40	A0A498MZK9		pitrm1	A0A498L3Z8		hmox1	A0A498MMA3		ppwd1	A0A498MS76
grpel1	A0A498MDZ5		CYTB	V5XVB7		kiaa1147	A0A498MAW4		MARC2	A0A498LSC4		mecr	A0A498LT82		LGALS3	A0A498LH57					cnn1	A0A498LNC0		dis3	A0A498L404		derl1	A0A498LTV6		cnn1	A0A498LNC0		dnajc11	A0A498L4D0		ace	A0A498LUH0		dync1i2	A0A498LP67
IPO11	A0A498ME00					rs1	A0A498NPQ6		bcam	A0A498LRE4		atp6ap2	A0A498NBF4		strada	A0A498NMS2					COX2	H9C4W7		mcmbp	A0A498MYU8		acp1	A0A498LQP8		sgpl1	A0A498MUV0		supt6h	A0A498NW55		tpp1	A0A498M886		xrcc6	A0A498LGY5
BCKDHB	A0A498ME07					rimkla	A0A498MHT7		cpeb1	A0A498M8V5		eif4enif1	A0A498L6B4		pdlim4	A0A498N9T2					mgst1	A0A498MIW9		appl2	A0A498LHT3		gapvd1	A0A498MG61		lactb2	A0A498NT66		map1s	A0A498MS83		ppil1	A0A498LDE1		sarm1	A0A498LKV6
dnaja2	A0A498ME23					gabbr2	A0A498NB71		C19orf66	A0A498N6Z3		atxn2l	A0A498M572		snf8	A0A498LGX1					bgn	A0A498LBF9		srp72	A0A498N220		tpp1	A0A498M886		mrto4	A0A498LVI3		arhgef1	A0A498NDL5		psmd5	A0A498NGP6		acss3	A0A498M0S1
GP5	A0A498ME28					gsn	A0A498NKF8		ptx3	A0A498MTN1		snx9	A0A498N326		arid4b	A0A498LLW2					psap	A0A498N4B3		aspscr1	A0A498MRG9		asah1	A0A498NFT1		tpd52	A0A498MLK3		ERAP1	A0A498NJS0		ethe1	A0A498LA32		wdr76	A0A498LFG4
cbwd1	A0A498ME31					cbl	A0A498MQQ5		CNDP1	A0A498L9Z2		glt8d1	A0A498LNH2		agrn	A0A498N4Y4					COMMD6	A0A498L497		rangap1	A0A498LRL2		ndufa2	A0A498NC16		fkbp3	A0A498NTU1		tcea1	A0A498LFL4		supt16h	A0A498NW20		UBXN4	A0A498P3E8
slc7a9	A0A498ME32					sos1	A0A498MSY3		psme2	A0A498NMM5		cpb2	A0A498L347		dnajc2	A0A498N6D1					ppp1r10	A0A498MTQ7		dync1i2	A0A498LP67		casp6	A0A498NPC7		lmo7	A0A498MEA4		trip12	A0A498MF43		fbn1	A0A498M6Z5		zwilch	A0A498MAX6
tcf25	A0A498ME33					dock3	A0A498MFT2		endou	A0A498L5V8		mia3	A0A498NSQ6		polr3f	A0A498MSI3					rbbp9	A0A498LZI5		rbm39	A0A498MJ42		gla	A0A498NBU7		abhd10	A0A498MFZ3		itsn1	A0A498NJX5		ppdpf	A0A498LWP4		shbg	A0A498LBR0
ggact	A0A498ME34					ralbp1	A0A498LCU0		tsfm	A0A498L5Y4		hspa14	A0A498LD43		mad2l1	A0A498P3E9					cd9	A0A498MN46		xrcc6	A0A498LGY5		abcb11	A0A498MNE8		hspb8	A0A498LKJ6		vwa8	A0A498MNQ1		calu	A0A498MEU8		kpna2	A0A498MFH6
mme	A0A498ME50					olfm1	A0A498MQJ9		tinagl1	A0A498MW04		kctd16	A0A498N2P7		sdf4	A0A498MXY2					DDO	A0A498NQ53		rpa1	A0A498LHR7		optc	A0A498MSQ5		arl9	A0A498N6B9		ppl	A0A498NI43		edc4	A0A498MLW3		faf2	A0A498ND52
kcmf1	A0A498ME58					rbsn	A0A498M352		agxt2	A0A498LLD3		eci1	A0A498MX93		ttc9c	A0A498MXS1					synm	A0A498MFT6		rbbp5	A0A498LBC2		DPEP3	A0A498MN92		idi1	A0A498LYI2		tmem2	A0A498NJK3		itga1	A0A498MJY7		ubxn1	A0A498N3S1
srp68	A0A498ME85					mdga2	A0A498NSZ7		cd34	A0A498LL90		mcm2	A0A498NLN5		glt8d1	A0A498LNH2					ubxn1	A0A498N3S1		lbr	A0A498LKS9		DDO	A0A498NQ53		BPHL	A0A498NTJ2		fkbp9	A0A498N0E3		YTHDC2	A0A498MVL1		hexdc	A0A498LRC0
ist1	A0A498ME94					grm1	A0A498LD59		nif3l1	A0A498N151		wbp11	A0A498P6B7		lrrcc1	A0A498LJH4					HPGD	A0A498L7V7		UBXN4	A0A498P3E8		gpc1	A0A498N4S2		hddc3	A0A498MHR4		itgb4	A0A498N603		nsun2	A0A498MNR7		galk2	A0A498N6I1
lmo7	A0A498MEA4					crat	A0A498MJ07		BCKDHB	A0A498ME07		stam2	A0A498NI83		acp1	A0A498LQP8					tlr21	A0A498N519		shbg	A0A498LBR0		nid1	A0A498LVN4		tpd52l2	A0A498N4X4		smarca2	A0A498NQS2		dis3	A0A498L404		blmh	A0A498LH75
senp8	A0A498MEC2					trappc4	A0A498M0T9		tmem50a	A0A498LMZ1		RRM1	A0A498LIA0		slc25a20	A0A498MA61					sypl2	A0A498NS18		vrk1	A0A498LMR7		cast	A0A498LJR2		fam213a	A0A498MWJ6		macf1	A0A498LAN4		xrcc5	A0A498MAX0		gcdh	A0A498NU21
adck4	A0A498MED0					mri1	A0A498N520		BOLA2B	A0A498NTF7		PNPT1	A0A498L5N9		aco1	A0A498MTB1					nccrp1	A0A498LE53		faf2	A0A498ND52		itih3	A0A498MUL6		cops8	A0A498NEP6		tjp2	A0A498MYC9		apeh	A0A498MLK0		anxa3	A0A498MM94
txn2	A0A498MEF9					glrx3	A0A498LFT5		arl9	A0A498N6B9		SUOX	A0A498LV72		serpine2	A0A498MRK0					tpk1	A0A498L766		hexdc	A0A498LRC0		serpind1	A0A498NI15		neto1	A0A498LP79		usp9x	A0A498N7E8		dync1i2	A0A498LP67		galm	A0A498N834
hsf4	A0A498MEH9					ptprz1	A0A498MFZ9		galns	A0A498ML35		serpina10	A0A498MSI0		mrps18a	A0A498N572					ogn	A0A498N7R3		galk2	A0A498N6I1		dpp4	A0A498NJ89		acp1	A0A498LQP8		nup153	A0A498MWU9		parp2	A0A498NNL7		aimp1	A0A498LLM0
exoc4	A0A498MEI4					nid2	A0A498LTT6		rpa3	A0A498LES4		pcyox1	A0A498MM46		NCBP1	A0A498N4T4					eci1	A0A498MX93		blmh	A0A498LH75		fbln1	A0A498NRZ2		tfg	A0A498NEM1		clint1	A0A498LHC0		acss3	A0A498M0S1		snrnp40	A0A498MZK9
exosc7	A0A498MEI7					sorbs2	A0A498MUC4		hps4	A0A498LCF8		NAPSA	A0A498NLQ0		EFTUD1	A0A498NA71					PPP1R12B	A0A498NGL8		sirt2	A0A498NP11		sorbs3	A0A498MGG0		cstf1	A0A498MJ92		UACA	A0A498MMN3		xrcc6	A0A498LGY5		cnn3	A0A498N571
MAP1A	A0A498MEJ1					slc6a17	A0A498L8G0		mtdh	A0A498MZF4		snrnp40	A0A498MZK9		slc25a46	A0A498MCI8					vasp	A0A498MD67		ccbl2	A0A498M4C1		btd	A0A498LYJ5		UBA4	A0A498NAG4		rnf20	A0A498LLK7		lbr	A0A498LKS9		cnn1	A0A498LNC0
ITIH4	A0A498MTS8					RUFY1	A0A498NEZ1		ARPIN	A0A498MAU7		pdlim4	A0A498N9T2		nhp2	A0A498LPL2					eif4e	A0A498LFK8		gcdh	A0A498NU21		dhcr24	A0A498LDP8		wdfy1	A0A498MRK7		DOCK2	A0A498N213		UBXN4	A0A498P3E8		dll3	A0A498LHZ4
itih3	A0A498MUL6					plxnb1	A0A498MZI6		psap	A0A498N4B3		cdv3	A0A498N7N0		optc	A0A498MSQ5					FTHL17	A0A498M9Z8		urod	A0A498LJC4		gstz1	A0A498LVZ9		pcyt1b	A0A498MYA5		dock3	A0A498MFT2		shbg	A0A498LBR0		sgpl1	A0A498MUV0
wnk2	A0A498N2P5					vps16	A0A498NNY5		wdr18	A0A498NJJ6		oxr1	A0A498MKH8		ddi2	A0A498L5Z7					RAB31	A0A498LEZ9		eif3h	A0A498N383		bcap29	A0A498NZ72		bckdk	A0A498MP23		DOCK1	A0A498MJH4		faf2	A0A498ND52		dnajc9	A0A498NT54
MAP1B	A0A498N3F6					GAN	A0A498MVI4		fstl1	A0A498MGU5		TOM1	A0A498NL76		rexo2	A0A498NLD2					psmb4	A0A498NBJ4		galm	A0A498N834		marcksl1	A0A498LYF0		ciao1	A0A498LL84		ubtf	A0A498LZ18		pip4k2a	A0A498L6U4		pgp	A0A498L837
mtif3	A0A498MEJ9					hapln1	A0A498NQ29		PPA2	A0A498NX57		mff	A0A498MNZ0		surf1	A0A498LPK2					PDCL3	A0A498MDM7		C12orf10	A0A498NJE4		capza1	A0A498MN53		prkag1	A0A498LH41		afg3l2	A0A498MHN6		ubxn1	A0A498N3S1		atrnl1	A0A498LNI8
synm	A0A498MEK4					hapln3	A0A498MJW1		lrrc17	A0A498M9T9		ccr9	A0A498N962		nid1	A0A498LVN4					plch2	A0A498LWN1		aimp1	A0A498LLM0		apom	A0A498NSF4		dll3	A0A498LHZ4		strn3	A0A498MVV8		hexdc	A0A498LRC0		alkbh3	A0A498MD60
bcat1	A0A498MEK8					cacna2d1	A0A498NXN0		C11orf54	A0A498N1E7		sqstm1	A0A498MZY5		fah	A0A498NA62					ssbp1	A0A498MN52		cnn1	A0A498LNC0		ppm1f	A0A498LFN2		eif2b2	A0A498NKP3		nid1	A0A498LVN4		galk2	A0A498N6I1		tpd52	A0A498MLK3
cwf19l1	A0A498MEL6					wdr17	A0A498L8K6		tfam	A0A498N7L4		nudcd1	A0A498NC47		pgm5	A0A498MBC1					dpf1	A0A498M4Q4		cryz	A0A498P4F6		plbd1	A0A498M7Q3		dph5	A0A498MGT9		nipbl	A0A498MPN9		pip4k2c	A0A498LNL7		enoph1	A0A498LUE7
gdi1	A0A498LTB6					REEP1	A0A498LTD4		vapb	A0A498LN48		dak	A0A498MJD4		serpind1	A0A498NI15					hexdc	A0A498LRC0		sgpl1	A0A498MUV0		shbg	A0A498LBR0		DOC2B	A0A498N1C5		dync1li2	A0A498LWA9		blmh	A0A498LH75		magt1	A0A498N4G3
gdi2	A0A498MEQ4					PCYOX1L	A0A498LC68		sugt1	A0A498NED4		iba57	A0A498NDW3		fbln1	A0A498NRZ2					trove2	A0A498N4K4		mrto4	A0A498LVI3		sh3glb1	A0A498M723		alg5	A0A498MJW6		elmo1	A0A498N309		sirt2	A0A498NP11		rad17	A0A498NJL7
kiaa0513	A0A498MEQ5					trim2	A0A498LLZ0		sypl2	A0A498NS18		fxr1	A0A498P5C7		gstp1	A0A498NEU1					klhl15	A0A498LJN2		FRG1	A0A498MUB4		mgat4d	A0A498LVP1		hmgcl	A0A498NCN4		fam129a	A0A498MC09		ccbl2	A0A498M4C1		fkbp3	A0A498NTU1
cyp1a	A0A498MEQ7					hdac4	A0A498MNZ1		kdsr	A0A498N094		hspa13	A0A498LQ86		ephx2	A0A498NP55					NHLRC3	A0A498MCR3		tpd52	A0A498MLK3		nhlrc2	A0A498LPK8		hnrnpa3	A0A498LJ97		SCYL2	A0A498L9W6		anxa3	A0A498MM94		psmc3ip	A0A498L5E6
stk38	A0A498LP65					emc2	A0A498LFR4		aip	A0A498L7Y3		CPN2	A0A498MDK0		nprl3	A0A498NFT9					ctsb	A0A498NV01		enoph1	A0A498LUE7		gnmt	A0A498LU93		nup35	A0A498NE60		tfrc	A0A498M1D0		eif3h	A0A498N383		abhd10	A0A498MFZ3
stk38l	A0A498MER8					COQ5	A0A498NGF1		cdv3	A0A498N7N0		c8a	A0A498M176		wnk2	A0A498N2P5					rpe	A0A498NB21		lactb2	A0A498NT66		WDR1	A0A498MPH1		nif3l1	A0A498N151		MAP3K15	A0A498M9V9		bcat1	A0A498MEK8		idi1	A0A498LYI2
grip1	A0A498MET0					sh3gl3	A0A498LZG2		SCO1	A0A498MKC8		glyr1	A0A498NI11		btd	A0A498LYJ5					rexo2	A0A498NLD2		WWC1	A0A498LU65		epcam	A0A498MSX6		eif2b1	A0A498MSF0		mad1l1	A0A498LDS3		aimp1	A0A498LLM0		fam213a	A0A498MWJ6
calu	A0A498MEU8					mff	A0A498MNZ0		MMP21	A0A498LKL1		col28a1	A0A498NQY3		lama4	A0A498M9X2					sri	A0A498LG84		lmo7	A0A498MEA4		agxt2	A0A498LLD3		dscr3	A0A498MHR7		mms19	A0A498N5Y0		mecr	A0A498LT82		lsm12	A0A498MWW0
rcn1	A0A498NFK2					pi4k2a	A0A498LLY9		c1qbp	A0A498NKL6		cd59	A0A498MK06		gstz1	A0A498LVZ9					C16orf13	A0A498MFH3		abhd10	A0A498MFZ3		ddah2	A0A498MD47		rpl7l1	A0A498M0I6		dab2	A0A498LQA2		hsd3b7	A0A498NQ52		tmed9	A0A498NTD8
gapvd1	A0A498MEX2					calcoco2	A0A498LCL9		crkl	A0A498N553		il2rb	A0A498NKR1		bcap29	A0A498NZ72					hspb1	A0A498NLH3		tango2	A0A498MRZ3		blvra	A0A498N0E6		C2orf47	A0A498N4M5		pmpca	A0A498N1I4		dll3	A0A498LHZ4		cops8	A0A498NEP6
pisd	A0A498MEX3					sh3kbp1	A0A498MIB9		gipc1	A0A498MKT8		sdpr	A0A498N552		rcn3	A0A498NP50					ahsa1	A0A498LWW5		hddc3	A0A498MHR4		nccrp1	A0A498LE53		hdhd1	A0A498L319		acox3	A0A498NTH1		sgpl1	A0A498MUV0		pbdc1	A0A498MSR1
plcxd3	A0A498MEY9					wdr13	A0A498MR07		DDAH1	A0A498M2T9		pltp	A0A498M4T0		pdlim2	A0A498MLE9					bag1	A0A498MKQ1		EMG1	A0A498NMY4		synm	A0A498MFT6		psmb9	A0A498M262		ATG7	A0A498NJK5		lactb2	A0A498NT66		tsnaxip1	A0A498MFR0
rlbp1	A0A498MEZ4					smurf2	A0A498MEG6		znf451	A0A498MZ16		pkp1	A0A498L5R1		apom	A0A498NSF4					atp5d	A0A498MGL5		fam213a	A0A498MVQ4		reep5	A0A498M3F5		gpx4	A0A498MGM1		tgm1	A0A498LCV7		pgp	A0A498L837		tfg	A0A498NEM1
ndufb10	A0A498MEZ8					tenm3	A0A498L8J7		copz2	A0A498MY19		decr2	A0A498MPU1		cast	A0A498LJR2					dnph1	A0A498MLG0		lsm12	A0A498MWW0		lxn	A0A498M4K7		pfdn4	A0A498M237		dennd4c	A0A498MAQ4		rad17	A0A498NJL7		hat1	A0A498LJB0
prmt3	A0A498MEZ9					TENM2	A0A498NU66		cnpy4	A0A498MQ27		aspn	A0A498LAH9		ddah2	A0A498MD47					ndufb8	A0A498LKL7		lzic	A0A498P0C7		smpdl3b	A0A498LTC9		dnajc12	A0A498LNK7		d2hgdh	A0A498NSH1		fkbp3	A0A498NTU1		ap5z1	A0A498M9Z9
rnf20	A0A498LLK7					tenm4	A0A498N159		ptp4a2	A0A498MVK7		syk	A0A498LUL2		sh3glb1	A0A498M723					asrgl1	A0A498NFQ9		WNK4	A0A498MRM3		aimp2	A0A498NC19		fam136a	A0A498MJT0		fnta	A0A498NBL9		WWC1	A0A498LU65		amt	A0A498MMV2
snrnp200	A0A498MF00					SNTB2	A0A498NEB7		glipr2	A0A498NDJ7		cyfip1	A0A498LRL9		bpnt1	A0A498N514					rpl28	A0A498NGN3		acp1	A0A498LQP8		cpvl	A0A498NPD7		CUL7	A0A498MUU2		dnajc7	A0A498M6L9		lmo7	A0A498MEA4		pcyt1b	A0A498MYA5
fahd1	A0A498MF21					smek1	A0A498MAG1		ppih	A0A498M607		vps52	A0A498MJ67		itih3	A0A498MUL6					ndufb7	A0A498MI42		tfg	A0A498NEM1		DDAH1	A0A498M2T9		habp2	A0A498NEC0		nup43	A0A498MI74		abhd10	A0A498MFZ3		mri1	A0A498N520
gas7	A0A498NHR7					pacsin1	A0A498L9V5		acot13	A0A498MLJ8		trappc12	A0A498N045		gnmt	A0A498LU93					wdr47	A0A498LAM7		rbm42	A0A498L582		AHSG	A0A498N4I5		nup88	A0A498NMR7		nadk2	A0A498NC90		idi1	A0A498LYI2		urod	A0A498LJC4
trip12	A0A498MF43					arhgdia	A0A498LI33		crtap	A0A498N352		tmlhe	A0A498NC20		WDR1	A0A498MPH1					pfdn4	A0A498M237		ap5z1	A0A498M9Z9		fuca2	A0A498NQ43		rpa1	A0A498LHR7		gpt2	A0A498MJ55		tango2	A0A498NJN4		acaa1	A0A498LP08
fhl5	A0A498LMN9					micu1	A0A498MZZ5		gpa33	A0A498MBQ2		mvk	A0A498NGL3		nhlrc2	A0A498LPK8					MRPS36	A0A498NS37		NAPSA	A0A498NLQ0		ambp	A0A498MNZ5		ATG7	A0A498NJK5		LMTK3	A0A498NJ80		arl9	A0A498N6B9		ciao1	A0A498LL84
fhl3	A0A498NIJ0					sult4a1	A0A498P5Q8		nt5c3b	A0A498MC78		TBC1D24	A0A498L1B2		pycrl	A0A498NTF0					WIZ	A0A498NUR8		amt	A0A498MMV2		olfml3	A0A498ML14		eif2b4	A0A498M459		amacr	A0A498N563		bcl2l1	A0A498MVN6		chordc1	A0A498MYT1
ccdc120	A0A498MF95					mpp3	A0A498M6M5		comtd1	A0A498LQ30		lrsam1	A0A498LQ91		aimp2	A0A498NC19					cdh17	A0A498NEK9		pcyt1b	A0A498MYA5		lgals2	A0A498NLB5		snw1	A0A498NLB3		dnajb11	A0A498NEV1		bpgm	A0A498M3Y5		dph5	A0A498MGT9
araf	A0A498L271					ctsz	A0A498LKT3		hddc3	A0A498MHR4		mmrn2	A0A498NDX8		KIF25	A0A498MHB2					aox1	A0A498MB87		bckdk	A0A498MP23		gpx3	A0A498LWG8		tes	A0A498MJX4		zpr1	A0A498LUF5		BPHL	A0A498NTJ2		nup35	A0A498NE60
braf	A0A498MF96					kctd6	A0A498MPS9		psmd9	A0A498MQE7		galc	A0A498LP83		ambp	A0A498MNZ5					fbln1	A0A498NRZ2		ciao1	A0A498LL84		pbld	A0A498N6F0		narfl	A0A498MSV7		lrpap1	A0A498MJN9		psmd9	A0A498MQE7		alg5	A0A498MJW6
C10orf88	A0A498NT71					hsf4	A0A498MEH9		RASGRF1	A0A498MIZ1		IL16	A0A498N0E1		c5	A0A498MMD9					ace	A0A498LUH0		chordc1	A0A498MYT1		nudt2	A0A498M1G4		stk38l	A0A498MER8		ttc38	A0A498MXZ7		fam213a	A0A498MWJ6		trmt61a	A0A498MSW6
CCDC50	A0A498MF99					apex1	A0A498MXE5		dynlt3	A0A498NPR6		b3galtl	A0A498MHB0		AHSG	A0A498N4I5					C12orf10	A0A498NJE4		SLC39A3	A0A498MYF6		mdk	A0A498M8K8		mmd2	A0A498MI25		HTRA2	A0A498MYC4		MTHFS	A0A498N9B9		nif3l1	A0A498N151
plgrkt	A0A498MFA2					scai	A0A498LQJ0		TPPP2	A0A498LIE2		xrn2	A0A498NK02		mgat4d	A0A498LVP1					fasn	A0A498LNV7		eif2b2	A0A498NKP3		macrod1	A0A498N1A7		pros1	A0A498MBF2		mtmr9	A0A498L1P6		lsm12	A0A498MWW0		exosc7	A0A498MEI7
tnpo3	A0A498MFC2					exoc6	A0A498NET1		ndufa11	A0A498NJS7		mep1b	A0A498M3B5		ndufa2	A0A498NC16					p3h1	A0A498MXX1		dph5	A0A498MGT9		ggt5	A0A498LK83		txndc9	A0A498NWS8		plbd1	A0A498M7Q3		lzic	A0A498P0C7		hnrnpa3	A0A498LJ97
ppp1r8	A0A498MFC8					exoc6b	A0A498MPW7		ddx49	A0A498NJ09		slc4a1	A0A498LX14		gpx3	A0A498LWG8					sh3kbp1	A0A498MIB9		hmgcl	A0A498NCN4		ndufa5	A0A498MSQ9		nup210	A0A498MU58		enoph1	A0A498LUE7		cops8	A0A498NEP6		gemin2	A0A498N3J3
mgarp	A0A498MFE9					polb	A0A498NHX9		NDUFC2	A0A498MXI2		myo7a	A0A498NUD1		pbld	A0A498N6F0					afap1l2	A0A498LPY6		hnrnpa3	A0A498LJ97		C4orf33	A0A498MI09		WDR44	A0A498LAC3		pofut1	A0A498M0R9		atp5d	A0A498MGL5		eif2b1	A0A498MSF0
crmp1	A0A498MFF9					fam63a	A0A498M7K8		ATP8	H9C4W8		NMI	A0A498P4P7		cmpk1	A0A498N071					kng1	A0A498MUT8		nup35	A0A498NE60		glrx	A0A498LZX5		ktn1	A0A498LSE6		cxadr	A0A498LN15		acp1	A0A498LQP8		pycrl	A0A498NTF0
tom1	A0A498MFG1					leprel2	A0A498N527		fahd1	A0A498MF21		trim25	A0A498M062		macrod1	A0A498N1A7					ARPIN	A0A498MAU7		wars2	A0A498N8Q8		npc2	A0A498LSC6		ankfy1	A0A498LYZ7		ppt1	A0A498MZL6		tsnaxip1	A0A498MFR0		rpl7l1	A0A498M0I6
[truncated: 2,258 more rows]

## Sheet: Eye_PA
		PA data							STRING Input										Input genes details from STRING
[truncated: 21 more rows]

## Sheet: Liver_PA
		dre00860 Porphyrin and chlorophyll metabolism - Danio rerio (zebrafish) (8)										STRING Input									Input list description on STRING
[truncated: 42 more rows]

[truncated: 21 more sheets: Heart_PA, Muscle_PA, Heart KEGG Pathway, Liver KEGG Pathway, Eye KEGG Pathway, Muscle KEGG Pathway, AB KEGG Pathway, Brain KEGG Pathway, Embryo KEGG Pathway, Female Gonad KEGG Pathway, Fin KEGG Pathway, GB KEGG Pathway, Gill KEGG Pathway, Gut KEGG Pathway, Kidney KEGG Pathway, Male Gonad KEGG Pathway, Plasma KEGG Pathway, Scale KEGG Pathway, Skin KEGG Pathway, Spinal Cord KEGG Pathway …]
