# Supplementary material for: The Proteome Map and PeptideAtlas of a widely cultivated tropical water fish Labeo rohita: A resource for the Aquaculture Community
Source: Research Square preprint supplement (doi:10.21203/rs.3.rs-397364/v1), 2021-04-12
Supplement: Supplementary file 7 [file d11fe442bc0f43e473def7f1.xlsx]

## Sheet: Description_of_Worksheets
			Worksheet	Description
			Gonads_PA_sheet	Canonical protein list for male gonad (MG) and female gonad (FG) and combined proteins identified from gonads of which 2933 proteins were having no missing value which were taken for expression analysis in gonads.
			Input_Ttl_Gonad_PA_2933	Data for Supplementary Figure S3 (i.e expression of total 2933 canonical proteins of gonads).
			Input_Shared_Gonad_PA_1511	Data for Figure 2c (i.e expression of 1511 canonical proteins shared between gonads).

## Sheet: Gonads_PA_sheet
	FG	MG		Total_Gonad_PA		3771 common elements in "Ttl_exp_5702" and "PA_Gonads":		2933_Gonads_Miss_Val_Removed	Mix NCBI up	Female gonad	Male gonad	Blanks						3771 common elements in "List 1" and "List 2":
	A0A498NCX8	A0A498MAL1		A0A498NCX8		A0A498NCX8		RXN02385.1	A0A498LAL8		21.0698	1						A0A498NCX8
	A0A498N1F4	A0A498NCX8		A0A498N1F4		A0A498N1F4		RXN02736.1	A0A498L7E0	28.4125		1						A0A498N1F4
	A0A498NBD6	A0A498N1F4		A0A498NBD6		A0A498NBD6		RXN02856.1	A0A498L7Q0	23.6156		1						A0A498NBD6
	A0A498LA61	A0A498MP80		A0A498LA61		A0A498LA61		RXN03258.1	A0A498L582		25.2047	1						A0A498LA61
	A0A498LBG8	A0A498NBD6		A0A498LBG8		A0A498LBG8		RXN03533.1	A0A498L851		29.3477	1						A0A498LBG8
	A0A498LMQ3	A0A498LA61		A0A498LMQ3		A0A498LMQ3		RXN03574.1	A0A498LAS3		25.6222	1						A0A498LMQ3
	A0A498NIH7	A0A498LBG8		A0A498NIH7		A0A498NIH7		RXN03602.1	A0A498NAG4		23.9391	1						A0A498NIH7
	A0A498LKM6	A0A498LMQ3		A0A498LKM6		A0A498LKM6		RXN04353.1	A0A498LAH0		25.2924	1						A0A498LKM6
	A0A498NRJ2	A0A498MV49		A0A498NRJ2		A0A498NRJ2		RXN04556.1	A0A498LCA5		26.6546	1						A0A498NRJ2
	A0A498MG59	A0A498NIH7		A0A498MG59		A0A498MG59		RXN04822.1	A0A498MUQ9		22.9628	1						A0A498MG59
	A0A498NA67	A0A498MEV5		A0A498NA67		A0A498NA67		RXN04995.1	A0A498LHR9	24.81		1						A0A498NA67
	A0A498MH55	A0A498LKM6		A0A498MH55		A0A498MH55		RXN05080.1	A0A498L9N6		27.3647	1						A0A498MH55
	A0A498N052	A0A498NRJ2		A0A498N052		A0A498N052		RXN05114.1	A0A498LEW1		25.794	1						A0A498N052
	A0A498NCF3	A0A498NF52		A0A498NCF3		A0A498NCF3		RXN05312.1	A0A498MFV2	22.4554		1						A0A498NCF3
	A0A498N7Y8	A0A498M6T7		A0A498N7Y8		A0A498N7Y8		RXN05709.1	A0A498LBM4		24.5065	1						A0A498N7Y8
	A0A498M6I9	A0A498MG59		A0A498M6I9		A0A498M6I9		RXN05713.1	A0A498LE50	24.7618		1						A0A498M6I9
	A0A498N1X7	A0A498N052		A0A498N1X7		A0A498N1X7		RXN05724.1	A0A498LGC2		22.1144	1						A0A498N1X7
	A0A498MNR6	A0A498NA67		A0A498MNR6		A0A498MNR6		RXN05734.1	A0A498LGD0		24.7785	1						A0A498MNR6
	A0A498MW63	A0A498MH55		A0A498MW63		A0A498MW63		RXN06564.1	A0A498ML00		24.8538	1						A0A498MW63
	A0A498M1C7	A0A498NCF3		A0A498M1C7		A0A498M1C7		RXN06747.1	A0A498LMG9	32.6531		1						A0A498M1C7
	A0A498N2W1	A0A498LCC7		A0A498N2W1		A0A498N2W1		RXN06808.1	A0A498LEV7	27.9329		1						A0A498N2W1
	A0A498P452	A0A498MNR6		A0A498P452		A0A498P452		RXN06915.1	A0A498LNH2	25.1672		1						A0A498P452
	A0A498MYF0	A0A498N7Y8		A0A498MYF0		A0A498MYF0		RXN07024.1	A0A498LK22		24.438	1						A0A498MYF0
	A0A498P3L6	A0A498M6I9		A0A498P3L6		A0A498P3L6		RXN07107.1	A0A498LNI4		26.6325	1						A0A498P3L6
	A0A498NCC7	A0A498N1X7		A0A498NCC7		A0A498NCC7		RXN07219.1	A0A498M870		27.056	1						A0A498NCC7
	A0A498MUY3	A0A498M1C7		A0A498MUY3		A0A498MUY3		RXN07540.1	A0A498LH85		20.1933	1						A0A498MUY3
	A0A498N5E2	A0A498N2W1		A0A498N5E2		A0A498N5E2		RXN07629.1	A0A498LH44		22.0017	1						A0A498N5E2
	A0A498NJQ6	A0A498P452		A0A498NJQ6		A0A498NJQ6		RXN07669.1	A0A498LH83	20.6729		1						A0A498NJQ6
	A0A498LUI2	A0A498MYF0		A0A498LUI2		A0A498LUI2		RXN07997.1	A0A498LR98	24.8329		1						A0A498LUI2
	A0A498L301	A0A498P3L6		A0A498L301		A0A498L301		RXN08318.1	A0A498LJ09	25.4581		1						A0A498L301
	A0A498NFA7	A0A498N5E2		A0A498NFA7		A0A498NFA7		RXN08463.1	A0A498LLP1	32.7229		1						A0A498NFA7
	A0A498NRR2	A0A498MUY3		A0A498NRR2		A0A498NRR2		RXN08468.1	A0A498LJD5	28.4289		1						A0A498NRR2
	A0A498NM47	A0A498NCC7		A0A498NM47		A0A498NM47		RXN08469.1	A0A498LJD4	32.3412		1						A0A498NM47
	A0A498MPP7	A0A498NJQ6		A0A498MPP7		A0A498MPP7		RXN08478.1	A0A498LJE3		25.33	1						A0A498MPP7
	A0A498MFP7	A0A498LUI2		A0A498MFP7		A0A498MFP7		RXN08498.1	A0A498LJG1		26.9356	1						A0A498MFP7
	A0A498MGL9	A0A498NM47		A0A498MGL9		A0A498MGL9		RXN08631.1	A0A498NA43		27.2245	1						A0A498MGL9
	A0A498LBQ1	A0A498L301		A0A498LBQ1		A0A498LBQ1		RXN08733.1	A0A498LNR8		27.3176	1						A0A498LBQ1
	A0A498LLW9	A0A498NFA7		A0A498LLW9		A0A498LLW9		RXN08910.1	A0A498LL07	24.2517		1						A0A498LLW9
	A0A498N2F6	A0A498NRR2		A0A498N2F6		A0A498N2F6		RXN08927.1	A0A498LU33		26.7444	1						A0A498N2F6
	A0A498MF00	A0A498MPP7		A0A498MF00		A0A498MF00		RXN09074.1	A0A498LQS9		23.8002	1						A0A498MF00
	A0A498M831	A0A498MFP7		A0A498M831		A0A498M831		RXN09139.1	A0A498LL64	31.956		1						A0A498M831
	A0A498MV04	A0A498MGL9		A0A498MV04		A0A498NRR8		RXN09187.1	A0A498LUW6	22.0892		1						A0A498NRR8
	A0A498NRR8	A0A498LBQ1		A0A498NRR8		A0A498N016		RXN09189.1	A0A498LLA7		25.3914	1						A0A498N016
	A0A498N016	A0A498LLW9		A0A498N016		A0A498M4E4		RXN09430.1	A0A498LMQ1		25.7199	1						A0A498M4E4
	A0A498M4E4	A0A498N2F6		A0A498M4E4		A0A498MKR4		RXN09507.1	A0A498M4Z4		28.5527	1						A0A498MKR4
	A0A498MKR4	A0A498M831		A0A498MKR4		A0A498LQX9		RXN09585.1	A0A0G3F7Z2	23.5984		1						A0A498LQX9
	A0A498LQX9	A0A498NP84		A0A498LQX9		A0A498LRI3		RXN09663.1	A0A498LPU9	23.5762		1						A0A498LRI3
	A0A498LRI3	A0A498MV04		A0A498LRI3		A0A498NFA9		RXN10096.1	A0A498LSL9	22.6379		1						A0A498NFA9
	A0A498NFA9	A0A498NRR8		A0A498NFA9		A0A498N6X4		RXN10245.1	A0A498LXX1		26.7589	1						A0A498N6X4
	A0A498N6X4	A0A498M4E4		A0A498N6X4		A0A498LAI7		RXN10432.1	A0A498LRV0		23.3922	1						A0A498LAI7
	A0A498LAI7	A0A498MKR4		A0A498LAI7		A0A498P024		RXN10474.1	A0A498LUK4		23.5773	1						A0A498P024
	A0A498P024	A0A498LRI3		A0A498P024		A0A498LW51		RXN10637.1	A0A498LZT4	23.1967		1						A0A498LW51
	A0A498LW51	A0A498LAI7		A0A498LW51		A0A498LZ02		RXN10654.1	A0A498LV29	22.5772		1						A0A498LZ02
	A0A498LZ02	A0A498NFA9		A0A498LZ02		A0A498ME64		RXN10955.1	A0A498LZX6		23.828	1						A0A498ME64
	A0A498ME64	A0A498N6X4		A0A498ME64		A0A498MK55		RXN10970.1	A0A498LS24	24.3318		1						A0A498MK55
	A0A498MK55	A0A498LW51		A0A498MK55		A0A498MQJ6		RXN11008.1	A0A498MG09		26.1193	1						A0A498MQJ6
	A0A498MQJ6	A0A498P024		A0A498MQJ6		A0A498L7X2		RXN11024.1	A0A498LVZ3		24.3471	1						A0A498L7X2
	A0A498L7X2	A0A498LZ02		A0A498L7X2		A0A498MYS8		RXN11029.1	A0A498LRJ2		22.0729	1						A0A498MYS8
	A0A498MYS8	A0A498MK55		A0A498MYS8		A0A498LAX2		RXN11839.1	A0A498LTT0		20.5737	1						A0A498LAX2
	A0A498LAX2	A0A498MQJ6		A0A498LAX2		A0A498LPH1		RXN11994.1	A0A498LYP6		26.3554	1						A0A498LPH1
	A0A498LPH1	A0A498ME64		A0A498LPH1		A0A498LI11		RXN12090.1	A0A498LVB3		24.1366	1						A0A498LI11
	A0A498LI11	A0A498L7X2		A0A498LI11		A0A498LTI4		RXN12272.1	A0A498LXV8	30.254		1						A0A498LTI4
	A0A498LTI4	A0A498LAX2		A0A498LTI4		A0A498MY97		RXN12608.1	A0A498LVU3		23.7658	1						A0A498MY97
	A0A498MY97	A0A498LTI4		A0A498MY97		A0A498MJ13		RXN12649.1	A0A498P603		22.8155	1						A0A498MJ13
	A0A498MJ13	A0A498LI11		A0A498MJ13		A0A498LII5		RXN12988.1	A0A498LWR7	23.8899		1						A0A498LII5
	A0A498LII5	A0A498LII5		A0A498LII5		A0A498LW71		RXN13292.1	A0A498M156	25.119		1						A0A498LW71
	A0A498LW71	A0A498LW71		A0A498LW71		A0A498M4T4		RXN13542.1	A0A498M1Y9	24.8571		1						A0A498M4T4
	A0A498M4T4	A0A498MML7		A0A498M4T4		A0A498MML7		RXN13569.1	A0A498LYF2		25.9464	1						A0A498MML7
	A0A498MML7	A0A498M4T4		A0A498MML7		A0A498NBU2		RXN13966.1	A0A498M3B7	28.3164		1						A0A498NBU2
	A0A498NBU2	A0A498NBU2		A0A498NBU2		A0A498MIT6		RXN14085.1	A0A498M981		22.3255	1						A0A498MIT6
	A0A498MIT6	A0A498M147		A0A498MIT6		A0A498LPR4		RXN14132.1	A0A498M3V9		22.5857	1						A0A498LPR4
	A0A498LPR4	A0A498MIT6		A0A498LPR4		A0A498MYE6		RXN14206.1	A0A498M411		23.0496	1						A0A498MYE6
	A0A498MYE6	A0A498LWG6		A0A498MYE6		A0A498MT56		RXN14222.1	A0A498NX65		23.8443	1						A0A498MT56
	A0A498MT56	A0A498LPR4		A0A498MT56		A0A498NK81		RXN14249.1	A0A498M090	22.3789		1						A0A498NK81
	A0A498NK81	A0A498NK81		A0A498NK81		A0A498MUQ8		RXN14363.1	A0A498M3D5	23.517		1						A0A498MUQ8
	A0A498MUQ8	A0A498MT56		A0A498MUQ8		A0A498MQQ6		RXN14558.1	A0A498M174	23.3147		1						A0A498MQQ6
	A0A498MQQ6	A0A498MUQ8		A0A498MQQ6		A0A498N571		RXN14814.1	A0A498M6I1		24.509	1						A0A498N571
	A0A498N571	A0A498LB05		A0A498N571		A0A498LB05		RXN14818.1	A0A498M1Y5	24.0407		1						A0A498LB05
	A0A498LB05	A0A498N0H7		A0A498LB05		A0A498N0H7		RXN14883.1	A0A498M4T4		28.0305	1						A0A498N0H7
	A0A498N0H7	A0A498LR99		A0A498N0H7		A0A498LR99		RXN14905.1	A0A498MBK5		22.2667	1						A0A498LR99
	A0A498LR99	A0A498MJJ2		A0A498LR99		A0A498L5N9		RXN14914.1	A0A498LJR5	23.6099		1						A0A498L5N9
	A0A498L5N9	A0A498NDE3		A0A498L5N9		A0A498NDE3		RXN15229.1	A0A498M6R4		21.228	1						A0A498NDE3
	A0A498NDE3	A0A498NBD8		A0A498NDE3		A0A498N4V8		RXN15365.1	A0A498MCY1		25.2287	1						A0A498N4V8
	A0A498N4V8	A0A498M7V0		A0A498N4V8		A0A498NBD8		RXN15383.1	A0A498M653		25.4274	1						A0A498NBD8
	A0A498NBD8	A0A498NMU3		A0A498NBD8		A0A498M7V0		RXN15439.1	A0A498M3J3		24.555	1						A0A498M7V0
	A0A498M7V0	A0A498MDH6		A0A498M7V0		A0A498M0I0		RXN15915.1	A0A498MEJ9	24.4586		1						A0A498M0I0
	A0A498M0I0	A0A498M0I0		A0A498M0I0		A0A498M5D4		RXN15919.1	A0A498M4X3		24.3525	1						A0A498M5D4
	A0A498M5D4	A0A498M5D4		A0A498M5D4		A0A498LPS4		RXN16821.1	A0A498M832		22.5873	1						A0A498LPS4
	A0A498LPS4	A0A498LPS4		A0A498LPS4		A0A498N7G4		RXN16906.1	A0A498MCR5		22.827	1						A0A498N7G4
	A0A498N7G4	A0A498N7G4		A0A498N7G4		A0A498MA51		RXN16920.1	A0A498M922		24.6825	1						A0A498MA51
	A0A498MA51	A0A498MA51		A0A498MA51		A0A498NF52		RXN16984.1	A0A498MCF3	28.4568		1						A0A498NF52
	A0A498NF52	A0A498M4D0		A0A498NF52		A0A498MDK5		RXN17201.1	A0A498M8Y2	24.2639		1						A0A498MDK5
	A0A498MDK5	A0A498MDK5		A0A498MDK5		A0A498N5G6		RXN17345.1	A0A498MJ46		26.6006	1						A0A498N5G6
	A0A498N5G6	A0A498MJ18		A0A498N5G6		A0A498MJ18		RXN17528.1	A0A498M937	21.4317		1						A0A498MJ18
	A0A498MJ18	A0A498LVS6		A0A498MJ18		A0A498M3J5		RXN17546.1	A0A498MEX3	24.7874		1						A0A498M3J5
	A0A498M3J5	A0A498MSX4		A0A498M3J5		A0A498MNH2		RXN17568.1	A0A498M970		31.196	1						A0A498MNH2
	A0A498MNH2	A0A498M3J5		A0A498MNH2		A0A498LJQ6		RXN17592.1	A0A498LHD2		29.0115	1						A0A498LJQ6
	A0A498LJQ6	A0A498MNH2		A0A498LJQ6		A0A498NQD7		RXN17772.1	A0A498MIW0		24.2411	1						A0A498NQD7
	A0A498NQD7	A0A498LJQ6		A0A498NQD7		A0A498L9A3		RXN17933.1	A0A498MDM0	22.0418		1						A0A498L9A3
	A0A498L9A3	A0A498MPZ9		A0A498L9A3		A0A498LXY4		RXN18031.1	A0A498MAX7	25.4472		1						A0A498LXY4
	A0A498LXY4	A0A498NQD7		A0A498LXY4		A0A498L7T5		RXN18053.1	A0A498ME33		22.3214	1						A0A498L7T5
	A0A498L7T5	A0A498L9A3		A0A498L7T5		A0A498MXB9		RXN18054.1	A0A498MFB7		24.593	1						A0A498MXB9
	A0A498MXB9	A0A498LXY4		A0A498MXB9		A0A498N915		RXN18227.1	A0A498MMI5		27.3351	1						A0A498N915
	A0A498N915	A0A498L7T5		A0A498N915		A0A498MHZ7		RXN18315.1	A0A498MMD0		23.1391	1						A0A498MHZ7
	A0A498MHZ7	A0A498MXB9		A0A498MHZ7		A0A498LN13		RXN18346.1	A0A498L5E6		24.0299	1						A0A498LN13
	A0A498LN13	A0A498MHZ7		A0A498LN13		A0A498MM59		RXN18729.1	A0A498MCA5		22.8258	1						A0A498MM59
	A0A498MM59	A0A498N915		A0A498MM59		A0A498M0I3		RXN18918.1	A0A498MCP3		24.5309	1						A0A498M0I3
	A0A498M0I3	A0A498LN13		A0A498M0I3		A0A498MM54		RXN19090.1	A0A498MG22		24.9943	1						A0A498MM54
	A0A498MM54	A0A498M0I3		A0A498MM54		A0A498MPF1		RXN19154.1	A0A498MIG5	35.3089		1						A0A498MPF1
	A0A498MPF1	A0A498MM54		A0A498MPF1		A0A498M321		RXN19467.1	A0A498MR48	25.9417		1						A0A498M321
	A0A498M321	A0A498MPF1		A0A498M321		A0A498NJI2		RXN19487.1	A0A498MR68		21.4592	1						A0A498NJI2
	A0A498NJI2	A0A498NJI2		A0A498NJI2		A0A498MJ03		RXN19881.1	A0A498MFP5		23.3628	1						A0A498MJ03
	A0A498MJ03	A0A498MJ03		A0A498MJ03		A0A498NLN5		RXN19996.1	A0A498MMT7	22.7004		1						A0A498NLN5
	A0A498NLN5	A0A498NBJ7		A0A498NLN5		A0A498MHV0		RXN20257.1	A0A498MTM1		25.0409	1						A0A498MHV0
	A0A498MHV0	A0A498L4F1		A0A498MHV0		A0A498MTB3		RXN20311.1	A0A498MGU0	25.2454		1						A0A498MTB3
	A0A498MTB3	A0A498MK73		A0A498MTB3		A0A498N8K0		RXN20316.1	A0A498MNS9	23.98		1						A0A498N8K0
	A0A498N8K0	A0A498N7N1		A0A498N8K0		A0A498NIK2		RXN20436.1	A0A498MP71		24.1665	1						A0A498NIK2
	A0A498NIK2	A0A498MPR5		A0A498NIK2		A0A498LGL1		RXN20490.1	A0A498MJV5		26.8836	1						A0A498LGL1
	A0A498LGL1	A0A498NHS3		A0A498LGL1		A0A498NAD9		RXN20507.1	A0A498MUH1		25.6201	1						A0A498NAD9
	A0A498NAD9	A0A498MHV0		A0A498NAD9		A0A498LJD8		RXN20686.1	A0A498MQ24		19.7759	1						A0A498LJD8
	A0A498LJD8	A0A498MTB3		A0A498LJD8		A0A498L8K0		RXN20696.1	A0A498MQ31		23.4733	1						A0A498L8K0
	A0A498L8K0	A0A498NAD9		A0A498L8K0		A0A498N9E0		RXN20706.1	A0A498MQ34		24.719	1						A0A498N9E0
	A0A498N9E0	A0A498LGL1		A0A498N9E0		A0A498MNM0		RXN20786.1	A0A498MQD4	24.5149		1						A0A498MNM0
	A0A498MNM0	A0A498NIK2		A0A498MNM0		A0A498ML43		RXN20975.1	A0A498MWF3		24.1956	1						A0A498ML43
	A0A498ML43	A0A498N8K0		A0A498ML43		A0A498MG46		RXN20992.1	A0A498MN12	21.8623		1						A0A498MG46
	A0A498MG46	A0A498LJD8		A0A498MG46		A0A498N9P4		RXN21135.1	A0A498MWW0		24.3403	1						A0A498N9P4
	A0A498N9P4	A0A498LI98		A0A498N9P4		A0A498MUC6		RXN21169.1	A0A498MIM7		28.0679	1						A0A498MUC6
	A0A498MUC6	A0A498LQS7		A0A498MUC6		A0A498LFW3		RXN21346.1	A0A498MS76		22.1115	1						A0A498LFW3
	A0A498LFW3	A0A498L8K0		A0A498LFW3		A0A498M6P1		RXN21484.1	A0A498MQ42		25.6566	1						A0A498M6P1
	A0A498M6P1	A0A498N9E0		A0A498M6P1		A0A498N489		RXN21494.1	A0A498MQ49		27.8591	1						A0A498N489
	A0A498N489	A0A498MNM0		A0A498N489		A0A498N949		RXN21547.1	A0A498MY58	23.4969		1						A0A498N949
	A0A498N949	A0A498ML43		A0A498N949		A0A498LUH2		RXN21549.1	A0A498MJR3		23.1123	1						A0A498LUH2
	A0A498LUH2	A0A498MG46		A0A498LUH2		A0A498LX35		RXN21560.1	A0A498MMR2		29.3756	1						A0A498LX35
	A0A498LX35	A0A498MVY7		A0A498LX35		A0A498L4Z1		RXN21648.1	A0A498MJT8		19.5382	1						A0A498L4Z1
	A0A498L4Z1	A0A498NKR5		A0A498L4Z1		A0A498NGM2		RXN21665.1	A0A498MYD8		24.1977	1						A0A498NGM2
	A0A498NGM2	A0A498NQV2		A0A498NGM2		A0A498MCL6		RXN21751.1	A0A498ML42		22.4691	1						A0A498MCL6
	A0A498MCL6	A0A498N9P4		A0A498MCL6		A0A498LBD4		RXN21924.1	A0A498MRG4	23.5042		1						A0A498LBD4
	A0A498LBD4	A0A498MUC6		A0A498LBD4		A0A498LZA7		RXN22339.1	A0A498MLP7		28.386	1						A0A498LZA7
	A0A498LZA7	A0A498LFW3		A0A498LZA7		A0A498LQ97		RXN22468.1	A0A498MM34		26.7791	1						A0A498LQ97
	A0A498LQ97	A0A498M6P1		A0A498LQ97		A0A498M1S6		RXN22471.1	A0A498MNM9	21.4108		1						A0A498M1S6
	A0A498M1S6	A0A498N949		A0A498M1S6		A0A498P3D0		RXN22801.1	A0A498MPU5		21.8864	1						A0A498P3D0
	A0A498P3D0	A0A498LUH2		A0A498P3D0		A0A498NCP9		RXN22844.1	A0A498MTY0		26.6912	1						A0A498NCP9
	A0A498NCP9	A0A498N489		A0A498NCP9		A0A498N4E9		RXN22848.1	A0A498MN25		24.3677	1						A0A498N4E9
	A0A498N4E9	A0A498LX35		A0A498N4E9		A0A498LT86		RXN23046.1	A0A498MXS6	23.3725		1						A0A498LT86
	A0A498LT86	A0A498MF00		A0A498LT86		A0A498MVV7		RXN23087.1	A0A498N2W1		23.6127	1						A0A498MVV7
	A0A498MVV7	A0A498L4Z1		A0A498MVV7		A0A498NLU9		RXN23269.1	A0A498MP45		24.5549	1						A0A498NLU9
	A0A498NLU9	A0A498NGM2		A0A498NLU9		A0A498MHH0		RXN23283.1	A0A498MTY9		26.0836	1						A0A498MHH0
	A0A498MHH0	A0A498LBD4		A0A498MHH0		A0A498NNZ3		RXN23310.1	A0A498MS63		24.3062	1						A0A498NNZ3
	A0A498NNZ3	A0A498LZA7		A0A498NNZ3		A0A498MXJ4		RXN23515.1	A0A498N3T1		26.0236	1						A0A498MXJ4
	A0A498MXJ4	A0A498LQ97		A0A498MXJ4		A0A498LMH4		RXN23652.1	A0A498MVL1		26.3124	1						A0A498LMH4
	A0A498LMH4	A0A498M1S6		A0A498LMH4		A0A498N0L3		RXN23774.1	A0A498MWE0	21.6765		1						A0A498N0L3
	A0A498N0L3	A0A498P3D0		A0A498N0L3		A0A498NK57		RXN23789.1	A0A498MQE7		24.7594	1						A0A498NK57
	A0A498NK57	A0A498NCP9		A0A498NK57		A0A498MPS7		RXN23816.1	A0A498MZY5		27.0053	1						A0A498MPS7
	A0A498MPS7	A0A498N4E9		A0A498MPS7		A0A498LQB7		RXN23858.1	A0A498MQN2		23.8813	1						A0A498LQB7
	A0A498LQB7	A0A498LT86		A0A498LQB7		A0A498LMB7		RXN24074.1	A0A498MX61		27.9012	1						A0A498LMB7
	A0A498LMB7	A0A498MVV7		A0A498LMB7		A0A498N2H4		RXN24127.1	A0A498N663	24.7789		1						A0A498N2H4
	A0A498N2H4	A0A498NLU9		A0A498N2H4		A0A498NFP5		RXN24448.1	A0A498MS51		24.561	1						A0A498NFP5
	A0A498NFP5	A0A498MHH0		A0A498NFP5		A0A498N236		RXN24681.1	A0A498MW77		24.1828	1						A0A498N236
	A0A498N236	A0A498NNZ3		A0A498N236		A0A498N286		RXN24789.1	A0A498MSU7	22.7502		1						A0A498N286
	A0A498N286	A0A498MXJ4		A0A498N286		A0A498L8U0		RXN24873.1	A0A498MYE5		26.2584	1						A0A498L8U0
	A0A498L8U0	A0A498N0L3		A0A498L8U0		A0A498LJJ3		RXN24923.1	A0A498MYI7		28.2796	1						A0A498LJJ3
	A0A498LJJ3	A0A498LMH4		A0A498LJJ3		A0A498L6D9		RXN25331.1	A0A498MXW0	22.3108		1						A0A498L6D9
	A0A498L6D9	A0A498LMB7		A0A498L6D9		A0A498NKE4		RXN25583.1	A0A498N0B2	26.5129		1						A0A498NKE4
	A0A498NKE4	A0A498LQB7		A0A498NKE4		A0A498NRU2		RXN25617.1	A0A498NA71		27.4101	1						A0A498NRU2
	A0A498NRU2	A0A498N2H4		A0A498NRU2		A0A498L202		RXN25818.1	A0A498MVF2	23.644		1						A0A498L202
	A0A498L202	A0A498NFP5		A0A498L202		A0A498LVT1		RXN25949.1	A0A498MV98		27.097	1						A0A498LVT1
	A0A498LVT1	A0A498N236		A0A498LVT1		A0A498NTE0		RXN26070.1	A0A498MZ22	31.494		1						A0A498NTE0
	A0A498NTE0	A0A498N286		A0A498NTE0		A0A498M340		RXN26071.1	A0A498MZW7	33.5788		1						A0A498M340
	A0A498M340	A0A498L8U0		A0A498M340		A0A498MNF8		RXN26094.1	A0A498LAY5		25.8121	1						A0A498MNF8
	A0A498MNF8	A0A498LJJ3		A0A498MNF8		A0A498M9V6		RXN26298.1	A0A498MWL3	23.0457		1						A0A498M9V6
	A0A498M9V6	A0A498L6D9		A0A498M9V6		A0A498LZ88		RXN26370.1	A0A498MZW2	21.1999		1						A0A498LZ88
	A0A498LZ88	A0A498NKE4		A0A498LZ88		A0A498MXX3		RXN26652.1	A0A498N4B0	22.2623		1						A0A498MXX3
	A0A498MXX3	A0A498NRU2		A0A498MXX3		A0A498NFB1		RXN26748.1	A0A498MXT9	28.1682		1						A0A498NFB1
	A0A498NFB1	A0A498L202		A0A498NFB1		A0A498LUN9		RXN26779.1	A0A498MXN1	26.8676		1						A0A498LUN9
	A0A498LUN9	A0A498LVT1		A0A498LUN9		A0A498N369		RXN26822.1	A0A498N4T9	24.6624		1						A0A498N369
	A0A498N369	A0A498NTE0		A0A498N369		A0A498L6Q9		RXN26842.1	A0A498N4V5		24.6726	1						A0A498L6Q9
	A0A498L6Q9	A0A498M340		A0A498L6Q9		A0A498MYK7		RXN27046.1	A0A498N8W5		25.8458	1						A0A498MYK7
	A0A498MYK7	A0A498MNF8		A0A498MYK7		A0A498MRT8		RXN27087.1	A0A498ND19		23.8056	1						A0A498MRT8
	A0A498MRT8	A0A498M9V6		A0A498MRT8		A0A498NS28		RXN27096.1	A0A498N900		24.1745	1						A0A498NS28
	A0A498NS28	A0A498LZ88		A0A498NS28		A0A498N8R8		RXN27115.1	A0A498NCE7	20.5345		1						A0A498N8R8
	A0A498N8R8	A0A498NFB1		A0A498N8R8		A0A498MG21		RXN27225.1	A0A498LIG4		26.061	1						A0A498MG21
	A0A498MG21	A0A498LUN9		A0A498MG21		A0A498LTB6		RXN27226.1	A0A498LIG2		21.0552	1						A0A498LTB6
	A0A498LTB6	A0A498L6Q9		A0A498LTB6		A0A498LWH6		RXN27273.1	A0A498LM70		21.3161	1						A0A498LWH6
	A0A498LWH6	A0A498NS28		A0A498LWH6		A0A498LJB6		RXN27334.1	A0A498N6M0	22.6477		1						A0A498LJB6
	A0A498LJB6	A0A498MRT8		A0A498LJB6		A0A498LTP4		RXN27336.1	A0A498N9I0	22.7247		1						A0A498LTP4
	A0A498LTP4	A0A498N8R8		A0A498LTP4		A0A498NJ41		RXN27347.1	A0A498NDE8		22.3727	1						A0A498NJ41
	A0A498NJ41	A0A498MG21		A0A498NJ41		A0A498LS50		RXN27383.1	A0A498N5A3	21.1862		1						A0A498LS50
	A0A498LS50	A0A498LTB6		A0A498LS50		A0A498MMG5		RXN27595.1	A0A498LFX2	25.2236		1						A0A498MMG5
	A0A498MMG5	A0A498NWT4		A0A498MMG5		A0A498LYJ4		RXN27705.1	A0A498NDB7		24.383	1						A0A498LYJ4
	A0A498LYJ4	A0A498LJB6		A0A498LYJ4		A0A498LMX1		RXN27794.1	A0A498N7X6	24.5771		1						A0A498LMX1
	A0A498LMX1	A0A498LTP4		A0A498LMX1		A0A498MUU6		RXN28056.1	A0A498NB41	21.4986		1						A0A498MUU6
	A0A498MUU6	A0A498NJ41		A0A498MUU6		A0A498MCT5		RXN28108.1	A0A498N1L7		24.6348	1						A0A498MCT5
	A0A498MCT5	A0A498N7R7		A0A498MCT5		A0A498NGB7		RXN28114.1	A0A498N8T3	22.8861		1						A0A498NGB7
	A0A498NGB7	A0A498MMG5		A0A498NGB7		A0A498LU94		RXN28368.1	A0A498N2H2		29.2732	1						A0A498LU94
	A0A498LU94	A0A498LYJ4		A0A498LU94		A0A498LBB3		RXN28477.1	A0A498NEH5	30.7036		1						A0A498LBB3
	A0A498LBB3	A0A498MZJ9		A0A498LBB3		A0A498M6G7		RXN28547.1	A0A498LID7	22.3114		1						A0A498M6G7
	A0A498M6G7	A0A498LMX1		A0A498M6G7		A0A498MZJ1		RXN28674.1	A0A498NAA2	24.8076		1						A0A498MZJ1
	A0A498MZJ1	A0A498MUU6		A0A498MZJ1		A0A498MSK2		RXN28793.1	A0A498N967		26.1222	1						A0A498MSK2
	A0A498MSK2	A0A498MCT5		A0A498MSK2		A0A498MW18		RXN28894.1	A0A498NAV9	32.2577		1						A0A498MW18
	A0A498MW18	A0A498LU94		A0A498MW18		A0A498L965		RXN29067.1	A0A498NEX3		25.8082	1						A0A498L965
	A0A498L965	A0A498NGB7		A0A498L965		A0A498NM51		RXN29164.1	A0A498NBG9		22.4552	1						A0A498NM51
	A0A498NM51	A0A498LBB3		A0A498NM51		A0A498N3B1		RXN29206.1	A0A498NDA5	25.3554		1						A0A498N3B1
	A0A498N3B1	A0A498M6G7		A0A498N3B1		A0A498LWS5		RXN29256.1	A0A498NDD2		25.7961	1						A0A498LWS5
	A0A498LWS5	A0A498MZJ1		A0A498LWS5		A0A498L2V9		RXN29271.1	A0A498N8N4		25.3575	1						A0A498L2V9
	A0A498L2V9	A0A498MSK2		A0A498L2V9		A0A498N2T4		RXN29522.1	A0A498NBW6	21.8406		1						A0A498N2T4
	A0A498N2T4	A0A498MW18		A0A498N2T4		A0A498MRL6		RXN29655.1	A0A498NF34		22.7309	1						A0A498MRL6
	A0A498MRL6	A0A498N4T4		A0A498MRL6		A0A498LZY5		RXN29776.1	A0A498NE09	25.8451		1						A0A498LZY5
	A0A498LZY5	A0A498NM51		A0A498LZY5		A0A498MK73		RXN29787.1	A0A498NFB0	22.8873		1						A0A498MK73
	A0A498MK73	A0A498L965		A0A498MK73		A0A498N7N1		RXN29850.1	A0A498N9X5		26.1635	1						A0A498N7N1
	A0A498N7N1	A0A498N3B1		A0A498N7N1		A0A498LFA4		RXN29949.1	A0A498N692	29.7239		1						A0A498LFA4
	A0A498LFA4	A0A498L2V9		A0A498LFA4		A0A498N201		RXN30321.1	A0A498NB20	23.8395		1						A0A498N201
	A0A498N201	A0A498N2T4		A0A498N201		A0A498M4Z7		RXN30358.1	A0A498N852		26.591	1						A0A498M4Z7
	A0A498M4Z7	A0A498MRL6		A0A498M4Z7		A0A498M7G9		RXN30372.1	A0A498NDA7		26.0066	1						A0A498M7G9
	A0A498M7G9	A0A498LZY5		A0A498M7G9		A0A498MSZ6		RXN30392.1	A0A498NDB9		23.9723	1						A0A498MSZ6
	A0A498MSZ6	A0A498LAK0		A0A498MSZ6		A0A498L933		RXN30582.1	A0A498NDL3	29.0254		1						A0A498L933
	A0A498L933	A0A498NBJ0		A0A498L933		A0A498LY45		RXN30964.1	A0A498L4W7		22.4484	1						A0A498LY45
	A0A498LY45	A0A498LFA4		A0A498LY45		A0A498M5K9		RXN31396.1	A0A498NHS6	25.0031		1						A0A498M5K9
	A0A498M5K9	A0A498N201		A0A498M5K9		A0A498LFM1		RXN31753.1	A0A498NIT1		24.6631	1						A0A498LFM1
	A0A498LFM1	A0A498M4Z7		A0A498LFM1		A0A498LHT6		RXN31923.1	A0A498NJ85		24.622	1						A0A498LHT6
	A0A498LHT6	A0A498M7G9		A0A498LHT6		A0A498LN76		RXN32165.1	A0A498N6F9	30.1128		1						A0A498LN76
	A0A498LN76	A0A498MSZ6		A0A498LN76		A0A498MY66		RXN32301.1	A0A498NKB9		23.5113	1						A0A498MY66
	A0A498MY66	A0A498LY45		A0A498MY66		A0A498NUZ0		RXN32303.1	A0A498NK93	24.0795		1						A0A498NUZ0
	A0A498NUZ0	A0A498NIJ4		A0A498NUZ0		A0A498MNF1		RXN32304.1	A0A498NKS3	23.2711		1						A0A498MNF1
	A0A498MNF1	A0A498M5K9		A0A498MNF1		A0A498NJE7		RXN32484.1	A0A498NL95		24.9863	1						A0A498NJE7
	A0A498NJE7	A0A498LFM1		A0A498NJE7		A0A498LWN5		RXN32778.1	A0A498NM02		25.9427	1						A0A498LWN5
	A0A498LWN5	A0A498LHT6		A0A498LWN5		A0A498NE74		RXN32833.1	A0A498NLP0	22.2243		1						A0A498NE74
	A0A498NE74	A0A498LN76		A0A498NE74		A0A498MCP4		RXN32896.1	A0A498NM96		19.6062	1						A0A498MCP4
	A0A498MCP4	A0A498L4B7		A0A498MCP4		A0A498MSN4		RXN33506.1	A0A498NNZ8		26.1339	1						A0A498MSN4
	A0A498MSN4	A0A498LU01		A0A498MSN4		A0A498MJ87		RXN33514.1	A0A498NPF5	25.5665		1						A0A498MJ87
	A0A498MJ87	A0A498MNF1		A0A498MJ87		A0A498NG29		RXN33518.1	A0A498NP15		22.4033	1						A0A498NG29
	A0A498NG29	A0A498NJE7		A0A498NG29		A0A498LC94		RXN33602.1	A0A498NNL7	21.4932		1						A0A498LC94
	A0A498LC94	A0A498NUZ0		A0A498LC94		A0A498M088		RXN33859.1	A0A498NQ81	30.2238		1						A0A498M088
	A0A498M088	A0A498MY66		A0A498M088		A0A498MHT8		RXN34201.1	A0A498NQU3	23.2697		1						A0A498MHT8
	A0A498MHT8	A0A498LWN5		A0A498MHT8		A0A498M4D0		RXN34273.1	A0A498NQT6		23.7706	1						A0A498M4D0
	A0A498M4D0	A0A498NE74		A0A498M4D0		A0A498M9V8		RXN34308.1	A0A498NRC1		25.1042	1						A0A498M9V8
	A0A498M9V8	A0A498MSN4		A0A498M9V8		A0A498LG80		RXN34338.1	A0A498NRF0		25.3048	1						A0A498LG80
	A0A498LG80	A0A498MJ87		A0A498LG80		A0A498MZR1		RXN34348.1	A0A498NRG2		24.6589	1						A0A498MZR1
	A0A498MZR1	A0A498NG29		A0A498MZR1		A0A498NA34		RXN34450.1	A0A498NQW1		25.0706	1						A0A498NA34
	A0A498NA34	A0A498LC94		A0A498NA34		A0A498NTH7		RXN34456.1	A0A498NRP9		25.1614	1						A0A498NTH7
	A0A498NTH7	A0A498M088		A0A498NTH7		A0A498NSK0		RXN34576.1	A0A498NS33	22.8113		1						A0A498NSK0
	A0A498NSK0	A0A498MHT8		A0A498NSK0		A0A498N4H0		RXN34660.1	A0A498NRH5		23.3497	1						A0A498N4H0
	A0A498N4H0	A0A498M9V8		A0A498N4H0		A0A498M8E6		RXN34819.1	A0A498NT95		21.8047	1						A0A498M8E6
	A0A498M8E6	A0A498LG80		A0A498M8E6		A0A498NBW5		RXN35172.1	A0A498NSR6		27.7374	1						A0A498NBW5
	A0A498NBW5	A0A498MZR1		A0A498NBW5		A0A498M6T7		RXN35193.1	A0A498NTA6		28.7284	1						A0A498M6T7
	A0A498M6T7	A0A498NK57		A0A498M6T7		A0A498N739		RXN35327.1	A0A498NV23	29.2453		1						A0A498N739
	A0A498N739	A0A498NSK0		A0A498N739		A0A498MDP7		RXN35433.1	A0A498NTZ9		23.6005	1						A0A498MDP7
	A0A498MDP7	A0A498NTH7		A0A498MDP7		A0A498N4T9		RXN35462.1	A0A498NTK2		27.9214	1						A0A498N4T9
	A0A498N4T9	A0A498N4H0		A0A498N4T9		A0A498LFI9		RXN36195.1	A0A498N1D9		24.7271	1						A0A498LFI9
	A0A498LFI9	A0A498MJX3		A0A498LFI9		A0A498NIJ4		RXN36403.1	A0A498NWS5		26.7653	1						A0A498NIJ4
	A0A498NIJ4	A0A498M8E6		A0A498NIJ4		A0A498LK15		RXN37737.1	A0A498P2S5	24.3128		1						A0A498LK15
	A0A498LK15	A0A498NBW5		A0A498LK15		A0A498M1K6		RXN37934.1	A0A498MMW8		24.9173	1						A0A498M1K6
	A0A498M1K6	A0A498L5W0		A0A498M1K6		A0A498NNZ4		RXN38446.1	A0A498P3E9		25.586	1						A0A498NNZ4
	A0A498NNZ4	A0A498N859		A0A498NNZ4		A0A498NGC0		RXN39586.1	A0A498P6Q2		26.3789	1						A0A498NGC0
	A0A498NGC0	A0A498L6A7		A0A498NGC0		A0A498NC53		RXN39638.1	A0A498P6G9	26.0426		1						A0A498NC53
	A0A498NC53	A0A498N739		A0A498NC53		A0A498MVB4		RXN02360.1	A0A498L1P6		23.688	1						A0A498MVB4
	A0A498MVB4	A0A498MBZ1		A0A498MVB4		A0A498MWH7		RXN02720.1	A0A498L2R3	26.9682		1						A0A498MWH7
	A0A498MWH7	A0A498MDP7		A0A498MWH7		A0A498MWX7		RXN02793.1	A0A498L5V1	22.386		1						A0A498MWX7
	A0A498MWX7	A0A498LJ30		A0A498MWX7		A0A498N8B5		RXN02906.1	A0A498L7U9	22.0432		1						A0A498N8B5
	A0A498N8B5	A0A498N8A7		A0A498N8B5		A0A498LBX2		RXN02993.1	A0A498L6D5		30.9393	1						A0A498LBX2
	A0A498LBX2	A0A498LK15		A0A498LBX2		A0A498MER7		RXN02999.1	A0A498L447		24.6485	1						A0A498MER7
	A0A498MER7	A0A498M1K6		A0A498MER7		A0A498M6A0		RXN03001.1	A0A498L3L2		31.8149	1						A0A498M6A0
	A0A498M6A0	A0A498NNZ4		A0A498M6A0		A0A498MBF7		RXN03002.1	A0A498L3L0		27.9781	1						A0A498MBF7
	A0A498MBF7	A0A498NGC0		A0A498MBF7		A0A498NN09		RXN03175.1	A0A498MQ09		24.0681	1						A0A498NN09
	A0A498NN09	A0A498NC53		A0A498NN09		A0A498N8E5		RXN03227.1	A0A498LBP1	23.9136		1						A0A498N8E5
	A0A498N8E5	A0A498MVB4		A0A498N8E5		A0A498N8T4		RXN03652.1	A0A498L5L6		23.8793	1						A0A498N8T4
	A0A498N8T4	A0A498LBX2		A0A498N8T4		A0A498NSQ8		RXN03817.1	A0A498LDI3		30.301	1						A0A498NSQ8
	A0A498NSQ8	A0A498MER7		A0A498NSQ8		A0A498LYC7		RXN03824.1	A0A498LBE8		22.787	1						A0A498LYC7
	A0A498LYC7	A0A498MWX7		A0A498LYC7		A0A498NFK2		RXN04104.1	A0A498LC72	23.1027		1						A0A498NFK2
	A0A498NFK2	A0A498N8B5		A0A498NFK2		A0A498NTL2		RXN04209.1	A0A498P542	22.7773		1						A0A498NTL2
	A0A498NTL2	A0A498MWH7		A0A498NTL2		A0A498L2G9		RXN04282.1	A0A498L7R7		30.6179	1						A0A498L2G9
	A0A498L2G9	A0A498MBF7		A0A498L2G9		A0A498LSX2		RXN04299.1	A0A498L7Q6	30.6791	30.3525	0						A0A498LSX2
	A0A498LSX2	A0A498M6A0		A0A498LSX2		A0A498MKR0		RXN05280.1	A0A498LAE0	23.6319	24.2391	0						A0A498MKR0
	A0A498MKR0	A0A498NN09		A0A498MKR0		A0A498N416		RXN05367.1	A0A498LI31		26.5095	1						A0A498N416
	A0A498N416	A0A498N8E5		A0A498N416		A0A498LN73		RXN05641.1	A0A498LBC2		24.2213	1						A0A498LN73
	A0A498LN73	A0A498LQX9		A0A498LN73		A0A498N424		RXN05676.1	A0A498LFD3	22.4242		1						A0A498N424
	A0A498N424	A0A498MFC2		A0A498N424		A0A498MAI2		RXN05678.1	A0A498LBW2		25.5294	1						A0A498MAI2
	A0A498MAI2	A0A498NSQ8		A0A498MAI2		A0A498N3H4		RXN05730.1	A0A498LBT2	27.5886	29.9005	0						A0A498N3H4
	A0A498N3H4	A0A498N8T4		A0A498N3H4		A0A498L8L0		RXN05793.1	A0A498MK11		27.7839	1						A0A498L8L0
	A0A498L8L0	A0A498LPH1		A0A498L8L0		A0A498LMW5		RXN05867.1	A0A498LJS0	24.7881	30.6606	0						A0A498LMW5
	A0A498LMW5	A0A498NTL2		A0A498LMW5		A0A498NU48		RXN05966.1	A0A498LG34	21.8257	29.1205	0						A0A498NU48
	A0A498NU48	A0A498L2G9		A0A498NU48		A0A498NCY2		RXN06006.1	A0A498LG68		23.8925	1						A0A498NCY2
	A0A498NCY2	A0A498LSX2		A0A498NCY2		A0A498NJB3		RXN06080.1	A0A498MNQ9	21.3481	27.4499	0						A0A498NJB3
	A0A498NJB3	A0A498MKR0		A0A498NJB3		A0A498LI98		RXN06152.1	A0A498LDA6	22.7615	21.6362	0						A0A498LI98
	A0A498LI98	A0A498N416		A0A498LI98		A0A498LQS7		RXN06230.1	A0A498LZI4		28.3156	1						A0A498LQS7
	A0A498LQS7	A0A498LN73		A0A498LQS7		A0A498P3I9		RXN06605.1	A0A498M4T8	21.7591	25.5993	0						A0A498P3I9
	A0A498P3I9	A0A498MAI2		A0A498P3I9		A0A498NXD1		RXN06677.1	A0A498LM58		22.3876	1						A0A498NXD1
	A0A498NXD1	A0A498N3H4		A0A498NXD1		A0A498MJZ1		RXN06842.1	A0A498N625	25.4578		1						A0A498MJZ1
	A0A498MJZ1	A0A498L8L0		A0A498MJZ1		A0A498M799		RXN06963.1	A0A498LHF5	24.4925		1						A0A498M799
	A0A498M799	A0A498MQX0		A0A498M799		A0A498LAX0		RXN07011.1	A0A498LFT2	27.9856	32.8906	0						A0A498LAX0
	A0A498LAX0	A0A498N7W1		A0A498LAX0		A0A498N8N2		RXN07133.1	A0A498LHW2		21.7031	1						A0A498N8N2
	A0A498N8N2	A0A498NU48		A0A498N8N2		A0A498MKC1		RXN07146.1	A0A498LJB0	24.5368		1						A0A498MKC1
	A0A498MKC1	A0A498NCY2		A0A498MKC1		A0A498LXI4		RXN07315.1	A0A498LPM6	26.6759	27.2521	0						A0A498LXI4
	A0A498LXI4	A0A498NJB3		A0A498LXI4		A0A498NHZ1		RXN07414.1	A0A498LL34		24.5011	1						A0A498NHZ1
	A0A498NHZ1	A0A498P3I9		A0A498NHZ1		A0A498NKF0		RXN07535.1	A0A498LQ86	21.2182		1						A0A498NKF0
	A0A498NKF0	A0A498NXD1		A0A498NKF0		A0A498LR94		RXN07646.1	A0A498LKV6		22.1842	1						A0A498LR94
	A0A498LR94	A0A498M799		A0A498LR94		A0A498LLS6		RXN07672.1	A0A498LIM4		20.7368	1						A0A498LLS6
	A0A498LLS6	A0A498LAX0		A0A498LLS6		A0A498LEC0		RXN07872.1	A0A498LJ59	21.154	26.9497	0						A0A498LEC0
	A0A498LEC0	A0A498N8N2		A0A498LEC0		A0A498MV49		RXN08123.1	A0A498N2G5	23.2096	27.4324	0						A0A498MV49
	A0A498MV49	A0A498MKC1		A0A498MV49		A0A498LYA4		RXN08480.1	A0A498LJR7	22.9713	22.2447	0						A0A498LYA4
	A0A498LYA4	A0A498LR94		A0A498LYA4		A0A498MMY3		RXN08907.1	A0A498LU12	23.8967		1						A0A498MMY3
	A0A498MMY3	A0A498LEC0		A0A498MMY3		A0A498NKL7		RXN08944.1	A0A498LQF9	21.0478	26.2094	0						A0A498NKL7
	A0A498NKL7	A0A498LLS6		A0A498NKL7		A0A498LYV2		RXN08971.1	A0A498LLS1	20.538	25.161	0						A0A498LYV2
	A0A498LYV2	A0A498LVU1		A0A498LYV2		A0A498NW58		RXN09044.1	A0A498LQQ5	27.1224		1						A0A498NW58
	A0A498NW58	A0A498M3M6		A0A498NW58		A0A498M1A1		RXN09056.1	A0A498LPN1	22.8564		1						A0A498M1A1
	A0A498M1A1	A0A498LYV2		A0A498M1A1		A0A498N8A7		RXN09080.1	A0A498LLG6		24.2586	1						A0A498N8A7
	A0A498N8A7	A0A498NW58		A0A498N8A7		A0A498NDY9		RXN09143.1	A0A498LNG6		23.2827	1						A0A498NDY9
	A0A498NDY9	A0A498M1A1		A0A498NDY9		A0A498MZT6		RXN09160.1	A0A498NZY2	26.0102	30.0893	0						A0A498MZT6
	A0A498MZT6	A0A498LYA4		A0A498MZT6		A0A498MAX9		RXN09353.1	A0A498LP02		18.3938	1						A0A498MAX9
	A0A498MAX9	A0A498MMY3		A0A498MAX9		A0A498L6L1		RXN09419.1	A0A498LLY0		22.9725	1						A0A498L6L1
	A0A498L6L1	A0A498NKL7		A0A498L6L1		A0A498MHN6		RXN09600.1	A0A498LN88	24.9453	28.6884	0						A0A498MHN6
	A0A498MHN6	A0A498NQF9		A0A498MHN6		A0A498LWG6		RXN09652.1	A0A498LPF1		23.581	1						A0A498LWG6
	A0A498LWG6	A0A498NFZ5		A0A498LWG6		A0A498MP80		RXN09738.1	A0A498LMT6	22.2767		1						A0A498MP80
	A0A498MP80	A0A498NDY9		A0A498MP80		A0A498NU75		RXN09756.1	A0A498LRP6		26.6948	1						A0A498NU75
	A0A498NU75	A0A498MT89		A0A498NU75		A0A498NBA5		RXN10340.1	A0A498LQ91		22.024	1						A0A498NBA5
	A0A498NBA5	A0A498NE08		A0A498NBA5		A0A498NRB1		RXN10636.1	A0A498LU40	23.4691		1						A0A498NRB1
	A0A498NQX0	A0A498MAX9		A0A498NQX0		A0A498MPV2		RXN10649.1	A0A498LQH0	22.7667	25.0829	0						A0A498MPV2
	A0A498NRB1	A0A498MZT6		A0A498NRB1		A0A498LV15		RXN10655.1	A0A498LZ34	25.879	27.1638	0						A0A498LV15
	A0A498MPV2	A0A498NU75		A0A498MPV2		A0A498NF37		RXN10688.1	A0A498LQI5	25.387	28.1459	0						A0A498NF37
	A0A498LV15	A0A498N372		A0A498LV15		A0A498MEW8		RXN10892.1	A0A498LT79	22.9399		1						A0A498MEW8
	A0A498NF37	A0A498NQX0		A0A498NF37		A0A498NI12		RXN11025.1	A0A498M044	23.0219	21.1987	0						A0A498NI12
	A0A498MEW8	A0A498NRB1		A0A498MEW8		A0A498M343		RXN11068.1	A0A498LRJ3		25.6449	1						A0A498M343
	A0A498NI12	A0A498MPV2		A0A498NI12		A0A498MCA2		RXN11075.1	A0A498M0F5	24.1707	21.5921	0						A0A498MCA2
	A0A498M343	A0A498NF37		A0A498M343		A0A498MPQ6		RXN11239.1	A0A498LS47	23.0958	26.3853	0						A0A498MPQ6
	A0A498MCA2	A0A498MEW8		A0A498MCA2		A0A498NHE1		RXN11323.1	A0A498LUN0		25.6842	1						A0A498NHE1
	A0A498MPQ6	A0A498NI12		A0A498MPQ6		A0A498LM55		RXN11408.1	A0A498LSH3	22.7544		1						A0A498LM55
	A0A498NHE1	A0A498M343		A0A498NHE1		A0A498MMX0		RXN11542.1	A0A498LV59	26.3937		1						A0A498MMX0
	A0A498LM55	A0A498MI27		A0A498LM55		A0A498MZH9		RXN11831.1	A0A498LUH2	30.1635	34.3019	0						A0A498MZH9
	A0A498MMX0	A0A498MCA2		A0A498MMX0		A0A498N8Y0		RXN12821.1	A0A498LX53	26.2546	25.3687	0						A0A498N8Y0
	A0A498MZH9	A0A498MPQ6		A0A498MZH9		A0A498MPP0		RXN12841.1	A0A498LX75	22.6215	23.1201	0						A0A498MPP0
	A0A498N8Y0	A0A498NNG8		A0A498N8Y0		A0A498LBM3		RXN13269.1	A0A498M5E4	24.5227	26.3664	0						A0A498LBM3
	A0A498MPP0	A0A498NGW6		A0A498MPP0		A0A498NK94		RXN13314.1	A0A498M2G5	25.0532	22.7277	0						A0A498NK94
	A0A498LBM3	A0A498N4R1		A0A498LBM3		A0A498LMW6		RXN13513.1	A0A498M116		20.3703	1						A0A498LMW6
	A0A498NK94	A0A498MFE1		A0A498NK94		A0A498MLJ2		RXN13930.1	A0A498M070	23.7563	23.2757	0						A0A498MLJ2
	A0A498LMW6	A0A498MMX0		A0A498LMW6		A0A498MSB4		RXN14046.1	A0A498M3J5	26.8875		1						A0A498MSB4
	A0A498MLJ2	A0A498N8Y0		A0A498MLJ2		A0A498LMU5		RXN14534.1	A0A498M5S1	29.2001	34.8866	0						A0A498LMU5
	A0A498MSB4	A0A498LBM3		A0A498MSB4		A0A498MRU4		RXN15248.1	A0A498M321	25.8526		1						A0A498MRU4
	A0A498LMU5	A0A498N5G6		A0A498LMU5		A0A498MWR2		RXN15426.1	A0A498M7J5	23.4927		1						A0A498MWR2
	A0A498MRU4	A0A498LV15		A0A498MRU4		A0A498NQB1		RXN15841.1	A0A498M5J5	25.8497		1						A0A498NQB1
	A0A498MWR2	A0A498L6L1		A0A498MWR2		A0A498NRX4		RXN15860.1	A0A498M5Q9	23.0408	25.1351	0						A0A498NRX4
	A0A498NQB1	A0A498L6K6		A0A498NQB1		A0A498LB57		RXN15861.1	A0A498M5L2	23.3542	25.6028	0						A0A498LB57
	A0A498NRX4	A0A498NKU9		A0A498NRX4		A0A498MN60		RXN16117.1	A0A498MGJ7		27.8303	1						A0A498MN60
	A0A498LB57	A0A498MJE0		A0A498LB57		A0A498MEV5		RXN16195.1	A0A498MFD2	21.1978		1						A0A498MEV5
	A0A498MN60	A0A498MLJ2		A0A498MN60		A0A498NMS8		RXN16389.1	A0A498M657		22.7341	1						A0A498NMS8
	A0A498MEV5	A0A498MSB4		A0A498MEV5		A0A498NUJ2		RXN16434.1	A0A498MB00		29.0554	1						A0A498NUJ2
	A0A498NMS8	A0A498LMU5		A0A498NMS8		A0A498NT33		RXN16614.1	A0A498MBG2	27.6298		1						A0A498NT33
	A0A498NUJ2	A0A498MRU4		A0A498NUJ2		A0A498MHP4		RXN16639.1	A0A498M6W2		24.3856	1						A0A498MHP4
	A0A498NT33	A0A498MYE6		A0A498NT33		A0A498N8F6		RXN16713.1	A0A498MA91		20.4384	1						A0A498N8F6
	A0A498MHP4	A0A498MPS7		A0A498MHP4		A0A498P5M2		RXN16851.1	A0A498LI49	28.0213	32.4423	0						A0A498P5M2
	A0A498N8F6	A0A498LPT3		A0A498N8F6		A0A498N3J9		RXN17038.1	A0A498M7W9		25.9115	1						A0A498N3J9
	A0A498P5M2	A0A498MCL6		A0A498P5M2		A0A498NR65		RXN17059.1	A0A498M7Y7		25.273	1						A0A498NR65
	A0A498N3J9	A0A498MWR2		A0A498N3J9		A0A498NE08		RXN17308.1	A0A498M8L1		26.3376	1						A0A498NE08
	A0A498NR65	A0A498NQB1		A0A498NR65		A0A498LQJ5		RXN17348.1	A0A498M8N7	23.8365		1						A0A498LQJ5
	A0A498NE08	A0A498LB57		A0A498NE08		A0A498NTD8		RXN17402.1	A0A498MDE1	22.1201	25.7469	0						A0A498NTD8
	A0A498LQJ5	A0A498MN60		A0A498LQJ5		A0A498P6G7		RXN17577.1	A0A498MKR8	24.0721	24.8222	0						A0A498P6G7
	A0A498NTD8	A0A498N6M3		A0A498NTD8		A0A498NNW4		RXN17716.1	A0A498MFG7		24.882	1						A0A498NNW4
	A0A498P6G7	A0A498NLX9		A0A498P6G7		A0A498LPI1		RXN17761.1	A0A498MAC3		25.4187	1						A0A498LPI1
	A0A498NNW4	A0A498NUJ2		A0A498NNW4		A0A498L8B5		RXN17764.1	A0A498MEL6		21.4264	1						A0A498L8B5
	A0A498LPI1	A0A498LJP8		A0A498LPI1		A0A498NJ09		RXN17839.1	A0A498M9W0	27.4396	25.8555	0						A0A498NJ09
	A0A498L8B5	A0A498MHP4		A0A498L8B5		A0A498MHN3		RXN17851.1	A0A498MAI7		23.2077	1						A0A498MHN3
	A0A498NJ09	A0A498NT33		A0A498NJ09		A0A498NF29		RXN18006.1	A0A498MGE7		25.5387	1						A0A498NF29
	A0A498MHN3	A0A498NHX3		A0A498MHN3		A0A498M3Z6		RXN18042.1	A0A498MF99		23.5063	1						A0A498M3Z6
	A0A498NF29	A0A498N8F6		A0A498NF29		A0A498LW12		RXN18060.1	A0A498MCU7		26.7337	1						A0A498LW12
	A0A498M3Z6	A0A498P5M2		A0A498M3Z6		A0A498L5W0		RXN18103.1	A0A498ME95		25.1951	1						A0A498L5W0
	A0A498LW12	A0A498N3J9		A0A498LW12		A0A498L707		RXN18104.1	A0A498MFG2		29.3479	1						A0A498L707
	A0A498NQP7	A0A498NR65		A0A498NQP7		A0A498NK69		RXN18105.1	A0A498MLK4		26.2405	1						A0A498NK69
	A0A498L5W0	A0A498N016		A0A498L5W0		A0A498LH60		RXN18106.1	A0A498MGP2		29.4288	1						A0A498LH60
	A0A498L707	A0A498LBP2		A0A498L707		A0A498NJK1		RXN18111.1	A0A498MB48		31.8243	1						A0A498NJK1
	A0A498NK69	A0A498MWN1		A0A498NK69		A0A498M3M6		RXN18173.1	A0A498MEG3		27.1938	1						A0A498M3M6
	A0A498LH60	A0A498P6G7		A0A498LH60		A0A498LVU1		RXN18248.1	A0A498MAX6	24.2593	24.0694	0						A0A498LVU1
	A0A498NJK1	A0A498NBE6		A0A498NJK1		A0A498LR76		RXN18272.1	A0A498MFY1		23.5304	1						A0A498LR76
	A0A498M3M6	A0A498MHM1		A0A498M3M6		A0A498NS01		RXN18410.1	A0A498ME31		22.3046	1						A0A498NS01
	A0A498LVU1	A0A498LPI1		A0A498LVU1		A0A498MTH9		RXN18441.1	A0A498MBX9	22.4723	25.8116	0						A0A498MTH9
	A0A498LR76	A0A498N206		A0A498LR76		A0A498NU78		RXN18757.1	A0A498MP20		27.7344	1						A0A498NU78
	A0A498NS01	A0A498L8B5		A0A498NS01		A0A498N4E6		RXN18948.1	A0A498MCS1	20.1188		1						A0A498N4E6
	A0A498MTH9	A0A498NJ09		A0A498MTH9		A0A498MS62		RXN19099.1	A0A498MD78		23.9379	1						A0A498MS62
	A0A498NU78	A0A498MHN3		A0A498NU78		A0A498MD37		RXN19811.1	A0A498MSV7		26.6472	1						A0A498MD37
	A0A498N4E6	A0A498NAG6		A0A498N4E6		A0A498LZ42		RXN19837.1	A0A498MSB9		22.1096	1						A0A498LZ42
	A0A498MS62	A0A498MY97		A0A498MS62		A0A498MR69		RXN19969.1	A0A498MFH6	30.1962	24.8147	0						A0A498MR69
	A0A498MD37	A0A498NF29		A0A498MD37		A0A498NK70		RXN19978.1	A0A498MFG1		24.7592	1						A0A498NK70
	A0A498LZ42	A0A498L8Q0		A0A498LZ42		A0A498L508		RXN20040.1	A0A498MIR4		30.7484	1						A0A498L508
	A0A498MR69	A0A498M3Z6		A0A498MR69		A0A498NME5		RXN20172.1	A0A498MKZ9	22.7647	27.0149	0						A0A498NME5
	A0A498NK70	A0A498LW12		A0A498NK70		A0A498L371		RXN20198.1	A0A498MG29	22.2438	27.6748	0						A0A498L371
	A0A498L508	A0A498NQP7		A0A498L508		A0A498MDL6		RXN20200.1	A0A498MJ42		20.2554	1						A0A498MDL6
	A0A498NME5	A0A498L707		A0A498NME5		A0A498NK38		RXN20210.1	A0A498MJ49		24.7484	1						A0A498NK38
	A0A498L371	A0A498NK69		A0A498L371		A0A498MTZ4		RXN20256.1	A0A498MNK5		23.4206	1						A0A498MTZ4
	A0A498MDL6	A0A498N908		A0A498MDL6		A0A498LBI5		RXN20258.1	A0A498MG83		23.8886	1						A0A498LBI5
	A0A498NK38	A0A498NJK1		A0A498NK38		A0A498L4F1		RXN20434.1	A0A498MM38		23.5527	1						A0A498L4F1
	A0A498MTZ4	A0A498LR76		A0A498MTZ4		A0A498N4I9		RXN20810.1	A0A498NZF6	21.9043		1						A0A498N4I9
	A0A498LBI5	A0A498MTH9		A0A498LBI5		A0A498M7I3		RXN20929.1	A0A498MI06	22.9314		1						A0A498M7I3
	A0A498L4F1	A0A498N4E6		A0A498L4F1		A0A498N001		RXN21071.1	A0A498MJ08	23.8018	28.7849	0						A0A498N001
	A0A498N4I9	A0A498MS62		A0A498N4I9		A0A498N5E1		RXN21435.1	A0A498MXQ9	23.7584	26.6328	0						A0A498N5E1
	A0A498M7I3	A0A498MD37		A0A498M7I3		A0A498MEQ4		RXN21452.1	A0A498MPA1		20.7519	1						A0A498MEQ4
	A0A498N001	A0A498LZ42		A0A498N001		A0A498NSH4		RXN21465.1	A0A498MXU0	23.4674	24.5276	0						A0A498NSH4
	A0A498N5E1	A0A498NK70		A0A498N5E1		A0A498NP09		RXN21562.1	A0A498MPK1	23.0476	29.841	0						A0A498NP09
	A0A498MEQ4	A0A498MTZ4		A0A498MEQ4		A0A498NJ12		RXN21617.1	A0A498MYF3	21.7056	20.7704	0						A0A498NJ12
	A0A498NSH4	A0A498LBI5		A0A498NSH4		A0A498N372		RXN21673.1	A0A498MPE7	22.902	23.5327	0						A0A498N372
	A0A498NP09	A0A498M7I3		A0A498NP09		A0A498MEA3		RXN22087.1	A0A498N5C0	24.1391	21.8711	0						A0A498MEA3
	A0A498NJ12	A0A498NPZ7		A0A498NJ12		A0A498MXQ4		RXN22532.1	A0A498MSI3	21.7899	25.1746	0						A0A498MXQ4
	A0A498N372	A0A498N001		A0A498N372		A0A498LT27		RXN22670.1	A0A498MQM3	25.9865		1						A0A498LT27
	A0A498MEA3	A0A498N5E1		A0A498MEA3		A0A498NKU9		RXN22682.1	A0A498MSW9	21.8604	26.3147	0						A0A498NKU9
	A0A498MXQ4	A0A498MEQ4		A0A498MXQ4		A0A498L6K6		RXN23391.1	A0A498MRI5	23.9901		1						A0A498L6K6
	A0A498LT27	A0A498NP09		A0A498LT27		A0A498MJP2		RXN23402.1	A0A498MYZ9	25.7477	26.5428	0						A0A498MJP2
	A0A498NKU9	A0A498NSH4		A0A498NKU9		A0A498LG69		RXN24146.1	A0A498N0S9	21.9812		1						A0A498LG69
	A0A498L6K6	A0A498NJ12		A0A498L6K6		A0A498MXY6		RXN24251.1	A0A498MUL3	22.9811		1						A0A498MXY6
	A0A498MJP2	A0A498MEA3		A0A498MJP2		A0A498N0J0		RXN24268.1	A0A498MRM7	27.7405	30.1732	0						A0A498N0J0
	A0A498LG69	A0A498MXQ4		A0A498LG69		A0A498NJ90		RXN24303.1	A0A498MWU4	23.4084		1						A0A498NJ90
	A0A498MXY6	A0A498LT27		A0A498MXY6		A0A498NJ14		RXN24396.1	A0A498N1H1	24.7591	20.9883	0						A0A498NJ14
	A0A498N0J0	A0A498MJP2		A0A498N0J0		A0A498L7R5		RXN24440.1	A0A498MUQ2	24.9171		1						A0A498L7R5
	A0A498NJ90	A0A498LG69		A0A498NJ90		A0A498MJ92		RXN24489.1	A0A498MS66	23.0991		1						A0A498MJ92
	A0A498NJ14	A0A498MXY6		A0A498NJ14		A0A498NZL4		RXN24671.1	A0A498MW63	27.1581		1						A0A498NZL4
	A0A498L7R5	A0A498N0J0		A0A498L7R5		A0A498NEK6		RXN24686.1	A0A498N2F1	26.3977		1						A0A498NEK6
	A0A498MJ92	A0A498NJ90		A0A498MJ92		A0A498MUW2		RXN24787.1	A0A498N847		24.9599	1						A0A498MUW2
	A0A498NZL4	A0A498NJ14		A0A498NZL4		A0A498NKA7		RXN24799.1	A0A498MSW6	22.0799	24.152	0						A0A498NKA7
	A0A498NEK6	A0A498MKW9		A0A498NEK6		A0A498LPM6		RXN25199.1	A0A498MTQ2		22.5812	1						A0A498LPM6
	A0A498MUW2	A0A498P2C4		A0A498MUW2		A0A498MKG8		RXN25274.1	A0A498N0I5	25.2888		1						A0A498MKG8
	A0A498NKA7	A0A498P454		A0A498NKA7		A0A498NMX0		RXN25318.1	A0A498MU82	33.5918	28.8787	0						A0A498NMX0
	A0A498LPM6	A0A498NA00		A0A498LPM6		A0A498NQ62		RXN25334.1	A0A498N0P8		20.0806	1						A0A498NQ62
	A0A498MKG8	A0A498L7R5		A0A498MKG8		A0A498LU80		RXN25502.1	A0A498N149	22.1822		1						A0A498LU80
	A0A498NMX0	A0A498NZL4		A0A498NMX0		A0A498N5R4		RXN25676.1	A0A498N572	24.6706		1						A0A498N5R4
	A0A498NQ62	A0A498NEK6		A0A498NQ62		A0A498M147		RXN25805.1	A0A498N9Q3		26.8831	1						A0A498M147
	A0A498LU80	A0A498MUW2		A0A498LU80		A0A498L8V2		RXN25806.1	A0A498N5I5	23.968	21.8471	0						A0A498L8V2
	A0A498N5R4	A0A498LPM6		A0A498N5R4		A0A498LMQ4		RXN26008.1	A0A498MVW3		24.7053	1						A0A498LMQ4
	A0A498M147	A0A498MKG8		A0A498M147		A0A498NKN9		RXN26040.1	A0A498MYZ3	22.4753	22.2284	0						A0A498NKN9
	A0A498L8V2	A0A498NMX0		A0A498L8V2		A0A498L4D0		RXN26512.1	A0A498N3W5		24.9261	1						A0A498L4D0
	A0A498LMQ4	A0A498NS01		A0A498LMQ4		A0A498N2L8		RXN26568.1	A0A498MXB6	22.5111	21.5845	0						A0A498N2L8
	A0A498NKN9	A0A498MD95		A0A498NKN9		A0A498N6E3		RXN26610.1	A0A498MUC5	24.0384	24.9679	0						A0A498N6E3
	A0A498L4D0	A0A498NQ62		A0A498L4D0		A0A498NA00		RXN26699.1	A0A498MXF2	21.5621	22.7158	0						A0A498NA00
	A0A498N2L8	A0A498LU80		A0A498N2L8		A0A498NED9		RXN26894.1	A0A498N5D6	20.739	22.8733	0						A0A498NED9
	A0A498N6E3	A0A498MDL6		A0A498N6E3		A0A498M9R9		RXN27000.1	A0A498N1R8	22.5648	24.7508	0						A0A498M9R9
	A0A498NA00	A0A498N5R4		A0A498NA00		A0A498NKW3		RXN27042.1	A0A498N5G7	25.0172	26.2131	0						A0A498NKW3
	A0A498NED9	A0A498L8V2		A0A498NED9		A0A498N7R7		RXN27196.1	A0A498N981		25.1377	1						A0A498N7R7
	A0A498M9R9	A0A498LMQ4		A0A498M9R9		A0A498NSN9		RXN27229.1	A0A498LJY8	23.7119		1						A0A498NSN9
	A0A498NKW3	A0A498NKN9		A0A498NKW3		A0A498MWD3		RXN27294.1	A0A498N6I2		28.6615	1						A0A498MWD3
	A0A498N7R7	A0A498L4D0		A0A498N7R7		A0A498N4K6		RXN27331.1	A0A498N3J3	24.6689	24.383	0						A0A498N4K6
	A0A498NSN9	A0A498NBX4		A0A498NSN9		A0A498MQY2		RXN27567.1	A0A498NDQ5		23.5143	1						A0A498MQY2
	A0A498MWD3	A0A498N2L8		A0A498MWD3		A0A498N525		RXN27702.1	A0A498N7P1	27.4017	23.4448	0						A0A498N525
	A0A498N4K6	A0A498N6E3		A0A498N4K6		A0A498MPV8		RXN28112.1	A0A498N8Q8		22.7192	1						A0A498MPV8
	A0A498MQY2	A0A498NED9		A0A498MQY2		A0A498ND79		RXN28258.1	A0A498N271		24.9026	1						A0A498ND79
	A0A498N525	A0A498N2N2		A0A498N525		A0A498LUJ4		RXN28326.1	A0A498NBS6		24.4829	1						A0A498LUJ4
	A0A498MPV8	A0A498M7R6		A0A498MPV8		A0A498LSH0		RXN28432.1	A0A498M4A4		21.0063	1						A0A498LSH0
	A0A498ND79	A0A498MFI3		A0A498ND79		A0A498MZB8		RXN28576.1	A0A498NC79	25.0752	22.5983	0						A0A498MZB8
	A0A498LUJ4	A0A498NSN9		A0A498LUJ4		A0A498MHR0		RXN28636.1	A0A498NCB9	24.0755		1						A0A498MHR0
	A0A498LSH0	A0A498MWD3		A0A498LSH0		A0A498NBQ9		RXN28717.1	A0A498NEP4	21.891		1						A0A498NBQ9
	A0A498MZB8	A0A498LVZ1		A0A498MZB8		A0A498NN34		RXN28794.1	A0A498NAL4		24.9692	1						A0A498NN34
	A0A498MHR0	A0A498LX98		A0A498MHR0		A0A498NHU6		RXN28797.1	A0A498NER6	22.5742	23.752	0						A0A498NHU6
	A0A498NBQ9	A0A498MWF4		A0A498NBQ9		A0A498NAG6		RXN28858.1	A0A498N421		23.8528	1						A0A498NAG6
	A0A498NN34	A0A498MG05		A0A498NN34		A0A498NP84		RXN29001.1	A0A498N804	24.1076	23.6305	0						A0A498NP84
	A0A498NHU6	A0A498MXA8		A0A498NHU6		A0A498LKB6		RXN29007.1	A0A498NEW2	25.6033	31.3059	0						A0A498LKB6
	A0A498NAG6	A0A498N525		A0A498NAG6		A0A498MT53		RXN29015.1	A0A498NEM6	23.9074		1						A0A498MT53
	A0A498NP84	A0A498MQY2		A0A498NP84		A0A498NAQ7		RXN29034.1	A0A498NB66		31.9673	1						A0A498NAQ7
	A0A498LKB6	A0A498MPV8		A0A498LKB6		A0A498N8H1		RXN29063.1	A0A498N9R2		21.9795	1						A0A498N8H1
	A0A498MT53	A0A498LUJ4		A0A498MT53		A0A498LB61		RXN29070.1	A0A498N7T5	31.5793	30.5942	0						A0A498LB61
	A0A498NAQ7	A0A498LSH0		A0A498NAQ7		A0A498NSS6		RXN29144.1	A0A498NBF1	22.3649	25.2486	0						A0A498NSS6
	A0A498N8H1	A0A498MZB8		A0A498N8H1		A0A498L9E6		RXN29160.1	A0A498N889		24.4745	1						A0A498L9E6
	A0A498LB61	A0A498L7C3		A0A498LB61		A0A498MM69		RXN29518.1	A0A498N5W5	21.9084	24.8615	0						A0A498MM69
	A0A498NSS6	A0A498NBQ9		A0A498NSS6		A0A498P165		RXN29534.1	A0A498NC81	22.7888		1						A0A498P165
	A0A498L9E6	A0A498NN34		A0A498L9E6		A0A498LN53		RXN29580.1	A0A498N991	22.021		1						A0A498LN53
	A0A498MM69	A0A498NJ31		A0A498MM69		A0A498LFH6		RXN29656.1	A0A498NDX1	24.8575	29.1123	0						A0A498LFH6
	A0A498P165	A0A498NHU6		A0A498P165		A0A498N4A0		RXN29874.1	A0A498NCT6		25.8624	1						A0A498N4A0
	A0A498LN53	A0A498LKB6		A0A498LN53		A0A498LH59		RXN29880.1	A0A498N9Z4	26.1234	31.0768	0						A0A498LH59
	A0A498LFH6	A0A498M6Y5		A0A498LFH6		A0A498LR06		RXN30376.1	A0A498NEJ9		24.484	1						A0A498LR06
	A0A498N4A0	A0A498NAQ7		A0A498N4A0		A0A498MZ60		RXN30576.1	A0A498NER5	24.9606		1						A0A498MZ60
	A0A498LH59	A0A498LB61		A0A498LH59		A0A498NRI9		RXN30726.1	A0A498NFX0	21.6365	27.3429	0						A0A498NRI9
	A0A498LR06	A0A498NSS6		A0A498LR06		A0A498MT89		RXN30750.1	A0A498NFY8	22.8399		1						A0A498MT89
	A0A498MZ60	A0A498L9E6		A0A498MZ60		A0A498NNM6		RXN30821.1	A0A498P0A0	24.6786		1						A0A498NNM6
	A0A498NRI9	A0A498MM69		A0A498NRI9		A0A498LVZ6		RXN31015.1	A0A498NGP9	23.1938	23.4031	0						A0A498LVZ6
	A0A498MT89	A0A498LN53		A0A498MT89		A0A498LAX4		RXN31291.1	A0A498NHJ6	21.4499	24.3605	0						A0A498LAX4
	A0A498NNM6	A0A498P165		A0A498NNM6		A0A498NIJ2		RXN31374.1	A0A498NHZ9	23.0059		1						A0A498NIJ2
	A0A498LVZ6	A0A498N4A0		A0A498LVZ6		A0A498LS47		RXN31402.1	A0A498NHR6		25.3495	1						A0A498LS47
	A0A498LAX4	A0A498LFH6		A0A498LAX4		A0A498LQD7		RXN31471.1	A0A498NI19	25.998		1						A0A498LQD7
	A0A498NIJ2	A0A498LR06		A0A498NIJ2		A0A498N6N5		RXN31779.1	A0A498NMS2	20.9434	23.4831	0						A0A498N6N5
	A0A498LS47	A0A498LWY3		A0A498LS47		A0A498MDH6		RXN31895.1	A0A498NJ86	21.5458	28.4205	0						A0A498MDH6
	A0A498LQD7	A0A498L582		A0A498LQD7		A0A498MG41		RXN31905.1	A0A498NJ95	25.468	26.3769	0						A0A498MG41
	A0A498N6N5	A0A498NKW3		A0A498N6N5		A0A498MMT5		RXN31945.1	A0A498NJD8		25.2829	1						A0A498MMT5
	A0A498MDH6	A0A498LI31		A0A498MDH6		A0A498NF81		RXN31984.1	A0A498NJV8	24.832	20.9267	0						A0A498NF81
	A0A498MG41	A0A498NRI9		A0A498MG41		A0A498MKE8		RXN32052.1	A0A498NJF0	21.4175	26.4711	0						A0A498MKE8
	A0A498MMT5	A0A498NNM6		A0A498MMT5		A0A498MVQ2		RXN32063.1	A0A498NJL8	25.4415		1						A0A498MVQ2
	A0A498NF81	A0A498LVZ6		A0A498NF81		A0A498MF51		RXN32233.1	A0A498NK36	23.936	29.3295	0						A0A498MF51
	A0A498MKE8	A0A498LQD7		A0A498MKE8		A0A498MKL8		RXN32234.1	A0A498NKK1	24.4988	25.0124	0						A0A498MKL8
	A0A498MVQ2	A0A498NIJ2		A0A498MVQ2		A0A498MH82		RXN32240.1	A0A498NJY6		24.698	1						A0A498MH82
	A0A498MF51	A0A498LS47		A0A498MF51		A0A498MEP5		RXN32277.1	A0A498NL15	23.8691	24.9025	0						A0A498MEP5
	A0A498MKL8	A0A498N6N5		A0A498MKL8		A0A498LGY3		RXN32318.1	A0A498NKH6	22.7219	27.5139	0						A0A498LGY3
	A0A498MH82	A0A498MMT5		A0A498MH82		A0A498P434		RXN32490.1	A0A498NKL2	25.978		1						A0A498P434
	A0A498MEP5	A0A498LYA1		A0A498MEP5		A0A498L4V5		RXN32546.1	A0A498NL97		29.4738	1						A0A498L4V5
	A0A498LGY3	A0A498NJ86		A0A498LGY3		A0A498ME07		RXN32685.1	A0A498NLE5		22.557	1						A0A498ME07
	A0A498P434	A0A498N3F6		A0A498P434		A0A498N7H4		RXN32743.1	A0A498NLG4	21.7719	22.2549	0						A0A498N7H4
	A0A498L4V5	A0A498NF81		A0A498L4V5		A0A498M1Y0		RXN33359.1	A0A498NNM6		27.3642	1						A0A498M1Y0
	A0A498ME07	A0A498MKE8		A0A498ME07		A0A498MNH9		RXN33391.1	A0A498NNJ4	23.6646	30.0532	0						A0A498MNH9
	A0A498N7H4	A0A498MVQ2		A0A498N7H4		A0A498ML40		RXN33447.1	A0A498NPH4	27.8236		1						A0A498ML40
	A0A498M1Y0	A0A498MF51		A0A498M1Y0		A0A498NLK2		RXN33719.1	A0A498MZZ3	26.4333		1						A0A498NLK2
	A0A498MNH9	A0A498LH59		A0A498MNH9		A0A498LMP5		RXN33761.1	A0A498NPL4	22.5213	22.334	0						A0A498LMP5
	A0A498ML40	A0A498MF43		A0A498ML40		A0A498LLS3		RXN33774.1	A0A498NQD2	22.7533	22.2631	0						A0A498LLS3
	A0A498NLK2	A0A498MH82		A0A498NLK2		A0A498MUR0		RXN33820.1	A0A498NP48		24.462	1						A0A498MUR0
	A0A498LMP5	A0A498NNF7		A0A498LMP5		A0A498MDH5		RXN34216.1	A0A498NR10	22.6181	22.006	0						A0A498MDH5
	A0A498LLS3	A0A498NSQ2		A0A498LLS3		A0A498LFY8		RXN34263.1	A0A498NQS5		21.5907	1						A0A498LFY8
	A0A498MUR0	A0A498NE56		A0A498MUR0		A0A498N232		RXN34281.1	A0A498NR18		20.4181	1						A0A498N232
	A0A498MDH5	A0A498LGY3		A0A498MDH5		A0A498MAC6		RXN34294.1	A0A498NRX6	22.7137		1						A0A498MAC6
	A0A498LFY8	A0A498P434		A0A498LFY8		A0A498NKP3		RXN34329.1	A0A498NRL8	24.1767	29.8298	0						A0A498NKP3
	A0A498N232	A0A498L4V5		A0A498N232		A0A498LCC7		RXN34380.1	A0A498NQP6		24.1421	1						A0A498LCC7
	A0A498MAC6	A0A498NP91		A0A498MAC6		A0A498MWN1		RXN34714.1	A0A498NT58	34.579	22.0533	0						A0A498MWN1
	A0A498NKP3	A0A498N7H4		A0A498NKP3		A0A498NXY1		RXN34801.1	A0A498NSH1	23.765		1						A0A498NXY1
	A0A498LCC7	A0A498M1Y0		A0A498LCC7		A0A498NK32		RXN34857.1	A0A498NTP0	23.0053	22.3148	0						A0A498NK32
	A0A498MWN1	A0A498MEP5		A0A498MWN1		A0A498MJQ9		RXN35017.1	A0A498NU49	23.8158	28.115	0						A0A498MJQ9
	A0A498NXY1	A0A498MNH9		A0A498NXY1		A0A498NW20		RXN35150.1	A0A498NSQ4		21.4798	1						A0A498NW20
	A0A498NK32	A0A498N9I9		A0A498NK32		A0A498LKF3		RXN35283.1	A0A498NTJ9	23.1411		1						A0A498LKF3
	A0A498MJQ9	A0A498LWH4		A0A498MJQ9		A0A498MN61		RXN35284.1	A0A498NUR6		25.4131	1						A0A498MN61
	A0A498NW20	A0A498MN61		A0A498NW20		A0A498MYM2		RXN35352.1	A0A498NT93		24.0936	1						A0A498MYM2
	A0A498LKF3	A0A498LQK9		A0A498LKF3		A0A498MAE5		RXN35355.1	A0A498NTJ8		24.4317	1						A0A498MAE5
	A0A498MN61	A0A498MNR7		A0A498MN61		A0A498ND70		RXN35551.1	A0A498NUH2	29.1429	29.4753	0						A0A498ND70
	A0A498MYM2	A0A498NMS8		A0A498MYM2		A0A498N7F9		RXN35758.1	A0A498NVJ7	21.7963		1						A0A498N7F9
	A0A498MAE5	A0A498NAK3		A0A498MAE5		A0A498NA39		RXN35782.1	A0A498NUG2	33.1982		1						A0A498NA39
	A0A498ND70	A0A498MA66		A0A498ND70		A0A498NIR7		RXN36034.1	A0A498NX04	21.8023	26.8334	0						A0A498NIR7
	A0A498N7F9	A0A498L5J2		A0A498N7F9		A0A498LQK4		RXN36410.1	A0A498NW55		23.6991	1						A0A498LQK4
	A0A498NA39	A0A498NLK2		A0A498NA39		A0A498M9B4		RXN36923.1	A0A498NYE1	21.2455		1						A0A498M9B4
	A0A498NIR7	A0A498MSE0		A0A498NIR7		A0A498NRK4		RXN37123.1	A0A498MYU8	23.4245	26.3313	0						A0A498NRK4
	A0A498LQK4	A0A498LMP5		A0A498LQK4		A0A498N271		RXN37488.1	A0A498P0B7	22.8054	24.6301	0						A0A498N271
	A0A498M9B4	A0A498LLS3		A0A498M9B4		A0A498NAS7		RXN38076.1	A0A498MVL2	20.5939		1						A0A498NAS7
	A0A498NRK4	A0A498N4Y4		A0A498NRK4		A0A498MVF3		RXN38822.1	A0A498P2G6		26.8024	1						A0A498MVF3
	A0A498N271	A0A498MTN2		A0A498N271		A0A498LTK5		RXN38951.1	A0A498P422		23.3246	1						A0A498LTK5
	A0A498NAS7	A0A498MX98		A0A498NAS7		A0A498LPX7		RXN39200.1	A0A498P3G3	24.0521	23.3044	0						A0A498LPX7
	A0A498MVF3	A0A498MDH5		A0A498MVF3		A0A498LHP7		RXN02424.1	A0A498L7K2	21.9099	26.2971	0						A0A498LHP7
	A0A498LTK5	A0A498LFY8		A0A498LTK5		A0A498MI27		RXN02638.1	A0A498LQD7	20.726	28.9782	0						A0A498MI27
	A0A498LPX7	A0A498N232		A0A498LPX7		A0A498NQY9		RXN02733.1	A0A498MUU4		23.5278	1						A0A498NQY9
	A0A498LHP7	A0A498MM59		A0A498LHP7		A0A498N6P7		RXN02802.1	A0A498L309		24.6925	1						A0A498N6P7
	A0A498MI27	A0A498NKP3		A0A498MI27		A0A498LB17		RXN03003.1	A0A498L6E5		29.4771	1						A0A498LB17
	A0A498NQY9	A0A498MTB1		A0A498NQY9		A0A498MZD1		RXN03789.1	A0A498L6B4	30.386	35.0933	0						A0A498MZD1
	A0A498N6P7	A0A498NKE3		A0A498N6P7		A0A498LC85		RXN03809.1	A0A498L6D0		24.2258	1						A0A498LC85
	A0A498LB17	A0A498MW09		A0A498LB17		A0A498MMK2		RXN04395.1	A0A498LG55		24.6848	1						A0A498MMK2
	A0A498MZD1	A0A498NZY2		A0A498MZD1		A0A498N3G7		RXN04540.1	A0A498L885	21.9492	25.9509	0						A0A498N3G7
	A0A498LC85	A0A498NXY1		A0A498LC85		A0A498M5Q7		RXN06234.1	A0A498LHU4		26.7692	1						A0A498M5Q7
	A0A498MMK2	A0A498NK32		A0A498MMK2		A0A498MNQ8		RXN06848.1	A0A498MYT1	23.4767	23.2492	0						A0A498MNQ8
	A0A498N3G7	A0A498MJQ9		A0A498N3G7		A0A498NPZ7		RXN06875.1	A0A498LND3		28.4925	1						A0A498NPZ7
	A0A498M5Q7	A0A498LB06		A0A498M5Q7		A0A498L6I4		RXN06988.1	A0A498LGH2		23.5779	1						A0A498L6I4
	A0A498MNQ8	A0A498MJV5		A0A498MNQ8		A0A498M1Q4		RXN07072.1	A0A498NG15	22.9191	22.1719	0						A0A498M1Q4
	A0A498NPZ7	A0A498M939		A0A498NPZ7		A0A498LIP3		RXN07147.1	A0A498LNL0	26.0413		1						A0A498LIP3
	A0A498L6I4	A0A498MAE5		A0A498L6I4		A0A498N0B1		RXN07188.1	A0A498LFV9	21.8555	25.6935	0						A0A498N0B1
	A0A498M1Q4	A0A498L933		A0A498M1Q4		A0A498LRA6		RXN07256.1	A0A498LJL9		23.7832	1						A0A498LRA6
	A0A498LIP3	A0A498ND70		A0A498LIP3		A0A498NGQ1		RXN07393.1	A0A498LIK7	20.7093		1						A0A498NGQ1
	A0A498N0B1	A0A498LHP7		A0A498N0B1		A0A498N206		RXN07618.1	A0A498LH19	20.8806	23.1528	0						A0A498N206
	A0A498LRA6	A0A498MQG4		A0A498LRA6		A0A498P454		RXN07628.1	A0A498LH28	23.1019	28.2397	0						A0A498P454
	A0A498NGQ1	A0A498MXB4		A0A498NGQ1		A0A498MPI0		RXN08051.1	A0A498L5Z4		22.6373	1						A0A498MPI0
	A0A498N206	A0A498MHT5		A0A498N206		A0A498LGN8		RXN08348.1	A0A498LJ37		24.3311	1						A0A498LGN8
	A0A498P454	A0A498LYK8		A0A498P454		A0A498ND90		RXN08465.1	A0A498LSX0	33.7798	26.4506	0						A0A498ND90
	A0A498MPI0	A0A498NAG5		A0A498MPI0		A0A498MJ33		RXN08466.1	A0A498LN29	32.8381	22.9846	0						A0A498MJ33
	A0A498LGN8	A0A498NIR7		A0A498LGN8		A0A498MT42		RXN08574.1	A0A498LP79	23.7835		1						A0A498MT42
	A0A498ND90	A0A498M0B1		A0A498ND90		A0A498LAI4		RXN08784.1	A0A498LQ08		25.0171	1						A0A498LAI4
	A0A498MJ33	A0A498LQK4		A0A498MJ33		A0A498N790		RXN08805.1	A0A498LTV8	22.8328		1						A0A498N790
	A0A498MT42	A0A498NBE3		A0A498MT42		A0A498MLZ6		RXN08860.1	A0A498LKW4		21.4701	1						A0A498MLZ6
	A0A498LAI4	A0A498NNR1		A0A498LAI4		A0A498NHY4		RXN08879.1	A0A498LKG2		28.8222	1						A0A498NHY4
	A0A498N790	A0A498NVH4		A0A498N790		A0A498N3G4		RXN08898.1	A0A498LKG5		23.3443	1						A0A498N3G4
	A0A498MLZ6	A0A498M9B4		A0A498MLZ6		A0A498LKD8		RXN08988.1	A0A498LKP6		29.9564	1						A0A498LKD8
	A0A498NHY4	A0A498NRK4		A0A498NHY4		A0A498N7U1		RXN09041.1	A0A498LLY9	24.832		1						A0A498N7U1
	A0A498M7X4	A0A498N271		A0A498M7X4		A0A498LAD3		RXN09045.1	A0A498LUR4	23.4893	29.5763	0						A0A498LAD3
	A0A498N3G4	A0A498LTK5		A0A498N3G4		A0A498NCM9		RXN09078.1	A0A498LKZ2		27.7684	1						A0A498NCM9
	A0A498N709	A0A498LPX7		A0A498N709		A0A498NJ42		RXN09109.1	A0A498LL35	24.8017		1						A0A498NJ42
	A0A498LKD8	A0A498MR69		A0A498LKD8		A0A498LJJ7		RXN09135.1	A0A498LV02	23.0664		1						A0A498LJJ7
	A0A498N7U1	A0A498NQY9		A0A498N7U1		A0A498NFZ5		RXN09444.1	A0A498LRS5	23.0261		1						A0A498NFZ5
	A0A498LAD3	A0A498N6P7		A0A498LAD3		A0A498LLF6		RXN09450.1	A0A498LMS0		23.0241	1						A0A498LLF6
	A0A498NCM9	A0A498MJ94		A0A498NCM9		A0A498NQF9		RXN09453.1	A0A498LP98	27.1362	27.2695	0						A0A498NQF9
	A0A498NJ42	A0A498LB17		A0A498NJ42		A0A498MSV3		RXN09457.1	A0A498LVW9		25.2745	1						A0A498MSV3
	A0A498LJJ7	A0A498MZD1		A0A498LJJ7		A0A498NRF7		RXN09704.1	A0A498LSJ7	27.1724	32.2604	0						A0A498NRF7
	A0A498NFZ5	A0A498LC85		A0A498NFZ5		A0A498MZB2		RXN09780.1	A0A498LNP9	23.9445		1						A0A498MZB2
	A0A498LLF6	A0A498MMK2		A0A498LLF6		A0A498NBZ6		RXN10030.1	A0A498LPD4	25.8382	30.9817	0						A0A498NBZ6
	A0A498NQF9	A0A498N3G7		A0A498NQF9		A0A498N668		RXN10296.1	A0A498LT47		27.3376	1						A0A498N668
	A0A498MSV3	A0A498MCP4		A0A498MSV3		A0A498NSH5		RXN10441.1	A0A498LQR8	27.7443	21.7395	0						A0A498NSH5
	A0A498NRF7	A0A498MJ13		A0A498NRF7		A0A498LY90		RXN11014.1	A0A498LVY2		20.7276	1						A0A498LY90
	A0A498MZB2	A0A498M5Q7		A0A498MZB2		A0A498N908		RXN12124.1	A0A498LZ12		19.5079	1						A0A498N908
	A0A498NBZ6	A0A498MN14		A0A498NBZ6		A0A498LE46		RXN12152.1	A0A498NNR1		24.7884	1						A0A498LE46
	A0A498N668	A0A498L6I4		A0A498N668		A0A498MQ47		RXN12605.1	A0A498MKV7		25.8804	1						A0A498MQ47
	A0A498NSH5	A0A498M1Q4		A0A498NSH5		A0A498LPV0		RXN12856.1	A0A498M061	25.2023		1						A0A498LPV0
	A0A498LY90	A0A498NRS4		A0A498LY90		A0A498LTS6		RXN13445.1	A0A498M722		22.4578	1						A0A498LTS6
	A0A498N908	A0A498LIP3		A0A498N908		A0A498L7I0		RXN13535.1	A0A498M7B3	24.8413	22.6055	0						A0A498L7I0
	A0A498LE46	A0A498N0B1		A0A498LE46		A0A498L5L0		RXN13861.1	A0A498M013	27.1362		1						A0A498L5L0
	A0A498MQ47	A0A498LRA6		A0A498MQ47		A0A498NT03		RXN14076.1	A0A498M3M7		25.6977	1						A0A498NT03
	A0A498LPV0	A0A498M073		A0A498LPV0		A0A498MSC1		RXN14302.1	A0A498N2N7		28.7742	1						A0A498MSC1
	A0A498LTS6	A0A498MPI0		A0A498LTS6		A0A498L6M3		RXN14351.1	A0A498M1C4		32.5418	1						A0A498L6M3
	A0A498L7I0	A0A498LGN8		A0A498L7I0		A0A498LA53		RXN14927.1	A0A498MCX4		26.7446	1						A0A498LA53
	A0A498L5L0	A0A498ND90		A0A498L5L0		A0A498NRP5		RXN15431.1	A0A498M4F3	21.7401	21.9047	0						A0A498NRP5
	A0A498NT03	A0A498MT42		A0A498NT03		A0A498NAG5		RXN15486.1	A0A498M7Q2		26.4212	1						A0A498NAG5
	A0A498MSC1	A0A498LRM7		A0A498MSC1		A0A498LYK8		RXN15666.1	A0A498M894		24.4005	1						A0A498LYK8
	A0A498L6M3	A0A498N790		A0A498L6M3		A0A498MXB4		RXN15824.1	A0A498P559	24.9642		1						A0A498MXB4
	A0A498LA53	A0A498N4M9		A0A498LA53		A0A498MI78		RXN15865.1	A0A498MEF2		25.6869	1						A0A498MI78
	A0A498NRP5	A0A498M7X4		A0A498NRP5		A0A498NJ99		RXN16185.1	A0A498MFB9	24.2065	23.8133	0						A0A498NJ99
	A0A498NAG5	A0A498N3G4		A0A498NAG5		A0A498MJS7		RXN16281.1	A0A498M6M7	32.1312	37.3776	0						A0A498MJS7
	A0A498LYK8	A0A498N709		A0A498LYK8		A0A498MH78		RXN16731.1	A0A498M7U6	23.2479	24.077	0						A0A498MH78
	A0A498MXB4	A0A498LKD8		A0A498MXB4		A0A498NPL1		RXN16812.1	A0A498MBJ8	35.9203	28.58	0						A0A498NPL1
	A0A498MI78	A0A498N7U1		A0A498MI78		A0A498MIE0		RXN16848.1	A0A498LDK9	24.8732		1						A0A498MIE0
	A0A498NQS2	A0A498LAD3		A0A498NQS2		A0A498M7U6		RXN16976.1	A0A498MCZ8	31.3451		1						A0A498M7U6
	A0A498NJ99	A0A498NCM9		A0A498NJ99		A0A498L2H9		RXN17671.1	A0A498MA59	26.7049		1						A0A498L2H9
	A0A498MJS7	A0A498LJJ7		A0A498MJS7		A0A498LDI3		RXN17674.1	A0A498LRG0	22.3605		1						A0A498LDI3
	A0A498MH78	A0A498NJ42		A0A498MH78		A0A498L8F9		RXN17717.1	A0A498ML75		21.3268	1						A0A498L8F9
	A0A498NPL1	A0A498N6E6		A0A498NPL1		A0A498MFQ9		RXN17885.1	A0A498MKV1	26.3931		1						A0A498MFQ9
	A0A498MIE0	A0A498LLF6		A0A498MIE0		A0A498NBP1		RXN18107.1	A0A498MM76		30.2745	1						A0A498NBP1
	A0A498M7U6	A0A498MSV3		A0A498M7U6		A0A498N6M3		RXN18274.1	A0A498MFX3		28.0375	1						A0A498N6M3
	A0A498L2H9	A0A498NRF7		A0A498L2H9		A0A498MKW9		RXN18294.1	A0A498MFZ2	20.9785		1						A0A498MKW9
	A0A498LDI3	A0A498MZB2		A0A498LDI3		A0A498LVZ1		RXN18544.1	A0A498MGN9	25.6936	27.9119	0						A0A498LVZ1
	A0A498L8F9	A0A498NBZ6		A0A498L8F9		A0A498P2C4		RXN18894.1	A0A498MHR7	22.7728		1						A0A498P2C4
	A0A498MFQ9	A0A498N668		A0A498MFQ9		A0A498LX98		RXN18992.1	A0A498MHV8		24.0762	1						A0A498LX98
	A0A498NBP1	A0A498NSH5		A0A498NBP1		A0A498NJ74		RXN19075.1	A0A498MPS8	23.0778	26.6083	0						A0A498NJ74
	A0A498N6M3	A0A498LY90		A0A498N6M3		A0A498NKL6		RXN19485.1	A0A498MR07		23.3933	1						A0A498NKL6
	A0A498MKW9	A0A498LE46		A0A498MKW9		A0A498LI09		RXN19621.1	A0A498MEZ4		30.6644	1						A0A498LI09
	A0A498LVZ1	A0A498MQ47		A0A498LVZ1		A0A498LPT3		RXN19711.1	A0A498MF96		25.7921	1						A0A498LPT3
	A0A498P2C4	A0A498NRX4		A0A498P2C4		A0A498MHP7		RXN19923.1	A0A498MJF6	31.7673	28.5116	0						A0A498MHP7
	A0A498LX98	A0A498LPV0		A0A498LX98		A0A498MZL4		RXN19934.1	A0A498MKR7		25.1356	1						A0A498MZL4
	A0A498NJ74	A0A498LTS6		A0A498NJ74		A0A498NJV9		RXN20233.1	A0A498LES4		26.2265	1						A0A498NJV9
	A0A498NKL6	A0A498L7I0		A0A498NKL6		A0A498NQ95		RXN20371.1	A0A498MGY9	21.9554	23.8477	0						A0A498NQ95
	A0A498LI09	A0A498L5L0		A0A498LI09		A0A498M763		RXN20653.1	A0A498MLI5		29.4831	1						A0A498M763
	A0A498LPT3	A0A498NT03		A0A498LPT3		A0A498L9S6		RXN20956.1	A0A498MQW6	21.5122	24.2666	0						A0A498L9S6
	A0A498MHP7	A0A498MSC1		A0A498MHP7		A0A498MVU2		RXN20966.1	A0A498MQX8	27.2463	28.1073	0						A0A498MVU2
	A0A498MZL4	A0A498L6M3		A0A498MZL4		A0A498MR96		RXN21167.1	A0A498MWT1	33.6387	37.762	0						A0A498MR96
	A0A498NJV9	A0A498LA53		A0A498NJV9		A0A498NGU3		RXN21182.1	A0A498MNJ6	24.0604	23.891	0						A0A498NGU3
	A0A498NQ95	A0A498NRP5		A0A498NQ95		A0A498M5K6		RXN21205.1	A0A498MX24	21.4948	24.4663	0						A0A498M5K6
	A0A498M763	A0A498NJ99		A0A498M763		A0A498NUZ4		RXN21476.1	A0A498MSR0	32.6044	26.7769	0						A0A498NUZ4
	A0A498L9S6	A0A498NPH6		A0A498L9S6		A0A498NWT4		RXN21569.1	A0A498MJT4		25.7988	1						A0A498NWT4
	A0A498MVU2	A0A498MYE8		A0A498MVU2		A0A498N7A4		RXN21644.1	A0A498LJH4	24.4702	22.4269	0						A0A498N7A4
	A0A498MR96	A0A498MJS7		A0A498MR96		A0A498LU25		RXN21667.1	A0A498MYT5	25.9073	26.9501	0						A0A498LU25
	A0A498NGU3	A0A498MH78		A0A498NGU3		A0A498NFF7		RXN21954.1	A0A498MRJ0		24.9452	1						A0A498NFF7
	A0A498M5K6	A0A498NPL1		A0A498M5K6		A0A498MQZ9		RXN22223.1	A0A498MQW9		22.8823	1						A0A498MQZ9
	A0A498NUZ4	A0A498MIE0		A0A498NUZ4		A0A498L5W8		RXN22301.1	A0A498LMT8		34.0779	1						A0A498L5W8
	A0A498NWT4	A0A498LXI4		A0A498NWT4		A0A498MS09		RXN22539.1	A0A498MM78	23.0768		1						A0A498MS09
	A0A498N7A4	A0A498NHZ1		A0A498N7A4		A0A498LAB9		RXN22589.1	A0A498MMB3		20.6728	1						A0A498LAB9
	A0A498LU25	A0A498M7U6		A0A498LU25		A0A498M0Z1		RXN22600.1	A0A498MQF4	24.3329	28.3942	0						A0A498M0Z1
	A0A498NFF7	A0A498LDI3		A0A498NFF7		A0A498LEU6		RXN22683.1	A0A498MS40		25.1836	1						A0A498LEU6
	A0A498MQZ9	A0A498L2H9		A0A498MQZ9		A0A498MTN2		RXN23456.1	A0A498LAC3		24.5643	1						A0A498MTN2
	A0A498L5W8	A0A498MFQ9		A0A498L5W8		A0A498MHD6		RXN23744.1	A0A498MW86	25.4317		1						A0A498MHD6
	A0A498MS09	A0A498L8F9		A0A498MS09		A0A498MD61		RXN24289.1	A0A498MRN1	24.6961	27.8848	0						A0A498MD61
	A0A498LAB9	A0A498NBP1		A0A498LAB9		A0A498N6E6		RXN24560.1	A0A498MV07		20.4673	1						A0A498N6E6
	A0A498M0Z1	A0A498LNH8		A0A498M0Z1		A0A498NTK4		RXN24759.1	A0A498MSR7		24.0869	1						A0A498NTK4
	A0A498LEU6	A0A498MYM2		A0A498LEU6		A0A498NIT8		RXN25332.1	A0A498N0M1	24.6026	27.3908	0						A0A498NIT8
	A0A498MTN2	A0A498NJ74		A0A498MTN2		A0A498NQG1		RXN25503.1	A0A498LDW3	25.0941	25.7348	0						A0A498NQG1
	A0A498MHD6	A0A498NKL6		A0A498MHD6		A0A498MG49		RXN25969.1	A0A498MVB9		28.5667	1						A0A498MG49
	A0A498MD61	A0A498LI09		A0A498MD61		A0A498NQZ7		RXN26202.1	A0A498N304		23.8533	1						A0A498NQZ7
	A0A498N6E6	A0A498MMJ7		A0A498N6E6		A0A498MSB3		RXN26245.1	A0A498NAP9	22.5963		1						A0A498MSB3
	A0A498NTK4	A0A498NQ95		A0A498NTK4		A0A498NHX3		RXN26694.1	A0A498N4V0	24.1811	26.4919	0						A0A498NHX3
	A0A498NIT8	A0A498M763		A0A498NIT8		A0A498LQK2		RXN26979.1	A0A498MY69		27.2517	1						A0A498LQK2
	A0A498NQG1	A0A498L9S6		A0A498NQG1		A0A498MZV4		RXN27083.1	A0A498N4F1	25.6146		1						A0A498MZV4
	A0A498MG49	A0A498MVU2		A0A498MG49		A0A498P389		RXN27139.1	A0A498LMQ4	22.2094		1						A0A498P389
	A0A498NQZ7	A0A498NGU3		A0A498NQZ7		A0A498M8C3		RXN27190.1	A0A498N2C4	24.1448	26.7063	0						A0A498M8C3
	A0A498MSB3	A0A498M5K6		A0A498MSB3		A0A498NM83		RXN27194.1	A0A498N670	24.7764	20.6504	0						A0A498NM83
	A0A498NHX3	A0A498MM11		A0A498NHX3		A0A498NQT4		RXN27456.1	A0A498N9S3	22.5722		1						A0A498NQT4
	A0A498LQK2	A0A498NUZ4		A0A498LQK2		A0A498MGP6		RXN27929.1	A0A498N0X0	23.5544	27.8148	0						A0A498MGP6
	A0A498MZV4	A0A498M6D2		A0A498MZV4		A0A498N4M9		RXN28239.1	A0A498N1R9	21.9307		1						A0A498N4M9
	A0A498LEP5	A0A498MVZ4		A0A498LEP5		A0A498P3P8		RXN28370.1	A0A498N5P4	24.6494	29.3237	0						A0A498P3P8
	A0A498P389	A0A498LA35		A0A498P389		A0A498LVN5		RXN28433.1	A0A498N898	21.857	24.9743	0						A0A498LVN5
	A0A498M8C3	A0A498MTC9		A0A498M8C3		A0A498MKB6		RXN28461.1	A0A498N6K7	23.0028	25.0884	0						A0A498MKB6
	A0A498NM83	A0A498LU25		A0A498NM83		A0A498M2R0		RXN28484.1	A0A498N9U1		27.5905	1						A0A498M2R0
	A0A498NQT4	A0A498NFF7		A0A498NQT4		A0A498NRY0		RXN28820.1	A0A498N6X4	30.672	35.1506	0						A0A498NRY0
	A0A498MGP6	A0A498MQZ9		A0A498MGP6		A0A498MMJ7		RXN28866.1	A0A498NCS2	25.7479	31.8279	0						A0A498MMJ7
	A0A498N4M9	A0A498N4I9		A0A498N4M9		A0A498NAE7		RXN29143.1	A0A498N9W8	23.8336	24.5544	0						A0A498NAE7
	A0A498P3P8	A0A498NHU8		A0A498P3P8		A0A498MS99		RXN29246.1	A0A498NDC8	24.7326		1						A0A498MS99
	A0A498LVN5	A0A498MFQ8		A0A498LVN5		A0A498ME38		RXN29382.1	A0A498NBP1		24.8528	1						A0A498ME38
	A0A498MKB6	A0A498N164		A0A498MKB6		A0A498LDA5		RXN29778.1	A0A498N6L6	24.5528		1						A0A498LDA5
	A0A498M2R0	A0A498LTG0		A0A498M2R0		A0A498NLX8		RXN29789.1	A0A498N5V9	22.3791	24.2468	0						A0A498NLX8
	A0A498NRY0	A0A498M9S8		A0A498NRY0		A0A498LUC6		RXN29828.1	A0A498N6R0	27.1667		1						A0A498LUC6
	A0A498MMJ7	A0A498LV45		A0A498MMJ7		A0A498LWK8		RXN29873.1	A0A498NBJ2		23.7057	1						A0A498LWK8
	A0A498NAE7	A0A498LIL1		A0A498NAE7		A0A498NMG8		RXN30307.1	A0A498NFK4	26.2468		1						A0A498NMG8
	A0A498MS99	A0A498ND79		A0A498MS99		A0A498LY18		RXN30320.1	A0A498NB00	24.002		1						A0A498LY18
	A0A498ME38	A0A498LAB9		A0A498ME38		A0A498NT58		RXN30374.1	A0A498NDJ2		22.9142	1						A0A498NT58
	A0A498LDA5	A0A498M0Z1		A0A498LDA5		A0A498NGB1		RXN30393.1	A0A498NCF8	22.8944	24.6819	0						A0A498NGB1
	A0A498NLX8	A0A498LEU6		A0A498NLX8		A0A498P430		RXN30428.1	A0A498N8C1	22.2533	24.9399	0						A0A498P430
	A0A498LUC6	A0A498N369		A0A498LUC6		A0A498LA35		RXN30490.1	A0A498NBF4	27.1705		1						A0A498LA35
	A0A498LWK8	A0A498MHD6		A0A498LWK8		A0A498MQG4		RXN30502.1	A0A498NDH4		30.5043	1						A0A498MQG4
	A0A498NMG8	A0A498MJZ1		A0A498NMG8		A0A498MHT5		RXN30524.1	A0A498NDR4	28.6725	28.0916	0						A0A498MHT5
	A0A498LY18	A0A498MD61		A0A498LY18		A0A498LPL3		RXN30647.1	A0A498NFQ9		24.2448	1						A0A498LPL3
	A0A498NT58	A0A498MW07		A0A498NT58		A0A498NRI4		RXN31424.1	A0A498NI48		19.7885	1						A0A498NRI4
	A0A498NGB1	A0A498NHY4		A0A498NGB1		A0A498NES3		RXN31601.1	A0A498NID7	24.8883		1						A0A498NES3
	A0A498P430	A0A498NTK4		A0A498P430		A0A498LM82		RXN31646.1	A0A498LGP6	29.2129	21.7958	0						A0A498LM82
	A0A498LA35	A0A498MG49		A0A498LA35		A0A498LLJ4		RXN31754.1	A0A498NJ80	25.3293	29.0533	0						A0A498LLJ4
	A0A498MQG4	A0A498NQZ7		A0A498MQG4		A0A498NKF8		RXN31837.1	A0A498NJK9	24.076		1						A0A498NKF8
	A0A498MHT5	A0A498MTD2		A0A498MHT5		A0A498N924		RXN31970.1	A0A498NJ56		24.1359	1						A0A498N924
	A0A498LPL3	A0A498N9B8		A0A498LPL3		A0A498N9L1		RXN31973.1	A0A498NJD5	21.2622	25.9367	0						A0A498N9L1
	A0A498NRI4	A0A498LQK2		A0A498NRI4		A0A498LBV9		RXN32288.1	A0A498NKE7		23.9115	1						A0A498LBV9
	A0A498NES3	A0A498LVL4		A0A498NES3		A0A498NGI1		RXN32532.1	A0A498NKS2		24.1651	1						A0A498NGI1
	A0A498LM82	A0A498LEP5		A0A498LM82		A0A498MV30		RXN32720.1	A0A498NL83	22.7806	29.9897	0						A0A498MV30
	A0A498LLJ4	A0A498MZV4		A0A498LLJ4		A0A498L6W4		RXN33371.1	A0A498NNH4	26.3083		1						A0A498L6W4
	A0A498NKF8	A0A498P5Y7		A0A498NKF8		A0A498M6Y5		RXN33380.1	A0A498NMY4		21.3346	1						A0A498M6Y5
	A0A498N924	A0A498M8C3		A0A498N924		A0A498NMU3		RXN33473.1	A0A498NNJ3		20.7839	1						A0A498NMU3
	A0A498N9L1	A0A498MW77		A0A498N9L1		A0A498MI20		RXN33531.1	A0A498NNY5		24.7656	1						A0A498MI20
	A0A498LBV9	A0A498NM83		A0A498LBV9		A0A498MQX0		RXN33695.1	A0A498NP39	21.5628	20.2869	0						A0A498MQX0
	A0A498NGI1	A0A498NQT4		A0A498NGI1		A0A498N294		RXN33773.1	A0A498LJ32	21.1775	23.2112	0						A0A498N294
	A0A498MV30	A0A498N459		A0A498MV30		A0A498N7W1		RXN33806.1	A0A498NPV2		19.4859	1						A0A498N7W1
	A0A498L6W4	A0A498LVN5		A0A498L6W4		A0A498NWS5		RXN34050.1	A0A498NPQ7	34.6464	27.8099	0						A0A498NWS5
	A0A498M6Y5	A0A498MKB6		A0A498M6Y5		A0A498N2N2		RXN34230.1	A0A498NQ95		26.0195	1						A0A498N2N2
	A0A498NMU3	A0A498LWH6		A0A498NMU3		A0A498LU01		RXN34665.1	A0A498NRT4	33.5116	38.0033	0						A0A498LU01
	A0A498MI20	A0A498NRY0		A0A498MI20		A0A498NET5		RXN34715.1	A0A498NRX9	24.1105	22.4077	0						A0A498NET5
	A0A498MQX0	A0A498NAE7		A0A498MQX0		A0A498MJV6		RXN34790.1	A0A498NRT8		25.4785	1						A0A498MJV6
	A0A498N294	A0A498MS99		A0A498N294		A0A498NBJ4		RXN34800.1	A0A498NRU8	21.2027		1						A0A498NBJ4
	A0A498N7W1	A0A498LMW5		A0A498N7W1		A0A498MAF0		RXN35209.1	A0A498NUD0	20.7815		1						A0A498MAF0
	A0A498NWS5	A0A498ME38		A0A498NWS5		A0A498LAH2		RXN35293.1	A0A498NTK6		24.8275	1						A0A498LAH2
	A0A498N2N2	A0A498LWK8		A0A498N2N2		A0A498LZD2		RXN35488.1	A0A498NUT5		25.0814	1						A0A498LZD2
	A0A498LU01	A0A498LDA5		A0A498LU01		A0A498N662		RXN35808.1	A0A498NVP3	24.8861	29.4201	0						A0A498N662
	A0A498NET5	A0A498NLX8		A0A498NET5		A0A498NPB6		RXN37697.1	A0A498P2N4		24.6464	1						A0A498NPB6
	A0A498MJV6	A0A498LUC6		A0A498MJV6		A0A498LHF1		RXN38412.1	A0A498P1C8		26.6278	1						A0A498LHF1
	A0A498NBJ4	A0A498NMG8		A0A498NBJ4		A0A498LJU3		RXN38475.1	A0A498N9H2	23.9321		1						A0A498LJU3
	A0A498MAF0	A0A498N6U6		A0A498MAF0		A0A498L5H4		RXN38803.1	A0A498P3M8		17.3356	1						A0A498L5H4
	A0A498LAH2	A0A498MXE0		A0A498LAH2		A0A498NBE6		RXN39219.1	A0A498P6B7	21.9408		1						A0A498NBE6
	A0A498LZD2	A0A498NFQ5		A0A498LZD2		A0A498LQK9		RXN03138.1	A0A498L4V5	23.5137	27.8921	0						A0A498LQK9
	A0A498N662	A0A498P430		A0A498N662		A0A498NVH4		RXN03418.1	A0A498L5N9	25.3092		1						A0A498NVH4
	A0A498NPB6	A0A498LPL3		A0A498NPB6		A0A498MC44		RXN03489.1	A0A498L5I4	23.3358		1						A0A498MC44
	A0A498LHF1	A0A498NRI4		A0A498LHF1		A0A498NBX9		RXN03681.1	A0A498L5N0		25.8079	1						A0A498NBX9
	A0A498LJU3	A0A498LAX4		A0A498LJU3		A0A498M0B1		RXN04013.1	A0A498L9H1		27.1891	1						A0A498M0B1
	A0A498L5H4	A0A498LM82		A0A498L5H4		A0A498LVV3		RXN04545.1	A0A498LGK7	21.5206		1						A0A498LVV3
	A0A498NBE6	A0A498LLJ4		A0A498NBE6		A0A498NVU8		RXN04840.1	A0A498L907	25.3196	29.0629	0						A0A498NVU8
	A0A498LQK9	A0A498NKF8		A0A498LQK9		A0A498NBG2		RXN05150.1	A0A498L9W6		22.8554	1						A0A498NBG2
	A0A498NVH4	A0A498N924		A0A498NVH4		A0A498NQL0		RXN05277.1	A0A498LHT3		25.7994	1						A0A498NQL0
	A0A498MC44	A0A498MZP1		A0A498MC44		A0A498MVB5		RXN05587.1	A0A498LIU8	25.6861	27.9926	0						A0A498MVB5
	A0A498NBX9	A0A498LBV9		A0A498NBX9		A0A498NIW6		RXN05963.1	A0A498LES5	23.6202		1						A0A498NIW6
	A0A498M0B1	A0A498NAS7		A0A498M0B1		A0A498N8D7		RXN06131.1	A0A498LCZ3		23.2509	1						A0A498N8D7
	A0A498LVV3	A0A498NGI1		A0A498LVV3		A0A498MB05		RXN06148.1	A0A498LD23	25.0354	20.9735	0						A0A498MB05
	A0A498NVU8	A0A498MZL4		A0A498NVU8		A0A498LPD4		RXN06229.1	A0A498M036		24.7742	1						A0A498LPD4
	A0A498NBG2	A0A498MI20		A0A498NBG2		A0A498NAX1		RXN07641.1	A0A498LHT9		32.3283	1						A0A498NAX1
	A0A498NQL0	A0A498N294		A0A498NQL0		A0A498NGW6		RXN07655.1	A0A498LQL3		23.1384	1						A0A498NGW6
	A0A498MVB5	A0A498NWS5		A0A498MVB5		A0A498NNG8		RXN07678.1	A0A498LH92		27.7022	1						A0A498NNG8
	A0A498NIW6	A0A498LWR2		A0A498NIW6		A0A498MQC4		RXN08005.1	A0A498LRL9		22.6573	1						A0A498MQC4
	A0A498N8D7	A0A498NAG9		A0A498N8D7		A0A498N7K0		RXN08564.1	A0A498LP65		23.2808	1						A0A498N7K0
	A0A498MB05	A0A498LS48		A0A498MB05		A0A498LA40		RXN08796.1	A0A498LP04	20.3032		1						A0A498LA40
	A0A498LPD4	A0A498N4G1		A0A498LPD4		A0A498NFE0		RXN08947.1	A0A498LU52		26.8878	1						A0A498NFE0
	A0A498NAX1	A0A498NET5		A0A498NAX1		A0A498NZA3		RXN09283.1	A0A498LNT9	23.3126	23.3536	0						A0A498NZA3
	A0A498NGW6	A0A498NBJ4		A0A498NGW6		A0A498LS35		RXN09303.1	A0A498LNV6	26.4938	26.1426	0						A0A498LS35
	A0A498NNG8	A0A498MDU5		A0A498NNG8		A0A498MUQ6		RXN09403.1	A0A498LP47	21.5152	28.4533	0						A0A498MUQ6
	A0A498MQC4	A0A498NRF0		A0A498MQC4		A0A498NQC1		RXN09406.1	A0A498LQL6	25.5521	28.0733	0						A0A498NQC1
	A0A498N7K0	A0A498LSF8		A0A498N7K0		A0A498NJC5		RXN09436.1	A0A498LQQ0		22.4134	1						A0A498NJC5
	A0A498LA40	A0A498MAF0		A0A498LA40		A0A498MP51		RXN09589.1	A0A498LMI9	21.1067	22.9304	0						A0A498MP51
	A0A498NFE0	A0A498N6C7		A0A498NFE0		A0A498LV59		RXN10181.1	A0A498LQ15		25.3657	1						A0A498LV59
	A0A498NZA3	A0A498LAH2		A0A498NZA3		A0A498LUM0		RXN10329.1	A0A498LPK2	25.8091	24.696	0						A0A498LUM0
	A0A498LS35	A0A498LZD2		A0A498LS35		A0A498MKX6		RXN10376.1	A0A498LTC8	23.1319		1						A0A498MKX6
	A0A498MUQ6	A0A498N579		A0A498MUQ6		A0A498MML6		RXN10396.1	A0A498LTE7		23.6748	1						A0A498MML6
	A0A498NQC1	A0A498N662		A0A498NQC1		A0A498M8N9		RXN10776.1	A0A498LUI3	20.3584		1						A0A498M8N9
	A0A498NJC5	A0A498LH60		A0A498NJC5		A0A498MUB2		RXN11128.1	A0A498LRQ3	23.135		1						A0A498MUB2
	A0A498MP51	A0A498NPB6		A0A498MP51		A0A498MUZ4		RXN11337.1	A0A498M1V8		22.6454	1						A0A498MUZ4
	A0A498LV59	A0A498LJU3		A0A498LV59		A0A498LV43		RXN11807.1	A0A498M3D1	23.0904		1						A0A498LV43
	A0A498LUM0	A0A498MNQ8		A0A498LUM0		A0A498LZM8		RXN12642.1	A0A498LZ42	25.1458	24.498	0						A0A498LZM8
	A0A498MKX6	A0A498L5H4		A0A498MKX6		A0A498MZU2		RXN12787.1	A0A498M6I3		23.8121	1						A0A498MZU2
	A0A498MML6	A0A498MUB2		A0A498MML6		A0A498N9P2		RXN12849.1	A0A498LWH6		25.6767	1						A0A498N9P2
	A0A498M8N9	A0A498MG41		A0A498M8N9		A0A498MV19		RXN12884.1	A0A498M1D0	25.2245		1						A0A498MV19
	A0A498MUB2	A0A498NA71		A0A498MUB2		A0A498NA51		RXN12976.1	A0A498M0I6	23.9398	22.3223	0						A0A498NA51
	A0A498MUZ4	A0A498M1B8		A0A498MUZ4		A0A498NCE6		RXN13249.1	A0A498LXI9		24.5063	1						A0A498NCE6
	A0A498LV43	A0A498L892		A0A498LV43		A0A498MHL4		RXN13636.1	A0A498LLU7	22.6738	20.563	0						A0A498MHL4
	A0A498LZM8	A0A498MRM7		A0A498LZM8		A0A498NG76		RXN14111.1	A0A498MVA7	24.9212	25.5771	0						A0A498NG76
	A0A498MZU2	A0A498MC44		A0A498MZU2		A0A498MDR7		RXN14359.1	A0A498LRF8	23.8308		1						A0A498MDR7
	A0A498N9P2	A0A498NBX9		A0A498N9P2		A0A498NCC9		RXN14376.1	A0A498M4I9	24.5941	26.9221	0						A0A498NCC9
	A0A498MV19	A0A498NBG2		A0A498MV19		A0A498LLT9		RXN15176.1	A0A498MH08	22.2802	27.1303	0						A0A498LLT9
	A0A498NA51	A0A498NQL0		A0A498NA51		A0A498M9M9		RXN15358.1	A0A498M3C1	21.0647	24.3442	0						A0A498M9M9
	A0A498NCE6	A0A498MVB5		A0A498NCE6		A0A498LVN3		RXN15427.1	A0A498MEI7	23.0729	22.3666	0						A0A498LVN3
	A0A498MHL4	A0A498NIW6		A0A498MHL4		A0A498LN61		RXN15438.1	A0A498M3K3	27.2688		1						A0A498LN61
	A0A498NG76	A0A498N8D7		A0A498NG76		A0A498NTC7		RXN15637.1	A0A498MF43		26.5806	1						A0A498NTC7
	A0A498MDR7	A0A498MB05		A0A498MDR7		A0A498LYB8		RXN15800.1	A0A498M5K6	22.5636	28.1178	0						A0A498LYB8
	A0A498NCC9	A0A498NPD4		A0A498NCC9		A0A498M5H6		RXN16288.1	A0A498M5W8	24.2567	26.4247	0						A0A498M5H6
	A0A498LLT9	A0A498LL47		A0A498LLT9		A0A498N6J0		RXN16422.1	A0A498MAI2	24.9147	26.0914	0						A0A498N6J0
	A0A498M9M9	A0A498MZ21		A0A498M9M9		A0A498MF83		RXN16429.1	A0A498M698		22.0038	1						A0A498MF83
	A0A498LVN3	A0A498LPD4		A0A498LVN3		A0A498LJ54		RXN16448.1	A0A498M6B2	22.9559	26.7968	0						A0A498LJ54
	A0A498LN61	A0A498NES3		A0A498LN61		A0A498NS73		RXN16642.1	A0A498MB56	27.0464		1						A0A498NS73
	A0A498NTC7	A0A498NAX1		A0A498NTC7		A0A498LGJ5		RXN16724.1	A0A498MBR8		23.4468	1						A0A498LGJ5
	A0A498LYB8	A0A498MQC4		A0A498LYB8		A0A498LWE3		RXN16736.1	A0A498MC88	26.7405	26.3854	0						A0A498LWE3
	A0A498M5H6	A0A498NCD2		A0A498M5H6		A0A498LPZ0		RXN16898.1	A0A498NGY9	24.6154		1						A0A498LPZ0
	A0A498N6J0	A0A498N7K0		A0A498N6J0		A0A498N919		RXN17417.1	A0A498MKC0	23.2404		1						A0A498N919
	A0A498MF83	A0A498LA40		A0A498MF83		A0A498LBK9		RXN17522.1	A0A498MDS8		21.8039	1						A0A498LBK9
	A0A498LJ54	A0A498L925		A0A498LJ54		A0A498N0L6		RXN17645.1	A0A498MK14		22.7862	1						A0A498N0L6
	A0A498NS73	A0A498N046		A0A498NS73		A0A498MJS2		RXN17736.1	A0A498MFI8		26.4913	1						A0A498MJS2
	A0A498LGJ5	A0A498MYK7		A0A498LGJ5		A0A498M1W5		RXN17824.1	A0A498MER8		24.9177	1						A0A498M1W5
	A0A498LWE3	A0A498P2M3		A0A498LWE3		A0A498L8V5		RXN17945.1	A0A498ML13		22.0077	1						A0A498L8V5
	A0A498LPZ0	A0A498LS35		A0A498LPZ0		A0A498MHG1		RXN17998.1	A0A498MAA3	22.2264	26.237	0						A0A498MHG1
	A0A498N919	A0A498MUQ6		A0A498N919		A0A498NNB9		RXN18108.1	A0A498MAJ5		31.823	1						A0A498NNB9
	A0A498LBK9	A0A498M1G8		A0A498LBK9		A0A498MPZ9		RXN18110.1	A0A498MD02		31.5389	1						A0A498MPZ9
	A0A498N0L6	A0A498LV59		A0A498N0L6		A0A498MW39		RXN18193.1	A0A498MEH9		26.0371	1						A0A498MW39
	A0A498MJS2	A0A498MLW3		A0A498MJS2		A0A498LP40		RXN18257.1	A0A498MML6	22.8957	24.8165	0						A0A498LP40
	A0A498M1W5	A0A498LED4		A0A498M1W5		A0A498LHE2		RXN18344.1	A0A498MG41	25.8217	23.3573	0						A0A498LHE2
	A0A498L8V5	A0A498LUM0		A0A498L8V5		A0A498L1W8		RXN18536.1	A0A498MI09	22.2498		1						A0A498L1W8
	A0A498MHG1	A0A498MKX6		A0A498MHG1		A0A498LX53		RXN18994.1	A0A498MI25	23.3715	24.3539	0						A0A498LX53
	A0A498NNB9	A0A498LFL5		A0A498NNB9		A0A498MUI6		RXN19059.1	A0A498MD45		26.2169	1						A0A498MUI6
	A0A498MPZ9	A0A498NB35		A0A498MPZ9		A0A498M1B8		RXN20182.1	A0A498ML07	24.4267	26.6741	0						A0A498M1B8
	A0A498MW39	A0A498MML6		A0A498MW39		A0A498LIH2		RXN20271.1	A0A498MGQ4	21.7932	19.5781	0						A0A498LIH2
	A0A498LP40	A0A498M8N9		A0A498LP40		A0A498MM11		RXN20306.1	A0A498MNR7		28.9564	1						A0A498MM11
	A0A498MDP4	A0A498MUZ4		A0A498MDP4		A0A498N553		RXN20335.1	A0A498MUI7		26.0627	1						A0A498N553
	A0A498LHE2	A0A498LV43		A0A498LHE2		A0A498MWE6		RXN20500.1	A0A498MJW6		24.9929	1						A0A498MWE6
	A0A498L1W8	A0A498NA51		A0A498L1W8		A0A498M105		RXN20602.1	A0A498MM53	24.5796		1						A0A498M105
	A0A498LX53	A0A498MXI8		A0A498LX53		A0A498N2P6		RXN20638.1	A0A498MH76	22.5199	29.4326	0						A0A498N2P6
	A0A498MUI6	A0A498MBG5		A0A498MUI6		A0A498L6A7		RXN20688.1	A0A498MHC7	23.6121		1						A0A498L6A7
	A0A498M1B8	A0A498MHL4		A0A498M1B8		A0A498L5W2		RXN20737.1	A0A498MVB8	20.9681	22.8877	0						A0A498L5W2
	A0A498LIH2	A0A498MDP4		A0A498LIH2		A0A498N951		RXN21348.1	A0A498MJ25		23.9228	1						A0A498N951
	A0A498MM11	A0A498NG76		A0A498MM11		A0A498NJ80		RXN21431.1	A0A498LCW0		23.2144	1						A0A498NJ80
	A0A498N553	A0A498MDR7		A0A498N553		A0A498MH81		RXN21671.1	A0A498MKV5	21.4817	27.5987	0						A0A498MH81
	A0A498MWE6	A0A498N4L7		A0A498MWE6		A0A498L2R3		RXN21720.1	A0A498MN61	28.8129	25.9507	0						A0A498L2R3
	A0A498M105	A0A498LLT9		A0A498M105		A0A498NNW8		RXN21734.1	A0A498MQY5		28.9002	1						A0A498NNW8
	A0A498N2P6	A0A498N2N3		A0A498N2P6		A0A498NZ89		RXN22352.1	A0A498MS09	21.5615		1						A0A498NZ89
	A0A498L6A7	A0A498LD14		A0A498L6A7		A0A498NGD5		RXN22554.1	A0A498MT24	20.6742	26.9968	0						A0A498NGD5
	A0A498L5W2	A0A498MEX2		A0A498L5W2		A0A498N1Z5		RXN22913.1	A0A498MSP6	22.6854		1						A0A498N1Z5
	A0A498N951	A0A498M9M9		A0A498N951		A0A498MIC8		RXN23025.1	A0A498N2E8		21.8118	1						A0A498MIC8
	A0A498NJ80	A0A498NU86		A0A498NJ80		A0A498MBG5		RXN23060.1	A0A498MRK5	23.4747		1						A0A498MBG5
	A0A498MH81	A0A498N0B4		A0A498MH81		A0A498NSK2		RXN23129.1	A0A498MNQ8		25.2439	1						A0A498NSK2
	A0A498L2R3	A0A498LVN3		A0A498L2R3		A0A498MAB6		RXN23309.1	A0A498MP79	22.1157	19.9847	0						A0A498MAB6
	A0A498NNW8	A0A498LFV9		A0A498NNW8		A0A498N9Q6		RXN23365.1	A0A498MD60	24.9505	27.701	0						A0A498N9Q6
	A0A498NZ89	A0A498LN61		A0A498NZ89		A0A498LY23		RXN23388.1	A0A498MPG3	24.725	29.7529	0						A0A498LY23
	A0A498NGD5	A0A498NTC7		A0A498NGD5		A0A498NJ31		RXN24183.1	A0A498MWI2	26.2408		1						A0A498NJ31
	A0A498N1Z5	A0A498LYB8		A0A498N1Z5		A0A498MJY6		RXN24283.1	A0A498N1G4		24.8848	1						A0A498MJY6
	A0A498MIC8	A0A498M2R0		A0A498MIC8		A0A498NKU3		RXN24302.1	A0A498MXI8	23.6612	28.6319	0						A0A498NKU3
	A0A498MBG5	A0A498MWP3		A0A498MBG5		A0A498MYH7		RXN24444.1	A0A498MY47		32.4767	1						A0A498MYH7
	A0A498NSK2	A0A498N6J0		A0A498NSK2		A0A498NJ63		RXN24821.1	A0A498MWH7		26.7447	1						A0A498NJ63
	A0A498MAB6	A0A498NKF0		A0A498MAB6		A0A498MSK4		RXN25155.1	A0A498N890		25.1783	1						A0A498MSK4
	A0A498N9Q6	A0A498MF83		A0A498N9Q6		A0A498NED4		RXN25508.1	A0A498L8Y8	21.8002	24.6518	0						A0A498NED4
	A0A498LY23	A0A498LJ54		A0A498LY23		A0A498NC45		RXN25597.1	A0A498NA53		21.6027	1						A0A498NC45
	A0A498NJ31	A0A498N600		A0A498NJ31		A0A498MU51		RXN25944.1	A0A498N2J8	25.6705		1						A0A498MU51
	A0A498MJY6	A0A498LGJ5		A0A498MJY6		A0A498LTN4		RXN25966.1	A0A498N5Y0		24.8252	1						A0A498LTN4
	A0A498NKU3	A0A498MAG6		A0A498NKU3		A0A498LAT7		RXN26011.1	A0A498MZR4	22.7703		1						A0A498LAT7
	A0A498MYH7	A0A498LWE3		A0A498MYH7		A0A498NI21		RXN26394.1	A0A498N3V2		26.2545	1						A0A498NI21
	A0A498NJ63	A0A498LPZ0		A0A498NJ63		A0A498LRN4		RXN26425.1	A0A498NB24	25.0815	28.5779	0						A0A498LRN4
	A0A498MSK4	A0A498N919		A0A498MSK4		A0A498MW77		RXN26571.1	A0A498N1D0	21.9376		1						A0A498MW77
	A0A498NED4	A0A498LBK9		A0A498NED4		A0A498MNJ6		RXN26760.1	A0A498N127	25.1987		1						A0A498MNJ6
	A0A498NC45	A0A498NPF8		A0A498NC45		A0A498LTT9		RXN26851.1	A0A498N235		32.8518	1						A0A498LTT9
	A0A498MU51	A0A498NZA3		A0A498MU51		A0A498MYG1		RXN26852.1	A0A498N4W3		34.071	1						A0A498MYG1
	A0A498LTN4	A0A498N0L6		A0A498LTN4		A0A498NGC9		RXN26872.1	A0A498N4Y4		28.3496	1						A0A498NGC9
	A0A498LAT7	A0A498NFE0		A0A498LAT7		A0A498LWE7		RXN26889.1	A0A498MXY2	23.7082		1						A0A498LWE7
	A0A498NI21	A0A498NKU3		A0A498NI21		A0A498LLW6		RXN27058.1	A0A498MYK7	26.5497	23.4318	0						A0A498LLW6
	A0A498LRN4	A0A498MHF5		A0A498LRN4		A0A498LED4		RXN27262.1	A0A498N6D1	23.8375	26.7189	0						A0A498LED4
	A0A498MW77	A0A498M7J9		A0A498MW77		A0A498LWM7		RXN27601.1	A0A498N494	23.5362		1						A0A498LWM7
	A0A498MNJ6	A0A498MJS2		A0A498MNJ6		A0A498N8C4		RXN27739.1	A0A498M148	24.9304	27.0014	0						A0A498N8C4
	A0A498LTT9	A0A498L8V5		A0A498LTT9		A0A498LFL5		RXN28064.1	A0A498N8N6		27.2844	1						A0A498LFL5
	A0A498MYG1	A0A498MHG1		A0A498MYG1		A0A498NGD9		RXN28204.1	A0A498N962		24.447	1						A0A498NGD9
	A0A498NGC9	A0A498LMW6		A0A498NGC9		A0A498LL47		RXN28567.1	A0A498NEK3	21.8207		1						A0A498LL47
	A0A498LWE7	A0A498MSU8		A0A498LWE7		A0A498MZ21		RXN28946.1	A0A498NCW8	23.2695		1						A0A498MZ21
	A0A498LLW6	A0A498NNB9		A0A498LLW6		A0A498MHY3		RXN29037.1	A0A498NEW7	23.9105		1						A0A498MHY3
	A0A498LED4	A0A498MPE8		A0A498LED4		A0A498L8U9		RXN29105.1	A0A498NEQ6	23.9765	21.0887	0						A0A498L8U9
	A0A498LWM7	A0A498MBP6		A0A498LWM7		A0A498N8N6		RXN29149.1	A0A498N439	23.9301	25.0152	0						A0A498N8N6
	A0A498N8C4	A0A498LNV7		A0A498N8C4		A0A498NCP1		RXN29581.1	A0A498N9D3		24.2865	1						A0A498NCP1
	A0A498LFL5	A0A498LTN4		A0A498LFL5		A0A498NQC9		RXN30125.1	A0A498NFE0	24.3143	26.761	0						A0A498NQC9
	A0A498NGD9	A0A498NMP8		A0A498NGD9		A0A498LHI8		RXN30493.1	A0A498NCL7	25.6958		1						A0A498LHI8
	A0A498LL47	A0A498NJG1		A0A498LL47		A0A498LIT6		RXN30607.1	A0A498NFQ5		26.008	1						A0A498LIT6
	A0A498MZ21	A0A498MW39		A0A498MZ21		A0A498NKD0		RXN31265.1	A0A498NHE1	23.4279		1						A0A498NKD0
	A0A498MHY3	A0A498LP40		A0A498MHY3		A0A498LY34		RXN31371.1	A0A498NHS7	22.9332		1						A0A498LY34
	A0A498L8U9	A0A498NRK1		A0A498L8U9		A0A498MJQ0		RXN31415.1	A0A498NHU0		24.7728	1						A0A498MJQ0
	A0A498N8N6	A0A498LHE2		A0A498N8N6		A0A498MM09		RXN33057.1	A0A498NNF5	20.6092		1						A0A498MM09
	A0A498NCP1	A0A498NJC5		A0A498NCP1		A0A498LA25		RXN33095.1	A0A498NIK4		23.6601	1						A0A498LA25
	A0A498NQC9	A0A498L1W8		A0A498NQC9		A0A498MY64		RXN33312.1	A0A498NMV3	21.567		1						A0A498MY64
	A0A498LHI8	A0A498MUZ0		A0A498LHI8		A0A498N2D1		RXN33476.1	A0A498NNW8	23.927	23.9922	0						A0A498N2D1
	A0A498LIT6	A0A498N514		A0A498LIT6		A0A498N049		RXN33539.1	A0A498NP91		23.5203	1						A0A498N049
	A0A498NKD0	A0A498N227		A0A498NKD0		A0A498LL89		RXN33651.1	A0A498NPB5	24.3065		1						A0A498LL89
	A0A498LY34	A0A498NT93		A0A498LY34		A0A498LN88		RXN33654.1	A0A498NQ16	23.5139		1						A0A498LN88
	A0A498MJQ0	A0A498N878		A0A498MJQ0		A0A498NJF9		RXN34225.1	A0A498MQ41	21.2989		1						A0A498NJF9
	A0A498MM09	A0A498LHZ9		A0A498MM09		A0A498LWY3		RXN34775.1	A0A498NS36		19.4963	1						A0A498LWY3
	A0A498LA25	A0A498N798		A0A498LA25		A0A498P0P1		RXN34808.1	A0A498NSQ2	24.4131	22.7249	0						A0A498P0P1
	A0A498MY64	A0A498L5W8		A0A498MY64		A0A498LNL0		RXN34902.1	A0A498NS30	22.9449		1						A0A498LNL0
	A0A498N2D1	A0A498LSA7		A0A498N2D1		A0A498MC52		RXN34964.1	A0A498NTU5	37.8844	25.3208	0						A0A498MC52
	A0A498N049	A0A498MS09		A0A498N049		A0A498N4G1		RXN35016.1	A0A498NTM4	36.7427	29.2702	0						A0A498N4G1
	A0A498LL89	A0A498NMH1		A0A498LL89		A0A498LTZ7		RXN35175.1	A0A498NT34	22.7929		1						A0A498LTZ7
	A0A498LN88	A0A498NRW2		A0A498LN88		A0A498LVS6		RXN35585.1	A0A498NUC4	23.1985	21.1761	0						A0A498LVS6
	A0A498NJF9	A0A498LQ23		A0A498NJF9		A0A498LN18		RXN35678.1	A0A498NVC4		25.573	1						A0A498LN18
	A0A498LWY3	A0A498LNH7		A0A498LWY3		A0A498N7E8		RXN36587.1	A0A498NZ12	23.6353	23.7803	0						A0A498N7E8
	A0A498P0P1	A0A498NGC9		A0A498P0P1		A0A498NL71		RXN38031.1	A0A498P1G7		26.6947	1						A0A498NL71
	A0A498LNL0	A0A498LX53		A0A498LNL0		A0A498MPM9		RXN38287.1	A0A498NU75	29.5551	28.4909	0						A0A498MPM9
	A0A498MC52	A0A498NMM5		A0A498MC52		A0A498NS54		RXN38734.1	A0A498P5C7		23.0253	1						A0A498NS54
	A0A498N4G1	A0A498N022		A0A498N4G1		A0A498NML0		RXN39634.1	A0A498P826	21.7709	26.2622	0						A0A498NML0
	A0A498LTZ7	A0A498MUI6		A0A498LTZ7		A0A498LXT1		RXN02842.1	A0A498L347	21.6653		1						A0A498LXT1
	A0A498LVS6	A0A498M3Y7		A0A498LVS6		A0A498LM50		RXN02933.1	A0A498L684		25.0565	1						A0A498LM50
	A0A498LN18	A0A498LIH2		A0A498LN18		A0A498LTM5		RXN03056.1	A0A498L892	27.2994	30.9887	0						A0A498LTM5
	A0A498N7E8	A0A498N553		A0A498N7E8		A0A498N5U1		RXN03089.1	A0A498L4D0	23.5075	25.481	0						A0A498N5U1
	A0A498NL71	A0A498MWE6		A0A498NL71		A0A498NSS4		RXN03787.1	A0A498LDF0		25.275	1						A0A498NSS4
	A0A498MPM9	A0A498M9R9		A0A498MPM9		A0A498LQL6		RXN04399.1	A0A498L7Z4		25.1985	1						A0A498LQL6
	A0A498NS54	A0A498M105		A0A498NS54		A0A498LQ23		RXN04655.1	A0A498LGX1		23.3261	1						A0A498LQ23
	A0A498NML0	A0A498N2P6		A0A498NML0		A0A498MDZ5		RXN05406.1	A0A498N837		24.7351	1						A0A498MDZ5
	A0A498LXT1	A0A498L5W2		A0A498LXT1		A0A498NDI4		RXN05671.1	A0A498LBG1	22.2809		1						A0A498NDI4
	A0A498LM50	A0A498NJ80		A0A498LM50		A0A498LSM2		RXN05860.1	A0A498LC68		23.9354	1						A0A498LSM2
	A0A498LTM5	A0A498MH81		A0A498LTM5		A0A498LXI8		RXN06116.1	A0A498LGH5		22.7652	1						A0A498LXI8
	A0A498N5U1	A0A498N3V2		A0A498N5U1		A0A498LYE1		RXN06266.1	A0A498LGW6		23.3195	1						A0A498LYE1
	A0A498NSS4	A0A498N090		A0A498NSS4		A0A498LP98		RXN06409.1	A0A498LQQ7	25.192	26.9667	0						A0A498LP98
	A0A498LQL6	A0A498MJU4		A0A498LQL6		A0A498N7G9		RXN06705.1	A0A498LMW8	24.5264	24.2952	0						A0A498N7G9
	A0A498LQ23	A0A498LL08		A0A498LQ23		A0A498LIF2		RXN06878.1	A0A498LF16	20.7585	23.9729	0						A0A498LIF2
	A0A498MDZ5	A0A498NJD9		A0A498MDZ5		A0A498NKM0		RXN07264.1	A0A498LKN7	21.2092	26.6013	0						A0A498NKM0
	A0A498NDI4	A0A498NNW8		A0A498NDI4		A0A498NU79		RXN07283.1	A0A498LIA0	28.3142	29.709	0						A0A498NU79
	A0A498LSM2	A0A498N1Z5		A0A498LSM2		A0A498NED7		RXN07533.1	A0A498LJ54	25.5438	27.0923	0						A0A498NED7
	A0A498LXI8	A0A498LVX1		A0A498LXI8		A0A498P307		RXN07730.1	A0A498LHR8	21.9416	25.0558	0						A0A498P307
	A0A498LYE1	A0A498LLQ2		A0A498LYE1		A0A498LJQ3		RXN08842.1	A0A498LM02		22.3725	1						A0A498LJQ3
	A0A498LP98	A0A498LFT0		A0A498LP98		A0A498LRM7		RXN08908.1	A0A498LKH3	22.6446		1						A0A498LRM7
	A0A498N7G9	A0A498MIC8		A0A498N7G9		A0A498N5J3		RXN09156.1	A0A498LPX7		22.8779	1						A0A498N5J3
	A0A498LIF2	A0A498NSK2		A0A498LIF2		A0A498MJ90		RXN09577.1	H9C4W5	23.8461		1						A0A498MJ90
	A0A498NKM0	A0A498MS17		A0A498NKM0		A0A498LJP8		RXN09700.1	A0A498LNI8	27.438	31.4303	0						A0A498LJP8
	A0A498NU79	A0A498MAB6		A0A498NU79		A0A498LRM8		RXN09720.1	A0A498LNJ9		31.8434	1						A0A498LRM8
	A0A498NED7	A0A498NSE5		A0A498NED7		A0A498MLT3		RXN10305.1	A0A498LY31		24.9417	1						A0A498MLT3
	A0A498P307	A0A498N9Q6		A0A498P307		A0A498N5X4		RXN10412.1	A0A498LRS8	26.4003		1						A0A498N5X4
	A0A498LJQ3	A0A498NCC9		A0A498LJQ3		A0A498NB73		RXN10476.1	A0A498LTM7		23.3434	1						A0A498NB73
	A0A498LRM7	A0A498MUR0		A0A498LRM7		A0A498LST9		RXN10573.1	A0A498LSB8		30.3341	1						A0A498LST9
	A0A498N5J3	A0A498LY23		A0A498N5J3		A0A498NBJ0		RXN10741.1	A0A498LRL5	26.2359		1						A0A498NBJ0
	A0A498MJ90	A0A498MJY6		A0A498MJ90		A0A498LAK0		RXN11006.1	A0A498LV52		22.6405	1						A0A498LAK0
	A0A498LJP8	A0A498MYH7		A0A498LJP8		A0A498L8Q0		RXN11031.1	A0A498LSD8	21.4312		1						A0A498L8Q0
	A0A498LRM8	A0A498N4V8		A0A498LRM8		A0A498MS17		RXN11325.1	A0A498M0Z0		24.3399	1						A0A498MS17
	A0A498MLT3	A0A498NJ63		A0A498MLT3		A0A498NLQ0		RXN11354.1	A0A498LWX6		21.9106	1						A0A498NLQ0
	A0A498N5X4	A0A498M116		A0A498N5X4		A0A498NTR3		RXN11696.1	A0A498LWY6		26.7852	1						A0A498NTR3
	A0A498NB73	A0A498MSB3		A0A498NB73		A0A498N5N1		RXN11924.1	A0A498LYI2		21.3644	1						A0A498N5N1
	A0A498LST9	A0A498N1F7		A0A498LST9		A0A498NNW1		RXN12221.1	A0A498LVI3	24.5006	24.9444	0						A0A498NNW1
	A0A498NBJ0	A0A498MEH9		A0A498NBJ0		A0A498MQK3		RXN12342.1	A0A498LY40		25.0952	1						A0A498MQK3
	A0A498LAK0	A0A498NC45		A0A498LAK0		A0A498LTK1		RXN12492.1	A0A498LYL1		24.5397	1						A0A498LTK1
	A0A498L8Q0	A0A498MEF2		A0A498L8Q0		A0A498N7M2		RXN12540.1	A0A498LWH4	23.428	28.9312	0						A0A498N7M2
	A0A498MS17	A0A498LHL4		A0A498MS17		A0A498MQQ1		RXN12864.1	A0A498N4C5	22.3743		1						A0A498MQQ1
	A0A498NLQ0	A0A498LFI9		A0A498NLQ0		A0A498MYA6		RXN14090.1	A0A498M0N2	23.4487		1						A0A498MYA6
	A0A498NTR3	A0A498N9L1		A0A498NTR3		A0A498NT07		RXN14863.1	A0A498M4R5		32.532	1						A0A498NT07
	A0A498N5N1	A0A498NQN9		A0A498N5N1		A0A498MY60		RXN15261.1	A0A498M3Y7	22.3307	26.9562	0						A0A498MY60
	A0A498NNW1	A0A498LNW0		A0A498NNW1		A0A498NJQ8		RXN15597.1	A0A498MEZ9		28.3177	1						A0A498NJQ8
	A0A498MQK3	A0A498MU51		A0A498MQK3		A0A498NR85		RXN15848.1	A0A498M4Q4		24.6225	1						A0A498NR85
	A0A498LTK1	A0A498NS73		A0A498LTK1		A0A498LLB3		RXN16356.1	A0A498MAW6		21.1075	1						A0A498LLB3
	A0A498N7M2	A0A498NT58		A0A498N7M2		A0A498LNQ2		RXN16435.1	A0A498MG49		25.3986	1						A0A498LNQ2
	A0A498MQQ1	A0A498NJV9		A0A498MQQ1		A0A498NQ57		RXN16597.1	A0A498MHW2	20.5896	25.4181	0						A0A498NQ57
	A0A498MYA6	A0A498LYK0		A0A498MYA6		A0A498NQ75		RXN16628.1	A0A498M6V0	22.4931	24.3135	0						A0A498NQ75
	A0A498NT07	A0A498LTT9		A0A498NT07		A0A498NPP4		RXN17171.1	A0A498M8V5	31.366	35.3824	0						A0A498NPP4
	A0A498MY60	A0A498MKR7		A0A498MY60		A0A498LGI2		RXN17180.1	A0A498MA26	23.0431	25.5591	0						A0A498LGI2
	A0A498NJQ8	A0A498LLW6		A0A498NJQ8		A0A498NFX2		RXN17215.1	A0A498MIN0	25.6745	21.9255	0						A0A498NFX2
	A0A498NR85	A0A498MHP7		A0A498NR85		A0A498NNX0		RXN17542.1	A0A498MDU5		27.308	1						A0A498NNX0
	A0A498LLB3	A0A498LZM8		A0A498LLB3		A0A498LGY1		RXN17623.1	A0A498MCU0	23.6081	26.0488	0						A0A498LGY1
	A0A498LNQ2	A0A498MZU2		A0A498LNQ2		A0A498M0T0		RXN17724.1	A0A498MEI4		25.6799	1						A0A498M0T0
	A0A498NQ57	A0A498LWM7		A0A498NQ57		A0A498MTM6		RXN17756.1	A0A498MFK6	25.4888	23.7341	0						A0A498MTM6
	A0A498NQ75	A0A498N8C4		A0A498NQ75		A0A498P559		RXN18204.1	A0A498MFR0		25.6211	1						A0A498P559
	A0A498NPP4	A0A498NYC1		A0A498NPP4		A0A498LEJ3		RXN18362.1	A0A498MG61		24.7476	1						A0A498LEJ3
	A0A498LGI2	A0A498ML40		A0A498LGI2		A0A498NHG3		RXN18363.1	A0A498MEX2	26.1385		1						A0A498NHG3
	A0A498NFX2	A0A498MHR0		A0A498NFX2		A0A498MW15		RXN18406.1	A0A498MHN3		26.4972	1						A0A498MW15
	A0A498NNX0	A0A498NK94		A0A498NNX0		A0A498LBY9		RXN18531.1	A0A498MC65		21.9671	1						A0A498LBY9
	A0A498LGY1	A0A498LKG5		A0A498LGY1		A0A498N4Q6		RXN18596.1	A0A498MI74	26.8413		1						A0A498N4Q6
	A0A498M0T0	A0A498LDW5		A0A498M0T0		A0A498LNM5		RXN18727.1	A0A498MNZ0	25.4392		1						A0A498LNM5
	A0A498MTM6	A0A498MHY3		A0A498MTM6		A0A498M167		RXN18728.1	A0A498MC72	27.8698		1						A0A498M167
	A0A498P559	A0A498L8U9		A0A498P559		A0A498NST9		RXN19036.1	A0A498MJL5		25.4318	1						A0A498NST9
	A0A498LEJ3	A0A498N8N6		A0A498LEJ3		A0A498MBC6		RXN19068.1	A0A498MD26	21.3217	26.2575	0						A0A498MBC6
	A0A498NHG3	A0A498NCP1		A0A498NHG3		A0A498MAY9		RXN19604.1	A0A498L6M4	24.0216	24.0629	0						A0A498MAY9
	A0A498MW15	A0A498LWL0		A0A498MW15		A0A498NE56		RXN19741.1	A0A498MFC2		30.1977	1						A0A498NE56
	A0A498LBY9	A0A498NQC9		A0A498LBY9		A0A498N4V9		RXN19853.1	A0A498MJ92		23.813	1						A0A498N4V9
	A0A498N4Q6	A0A498LHI8		A0A498N4Q6		A0A498LIZ7		RXN19927.1	A0A498MSR1		27.0051	1						A0A498LIZ7
	A0A498LNM5	A0A498MAC2		A0A498LNM5		A0A498N047		RXN20267.1	A0A498MTN2		27.048	1						A0A498N047
	A0A498M167	A0A498LIT6		A0A498M167		A0A498MIF8		RXN20405.1	A0A498MUR5		24.106	1						A0A498MIF8
	A0A498NST9	A0A498NTF6		A0A498NST9		A0A498N899		RXN20561.1	A0A498MHF6		23.1711	1						A0A498N899
	A0A498MBC6	A0A498MJQ0		A0A498MBC6		A0A498LFZ8		RXN20584.1	A0A498MMJ9		23.4391	1						A0A498LFZ8
	A0A498MAY9	A0A498MM09		A0A498MAY9		A0A498MN52		RXN20589.1	A0A498MH29	21.7932	24.3607	0						A0A498MN52
	A0A498NE56	A0A498M9R8		A0A498NE56		A0A498LLS5		RXN20622.1	A0A498MM69	22.6591	26.6793	0						A0A498LLS5
	A0A498N4V9	A0A498MDJ5		A0A498N4V9		A0A498NTE8		RXN20693.1	A0A498MLM8		22.5283	1						A0A498NTE8
	A0A498LIZ7	A0A498LTM7		A0A498LIZ7		A0A498NSX2		RXN20767.1	A0A498MVF0		26.0661	1						A0A498NSX2
	A0A498N047	A0A498L6W4		A0A498N047		A0A498NUL3		RXN20803.1	A0A498MLX4		24.0047	1						A0A498NUL3
	A0A498MIF8	A0A498MV30		A0A498MIF8		A0A498NPK0		RXN21185.1	A0A498MX07	22.2205		1						A0A498NPK0
	A0A498N899	A0A498MM36		A0A498N899		A0A498N2D4		RXN21242.1	A0A498MNP7	24.4002	24.8782	0						A0A498N2D4
	A0A498LFZ8	A0A498LA25		A0A498LFZ8		A0A498L5J2		RXN21576.1	A0A498MT66		24.4584	1						A0A498L5J2
	A0A498MN52	A0A498NIL3		A0A498MN52		A0A498NDZ0		RXN21607.1	A0A498MYE1	23.1492		1						A0A498NDZ0
	A0A498LLS5	A0A498MEA4		A0A498LLS5		A0A498N3E3		RXN21732.1	A0A498MQ20		22.4314	1						A0A498N3E3
	A0A498NTE8	A0A498MKL8		A0A498NTE8		A0A498LIA0		RXN21929.1	A0A498MKR4	24.1894		1						A0A498LIA0
	A0A498NSX2	A0A498LCW4		A0A498NSX2		A0A498LYU8		RXN22210.1	A0A498MPF1	27.0992	25.2247	0						A0A498LYU8
	A0A498NUL3	A0A498LL89		A0A498NUL3		A0A498N3A5		RXN22515.1	A0A498N0V5		25.7256	1						A0A498N3A5
	A0A498NPK0	A0A498MC52		A0A498NPK0		A0A498MG05		RXN22598.1	A0A498MME2	29.171	32.7334	0						A0A498MG05
	A0A498N2D4	A0A498LTZ7		A0A498N2D4		A0A498MXA8		RXN22617.1	A0A498N1F7	27.4442	29.6465	0						A0A498MXA8
	A0A498L5J2	A0A498LN18		A0A498L5J2		A0A498MWF4		RXN23049.1	A0A498MNI0		25.361	1						A0A498MWF4
	A0A498NDZ0	A0A498N7E8		A0A498NDZ0		A0A498L9R3		RXN23396.1	A0A498MYQ5		25.0434	1						A0A498L9R3
	A0A498N3E3	A0A498MZ60		A0A498N3E3		A0A498LP25		RXN23537.1	A0A498N466		24.2889	1						A0A498LP25
	A0A498LIA0	A0A498NL71		A0A498LIA0		A0A498LX76		RXN23812.1	A0A498MW07	23.579	27.3774	0						A0A498LX76
	A0A498LYU8	A0A498MPM9		A0A498LYU8		A0A498N1H4		RXN24737.1	A0A498N7Z4		24.9947	1						A0A498N1H4
	A0A498N3A5	A0A498NS54		A0A498N3A5		A0A498NNV5		RXN24926.1	A0A498N338		27.3799	1						A0A498NNV5
	A0A498MG05	A0A498NML0		A0A498MG05		A0A498LBK2		RXN25409.1	A0A498MU51	24.5416	30.6125	0						A0A498LBK2
	A0A498MXA8	A0A498MLX6		A0A498MXA8		A0A498N5K0		RXN25519.1	A0A498MUD3		26.7632	1						A0A498N5K0
	A0A498MWF4	A0A498P1K8		A0A498MWF4		A0A498ME94		RXN25992.1	A0A498N2D1	23.7153		1						A0A498ME94
	A0A498L9R3	A0A498MMB3		A0A498L9R3		A0A498LKD0		RXN26209.1	A0A498N3S0	24.7267	24.2085	0						A0A498LKD0
	A0A498LP25	A0A498LXT1		A0A498LP25		A0A498NGN0		RXN26282.1	A0A498N383	25.5392		1						A0A498NGN0
	A0A498LX76	A0A498MQ49		A0A498LX76		A0A498MP89		RXN26320.1	A0A498MZQ8	25.8067		1						A0A498MP89
	A0A498N1H4	A0A498LM50		A0A498N1H4		A0A498MSY9		RXN26322.1	A0A498N3C5	27.5059	24.2741	0						A0A498MSY9
	A0A498NNV5	A0A498N7F9		A0A498NNV5		A0A498M5U3		RXN26330.1	A0A498MZS1	25.528	25.3182	0						A0A498M5U3
	A0A498LBK2	A0A498NA39		A0A498LBK2		A0A498LGV3		RXN26517.1	A0A498NC42	24.2055		1						A0A498LGV3
	A0A498N5K0	A0A498LTM5		A0A498N5K0		A0A498NK83		RXN26583.1	A0A498N335		23.8634	1						A0A498NK83
	A0A498ME94	A0A498NSS4		A0A498ME94		A0A498N7X6		RXN26836.1	A0A498N8C7	20.503	24.4026	0						A0A498N7X6
	A0A498LKD0	A0A498LQI3		A0A498LKD0		A0A498M245		RXN27242.1	A0A498LMZ0	23.5504		1						A0A498M245
	A0A498NGN0	A0A498MTW3		A0A498NGN0		A0A498MHH8		RXN27309.1	A0A498MZ16		21.8655	1						A0A498MHH8
	A0A498MP89	A0A498MQ10		A0A498MP89		A0A498N7L7		RXN27461.1	A0A498N3W7	21.6373	22.5894	0						A0A498N7L7
	A0A498MSY9	A0A498NLH3		A0A498MSY9		A0A498MB31		RXN27482.1	A0A498MUT0	23.0288		1						A0A498MB31
	A0A498M5U3	A0A498N1H4		A0A498M5U3		A0A498M6C3		RXN27695.1	A0A498NDB2		22.7238	1						A0A498M6C3
	A0A498LGV3	A0A498N471		A0A498LGV3		A0A498NBE7		RXN27727.1	A0A498NDW3	22.2435		1						A0A498NBE7
	A0A498NK83	A0A498MDZ5		A0A498NK83		A0A498MH64		RXN27951.1	A0A498N584		21.3585	1						A0A498MH64
	A0A498N7X6	A0A498MTB9		A0A498N7X6		A0A498NC80		RXN28059.1	A0A498N195		22.9925	1						A0A498NC80
	A0A498M245	A0A498M0X4		A0A498M245		A0A498N471		RXN28479.1	A0A498N2A3		25.0492	1						A0A498N471
	A0A498MHH8	A0A498NF34		A0A498MHH8		A0A498MPS1		RXN28619.1	A0A498N2N3		26.9854	1						A0A498MPS1
	A0A498N7L7	A0A498NDI4		A0A498N7L7		A0A498LE85		RXN28862.1	A0A498NAK3		28.2851	1						A0A498LE85
	A0A498MB31	A0A498LPN6		A0A498MB31		A0A498NJB6		RXN28879.1	A0A498NT54	28.0149	26.2205	0						A0A498NJB6
	A0A498M6C3	A0A498LSM2		A0A498M6C3		A0A498MUH8		RXN29075.1	A0A498NEP6		26.0542	1						A0A498MUH8
	A0A498NBE7	A0A498LP98		A0A498NBE7		A0A498MG85		RXN29138.1	A0A498N4T4		27.4561	1						A0A498MG85
	A0A498MH64	A0A498N7G9		A0A498MH64		A0A498M1U7		RXN29293.1	A0A498NA79	23.3236	23.9712	0						A0A498M1U7
	A0A498NC80	A0A498LDS4		A0A498NC80		A0A498N4S4		RXN29327.1	A0A498NF23		26.2811	1						A0A498N4S4
	A0A498N471	A0A498MN94		A0A498N471		A0A498MUN0		RXN29357.1	A0A498LST9	23.1445	24.0888	0						A0A498MUN0
	A0A498MPS1	A0A498NKM0		A0A498MPS1		A0A498LDZ5		RXN29468.1	A0A498N5R4	23.5474	24.965	0						A0A498LDZ5
	A0A498LE85	A0A498LIF2		A0A498LE85		A0A498MHV3		RXN29483.1	A0A498NAN4	21.945		1						A0A498MHV3
	A0A498NJB6	A0A498NU79		A0A498NJB6		A0A498L7C3		RXN29528.1	A0A498N5X4	22.7362	23.6441	0						A0A498L7C3
	A0A498MUH8	A0A498P307		A0A498MUH8		A0A498NVD1		RXN29721.1	A0A498N9Q1		26.2648	1						A0A498NVD1
	A0A498MG85	A0A498ME85		A0A498MG85		A0A498N4U7		RXN29748.1	A0A498LRF7	22.3866	23.2603	0						A0A498N4U7
	A0A498M1U7	A0A498LJQ3		A0A498M1U7		A0A498LKP9		RXN30373.1	A0A498NCE6	24.9745		1						A0A498LKP9
	A0A498N4S4	A0A498N5J3		A0A498N4S4		A0A498LQJ3		RXN30747.1	A0A498NG84		25.6158	1						A0A498LQJ3
	A0A498MUN0	A0A498MJ90		A0A498MUN0		A0A498NEL9		RXN31269.1	A0A498NHH1		24.4501	1						A0A498NEL9
	A0A498LDZ5	A0A498LRM8		A0A498LDZ5		A0A498NDF4		RXN31559.1	A0A498NIA6	21.5873	23.3269	0						A0A498NDF4
	A0A498MHV3	A0A498MLT3		A0A498MHV3		A0A498LH99		RXN32025.1	A0A498NJL7		25.8375	1						A0A498LH99
	A0A498L7C3	A0A498LPC1		A0A498L7C3		A0A498MGP7		RXN32291.1	A0A498NKB1		23.2542	1						A0A498MGP7
	A0A498NVD1	A0A498M060		A0A498NVD1		A0A498MFS6		RXN32396.1	A0A498NKU7	22.1344		1						A0A498MFS6
	A0A498N4U7	A0A498N7K4		A0A498N4U7		A0A498MQJ7		RXN32599.1	A0A498NLD2	23.213	28.4052	0						A0A498MQJ7
	A0A498LKP9	A0A498LST9		A0A498LKP9		A0A498MQY5		RXN32773.1	A0A498NLI9	22.386	29.9891	0						A0A498MQY5
	A0A498LQJ3	A0A498MVZ0		A0A498LQJ3		A0A498LIL1		RXN33154.1	A0A498L2F6		26.3462	1						A0A498LIL1
	A0A498NEL9	A0A498N9D3		A0A498NEL9		A0A498LTG0		RXN33308.1	A0A498NNF7		26.2008	1						A0A498LTG0
	A0A498NDF4	A0A498M6L9		A0A498NDF4		A0A498MZR2		RXN33370.1	A0A498NMX4	25.023		1						A0A498MZR2
	A0A498LH99	A0A498LTW5		A0A498LH99		A0A498MVA6		RXN33460.1	A0A498NN55		34.356	1						A0A498MVA6
	A0A498MGP7	A0A498NQS7		A0A498MGP7		A0A498MWH4		RXN34198.1	A0A498NR13	24.3658		1						A0A498MWH4
	A0A498MFS6	A0A498MX73		A0A498MFS6		A0A498MRU3		RXN34495.1	A0A498NRA1	27.3014	27.0005	0						A0A498MRU3
	A0A498MQJ7	A0A498NLQ0		A0A498MQJ7		A0A498LTU4		RXN34594.1	A0A498NSU0		27.6357	1						A0A498LTU4
	A0A498MQY5	A0A498NDW3		A0A498MQY5		A0A498NRS4		RXN34595.1	A0A498NRK1	24.1061	26.1705	0						A0A498NRS4
	A0A498LIL1	A0A498LD75		A0A498LIL1		A0A498MHF6		RXN34733.1	A0A498L4B6	24.2457	27.0119	0						A0A498MHF6
	A0A498LTG0	A0A498NTR3		A0A498LTG0		A0A498NRW6		RXN34963.1	A0A498NSP8	36.3879	28.9977	0						A0A498NRW6
	A0A498MZR2	A0A498N5N1		A0A498MZR2		A0A498N2C4		RXN35234.1	A0A498NUL3		26.2282	1						A0A498N2C4
	A0A498MVA6	A0A498LEJ3		A0A498MVA6		A0A498LRF7		RXN35285.1	A0A498NTD3	23.4698	23.4495	0						A0A498LRF7
	A0A498MWH4	A0A498NNW1		A0A498MWH4		A0A498L6Y8		RXN35286.1	A0A498NUD1	22.5991		1						A0A498L6Y8
	A0A498MRU3	A0A498MQK3		A0A498MRU3		A0A498LEV5		RXN35292.1	A0A498NT23	23.6612	27.3811	0						A0A498LEV5
	A0A498LTU4	A0A498LTK1		A0A498LTU4		A0A498N090		RXN35333.1	A0A498NTP8	24.7368		1						A0A498N090
	A0A498NRS4	A0A498N7M2		A0A498NRS4		A0A498LJU4		RXN35468.1	A0A498NUR8		24.9541	1						A0A498LJU4
	A0A498MHF6	A0A498MY60		A0A498MHF6		A0A498LLB2		RXN35469.1	A0A498NV49		23.6723	1						A0A498LLB2
	A0A498NRW6	A0A498NJQ8		A0A498NRW6		A0A498LF47		RXN35470.1	A0A498NTL0		28.0759	1						A0A498LF47
	A0A498N2C4	A0A498NR85		A0A498N2C4		A0A498NHH3		RXN37487.1	RXN37487.1		25.4192	1						A0A498NHH3
	A0A498LRF7	A0A498MQQ1		A0A498LRF7		A0A498MXR4		RXN38530.1	A0A498P1P5		34.2343	1						A0A498MXR4
	A0A498L6Y8	A0A498MYA6		A0A498L6Y8		A0A498LF21		RXN38872.1	A0A498P2L1	22.3829	28.3858	0						A0A498LF21
	A0A498LEV5	A0A498NT07		A0A498LEV5		A0A498N6F7		RXN02319.1	A0A498L271		27.3142	1						A0A498N6F7
	A0A498N090	A0A498LLB3		A0A498N090		A0A498M9R8		RXN03319.1	A0A498L508	27.594	27.0452	0						A0A498M9R8
	A0A498LJU4	A0A498LNQ2		A0A498LJU4		A0A498MWK5		RXN03366.1	A0A498L915		24.1278	1						A0A498MWK5
	A0A498LLB2	A0A498NQ57		A0A498LLB2		A0A498NIE0		RXN03413.1	A0A498L7M8	26.5573		1						A0A498NIE0
	A0A498LF47	A0A498NQ75		A0A498LF47		A0A498MI91		RXN03828.1	A0A498L6U5		26.5569	1						A0A498MI91
	A0A498NHH3	A0A498NPP4		A0A498NHH3		A0A498N5J2		RXN04131.1	A0A498L6X6	21.4009		1						A0A498N5J2
	A0A498MXR4	A0A498LGI2		A0A498MXR4		A0A498NTF6		RXN04144.1	A0A498LCA1		24.3375	1						A0A498NTF6
	A0A498LF21	A0A498NFX2		A0A498LF21		A0A498LKX7		RXN04382.1	A0A498L826	29.2838		1						A0A498LKX7
	A0A498N6F7	A0A498NNX0		A0A498N6F7		A0A498NR22		RXN04800.1	A0A498L8W6		21.6502	1						A0A498NR22
	A0A498M9R8	A0A498LGY1		A0A498M9R8		A0A498LVL4		RXN05026.1	A0A498LDK5		23.3145	1						A0A498LVL4
	A0A498MWK5	A0A498M0T0		A0A498MWK5		A0A498NTT7		RXN05447.1	A0A498LYP1		24.8828	1						A0A498NTT7
	A0A498NIE0	A0A498MTM6		A0A498NIE0		A0A498LYA1		RXN06873.1	A0A498LH72		23.2009	1						A0A498LYA1
	A0A498MI91	A0A498P559		A0A498MI91		A0A498LTJ0		RXN07020.1	A0A498LFR4	27.7516		1						A0A498LTJ0
	A0A498N5J2	A0A498MG09		A0A498N5J2		A0A498NGN3		RXN07131.1	A0A498LG57	25.9046		1						A0A498NGN3
	A0A498NTF6	A0A498NHG3		A0A498NTF6		A0A498MVI3		RXN07275.1	A0A498LPJ7	22.1642	24.7899	0						A0A498MVI3
	A0A498LKX7	A0A498LBY9		A0A498LKX7		A0A498MAC2		RXN07404.1	A0A498LL25		19.6471	1						A0A498MAC2
	A0A498NR22	A0A498MCY8		A0A498NR22		A0A498NSE5		RXN07496.1	A0A498LKF3	24.7112	26.2471	0						A0A498NSE5
	A0A498LVL4	A0A498N4Q6		A0A498LVL4		RXN35982.1		RXN07747.1	A0A498LQJ1	24.3447	25.1352	0						RXN35982.1
	A0A498NTT7	A0A498M167		A0A498NTT7		A0A498N3I9		RXN08402.1	A0A498LKN4	24.623	21.5316	0						A0A498N3I9
	A0A498LYA1	A0A498NST9		A0A498LYA1		A0A498MSG3		RXN08432.1	A0A498LKR5		24.4184	1						A0A498MSG3
	A0A498LTJ0	A0A498LN88		A0A498LTJ0		A0A498LFE6		RXN08883.1	A0A498LMR7	24.5638		1						A0A498LFE6
	A0A498NGN3	A0A498NT28		A0A498NGN3		A0A498MN03		RXN09054.1	A0A498LQR3	27.2385	26.589	0						A0A498MN03
	A0A498MVI3	A0A498NK38		A0A498MVI3		A0A498NUY7		RXN09191.1	A0A498LMB5		19.9237	1						A0A498NUY7
	A0A498MAC2	A0A498LIA0		A0A498MAC2		A0A498LGP1		RXN09586.1	V5XW03	27.2473		1						A0A498LGP1
	A0A498NSE5	A0A498N4V9		A0A498NSE5		A0A498LS48		RXN10117.1	A0A498LY61		20.8141	1						A0A498LS48
	RXN35982.1	A0A498MR76		RXN35982.1		A0A498LC60		RXN10364.1	A0A498LU94		25.6452	1						A0A498LC60
	A0A498N3I9	A0A498LDF0		A0A498N3I9		A0A498NY70		RXN10372.1	A0A498LRN4	24.6184	24.569	0						A0A498NY70
	A0A498MSG3	A0A498LFZ8		A0A498MSG3		A0A498MN87		RXN10408.1	A0A498LPP8		22.2304	1						A0A498MN87
	A0A498LFE6	A0A498M5E1		A0A498LFE6		A0A498LCW0		RXN10497.1	A0A498LZC4		25.3532	1						A0A498LCW0
	A0A498MN03	A0A498NRH8		A0A498MN03		A0A498MKV1		RXN10963.1	A0A498LTM5	24.9313	26.5528	0						A0A498MKV1
	A0A498NUY7	A0A498NTE8		A0A498NUY7		A0A498P0A0		RXN10977.1	A0A498M0S1	22.4141	26.534	0						A0A498P0A0
	A0A498LGP1	A0A498NSX2		A0A498LGP1		A0A498LC83		RXN11088.1	A0A498LRL2	26.3657	26.0606	0						A0A498LC83
	A0A498LS48	A0A498NUL3		A0A498LS48		A0A498M7U4		RXN11305.1	A0A498M0X4		23.9884	1						A0A498M7U4
	A0A498LC60	A0A498NPK0		A0A498LC60		A0A498N4G3		RXN11344.1	A0A498LWW5	22.2272	25.7806	0						A0A498N4G3
	A0A498NY70	A0A498N2D4		A0A498NY70		A0A498N5A5		RXN12071.1	A0A498LV45	22.0622		1						A0A498N5A5
	A0A498MN87	A0A498NDZ0		A0A498MN87		A0A498MMI4		RXN12513.1	A0A498LY84	23.3985	24.0308	0						A0A498MMI4
	A0A498LCW0	A0A498N3E3		A0A498LCW0		A0A498N421		RXN12623.1	A0A498LYK0		24.5306	1						A0A498N421
	A0A498MKV1	A0A498NU78		A0A498MKV1		A0A498L9L3		RXN12803.1	A0A498LZ39	24.3041		1						A0A498L9L3
	A0A498P0A0	A0A498LYZ7		A0A498P0A0		A0A498M2L1		RXN12837.1	A0A498M6L9	24.574	27.1644	0						A0A498M2L1
	A0A498LC83	A0A498LYU8		A0A498LC83		A0A498M7J9		RXN13042.1	A0A498LN23		22.158	1						A0A498M7J9
	A0A498M7U4	A0A498ME23		A0A498M7U4		A0A498LPC1		RXN13141.1	A0A498LY36	23.4421	23.6411	0						A0A498LPC1
	A0A498N4G3	A0A498LX76		A0A498N4G3		A0A498NTQ4		RXN13913.1	A0A498M237		24.3802	1						A0A498NTQ4
	A0A498N5A5	A0A498LH99		A0A498N5A5		A0A498N0B2		RXN14051.1	A0A498M0K0		21.8629	1						A0A498N0B2
	A0A498MMI4	A0A498NKD0		A0A498MMI4		A0A498NF02		RXN14139.1	A0A498LZX9		23.9565	1						A0A498NF02
	A0A498N421	A0A498LHU8		A0A498N421		A0A498LYY9		RXN14141.1	A0A498M0T0	22.4313		1						A0A498LYY9
	A0A498L9L3	A0A498NNV5		A0A498L9L3		A0A498MY71		RXN15428.1	A0A498M3J2		23.9883	1						A0A498MY71
	A0A498M2L1	A0A498MZI8		A0A498M2L1		A0A498NMP8		RXN15525.1	A0A498MDH4		22.43	1						A0A498NMP8
	A0A498NJH3	A0A498L271		A0A498NJH3		A0A498N4L7		RXN15578.1	A0A498M409	29.087	25.0403	0						A0A498N4L7
	A0A498M7J9	A0A498MF96		A0A498M7J9		A0A498NSQ2		RXN16193.1	A0A498M8I5	22.393	25.373	0						A0A498NSQ2
	A0A498LPC1	A0A498LBK2		A0A498LPC1		A0A498N3F6		RXN16615.1	A0A498MGP3	22.2376		1						A0A498N3F6
	A0A498NTQ4	A0A498N5K0		A0A498NTQ4		A0A498M1G8		RXN16627.1	A0A498MHY3	25.7688	25.1197	0						A0A498M1G8
	A0A498N0B2	A0A498ME94		A0A498N0B2		A0A498LSF8		RXN17032.1	A0A498MC78		23.3768	1						A0A498LSF8
	A0A498NF02	A0A498MJL5		A0A498NF02		A0A498MCG3		RXN17105.1	A0A498MIB9		25.4242	1						A0A498MCG3
	A0A498LYY9	A0A498LUK4		A0A498LYY9		A0A498LPA5		RXN17120.1	A0A498M9V9	23.2578		1						A0A498LPA5
	A0A498MY71	A0A498NTA6		A0A498MY71		A0A498N651		RXN17286.1	A0A498MDW1	27.3848	31.3881	0						A0A498N651
	A0A498NMP8	A0A498MH32		A0A498NMP8		A0A498MDX5		RXN17349.1	A0A498M8N9	24.8392	27.2516	0						A0A498MDX5
	A0A498N4L7	A0A498NJK5		A0A498N4L7		A0A498N1H3		RXN17531.1	A0A498M9R9	25.5882		1						A0A498N1H3
	A0A498NSQ2	A0A498L5X3		A0A498NSQ2		A0A498L907		RXN17622.1	A0A498ME27		24.3074	1						A0A498L907
	A0A498N3F6	A0A498M5U3		A0A498N3F6		A0A498LP08		RXN18799.1	A0A498MCG5	23.5967	25.3645	0						A0A498LP08
	A0A498M1G8	A0A498LGV3		A0A498M1G8		A0A498NU90		RXN18857.1	A0A498MPE4		22.8434	1						A0A498NU90
	A0A498LSF8	A0A498NK83		A0A498LSF8		A0A498LEV3		RXN19465.1	A0A498MQY2	27.5426		1						A0A498LEV3
	A0A498MCG3	A0A498N7X6		A0A498MCG3		A0A498NMR0		RXN19486.1	A0A498MKZ5		26.0329	1						A0A498NMR0
	A0A498LPA5	A0A498NJF9		A0A498LPA5		A0A498N1B2		RXN19579.1	A0A498MEF9		22.0758	1						A0A498N1B2
	A0A498N651	A0A498MH64		A0A498N651		A0A498LPI3		RXN19867.1	A0A498MSK6	21.686		1						A0A498LPI3
	A0A498MDX5	A0A498NC80		A0A498MDX5		A0A498N8P1		RXN20039.1	A0A498MFP2		34.5789	1						A0A498N8P1
	A0A498N1H3	A0A498NBE7		A0A498N1H3		A0A498MAV9		RXN20181.1	A0A498MGG0		24.6072	1						A0A498MAV9
	A0A498L907	A0A498MHH8		A0A498L907		A0A498MXH8		RXN20621.1	A0A498MHL4	24.0381	27.1239	0						A0A498MXH8
	A0A498LP08	A0A498M245		A0A498LP08		A0A498N9S3		RXN20766.1	A0A498MQB2	24.22		1						A0A498N9S3
	A0A498NU90	A0A498N7L7		A0A498NU90		A0A498MD49		RXN21339.1	A0A498MJ23	22.8567		1						A0A498MD49
	A0A498LEV3	A0A498MB31		A0A498LEV3		A0A498LZL8		RXN21481.1	A0A498MK82	24.9161	26.1434	0						A0A498LZL8
	A0A498NMR0	A0A498M6C3		A0A498NMR0		A0A498NDM8		RXN21529.1	A0A498MJQ0	23.7841	26.7715	0						A0A498NDM8
	A0A498N1B2	A0A498MXZ5		A0A498N1B2		A0A498NRH8		RXN21606.1	A0A498MTA8	26.054	30.4887	0						A0A498NRH8
	A0A498LPI3	A0A498LMB5		A0A498LPI3		A0A498LQ72		RXN22173.1	A0A498MQR6	24.0733		1						A0A498LQ72
	A0A498N8P1	A0A498NDR7		A0A498N8P1		A0A498MQA7		RXN22186.1	A0A498LHC0		26.3348	1						A0A498MQA7
	A0A498MAV9	A0A498MP20		A0A498MAV9		A0A498LCI4		RXN22645.1	A0A498N183		26.0335	1						A0A498LCI4
	A0A498MXH8	A0A498N2G5		A0A498MXH8		A0A498LBV2		RXN22903.1	A0A498MSN7		28.9242	1						A0A498LBV2
	A0A498N9S3	A0A498LE85		A0A498N9S3		A0A498NGH7		RXN23002.1	A0A498MTH9	23.5506	22.2956	0						A0A498NGH7
	A0A498MD49	A0A498NJB6		A0A498MD49		A0A498MIM1		RXN23178.1	A0A498MNX5		22.642	1						A0A498MIM1
	A0A498LZL8	A0A498NB21		A0A498LZL8		A0A498MD26		RXN23993.1	A0A498MW00		26.0671	1						A0A498MD26
	A0A498NDM8	A0A498LT11		A0A498NDM8		A0A498ME85		RXN24687.1	A0A498N7U1		26.599	1						A0A498ME85
	A0A498NRH8	A0A498MUH8		A0A498NRH8		A0A498L3R2		RXN24852.1	A0A498MZC7	26.8819		1						A0A498L3R2
	A0A498LQ72	A0A498MG85		A0A498LQ72		A0A498NB00		RXN24952.1	A0A498MZL1	24.4891		1						A0A498NB00
	A0A498MQA7	A0A498M1U7		A0A498MQA7		A0A498LXF0		RXN25260.1	A0A498MWX7	28.9963	26.8477	0						A0A498LXF0
	A0A498LCI4	A0A498LFT5		A0A498LCI4		A0A498NHN2		RXN25330.1	A0A498MX40		22.4065	1						A0A498NHN2
	A0A498LBV2	A0A498N4S4		A0A498LBV2		A0A498LMG7		RXN26104.1	A0A498N309		24.4309	1						A0A498LMG7
	A0A498NGH7	A0A498MUN0		A0A498NGH7		A0A498NU21		RXN26426.1	A0A498N771	26.3422	30.7053	0						A0A498NU21
	A0A498MIM1	A0A498LDZ5		A0A498MIM1		A0A498NNP0		RXN26499.1	A0A498MWU9	21.7139	25.7139	0						A0A498NNP0
	A0A498MD26	A0A498MHV3		A0A498MD26		A0A498MIP6		RXN26805.1	A0A498NBW5	24.9875	27.8614	0						A0A498MIP6
	A0A498ME85	A0A498MXH8		A0A498ME85		A0A498M8Q5		RXN26926.1	A0A498N8L3	23.4192		1						A0A498M8Q5
	A0A498L3R2	A0A498NVD1		A0A498L3R2		A0A498LFE7		RXN27358.1	A0A498MZJ9		26.1811	1						A0A498LFE7
	A0A498NB00	A0A498LKP9		A0A498NB00		A0A498NCW8		RXN27478.1	A0A498MZW6		28.2297	1						A0A498NCW8
	A0A498LXF0	A0A498N4U7		A0A498LXF0		A0A498NNV7		RXN27699.1	A0A498N083		33.347	1						A0A498NNV7
	A0A498NHN2	A0A498LQJ3		A0A498NHN2		A0A498MIU3		RXN27748.1	A0A498N0P9		24.409	1						A0A498MIU3
	A0A498LMG7	A0A498LKX7		A0A498LMG7		A0A498M5S4		RXN28474.1	A0A498N9T2	23.2781	21.1805	0						A0A498M5S4
	A0A498NU21	RXN18868.1		A0A498NU21		A0A498M998		RXN28526.1	A0A498NC47	26.8372	25.1347	0						A0A498M998
	A0A498NNP0	A0A498LP25		A0A498NNP0		A0A498LGC7		RXN28664.1	A0A498NA94		21.8004	1						A0A498LGC7
	A0A498MIP6	A0A498L9R3		A0A498MIP6		A0A498NT28		RXN28909.1	A0A498N3E7	24.9878	22.8691	0						A0A498NT28
	A0A498M8Q5	A0A498MGP7		A0A498M8Q5		A0A498LD02		RXN29080.1	A0A498N7U4		24.5784	1						A0A498LD02
	A0A498LFE7	A0A498L4W1		A0A498LFE7		A0A498LVS8		RXN29142.1	A0A498NB73	19.5636		1						A0A498LVS8
	A0A498NCW8	A0A498LPA5		A0A498NCW8		A0A498M8V5		RXN29248.1	A0A498N552		24.5374	1						A0A498M8V5
	A0A498NNV7	A0A498N651		A0A498NNV7		A0A498LZY1		RXN29777.1	A0A498NFA9		29.8497	1						A0A498LZY1
	A0A498MIU3	A0A498MDX5		A0A498MIU3		A0A498N9B0		RXN30332.1	A0A498ND87	22.0983		1						A0A498N9B0
	A0A498M5S4	A0A498MCG3		A0A498M5S4		A0A498MVR4		RXN30731.1	A0A498NFX2	25.1897		1						A0A498MVR4
	A0A498M998	A0A498MFS6		A0A498M998		A0A498N968		RXN30912.1	A0A498NGD9		20.85	1						A0A498N968
	A0A498LGC7	A0A498MQJ7		A0A498LGC7		A0A498LD68		RXN30930.1	A0A498NGG1	21.0054	26.695	0						A0A498LD68
	A0A498NT28	A0A498LQJ5		A0A498NT28		A0A498MA95		RXN31367.1	A0A498NI83	23.5892	25.8647	0						A0A498MA95
	A0A498LD02	A0A498NS65		A0A498LD02		A0A498MW07		RXN31413.1	A0A498NHT3		24.8561	1						A0A498MW07
	A0A498LVS8	A0A498P302		A0A498LVS8		A0A498L630		RXN31669.1	A0A498NIQ8	24.7879	25.7921	0						A0A498L630
	A0A498M8V5	A0A498ME27		A0A498M8V5		A0A498LRL5		RXN31897.1	A0A498NJR7	24.59	25.6855	0						A0A498LRL5
	A0A498LZY1	A0A498MZR2		A0A498LZY1		A0A498M5E1		RXN32175.1	A0A498N8A7	26.5319	28.5157	0						A0A498M5E1
	A0A498N9B0	A0A498M5E2		A0A498N9B0		A0A498MV71		RXN32529.1	A0A498NL60		24.267	1						A0A498MV71
	A0A498MVR4	A0A498NC01		A0A498MVR4		A0A498NDU4		RXN32539.1	A0A498NL71	24.6821		1						A0A498NDU4
	A0A498N968	A0A498P3S4		A0A498N968		A0A498L5A0		RXN33058.1	A0A498NMR7	25.5208	24.4825	0						A0A498L5A0
	A0A498LD68	A0A498NPW8		A0A498LD68		A0A498MZ10		RXN33077.1	A0A498NI43		23.8086	1						A0A498MZ10
	A0A498MA95	A0A498MS39		A0A498MA95		V5XVB7		RXN33106.1	A0A498NMV8	22.2994	23.131	0						V5XVB7
	A0A498MW07	A0A498MW00		A0A498MW07		A0A498NEQ6		RXN33195.1	A0A498NMP8		26.8763	1						A0A498NEQ6
	A0A498L630	A0A498LXI8		A0A498L630		A0A498LQR8		RXN33212.1	A0A498NML0	32.3851	35.49	0						A0A498LQR8
	A0A498LRL5	A0A498LYE1		A0A498LRL5		A0A498MJJ2		RXN33375.1	A0A498NN73	24.472		1						A0A498MJJ2
	A0A498M5E1	A0A498NRS5		A0A498M5E1		A0A498N1I4		RXN33546.1	A0A498NP49		22.7365	1						A0A498N1I4
	A0A498MV71	A0A498LUV3		A0A498MV71		A0A498LVX1		RXN33624.1	A0A498NPR9	24.7451		1						A0A498LVX1
	A0A498NDU4	A0A498LTU4		A0A498NDU4		A0A498LLQ2		RXN34282.1	A0A498NQE6	20.3162	22.1809	0						A0A498LLQ2
	A0A498L5A0	A0A498MRU3		A0A498L5A0		A0A498MYG2		RXN34350.1	A0A498NQL6		24.6681	1						A0A498MYG2
	A0A498MZ10	A0A498MWH4		A0A498MZ10		A0A498NUW6		RXN35247.1	A0A498NUU4	23.893		1						A0A498NUW6
	V5XVB7	A0A498L6Y8		V5XVB7		A0A498MTA8		RXN36925.1	A0A498NYB9	25.9706	29.7653	0						A0A498MTA8
	A0A498NEQ6	A0A498LEV5		A0A498NEQ6		A0A498NER5		RXN02670.1	A0A498L2K9		29.9283	1						A0A498NER5
	A0A498LQR8	A0A498MHF6		A0A498LQR8		A0A498MS40		RXN02801.1	A0A498L318	23.8599	27.0821	0						A0A498MS40
	A0A498MJJ2	A0A498NRW6		A0A498MJJ2		A0A498LLY9		RXN02824.1	A0A498L8U0		21.2132	1						A0A498LLY9
	A0A498N1I4	A0A498N2C4		A0A498N1I4		A0A498NNC6		RXN02840.1	A0A498L371	24.2158		1						A0A498NNC6
	A0A498LVX1	A0A498LRF7		A0A498LVX1		A0A498NZP2		RXN03773.1	A0A498L8U4		22.6074	1						A0A498NZP2
	A0A498LLQ2	A0A498N8S3		A0A498LLQ2		A0A498NG47		RXN04123.1	A0A498L9S6	28.6402	30.1259	0						A0A498NG47
	A0A498MYG2	A0A498MXR4		A0A498MYG2		A0A498MRW3		RXN04189.1	A0A498MBS7	22.1025	26.805	0						A0A498MRW3
	A0A498NUW6	A0A498NAP3		A0A498NUW6		A0A498M4I9		RXN04799.1	A0A498LY45	26.1822		1						A0A498M4I9
	A0A498MTA8	A0A498LDU4		A0A498MTA8		A0A498NMV8		RXN05000.1	A0A498L9E6		24.6148	1						A0A498NMV8
	A0A498NER5	A0A498LYF2		A0A498NER5		A0A498ME23		RXN05409.1	A0A498LAY2		25.8672	1						A0A498ME23
	A0A498MS40	A0A498NHH3		A0A498MS40		A0A498NKE3		RXN05435.1	A0A498LYN1		25.0483	1						A0A498NKE3
	A0A498LLY9	A0A498NW67		A0A498LLY9		A0A498LQI4		RXN05692.1	A0A498LBV2		26.1283	1						A0A498LQI4
	A0A498NNC6	A0A498LNY7		A0A498NNC6		A0A498M8A4		RXN05771.1	A0A498MKQ1	21.9714		1						A0A498M8A4
	A0A498NZP2	A0A498LQP8		A0A498NZP2		A0A498M3P0		RXN05906.1	A0A498LFY9	25.7724	26.5364	0						A0A498M3P0
	A0A498NG47	A0A498LF21		A0A498NG47		A0A498M5D7		RXN06070.1	A0A498LCW4		23.6678	1						A0A498M5D7
	A0A498MRW3	A0A498N6F7		A0A498MRW3		A0A498L892		RXN06102.1	A0A498LD43	24.7762	28.1598	0						A0A498L892
	A0A498M4I9	A0A498N962		A0A498M4I9		A0A498MM56		RXN06189.1	A0A498LCY6		24.9731	1						A0A498MM56
	A0A498NMV8	A0A498MBT3		A0A498NMV8		A0A498L5X3		RXN06893.1	A0A498LH90	21.7118	21.7561	0						A0A498L5X3
	A0A498ME23	A0A498MA84		A0A498ME23		A0A498NCK2		RXN07576.1	A0A498N9V5		20.5584	1						A0A498NCK2
	A0A498NKE3	A0A498NTT9		A0A498NKE3		A0A498LSW6		RXN07610.1	A0A498LHF1	23.361		1						A0A498LSW6
	A0A498LQI4	A0A498MI91		A0A498LQI4		A0A498LJL9		RXN08034.1	A0A498L8S6		23.303	1						A0A498LJL9
	A0A498M8A4	A0A498N5J2		A0A498M8A4		A0A498NUD1		RXN08503.1	A0A498LLS6	25.9104	27.3494	0						A0A498NUD1
	A0A498M3P0	A0A498MWK5		A0A498M3P0		A0A498NLH3		RXN08886.1	A0A498LP83		26.2748	1						A0A498NLH3
	A0A498M5D7	A0A498NIE0		A0A498M5D7		A0A498MYE1		RXN09647.1	A0A498LWL0		25.401	1						A0A498MYE1
	A0A498L892	A0A498NR22		A0A498L892		A0A498MAL1		RXN09656.1	A0A498LRE0	27.113		1						A0A498MAL1
	A0A498MM56	A0A498MVZ3		A0A498MM56		A0A498LXK5		RXN09904.1	A0A498LT11		26.7396	1						A0A498LXK5
	A0A498L5X3	A0A498NTT7		A0A498L5X3		A0A498L826		RXN10047.1	A0A498LXY4	23.2855		1						A0A498L826
	A0A498NCK2	A0A498MXX3		A0A498NCK2		A0A498NQV2		RXN10095.1	A0A498LXG5	27.3118	24.0761	0						A0A498NQV2
	A0A498LSW6	A0A498N5K8		A0A498LSW6		A0A498NJ04		RXN10332.1	A0A498LRJ7		26.0679	1						A0A498NJ04
	A0A498LJL9	A0A498M723		A0A498LJL9		A0A498N7E2		RXN10377.1	A0A498LYZ7		24.5883	1						A0A498N7E2
	A0A498NUD1	A0A498NTK6		A0A498NUD1		A0A498MAW9		RXN10437.1	A0A498LZ60		23.8607	1						A0A498MAW9
	A0A498NLH3	A0A498LTJ0		A0A498NLH3		A0A498LFD6		RXN10599.1	A0A498LQC0		25.1348	1						A0A498LFD6
	A0A498MYE1	A0A498NGN3		A0A498MYE1		A0A498LMW8		RXN11055.1	A0A498M073		23.3212	1						A0A498LMW8
	A0A498MAL1	A0A498MVI3		A0A498MAL1		A0A498NID7		RXN11205.1	A0A498LBG3	25.5024	25.3687	0						A0A498NID7
	A0A498LXK5	A0A498LKF6		A0A498LXK5		A0A498MG97		RXN11278.1	A0A498LS48	22.3154	20.6604	0						A0A498MG97
	A0A498L826	A0A498MSG3		A0A498L826		A0A498P1N8		RXN11753.1	A0A498LVV3	23.4815	23.0243	0						A0A498P1N8
	A0A498NQV2	A0A498LFE6		A0A498NQV2		A0A498LGG2		RXN11801.1	A0A498LUE7	22.1482	24.3423	0						A0A498LGG2
	A0A498NJ04	A0A498LQ71		A0A498NJ04		A0A498P2G6		RXN11805.1	A0A498M2A4		29.6447	1						A0A498P2G6
	A0A498N7E2	A0A498LP57		A0A498N7E2		A0A498LG39		RXN11936.1	A0A498LXK5	31.7584	24.2979	0						A0A498LG39
	A0A498MAW9	A0A498NUY7		A0A498MAW9		A0A498MN53		RXN12493.1	A0A498LY63		28.6022	1						A0A498MN53
	A0A498LFD6	A0A498NG47		A0A498LFD6		A0A498LDS4		RXN12783.1	A0A498LZ18		25.8908	1						A0A498LDS4
	A0A498LMW8	A0A498MY64		A0A498LMW8		A0A498MX46		RXN12795.1	A0A498M572	21.632	28.3811	0						A0A498MX46
	A0A498NID7	A0A498LXQ7		A0A498NID7		A0A498MQR6		RXN12828.1	A0A498LWC4	21.8286		1						A0A498MQR6
	A0A498MG97	A0A498MXG2		A0A498MG97		A0A498M5I5		RXN13257.1	A0A498M7U4	26.6993		1						A0A498M5I5
	A0A498P1N8	A0A498N9P2		A0A498P1N8		A0A498LJ30		RXN14360.1	A0A498M1F3		23.7229	1						A0A498LJ30
	A0A498LGG2	A0A498MV19		A0A498LGG2		A0A498MDW1		RXN16394.1	A0A498MAV9	23.0505		1						A0A498MDW1
	A0A498P2G6	A0A498LC60		A0A498P2G6		A0A498NA31		RXN16404.1	A0A498MAW9	25.2951	24.0089	0						A0A498NA31
	A0A498LG39	A0A498P3P8		A0A498LG39		A0A498LC17		RXN16513.1	A0A498M9R3	34.1986		1						A0A498LC17
	A0A498MN53	A0A498MJ33		A0A498MN53		A0A498M886		RXN16732.1	A0A498MBC6	21.5381		1						A0A498M886
	A0A498LDS4	A0A498LUH5		A0A498LDS4		A0A498NQ77		RXN16794.1	A0A498LGY3	23.8489	25.0694	0						A0A498NQ77
	A0A498MX46	A0A498NY70		A0A498MX46		A0A498MYT5		RXN17203.1	A0A498MBL7	24.3761	26.1513	0						A0A498MYT5
	A0A498MQR6	A0A498MN87		A0A498MQR6		A0A498LIJ2		RXN17207.1	A0A498MJQ7		24.1894	1						A0A498LIJ2
	A0A498M5I5	A0A498MQY5		A0A498M5I5		A0A498MB56		RXN17517.1	A0A498MKL0		21.8066	1						A0A498MB56
	A0A498LJ30	A0A498LCW0		A0A498LJ30		A0A498MBX9		RXN17571.1	A0A498M9V7	25.597		1						A0A498MBX9
	A0A498MDW1	A0A498L2D3		A0A498MDW1		A0A498NI83		RXN17891.1	A0A498MAL6		25.1755	1						A0A498NI83
	A0A498NA31	A0A498LC83		A0A498NA31		A0A498LLS1		RXN18436.1	A0A498MHR0	25.3328	28.8102	0						A0A498LLS1
	A0A498LC17	A0A498LHJ3		A0A498LC17		A0A498LTW8		RXN18567.1	A0A498MNH5	20.5149		1						A0A498LTW8
	A0A498M886	A0A498N963		A0A498M886		A0A498LGC3		RXN18609.1	A0A498MBZ1		28.0931	1						A0A498LGC3
	A0A498NQ77	A0A498LGP1		A0A498NQ77		A0A498MBZ1		RXN18865.1	A0A498MP51	30.1297	29.7425	0						A0A498MBZ1
	A0A498MYT5	A0A498MGP6		A0A498MYT5		A0A498LZJ7		RXN19602.1	A0A498L6D4	24.6035		1						A0A498LZJ7
	A0A498LIJ2	A0A498M1W5		A0A498LIJ2		A0A498MHX8		RXN19840.1	A0A498MI78	23.1908	24.6318	0						A0A498MHX8
	A0A498MB56	A0A498LKD0		A0A498MB56		A0A498ND87		RXN19865.1	A0A498MSG3		24.0202	1						A0A498ND87
	A0A498MBX9	A0A498L9L3		A0A498MBX9		A0A498LVI3		RXN20031.1	A0A498MG28		25.3624	1						A0A498LVI3
	A0A498NI83	A0A498M2L1		A0A498NI83		A0A498LRL2		RXN20038.1	A0A498MFM5	25.6726		1						A0A498LRL2
	A0A498LLS1	A0A498LK41		A0A498LLS1		A0A498LFS4		RXN20184.1	A0A498MLE9	26.4234	26.9491	0						A0A498LFS4
	A0A498LTW8	A0A498N9U1		A0A498LTW8		A0A498NV34		RXN20266.1	A0A498MNM0	24.1723	26.5951	0						A0A498NV34
	A0A498LGC3	A0A498L3Z8		A0A498LGC3		A0A498LFS7		RXN20326.1	A0A498MNT9	26.0185	26.3604	0						A0A498LFS7
	A0A498MBZ1	A0A498NJH3		A0A498MBZ1		A0A498NP17		RXN20777.1	A0A498MVG0	26.8884	27.4154	0						A0A498NP17
	A0A498LZJ7	A0A498LQL3		A0A498LZJ7		A0A498LTL2		RXN21191.1	A0A498MJE0		24.3542	1						A0A498LTL2
	A0A498MHX8	A0A498MCP3		A0A498MHX8		A0A498MNX5		RXN21487.1	A0A498MXY4	22.9252	23.2614	0						A0A498MNX5
	A0A498MRG0	A0A498LTV0		A0A498MRG0		A0A498M0P9		RXN21677.1	A0A498MYU7		23.6639	1						A0A498M0P9
	A0A498ND87	A0A498N5B9		A0A498ND87		A0A498N5Y8		RXN22363.1	A0A498LBD4	27.7704	27.5543	0						A0A498N5Y8
	A0A498LVI3	A0A498LJ59		A0A498LVI3		A0A498MLY0		RXN22513.1	A0A498MRM3	21.2789		1						A0A498MLY0
	A0A498LRL2	A0A498NTQ4		A0A498LRL2		A0A498N589		RXN22637.1	A0A498N1H4	21.8017		1						A0A498N589
	A0A498LFS4	A0A498MBX9		A0A498LFS4		A0A498NCT8		RXN22647.1	A0A498N1I4	25.3869	24.0347	0						A0A498NCT8
	A0A498NV34	A0A498MM58		A0A498NV34		A0A498LXX1		RXN23010.1	A0A498MRG9	22.9857	26.9651	0						A0A498LXX1
	A0A498LFS7	A0A498NF02		A0A498LFS7		A0A498N7X2		RXN23052.1	A0A498MTL7		27.3392	1						A0A498N7X2
	A0A498NP17	A0A498N309		A0A498NP17		A0A498MDJ5		RXN23706.1	A0A498MZN9	21.955	23.122	0						A0A498MDJ5
	A0A498LTL2	A0A498LYY9		A0A498LTL2		A0A498MRK5		RXN23751.1	A0A498MSU8		27.2742	1						A0A498MRK5
	A0A498MNX5	A0A498MY71		A0A498MNX5		A0A498MXS6		RXN23755.1	A0A498N4F4	26.6021		1						A0A498MXS6
	A0A498N0J8	A0A498MP79		A0A498N0J8		A0A498MSY1		RXN24052.1	A0A498MWP3		20.03	1						A0A498MSY1
	A0A498M0P9	A0A498NJZ3		A0A498M0P9		A0A498M3Y7		RXN25194.1	A0A498N0B4		27.8742	1						A0A498M3Y7
	A0A498N5Y8	A0A498N049		A0A498N5Y8		A0A498NPH4		RXN25342.1	A0A498N0M9	23.4849	26.807	0						A0A498NPH4
	A0A498MLY0	A0A498NLB3		A0A498MLY0		A0A498NZS0		RXN25564.1	A0A498N1E0		20.8645	1						A0A498NZS0
	A0A498N589	A0A498LRJ7		A0A498N589		A0A498L4B7		RXN25820.1	A0A498MYF0	23.7394		1						A0A498L4B7
	A0A498NCT8	A0A498N752		A0A498NCT8		A0A498M7R6		RXN26085.1	A0A498LAN4		22.5174	1						A0A498M7R6
	A0A498LXX1	A0A498N7M9		A0A498LXX1		A0A498MIN9		RXN26344.1	A0A498N3P9	22.5522	23.8459	0						A0A498MIN9
	A0A498N7X2	A0A498NGG1		A0A498N7X2		A0A498NRX9		RXN26464.1	A0A498P2C4		25.7691	1						A0A498NRX9
	A0A498L8D0	A0A498NQG1		A0A498L8D0		A0A498P5C7		RXN26818.1	A0A498MXZ5		26.2532	1						A0A498P5C7
	A0A498MDJ5	A0A498NBS6		A0A498MDJ5		A0A498LNV6		RXN26833.1	A0A498N3S1		26.455	1						A0A498LNV6
	A0A498MRK5	A0A498MYZ9		A0A498MRK5		A0A498N3Z0		RXN26913.1	A0A498N3Z0	24.4939		1						A0A498N3Z0
	A0A498MXS6	A0A498N1H3		A0A498MXS6		A0A498LFR4		RXN27925.1	A0A498NDM4		23.511	1						A0A498LFR4
	A0A498MSY1	A0A498L907		A0A498MSY1		A0A498MY23		RXN27990.1	A0A498N4L7	21.2029	27.8976	0						A0A498MY23
	A0A498M3Y7	A0A498NU90		A0A498M3Y7		A0A498LDA8		RXN28067.1	A0A498NE60	25.7315	23.1873	0						A0A498LDA8
	A0A498NPH4	A0A498NK12		A0A498NPH4		A0A498LZ21		RXN28151.1	A0A498N5R3		22.2635	1						A0A498LZ21
	A0A498NZS0	A0A498LAZ0		A0A498NZS0		A0A498LU33		RXN28219.1	A0A498N1Q0		23.4779	1						A0A498LU33
	A0A498L4B7	A0A498NMR0		A0A498L4B7		A0A498N991		RXN28223.1	A0A498N7N0	26.8815	24.4923	0						A0A498N991
	A0A498M7R6	A0A498MYF6		A0A498M7R6		A0A498MHG4		RXN28225.1	A0A498NDZ0	24.5459		1						A0A498MHG4
	A0A498MIN9	A0A498M7L0		A0A498MIN9		A0A498NA94		RXN28628.1	A0A498N377	23.3988	28.8097	0						A0A498NA94
	A0A498NRX9	A0A498N1B2		A0A498NRX9		A0A498NHT1		RXN28722.1	RXN28722.1		27.6047	1						A0A498NHT1
	A0A498P5C7	A0A498NLN5		A0A498P5C7		A0A498MZL1		RXN28859.1	A0A498N3A5	22.5804	25.3334	0						A0A498MZL1
	A0A498LNV6	A0A498LPI3		A0A498LNV6		A0A498NTC0		RXN28883.1	A0A498N9B6		21.8963	1						A0A498NTC0
	A0A498N3Z0	A0A498MKM0		A0A498N3Z0		A0A498N149		RXN28900.1	A0A498N748	22.8123	22.005	0						A0A498N149
	A0A498LFR4	A0A498P2L1		A0A498LFR4		A0A498NDB0		RXN28930.1	A0A498N7E8	24.7564	25.763	0						A0A498NDB0
	A0A498MY23	A0A498LDW3		A0A498MY23		A0A498LWI8		RXN29156.1	A0A498ND79	25.0227	27.1912	0						A0A498LWI8
	A0A498LDA8	A0A498N230		A0A498LDA8		A0A498LDE8		RXN30161.1	A0A498NAP7	24.0679	26.364	0						A0A498LDE8
	A0A498LQF8	A0A498LRL0		A0A498LQF8		A0A498NIU6		RXN30391.1	A0A498NB68		25.7361	1						A0A498NIU6
	A0A498LZ21	A0A498N8P1		A0A498LZ21		A0A498NBH4		RXN30424.1	A0A498NDL5		24.6414	1						A0A498NBH4
	A0A498LU33	A0A498LZL8		A0A498LU33		A0A498NGG7		RXN30429.1	A0A498N7L6		25.22	1						A0A498NGG7
	A0A498N991	A0A498MD49		A0A498N991		A0A498NRU8		RXN30481.1	A0A498NBE3	25.493	32.0004	0						A0A498NRU8
	A0A498MHG4	A0A498NJN5		A0A498MHG4		A0A498M9J9		RXN30514.1	A0A498NDR0		26.501	1						A0A498M9J9
	A0A498NA94	A0A498N2B6		A0A498NA94		A0A498N1F6		RXN31460.1	A0A498NHX9		25.4582	1						A0A498N1F6
	A0A498NHT1	A0A498N4Q4		A0A498NHT1		A0A498LUF5		RXN31778.1	A0A498NIW4	35.818	28.8767	0						A0A498LUF5
	A0A498MZL1	A0A498MQA7		A0A498MZL1		A0A498LAZ1		RXN31833.1	A0A498NJ04	24.5776	26.4899	0						A0A498LAZ1
	A0A498NTC0	A0A498LQ72		A0A498NTC0		A0A498LYF2		RXN31902.1	A0A498NJ09	24.3816	32.2148	0						A0A498LYF2
	A0A498N149	A0A498M9J9		A0A498N149		A0A498NP10		RXN31959.1	A0A498NJK5		26.913	1						A0A498NP10
	A0A498NDB0	A0A498LCI4		A0A498NDB0		A0A498P2N6		RXN32558.1	A0A498NL76	22.4724	22.3191	0						A0A498P2N6
	A0A498LWI8	A0A498LBV2		A0A498LWI8		A0A498MYQ5		RXN33068.1	A0A498NMS8	23.3085		1						A0A498MYQ5
	A0A498NVE4	A0A498NP55		A0A498NVE4		A0A498LBP2		RXN33378.1	A0A498NNN0	22.2644		1						A0A498LBP2
	A0A498LDE8	A0A498MB87		A0A498LDE8		A0A498NQC6		RXN33407.1	A0A498NPD7	24.0517	24.7945	0						A0A498NQC6
	A0A498NIU6	A0A498MPE0		A0A498NIU6		A0A498MW09		RXN33599.1	A0A498NPF6		24.8356	1						A0A498MW09
	A0A498NBH4	A0A498MIM1		A0A498NBH4		A0A498N1E7		RXN34175.1	A0A498NQC9	23.733	27.0908	0						A0A498N1E7
	A0A498NGG7	A0A498L3R2		A0A498NGG7		A0A498MNT9		RXN34476.1	A0A498NRS4		26.2677	1						A0A498MNT9
	A0A498NRU8	A0A498NNW4		A0A498NRU8		A0A498NC84		RXN34578.1	A0A498NS37		24.8943	1						A0A498NC84
	A0A498M9J9	A0A498MN03		A0A498M9J9		A0A498LGX9		RXN34722.1	A0A498NRM4		23.1855	1						A0A498LGX9
	A0A498N1F6	A0A498LXF0		A0A498N1F6		A0A498N0P4		RXN34815.1	A0A498NS72		25.6598	1						A0A498N0P4
	A0A498LUF5	A0A498LWS5		A0A498LUF5		A0A498NEV1		RXN35213.1	A0A498NTC7		26.9154	1						A0A498NEV1
	A0A498LAZ1	A0A498LMG7		A0A498LAZ1		A0A498NHS7		RXN35412.1	A0A498NTF7		26.9446	1						A0A498NHS7
	A0A498LYF2	A0A498N0R1		A0A498LYF2		A0A498MZQ6		RXN36175.1	A0A498NW20	25.7407	27.2791	0						A0A498MZQ6
	A0A498NP10	A0A498MIP6		A0A498NP10		A0A498N0R1		RXN37108.1	A0A498NZ89	25.1771	24.8841	0						A0A498N0R1
	A0A498P2N6	A0A498NNV7		A0A498P2N6		A0A498NA52		RXN37124.1	A0A498P0P1	20.4889		1						A0A498NA52
	A0A498MYQ5	A0A498LD02		A0A498MYQ5		A0A498N8X6		RXN38961.1	A0A498P431		24.4547	1						A0A498N8X6
	A0A498LBP2	A0A498LVS8		A0A498LBP2		A0A498N898		RXN02335.1	A0A498MMI0	25.2985	22.3057	0						A0A498N898
	A0A498NQC6	A0A498M8V5		A0A498NQC6		A0A498MFA4		RXN02391.1	A0A498L1U6		24.4303	1						A0A498MFA4
	A0A498MW09	A0A498MN52		A0A498MW09		A0A498MPR7		RXN02948.1	A0A498L4B7	24.7473		1						A0A498MPR7
	A0A498N1E7	A0A498LZY1		A0A498N1E7		A0A498LY82		RXN03777.1	A0A498LDE1		27.3475	1						A0A498LY82
	A0A498MNT9	A0A498N9B0		A0A498MNT9		A0A498L606		RXN04541.1	A0A498L837		26.8019	1						A0A498L606
	A0A498NC84	A0A498MVR4		A0A498NC84		A0A498LAD7		RXN04546.1	A0A498LC95		25.9296	1						A0A498LAD7
	A0A498LGX9	A0A498LVU3		A0A498LGX9		A0A498NSF9		RXN05171.1	A0A498L9Y5	23.0449		1						A0A498NSF9
	A0A498N0P4	A0A498NGH7		A0A498N0P4		A0A498M6K1		RXN05374.1	A0A498LFE7	22.5387		1						A0A498M6K1
	A0A498NEV1	A0A498N968		A0A498NEV1		A0A498P465		RXN05389.1	A0A498MW39	23.4811	24.8057	0						A0A498P465
	A0A498NHS7	A0A498MRQ2		A0A498NHS7		A0A498P2W9		RXN05911.1	A0A498LC83	25.6072		1						A0A498P2W9
	A0A498MZQ6	A0A498LD68		A0A498MZQ6		A0A498NJ16		RXN06001.1	A0A498LCK2	25.4633		1						A0A498NJ16
	A0A498N0R1	A0A498NJ66		A0A498N0R1		A0A498NSV6		RXN06033.1	A0A498LEZ0	24.501	24.6872	0						A0A498NSV6
	A0A498NA52	A0A498MV71		A0A498NA52		A0A498MB86		RXN06280.1	A0A498M794	21.7591		1						A0A498MB86
	A0A498N8X6	A0A498MJ92		A0A498N8X6		A0A498MRI1		RXN06916.1	A0A498LIS4	23.9843		1						A0A498MRI1
	A0A498N898	A0A498N220		A0A498N898		A0A498MVV8		RXN08717.1	A0A498LTF9		24.342	1						A0A498MVV8
	A0A498MFA4	A0A498NDU4		A0A498MFA4		A0A498NZ94		RXN08736.1	A0A498MHN6	24.8535	22.3739	0						A0A498NZ94
	A0A498MPR7	A0A498L5A0		A0A498MPR7		A0A498NT14		RXN10118.1	A0A498LNV7	22.4654	25.5558	0						A0A498NT14
	A0A498LY82	A0A498LLL7		A0A498LY82		A0A498LL35		RXN10253.1	A0A498LRE4		29.5125	1						A0A498LL35
	A0A498L606	V5XVB7		A0A498L606		A0A498NL76		RXN10330.1	A0A498LQ81	24.0436		1						A0A498NL76
	A0A498LAD7	A0A498LAF5		A0A498LAD7		A0A498NA79		RXN10591.1	A0A498LR71	22.1562		1						A0A498NA79
	A0A498NSF9	A0A498NTC1		A0A498NSF9		A0A498MKU0		RXN10661.1	A0A498LRE1	20.2586	26.3245	0						A0A498MKU0
	A0A498M6K1	A0A498MRY7		A0A498M6K1		A0A498MK72		RXN11122.1	A0A498LTW5		27.7713	1						A0A498MK72
	A0A498P465	A0A498MDU7		A0A498P465		A0A498NJP2		RXN11157.1	A0A498M1B4	21.5468	27.1039	0						A0A498NJP2
	A0A498P2C7	A0A498L917		A0A498P2C7		A0A498LF02		RXN11182.1	A0A498LU25	23.1329		1						A0A498LF02
	A0A498P2W9	A0A498LQF9		A0A498P2W9		A0A498NUU4		RXN11710.1	A0A498N5G2		25.6776	1						A0A498NUU4
	A0A498NJ16	A0A498LQC0		A0A498NJ16		A0A498M7X2		RXN12562.1	A0A498LYU8	23.9092	24.9491	0						A0A498M7X2
	A0A498NSV6	A0A498LV52		A0A498NSV6		A0A498NDH5		RXN12610.1	A0A498LWP3	22.2224	23.6702	0						A0A498NDH5
	A0A498MB86	A0A498MCU7		A0A498MB86		A0A498LP20		RXN12630.1	A0A498LWR2		24.4337	1						A0A498LP20
	A0A498MRI1	A0A498MY47		A0A498MRI1		A0A498NP92		RXN12914.1	A0A498M1G4		24.7189	1						A0A498NP92
	A0A498MVV8	A0A498MB94		A0A498MVV8		A0A498MFH6		RXN13166.1	A0A498M118	23.6597	24.1612	0						A0A498MFH6
	A0A498NZ94	A0A498NAL4		A0A498NZ94		A0A498NEP4		RXN13940.1	A0A498M080	25.5256		1						A0A498NEP4
	A0A498NT14	A0A498LCP6		A0A498NT14		A0A498MSU7		RXN13949.1	A0A498LZE6		23.0298	1						A0A498MSU7
	A0A498LL35	A0A498MXC9		A0A498LL35		A0A498MQ09		RXN14315.1	A0A498M9V8		28.452	1						A0A498MQ09
	A0A498NL76	A0A498MM44		A0A498NL76		A0A498N4C9		RXN15130.1	A0A498M3M6	27.8939	25.6174	0						A0A498N4C9
	A0A498NA79	A0A498MYG2		A0A498NA79		A0A498NH26		RXN15149.1	A0A498M2R2		21.7576	1						A0A498NH26
	A0A498MKU0	A0A498NCV6		A0A498MKU0		A0A498MWT1		RXN15359.1	A0A498M3B5		26.5523	1						A0A498MWT1
	A0A498MK72	A0A498NUW6		A0A498MK72		A0A498NZY2		RXN15568.1	A0A498M3Z6	32.6643	37.8773	0						A0A498NZY2
	A0A498NJP2	A0A498MTA8		A0A498NJP2		A0A498N771		RXN15692.1	A0A498M8Q5	24.2086		1						A0A498N771
	A0A498LF02	A0A498MS40		A0A498LF02		A0A498NYE1		RXN15805.1	A0A498ME85	25.8939	31.7817	0						A0A498NYE1
	A0A498NUU4	A0A498MYE0		A0A498NUU4		A0A498M3D1		RXN15959.1	A0A498M509	25.1986	26.2311	0						A0A498M3D1
	A0A498M7X2	A0A498MZZ1		A0A498M7X2		A0A498M9A8		RXN15981.1	A0A498M5X0		23.9095	1						A0A498M9A8
	A0A498NDH5	A0A498M0T3		A0A498NDH5		A0A498LYT4		RXN16332.1	A0A498MA95	28.4777	20.8616	0						A0A498LYT4
	A0A498LP20	A0A498MYG1		A0A498LP20		A0A498M637		RXN16355.1	A0A498MFU8		26.1405	1						A0A498M637
	A0A498NP92	A0A498LV30		A0A498NP92		A0A498MJ08		RXN16388.1	A0A498M656	22.812		1						A0A498MJ08
	A0A498MFH6	A0A498NNC6		A0A498MFH6		A0A498MYN3		RXN16402.1	A0A498MAG6		27.4431	1						A0A498MYN3
	A0A498NEP4	A0A498MC65		A0A498NEP4		A0A498LR17		RXN16468.1	A0A498M6D2		23.8199	1						A0A498LR17
	A0A498MSU7	A0A498N071		A0A498MSU7		A0A498MDY1		RXN16629.1	A0A498M6V3	23.4752	25.3721	0						A0A498MDY1
	A0A498MQ09	A0A498NZP2		A0A498MQ09		A0A498NR10		RXN16811.1	A0A498M820		30.5438	1						A0A498NR10
	A0A498N4C9	A0A498N0M0		A0A498N4C9		A0A498NKB1		RXN16989.1	A0A498M7R6		24.5874	1						A0A498NKB1
	A0A498NH26	A0A498L407		A0A498NH26		A0A498MR33		RXN16998.1	A0A498M7T0	27.2856	26.0278	0						A0A498MR33
	A0A498MWT1	A0A498NKD7		A0A498MWT1		A0A498LFV9		RXN17023.1	A0A498MAZ7		25.0126	1						A0A498LFV9
	A0A498NZY2	A0A498NJ35		A0A498NZY2		A0A498LXA3		RXN17123.1	A0A498MB87		26.7725	1						A0A498LXA3
	A0A498N771	A0A498MFX3		A0A498N771		A0A498NB35		RXN17501.1	A0A498LJH9		20.9712	1						A0A498NB35
	A0A498NYE1	A0A498MD88		A0A498NYE1		A0A498LMN9		RXN17686.1	A0A498MFD4		24.5282	1						A0A498LMN9
	A0A498M3D1	A0A498LAT7		A0A498M3D1		A0A498MF85		RXN17705.1	A0A498MK73	24.2917	28.7971	0						A0A498MF85
	A0A498M9A8	A0A498M5K1		A0A498M9A8		A0A498LNB6		RXN18118.1	A0A498NWS8		26.0416	1						A0A498LNB6
	A0A498LYT4	A0A498M4I9		A0A498LYT4		A0A498NIJ0		RXN18205.1	A0A498MLW3	25.9521	30.8388	0						A0A498NIJ0
	A0A498M637	A0A498NZS0		A0A498M637		A0A498L9Y5		RXN18533.1	A0A498MFE1		23.6526	1						A0A498L9Y5
	A0A498MJ08	A0A498N424		A0A498MJ08		A0A498NNF5		RXN19759.1	A0A498MEX1		22.5114	1						A0A498NNF5
	A0A498MYN3	A0A498N0I6		A0A498MYN3		A0A498LKV8		RXN20063.1	A0A498MJT7	26.0194	25.3637	0						A0A498LKV8
	A0A498LR17	A0A498NMN1		A0A498LR17		A0A498NPA3		RXN20464.1	A0A498MM56	27.7004	29.7137	0						A0A498NPA3
	A0A498MDY1	A0A498NMV8		A0A498MDY1		A0A498NC63		RXN20574.1	A0A498MMI4	27.062	26.808	0						A0A498NC63
	A0A498NR10	A0A498L6D4		A0A498NR10		A0A498N127		RXN20586.1	A0A498MPQ1	23.3382	25.9617	0						A0A498N127
	A0A498NKB1	A0A498LQI4		A0A498NKB1		A0A498L6Y3		RXN20587.1	A0A498MUR0	29.679	24.6655	0						A0A498L6Y3
	A0A498MR33	A0A498N838		A0A498MR33		A0A498MQK5		RXN20617.1	A0A498MUU2	25.7567	29.4966	0						A0A498MQK5
	A0A498LFV9	A0A498NH26		A0A498LFV9		A0A498L6Z5		RXN21078.1	A0A498MID9		28.0053	1						A0A498L6Z5
	A0A498LXA3	A0A498LQN4		A0A498LXA3		A0A498LUM9		RXN21084.1	A0A498MP00		22.1661	1						A0A498LUM9
	A0A498NB35	A0A498LY83		A0A498NB35		H9C4W4		RXN21342.1	A0A498MNX8		25.3077	1						H9C4W4
	A0A498LMN9	A0A498M5D7		A0A498LMN9		A0A498MFZ0		RXN21444.1	A0A498MPZ9		29.1434	1						A0A498MFZ0
	A0A498MF85	A0A498NQE6		A0A498MF85		A0A498NJD9		RXN21501.1	A0A498MKA5	21.4675		1						A0A498NJD9
	A0A498LNB6	A0A498M4Z4		A0A498LNB6		A0A498LL08		RXN21518.1	A0A498MJI1		25.1144	1						A0A498LL08
	A0A498NIJ0	A0A498NBW8		A0A498NIJ0		A0A498NJK3		RXN21536.1	A0A498MT19	25.4762		1						A0A498NJK3
	A0A498L9Y5	A0A498MM56		A0A498L9Y5		A0A498LT59		RXN21624.1	A0A498MQK5		23.8887	1						A0A498LT59
	A0A498NNF5	A0A498NCK2		A0A498NNF5		A0A498MS66		RXN21881.1	A0A498MLK0		26.8526	1						A0A498MS66
	A0A498LKV8	A0A498LSW6		A0A498LKV8		A0A498L6R9		RXN21926.1	A0A498MUN0	26.2465	23.0409	0						A0A498L6R9
	A0A498NPA3	A0A498L6U4		A0A498NPA3		A0A498LRQ3		RXN22264.1	A0A498MSB3	23.1036	23.061	0						A0A498LRQ3
	A0A498NC63	A0A498NSQ3		A0A498NC63		A0A498N0I6		RXN22310.1	A0A498MPN9		26.0997	1						A0A498N0I6
	A0A498N127	A0A498LUS8		A0A498N127		A0A498M7H1		RXN22343.1	A0A498MR76	22.4949	27.7709	0						A0A498M7H1
	A0A498L6Y3	A0A498M0N2		A0A498L6Y3		A0A498L2K9		RXN22540.1	A0A498MQA7	23.6329	21.1119	0						A0A498L2K9
	A0A498MQK5	A0A498LFD6		A0A498MQK5		A0A498LGP6		RXN22664.1	A0A498MTC9		24.5441	1						A0A498LGP6
	A0A498L6Z5	A0A498LMW8		A0A498L6Z5		A0A498LLX7		RXN22842.1	A0A498MT57	22.5958	23.7557	0						A0A498LLX7
	A0A498LUM9	A0A498NUD1		A0A498LUM9		A0A498M698		RXN22905.1	A0A498N1Z5	23.0362	24.9876	0						A0A498M698
	A0A498MF05	A0A498P1P5		A0A498MF05		A0A498MIQ6		RXN22963.1	A0A498MSV3	26.065	23.7089	0						A0A498MIQ6
	H9C4W4	A0A498LMT8		H9C4W4		A0A498LQ71		RXN23255.1	A0A498N326	22.1236	26.9949	0						A0A498LQ71
	A0A498MFZ0	A0A498LHI3		A0A498MFZ0		A0A498LHR2		RXN23343.1	A0A498MRU4	25.6364		1						A0A498LHR2
	A0A498NJD9	A0A498L447		A0A498NJD9		A0A498MTA7		RXN23419.1	A0A498NFP5		22.6171	1						A0A498MTA7
	A0A498LL08	A0A498NDH4		A0A498LL08		A0A498LX10		RXN23765.1	A0A498N4G3	26.1509	23.7444	0						A0A498LX10
	A0A498NJK3	A0A498MGP2		A0A498NJK3		A0A498MZP1		RXN24121.1	A0A498MU58	24.1075	27.209	0						A0A498MZP1
	A0A498LT59	A0A498MAJ8		A0A498LT59		A0A498M939		RXN24927.1	A0A498N8H1	33.0784	24.5644	0						A0A498M939
	A0A498MS66	A0A498NV48		A0A498MS66		A0A498MCU8		RXN25437.1	A0A498N9Q8		25.9567	1						A0A498MCU8
	A0A498L6R9	A0A498NTK2		A0A498L6R9		A0A498LRL0		RXN25577.1	A0A498NA38		25.7435	1						A0A498LRL0
	A0A498LRQ3	A0A498LGP6		A0A498LRQ3		A0A498NBJ3		RXN25611.1	A0A498MYN3	27.2223	25.0075	0						A0A498NBJ3
	A0A498N0I6	A0A498N6P6		A0A498N0I6		A0A498LU12		RXN25879.1	A0A498L1B2		22.7918	1						A0A498LU12
	A0A498M7H1	A0A498NIT8		A0A498M7H1		A0A498N6B6		RXN26345.1	A0A498NAX1	32.737	36.7318	0						A0A498N6B6
	A0A498L2K9	A0A498N0M1		A0A498L2K9		A0A498MHB9		RXN26630.1	A0A498N0P4		25.5165	1						A0A498MHB9
	A0A498LGP6	A0A498LZ34		A0A498LGP6		A0A498MP26		RXN26777.1	A0A498NCK2	23.192	24.8539	0						A0A498MP26
	A0A498LLX7	A0A498LMZ7		A0A498LLX7		A0A498LLM0		RXN26829.1	A0A498MXS1	21.3636	26.8338	0						A0A498LLM0
	A0A498M698	A0A498MXH7		A0A498M698		A0A498N9I9		RXN26854.1	A0A498N5A5	22.3169		1						A0A498N9I9
	A0A498MIQ6	A0A498N0X0		A0A498MIQ6		A0A498LUW8		RXN27191.1	A0A498N353	25.4775		1						A0A498LUW8
	A0A498LQ71	A0A498NI11		A0A498LQ71		A0A498LC93		RXN27709.1	A0A498N094	22.7939	22.9499	0						A0A498LC93
	A0A498ME58	A0A498MG97		A0A498ME58		A0A498N171		RXN27777.1	A0A498NDX8		25.6457	1						A0A498N171
	A0A498LHR2	A0A498P1N8		A0A498LHR2		A0A498L9H1		RXN27790.1	A0A498N424	25.9743		1						A0A498L9H1
	A0A498MTA7	A0A498MC33		A0A498MTA7		A0A498LUS8		RXN27823.1	A0A498NZL4		23.8034	1						A0A498LUS8
	A0A498LX10	A0A498NTG3		A0A498LX10		A0A498M0N2		RXN27853.1	A0A498N6L4		24.0185	1						A0A498M0N2
	A0A498MZP1	A0A498N8H1		A0A498MZP1		A0A498NSQ3		RXN27935.1	A0A498NDM8	23.6471		1						A0A498NSQ3
	A0A498M939	A0A498LGG2		A0A498M939		A0A498MXA6		RXN27948.1	A0A498N171	23.7025		1						A0A498MXA6
	A0A498MCU8	A0A498N173		A0A498MCU8		A0A498MUU2		RXN28119.1	A0A498N1F4		23.9067	1						A0A498MUU2
	A0A498LRL0	A0A498LRJ3		A0A498LRL0		A0A498N769		RXN28782.1	A0A498NAC9		23.7189	1						A0A498N769
	A0A498NBJ3	A0A498LG39		A0A498NBJ3		A0A498LUF9		RXN28947.1	A0A498NEV1	23.952		1						A0A498LUF9
	A0A498LU12	A0A498P2G6		A0A498LU12		A0A498MRM7		RXN29076.1	A0A498ND37		25.5559	1						A0A498MRM7
	A0A498N6B6	A0A498MIM7		A0A498N6B6		A0A498LB15		RXN29253.1	A0A498NA51	22.7874	25.0322	0						A0A498LB15
	A0A498MHB9	A0A498MDU9		A0A498MHB9		A0A498LGI9		RXN29711.1	A0A498LMI2	23.2026	22.7007	0						A0A498LGI9
	A0A498MP26	A0A498LCA1		A0A498MP26		A0A498LBG1		RXN29782.1	A0A498NCD2		25.9581	1						A0A498LBG1
	A0A498LLM0	A0A498NKJ5		A0A498LLM0		A0A498MU58		RXN29889.1	A0A498N637	27.9273	29.7272	0						A0A498MU58
	A0A498N9I9	A0A498MX46		A0A498N9I9		A0A498MVA7		RXN29890.1	A0A498NA00	28.4134	30.0379	0						A0A498MVA7
	A0A498LUW8	A0A498MN53		A0A498LUW8		A0A498MQ50		RXN30962.1	A0A498NGI1	26.9023	29.4369	0						A0A498MQ50
	A0A498LC93	A0A498N086		A0A498LC93		A0A498LZT4		RXN31008.1	A0A498NGQ8	23.4201	26.1938	0						A0A498LZT4
	A0A498N171	A0A498N7E2		A0A498N171		A0A498MHR7		RXN31038.1	A0A498NGU3	21.6856	26.9516	0						A0A498MHR7
	A0A498L9H1	A0A498NJP2		A0A498L9H1		A0A498NB20		RXN31451.1	A0A498NI01	25.1146	25.9021	0						A0A498NB20
	A0A498MFH8	A0A498MQR6		A0A498MFH8		A0A498M5J5		RXN32000.1	A0A498NJ89		23.9487	1						A0A498M5J5
	A0A498MNH3	A0A498N8L3		A0A498MNH3		A0A498N6M0		RXN32274.1	A0A498NKP3	25.7953	26.1621	0						A0A498N6M0
	A0A498LUS8	A0A498LLX7		A0A498LUS8		A0A498M1Y9		RXN32682.1	A0A498NL81		25.382	1						A0A498M1Y9
	A0A498M0N2	A0A498M5I5		A0A498M0N2		A0A498MFZ2		RXN33180.1	A0A498L9L3	22.1724	24.3147	0						A0A498MFZ2
	A0A498NSQ3	A0A498MDW1		A0A498NSQ3		A0A498NJ86		RXN33604.1	A0A498NPP7	22.9024	24.1476	0						A0A498NJ86
	A0A498MXA6	A0A498LP65		A0A498MXA6		A0A498LDW3		RXN33757.1	A0A498NQE4		25.5115	1						A0A498LDW3
	A0A498MUU2	A0A498LPP8		A0A498MUU2		A0A498N230		RXN33762.1	A0A498NP11	24.2303		1						A0A498N230
	A0A498N769	A0A498M981		A0A498N769		A0A498LWH4		RXN33782.1	A0A498NP29		25.4149	1						A0A498LWH4
	A0A498LUF9	A0A498NA31		A0A498LUF9		A0A498LTT6		RXN34042.1	A0A498NPR6		25.939	1						A0A498LTT6
	A0A498MRM7	A0A498MAY9		A0A498MRM7		A0A498NJN0		RXN34423.1	RXN34423.1	22.0179		1						A0A498NJN0
	A0A498LB15	A0A498NST7		A0A498LB15		A0A498LFY9		RXN34505.1	A0A498NRA9		25.3965	1						A0A498LFY9
	A0A498LGI9	A0A498P013		A0A498LGI9		A0A498M1Y5		RXN34510.1	A0A498NR16	22.9306	24.5241	0						A0A498M1Y5
	A0A498LBG1	A0A498LWF7		A0A498LBG1		A0A498NC79		RXN34817.1	A0A498NTJ7	24.7478	25.294	0						A0A498NC79
	A0A498MU58	A0A498MRS2		A0A498MU58		A0A498MK50		RXN34839.1	A0A498NTA4	26.4643	26.6512	0						A0A498MK50
	A0A498MVA7	A0A498MHV8		A0A498MVA7		A0A498MWE0		RXN34998.1	A0A498NTG3		23.5583	1						A0A498MWE0
	A0A498MQ50	A0A498N7V6		A0A498MQ50		A0A498LMT6		RXN35182.1	A0A498NSS4		23.9954	1						A0A498LMT6
	A0A498LZT4	A0A498M3E5		A0A498LZT4		A0A498NIA6		RXN35259.1	A0A498NUI3		25.6224	1						A0A498NIA6
	A0A498MHR7	A0A498LC17		A0A498MHR7		A0A498NVP3		RXN36988.1	A0A498MFZ0	23.2111	22.0837	0						A0A498NVP3
	A0A498NB20	A0A498M886		A0A498NB20		A0A498MC72		RXN37196.1	A0A498NZS0	21.6491	26.6305	0						A0A498MC72
	A0A498M5J5	A0A498LNM5		A0A498M5J5		A0A498MRN1		RXN37285.1	A0A498NZA3	24.0861	23.901	0						A0A498MRN1
	A0A498N6M0	A0A498M4W7		A0A498N6M0		A0A498M6W2		RXN37462.1	A0A498NGF1	27.2715	26.0799	0						A0A498M6W2
	A0A498M1Y9	A0A498LHR2		A0A498M1Y9		A0A498N3C5		RXN38532.1	A0A498P1N8		23.0388	1						A0A498N3C5
	A0A498MFZ2	A0A498ML75		A0A498MFZ2		A0A498MNZ0		RXN38595.1	A0A498P307	25.2101	26.0238	0						A0A498MNZ0
	A0A498M1I3	A0A498NKB1		A0A498M1I3		A0A498M537		RXN38976.1	A0A498P4Y1		23.952	1						A0A498M537
	A0A498NJ86	A0A498MM34		A0A498NJ86		A0A498LB59		RXN39269.1	A0A498P6G7	21.5883	25.5958	0						A0A498LB59
	A0A498LDW3	A0A498MYT5		A0A498LDW3		A0A498LI33		RXN02321.1	A0A498L1L1	27.5019		1						A0A498LI33
	A0A498N230	A0A498N1T0		A0A498N230		A0A498N600		RXN02855.1	A0A498LC17		33.085	1						A0A498N600
	A0A498LWH4	A0A498LPF1		A0A498LWH4		A0A498MT24		RXN03352.1	A0A498L4N8		21.2316	1						A0A498MT24
	A0A498LTT6	A0A498N847		A0A498LTT6		A0A498NPF8		RXN03442.1	A0A498L4Y6	23.8431		1						A0A498NPF8
	A0A498NJN0	A0A498NJY6		A0A498NJN0		A0A498MXE5		RXN03807.1	A0A498LDH3		23.5262	1						A0A498MXE5
	A0A498LFY9	A0A498NI83		A0A498LFY9		A0A498LHR7		RXN04327.1	A0A498LF21	23.1931	23.6737	0						A0A498LHR7
	A0A498M1Y5	A0A498MPW7		A0A498M1Y5		A0A498LQR3		RXN05181.1	A0A498L9Z2		22.5923	1						A0A498LQR3
	A0A498NC79	A0A498MYI7		A0A498NC79		A0A498LR20		RXN05914.1	A0A498LGU7		24.071	1						A0A498LR20
	A0A498MK50	A0A498LL25		A0A498MK50		A0A498P6G9		RXN06241.1	A0A498LDA8	26.0477	27.19	0						A0A498P6G9
	A0A498MWE0	A0A498N5X4		A0A498MWE0		A0A498NQU3		RXN06782.1	A0A498LFK8		25.9035	1						A0A498NQU3
	A0A498LMT6	A0A498N3I9		A0A498LMT6		A0A498LSG3		RXN06877.1	A0A498LMU5	23.1583	25.8466	0						A0A498LSG3
	A0A498NIA6	A0A498LLS1		A0A498NIA6		A0A498NEX9		RXN07042.1	A0A498LGJ5	24.9038	26.5542	0						A0A498NEX9
	A0A498NVP3	A0A498MMD0		A0A498NVP3		A0A498L5I4		RXN07145.1	A0A498LP67	26.0191	28.2591	0						A0A498L5I4
	A0A498MC72	A0A498LTW8		A0A498MC72		A0A498N6L6		RXN07949.1	A0A498LHZ4	26.5611	24.0055	0						A0A498N6L6
	A0A498MRN1	A0A498LH41		A0A498MRN1		A0A498N4C6		RXN08041.1	A0A498L5Y4	25.1248	26.5477	0						A0A498N4C6
	A0A498M6W2	A0A498N319		A0A498M6W2		A0A498LD24		RXN08726.1	A0A498LK00	21.5415		1						A0A498LD24
	A0A498N3C5	A0A498MJT8		A0A498N3C5		A0A498MPS8		RXN08773.1	A0A498LMG7	29.1711	28.4442	0						A0A498MPS8
	A0A498MNZ0	A0A498N4C6		A0A498MNZ0		A0A498N460		RXN08839.1	A0A498LKD0	25.9547	26.5926	0						A0A498N460
	A0A498M537	A0A498NL15		A0A498M537		A0A498N1T0		RXN08911.1	A0A498LLL7		23.5957	1						A0A498N1T0
	A0A498LB59	A0A498MHX8		A0A498LB59		A0A498LH19		RXN08990.1	A0A498LL84	25.7272		1						A0A498LH19
	A0A498LI33	A0A498ND87		A0A498LI33		A0A498N637		RXN09174.1	A0A498LR20		30.3454	1						A0A498N637
	A0A498N600	A0A498NNV3		A0A498N600		A0A498NK36		RXN09712.1	A0A498LPK8	21.7423	26.8807	0						A0A498NK36
	A0A498MT24	A0A498L7N5		A0A498MT24		A0A498MIB4		RXN09735.1	A0A498LWK4	24.8192		1						A0A498MIB4
	A0A498NPF8	A0A498NI22		A0A498NPF8		A0A498MBP6		RXN10129.1	A0A498LP20	25.9722		1						A0A498MBP6
	A0A498MXE5	A0A498NRL8		A0A498MXE5		A0A498MW42		RXN10162.1	A0A498LR06	26.9146	29.3532	0						A0A498MW42
	A0A498NJZ3	A0A498NCE6		A0A498NJZ3		A0A498MGP0		RXN10201.1	A0A498LQ34		22.1568	1						A0A498MGP0
	A0A498LHR7	A0A498NKH8		A0A498LHR7		A0A498NDR4		RXN10236.1	A0A498LT02		26.2115	1						A0A498NDR4
	A0A498LQR3	A0A498MJR3		A0A498LQR3		A0A498NTA4		RXN10360.1	A0A498LQB2		25.9621	1						A0A498NTA4
	A0A498LR20	A0A498NP17		A0A498LR20		A0A498M9Z8		RXN10369.1	A0A498LPN6	22.9027	27.3194	0						A0A498M9Z8
	A0A498P6G9	A0A498LTL2		A0A498P6G9		A0A498LSH3		RXN10382.1	A0A498LRP5		28.6031	1						A0A498LSH3
	A0A498NQU3	A0A498MNX5		A0A498NQU3		A0A498M6M7		RXN10815.1	A0A498LZI8	21.9778		1						A0A498M6M7
	A0A498LSG3	A0A498NV34		A0A498LSG3		A0A498L7Q6		RXN11245.1	A0A498M0R9	23.8474		1						A0A498L7Q6
	A0A498NEX9	A0A498LFS7		A0A498NEX9		A0A498LML4		RXN11254.1	A0A498LWN3		23.6331	1						A0A498LML4
	A0A498L5I4	A0A498MLY0		A0A498L5I4		A0A498LJY8		RXN11655.1	A0A498M1W5	24.2987	27.0395	0						A0A498LJY8
	A0A498N6L6	A0A498M0P9		A0A498N6L6		A0A498NHR6		RXN12068.1	A0A498LUD4		26.0897	1						A0A498NHR6
	A0A498N4C6	A0A498N5Y8		A0A498N4C6		A0A498L9T7		RXN12820.1	A0A498LX98	21.4578	26.2555	0						A0A498L9T7
	A0A498LD24	A0A498N0J8		A0A498LD24		A0A498L7A1		RXN14014.1	A0A498M4C1	25.6502		1						A0A498L7A1
	A0A498MPS8	A0A498MZH9		A0A498MPS8		A0A498LZ25		RXN14630.1	A0A498M262		25.6825	1						A0A498LZ25
	A0A498N460	A0A498MZS1		A0A498N460		A0A498NZA9		RXN14856.1	A0A498M5U6	24.8125	24.0432	0						A0A498NZA9
	A0A498N1T0	A0A498LUG3		A0A498N1T0		A0A498MNH5		RXN15331.1	A0A498M459	27.1314	27.8459	0						A0A498MNH5
	A0A498LH19	A0A498LXX1		A0A498LH19		A0A498NPI3		RXN15440.1	A0A498M4J4		24.9443	1						A0A498NPI3
	A0A498N637	A0A498NMY4		A0A498N637		A0A498LQI3		RXN15694.1	A0A498M8Y8		24.4362	1						A0A498LQI3
	A0A498NK36	A0A498LCA5		A0A498NK36		A0A498P5Y7		RXN16125.1	A0A498MF51	27.5493	25.7364	0						A0A498P5Y7
	A0A498MIB4	A0A498NI48		A0A498MIB4		A0A498N8S3		RXN16919.1	A0A498LDV6	20.5424	25.6098	0						A0A498N8S3
	A0A498MBP6	A0A498N1I4		A0A498MBP6		A0A498LZI8		RXN16993.1	A0A498MAX0		25.9061	1						A0A498LZI8
	A0A498MW42	A0A498P5C7		A0A498MW42		A0A498N1H1		RXN17174.1	A0A498MD06		22.2141	1						A0A498N1H1
	A0A498MGP0	A0A498LNV6		A0A498MGP0		A0A498N2F1		RXN17265.1	A0A498LNQ2		27.3162	1						A0A498N2F1
	A0A498NDR4	A0A498L6Z5		A0A498NDR4		A0A498NL83		RXN17309.1	A0A498M8K8		25.2153	1						A0A498NL83
	A0A498NTA4	A0A498MQ09		A0A498NTA4		A0A498NLG8		RXN17549.1	A0A498M948		31.6619	1						A0A498NLG8
	A0A498M9Z8	A0A498N771		A0A498M9Z8		A0A498LNV7		RXN18876.1	A0A498MJ33	26.9024	26.5943	0						A0A498LNV7
	A0A498LSH3	A0A498MY23		A0A498LSH3		A0A498LAN4		RXN18911.1	A0A498MD67	20.3333	23.4701	0						A0A498LAN4
	A0A498M6M7	A0A498LDA8		A0A498M6M7		A0A498N847		RXN19037.1	A0A498MPI7		25.042	1						A0A498N847
	A0A498L7Q6	A0A498NX57		A0A498L7Q6		A0A498N4F4		RXN19133.1	A0A498NX28		28.4674	1						A0A498N4F4
	A0A498LML4	A0A498LU33		A0A498LML4		A0A498MSX4		RXN19265.1	A0A498MQC4	24.0655	29.1507	0						A0A498MSX4
	A0A498M9Z7	A0A498N991		A0A498M9Z7		A0A498NX57		RXN19926.1	A0A498MMK2	20.9628	27.1494	0						A0A498NX57
	A0A498LJY8	A0A498MJ42		A0A498LJY8		A0A498MUL3		RXN20035.1	A0A498MT89	24.4683	29.1381	0						A0A498MUL3
	A0A498NHR6	A0A498MER8		A0A498NHR6		A0A498L675		RXN20080.1	A0A498MIU3	23.5676		1						A0A498L675
	A0A498L9T7	A0A498MVL1		A0A498L9T7		A0A498NR13		RXN20307.1	A0A498LYF0		27.9533	1						A0A498NR13
	A0A498L7A1	A0A498NJN0		A0A498L7A1		A0A498NCL7		RXN20468.1	A0A498MGT9	23.3974	26.631	0						A0A498NCL7
	A0A498LZ25	A0A498N7H5		A0A498LZ25		A0A498N5E0		RXN20797.1	A0A498MVI3	26.8423	25.4749	0						A0A498N5E0
	A0A498NZA9	A0A498MTG5		A0A498NZA9		A0A498LWC4		RXN21151.1	A0A498MJ94		24.5798	1						A0A498LWC4
	A0A498MNH5	A0A498NHT1		A0A498MNH5		A0A498NCA7		RXN21331.1	A0A498MJT0	26.805		1						A0A498NCA7
	A0A498NPI3	A0A498N149		A0A498NPI3		H9C4W5		RXN21392.1	A0A498MP26	24.4891		1						H9C4W5
	A0A498LQI3	A0A498NDB0		A0A498LQI3		A0A498MFM5		RXN21589.1	A0A498MJV6	22.0634		1						A0A498MFM5
	A0A498MC84	A0A498LWI8		A0A498MC84		A0A498MPP4		RXN21785.1	A0A498MZB0		25.3449	1						A0A498MPP4
	A0A498P5Y7	A0A498NHJ6		A0A498P5Y7		A0A498NCZ9		RXN22195.1	A0A498MZZ1		24.9133	1						A0A498NCZ9
	A0A498N8S3	A0A498NLR2		A0A498N8S3		A0A498MYE0		RXN22295.1	A0A498N086	22.2105	23.3707	0						A0A498MYE0
	A0A498LZI8	A0A498NRU8		A0A498LZI8		A0A498MCG5		RXN22591.1	A0A498MP23	27.329		1						A0A498MCG5
	A0A498N1H1	A0A498LG34		A0A498N1H1		A0A498MX98		RXN22644.1	A0A498MTA7	22.056	26.8317	0						A0A498MX98
	A0A498N2F1	A0A498MFH8		A0A498N2F1		A0A498NBJ7		RXN23140.1	A0A498LMP5	25.1871	23.887	0						A0A498NBJ7
	A0A498NL83	A0A498MT24		A0A498NL83		A0A498N102		RXN23618.1	A0A498MQ10	23.3947	26.4146	0						A0A498N102
	A0A498NLG8	A0A498LUF5		A0A498NLG8		A0A498MUK5		RXN23904.1	A0A498MWR2	29.0078	31.1361	0						A0A498MUK5
	A0A498LNV7	A0A498NP10		A0A498LNV7		A0A498LU55		RXN24478.1	A0A498MS83	24.5636	26.4776	0						A0A498LU55
	A0A498LAN4	A0A498P2N6		A0A498LAN4		A0A498MYP0		RXN24532.1	A0A498MYF6	22.0418	26.3938	0						A0A498MYP0
	A0A498M558	A0A498MYQ5		A0A498M558		A0A498M9R3		RXN24760.1	A0A498MVJ2		25.6186	1						A0A498M9R3
	A0A498N847	A0A498N3Y5		A0A498N847		A0A498N9Y6		RXN24828.1	A0A498MT60	25.4457	28.0459	0						A0A498N9Y6
	A0A498N4F4	A0A498MXC3		A0A498N4F4		A0A498LU05		RXN24840.1	A0A498MVQ4	22.7754	26.6622	0						A0A498LU05
	A0A498MSX4	A0A498NSX7		A0A498MSX4		A0A498M8Y8		RXN25012.1	A0A498MZR1		25.4623	1						A0A498M8Y8
	A0A498NX57	A0A498NTC3		A0A498NX57		A0A498N260		RXN25293.1	A0A498MZH9	22.9206	25.591	0						A0A498N260
	A0A498MUL3	A0A498NQC6		A0A498MUL3		A0A498LTA4		RXN25525.1	A0A498N963	21.9442	26.1098	0						A0A498LTA4
	A0A498L675	A0A498N7A4		A0A498L675		A0A498N6U6		RXN25550.1	A0A498MXP6		30.6642	1						A0A498N6U6
	A0A498NR13	A0A498LJT3		A0A498NR13		A0A498LZE6		RXN25904.1	A0A498N2F6		27.0216	1						A0A498LZE6
	A0A498NCL7	A0A498L4B6		A0A498NCL7		A0A498N161		RXN26026.1	A0A498N629	26.7418	23.6125	0						A0A498N161
	A0A498N5E0	A0A498MH76		A0A498N5E0		A0A498MZM9		RXN26263.1	A0A498N280		32.4945	1						A0A498MZM9
	A0A498LWC4	A0A498LFS4		A0A498LWC4		A0A498MM60		RXN26452.1	A0A498N3Q8		23.3823	1						A0A498MM60
	A0A498NCA7	A0A498LFK8		A0A498NCA7		A0A498LWD3		RXN26577.1	A0A498NC80	27.6912		1						A0A498LWD3
	H9C4W5	A0A498MC84		H9C4W5		A0A498LNP9		RXN26781.1	A0A498N1Y3	22.9038		1						A0A498LNP9
	A0A498MFM5	A0A498M809		A0A498MFM5		A0A498NZ12		RXN26974.1	A0A498N5M2		25.9307	1						A0A498NZ12
	A0A498MPP4	A0A498N1E7		A0A498MPP4		A0A498LQJ1		RXN27010.1	A0A498N1T0	22.4562	26.8074	0						A0A498LQJ1
	A0A498NCZ9	A0A498MDE1		A0A498NCZ9		A0A498NUL7		RXN27192.1	A0A498N662	22.4357	26.9781	0						A0A498NUL7
	A0A498MYE0	A0A498LIZ7		A0A498MYE0		A0A498P302		RXN27561.1	A0A498N460		19.4296	1						A0A498P302
	A0A498MCG5	A0A498LGX9		A0A498MCG5		A0A498LNQ8		RXN27612.1	A0A498N7E2	24.127	26.5125	0						A0A498LNQ8
	A0A498MX98	A0A498NC84		A0A498MX98		A0A498LPJ1		RXN27642.1	A0A498N7H5	22.4502	27.5223	0						A0A498LPJ1
	A0A498NBJ7	A0A498N0P4		A0A498NBJ7		A0A498N6P6		RXN27721.1	A0A498N4K4	21.837	22.9817	0						A0A498N6P6
	A0A498N102	A0A498N460		A0A498N102		A0A498MJ07		RXN28672.1	A0A498NA39	22.9116	27.1804	0						A0A498MJ07
	A0A498MUK5	A0A498MSW9		A0A498MUK5		A0A498LRK8		RXN28800.1	A0A498N6V4	25.5709		1						A0A498LRK8
	A0A498LU55	A0A498MZQ6		A0A498LU55		A0A498M7W0		RXN28928.1	A0A498N489	26.2162	31.1329	0						A0A498M7W0
	A0A498MYP0	A0A498MGP0		A0A498MYP0		A0A498LY63		RXN29072.1	A0A498NB21	22.3688	25.5943	0						A0A498LY63
	A0A498M9R3	A0A498N8X6		A0A498M9R3		A0A498LVV4		RXN29106.1	A0A498ND52	23.9208		1						A0A498LVV4
	A0A498N9Y6	A0A498N898		A0A498N9Y6		A0A498N9D3		RXN29698.1	A0A498N6E5		24.7458	1						A0A498N9D3
	A0A498LU05	A0A498LY82		A0A498LU05		A0A498NBJ5		RXN29794.1	A0A498NCP1		22.2317	1						A0A498NBJ5
	A0A498MDY3	A0A498M6K1		A0A498MDY3		A0A498N487		RXN30866.1	A0A498NGA8		27.1463	1						A0A498N487
	A0A498M8Y8	A0A498P465		A0A498M8Y8		A0A498LZG2		RXN30896.1	A0A498NW67	22.244	26.8103	0						A0A498LZG2
	A0A498N260	A0A498L606		A0A498N260		A0A498M8I5		RXN31020.1	A0A498NGQ1	25.1265	23.0889	0						A0A498M8I5
	A0A498LTA4	A0A498LAD7		A0A498LTA4		A0A498NAP7		RXN31370.1	A0A498NHP2	26.9318	26.0384	0						A0A498NAP7
	A0A498N6U6	A0A498NSF9		A0A498N6U6		A0A498N9A6		RXN31500.1	A0A498NI11		24.3849	1						A0A498N9A6
	A0A498LZE6	A0A498P2C7		A0A498LZE6		A0A498MYZ3		RXN31622.1	A0A498NIB6	23.2809	23.7918	0						A0A498MYZ3
	A0A498N161	A0A498P2W9		A0A498N161		A0A498N8I6		RXN31896.1	A0A498NJB3	25.341	25.3535	0						A0A498N8I6
	A0A498MZM9	A0A498MFA4		A0A498MZM9		A0A498N520		RXN31912.1	A0A498L8Q6		25.792	1						A0A498N520
	A0A498MM60	A0A498MPR7		A0A498MM60		A0A498MFQ8		RXN31989.1	A0A498NJN5		27.5319	1						A0A498MFQ8
	A0A498LWD3	A0A498MD47		A0A498LWD3		A0A498LFT5		RXN32721.1	A0A498NLK2	23.5831	30.3403	0						A0A498LFT5
	A0A498LNP9	A0A498M2T9		A0A498LNP9		A0A498MKT8		RXN32774.1	A0A498NM47	24.4723	26.6879	0						A0A498MKT8
	A0A498NZ12	A0A498NJ16		A0A498NZ12		A0A498ND29		RXN32782.1	A0A498NLG1		25.8161	1						A0A498ND29
	A0A498LQJ1	A0A498NA94		A0A498LQJ1		A0A498NEK3		RXN32884.1	A0A498NME5	24.9673		1						A0A498NEK3
	A0A498NUL7	A0A498LTH2		A0A498NUL7		A0A498MVT9		RXN32890.1	A0A498NLN5	27.5489	24.1799	0						A0A498MVT9
	A0A498P302	A0A498NSV6		A0A498P302		A0A498NVQ5		RXN33513.1	A0A498NNN3	25.1691		1						A0A498NVQ5
	A0A498LNQ8	A0A498MB86		A0A498LNQ8		A0A498MAL2		RXN33561.1	A0A498NP17		25.9282	1						A0A498MAL2
	A0A498LPJ1	A0A498NZ94		A0A498LPJ1		A0A498MBT3		RXN33674.1	A0A498NQ36	22.5983		1						A0A498MBT3
	A0A498N6P6	A0A498NQC1		A0A498N6P6		A0A498MY15		RXN33738.1	A0A498NPT3	27.0925	24.8048	0						A0A498MY15
	A0A498MJ07	A0A498NT14		A0A498MJ07		A0A498MA84		RXN33829.1	A0A498NQ53	24.1638	23.9193	0						A0A498MA84
	A0A498LRK8	A0A498MT53		A0A498LRK8		A0A498MTT4		RXN33853.1	A0A498NPL1		27.5378	1						A0A498MTT4
	A0A498M7W0	A0A498N4K6		A0A498M7W0		A0A498L696		RXN34795.1	A0A498NS52		25.1593	1						A0A498L696
	A0A498LY63	A0A498LJH4		A0A498LY63		A0A498N791		RXN34862.1	A0A498NRZ2	23.9072		1						A0A498N791
	A0A498LVV4	A0A498MZN9		A0A498LVV4		A0A498NI22		RXN35249.1	A0A498NUH3	24.9154	29.0761	0						A0A498NI22
	A0A498N9D3	A0A498MK72		A0A498N9D3		A0A498L8L8		RXN35329.1	A0A498NUQ3		25.6749	1						A0A498L8L8
	A0A498NBJ5	A0A498MKU0		A0A498NBJ5		A0A498N148		RXN35416.1	A0A498NUS0		22.8087	1						A0A498N148
	A0A498N487	A0A498NGD5		A0A498N487		A0A498N1Y3		RXN35533.1	A0A498NU86		27.9239	1						A0A498N1Y3
	A0A498LZG2	A0A498NZ89		A0A498LZG2		A0A498LCE5		RXN35990.1	A0A498NV01		23.5833	1						A0A498LCE5
	A0A498M8I5	A0A498LF02		A0A498M8I5		A0A498N717		RXN36334.1	A0A498NYC1		27.5249	1						A0A498N717
	A0A498NAP7	A0A498NWP9		A0A498NAP7		A0A498N3E4		RXN36473.1	A0A498M6L4		21.5613	1						A0A498N3E4
	A0A498N9A6	A0A498M7X2		A0A498N9A6		A0A498MXP6		RXN37232.1	A0A498NY70		23.8755	1						A0A498MXP6
	A0A498MYZ3	A0A498NDH5		A0A498MYZ3		A0A498N0E6		RXN38296.1	A0A498P302		27.5695	1						A0A498N0E6
	A0A498N8I6	A0A498N9R1		A0A498N8I6		A0A498N670		RXN38989.1	A0A498P5M4	23.8329	27.7661	0						A0A498N670
	A0A498N520	A0A498N4C9		A0A498N520		A0A498LG70		RXN39367.1	A0A498P7G2		26.6424	1						A0A498LG70
	A0A498MFQ8	A0A498NK36		A0A498MFQ8		A0A498N499		RXN02462.1	A0A498MIP6	25.4304	26.9184	0						A0A498N499
	A0A498LFT5	A0A498L309		A0A498LFT5		A0A498M118		RXN02713.1	A0A498L5L4	23.1401		1						A0A498M118
	A0A498MKT8	A0A498MWT1		A0A498MKT8		A0A498NBK9		RXN02815.1	A0A498LBX2		28.1984	1						A0A498NBK9
	A0A498ND29	A0A498LEW1		A0A498ND29		A0A498NET8		RXN02949.1	A0A498L3Z8	26.7023	27.259	0						A0A498NET8
	A0A498NEK3	A0A498LQS9		A0A498NEK3		A0A498M7K7		RXN04132.1	A0A498L7A1	26.2917		1						A0A498M7K7
	A0A498MVT9	A0A498ND57		A0A498MVT9		A0A498LN48		RXN04151.1	A0A498L6Z5	24.2668	28.208	0						A0A498LN48
	A0A498NVQ5	A0A498MV13		A0A498NVQ5		A0A498NX28		RXN04440.1	A0A498L7Y3		24.6359	1						A0A498NX28
	A0A498MAL2	A0A498P0P1		A0A498MAL2		A0A498NWE3		RXN04619.1	A0A498L8Q0	22.6753	32.3467	0						A0A498NWE3
	A0A498N9N0	A0A498NYE1		A0A498N9N0		A0A498LT46		RXN05038.1	A0A498LA35	25.005	31.8012	0						A0A498LT46
	A0A498MBT3	A0A498LPK8		A0A498MBT3		A0A498M060		RXN05403.1	A0A498MH32		27.9275	1						A0A498M060
	A0A498MY15	A0A498LBC2		A0A498MY15		A0A498MT06		RXN05672.1	A0A498LBT3		25.0676	1						A0A498MT06
	A0A498MA84	A0A498LHR8		A0A498MA84		A0A498LUF6		RXN06009.1	A0A498LCF8	25.1615	22.4925	0						A0A498LUF6
	A0A498MTT4	A0A498LAU9		A0A498MTT4		A0A498MMU0		RXN06197.1	A0A498LKP9		22.0403	1						A0A498MMU0
	A0A498L696	A0A498NID7		A0A498L696		A0A498N051		RXN06421.1	A0A498LDW2		25.3508	1						A0A498N051
	A0A498N791	A0A498NS04		A0A498N791		A0A498MC86		RXN06551.1	A0A498LE85		25.9174	1						A0A498MC86
	A0A498NI22	A0A498M8I5		A0A498NI22		A0A498NAQ8		RXN07007.1	A0A498LN76		26.6616	1						A0A498NAQ8
	A0A498L8L8	A0A498N3W7		A0A498L8L8		A0A498LRW2		RXN07108.1	A0A498LFM5		25.7794	1						A0A498LRW2
	A0A498N148	A0A498N829		A0A498N148		A0A498NAE3		RXN07111.1	A0A498LG39	21.3856		1						A0A498NAE3
	A0A498N1Y3	A0A498LRQ9		A0A498N1Y3		A0A498M8K9		RXN07158.1	A0A498LFS7		22.0255	1						A0A498M8K9
	A0A498LCE5	A0A498NQL6		A0A498LCE5		A0A498MB16		RXN07295.1	A0A498LPL2	25.9482	31.2892	0						A0A498MB16
	A0A498N717	A0A498MJ08		A0A498N717		A0A498MHF5		RXN07311.1	A0A498LGN8	24.3666	22.9065	0						A0A498MHF5
	A0A498N3E4	A0A498NJD5		A0A498N3E4		A0A498LD75		RXN08496.1	A0A498LN61	29.1285	28.7119	0						A0A498LD75
	A0A498MXP6	A0A498MSI3		A0A498MXP6		A0A498MID9		RXN08957.1	A0A498LU62	25.9163	28.5641	0						A0A498MID9
	A0A498N0E6	A0A498N1Q0		A0A498N0E6		A0A498MWA8		RXN08974.1	A0A498LQI4	25.7657	28.1304	0						A0A498MWA8
	A0A498N670	A0A498LDK9		A0A498N670		A0A498LXQ7		RXN08991.1	A0A498LLT9	28.3716	26.5394	0						A0A498LXQ7
	A0A498LG70	A0A498MYN3		A0A498LG70		A0A498NS09		RXN09249.1	A0A498LLG8	35.7025	31.8484	0						A0A498NS09
	A0A498N499	A0A498ML61		A0A498N499		A0A498MGQ3		RXN09415.1	A0A498LVR3		23.7566	1						A0A498MGQ3
	A0A498M118	A0A498LJ37		A0A498M118		A0A498N7V6		RXN10038.1	A0A498LNL7		21.0136	1						A0A498N7V6
	A0A498NBK9	A0A498LR17		A0A498NBK9		A0A498M3K3		RXN10222.1	A0A498LR76	31.974	37.016	0						A0A498M3K3
	A0A498NET8	A0A498NCQ5		A0A498NET8		A0A498L311		RXN10375.1	A0A498LYA4	24.2936		1						A0A498L311
	A0A498M7K7	A0A498MUK5		A0A498M7K7		A0A498MW00		RXN10575.1	A0A498LYU7	27.9381	28.4955	0						A0A498MW00
	A0A498LN48	A0A498LY84		A0A498LN48		A0A498LP57		RXN11521.1	A0A498LTL5	23.3431		1						A0A498LP57
	A0A498NX28	A0A498LUR8		A0A498NX28		A0A498LBS5		RXN11550.1	A0A498LTV9		23.0478	1						A0A498LBS5
	A0A498NWE3	A0A498LMQ1		A0A498NWE3		A0A498MEZ8		RXN11668.1	A0A498LT82	24.1536	26.0727	0						A0A498MEZ8
	A0A498LT46	A0A498MDY1		A0A498LT46		A0A498NJ76		RXN11773.1	A0A498LVX1	21.0354	27.548	0						A0A498NJ76
	A0A498M060	A0A498MTM1		A0A498M060		A0A498MRB6		RXN11913.1	A0A498LWH2		29.5924	1						A0A498MRB6
	A0A498MT06	A0A498MW44		A0A498MT06		A0A498MWS4		RXN11935.1	A0A498M2P5	22.8288		1						A0A498MWS4
	A0A498MTJ6	A0A498MR33		A0A498MTJ6		A0A498MH85		RXN12089.1	A0A498LUH0		28.0994	1						A0A498MH85
	A0A498LUF6	A0A498MD45		A0A498LUF6		A0A498M6L7		RXN12098.1	A0A498LUG3	21.937	25.6745	0						A0A498M6L7
	A0A498MMU0	A0A498LKG2		A0A498MMU0		A0A498LTD9		RXN12627.1	A0A498M607		25.6274	1						A0A498LTD9
	A0A498N051	A0A498M036		A0A498N051		A0A498MX37		RXN12802.1	A0A498LZJ7	21.949		1						A0A498MX37
	A0A498MC86	A0A498MYC9		A0A498MC86		A0A498N4P6		RXN12892.1	A0A498LJT3	27.9955	27.1922	0						A0A498N4P6
	A0A498NAQ8	A0A498MUR5		A0A498NAQ8		A0A498MVY7		RXN12940.1	A0A498LXI8		26.6608	1						A0A498MVY7
	A0A498LRW2	A0A498N3A3		A0A498LRW2		A0A498M4S7		RXN14055.1	A0A498M8Y5	22.2313		1						A0A498M4S7
	A0A498NAE3	A0A498MHI7		A0A498NAE3		A0A498NP32		RXN14299.1	A0A498NE56	26.8003	22.9333	0						A0A498NP32
	A0A498M8K9	A0A498N817		A0A498M8K9		A0A498MZR4		RXN15504.1	A0A498M8G5	22.8069		1						A0A498MZR4
	A0A498MB16	A0A498ME58		A0A498MB16		A0A498NIC6		RXN15562.1	A0A498L5Q4		21.5568	1						A0A498NIC6
	A0A498MHF5	A0A498LKV8		A0A498MHF5		A0A498NG19		RXN16072.1	A0A498M9J9		26.0756	1						A0A498NG19
	A0A498LD75	A0A498M7H1		A0A498LD75		A0A498LZ52		RXN16082.1	A0A498M9K7		25.9906	1						A0A498LZ52
	A0A498MID9	A0A498MVF3		A0A498MID9		A0A498NDJ7		RXN16850.1	A0A498LFT0		23.6126	1						A0A498NDJ7
	A0A498MWA8	A0A498NC63		A0A498MWA8		A0A498N767		RXN16973.1	A0A498MAV4		25.7441	1						A0A498N767
	A0A498LXQ7	A0A498MQK5		A0A498LXQ7		A0A498MGZ9		RXN17080.1	A0A498NMU3	22.598	29.7669	0						A0A498MGZ9
	A0A498NS09	A0A498L6Y3		A0A498NS09		A0A498N5G5		RXN17816.1	A0A498MFR5		25.8574	1						A0A498N5G5
	A0A498MGQ3	A0A498N127		A0A498MGQ3		A0A498N678		RXN18192.1	A0A498MFQ9		22.2908	1						A0A498N678
	A0A498N7V6	A0A498MFU8		A0A498N7V6		A0A498N7B5		RXN18251.1	A0A498MBF7		25.8945	1						A0A498N7B5
	A0A498M3K3	A0A498LYT4		A0A498M3K3		A0A498M8G5		RXN18774.1	A0A498MHF5		25.9461	1						A0A498M8G5
	A0A498L311	A0A498LLY0		A0A498L311		A0A498N6V4		RXN19069.1	A0A498MD56	24.4583	26.598	0						A0A498N6V4
	A0A498MW00	A0A498NSQ4		A0A498MW00		A0A498LY02		RXN20005.1	A0A498MT53	26.3081		1						A0A498LY02
	A0A498LP57	A0A498MF05		A0A498LP57		A0A498LD80		RXN20261.1	A0A498MGP6	26.3746	24.6916	0						A0A498LD80
	A0A498LBS5	A0A498LAA6		A0A498LBS5		A0A498NRV1		RXN20618.1	A0A498MH55	33.914	31.7137	0						A0A498NRV1
	A0A498MEZ8	A0A498LRN4		A0A498MEZ8		A0A498LEU3		RXN20678.1	A0A498MHB7	22.1886		1						A0A498LEU3
	A0A498NJ76	A0A498N4V5		A0A498NJ76		A0A498LUB5		RXN21367.1	A0A498MXH8	27.8757	29.7397	0						A0A498LUB5
	A0A498MRB6	A0A498NDT6		A0A498MRB6		A0A498MA66		RXN21449.1	A0A498MJC7		26.0023	1						A0A498MA66
	A0A498MWS4	A0A498MKW0		A0A498MWS4		A0A498NAK3		RXN21458.1	A0A498MJD4	24.0129	29.1425	0						A0A498NAK3
	A0A498MH85	A0A498NRG7		A0A498MH85		A0A498LM06		RXN21942.1	A0A498MQQ6	23.5169	23.8025	0						A0A498LM06
	A0A498M6L7	A0A498NJD8		A0A498M6L7		A0A498LPN2		RXN22278.1	A0A498MLK3		27.2607	1						A0A498LPN2
	A0A498LTD9	A0A498MR29		A0A498LTD9		A0A498NEC0		RXN22485.1	A0A498N0S3	22.7606	25.1416	0						A0A498NEC0
	A0A498MX37	A0A498LGU7		A0A498MX37		A0A498NIL5		RXN22619.1	A0A498MMD9	24.4836		1						A0A498NIL5
	A0A498N4P6	A0A498LDM3		A0A498N4P6		A0A498MBE1		RXN22843.1	A0A498MSI0		23.4899	1						A0A498MBE1
	A0A498MVY7	A0A498NA34		A0A498MVY7		A0A498NJT1		RXN23053.1	A0A498MT67	21.1853	29.9997	0						A0A498NJT1
	A0A498M4S7	A0A498N047		A0A498M4S7		A0A498NRA9		RXN23267.1	A0A498N3E3	27.3548	29.2738	0						A0A498NRA9
	A0A498NP32	A0A498MIF8		A0A498NP32		A0A498NSI9		RXN23301.1	A0A498MR96	25.3333		1						A0A498NSI9
	A0A498MZR4	A0A498N899		A0A498MZR4		A0A498LGL5		RXN23432.1	A0A498MUV0	24.3859	24.415	0						A0A498LGL5
	A0A498NIC6	A0A498L6B4		A0A498NIC6		A0A498NAJ1		RXN24125.1	A0A498N5E0	22.2698		1						A0A498NAJ1
	A0A498NG19	A0A498N9W8		A0A498NG19		A0A498MY16		RXN24614.1	A0A498MYL9		22.4693	1						A0A498MY16
	A0A498LC88	A0A498NSU4		A0A498LC88		A0A498NH70		RXN24669.1	A0A498MSK4	24.7228		1						A0A498NH70
	A0A498LZ52	A0A498M6W2		A0A498LZ52		A0A498NSW6		RXN24713.1	A0A498MXZ7	24.8484	25.4665	0						A0A498NSW6
	A0A498NDJ7	A0A498LV64		A0A498NDJ7		A0A498NRY6		RXN24761.1	A0A498MWC6		25.3673	1						A0A498NRY6
	A0A498N767	A0A498MZW6		A0A498N767		A0A498N853		RXN25121.1	A0A498MXC3		24.7384	1						A0A498N853
	A0A498MGZ9	A0A498NFJ7		A0A498MGZ9		A0A498LL74		RXN25212.1	A0A498N0A5		29.0454	1						A0A498LL74
	A0A498N5G5	A0A498LUS4		A0A498N5G5		A0A498LVR7		RXN25316.1	A0A498N459		25.927	1						A0A498LVR7
	A0A498N678	A0A498P1G7		A0A498N678		A0A498M1W3		RXN25356.1	A0A498N4A0		26.0697	1						A0A498M1W3
	A0A498N7B5	A0A498NEU1		A0A498N7B5		A0A498NR97		RXN25431.1	A0A498MY60	21.8715	25.1407	0						A0A498NR97
	A0A498M8G5	A0A498LIJ2		A0A498M8G5		A0A498N3Y5		RXN25509.1	A0A498MUC4	23.4918	25.0287	0						A0A498N3Y5
	A0A498N6V4	A0A498M894		A0A498N6V4		A0A498MAX7		RXN25613.1	A0A498N0E1		21.9875	1						A0A498MAX7
	A0A498LY02	A0A498L2K9		A0A498LY02		A0A498MNI0		RXN25737.1	A0A498NAG6	21.6005	29.0073	0						A0A498MNI0
	A0A498LD80	A0A498MKV0		A0A498LD80		A0A498N9T1		RXN25905.1	A0A498N9Y6	22.7618		1						A0A498N9T1
	A0A498NRV1	A0A498LWX6		A0A498NRV1		A0A498L642		RXN26163.1	A0A498N201	24.4234	28.0168	0						A0A498L642
	A0A498LEU3	A0A498P385		A0A498LEU3		A0A498NAP3		RXN26187.1	A0A498N4G1	25.1644	24.8398	0						A0A498NAP3
	A0A498LUB5	A0A498MWB3		A0A498LUB5		A0A498ML95		RXN26229.1	A0A498MVZ4		25.7379	1						A0A498ML95
	A0A498MA66	A0A498P437		A0A498MA66		A0A498NLT2		RXN26260.1	A0A498MZK9	23.0596	26.0195	0						A0A498NLT2
	A0A498NAK3	A0A498MVS1		A0A498NAK3		A0A498LDC6		RXN26339.1	A0A498MWE6	23.3842	25.1344	0						A0A498LDC6
	A0A498LM06	A0A498L6A5		A0A498LM06		A0A498M3I4		RXN26397.1	A0A498NBW8		24.1269	1						A0A498M3I4
	A0A498N806	A0A498N081		A0A498N806		A0A498LY83		RXN26458.1	A0A498P1K8	20.9787	21.6201	0						A0A498LY83
	A0A498LPN2	A0A498L6L4		A0A498LPN2		A0A498LQN4		RXN26617.1	A0A498NCA7	21.4651	28.9196	0						A0A498LQN4
	A0A498NEC0	A0A498MWS1		A0A498NEC0		A0A498NDV2		RXN26635.1	A0A498NBJ5	23.039		1						A0A498NDV2
	A0A498NIL5	A0A498L6C5		A0A498NIL5		A0A498LP95		RXN26832.1	A0A498N4U7	25.7982	29.0165	0						A0A498LP95
	A0A498MBE1	A0A498MFP4		A0A498MBE1		A0A498M9J6		RXN26845.1	A0A498NBY8	28.0078	24.1037	0						A0A498M9J6
	A0A498NJT1	A0A498LRK8		A0A498NJT1		A0A498NJQ3		RXN26846.1	A0A498N8D7	24.4219	28.3049	0						A0A498NJQ3
	A0A498NRA9	A0A498N7U4		A0A498NRA9		A0A498LHI3		RXN27055.1	A0A498NCB2	21.9173		1						A0A498LHI3
	A0A498NSI9	A0A498N6H2		A0A498NSI9		A0A498NHU8		RXN27266.1	A0A498N9D0	20.7997	28.5813	0						A0A498NHU8
	A0A498LGL5	A0A498MKV5		A0A498LGL5		A0A498LVY4		RXN27672.1	A0A498N6I1		24.2114	1						A0A498LVY4
	A0A498NAJ1	A0A498MXF9		A0A498NAJ1		A0A498NSC4		RXN27708.1	A0A498N0L6	24.2872	23.848	0						A0A498NSC4
	A0A498MY16	A0A498LX10		A0A498MY16		A0A498MT32		RXN27873.1	A0A498N6N5	26.6884	30.883	0						A0A498MT32
	A0A498NH70	A0A498LNR8		A0A498NH70		A0A498LC14		RXN27966.1	A0A498NAW2		20.1392	1						A0A498LC14
	A0A498NSW6	A0A498LK43		A0A498NSW6		A0A498MTB0		RXN28069.1	A0A498N1A5	23.3529		1						A0A498MTB0
	A0A498NRY6	A0A498LQ34		A0A498NRY6		A0A498MHQ4		RXN28070.1	A0A498N4V9	26.3559	30.3867	0						A0A498MHQ4
	A0A498N853	A0A498NCZ9		A0A498N853		A0A498NLR3		RXN28218.1	A0A498N236	36.5372	40.9101	0						A0A498NLR3
	A0A498LL74	A0A498LTZ8		A0A498LL74		A0A498LVF1		RXN28302.1	A0A498N968	26.178	24.7383	0						A0A498LVF1
	A0A498LVR7	A0A498LBT4		A0A498LVR7		A0A498NSJ3		RXN28620.1	A0A498N6C7		27.7195	1						A0A498NSJ3
	A0A498M1W3	A0A498NBJ3		A0A498M1W3		A0A498NL18		RXN29330.1	A0A498NQ43		26.0422	1						A0A498NL18
	A0A498NR97	A0A498N6B6		A0A498NR97		A0A498NJN8		RXN29635.1	A0A498NF29	24.3191	28.6071	0						A0A498NJN8
	A0A498N3Y5	A0A498N461		A0A498N3Y5		A0A498MP58		RXN29770.1	A0A498N9R5	27.7608		1						A0A498MP58
	A0A498MAX7	A0A498MP51		A0A498MAX7		A0A498P2U5		RXN29872.1	A0A498NCJ1		26.8587	1						A0A498P2U5
	A0A498MNI0	A0A498MHB9		A0A498MNI0		A0A498NUQ3		RXN30186.1	A0A498NED7	27.5473	22.4222	0						A0A498NUQ3
	A0A498N9T1	RXN35982.1		A0A498N9T1		A0A498NFD8		RXN30218.1	A0A498N7R7	22.2228	24.1753	0						A0A498NFD8
	A0A498L642	A0A498M5H6		A0A498L642		A0A498P5C9		RXN30431.1	A0A498NBA2		26.0806	1						A0A498P5C9
	A0A498NAP3	A0A498NP39		A0A498NAP3		A0A498NB91		RXN30591.1	A0A498MVT9	23.8996	28.6864	0						A0A498NB91
	A0A498ML95	A0A498L9H1		A0A498ML95		A0A498M9M2		RXN31093.1	A0A498NGW6	26.2542	26.4383	0						A0A498M9M2
	A0A498NLT2	A0A498MNH3		A0A498NLT2		A0A498P437		RXN31835.1	A0A498NJ31	23.0644	27.8012	0						A0A498P437
	A0A498LDC6	A0A498MXA6		A0A498LDC6		A0A498MWB3		RXN31891.1	A0A498NJ63	21.9744	25.7042	0						A0A498MWB3
	A0A498M3I4	A0A498NBL9		A0A498M3I4		A0A498P385		RXN32400.1	A0A498NKD0	28.6224	21.9349	0						A0A498P385
	A0A498LY83	A0A498MAC3		A0A498LY83		A0A498MCF3		RXN33598.1	A0A498NPE6		23.1936	1						A0A498MCF3
	A0A498LQN4	A0A498M1G4		A0A498LQN4		A0A498MVS1		RXN34068.1	A0A498NQN9		23.3106	1						A0A498MVS1
	A0A498NDV2	A0A498MUU2		A0A498NDV2		A0A498L6C5		RXN34504.1	A0A498NSI9		24.5687	1						A0A498L6C5
	A0A498LP95	A0A498N769		A0A498LP95		A0A498MCZ8		RXN34548.1	A0A498NS04		26.0686	1						A0A498MCZ8
	A0A498M9J6	A0A498LUF9		A0A498M9J6		A0A498L6L4		RXN34608.1	A0A498NS65		26.5685	1						A0A498L6L4
	A0A498NJQ3	A0A498MAC6		A0A498NJQ3		A0A498L6A5		RXN34937.1	A0A498NTX3		22.4709	1						A0A498L6A5
	A0A498LHI3	A0A498LJL9		A0A498LHI3		A0A498LJ09		RXN35025.1	A0A498NSQ3		26.9467	1						A0A498LJ09
	A0A498NHU8	A0A498LB15		A0A498NHU8		A0A498MWS1		RXN35463.1	A0A498NU21	26.6339		1						A0A498MWS1
	A0A498LVY4	A0A498LGI9		A0A498LVY4		A0A498N081		RXN35466.1	A0A498NUW6	26.971	26.6774	0						A0A498N081
	A0A498NSC4	A0A498NI21		A0A498NSC4		A0A498MSP0		RXN36502.1	A0A498NWE3		27.9728	1						A0A498MSP0
	A0A498MT32	A0A498LRP6		A0A498MT32		A0A498LEH5		RXN37275.1	A0A498NZ94	28.6186		1						A0A498LEH5
	A0A498LC14	A0A498LQH8		A0A498LC14		A0A498LJ34		RXN02438.1	A0A498L2U2	23.1158	26.2428	0						A0A498LJ34
	A0A498MTB0	A0A498N9F4		A0A498MTB0		A0A498MT19		RXN03819.1	A0A498L6D9	26.739		1						A0A498MT19
	A0A498MHQ4	A0A498N637		A0A498MHQ4		A0A498N0Q6		RXN04680.1	A0A498L8L8	21.8181	23.374	0						A0A498N0Q6
	A0A498NLR3	A0A498LZX9		A0A498NLR3		A0A498MRR5		RXN05583.1	A0A498LDT8	27.1348	27.1605	0						A0A498MRR5
	A0A498LVF1	A0A498M5L2		A0A498LVF1		A0A498N817		RXN06310.1	A0A498LDJ8		23.7953	1						A0A498N817
	A0A498NSJ3	A0A498NIT1		A0A498NSJ3		A0A498NK49		RXN06332.1	A0A498LDT5	23.2149	29.1923	0						A0A498NK49
	A0A498NL18	A0A498NMS4		A0A498NL18		A0A498MLV3		RXN06930.1	A0A498MSB4	27.176	30.8791	0						A0A498MLV3
	A0A498NJN8	A0A498LZT4		A0A498NJN8		A0A498MER3		RXN07126.1	A0A498LJ97	23.8792	23.2938	0						A0A498MER3
	A0A498MP58	A0A498MUH1		A0A498MP58		A0A498LR71		RXN07330.1	A0A498LGM3		26.9654	1						A0A498LR71
	A0A498P2U5	A0A498MB54		A0A498P2U5		A0A498N0U2		RXN07649.1	A0A498LH59	26.492	27.6538	0						A0A498N0U2
	A0A498NUQ3	A0A498MRB6		A0A498NUQ3		A0A498NED6		RXN07897.1	A0A498MFA2	23.7654	21.9459	0						A0A498NED6
	A0A498NYD2	A0A498P3E9		A0A498NYD2		A0A498MGZ5		RXN08660.1	A0A498LKB6	27.9347	28.3869	0						A0A498MGZ5
	A0A498NFD8	A0A498MBS7		A0A498NFD8		A0A498NRK2		RXN08708.1	A0A498LK20		26.2482	1						A0A498NRK2
	A0A498P5C9	A0A498NFZ8		A0A498P5C9		A0A498N353		RXN08771.1	A0A498LL89	22.7334	24.1802	0						A0A498N353
	A0A498NB91	A0A498N280		A0A498NB91		A0A498MX93		RXN08815.1	A0A498LTW8	22.6396	26.2835	0						A0A498MX93
	A0A498M9M2	A0A498MCY1		A0A498M9M2		A0A498N4U5		RXN09079.1	A0A498LL08		27.6333	1						A0A498N4U5
	A0A498P437	A0A498MMU0		A0A498P437		A0A498M3E5		RXN09354.1	A0A498LRI3	25.1892	23.9404	0						A0A498M3E5
	A0A498MWB3	A0A498MTJ6		A0A498MWB3		A0A498MX40		RXN09718.1	A0A498LMR9	21.3069	24.8068	0						A0A498MX40
	A0A498P385	A0A498NFT9		A0A498P385		A0A498MSP6		RXN09719.1	A0A498LMW6	28.0583	27.7101	0						A0A498MSP6
	A0A498MCF3	A0A498LC88		A0A498MCF3		A0A498NP43		RXN10248.1	A0A498LP95	27.7303		1						A0A498NP43
	A0A498MVS1	A0A498MT06		A0A498MVS1		A0A498NDS9		RXN11202.1	A0A498L8L0	22.436		1						A0A498NDS9
	A0A498L6C5	A0A498NCT8		A0A498L6C5		A0A498NF89		RXN11319.1	A0A498LSC4	29.1065	27.0665	0						A0A498NF89
	A0A498MCZ8	A0A498M970		A0A498MCZ8		A0A498MZ96		RXN11403.1	A0A498LUV3		26.2599	1						A0A498MZ96
	A0A498MFP4	A0A498MLP7		A0A498MFP4		A0A498NTU5		RXN11812.1	A0A498LW93		24.5033	1						A0A498NTU5
	A0A498L6L4	A0A498NQT6		A0A498L6L4		A0A498NSP8		RXN11973.1	A0A498LWN4		25.6523	1						A0A498NSP8
	A0A498L6A5	A0A498MYJ2		A0A498L6A5		A0A498NUG2		RXN12396.1	A0A498LYV2		24.118	1						A0A498NUG2
	A0A498LJ09	A0A498MCX4		A0A498LJ09		A0A498LL15		RXN12535.1	A0A498M4G6		23.3684	1						A0A498LL15
	A0A498MWS1	A0A498LTT6		A0A498MWS1		A0A498NTM4		RXN12561.1	A0A498LWG8	22.9604	24.3842	0						A0A498NTM4
	A0A498N081	A0A498LVR7		A0A498N081		A0A498LLG8		RXN12793.1	A0A498LZ25	24.2033	25.7299	0						A0A498LLG8
	A0A498MSP0	A0A498N4W3		A0A498MSP0		A0A498NUH6		RXN12794.1	A0A498M147	27.56	33.6812	0						A0A498NUH6
	A0A498LEH5	A0A498M1C4		A0A498LEH5		A0A498NJR7		RXN12829.1	A0A498LWF7		24.6725	1						A0A498NJR7
	A0A498LJ34	A0A498LQI5		A0A498LJ34		A0A498LDT8		RXN13301.1	A0A498LYJ4	21.8883		1						A0A498LDT8
	A0A498MT19	A0A498LHT9		A0A498MT19		A0A498LRG8		RXN13605.1	A0A498M7K2		25.2257	1						A0A498LRG8
	A0A498N0Q6	A0A498MFP2		A0A498N0Q6		A0A498N3S0		RXN13954.1	A0A498N7B5	25.086	25.3288	0						A0A498N3S0
	A0A498MRR5	A0A498L8T5		A0A498MRR5		A0A498NCD2		RXN13975.1	A0A498M8P4		23.5439	1						A0A498NCD2
	A0A498N817	A0A498MK50		A0A498N817		A0A498LRS8		RXN14037.1	A0A498MA66		31.5748	1						A0A498LRS8
	A0A498NK49	A0A498NC79		A0A498NK49		A0A498MDW3		RXN14348.1	A0A498LRG8	25.1023		1						A0A498MDW3
	A0A498MLV3	A0A498NNY5		A0A498MLV3		A0A498N9R5		RXN14569.1	A0A498M162	26.0542		1						A0A498N9R5
	A0A498MER3	A0A498NVP3		A0A498MER3		A0A498N0M9		RXN15369.1	A0A498M3C3	22.4465	24.2867	0						A0A498N0M9
	A0A498LR71	A0A498LC68		A0A498LR71		A0A498NTT9		RXN15487.1	A0A498MEP5	21.3584		1						A0A498NTT9
	A0A498N0U2	A0A498LG36		A0A498N0U2		A0A498N022		RXN16015.1	A0A498LLF6		22.3762	1						A0A498N022
	A0A498NED6	A0A498N083		A0A498NED6		A0A498MKM0		RXN16166.1	A0A498LDS4	23.7157	26.9448	0						A0A498MKM0
	A0A498MGZ5	A0A498M148		A0A498MGZ5		A0A498MU91		RXN16992.1	A0A498MC33	23.6581	27.505	0						A0A498MU91
	A0A498NRK2	A0A498NM02		A0A498NRK2		A0A498LVA3		RXN17026.1	A0A498MD47	23.3417	26.9597	0						A0A498LVA3
	A0A498N353	A0A498MRN1		A0A498N353		A0A498LNN9		RXN17114.1	A0A498MCU8	25.522		1						A0A498LNN9
	A0A498MX93	A0A498NGF1		A0A498MX93		A0A498NAW2		RXN17150.1	A0A498MVQ1	25.8791	27.8433	0						A0A498NAW2
	A0A498N4U5	A0A498MU58		A0A498N4U5		A0A498NAY0		RXN17743.1	A0A498MD49	22.1763	24.7372	0						A0A498NAY0
	A0A498M3E5	A0A498M537		A0A498M3E5		A0A498MVZ3		RXN17837.1	A0A498MLI9	26.3835	26.4013	0						A0A498MVZ3
	A0A498MX40	A0A498MIB9		A0A498MX40		A0A498MUC9		RXN17997.1	A0A498MLY0		24.1285	1						A0A498MUC9
	A0A498MSP6	A0A498MNJ6		A0A498MSP6		A0A498NKN5		RXN18017.1	A0A498MLZ6	29.6224	26.9703	0						A0A498NKN5
	A0A498NP43	A0A498NYB9		A0A498NP43		A0A498MA26		RXN18057.1	A0A498MM36		24.3591	1						A0A498MA26
	A0A498NDS9	A0A498MBC1		A0A498NDS9		A0A498NVE1		RXN18190.1	A0A498MD95		24.6338	1						A0A498NVE1
	A0A498NF89	A0A498LZK0		A0A498NF89		A0A498LLN1		RXN18278.1	A0A498MB05	26.7463	27.0448	0						A0A498LLN1
	A0A498MZ96	A0A498N767		A0A498MZ96		A0A498LDV6		RXN18293.1	A0A498MER3	21.5649	25.814	0						A0A498LDV6
	A0A498NTU5	A0A498NED7		A0A498NTU5		A0A498N629		RXN18384.1	A0A498MG85	26.3125	19.8627	0						A0A498N629
	A0A498NSP8	A0A498LKT3		A0A498NSP8		A0A498LQQ7		RXN19234.1	A0A498MIQ9	23.7963		1						A0A498LQQ7
	A0A498NUG2	A0A498MPS9		A0A498NUG2		A0A498LN85		RXN19280.1	A0A498MGL9	29.4259	29.8004	0						A0A498LN85
	A0A498LL15	A0A498NJQ5		A0A498LL15		A0A498LJT3		RXN20571.1	A0A498MHG4	23.6095	27.2513	0						A0A498LJT3
	A0A498NTM4	A0A498NLD2		A0A498NTM4		A0A498MLX6		RXN20623.1	A0A498MLG0		25.8954	1						A0A498MLX6
	A0A498LLG8	A0A498MXE5		A0A498LLG8		A0A498L5L4		RXN20735.1	A0A498MVT8		30.5201	1						A0A498L5L4
	A0A498NUH6	A0A498L885		A0A498NUH6		A0A498MK68		RXN20781.1	A0A498MI27	23.1161	27.8121	0						A0A498MK68
	A0A498NJR7	A0A498NJQ3		A0A498NJR7		A0A498N3L1		RXN21330.1	A0A498MM46	24.4406	23.839	0						A0A498N3L1
	A0A498LDT8	A0A498LZ25		A0A498LDT8		A0A498MXE0		RXN22302.1	A0A498MRW3		23.5428	1						A0A498MXE0
	A0A498LRG8	A0A498LHR7		A0A498LRG8		A0A498NKS6		RXN22599.1	A0A498MMC0		22.7809	1						A0A498NKS6
	A0A498N3S0	A0A498NHX9		A0A498N3S0		A0A498LSC4		RXN22635.1	A0A498N173		26.9267	1						A0A498LSC4
	A0A498NCD2	A0A498N527		A0A498NCD2		A0A498LTL5		RXN22909.1	A0A498MN46		26.3799	1						A0A498LTL5
	A0A498LRS8	A0A498NTJ8		A0A498LRS8		A0A498LTU8		RXN23018.1	A0A498MNH9	27.5034	25.1167	0						A0A498LTU8
	A0A498MDW3	A0A498N748		A0A498MDW3		A0A498MN94		RXN23089.1	A0A498MNL5		24.3734	1						A0A498MN94
	A0A498N9R5	A0A498NIA2		A0A498N9R5		A0A498MA59		RXN23220.1	A0A498MRY7	21.6639	24.378	0						A0A498MA59
	A0A498N0M9	A0A498LR20		A0A498N0M9		A0A498MU82		RXN23290.1	A0A498LGP1	23.378	31.0302	0						A0A498MU82
	A0A498NTT9	A0A498NM65		A0A498NTT9		A0A498M5S1		RXN23437.1	A0A498NXY1		28.6352	1						A0A498M5S1
	A0A498N022	A0A498MU96		A0A498N022		A0A498N3B3		RXN23557.1	A0A498N487	28.2171	28.5359	0						A0A498N3B3
	A0A498MKM0	A0A498LGH2		A0A498MKM0		A0A498L6B4		RXN23875.1	A0A498N4Q4		26.6007	1						A0A498L6B4
	A0A498MU91	A0A498NBR3		A0A498MU91		A0A498LFT2		RXN24131.1	A0A498MU70	25.0177	27.5958	0						A0A498LFT2
	A0A498LVA3	A0A498NDM4		A0A498LVA3		A0A498M7T0		RXN24522.1	A0A498MYE6	30.2541	27.4006	0						A0A498M7T0
	A0A498LNN9	A0A498NEX9		A0A498LNN9		A0A498NUH2		RXN24558.1	A0A498MSF0	26.8436	27.2241	0						A0A498NUH2
	A0A498NAW2	A0A498NK49		A0A498NAW2		A0A498ML35		RXN24696.1	A0A498N2G0		26.5166	1						A0A498ML35
	A0A498NAY0	A0A498N6D1		A0A498NAY0		A0A498LH90		RXN24841.1	A0A498MWJ6	22.525	25.7777	0						A0A498LH90
	A0A498MVZ3	A0A498LD24		A0A498MVZ3		A0A498NBE3		RXN25836.1	A0A498N5K8		26.1349	1						A0A498NBE3
	A0A498MUC9	A0A498MVB8		A0A498MUC9		A0A498MMI0		RXN26009.1	A0A498MVF6		22.9114	1						A0A498MMI0
	A0A498NKN5	A0A498NGD2		A0A498NKN5		A0A498MGN9		RXN26295.1	A0A498NAT0		22.2341	1						A0A498MGN9
	A0A498MA26	A0A498N951		A0A498MA26		A0A498MUT6		RXN26308.1	A0A498MWM1		26.1517	1						A0A498MUT6
	A0A498NVE1	A0A498MPS8		A0A498NVE1		A0A498NIE7		RXN26396.1	A0A498N739		23.3851	1						A0A498NIE7
	A0A498LLN1	A0A498LE30		A0A498LLN1		A0A498LUU1		RXN26562.1	A0A498N415	21.9751		1						A0A498LUU1
	A0A498LDV6	A0A498LE76		A0A498LDV6		A0A498NPR3		RXN26621.1	A0A498N1I5		26.987	1						A0A498NPR3
	A0A498N629	A0A498LN85		A0A498N629		A0A498LDT5		RXN26645.1	A0A498NBJ7		28.1468	1						A0A498LDT5
	A0A498LQQ7	A0A498LZ12		A0A498LQQ7		A0A498MP37		RXN26993.1	A0A498N464		21.8315	1						A0A498MP37
	A0A498LN85	A0A498MVA6		A0A498LN85		A0A498LSJ7		RXN27361.1	A0A498N3M1	26.3241	31.1949	0						A0A498LSJ7
	A0A498LJT3	A0A498LJS5		A0A498LJT3		A0A498NNQ1		RXN27693.1	A0A498N668	23.8717		1						A0A498NNQ1
	A0A498MLX6	A0A498NIA6		A0A498MLX6		A0A498M809		RXN27772.1	A0A498N7W1		26.9274	1						A0A498M809
	A0A498L5L4	A0A498MIB4		A0A498L5L4		A0A498NGP6		RXN27820.1	A0A498N453		24.0084	1						A0A498NGP6
	A0A498MK68	A0A498MW42		A0A498MK68		A0A498M162		RXN27931.1	A0A498N571	24.7992		1						A0A498M162
	A0A498N3L1	A0A498N1L7		A0A498N3L1		A0A498LE50		RXN28025.1	A0A498NDR9	23.2481		1						A0A498LE50
	A0A498MXE0	A0A498M9Z8		A0A498MXE0		A0A498MLW3		RXN28235.1	A0A498MR44		23.7301	1						A0A498MLW3
	A0A498NKS6	A0A498NTA4		A0A498NKS6		A0A498MJY7		RXN28369.1	A0A498N220	25.695	31.9489	0						A0A498MJY7
	A0A498LSC4	A0A498NDR4		A0A498LSC4		A0A498LU62		RXN28614.1	A0A498NA52	24.4889		1						A0A498LU62
	A0A498LTL5	A0A498MS66		A0A498LTL5		A0A498NGA8		RXN28705.1	A0A498NED9	25.1213		1						A0A498NGA8
	A0A498LTU8	A0A498N8W5		A0A498LTU8		A0A498LHU8		RXN29019.1	A0A498N3Q3		25.82	1						A0A498LHU8
	A0A498MN94	A0A498L7Q6		A0A498MN94		A0A498L3Z8		RXN29108.1	A0A498N4R1		26.228	1						A0A498L3Z8
	A0A498MA59	A0A498M6M7		A0A498MA59		A0A498NFH4		RXN29205.1	A0A498NET5	22.1242	28.7676	0						A0A498NFH4
	A0A498MU82	A0A498NR51		A0A498MU82		A0A498N4K0		RXN29784.1	A0A498NCN4	22.7618	23.0606	0						A0A498N4K0
	A0A498M5S1	A0A498MWD6		A0A498M5S1		A0A498MYU8		RXN29901.1	A0A498NA34	26.8704		1						A0A498MYU8
	A0A498N3B3	A0A498MHP3		A0A498N3B3		A0A498N220		RXN30176.1	A0A498NED4	25.5131	24.4085	0						A0A498N220
	A0A498L6B4	A0A498N6L6		A0A498L6B4		A0A498LP67		RXN30783.1	A0A498LFI5	25.1046	23.0963	0						A0A498LP67
	A0A498LFT2	A0A498MHQ4		A0A498LFT2		A0A498MZG2		RXN30936.1	A0A498NGH7	27.3467	25.4001	0						A0A498MZG2
	A0A498M7T0	A0A498MKZ5		A0A498M7T0		A0A498M2X6		RXN31009.1	A0A498NGP6	25.6818	27.9949	0						A0A498M2X6
	A0A498NUH2	A0A498M9Z7		A0A498NUH2		A0A498P1B3		RXN31276.1	A0A498NHG6		24.0649	1						A0A498P1B3
	A0A498ML35	A0A498L7A1		A0A498ML35		A0A498MKU4		RXN31379.1	A0A498NHT1	23.9955	25.2376	0						A0A498MKU4
	A0A498LH90	A0A498L9T7		A0A498LH90		A0A498L4P6		RXN31492.1	A0A498NM51	25.2814	29.4079	0						A0A498L4P6
	A0A498NBE3	A0A498NHR6		A0A498NBE3		A0A498MD14		RXN31840.1	A0A498NIT8	25.615	24.5483	0						A0A498MD14
	A0A498MMI0	A0A498M5W8		A0A498MMI0		A0A498MYM4		RXN32019.1	A0A498NJS0		26.556	1						A0A498MYM4
	A0A498MGN9	A0A498MXP5		A0A498MGN9		A0A498NG15		RXN32045.1	A0A498NJN8		25.5554	1						A0A498NG15
	A0A498MUT6	A0A498NZA9		A0A498MUT6		A0A498LGY5		RXN32071.1	A0A498NJP2	25.0211	27.0613	0						A0A498LGY5
	A0A498NIE7	A0A498M2U1		A0A498NIE7		A0A498LBR0		RXN32228.1	A0A498NK38	25.9986	27.4828	0						A0A498LBR0
	A0A498LUU1	A0A498MJ23		A0A498LUU1		A0A498LIX0		RXN32604.1	A0A498MCN8	22.1868	24.9176	0						A0A498LIX0
	A0A498NP31	A0A498NBN5		A0A498NP31		A0A498LMR7		RXN32902.1	A0A498NLR3		27.7818	1						A0A498LMR7
	A0A498NPR3	A0A498MER3		A0A498NPR3		A0A498LYU7		RXN33458.1	A0A498NNV5	25.3553	26.9439	0						A0A498LYU7
	A0A498LDT5	A0A498NIR2		A0A498LDT5		A0A498NGQ8		RXN33501.1	A0A498NNV7	25.4077	25.9602	0						A0A498NGQ8
	A0A498MP37	A0A498NRH5		A0A498MP37		A0A498MXB6		RXN33673.1	A0A498NP50	22.9247	26.4989	0						A0A498MXB6
	A0A498LSJ7	A0A498NUL7		A0A498LSJ7		A0A498ND52		RXN33899.1	A0A498NQC1	25.6148	29.5239	0						A0A498ND52
	A0A498NNQ1	A0A498LQR3		A0A498NNQ1		A0A498N3S1		RXN34610.1	A0A498LA61	23.0146	26.5912	0						A0A498N3S1
	A0A498M809	A0A498MJY7		A0A498M809		A0A498LJB0		RXN34833.1	A0A498NSC4	23.3639		1						A0A498LJB0
	A0A498NGP6	A0A498MRJ0		A0A498NGP6		A0A498LG57		RXN34863.1	A0A498NSE9	25.0679	22.7348	0						A0A498LG57
	A0A498M162	A0A498MBM2		A0A498M162		A0A498NNC2		RXN35225.1	A0A498NT72	25.3093		1						A0A498NNC2
	A0A498LE50	A0A498NL83		A0A498LE50		A0A498LNL7		RXN35261.1	A0A498NTN3		25.4628	1						A0A498LNL7
	A0A498MLW3	A0A498MZ96		A0A498MLW3		A0A498LH75		RXN35437.1	A0A498NVE1	26.1763	28.2817	0						A0A498LH75
	A0A498MJY7	A0A498NLT2		A0A498MJY7		A0A498M4C1		RXN36276.1	A0A498NX57	25.3318	29.8549	0						A0A498M4C1
	A0A498LU62	A0A498P2U5		A0A498LU62		A0A498NP11		RXN03772.1	A0A498L5Z7		24.0314	1						A0A498NP11
	A0A498NGA8	A0A498LU11		A0A498NGA8		A0A498N5C0		RXN04109.1	A0A498L766		24.7184	1						A0A498N5C0
	A0A498LHU8	A0A498NLG8		A0A498LHU8		A0A498N383		RXN04984.1	A0A498LEJ3		28.681	1						A0A498N383
	A0A498L3Z8	A0A498NL60		A0A498L3Z8		A0A498N211		RXN05288.1	A0A498LAT7	25.8117	26.8245	0						A0A498N211
	A0A498NFH4	A0A498N6K7		A0A498NFH4		A0A498MBS7		RXN05393.1	A0A498LDC1	27.7548	22.7959	0						A0A498MBS7
	A0A498N4K0	A0A498NGA8		A0A498N4K0		A0A498N834		RXN05521.1	A0A498LB15	23.2061	21.7104	0						A0A498N834
	A0A498MYU8	A0A498M3Y5		A0A498MYU8		A0A498LNC0		RXN05925.1	A0A498LKG8	24.8726		1						A0A498LNC0
	A0A498N220	A0A498L675		A0A498N220		A0A498LHZ4		RXN06434.1	A0A498LE30		24.397	1						A0A498LHZ4
	A0A498LP67	A0A498MPP4		A0A498LP67		A0A498NUD0		RXN06897.1	A0A498LMW5	26.5034	25.1183	0						A0A498NUD0
	A0A498MZG2	A0A498MCG5		A0A498MZG2		A0A498NL15		RXN07028.1	A0A498LFE6	23.1085	23.9494	0						A0A498NL15
	A0A498M2X6	A0A498LY18		A0A498M2X6		A0A498MUV0		RXN07238.1	A0A498LG03		23.9702	1						A0A498MUV0
	A0A498P1B3	A0A498MMC0		A0A498P1B3		A0A498NT54		RXN07281.1	A0A498LGL1		21.4011	1						A0A498NT54
	A0A498MKU4	A0A498N102		A0A498MKU4		A0A498N804		RXN07394.1	A0A498LL15	26.9457	24.6914	0						A0A498N804
	A0A498L4P6	A0A498MNX8		A0A498L4P6		A0A498NT66		RXN07536.1	A0A498LKJ5	24.6995	25.2007	0						A0A498NT66
	A0A498MD14	A0A498MSN7		A0A498MD14		A0A498LNI8		RXN07621.1	A0A498LHR7	25.8318	29.9036	0						A0A498LNI8
	A0A498MYM4	A0A498P4V9		A0A498MYM4		A0A498MD60		RXN08569.1	A0A498LJP4		24.5747	1						A0A498MD60
	A0A498NG15	A0A498MDY3		A0A498NG15		A0A498NJL7		RXN08984.1	A0A498LQJ3		24.5311	1						A0A498NJL7
	A0A498LGY5	A0A498M8Y8		A0A498LGY5		A0A498NTU1		RXN09421.1	A0A498LMZ1	22.1028	26.7602	0						A0A498NTU1
	A0A498LBR0	A0A498N260		A0A498LBR0		A0A498MFZ3		RXN09923.1	A0A498LQI3	22.0918	27.2718	0						A0A498MFZ3
	A0A498LIX0	A0A498LTA4		A0A498LIX0		A0A498N6B9		RXN10044.1	A0A498LTD9	25.7109	28.7404	0						A0A498N6B9
	A0A498LMR7	A0A498LT59		A0A498LMR7		A0A498MVQ1		RXN10336.1	A0A498LT86	30.6209	32.7626	0						A0A498MVQ1
	A0A498LYU7	A0A498LU55		A0A498LYU7		A0A498MT60		RXN10576.1	A0A498LTY5	21.2028		1						A0A498MT60
	A0A498NGQ8	A0A498MYP0		A0A498NGQ8		A0A498MRG4		RXN10698.1	A0A498LQJ5	24.5784	22.7016	0						A0A498MRG4
	A0A498MXB6	A0A498LU05		A0A498MXB6		A0A498MWJ6		RXN11042.1	A0A498LPC1		25.4567	1						A0A498MWJ6
	A0A498ND52	A0A498N9Y6		A0A498ND52		A0A498MVQ4		RXN11220.1	A0A498LSW6	21.2351	27.6753	0						A0A498MVQ4
	A0A498N3S1	A0A498M9R3		A0A498N3S1		A0A498MWW0		RXN11298.1	A0A498LNQ8	22.597	27.8794	0						A0A498MWW0
	A0A498LJB0	A0A498LZE6		A0A498LJB0		A0A498MV98		RXN11919.1	A0A498LU01		25.4447	1						A0A498MV98
	A0A498LG57	A0A498MPI7		A0A498LG57		A0A498NP97		RXN12679.1	A0A498LW32	21.6745		1						A0A498NP97
	A0A498NNC2	A0A498MM60		A0A498NNC2		A0A498MYF3		RXN13532.1	A0A498M1Y0	23.2584	28.3224	0						A0A498MYF3
	A0A498LNL7	A0A498M3K4		A0A498LNL7		A0A498NEM1		RXN13972.1	A0A498LEV5	24.6699	24.9859	0						A0A498NEM1
	A0A498LH75	A0A498N161		A0A498LH75		A0A498N0M1		RXN14844.1	A0A498M6K1		25.3208	1						A0A498N0M1
	A0A498M4C1	A0A498MZM9		A0A498M4C1		A0A498M7J5		RXN15421.1	A0A498M4E4	28.7526	29.3426	0						A0A498M7J5
	A0A498NP11	A0A498M7K2		A0A498NP11		A0A498MMV2		RXN15677.1	A0A498MF85	24.1461		1						A0A498MMV2
	A0A498N5C0	A0A498LRS0		A0A498N5C0		A0A498MP23		RXN15917.1	A0A498MFZ3		23.3754	1						A0A498MP23
	A0A498N383	A0A498MDM8		A0A498N383		A0A498NPT3		RXN16139.1	A0A498M5H6	24.9614		1						A0A498NPT3
	A0A498N211	A0A498N2A3		A0A498N211		A0A498LL84		RXN16368.1	A0A498M637	25.9866		1						A0A498LL84
	A0A498MBS7	A0A498LWD3		A0A498MBS7		A0A498MYT1		RXN16785.1	A0A498LKX7	23.7001	24.3239	0						A0A498MYT1
	A0A498N834	A0A498NZ12		A0A498N834		A0A498MYF6		RXN16863.1	A0A498L1W8		24.2894	1						A0A498MYF6
	A0A498LNC0	A0A498LHW8		A0A498LNC0		A0A498MYZ9		RXN16955.1	A0A498MHW3		23.439	1						A0A498MYZ9
	A0A498LHZ4	A0A498LNQ8		A0A498LHZ4		A0A498N8T3		RXN16968.1	A0A498M7Q3	27.2758		1						A0A498N8T3
	A0A498NUD0	A0A498LPJ1		A0A498NUD0		A0A498MWI2		RXN17028.1	A0A498M7W0	26.7331	27.8169	0						A0A498MWI2
	A0A498NL15	A0A498LVV4		A0A498NL15		A0A498NE60		RXN17043.1	A0A498MB16		24.4746	1						A0A498NE60
	A0A498MUV0	A0A498MJ07		A0A498MUV0		A0A498NT72		RXN17158.1	A0A498M886	27.8057	29.0261	0						A0A498NT72
	A0A498NT54	A0A498M7W0		A0A498NT54		A0A498NCN4		RXN17216.1	A0A498MDP7	27.5912	26.8002	0						A0A498NCN4
	A0A498N804	A0A498LY63		A0A498N804		A0A498LJ97		RXN17326.1	A0A498MDZ5	24.1036	26.1874	0						A0A498LJ97
	A0A498NT66	A0A498MVT8		A0A498NT66		A0A498MSW6		RXN17535.1	A0A498MJQ9	26.4213	28.4183	0						A0A498MSW6
	A0A498LNI8	A0A498LYF0		A0A498LNI8		A0A498N151		RXN17627.1	A0A498MKX6	27.7295	27.8356	0						A0A498N151
	A0A498MD60	A0A498N487		A0A498MD60		A0A498LD23		RXN17987.1	A0A498MLX6	23.747	29.0704	0						A0A498LD23
	A0A498NJL7	A0A498LWN1		A0A498NJL7		A0A498MZS1		RXN18019.1	A0A498MAC6	26.7093	26.7841	0						A0A498MZS1
	A0A498NTU1	A0A498LGU8		A0A498NTU1		A0A498MEI7		RXN18223.1	A0A498MEK4		25.2518	1						A0A498MEI7
	A0A498MFZ3	A0A498N2D1		A0A498MFZ3		A0A498N3J3		RXN18394.1	A0A498MG97	29.3261	27.5387	0						A0A498N3J3
	A0A498N6B9	A0A498NTA0		A0A498N6B9		A0A498MSF0		RXN18408.1	A0A498MBC1	22.7004	26.4857	0						A0A498MSF0
	A0A498MVQ1	A0A498LZG2		A0A498MVQ1		A0A498M0I6		RXN19723.1	A0A498MIW9	23.3883	25.6462	0						A0A498M0I6
	A0A498MT60	A0A498NAP7		A0A498MT60		A0A498MXZ5		RXN19725.1	A0A498MRT9	21.0166	26.8126	0						A0A498MXZ5
	A0A498MRG4	A0A498MYZ3		A0A498MRG4		A0A498MCU4		RXN20055.1	A0A498MTB9		23.3417	1						A0A498MCU4
	A0A498MWJ6	A0A498N8I6		A0A498MWJ6		A0A498M4T8		RXN20734.1	A0A498MN03	25.9981	25.3198	0						A0A498M4T8
	A0A498MVQ4	A0A498N9A6		A0A498MVQ4		A0A498MKQ1		RXN20819.1	A0A498MHP4	23.8093	26.866	0						A0A498MKQ1
	A0A498MWW0	A0A498MKT8		A0A498MWW0		A0A498L319		RXN20835.1	A0A498MW42	26.405		1						A0A498L319
	A0A498MV98	A0A498ND29		A0A498MV98		A0A498MUF4		RXN20955.1	A0A498MWD3	21.6798	20.5771	0						A0A498MUF4
	A0A498NP97	A0A498NEK3		A0A498NP97		A0A498NUH3		RXN21077.1	A0A498MWA8	24.0629	27.8156	0						A0A498NUH3
	A0A498MYF3	A0A498MVT9		A0A498MYF3		A0A498LAN3		RXN21329.1	A0A498MJ13	28.9559	27.5118	0						A0A498LAN3
	A0A498NEM1	A0A498NVQ5		A0A498NEM1		A0A498LI49		RXN21337.1	A0A498MXE0	22.9494		1						A0A498LI49
	A0A498N0M1	A0A498NDV2		A0A498N0M1		A0A498NRB8		RXN21391.1	A0A498MJY7	21.917	25.6771	0						A0A498NRB8
	A0A498M7J5	A0A498MAL2		A0A498M7J5		A0A498LNK7		RXN21542.1	A0A498MPI0	23.9465	26.1307	0						A0A498LNK7
	A0A498MMV2	A0A498L6W7		A0A498MMV2		A0A498MJT0		RXN21545.1	A0A498MY16		27.6361	1						A0A498MJT0
	A0A498MP23	A0A498MY15		A0A498MP23		A0A498M970		RXN21628.1	A0A498MJS7	25.5145	27.0948	0						A0A498M970
	A0A498NPT3	A0A498L696		A0A498NPT3		A0A498LHR8		RXN22120.1	A0A498LGP3		25.1813	1						A0A498LHR8
	A0A498LL84	A0A498N791		A0A498LL84		A0A498M459		RXN22214.1	A0A498MS62	25.9921	27.3049	0						A0A498M459
	A0A498MYT1	A0A498MTT4		A0A498MYT1		A0A498MV07		RXN22687.1	A0A498N1M6		22.9191	1						A0A498MV07
	A0A498MYF6	A0A498LDH5		A0A498MYF6		A0A498LGC2		RXN22942.1	A0A498LG84		23.1938	1						A0A498LGC2
	A0A498MYZ9	A0A498NCN4		A0A498MYZ9		A0A498MJX4		RXN23231.1	A0A498MR33	29.1291	33.3531	0						A0A498MJX4
	A0A498N8T3	A0A498MNT9		A0A498N8T3		A0A498LPN6		RXN23509.1	A0A498MPP0	25.3056		1						A0A498LPN6
	A0A498MWI2	A0A498N148		A0A498MWI2		A0A498N9Z4		RXN23655.1	A0A498N471	23.8238	26.6912	0						A0A498N9Z4
	A0A498NE60	A0A498N1Y3		A0A498NE60		A0A498N0X0		RXN24481.1	A0A498MVF3	29.7051	25.7067	0						A0A498N0X0
	A0A498NT72	A0A498N717		A0A498NT72		A0A498MI25		RXN24732.1	A0A498MZ10	27.0434		1						A0A498MI25
	A0A498NCN4	A0A498NWE3		A0A498NCN4		A0A498MU70		RXN24768.1	A0A498MSX6	22.9821		1						A0A498MU70
	A0A498LJ97	A0A498NX28		A0A498LJ97		A0A498NWS8		RXN24777.1	A0A498N834	22.4534	20.949	0						A0A498NWS8
	A0A498MSW6	A0A498LWH2		A0A498MSW6		A0A498LSE6		RXN24921.1	A0A498MWS4		27.5527	1						A0A498LSE6
	A0A498N151	A0A498N3E4		A0A498N151		A0A498NZF6		RXN25683.1	A0A498N0K6		23.5567	1						A0A498NZF6
	A0A498LD23	A0A498LBV4		A0A498LD23		A0A498MXQ9		RXN26410.1	A0A498N001	26.1335	28.1846	0						A0A498MXQ9
	A0A498MZS1	A0A498MXP6		A0A498MZS1		A0A498NLG4		RXN26704.1	A0A498N4V8	27.2707	28.4869	0						A0A498NLG4
	A0A498MEI7	A0A498LG70		A0A498MEI7		A0A498MTQ2		RXN26840.1	A0A498N1A7	26.407	28.0138	0						A0A498MTQ2
	A0A498N3J3	A0A498N0E6		A0A498N3J3		A0A498MS83		RXN26896.1	A0A498N8I6	24.3528		1						A0A498MS83
	A0A498MSF0	A0A498MMK1		A0A498MSF0		A0A498M2G5		RXN27637.1	A0A498NDS9	26.7494	28.5488	0						A0A498M2G5
	A0A498M0I6	A0A498N670		A0A498M0I6		A0A498NDL3		RXN28130.1	A0A498N519		26.5892	1						A0A498NDL3
	A0A498MXZ5	A0A498LLS5		A0A498MXZ5		A0A498MX24		RXN28379.1	A0A498N230	25.8671		1						A0A498MX24
	A0A498MCU4	A0A498M118		A0A498MCU4		A0A498NYB9		RXN28495.1	A0A498NE74	24.335	24.9533	0						A0A498NYB9
	A0A498NSF2	A0A498NBK9		A0A498NSF2		A0A498LD14		RXN28708.1	A0A498N3F6	24.0153	28.9483	0						A0A498LD14
	A0A498M4T8	A0A498NET8		A0A498M4T8		A0A498M043		RXN28821.1	A0A498N7K0	23.2757	24.8945	0						A0A498M043
	A0A498MKQ1	A0A498M7K7		A0A498MKQ1		A0A498LZ34		RXN28841.1	A0A498N7L4	27.8922	27.0592	0						A0A498LZ34
	A0A498L319	A0A498N499		A0A498L319		A0A498NAG9		RXN28995.1	A0A498NEM1	23.1187		1						A0A498NAG9
	A0A498MUF4	A0A498LQL6		A0A498MUF4		A0A498M794		RXN29053.1	A0A498N9Q6	25.8585	25.5736	0						A0A498M794
	A0A498NUH3	A0A498LN48		A0A498NUH3		A0A498NUL0		RXN29099.1	A0A498N3Y5		23.1277	1						A0A498NUL0
	A0A498LAN3	A0A498MCJ8		A0A498LAN3		A0A498NRK1		RXN29505.1	A0A498NF02	26.8614	28.1344	0						A0A498NRK1
	A0A498LI49	A0A498MHM4		A0A498LI49		A0A498LWP3		RXN29629.1	A0A498N5G6	27.8481	25.5325	0						A0A498LWP3
	A0A498NRB8	A0A498LT46		A0A498NRB8		A0A498NPB5		RXN29769.1	A0A498N5U1	27.9388	26.0393	0						A0A498NPB5
	A0A498LNK7	A0A498NGG7		A0A498LNK7		A0A498LYZ7		RXN30384.1	A0A498NDJ7	24.1424	22.9325	0						A0A498LYZ7
	A0A498MJT0	A0A498N051		A0A498MJT0		A0A498NC47		RXN30613.1	A0A498NCT8	28.427	27.8474	0						A0A498NC47
	A0A498M970	A0A498MC86		A0A498M970		A0A498M8N7		RXN30760.1	A0A498NFZ5		25.2098	1						A0A498M8N7
	A0A498LHR8	A0A498NAQ8		A0A498LHR8		A0A498LDF0		RXN30785.1	A0A498NG29		28.6268	1						A0A498LDF0
	A0A498M459	A0A498LRW2		A0A498M459		A0A498MJT7		RXN30794.1	A0A498NGC0		26.5776	1						A0A498MJT7
	A0A498MV07	A0A498NAE3		A0A498MV07		A0A498NNN3		RXN30834.1	A0A498NGG7	26.7654	25.3996	0						A0A498NNN3
	A0A498LGC2	A0A498M8K9		A0A498LGC2		A0A498N3X2		RXN31077.1	A0A498NH70		26.9454	1						A0A498N3X2
	A0A498MJX4	A0A498MB16		A0A498MJX4		A0A498MPE7		RXN31950.1	A0A498NJ41	28.585	29.2792	0						A0A498MPE7
	A0A498LPN6	A0A498MNL5		A0A498LPN6		A0A498MXI8		RXN31951.1	A0A498NJC2	26.5846	27.2298	0						A0A498MXI8
	A0A498N9Z4	A0A498MID9		A0A498N9Z4		A0A498MD24		RXN32054.1	A0A498NK32	27.6989	28.2749	0						A0A498MD24
	A0A498N0X0	A0A498MWA8		A0A498N0X0		A0A498NA85		RXN32147.1	A0A498NKN5	24.8686	21.105	0						A0A498NA85
	A0A498MI25	A0A498NN55		A0A498MI25		A0A498M5L2		RXN32412.1	A0A498NKF0	24.1299	24.571	0						A0A498M5L2
	A0A498MU70	A0A498MJU1		A0A498MU70		A0A498M3C1		RXN32553.1	A0A498NKY3		27.3502	1						A0A498M3C1
	A0A498NWS8	A0A498NS09		A0A498NWS8		A0A498MFB9		RXN32975.1	A0A498LQB7	24.1398	26.6796	0						A0A498MFB9
	A0A498LSE6	A0A498L5N4		A0A498LSE6		A0A498M8P4		RXN33090.1	A0A498NM74		22.0057	1						A0A498M8P4
	A0A498NZF6	A0A498MGQ3		A0A498NZF6		A0A498MEI4		RXN33166.1	A0A498L301	26.1811	24.1431	0						A0A498MEI4
	A0A498MXQ9	A0A498M3K3		A0A498MXQ9		A0A498N1D0		RXN33643.1	A0A498LNW0		27.7411	1						A0A498N1D0
	A0A498NLG4	A0A498N9Q8		A0A498NLG4		A0A498NLG1		RXN33696.1	A0A498NPK0	23.7813	26.6007	0						A0A498NLG1
	A0A498MTQ2	A0A498L311		A0A498MTQ2		A0A498N8C7		RXN34113.1	A0A498NQC6		27.5178	1						A0A498N8C7
	A0A498MS83	A0A498LBS5		A0A498MS83		A0A498MWU9		RXN34553.1	A0A498NRK2	26.0375	23.6527	0						A0A498MWU9
	A0A498M2G5	A0A498NB66		A0A498M2G5		A0A498MAA7		RXN34674.1	A0A498NT28	22.7885	25.7128	0						A0A498MAA7
	A0A498NDL3	A0A498MEZ8		A0A498NDL3		A0A498LHC0		RXN34906.1	A0A498NTC1		24.3269	1						A0A498LHC0
	A0A498MX24	A0A498NJ76		A0A498MX24		A0A498LD43		RXN35142.1	A0A498NSN9	28.1023	28.6501	0						A0A498LD43
	A0A498NYB9	A0A498MWS4		A0A498NYB9		A0A498MSU8		RXN35246.1	A0A498NU90	20.9507	25.4959	0						A0A498MSU8
	A0A498LD14	A0A498NR16		A0A498LD14		A0A498MXF2		RXN35281.1	A0A498NTQ4	29.1892	29.6846	0						A0A498MXF2
	A0A498M043	A0A498MH85		A0A498M043		A0A498N3W7		RXN37201.1	A0A498NZ72	24.6055		1						A0A498N3W7
	A0A498LZ34	A0A498M6L7		A0A498LZ34		A0A0G3F7Z2		RXN38721.1	A0A498P3E8	25.3575	25.0645	0						A0A0G3F7Z2
	A0A498NAG9	A0A498LTD9		A0A498NAG9		A0A498M0X4		RXN39453.1	A0A498P5C9	22.4759	28.2518	0						A0A498M0X4
	A0A498M794	A0A498L4G6		A0A498M794		A0A498NKU7		RXN02673.1	A0A498L5H4	29.1145	32.5091	0						A0A498NKU7
	A0A498NUL0	A0A498MLK4		A0A498NUL0		A0A498LR98		RXN03632.1	A0A498L5J2	23.1069	27.7139	0						A0A498LR98
	A0A498NRK1	A0A498MX37		A0A498NRK1		A0A498N2K6		RXN03759.1	A0A498LIL1		26.617	1						A0A498N2K6
	A0A498LWP3	A0A498N4P6		A0A498LWP3		A0A498N1F7		RXN03844.1	A0A498LBG8	29.0485	29.6156	0						A0A498N1F7
	A0A498NPB5	A0A498MPM1		A0A498NPB5		A0A498LTV8		RXN03890.1	A0A498L6A7	25.3721	29.5565	0						A0A498LTV8
	A0A498LYZ7	A0A498M4S7		A0A498LYZ7		A0A498N9W8		RXN03972.1	A0A498N211	26.7597	26.2225	0						A0A498N9W8
	A0A498NC47	A0A498NP32		A0A498NC47		A0A498N338		RXN03991.1	A0A498L6I4	24.4499	22.0433	0						A0A498N338
	A0A498M8N7	A0A498L3L0		A0A498M8N7		A0A498MTD0		RXN04101.1	A0A498L6U4		24.4163	1						A0A498MTD0
	A0A498LDF0	A0A498M948		A0A498LDF0		A0A498M6L9		RXN04732.1	A0A498L925		28.5037	1						A0A498M6L9
	A0A498MJT7	A0A498NRB8		A0A498MJT7		A0A498NFX0		RXN04990.1	A0A498N3I9	22.8941	25.4316	0						A0A498NFX0
	A0A498NNN3	A0A498N004		A0A498NNN3		A0A498M163		RXN05040.1	A0A498LS50	24.1405		1						A0A498M163
	A0A498N3X2	A0A498LQB2		A0A498N3X2		A0A498NRN3		RXN05209.1	A0A498LAF5		26.6329	1						A0A498NRN3
	A0A498MPE7	A0A498MLZ6		A0A498MPE7		A0A498NI10		RXN05645.1	A0A498LJJ3	22.448	25.9141	0						A0A498NI10
	A0A498MXI8	A0A498M607		A0A498MXI8		A0A498L885		RXN05670.1	A0A498LBP2	26.2318	30.3216	0						A0A498L885
	A0A498MD24	A0A498MR44		A0A498MD24		A0A498NFY8		RXN05685.1	A0A498LVL4	24.3398	28.3178	0						A0A498NFY8
	A0A498NA85	A0A498MAJ5		A0A498NA85		A0A498NCS2		RXN07019.1	A0A498LFI9	28.3022	26.5058	0						A0A498NCS2
	A0A498M5L2	A0A498L3N8		A0A498M5L2		A0A498NMR7		RXN07069.1	A0A498LFN2		23.5037	1						A0A498NMR7
	A0A498M3C1	A0A498NL97		A0A498M3C1		A0A498MRG9		RXN07096.1	A0A498LJ72	24.2752	24.7469	0						A0A498MRG9
	A0A498MFB9	A0A498L3L2		A0A498MFB9		A0A498M1D0		RXN07270.1	A0A498LGG2	26.6069	25.3306	0						A0A498M1D0
	A0A498M8P4	A0A498ME95		A0A498M8P4		A0A498N4Q4		RXN07383.1	A0A498LIJ7		24.0518	1						A0A498N4Q4
	A0A498MEI4	A0A498MM76		A0A498MEI4		A0A498M5W8		RXN07401.1	A0A498LGY1	26.0666	27.3496	0						A0A498M5W8
	A0A498N1D0	A0A498MB48		A0A498N1D0		A0A498NI43		RXN07650.1	A0A498LHJ3	21.8236	27.7263	0						A0A498NI43
	A0A498NLG1	A0A498MD02		A0A498NLG1		A0A498NAN4		RXN07651.1	A0A498LHU8	22.2685	27.2278	0						A0A498NAN4
	A0A498N8C7	A0A498LNJ9		A0A498N8C7		A0A498MVG0		RXN07659.1	A0A498LH75	21.9519	26.3575	0						A0A498MVG0
	A0A498MWU9	A0A498MTE3		A0A498MWU9		A0A498NS33		RXN08075.1	A0A498ME94	24.9763	25.5816	0						A0A498NS33
	A0A498MAA7	A0A498MZR4		A0A498MAA7		A0A498P2L1		RXN08278.1	A0A498LIX0	24.0629	26.36	0						A0A498P2L1
	A0A498LHC0	A0A498NIC6		A0A498LHC0		A0A498MR31		RXN08305.1	A0A498LSF8	22.5387	29.0012	0						A0A498MR31
	A0A498LD43	A0A498NG19		A0A498LD43		A0A498NIB6		RXN08697.1	A0A498ME64		26.0994	1						A0A498NIB6
	A0A498MSU8	A0A498LZ52		A0A498MSU8		A0A498N5G7		RXN08804.1	A0A498LQ23	23.5245	27.2981	0						A0A498N5G7
	A0A498MXF2	A0A498NDJ7		A0A498MXF2		A0A498NGG1		RXN08836.1	A0A498LP40	29.9043	33.2326	0						A0A498NGG1
	A0A498N3W7	A0A498MGZ9		A0A498N3W7		A0A498N5Y0		RXN08958.1	A0A498LKL7	25.3963	24.0266	0						A0A498N5Y0
	A0A0G3F7Z2	A0A498N5G5		A0A0G3F7Z2		A0A498LWA9		RXN09097.1	A0A498LUM0	27.3974	28.3292	0						A0A498LWA9
	A0A498M0X4	A0A498N678		A0A498M0X4		A0A498MEX2		RXN09417.1	A0A498LVS8		19.7808	1						A0A498MEX2
	A0A498NKU7	A0A498N7B5		A0A498NKU7		A0A498M148		RXN09576.1	H9C4W4	28.1662		1						A0A498M148
	A0A498LR98	A0A498LY02		A0A498LR98		A0A498NRC1		RXN09580.1	H9C4W8	22.3874		1						A0A498NRC1
	A0A498N2K6	A0A498LWN3		A0A498N2K6		A0A498NKK1		RXN09636.1	A0A498LRC0		27.2902	1						A0A498NKK1
	A0A498N1F7	A0A498LD80		A0A498N1F7		A0A498M0R9		RXN09641.1	A0A498LNM5	25.4105	28.3514	0						A0A498M0R9
	A0A498LTV8	A0A498MW48		A0A498LTV8		A0A498MG29		RXN09664.1	A0A498LSG3	23.3685		1						A0A498MG29
	A0A498N9W8	A0A498NRV1		A0A498N9W8		A0A498MLA5		RXN09692.1	A0A498LPJ1	25.0386	27.735	0						A0A498MLA5
	A0A498N338	A0A498LEU3		A0A498N338		A0A498LG34		RXN10062.1	A0A498LQP8		26.9782	1						A0A498LG34
	A0A498MTD0	A0A498LUB5		A0A498MTD0		A0A498MG61		RXN10206.1	A0A498LSX2	21.8875	25.9511	0						A0A498MG61
	A0A498M6L9	A0A498LJ34		A0A498M6L9		A0A498M7B3		RXN10213.1	A0A498LRA4	23.3974	28.1841	0						A0A498M7B3
	A0A498NFX0	A0A498LM06		A0A498NFX0		A0A498MJ49		RXN10269.1	A0A498LPF0		27.1919	1						A0A498MJ49
	A0A498M163	A0A498N806		A0A498M163		A0A498NGZ9		RXN10342.1	A0A498LRK8		26.4832	1						A0A498NGZ9
	A0A498NRN3	A0A498LPN2		A0A498NRN3		A0A498MT67		RXN10362.1	A0A498LRM7	24.4994	26.0349	0						A0A498MT67
	A0A498NI10	A0A498NEC0		A0A498NI10		A0A498MJI1		RXN10451.1	A0A498LQS7		26.0508	1						A0A498MJI1
	A0A498L885	A0A498NIL5		A0A498L885		A0A498NPD7		RXN11196.1	A0A498LGY5	25.8687	27.0282	0						A0A498NPD7
	A0A498NFY8	A0A498MBE1		A0A498NFY8		A0A498MGT9		RXN11307.1	A0A498M1S6	27.5651	28.6366	0						A0A498MGT9
	A0A498NCS2	A0A498NJT1		A0A498NCS2		A0A498N6R0		RXN11329.1	A0A498LSD3	28.0726	22.9999	0						A0A498N6R0
	A0A498NMR7	A0A498NRA9		A0A498NMR7		A0A498MK82		RXN11378.1	A0A498LSE6	25.9426	27.1604	0						A0A498MK82
	A0A498MRG9	A0A498NSI9		A0A498MRG9		A0A498NDC8		RXN11515.1	A0A498M1G8	26.3896	28.8409	0						A0A498NDC8
	A0A498M1D0	A0A498LWI4		A0A498M1D0		A0A498NRL8		RXN11541.1	A0A498LTN4		30.3861	1						A0A498NRL8
	A0A498N4Q4	A0A498NAJ1		A0A498N4Q4		A0A498M061		RXN11708.1	A0A498LTB6		27.2884	1						A0A498M061
	A0A498M5W8	A0A498LGL5		A0A498M5W8		A0A498NBL9		RXN11760.1	A0A498LUF5	26.995	30.3585	0						A0A498NBL9
	A0A498NI43	A0A498MY16		A0A498NI43		A0A498NJL8		RXN12290.1	A0A498LVU1	24.8331		1						A0A498NJL8
	A0A498NAN4	A0A498NH70		A0A498NAN4		A0A498MI74		RXN12612.1	A0A498LZ02	28.1378	29.6872	0						A0A498MI74
	A0A498MVG0	A0A498NSW6		A0A498MVG0		A0A498N9H2		RXN12631.1	A0A498LWN1		27.9065	1						A0A498N9H2
	A0A498NS33	A0A498NRY6		A0A498NS33		A0A498LNR8		RXN12776.1	A0A498LZY1	24.7038		1						A0A498LNR8
	A0A498P2L1	A0A498N853		A0A498P2L1		A0A498N4V0		RXN13137.1	A0A498M7H1	22.7839	25.3846	0						A0A498N4V0
	A0A498MR31	A0A498LL74		A0A498MR31		A0A498MZK9		RXN13899.1	A0A498LZA7		25.3885	1						A0A498MZK9
	A0A498NIB6	A0A498MKV7		A0A498NIB6		A0A498MFK6		RXN13988.1	A0A498LZI5		27.5523	1						A0A498MFK6
	A0A498N5G7	A0A498NR97		A0A498N5G7		A0A498N563		RXN14121.1	A0A498L642	29.5955	29.8421	0						A0A498N563
	A0A498NGG1	A0A498LXZ0		A0A498NGG1		A0A498MZQ8		RXN14738.1	A0A498M1Q7		26.0639	1						A0A498MZQ8
	A0A498N5Y0	A0A498M1X3		A0A498N5Y0		A0A498MBR3		RXN14897.1	A0A498MCU4	23.8664		1						A0A498MBR3
	A0A498LWA9	A0A498M2U5		A0A498LWA9		A0A498NSH1		RXN14902.1	A0A498M6I7	21.2856	25.7213	0						A0A498NSH1
	A0A498MEX2	A0A498LY34		A0A498MEX2		A0A498MEX3		RXN15132.1	A0A498M763	25.2246	26.1358	0						A0A498MEX3
	A0A498M148	A0A498M9M2		A0A498M148		A0A498NT34		RXN15355.1	A0A498MCX3		25.8687	1						A0A498NT34
	A0A498NRC1	A0A498MAV4		A0A498NRC1		A0A498MYC4		RXN15553.1	A0A498M6L7	27.2829	29.113	0						A0A498MYC4
	A0A498NKK1	A0A498N1G4		A0A498NKK1		A0A498LQC1		RXN15567.1	A0A498MEW8		26.2823	1						A0A498LQC1
	A0A498M0R9	A0A498LV54		A0A498M0R9		A0A498M7Q3		RXN15665.1	A0A498MDW3	26.5756	26.416	0						A0A498M7Q3
	A0A498MG29	A0A498NT55		A0A498MG29		A0A498LWK4		RXN16028.1	A0A498M566	22.2404	23.3929	0						A0A498LWK4
[truncated: 1,886 more rows]

## Sheet: Input_Ttl_Gonad_PA_2933
Accession	Mix NCBI up	Female gonad	Male gonad
RXN02385.1	A0A498LAL8	0	21.0698
RXN02736.1	A0A498L7E0	28.4125	0
RXN02856.1	A0A498L7Q0	23.6156	0
RXN03258.1	A0A498L582	0	25.2047
RXN03533.1	A0A498L851	0	29.3477
RXN03574.1	A0A498LAS3	0	25.6222
RXN03602.1	A0A498NAG4	0	23.9391
RXN04353.1	A0A498LAH0	0	25.2924
RXN04556.1	A0A498LCA5	0	26.6546
RXN04822.1	A0A498MUQ9	0	22.9628
RXN04995.1	A0A498LHR9	24.81	0
RXN05080.1	A0A498L9N6	0	27.3647
RXN05114.1	A0A498LEW1	0	25.794
RXN05312.1	A0A498MFV2	22.4554	0
RXN05709.1	A0A498LBM4	0	24.5065
RXN05713.1	A0A498LE50	24.7618	0
RXN05724.1	A0A498LGC2	0	22.1144
RXN05734.1	A0A498LGD0	0	24.7785
RXN06564.1	A0A498ML00	0	24.8538
RXN06747.1	A0A498LMG9	32.6531	0
RXN06808.1	A0A498LEV7	27.9329	0
RXN06915.1	A0A498LNH2	25.1672	0
RXN07024.1	A0A498LK22	0	24.438
RXN07107.1	A0A498LNI4	0	26.6325
RXN07219.1	A0A498M870	0	27.056
RXN07540.1	A0A498LH85	0	20.1933
RXN07629.1	A0A498LH44	0	22.0017
RXN07669.1	A0A498LH83	20.6729	0
RXN07997.1	A0A498LR98	24.8329	0
RXN08318.1	A0A498LJ09	25.4581	0
RXN08463.1	A0A498LLP1	32.7229	0
RXN08468.1	A0A498LJD5	28.4289	0
RXN08469.1	A0A498LJD4	32.3412	0
RXN08478.1	A0A498LJE3	0	25.33
RXN08498.1	A0A498LJG1	0	26.9356
RXN08631.1	A0A498NA43	0	27.2245
RXN08733.1	A0A498LNR8	0	27.3176
RXN08910.1	A0A498LL07	24.2517	0
RXN08927.1	A0A498LU33	0	26.7444
RXN09074.1	A0A498LQS9	0	23.8002
RXN09139.1	A0A498LL64	31.956	0
RXN09187.1	A0A498LUW6	22.0892	0
RXN09189.1	A0A498LLA7	0	25.3914
RXN09430.1	A0A498LMQ1	0	25.7199
RXN09507.1	A0A498M4Z4	0	28.5527
RXN09585.1	A0A0G3F7Z2	23.5984	0
RXN09663.1	A0A498LPU9	23.5762	0
RXN10096.1	A0A498LSL9	22.6379	0
RXN10245.1	A0A498LXX1	0	26.7589
RXN10432.1	A0A498LRV0	0	23.3922
RXN10474.1	A0A498LUK4	0	23.5773
RXN10637.1	A0A498LZT4	23.1967	0
RXN10654.1	A0A498LV29	22.5772	0
RXN10955.1	A0A498LZX6	0	23.828
RXN10970.1	A0A498LS24	24.3318	0
RXN11008.1	A0A498MG09	0	26.1193
RXN11024.1	A0A498LVZ3	0	24.3471
RXN11029.1	A0A498LRJ2	0	22.0729
RXN11839.1	A0A498LTT0	0	20.5737
RXN11994.1	A0A498LYP6	0	26.3554
RXN12090.1	A0A498LVB3	0	24.1366
RXN12272.1	A0A498LXV8	30.254	0
RXN12608.1	A0A498LVU3	0	23.7658
RXN12649.1	A0A498P603	0	22.8155
RXN12988.1	A0A498LWR7	23.8899	0
RXN13292.1	A0A498M156	25.119	0
RXN13542.1	A0A498M1Y9	24.8571	0
RXN13569.1	A0A498LYF2	0	25.9464
RXN13966.1	A0A498M3B7	28.3164	0
RXN14085.1	A0A498M981	0	22.3255
RXN14132.1	A0A498M3V9	0	22.5857
RXN14206.1	A0A498M411	0	23.0496
RXN14222.1	A0A498NX65	0	23.8443
RXN14249.1	A0A498M090	22.3789	0
RXN14363.1	A0A498M3D5	23.517	0
RXN14558.1	A0A498M174	23.3147	0
RXN14814.1	A0A498M6I1	0	24.509
RXN14818.1	A0A498M1Y5	24.0407	0
RXN14883.1	A0A498M4T4	0	28.0305
RXN14905.1	A0A498MBK5	0	22.2667
RXN14914.1	A0A498LJR5	23.6099	0
RXN15229.1	A0A498M6R4	0	21.228
RXN15365.1	A0A498MCY1	0	25.2287
RXN15383.1	A0A498M653	0	25.4274
RXN15439.1	A0A498M3J3	0	24.555
RXN15915.1	A0A498MEJ9	24.4586	0
RXN15919.1	A0A498M4X3	0	24.3525
RXN16821.1	A0A498M832	0	22.5873
RXN16906.1	A0A498MCR5	0	22.827
RXN16920.1	A0A498M922	0	24.6825
RXN16984.1	A0A498MCF3	28.4568	0
RXN17201.1	A0A498M8Y2	24.2639	0
RXN17345.1	A0A498MJ46	0	26.6006
RXN17528.1	A0A498M937	21.4317	0
RXN17546.1	A0A498MEX3	24.7874	0
RXN17568.1	A0A498M970	0	31.196
RXN17592.1	A0A498LHD2	0	29.0115
RXN17772.1	A0A498MIW0	0	24.2411
RXN17933.1	A0A498MDM0	22.0418	0
RXN18031.1	A0A498MAX7	25.4472	0
RXN18053.1	A0A498ME33	0	22.3214
RXN18054.1	A0A498MFB7	0	24.593
RXN18227.1	A0A498MMI5	0	27.3351
RXN18315.1	A0A498MMD0	0	23.1391
RXN18346.1	A0A498L5E6	0	24.0299
RXN18729.1	A0A498MCA5	0	22.8258
RXN18918.1	A0A498MCP3	0	24.5309
RXN19090.1	A0A498MG22	0	24.9943
RXN19154.1	A0A498MIG5	35.3089	0
RXN19467.1	A0A498MR48	25.9417	0
RXN19487.1	A0A498MR68	0	21.4592
RXN19881.1	A0A498MFP5	0	23.3628
RXN19996.1	A0A498MMT7	22.7004	0
RXN20257.1	A0A498MTM1	0	25.0409
RXN20311.1	A0A498MGU0	25.2454	0
RXN20316.1	A0A498MNS9	23.98	0
RXN20436.1	A0A498MP71	0	24.1665
RXN20490.1	A0A498MJV5	0	26.8836
RXN20507.1	A0A498MUH1	0	25.6201
RXN20686.1	A0A498MQ24	0	19.7759
RXN20696.1	A0A498MQ31	0	23.4733
RXN20706.1	A0A498MQ34	0	24.719
RXN20786.1	A0A498MQD4	24.5149	0
RXN20975.1	A0A498MWF3	0	24.1956
RXN20992.1	A0A498MN12	21.8623	0
RXN21135.1	A0A498MWW0	0	24.3403
RXN21169.1	A0A498MIM7	0	28.0679
RXN21346.1	A0A498MS76	0	22.1115
RXN21484.1	A0A498MQ42	0	25.6566
RXN21494.1	A0A498MQ49	0	27.8591
RXN21547.1	A0A498MY58	23.4969	0
RXN21549.1	A0A498MJR3	0	23.1123
RXN21560.1	A0A498MMR2	0	29.3756
RXN21648.1	A0A498MJT8	0	19.5382
RXN21665.1	A0A498MYD8	0	24.1977
RXN21751.1	A0A498ML42	0	22.4691
RXN21924.1	A0A498MRG4	23.5042	0
RXN22339.1	A0A498MLP7	0	28.386
RXN22468.1	A0A498MM34	0	26.7791
RXN22471.1	A0A498MNM9	21.4108	0
RXN22801.1	A0A498MPU5	0	21.8864
RXN22844.1	A0A498MTY0	0	26.6912
RXN22848.1	A0A498MN25	0	24.3677
RXN23046.1	A0A498MXS6	23.3725	0
RXN23087.1	A0A498N2W1	0	23.6127
RXN23269.1	A0A498MP45	0	24.5549
RXN23283.1	A0A498MTY9	0	26.0836
RXN23310.1	A0A498MS63	0	24.3062
RXN23515.1	A0A498N3T1	0	26.0236
RXN23652.1	A0A498MVL1	0	26.3124
RXN23774.1	A0A498MWE0	21.6765	0
RXN23789.1	A0A498MQE7	0	24.7594
RXN23816.1	A0A498MZY5	0	27.0053
RXN23858.1	A0A498MQN2	0	23.8813
RXN24074.1	A0A498MX61	0	27.9012
RXN24127.1	A0A498N663	24.7789	0
RXN24448.1	A0A498MS51	0	24.561
RXN24681.1	A0A498MW77	0	24.1828
RXN24789.1	A0A498MSU7	22.7502	0
RXN24873.1	A0A498MYE5	0	26.2584
RXN24923.1	A0A498MYI7	0	28.2796
RXN25331.1	A0A498MXW0	22.3108	0
RXN25583.1	A0A498N0B2	26.5129	0
RXN25617.1	A0A498NA71	0	27.4101
RXN25818.1	A0A498MVF2	23.644	0
RXN25949.1	A0A498MV98	0	27.097
RXN26070.1	A0A498MZ22	31.494	0
RXN26071.1	A0A498MZW7	33.5788	0
RXN26094.1	A0A498LAY5	0	25.8121
RXN26298.1	A0A498MWL3	23.0457	0
RXN26370.1	A0A498MZW2	21.1999	0
RXN26652.1	A0A498N4B0	22.2623	0
RXN26748.1	A0A498MXT9	28.1682	0
RXN26779.1	A0A498MXN1	26.8676	0
RXN26822.1	A0A498N4T9	24.6624	0
RXN26842.1	A0A498N4V5	0	24.6726
RXN27046.1	A0A498N8W5	0	25.8458
RXN27087.1	A0A498ND19	0	23.8056
RXN27096.1	A0A498N900	0	24.1745
RXN27115.1	A0A498NCE7	20.5345	0
RXN27225.1	A0A498LIG4	0	26.061
RXN27226.1	A0A498LIG2	0	21.0552
RXN27273.1	A0A498LM70	0	21.3161
RXN27334.1	A0A498N6M0	22.6477	0
RXN27336.1	A0A498N9I0	22.7247	0
RXN27347.1	A0A498NDE8	0	22.3727
RXN27383.1	A0A498N5A3	21.1862	0
RXN27595.1	A0A498LFX2	25.2236	0
RXN27705.1	A0A498NDB7	0	24.383
RXN27794.1	A0A498N7X6	24.5771	0
RXN28056.1	A0A498NB41	21.4986	0
RXN28108.1	A0A498N1L7	0	24.6348
RXN28114.1	A0A498N8T3	22.8861	0
RXN28368.1	A0A498N2H2	0	29.2732
RXN28477.1	A0A498NEH5	30.7036	0
RXN28547.1	A0A498LID7	22.3114	0
RXN28674.1	A0A498NAA2	24.8076	0
RXN28793.1	A0A498N967	0	26.1222
RXN28894.1	A0A498NAV9	32.2577	0
RXN29067.1	A0A498NEX3	0	25.8082
RXN29164.1	A0A498NBG9	0	22.4552
RXN29206.1	A0A498NDA5	25.3554	0
RXN29256.1	A0A498NDD2	0	25.7961
RXN29271.1	A0A498N8N4	0	25.3575
RXN29522.1	A0A498NBW6	21.8406	0
RXN29655.1	A0A498NF34	0	22.7309
RXN29776.1	A0A498NE09	25.8451	0
RXN29787.1	A0A498NFB0	22.8873	0
RXN29850.1	A0A498N9X5	0	26.1635
RXN29949.1	A0A498N692	29.7239	0
RXN30321.1	A0A498NB20	23.8395	0
RXN30358.1	A0A498N852	0	26.591
RXN30372.1	A0A498NDA7	0	26.0066
RXN30392.1	A0A498NDB9	0	23.9723
RXN30582.1	A0A498NDL3	29.0254	0
RXN30964.1	A0A498L4W7	0	22.4484
RXN31396.1	A0A498NHS6	25.0031	0
RXN31753.1	A0A498NIT1	0	24.6631
RXN31923.1	A0A498NJ85	0	24.622
RXN32165.1	A0A498N6F9	30.1128	0
RXN32301.1	A0A498NKB9	0	23.5113
RXN32303.1	A0A498NK93	24.0795	0
RXN32304.1	A0A498NKS3	23.2711	0
RXN32484.1	A0A498NL95	0	24.9863
RXN32778.1	A0A498NM02	0	25.9427
RXN32833.1	A0A498NLP0	22.2243	0
RXN32896.1	A0A498NM96	0	19.6062
RXN33506.1	A0A498NNZ8	0	26.1339
RXN33514.1	A0A498NPF5	25.5665	0
RXN33518.1	A0A498NP15	0	22.4033
RXN33602.1	A0A498NNL7	21.4932	0
RXN33859.1	A0A498NQ81	30.2238	0
RXN34201.1	A0A498NQU3	23.2697	0
RXN34273.1	A0A498NQT6	0	23.7706
RXN34308.1	A0A498NRC1	0	25.1042
RXN34338.1	A0A498NRF0	0	25.3048
RXN34348.1	A0A498NRG2	0	24.6589
RXN34450.1	A0A498NQW1	0	25.0706
RXN34456.1	A0A498NRP9	0	25.1614
RXN34576.1	A0A498NS33	22.8113	0
RXN34660.1	A0A498NRH5	0	23.3497
RXN34819.1	A0A498NT95	0	21.8047
RXN35172.1	A0A498NSR6	0	27.7374
RXN35193.1	A0A498NTA6	0	28.7284
RXN35327.1	A0A498NV23	29.2453	0
RXN35433.1	A0A498NTZ9	0	23.6005
RXN35462.1	A0A498NTK2	0	27.9214
RXN36195.1	A0A498N1D9	0	24.7271
RXN36403.1	A0A498NWS5	0	26.7653
RXN37737.1	A0A498P2S5	24.3128	0
RXN37934.1	A0A498MMW8	0	24.9173
RXN38446.1	A0A498P3E9	0	25.586
RXN39586.1	A0A498P6Q2	0	26.3789
RXN39638.1	A0A498P6G9	26.0426	0
RXN02360.1	A0A498L1P6	0	23.688
RXN02720.1	A0A498L2R3	26.9682	0
RXN02793.1	A0A498L5V1	22.386	0
RXN02906.1	A0A498L7U9	22.0432	0
RXN02993.1	A0A498L6D5	0	30.9393
RXN02999.1	A0A498L447	0	24.6485
RXN03001.1	A0A498L3L2	0	31.8149
RXN03002.1	A0A498L3L0	0	27.9781
RXN03175.1	A0A498MQ09	0	24.0681
RXN03227.1	A0A498LBP1	23.9136	0
RXN03652.1	A0A498L5L6	0	23.8793
RXN03817.1	A0A498LDI3	0	30.301
RXN03824.1	A0A498LBE8	0	22.787
RXN04104.1	A0A498LC72	23.1027	0
RXN04209.1	A0A498P542	22.7773	0
RXN04282.1	A0A498L7R7	0	30.6179
RXN04299.1	A0A498L7Q6	30.6791	30.3525
RXN05280.1	A0A498LAE0	23.6319	24.2391
RXN05367.1	A0A498LI31	0	26.5095
RXN05641.1	A0A498LBC2	0	24.2213
RXN05676.1	A0A498LFD3	22.4242	0
RXN05678.1	A0A498LBW2	0	25.5294
RXN05730.1	A0A498LBT2	27.5886	29.9005
RXN05793.1	A0A498MK11	0	27.7839
RXN05867.1	A0A498LJS0	24.7881	30.6606
RXN05966.1	A0A498LG34	21.8257	29.1205
RXN06006.1	A0A498LG68	0	23.8925
RXN06080.1	A0A498MNQ9	21.3481	27.4499
RXN06152.1	A0A498LDA6	22.7615	21.6362
RXN06230.1	A0A498LZI4	0	28.3156
RXN06605.1	A0A498M4T8	21.7591	25.5993
RXN06677.1	A0A498LM58	0	22.3876
RXN06842.1	A0A498N625	25.4578	0
RXN06963.1	A0A498LHF5	24.4925	0
RXN07011.1	A0A498LFT2	27.9856	32.8906
RXN07133.1	A0A498LHW2	0	21.7031
RXN07146.1	A0A498LJB0	24.5368	0
RXN07315.1	A0A498LPM6	26.6759	27.2521
RXN07414.1	A0A498LL34	0	24.5011
RXN07535.1	A0A498LQ86	21.2182	0
RXN07646.1	A0A498LKV6	0	22.1842
RXN07672.1	A0A498LIM4	0	20.7368
RXN07872.1	A0A498LJ59	21.154	26.9497
RXN08123.1	A0A498N2G5	23.2096	27.4324
RXN08480.1	A0A498LJR7	22.9713	22.2447
RXN08907.1	A0A498LU12	23.8967	0
RXN08944.1	A0A498LQF9	21.0478	26.2094
RXN08971.1	A0A498LLS1	20.538	25.161
RXN09044.1	A0A498LQQ5	27.1224	0
RXN09056.1	A0A498LPN1	22.8564	0
RXN09080.1	A0A498LLG6	0	24.2586
RXN09143.1	A0A498LNG6	0	23.2827
RXN09160.1	A0A498NZY2	26.0102	30.0893
RXN09353.1	A0A498LP02	0	18.3938
RXN09419.1	A0A498LLY0	0	22.9725
RXN09600.1	A0A498LN88	24.9453	28.6884
RXN09652.1	A0A498LPF1	0	23.581
RXN09738.1	A0A498LMT6	22.2767	0
RXN09756.1	A0A498LRP6	0	26.6948
RXN10340.1	A0A498LQ91	0	22.024
RXN10636.1	A0A498LU40	23.4691	0
RXN10649.1	A0A498LQH0	22.7667	25.0829
RXN10655.1	A0A498LZ34	25.879	27.1638
RXN10688.1	A0A498LQI5	25.387	28.1459
RXN10892.1	A0A498LT79	22.9399	0
RXN11025.1	A0A498M044	23.0219	21.1987
RXN11068.1	A0A498LRJ3	0	25.6449
RXN11075.1	A0A498M0F5	24.1707	21.5921
RXN11239.1	A0A498LS47	23.0958	26.3853
RXN11323.1	A0A498LUN0	0	25.6842
RXN11408.1	A0A498LSH3	22.7544	0
RXN11542.1	A0A498LV59	26.3937	0
RXN11831.1	A0A498LUH2	30.1635	34.3019
RXN12821.1	A0A498LX53	26.2546	25.3687
RXN12841.1	A0A498LX75	22.6215	23.1201
RXN13269.1	A0A498M5E4	24.5227	26.3664
RXN13314.1	A0A498M2G5	25.0532	22.7277
RXN13513.1	A0A498M116	0	20.3703
RXN13930.1	A0A498M070	23.7563	23.2757
RXN14046.1	A0A498M3J5	26.8875	0
RXN14534.1	A0A498M5S1	29.2001	34.8866
RXN15248.1	A0A498M321	25.8526	0
RXN15426.1	A0A498M7J5	23.4927	0
RXN15841.1	A0A498M5J5	25.8497	0
RXN15860.1	A0A498M5Q9	23.0408	25.1351
RXN15861.1	A0A498M5L2	23.3542	25.6028
RXN16117.1	A0A498MGJ7	0	27.8303
RXN16195.1	A0A498MFD2	21.1978	0
RXN16389.1	A0A498M657	0	22.7341
RXN16434.1	A0A498MB00	0	29.0554
RXN16614.1	A0A498MBG2	27.6298	0
RXN16639.1	A0A498M6W2	0	24.3856
RXN16713.1	A0A498MA91	0	20.4384
RXN16851.1	A0A498LI49	28.0213	32.4423
RXN17038.1	A0A498M7W9	0	25.9115
RXN17059.1	A0A498M7Y7	0	25.273
RXN17308.1	A0A498M8L1	0	26.3376
RXN17348.1	A0A498M8N7	23.8365	0
RXN17402.1	A0A498MDE1	22.1201	25.7469
RXN17577.1	A0A498MKR8	24.0721	24.8222
RXN17716.1	A0A498MFG7	0	24.882
RXN17761.1	A0A498MAC3	0	25.4187
RXN17764.1	A0A498MEL6	0	21.4264
RXN17839.1	A0A498M9W0	27.4396	25.8555
RXN17851.1	A0A498MAI7	0	23.2077
RXN18006.1	A0A498MGE7	0	25.5387
RXN18042.1	A0A498MF99	0	23.5063
RXN18060.1	A0A498MCU7	0	26.7337
RXN18103.1	A0A498ME95	0	25.1951
RXN18104.1	A0A498MFG2	0	29.3479
RXN18105.1	A0A498MLK4	0	26.2405
RXN18106.1	A0A498MGP2	0	29.4288
RXN18111.1	A0A498MB48	0	31.8243
RXN18173.1	A0A498MEG3	0	27.1938
RXN18248.1	A0A498MAX6	24.2593	24.0694
RXN18272.1	A0A498MFY1	0	23.5304
RXN18410.1	A0A498ME31	0	22.3046
RXN18441.1	A0A498MBX9	22.4723	25.8116
RXN18757.1	A0A498MP20	0	27.7344
RXN18948.1	A0A498MCS1	20.1188	0
RXN19099.1	A0A498MD78	0	23.9379
RXN19811.1	A0A498MSV7	0	26.6472
RXN19837.1	A0A498MSB9	0	22.1096
RXN19969.1	A0A498MFH6	30.1962	24.8147
RXN19978.1	A0A498MFG1	0	24.7592
RXN20040.1	A0A498MIR4	0	30.7484
RXN20172.1	A0A498MKZ9	22.7647	27.0149
RXN20198.1	A0A498MG29	22.2438	27.6748
RXN20200.1	A0A498MJ42	0	20.2554
RXN20210.1	A0A498MJ49	0	24.7484
RXN20256.1	A0A498MNK5	0	23.4206
RXN20258.1	A0A498MG83	0	23.8886
RXN20434.1	A0A498MM38	0	23.5527
RXN20810.1	A0A498NZF6	21.9043	0
RXN20929.1	A0A498MI06	22.9314	0
RXN21071.1	A0A498MJ08	23.8018	28.7849
RXN21435.1	A0A498MXQ9	23.7584	26.6328
RXN21452.1	A0A498MPA1	0	20.7519
RXN21465.1	A0A498MXU0	23.4674	24.5276
RXN21562.1	A0A498MPK1	23.0476	29.841
RXN21617.1	A0A498MYF3	21.7056	20.7704
RXN21673.1	A0A498MPE7	22.902	23.5327
RXN22087.1	A0A498N5C0	24.1391	21.8711
RXN22532.1	A0A498MSI3	21.7899	25.1746
RXN22670.1	A0A498MQM3	25.9865	0
RXN22682.1	A0A498MSW9	21.8604	26.3147
RXN23391.1	A0A498MRI5	23.9901	0
RXN23402.1	A0A498MYZ9	25.7477	26.5428
RXN24146.1	A0A498N0S9	21.9812	0
RXN24251.1	A0A498MUL3	22.9811	0
RXN24268.1	A0A498MRM7	27.7405	30.1732
RXN24303.1	A0A498MWU4	23.4084	0
RXN24396.1	A0A498N1H1	24.7591	20.9883
RXN24440.1	A0A498MUQ2	24.9171	0
RXN24489.1	A0A498MS66	23.0991	0
RXN24671.1	A0A498MW63	27.1581	0
RXN24686.1	A0A498N2F1	26.3977	0
RXN24787.1	A0A498N847	0	24.9599
RXN24799.1	A0A498MSW6	22.0799	24.152
RXN25199.1	A0A498MTQ2	0	22.5812
RXN25274.1	A0A498N0I5	25.2888	0
RXN25318.1	A0A498MU82	33.5918	28.8787
RXN25334.1	A0A498N0P8	0	20.0806
RXN25502.1	A0A498N149	22.1822	0
RXN25676.1	A0A498N572	24.6706	0
RXN25805.1	A0A498N9Q3	0	26.8831
RXN25806.1	A0A498N5I5	23.968	21.8471
RXN26008.1	A0A498MVW3	0	24.7053
RXN26040.1	A0A498MYZ3	22.4753	22.2284
RXN26512.1	A0A498N3W5	0	24.9261
RXN26568.1	A0A498MXB6	22.5111	21.5845
RXN26610.1	A0A498MUC5	24.0384	24.9679
RXN26699.1	A0A498MXF2	21.5621	22.7158
RXN26894.1	A0A498N5D6	20.739	22.8733
RXN27000.1	A0A498N1R8	22.5648	24.7508
RXN27042.1	A0A498N5G7	25.0172	26.2131
RXN27196.1	A0A498N981	0	25.1377
RXN27229.1	A0A498LJY8	23.7119	0
RXN27294.1	A0A498N6I2	0	28.6615
RXN27331.1	A0A498N3J3	24.6689	24.383
RXN27567.1	A0A498NDQ5	0	23.5143
RXN27702.1	A0A498N7P1	27.4017	23.4448
RXN28112.1	A0A498N8Q8	0	22.7192
RXN28258.1	A0A498N271	0	24.9026
RXN28326.1	A0A498NBS6	0	24.4829
RXN28432.1	A0A498M4A4	0	21.0063
RXN28576.1	A0A498NC79	25.0752	22.5983
RXN28636.1	A0A498NCB9	24.0755	0
RXN28717.1	A0A498NEP4	21.891	0
RXN28794.1	A0A498NAL4	0	24.9692
RXN28797.1	A0A498NER6	22.5742	23.752
RXN28858.1	A0A498N421	0	23.8528
RXN29001.1	A0A498N804	24.1076	23.6305
RXN29007.1	A0A498NEW2	25.6033	31.3059
RXN29015.1	A0A498NEM6	23.9074	0
RXN29034.1	A0A498NB66	0	31.9673
RXN29063.1	A0A498N9R2	0	21.9795
RXN29070.1	A0A498N7T5	31.5793	30.5942
RXN29144.1	A0A498NBF1	22.3649	25.2486
RXN29160.1	A0A498N889	0	24.4745
RXN29518.1	A0A498N5W5	21.9084	24.8615
RXN29534.1	A0A498NC81	22.7888	0
RXN29580.1	A0A498N991	22.021	0
RXN29656.1	A0A498NDX1	24.8575	29.1123
RXN29874.1	A0A498NCT6	0	25.8624
RXN29880.1	A0A498N9Z4	26.1234	31.0768
RXN30376.1	A0A498NEJ9	0	24.484
RXN30576.1	A0A498NER5	24.9606	0
RXN30726.1	A0A498NFX0	21.6365	27.3429
RXN30750.1	A0A498NFY8	22.8399	0
RXN30821.1	A0A498P0A0	24.6786	0
RXN31015.1	A0A498NGP9	23.1938	23.4031
RXN31291.1	A0A498NHJ6	21.4499	24.3605
RXN31374.1	A0A498NHZ9	23.0059	0
RXN31402.1	A0A498NHR6	0	25.3495
RXN31471.1	A0A498NI19	25.998	0
RXN31779.1	A0A498NMS2	20.9434	23.4831
RXN31895.1	A0A498NJ86	21.5458	28.4205
RXN31905.1	A0A498NJ95	25.468	26.3769
RXN31945.1	A0A498NJD8	0	25.2829
RXN31984.1	A0A498NJV8	24.832	20.9267
RXN32052.1	A0A498NJF0	21.4175	26.4711
RXN32063.1	A0A498NJL8	25.4415	0
RXN32233.1	A0A498NK36	23.936	29.3295
RXN32234.1	A0A498NKK1	24.4988	25.0124
RXN32240.1	A0A498NJY6	0	24.698
RXN32277.1	A0A498NL15	23.8691	24.9025
RXN32318.1	A0A498NKH6	22.7219	27.5139
RXN32490.1	A0A498NKL2	25.978	0
RXN32546.1	A0A498NL97	0	29.4738
RXN32685.1	A0A498NLE5	0	22.557
RXN32743.1	A0A498NLG4	21.7719	22.2549
RXN33359.1	A0A498NNM6	0	27.3642
RXN33391.1	A0A498NNJ4	23.6646	30.0532
RXN33447.1	A0A498NPH4	27.8236	0
RXN33719.1	A0A498MZZ3	26.4333	0
RXN33761.1	A0A498NPL4	22.5213	22.334
RXN33774.1	A0A498NQD2	22.7533	22.2631
RXN33820.1	A0A498NP48	0	24.462
RXN34216.1	A0A498NR10	22.6181	22.006
RXN34263.1	A0A498NQS5	0	21.5907
RXN34281.1	A0A498NR18	0	20.4181
RXN34294.1	A0A498NRX6	22.7137	0
RXN34329.1	A0A498NRL8	24.1767	29.8298
RXN34380.1	A0A498NQP6	0	24.1421
RXN34714.1	A0A498NT58	34.579	22.0533
RXN34801.1	A0A498NSH1	23.765	0
RXN34857.1	A0A498NTP0	23.0053	22.3148
RXN35017.1	A0A498NU49	23.8158	28.115
RXN35150.1	A0A498NSQ4	0	21.4798
RXN35283.1	A0A498NTJ9	23.1411	0
RXN35284.1	A0A498NUR6	0	25.4131
RXN35352.1	A0A498NT93	0	24.0936
RXN35355.1	A0A498NTJ8	0	24.4317
RXN35551.1	A0A498NUH2	29.1429	29.4753
RXN35758.1	A0A498NVJ7	21.7963	0
RXN35782.1	A0A498NUG2	33.1982	0
RXN36034.1	A0A498NX04	21.8023	26.8334
RXN36410.1	A0A498NW55	0	23.6991
RXN36923.1	A0A498NYE1	21.2455	0
RXN37123.1	A0A498MYU8	23.4245	26.3313
RXN37488.1	A0A498P0B7	22.8054	24.6301
RXN38076.1	A0A498MVL2	20.5939	0
RXN38822.1	A0A498P2G6	0	26.8024
RXN38951.1	A0A498P422	0	23.3246
RXN39200.1	A0A498P3G3	24.0521	23.3044
RXN02424.1	A0A498L7K2	21.9099	26.2971
RXN02638.1	A0A498LQD7	20.726	28.9782
RXN02733.1	A0A498MUU4	0	23.5278
RXN02802.1	A0A498L309	0	24.6925
RXN03003.1	A0A498L6E5	0	29.4771
RXN03789.1	A0A498L6B4	30.386	35.0933
RXN03809.1	A0A498L6D0	0	24.2258
RXN04395.1	A0A498LG55	0	24.6848
RXN04540.1	A0A498L885	21.9492	25.9509
RXN06234.1	A0A498LHU4	0	26.7692
RXN06848.1	A0A498MYT1	23.4767	23.2492
RXN06875.1	A0A498LND3	0	28.4925
RXN06988.1	A0A498LGH2	0	23.5779
RXN07072.1	A0A498NG15	22.9191	22.1719
RXN07147.1	A0A498LNL0	26.0413	0
RXN07188.1	A0A498LFV9	21.8555	25.6935
RXN07256.1	A0A498LJL9	0	23.7832
RXN07393.1	A0A498LIK7	20.7093	0
RXN07618.1	A0A498LH19	20.8806	23.1528
RXN07628.1	A0A498LH28	23.1019	28.2397
RXN08051.1	A0A498L5Z4	0	22.6373
RXN08348.1	A0A498LJ37	0	24.3311
RXN08465.1	A0A498LSX0	33.7798	26.4506
RXN08466.1	A0A498LN29	32.8381	22.9846
RXN08574.1	A0A498LP79	23.7835	0
RXN08784.1	A0A498LQ08	0	25.0171
RXN08805.1	A0A498LTV8	22.8328	0
RXN08860.1	A0A498LKW4	0	21.4701
RXN08879.1	A0A498LKG2	0	28.8222
RXN08898.1	A0A498LKG5	0	23.3443
RXN08988.1	A0A498LKP6	0	29.9564
RXN09041.1	A0A498LLY9	24.832	0
RXN09045.1	A0A498LUR4	23.4893	29.5763
RXN09078.1	A0A498LKZ2	0	27.7684
RXN09109.1	A0A498LL35	24.8017	0
RXN09135.1	A0A498LV02	23.0664	0
RXN09444.1	A0A498LRS5	23.0261	0
RXN09450.1	A0A498LMS0	0	23.0241
RXN09453.1	A0A498LP98	27.1362	27.2695
RXN09457.1	A0A498LVW9	0	25.2745
RXN09704.1	A0A498LSJ7	27.1724	32.2604
RXN09780.1	A0A498LNP9	23.9445	0
RXN10030.1	A0A498LPD4	25.8382	30.9817
RXN10296.1	A0A498LT47	0	27.3376
RXN10441.1	A0A498LQR8	27.7443	21.7395
RXN11014.1	A0A498LVY2	0	20.7276
RXN12124.1	A0A498LZ12	0	19.5079
RXN12152.1	A0A498NNR1	0	24.7884
RXN12605.1	A0A498MKV7	0	25.8804
RXN12856.1	A0A498M061	25.2023	0
RXN13445.1	A0A498M722	0	22.4578
RXN13535.1	A0A498M7B3	24.8413	22.6055
RXN13861.1	A0A498M013	27.1362	0
RXN14076.1	A0A498M3M7	0	25.6977
RXN14302.1	A0A498N2N7	0	28.7742
RXN14351.1	A0A498M1C4	0	32.5418
RXN14927.1	A0A498MCX4	0	26.7446
RXN15431.1	A0A498M4F3	21.7401	21.9047
RXN15486.1	A0A498M7Q2	0	26.4212
RXN15666.1	A0A498M894	0	24.4005
RXN15824.1	A0A498P559	24.9642	0
RXN15865.1	A0A498MEF2	0	25.6869
RXN16185.1	A0A498MFB9	24.2065	23.8133
RXN16281.1	A0A498M6M7	32.1312	37.3776
RXN16731.1	A0A498M7U6	23.2479	24.077
RXN16812.1	A0A498MBJ8	35.9203	28.58
RXN16848.1	A0A498LDK9	24.8732	0
RXN16976.1	A0A498MCZ8	31.3451	0
RXN17671.1	A0A498MA59	26.7049	0
RXN17674.1	A0A498LRG0	22.3605	0
RXN17717.1	A0A498ML75	0	21.3268
RXN17885.1	A0A498MKV1	26.3931	0
RXN18107.1	A0A498MM76	0	30.2745
RXN18274.1	A0A498MFX3	0	28.0375
RXN18294.1	A0A498MFZ2	20.9785	0
RXN18544.1	A0A498MGN9	25.6936	27.9119
RXN18894.1	A0A498MHR7	22.7728	0
RXN18992.1	A0A498MHV8	0	24.0762
RXN19075.1	A0A498MPS8	23.0778	26.6083
RXN19485.1	A0A498MR07	0	23.3933
RXN19621.1	A0A498MEZ4	0	30.6644
RXN19711.1	A0A498MF96	0	25.7921
RXN19923.1	A0A498MJF6	31.7673	28.5116
RXN19934.1	A0A498MKR7	0	25.1356
RXN20233.1	A0A498LES4	0	26.2265
RXN20371.1	A0A498MGY9	21.9554	23.8477
RXN20653.1	A0A498MLI5	0	29.4831
RXN20956.1	A0A498MQW6	21.5122	24.2666
RXN20966.1	A0A498MQX8	27.2463	28.1073
RXN21167.1	A0A498MWT1	33.6387	37.762
RXN21182.1	A0A498MNJ6	24.0604	23.891
RXN21205.1	A0A498MX24	21.4948	24.4663
RXN21476.1	A0A498MSR0	32.6044	26.7769
RXN21569.1	A0A498MJT4	0	25.7988
RXN21644.1	A0A498LJH4	24.4702	22.4269
RXN21667.1	A0A498MYT5	25.9073	26.9501
RXN21954.1	A0A498MRJ0	0	24.9452
RXN22223.1	A0A498MQW9	0	22.8823
RXN22301.1	A0A498LMT8	0	34.0779
RXN22539.1	A0A498MM78	23.0768	0
RXN22589.1	A0A498MMB3	0	20.6728
RXN22600.1	A0A498MQF4	24.3329	28.3942
RXN22683.1	A0A498MS40	0	25.1836
RXN23456.1	A0A498LAC3	0	24.5643
RXN23744.1	A0A498MW86	25.4317	0
RXN24289.1	A0A498MRN1	24.6961	27.8848
RXN24560.1	A0A498MV07	0	20.4673
RXN24759.1	A0A498MSR7	0	24.0869
RXN25332.1	A0A498N0M1	24.6026	27.3908
RXN25503.1	A0A498LDW3	25.0941	25.7348
RXN25969.1	A0A498MVB9	0	28.5667
RXN26202.1	A0A498N304	0	23.8533
RXN26245.1	A0A498NAP9	22.5963	0
RXN26694.1	A0A498N4V0	24.1811	26.4919
RXN26979.1	A0A498MY69	0	27.2517
RXN27083.1	A0A498N4F1	25.6146	0
RXN27139.1	A0A498LMQ4	22.2094	0
RXN27190.1	A0A498N2C4	24.1448	26.7063
RXN27194.1	A0A498N670	24.7764	20.6504
RXN27456.1	A0A498N9S3	22.5722	0
RXN27929.1	A0A498N0X0	23.5544	27.8148
RXN28239.1	A0A498N1R9	21.9307	0
RXN28370.1	A0A498N5P4	24.6494	29.3237
RXN28433.1	A0A498N898	21.857	24.9743
RXN28461.1	A0A498N6K7	23.0028	25.0884
RXN28484.1	A0A498N9U1	0	27.5905
RXN28820.1	A0A498N6X4	30.672	35.1506
RXN28866.1	A0A498NCS2	25.7479	31.8279
RXN29143.1	A0A498N9W8	23.8336	24.5544
RXN29246.1	A0A498NDC8	24.7326	0
RXN29382.1	A0A498NBP1	0	24.8528
RXN29778.1	A0A498N6L6	24.5528	0
RXN29789.1	A0A498N5V9	22.3791	24.2468
RXN29828.1	A0A498N6R0	27.1667	0
RXN29873.1	A0A498NBJ2	0	23.7057
RXN30307.1	A0A498NFK4	26.2468	0
RXN30320.1	A0A498NB00	24.002	0
RXN30374.1	A0A498NDJ2	0	22.9142
RXN30393.1	A0A498NCF8	22.8944	24.6819
RXN30428.1	A0A498N8C1	22.2533	24.9399
RXN30490.1	A0A498NBF4	27.1705	0
RXN30502.1	A0A498NDH4	0	30.5043
RXN30524.1	A0A498NDR4	28.6725	28.0916
RXN30647.1	A0A498NFQ9	0	24.2448
RXN31424.1	A0A498NI48	0	19.7885
RXN31601.1	A0A498NID7	24.8883	0
RXN31646.1	A0A498LGP6	29.2129	21.7958
RXN31754.1	A0A498NJ80	25.3293	29.0533
RXN31837.1	A0A498NJK9	24.076	0
RXN31970.1	A0A498NJ56	0	24.1359
RXN31973.1	A0A498NJD5	21.2622	25.9367
RXN32288.1	A0A498NKE7	0	23.9115
RXN32532.1	A0A498NKS2	0	24.1651
RXN32720.1	A0A498NL83	22.7806	29.9897
RXN33371.1	A0A498NNH4	26.3083	0
RXN33380.1	A0A498NMY4	0	21.3346
RXN33473.1	A0A498NNJ3	0	20.7839
RXN33531.1	A0A498NNY5	0	24.7656
RXN33695.1	A0A498NP39	21.5628	20.2869
RXN33773.1	A0A498LJ32	21.1775	23.2112
RXN33806.1	A0A498NPV2	0	19.4859
RXN34050.1	A0A498NPQ7	34.6464	27.8099
RXN34230.1	A0A498NQ95	0	26.0195
RXN34665.1	A0A498NRT4	33.5116	38.0033
RXN34715.1	A0A498NRX9	24.1105	22.4077
RXN34790.1	A0A498NRT8	0	25.4785
RXN34800.1	A0A498NRU8	21.2027	0
RXN35209.1	A0A498NUD0	20.7815	0
RXN35293.1	A0A498NTK6	0	24.8275
RXN35488.1	A0A498NUT5	0	25.0814
RXN35808.1	A0A498NVP3	24.8861	29.4201
RXN37697.1	A0A498P2N4	0	24.6464
RXN38412.1	A0A498P1C8	0	26.6278
RXN38475.1	A0A498N9H2	23.9321	0
RXN38803.1	A0A498P3M8	0	17.3356
RXN39219.1	A0A498P6B7	21.9408	0
RXN03138.1	A0A498L4V5	23.5137	27.8921
RXN03418.1	A0A498L5N9	25.3092	0
RXN03489.1	A0A498L5I4	23.3358	0
RXN03681.1	A0A498L5N0	0	25.8079
RXN04013.1	A0A498L9H1	0	27.1891
RXN04545.1	A0A498LGK7	21.5206	0
RXN04840.1	A0A498L907	25.3196	29.0629
RXN05150.1	A0A498L9W6	0	22.8554
RXN05277.1	A0A498LHT3	0	25.7994
RXN05587.1	A0A498LIU8	25.6861	27.9926
RXN05963.1	A0A498LES5	23.6202	0
RXN06131.1	A0A498LCZ3	0	23.2509
RXN06148.1	A0A498LD23	25.0354	20.9735
RXN06229.1	A0A498M036	0	24.7742
RXN07641.1	A0A498LHT9	0	32.3283
RXN07655.1	A0A498LQL3	0	23.1384
RXN07678.1	A0A498LH92	0	27.7022
RXN08005.1	A0A498LRL9	0	22.6573
RXN08564.1	A0A498LP65	0	23.2808
RXN08796.1	A0A498LP04	20.3032	0
RXN08947.1	A0A498LU52	0	26.8878
RXN09283.1	A0A498LNT9	23.3126	23.3536
RXN09303.1	A0A498LNV6	26.4938	26.1426
RXN09403.1	A0A498LP47	21.5152	28.4533
RXN09406.1	A0A498LQL6	25.5521	28.0733
RXN09436.1	A0A498LQQ0	0	22.4134
RXN09589.1	A0A498LMI9	21.1067	22.9304
RXN10181.1	A0A498LQ15	0	25.3657
RXN10329.1	A0A498LPK2	25.8091	24.696
RXN10376.1	A0A498LTC8	23.1319	0
RXN10396.1	A0A498LTE7	0	23.6748
RXN10776.1	A0A498LUI3	20.3584	0
RXN11128.1	A0A498LRQ3	23.135	0
RXN11337.1	A0A498M1V8	0	22.6454
RXN11807.1	A0A498M3D1	23.0904	0
RXN12642.1	A0A498LZ42	25.1458	24.498
RXN12787.1	A0A498M6I3	0	23.8121
RXN12849.1	A0A498LWH6	0	25.6767
RXN12884.1	A0A498M1D0	25.2245	0
RXN12976.1	A0A498M0I6	23.9398	22.3223
RXN13249.1	A0A498LXI9	0	24.5063
RXN13636.1	A0A498LLU7	22.6738	20.563
RXN14111.1	A0A498MVA7	24.9212	25.5771
RXN14359.1	A0A498LRF8	23.8308	0
RXN14376.1	A0A498M4I9	24.5941	26.9221
RXN15176.1	A0A498MH08	22.2802	27.1303
RXN15358.1	A0A498M3C1	21.0647	24.3442
RXN15427.1	A0A498MEI7	23.0729	22.3666
RXN15438.1	A0A498M3K3	27.2688	0
RXN15637.1	A0A498MF43	0	26.5806
RXN15800.1	A0A498M5K6	22.5636	28.1178
RXN16288.1	A0A498M5W8	24.2567	26.4247
RXN16422.1	A0A498MAI2	24.9147	26.0914
RXN16429.1	A0A498M698	0	22.0038
RXN16448.1	A0A498M6B2	22.9559	26.7968
RXN16642.1	A0A498MB56	27.0464	0
RXN16724.1	A0A498MBR8	0	23.4468
RXN16736.1	A0A498MC88	26.7405	26.3854
RXN16898.1	A0A498NGY9	24.6154	0
RXN17417.1	A0A498MKC0	23.2404	0
RXN17522.1	A0A498MDS8	0	21.8039
RXN17645.1	A0A498MK14	0	22.7862
RXN17736.1	A0A498MFI8	0	26.4913
RXN17824.1	A0A498MER8	0	24.9177
RXN17945.1	A0A498ML13	0	22.0077
RXN17998.1	A0A498MAA3	22.2264	26.237
RXN18108.1	A0A498MAJ5	0	31.823
RXN18110.1	A0A498MD02	0	31.5389
RXN18193.1	A0A498MEH9	0	26.0371
RXN18257.1	A0A498MML6	22.8957	24.8165
RXN18344.1	A0A498MG41	25.8217	23.3573
RXN18536.1	A0A498MI09	22.2498	0
RXN18994.1	A0A498MI25	23.3715	24.3539
RXN19059.1	A0A498MD45	0	26.2169
RXN20182.1	A0A498ML07	24.4267	26.6741
RXN20271.1	A0A498MGQ4	21.7932	19.5781
RXN20306.1	A0A498MNR7	0	28.9564
RXN20335.1	A0A498MUI7	0	26.0627
RXN20500.1	A0A498MJW6	0	24.9929
RXN20602.1	A0A498MM53	24.5796	0
RXN20638.1	A0A498MH76	22.5199	29.4326
RXN20688.1	A0A498MHC7	23.6121	0
RXN20737.1	A0A498MVB8	20.9681	22.8877
RXN21348.1	A0A498MJ25	0	23.9228
RXN21431.1	A0A498LCW0	0	23.2144
RXN21671.1	A0A498MKV5	21.4817	27.5987
RXN21720.1	A0A498MN61	28.8129	25.9507
RXN21734.1	A0A498MQY5	0	28.9002
RXN22352.1	A0A498MS09	21.5615	0
RXN22554.1	A0A498MT24	20.6742	26.9968
RXN22913.1	A0A498MSP6	22.6854	0
RXN23025.1	A0A498N2E8	0	21.8118
RXN23060.1	A0A498MRK5	23.4747	0
RXN23129.1	A0A498MNQ8	0	25.2439
RXN23309.1	A0A498MP79	22.1157	19.9847
RXN23365.1	A0A498MD60	24.9505	27.701
RXN23388.1	A0A498MPG3	24.725	29.7529
RXN24183.1	A0A498MWI2	26.2408	0
RXN24283.1	A0A498N1G4	0	24.8848
RXN24302.1	A0A498MXI8	23.6612	28.6319
RXN24444.1	A0A498MY47	0	32.4767
RXN24821.1	A0A498MWH7	0	26.7447
RXN25155.1	A0A498N890	0	25.1783
RXN25508.1	A0A498L8Y8	21.8002	24.6518
RXN25597.1	A0A498NA53	0	21.6027
RXN25944.1	A0A498N2J8	25.6705	0
RXN25966.1	A0A498N5Y0	0	24.8252
RXN26011.1	A0A498MZR4	22.7703	0
RXN26394.1	A0A498N3V2	0	26.2545
RXN26425.1	A0A498NB24	25.0815	28.5779
RXN26571.1	A0A498N1D0	21.9376	0
RXN26760.1	A0A498N127	25.1987	0
RXN26851.1	A0A498N235	0	32.8518
RXN26852.1	A0A498N4W3	0	34.071
RXN26872.1	A0A498N4Y4	0	28.3496
RXN26889.1	A0A498MXY2	23.7082	0
RXN27058.1	A0A498MYK7	26.5497	23.4318
RXN27262.1	A0A498N6D1	23.8375	26.7189
RXN27601.1	A0A498N494	23.5362	0
RXN27739.1	A0A498M148	24.9304	27.0014
RXN28064.1	A0A498N8N6	0	27.2844
RXN28204.1	A0A498N962	0	24.447
RXN28567.1	A0A498NEK3	21.8207	0
RXN28946.1	A0A498NCW8	23.2695	0
RXN29037.1	A0A498NEW7	23.9105	0
RXN29105.1	A0A498NEQ6	23.9765	21.0887
RXN29149.1	A0A498N439	23.9301	25.0152
RXN29581.1	A0A498N9D3	0	24.2865
RXN30125.1	A0A498NFE0	24.3143	26.761
RXN30493.1	A0A498NCL7	25.6958	0
RXN30607.1	A0A498NFQ5	0	26.008
RXN31265.1	A0A498NHE1	23.4279	0
RXN31371.1	A0A498NHS7	22.9332	0
RXN31415.1	A0A498NHU0	0	24.7728
RXN33057.1	A0A498NNF5	20.6092	0
RXN33095.1	A0A498NIK4	0	23.6601
RXN33312.1	A0A498NMV3	21.567	0
RXN33476.1	A0A498NNW8	23.927	23.9922
RXN33539.1	A0A498NP91	0	23.5203
RXN33651.1	A0A498NPB5	24.3065	0
RXN33654.1	A0A498NQ16	23.5139	0
RXN34225.1	A0A498MQ41	21.2989	0
RXN34775.1	A0A498NS36	0	19.4963
RXN34808.1	A0A498NSQ2	24.4131	22.7249
RXN34902.1	A0A498NS30	22.9449	0
RXN34964.1	A0A498NTU5	37.8844	25.3208
RXN35016.1	A0A498NTM4	36.7427	29.2702
RXN35175.1	A0A498NT34	22.7929	0
RXN35585.1	A0A498NUC4	23.1985	21.1761
RXN35678.1	A0A498NVC4	0	25.573
RXN36587.1	A0A498NZ12	23.6353	23.7803
RXN38031.1	A0A498P1G7	0	26.6947
RXN38287.1	A0A498NU75	29.5551	28.4909
RXN38734.1	A0A498P5C7	0	23.0253
RXN39634.1	A0A498P826	21.7709	26.2622
RXN02842.1	A0A498L347	21.6653	0
RXN02933.1	A0A498L684	0	25.0565
RXN03056.1	A0A498L892	27.2994	30.9887
RXN03089.1	A0A498L4D0	23.5075	25.481
RXN03787.1	A0A498LDF0	0	25.275
RXN04399.1	A0A498L7Z4	0	25.1985
RXN04655.1	A0A498LGX1	0	23.3261
RXN05406.1	A0A498N837	0	24.7351
RXN05671.1	A0A498LBG1	22.2809	0
RXN05860.1	A0A498LC68	0	23.9354
RXN06116.1	A0A498LGH5	0	22.7652
RXN06266.1	A0A498LGW6	0	23.3195
RXN06409.1	A0A498LQQ7	25.192	26.9667
RXN06705.1	A0A498LMW8	24.5264	24.2952
RXN06878.1	A0A498LF16	20.7585	23.9729
RXN07264.1	A0A498LKN7	21.2092	26.6013
RXN07283.1	A0A498LIA0	28.3142	29.709
RXN07533.1	A0A498LJ54	25.5438	27.0923
RXN07730.1	A0A498LHR8	21.9416	25.0558
RXN08842.1	A0A498LM02	0	22.3725
RXN08908.1	A0A498LKH3	22.6446	0
RXN09156.1	A0A498LPX7	0	22.8779
RXN09577.1	H9C4W5	23.8461	0
RXN09700.1	A0A498LNI8	27.438	31.4303
RXN09720.1	A0A498LNJ9	0	31.8434
RXN10305.1	A0A498LY31	0	24.9417
RXN10412.1	A0A498LRS8	26.4003	0
RXN10476.1	A0A498LTM7	0	23.3434
RXN10573.1	A0A498LSB8	0	30.3341
RXN10741.1	A0A498LRL5	26.2359	0
RXN11006.1	A0A498LV52	0	22.6405
RXN11031.1	A0A498LSD8	21.4312	0
RXN11325.1	A0A498M0Z0	0	24.3399
RXN11354.1	A0A498LWX6	0	21.9106
RXN11696.1	A0A498LWY6	0	26.7852
RXN11924.1	A0A498LYI2	0	21.3644
RXN12221.1	A0A498LVI3	24.5006	24.9444
RXN12342.1	A0A498LY40	0	25.0952
RXN12492.1	A0A498LYL1	0	24.5397
RXN12540.1	A0A498LWH4	23.428	28.9312
RXN12864.1	A0A498N4C5	22.3743	0
RXN14090.1	A0A498M0N2	23.4487	0
RXN14863.1	A0A498M4R5	0	32.532
RXN15261.1	A0A498M3Y7	22.3307	26.9562
RXN15597.1	A0A498MEZ9	0	28.3177
RXN15848.1	A0A498M4Q4	0	24.6225
RXN16356.1	A0A498MAW6	0	21.1075
RXN16435.1	A0A498MG49	0	25.3986
RXN16597.1	A0A498MHW2	20.5896	25.4181
RXN16628.1	A0A498M6V0	22.4931	24.3135
RXN17171.1	A0A498M8V5	31.366	35.3824
RXN17180.1	A0A498MA26	23.0431	25.5591
RXN17215.1	A0A498MIN0	25.6745	21.9255
RXN17542.1	A0A498MDU5	0	27.308
RXN17623.1	A0A498MCU0	23.6081	26.0488
RXN17724.1	A0A498MEI4	0	25.6799
RXN17756.1	A0A498MFK6	25.4888	23.7341
RXN18204.1	A0A498MFR0	0	25.6211
RXN18362.1	A0A498MG61	0	24.7476
RXN18363.1	A0A498MEX2	26.1385	0
RXN18406.1	A0A498MHN3	0	26.4972
RXN18531.1	A0A498MC65	0	21.9671
RXN18596.1	A0A498MI74	26.8413	0
RXN18727.1	A0A498MNZ0	25.4392	0
RXN18728.1	A0A498MC72	27.8698	0
RXN19036.1	A0A498MJL5	0	25.4318
RXN19068.1	A0A498MD26	21.3217	26.2575
RXN19604.1	A0A498L6M4	24.0216	24.0629
RXN19741.1	A0A498MFC2	0	30.1977
RXN19853.1	A0A498MJ92	0	23.813
RXN19927.1	A0A498MSR1	0	27.0051
RXN20267.1	A0A498MTN2	0	27.048
RXN20405.1	A0A498MUR5	0	24.106
RXN20561.1	A0A498MHF6	0	23.1711
RXN20584.1	A0A498MMJ9	0	23.4391
RXN20589.1	A0A498MH29	21.7932	24.3607
RXN20622.1	A0A498MM69	22.6591	26.6793
RXN20693.1	A0A498MLM8	0	22.5283
RXN20767.1	A0A498MVF0	0	26.0661
RXN20803.1	A0A498MLX4	0	24.0047
RXN21185.1	A0A498MX07	22.2205	0
RXN21242.1	A0A498MNP7	24.4002	24.8782
RXN21576.1	A0A498MT66	0	24.4584
RXN21607.1	A0A498MYE1	23.1492	0
RXN21732.1	A0A498MQ20	0	22.4314
RXN21929.1	A0A498MKR4	24.1894	0
RXN22210.1	A0A498MPF1	27.0992	25.2247
RXN22515.1	A0A498N0V5	0	25.7256
RXN22598.1	A0A498MME2	29.171	32.7334
RXN22617.1	A0A498N1F7	27.4442	29.6465
RXN23049.1	A0A498MNI0	0	25.361
RXN23396.1	A0A498MYQ5	0	25.0434
RXN23537.1	A0A498N466	0	24.2889
RXN23812.1	A0A498MW07	23.579	27.3774
RXN24737.1	A0A498N7Z4	0	24.9947
RXN24926.1	A0A498N338	0	27.3799
RXN25409.1	A0A498MU51	24.5416	30.6125
RXN25519.1	A0A498MUD3	0	26.7632
RXN25992.1	A0A498N2D1	23.7153	0
RXN26209.1	A0A498N3S0	24.7267	24.2085
RXN26282.1	A0A498N383	25.5392	0
RXN26320.1	A0A498MZQ8	25.8067	0
RXN26322.1	A0A498N3C5	27.5059	24.2741
RXN26330.1	A0A498MZS1	25.528	25.3182
RXN26517.1	A0A498NC42	24.2055	0
RXN26583.1	A0A498N335	0	23.8634
RXN26836.1	A0A498N8C7	20.503	24.4026
RXN27242.1	A0A498LMZ0	23.5504	0
RXN27309.1	A0A498MZ16	0	21.8655
RXN27461.1	A0A498N3W7	21.6373	22.5894
RXN27482.1	A0A498MUT0	23.0288	0
RXN27695.1	A0A498NDB2	0	22.7238
RXN27727.1	A0A498NDW3	22.2435	0
RXN27951.1	A0A498N584	0	21.3585
RXN28059.1	A0A498N195	0	22.9925
RXN28479.1	A0A498N2A3	0	25.0492
RXN28619.1	A0A498N2N3	0	26.9854
RXN28862.1	A0A498NAK3	0	28.2851
RXN28879.1	A0A498NT54	28.0149	26.2205
RXN29075.1	A0A498NEP6	0	26.0542
RXN29138.1	A0A498N4T4	0	27.4561
RXN29293.1	A0A498NA79	23.3236	23.9712
RXN29327.1	A0A498NF23	0	26.2811
RXN29357.1	A0A498LST9	23.1445	24.0888
RXN29468.1	A0A498N5R4	23.5474	24.965
RXN29483.1	A0A498NAN4	21.945	0
RXN29528.1	A0A498N5X4	22.7362	23.6441
RXN29721.1	A0A498N9Q1	0	26.2648
RXN29748.1	A0A498LRF7	22.3866	23.2603
RXN30373.1	A0A498NCE6	24.9745	0
RXN30747.1	A0A498NG84	0	25.6158
RXN31269.1	A0A498NHH1	0	24.4501
RXN31559.1	A0A498NIA6	21.5873	23.3269
RXN32025.1	A0A498NJL7	0	25.8375
RXN32291.1	A0A498NKB1	0	23.2542
RXN32396.1	A0A498NKU7	22.1344	0
RXN32599.1	A0A498NLD2	23.213	28.4052
RXN32773.1	A0A498NLI9	22.386	29.9891
RXN33154.1	A0A498L2F6	0	26.3462
RXN33308.1	A0A498NNF7	0	26.2008
RXN33370.1	A0A498NMX4	25.023	0
RXN33460.1	A0A498NN55	0	34.356
RXN34198.1	A0A498NR13	24.3658	0
RXN34495.1	A0A498NRA1	27.3014	27.0005
RXN34594.1	A0A498NSU0	0	27.6357
RXN34595.1	A0A498NRK1	24.1061	26.1705
RXN34733.1	A0A498L4B6	24.2457	27.0119
RXN34963.1	A0A498NSP8	36.3879	28.9977
RXN35234.1	A0A498NUL3	0	26.2282
RXN35285.1	A0A498NTD3	23.4698	23.4495
RXN35286.1	A0A498NUD1	22.5991	0
RXN35292.1	A0A498NT23	23.6612	27.3811
RXN35333.1	A0A498NTP8	24.7368	0
RXN35468.1	A0A498NUR8	0	24.9541
RXN35469.1	A0A498NV49	0	23.6723
RXN35470.1	A0A498NTL0	0	28.0759
RXN37487.1	RXN37487.1	0	25.4192
RXN38530.1	A0A498P1P5	0	34.2343
RXN38872.1	A0A498P2L1	22.3829	28.3858
RXN02319.1	A0A498L271	0	27.3142
RXN03319.1	A0A498L508	27.594	27.0452
RXN03366.1	A0A498L915	0	24.1278
RXN03413.1	A0A498L7M8	26.5573	0
RXN03828.1	A0A498L6U5	0	26.5569
RXN04131.1	A0A498L6X6	21.4009	0
RXN04144.1	A0A498LCA1	0	24.3375
RXN04382.1	A0A498L826	29.2838	0
RXN04800.1	A0A498L8W6	0	21.6502
RXN05026.1	A0A498LDK5	0	23.3145
RXN05447.1	A0A498LYP1	0	24.8828
RXN06873.1	A0A498LH72	0	23.2009
RXN07020.1	A0A498LFR4	27.7516	0
RXN07131.1	A0A498LG57	25.9046	0
RXN07275.1	A0A498LPJ7	22.1642	24.7899
RXN07404.1	A0A498LL25	0	19.6471
RXN07496.1	A0A498LKF3	24.7112	26.2471
RXN07747.1	A0A498LQJ1	24.3447	25.1352
RXN08402.1	A0A498LKN4	24.623	21.5316
RXN08432.1	A0A498LKR5	0	24.4184
RXN08883.1	A0A498LMR7	24.5638	0
RXN09054.1	A0A498LQR3	27.2385	26.589
RXN09191.1	A0A498LMB5	0	19.9237
RXN09586.1	V5XW03	27.2473	0
RXN10117.1	A0A498LY61	0	20.8141
RXN10364.1	A0A498LU94	0	25.6452
RXN10372.1	A0A498LRN4	24.6184	24.569
RXN10408.1	A0A498LPP8	0	22.2304
RXN10497.1	A0A498LZC4	0	25.3532
RXN10963.1	A0A498LTM5	24.9313	26.5528
RXN10977.1	A0A498M0S1	22.4141	26.534
RXN11088.1	A0A498LRL2	26.3657	26.0606
RXN11305.1	A0A498M0X4	0	23.9884
RXN11344.1	A0A498LWW5	22.2272	25.7806
RXN12071.1	A0A498LV45	22.0622	0
RXN12513.1	A0A498LY84	23.3985	24.0308
RXN12623.1	A0A498LYK0	0	24.5306
RXN12803.1	A0A498LZ39	24.3041	0
RXN12837.1	A0A498M6L9	24.574	27.1644
RXN13042.1	A0A498LN23	0	22.158
RXN13141.1	A0A498LY36	23.4421	23.6411
RXN13913.1	A0A498M237	0	24.3802
RXN14051.1	A0A498M0K0	0	21.8629
RXN14139.1	A0A498LZX9	0	23.9565
RXN14141.1	A0A498M0T0	22.4313	0
RXN15428.1	A0A498M3J2	0	23.9883
RXN15525.1	A0A498MDH4	0	22.43
RXN15578.1	A0A498M409	29.087	25.0403
RXN16193.1	A0A498M8I5	22.393	25.373
RXN16615.1	A0A498MGP3	22.2376	0
RXN16627.1	A0A498MHY3	25.7688	25.1197
RXN17032.1	A0A498MC78	0	23.3768
RXN17105.1	A0A498MIB9	0	25.4242
RXN17120.1	A0A498M9V9	23.2578	0
RXN17286.1	A0A498MDW1	27.3848	31.3881
RXN17349.1	A0A498M8N9	24.8392	27.2516
RXN17531.1	A0A498M9R9	25.5882	0
RXN17622.1	A0A498ME27	0	24.3074
RXN18799.1	A0A498MCG5	23.5967	25.3645
RXN18857.1	A0A498MPE4	0	22.8434
RXN19465.1	A0A498MQY2	27.5426	0
RXN19486.1	A0A498MKZ5	0	26.0329
RXN19579.1	A0A498MEF9	0	22.0758
RXN19867.1	A0A498MSK6	21.686	0
RXN20039.1	A0A498MFP2	0	34.5789
RXN20181.1	A0A498MGG0	0	24.6072
RXN20621.1	A0A498MHL4	24.0381	27.1239
RXN20766.1	A0A498MQB2	24.22	0
RXN21339.1	A0A498MJ23	22.8567	0
RXN21481.1	A0A498MK82	24.9161	26.1434
RXN21529.1	A0A498MJQ0	23.7841	26.7715
RXN21606.1	A0A498MTA8	26.054	30.4887
RXN22173.1	A0A498MQR6	24.0733	0
RXN22186.1	A0A498LHC0	0	26.3348
RXN22645.1	A0A498N183	0	26.0335
RXN22903.1	A0A498MSN7	0	28.9242
RXN23002.1	A0A498MTH9	23.5506	22.2956
RXN23178.1	A0A498MNX5	0	22.642
RXN23993.1	A0A498MW00	0	26.0671
RXN24687.1	A0A498N7U1	0	26.599
RXN24852.1	A0A498MZC7	26.8819	0
RXN24952.1	A0A498MZL1	24.4891	0
RXN25260.1	A0A498MWX7	28.9963	26.8477
RXN25330.1	A0A498MX40	0	22.4065
RXN26104.1	A0A498N309	0	24.4309
RXN26426.1	A0A498N771	26.3422	30.7053
RXN26499.1	A0A498MWU9	21.7139	25.7139
RXN26805.1	A0A498NBW5	24.9875	27.8614
RXN26926.1	A0A498N8L3	23.4192	0
RXN27358.1	A0A498MZJ9	0	26.1811
RXN27478.1	A0A498MZW6	0	28.2297
RXN27699.1	A0A498N083	0	33.347
RXN27748.1	A0A498N0P9	0	24.409
RXN28474.1	A0A498N9T2	23.2781	21.1805
RXN28526.1	A0A498NC47	26.8372	25.1347
RXN28664.1	A0A498NA94	0	21.8004
RXN28909.1	A0A498N3E7	24.9878	22.8691
RXN29080.1	A0A498N7U4	0	24.5784
RXN29142.1	A0A498NB73	19.5636	0
RXN29248.1	A0A498N552	0	24.5374
RXN29777.1	A0A498NFA9	0	29.8497
RXN30332.1	A0A498ND87	22.0983	0
RXN30731.1	A0A498NFX2	25.1897	0
RXN30912.1	A0A498NGD9	0	20.85
RXN30930.1	A0A498NGG1	21.0054	26.695
RXN31367.1	A0A498NI83	23.5892	25.8647
RXN31413.1	A0A498NHT3	0	24.8561
RXN31669.1	A0A498NIQ8	24.7879	25.7921
RXN31897.1	A0A498NJR7	24.59	25.6855
RXN32175.1	A0A498N8A7	26.5319	28.5157
RXN32529.1	A0A498NL60	0	24.267
RXN32539.1	A0A498NL71	24.6821	0
RXN33058.1	A0A498NMR7	25.5208	24.4825
RXN33077.1	A0A498NI43	0	23.8086
RXN33106.1	A0A498NMV8	22.2994	23.131
RXN33195.1	A0A498NMP8	0	26.8763
RXN33212.1	A0A498NML0	32.3851	35.49
RXN33375.1	A0A498NN73	24.472	0
RXN33546.1	A0A498NP49	0	22.7365
RXN33624.1	A0A498NPR9	24.7451	0
RXN34282.1	A0A498NQE6	20.3162	22.1809
RXN34350.1	A0A498NQL6	0	24.6681
RXN35247.1	A0A498NUU4	23.893	0
RXN36925.1	A0A498NYB9	25.9706	29.7653
RXN02670.1	A0A498L2K9	0	29.9283
RXN02801.1	A0A498L318	23.8599	27.0821
RXN02824.1	A0A498L8U0	0	21.2132
RXN02840.1	A0A498L371	24.2158	0
RXN03773.1	A0A498L8U4	0	22.6074
RXN04123.1	A0A498L9S6	28.6402	30.1259
RXN04189.1	A0A498MBS7	22.1025	26.805
RXN04799.1	A0A498LY45	26.1822	0
RXN05000.1	A0A498L9E6	0	24.6148
RXN05409.1	A0A498LAY2	0	25.8672
RXN05435.1	A0A498LYN1	0	25.0483
RXN05692.1	A0A498LBV2	0	26.1283
RXN05771.1	A0A498MKQ1	21.9714	0
RXN05906.1	A0A498LFY9	25.7724	26.5364
RXN06070.1	A0A498LCW4	0	23.6678
RXN06102.1	A0A498LD43	24.7762	28.1598
RXN06189.1	A0A498LCY6	0	24.9731
RXN06893.1	A0A498LH90	21.7118	21.7561
RXN07576.1	A0A498N9V5	0	20.5584
RXN07610.1	A0A498LHF1	23.361	0
RXN08034.1	A0A498L8S6	0	23.303
RXN08503.1	A0A498LLS6	25.9104	27.3494
RXN08886.1	A0A498LP83	0	26.2748
RXN09647.1	A0A498LWL0	0	25.401
RXN09656.1	A0A498LRE0	27.113	0
RXN09904.1	A0A498LT11	0	26.7396
RXN10047.1	A0A498LXY4	23.2855	0
RXN10095.1	A0A498LXG5	27.3118	24.0761
RXN10332.1	A0A498LRJ7	0	26.0679
RXN10377.1	A0A498LYZ7	0	24.5883
RXN10437.1	A0A498LZ60	0	23.8607
RXN10599.1	A0A498LQC0	0	25.1348
RXN11055.1	A0A498M073	0	23.3212
RXN11205.1	A0A498LBG3	25.5024	25.3687
RXN11278.1	A0A498LS48	22.3154	20.6604
RXN11753.1	A0A498LVV3	23.4815	23.0243
RXN11801.1	A0A498LUE7	22.1482	24.3423
RXN11805.1	A0A498M2A4	0	29.6447
RXN11936.1	A0A498LXK5	31.7584	24.2979
RXN12493.1	A0A498LY63	0	28.6022
RXN12783.1	A0A498LZ18	0	25.8908
RXN12795.1	A0A498M572	21.632	28.3811
RXN12828.1	A0A498LWC4	21.8286	0
RXN13257.1	A0A498M7U4	26.6993	0
RXN14360.1	A0A498M1F3	0	23.7229
RXN16394.1	A0A498MAV9	23.0505	0
RXN16404.1	A0A498MAW9	25.2951	24.0089
RXN16513.1	A0A498M9R3	34.1986	0
RXN16732.1	A0A498MBC6	21.5381	0
RXN16794.1	A0A498LGY3	23.8489	25.0694
RXN17203.1	A0A498MBL7	24.3761	26.1513
RXN17207.1	A0A498MJQ7	0	24.1894
RXN17517.1	A0A498MKL0	0	21.8066
RXN17571.1	A0A498M9V7	25.597	0
RXN17891.1	A0A498MAL6	0	25.1755
RXN18436.1	A0A498MHR0	25.3328	28.8102
RXN18567.1	A0A498MNH5	20.5149	0
RXN18609.1	A0A498MBZ1	0	28.0931
RXN18865.1	A0A498MP51	30.1297	29.7425
RXN19602.1	A0A498L6D4	24.6035	0
RXN19840.1	A0A498MI78	23.1908	24.6318
RXN19865.1	A0A498MSG3	0	24.0202
RXN20031.1	A0A498MG28	0	25.3624
RXN20038.1	A0A498MFM5	25.6726	0
RXN20184.1	A0A498MLE9	26.4234	26.9491
RXN20266.1	A0A498MNM0	24.1723	26.5951
RXN20326.1	A0A498MNT9	26.0185	26.3604
RXN20777.1	A0A498MVG0	26.8884	27.4154
RXN21191.1	A0A498MJE0	0	24.3542
RXN21487.1	A0A498MXY4	22.9252	23.2614
RXN21677.1	A0A498MYU7	0	23.6639
RXN22363.1	A0A498LBD4	27.7704	27.5543
RXN22513.1	A0A498MRM3	21.2789	0
RXN22637.1	A0A498N1H4	21.8017	0
RXN22647.1	A0A498N1I4	25.3869	24.0347
RXN23010.1	A0A498MRG9	22.9857	26.9651
RXN23052.1	A0A498MTL7	0	27.3392
RXN23706.1	A0A498MZN9	21.955	23.122
RXN23751.1	A0A498MSU8	0	27.2742
RXN23755.1	A0A498N4F4	26.6021	0
RXN24052.1	A0A498MWP3	0	20.03
RXN25194.1	A0A498N0B4	0	27.8742
RXN25342.1	A0A498N0M9	23.4849	26.807
RXN25564.1	A0A498N1E0	0	20.8645
RXN25820.1	A0A498MYF0	23.7394	0
RXN26085.1	A0A498LAN4	0	22.5174
RXN26344.1	A0A498N3P9	22.5522	23.8459
RXN26464.1	A0A498P2C4	0	25.7691
RXN26818.1	A0A498MXZ5	0	26.2532
RXN26833.1	A0A498N3S1	0	26.455
RXN26913.1	A0A498N3Z0	24.4939	0
RXN27925.1	A0A498NDM4	0	23.511
RXN27990.1	A0A498N4L7	21.2029	27.8976
RXN28067.1	A0A498NE60	25.7315	23.1873
RXN28151.1	A0A498N5R3	0	22.2635
RXN28219.1	A0A498N1Q0	0	23.4779
RXN28223.1	A0A498N7N0	26.8815	24.4923
RXN28225.1	A0A498NDZ0	24.5459	0
RXN28628.1	A0A498N377	23.3988	28.8097
RXN28722.1	RXN28722.1	0	27.6047
RXN28859.1	A0A498N3A5	22.5804	25.3334
RXN28883.1	A0A498N9B6	0	21.8963
RXN28900.1	A0A498N748	22.8123	22.005
RXN28930.1	A0A498N7E8	24.7564	25.763
RXN29156.1	A0A498ND79	25.0227	27.1912
RXN30161.1	A0A498NAP7	24.0679	26.364
RXN30391.1	A0A498NB68	0	25.7361
RXN30424.1	A0A498NDL5	0	24.6414
RXN30429.1	A0A498N7L6	0	25.22
RXN30481.1	A0A498NBE3	25.493	32.0004
RXN30514.1	A0A498NDR0	0	26.501
RXN31460.1	A0A498NHX9	0	25.4582
RXN31778.1	A0A498NIW4	35.818	28.8767
RXN31833.1	A0A498NJ04	24.5776	26.4899
RXN31902.1	A0A498NJ09	24.3816	32.2148
RXN31959.1	A0A498NJK5	0	26.913
RXN32558.1	A0A498NL76	22.4724	22.3191
RXN33068.1	A0A498NMS8	23.3085	0
RXN33378.1	A0A498NNN0	22.2644	0
RXN33407.1	A0A498NPD7	24.0517	24.7945
RXN33599.1	A0A498NPF6	0	24.8356
RXN34175.1	A0A498NQC9	23.733	27.0908
RXN34476.1	A0A498NRS4	0	26.2677
RXN34578.1	A0A498NS37	0	24.8943
RXN34722.1	A0A498NRM4	0	23.1855
RXN34815.1	A0A498NS72	0	25.6598
RXN35213.1	A0A498NTC7	0	26.9154
RXN35412.1	A0A498NTF7	0	26.9446
RXN36175.1	A0A498NW20	25.7407	27.2791
RXN37108.1	A0A498NZ89	25.1771	24.8841
RXN37124.1	A0A498P0P1	20.4889	0
RXN38961.1	A0A498P431	0	24.4547
RXN02335.1	A0A498MMI0	25.2985	22.3057
RXN02391.1	A0A498L1U6	0	24.4303
RXN02948.1	A0A498L4B7	24.7473	0
RXN03777.1	A0A498LDE1	0	27.3475
RXN04541.1	A0A498L837	0	26.8019
RXN04546.1	A0A498LC95	0	25.9296
RXN05171.1	A0A498L9Y5	23.0449	0
RXN05374.1	A0A498LFE7	22.5387	0
RXN05389.1	A0A498MW39	23.4811	24.8057
RXN05911.1	A0A498LC83	25.6072	0
RXN06001.1	A0A498LCK2	25.4633	0
RXN06033.1	A0A498LEZ0	24.501	24.6872
RXN06280.1	A0A498M794	21.7591	0
RXN06916.1	A0A498LIS4	23.9843	0
RXN08717.1	A0A498LTF9	0	24.342
RXN08736.1	A0A498MHN6	24.8535	22.3739
RXN10118.1	A0A498LNV7	22.4654	25.5558
RXN10253.1	A0A498LRE4	0	29.5125
RXN10330.1	A0A498LQ81	24.0436	0
RXN10591.1	A0A498LR71	22.1562	0
RXN10661.1	A0A498LRE1	20.2586	26.3245
RXN11122.1	A0A498LTW5	0	27.7713
RXN11157.1	A0A498M1B4	21.5468	27.1039
RXN11182.1	A0A498LU25	23.1329	0
RXN11710.1	A0A498N5G2	0	25.6776
RXN12562.1	A0A498LYU8	23.9092	24.9491
RXN12610.1	A0A498LWP3	22.2224	23.6702
RXN12630.1	A0A498LWR2	0	24.4337
RXN12914.1	A0A498M1G4	0	24.7189
RXN13166.1	A0A498M118	23.6597	24.1612
RXN13940.1	A0A498M080	25.5256	0
RXN13949.1	A0A498LZE6	0	23.0298
RXN14315.1	A0A498M9V8	0	28.452
RXN15130.1	A0A498M3M6	27.8939	25.6174
RXN15149.1	A0A498M2R2	0	21.7576
RXN15359.1	A0A498M3B5	0	26.5523
RXN15568.1	A0A498M3Z6	32.6643	37.8773
RXN15692.1	A0A498M8Q5	24.2086	0
RXN15805.1	A0A498ME85	25.8939	31.7817
RXN15959.1	A0A498M509	25.1986	26.2311
RXN15981.1	A0A498M5X0	0	23.9095
RXN16332.1	A0A498MA95	28.4777	20.8616
RXN16355.1	A0A498MFU8	0	26.1405
RXN16388.1	A0A498M656	22.812	0
RXN16402.1	A0A498MAG6	0	27.4431
RXN16468.1	A0A498M6D2	0	23.8199
RXN16629.1	A0A498M6V3	23.4752	25.3721
RXN16811.1	A0A498M820	0	30.5438
RXN16989.1	A0A498M7R6	0	24.5874
RXN16998.1	A0A498M7T0	27.2856	26.0278
RXN17023.1	A0A498MAZ7	0	25.0126
RXN17123.1	A0A498MB87	0	26.7725
RXN17501.1	A0A498LJH9	0	20.9712
RXN17686.1	A0A498MFD4	0	24.5282
RXN17705.1	A0A498MK73	24.2917	28.7971
RXN18118.1	A0A498NWS8	0	26.0416
RXN18205.1	A0A498MLW3	25.9521	30.8388
RXN18533.1	A0A498MFE1	0	23.6526
RXN19759.1	A0A498MEX1	0	22.5114
RXN20063.1	A0A498MJT7	26.0194	25.3637
RXN20464.1	A0A498MM56	27.7004	29.7137
RXN20574.1	A0A498MMI4	27.062	26.808
RXN20586.1	A0A498MPQ1	23.3382	25.9617
RXN20587.1	A0A498MUR0	29.679	24.6655
RXN20617.1	A0A498MUU2	25.7567	29.4966
RXN21078.1	A0A498MID9	0	28.0053
RXN21084.1	A0A498MP00	0	22.1661
RXN21342.1	A0A498MNX8	0	25.3077
RXN21444.1	A0A498MPZ9	0	29.1434
RXN21501.1	A0A498MKA5	21.4675	0
RXN21518.1	A0A498MJI1	0	25.1144
RXN21536.1	A0A498MT19	25.4762	0
RXN21624.1	A0A498MQK5	0	23.8887
RXN21881.1	A0A498MLK0	0	26.8526
RXN21926.1	A0A498MUN0	26.2465	23.0409
RXN22264.1	A0A498MSB3	23.1036	23.061
RXN22310.1	A0A498MPN9	0	26.0997
RXN22343.1	A0A498MR76	22.4949	27.7709
RXN22540.1	A0A498MQA7	23.6329	21.1119
RXN22664.1	A0A498MTC9	0	24.5441
RXN22842.1	A0A498MT57	22.5958	23.7557
RXN22905.1	A0A498N1Z5	23.0362	24.9876
RXN22963.1	A0A498MSV3	26.065	23.7089
RXN23255.1	A0A498N326	22.1236	26.9949
RXN23343.1	A0A498MRU4	25.6364	0
RXN23419.1	A0A498NFP5	0	22.6171
RXN23765.1	A0A498N4G3	26.1509	23.7444
RXN24121.1	A0A498MU58	24.1075	27.209
RXN24927.1	A0A498N8H1	33.0784	24.5644
RXN25437.1	A0A498N9Q8	0	25.9567
RXN25577.1	A0A498NA38	0	25.7435
RXN25611.1	A0A498MYN3	27.2223	25.0075
RXN25879.1	A0A498L1B2	0	22.7918
RXN26345.1	A0A498NAX1	32.737	36.7318
RXN26630.1	A0A498N0P4	0	25.5165
RXN26777.1	A0A498NCK2	23.192	24.8539
RXN26829.1	A0A498MXS1	21.3636	26.8338
RXN26854.1	A0A498N5A5	22.3169	0
RXN27191.1	A0A498N353	25.4775	0
RXN27709.1	A0A498N094	22.7939	22.9499
RXN27777.1	A0A498NDX8	0	25.6457
RXN27790.1	A0A498N424	25.9743	0
RXN27823.1	A0A498NZL4	0	23.8034
RXN27853.1	A0A498N6L4	0	24.0185
RXN27935.1	A0A498NDM8	23.6471	0
RXN27948.1	A0A498N171	23.7025	0
RXN28119.1	A0A498N1F4	0	23.9067
RXN28782.1	A0A498NAC9	0	23.7189
RXN28947.1	A0A498NEV1	23.952	0
RXN29076.1	A0A498ND37	0	25.5559
RXN29253.1	A0A498NA51	22.7874	25.0322
RXN29711.1	A0A498LMI2	23.2026	22.7007
RXN29782.1	A0A498NCD2	0	25.9581
RXN29889.1	A0A498N637	27.9273	29.7272
RXN29890.1	A0A498NA00	28.4134	30.0379
RXN30962.1	A0A498NGI1	26.9023	29.4369
RXN31008.1	A0A498NGQ8	23.4201	26.1938
RXN31038.1	A0A498NGU3	21.6856	26.9516
RXN31451.1	A0A498NI01	25.1146	25.9021
RXN32000.1	A0A498NJ89	0	23.9487
RXN32274.1	A0A498NKP3	25.7953	26.1621
RXN32682.1	A0A498NL81	0	25.382
RXN33180.1	A0A498L9L3	22.1724	24.3147
RXN33604.1	A0A498NPP7	22.9024	24.1476
RXN33757.1	A0A498NQE4	0	25.5115
RXN33762.1	A0A498NP11	24.2303	0
RXN33782.1	A0A498NP29	0	25.4149
RXN34042.1	A0A498NPR6	0	25.939
RXN34423.1	RXN34423.1	22.0179	0
RXN34505.1	A0A498NRA9	0	25.3965
RXN34510.1	A0A498NR16	22.9306	24.5241
RXN34817.1	A0A498NTJ7	24.7478	25.294
RXN34839.1	A0A498NTA4	26.4643	26.6512
RXN34998.1	A0A498NTG3	0	23.5583
RXN35182.1	A0A498NSS4	0	23.9954
RXN35259.1	A0A498NUI3	0	25.6224
RXN36988.1	A0A498MFZ0	23.2111	22.0837
RXN37196.1	A0A498NZS0	21.6491	26.6305
RXN37285.1	A0A498NZA3	24.0861	23.901
RXN37462.1	A0A498NGF1	27.2715	26.0799
RXN38532.1	A0A498P1N8	0	23.0388
RXN38595.1	A0A498P307	25.2101	26.0238
RXN38976.1	A0A498P4Y1	0	23.952
RXN39269.1	A0A498P6G7	21.5883	25.5958
RXN02321.1	A0A498L1L1	27.5019	0
RXN02855.1	A0A498LC17	0	33.085
RXN03352.1	A0A498L4N8	0	21.2316
RXN03442.1	A0A498L4Y6	23.8431	0
RXN03807.1	A0A498LDH3	0	23.5262
RXN04327.1	A0A498LF21	23.1931	23.6737
RXN05181.1	A0A498L9Z2	0	22.5923
RXN05914.1	A0A498LGU7	0	24.071
RXN06241.1	A0A498LDA8	26.0477	27.19
RXN06782.1	A0A498LFK8	0	25.9035
RXN06877.1	A0A498LMU5	23.1583	25.8466
RXN07042.1	A0A498LGJ5	24.9038	26.5542
RXN07145.1	A0A498LP67	26.0191	28.2591
RXN07949.1	A0A498LHZ4	26.5611	24.0055
RXN08041.1	A0A498L5Y4	25.1248	26.5477
RXN08726.1	A0A498LK00	21.5415	0
RXN08773.1	A0A498LMG7	29.1711	28.4442
RXN08839.1	A0A498LKD0	25.9547	26.5926
RXN08911.1	A0A498LLL7	0	23.5957
RXN08990.1	A0A498LL84	25.7272	0
RXN09174.1	A0A498LR20	0	30.3454
RXN09712.1	A0A498LPK8	21.7423	26.8807
RXN09735.1	A0A498LWK4	24.8192	0
RXN10129.1	A0A498LP20	25.9722	0
RXN10162.1	A0A498LR06	26.9146	29.3532
RXN10201.1	A0A498LQ34	0	22.1568
RXN10236.1	A0A498LT02	0	26.2115
RXN10360.1	A0A498LQB2	0	25.9621
RXN10369.1	A0A498LPN6	22.9027	27.3194
RXN10382.1	A0A498LRP5	0	28.6031
RXN10815.1	A0A498LZI8	21.9778	0
RXN11245.1	A0A498M0R9	23.8474	0
RXN11254.1	A0A498LWN3	0	23.6331
RXN11655.1	A0A498M1W5	24.2987	27.0395
RXN12068.1	A0A498LUD4	0	26.0897
RXN12820.1	A0A498LX98	21.4578	26.2555
RXN14014.1	A0A498M4C1	25.6502	0
RXN14630.1	A0A498M262	0	25.6825
RXN14856.1	A0A498M5U6	24.8125	24.0432
RXN15331.1	A0A498M459	27.1314	27.8459
RXN15440.1	A0A498M4J4	0	24.9443
RXN15694.1	A0A498M8Y8	0	24.4362
RXN16125.1	A0A498MF51	27.5493	25.7364
RXN16919.1	A0A498LDV6	20.5424	25.6098
RXN16993.1	A0A498MAX0	0	25.9061
RXN17174.1	A0A498MD06	0	22.2141
RXN17265.1	A0A498LNQ2	0	27.3162
RXN17309.1	A0A498M8K8	0	25.2153
RXN17549.1	A0A498M948	0	31.6619
RXN18876.1	A0A498MJ33	26.9024	26.5943
RXN18911.1	A0A498MD67	20.3333	23.4701
RXN19037.1	A0A498MPI7	0	25.042
RXN19133.1	A0A498NX28	0	28.4674
RXN19265.1	A0A498MQC4	24.0655	29.1507
RXN19926.1	A0A498MMK2	20.9628	27.1494
RXN20035.1	A0A498MT89	24.4683	29.1381
RXN20080.1	A0A498MIU3	23.5676	0
RXN20307.1	A0A498LYF0	0	27.9533
RXN20468.1	A0A498MGT9	23.3974	26.631
RXN20797.1	A0A498MVI3	26.8423	25.4749
RXN21151.1	A0A498MJ94	0	24.5798
RXN21331.1	A0A498MJT0	26.805	0
RXN21392.1	A0A498MP26	24.4891	0
RXN21589.1	A0A498MJV6	22.0634	0
RXN21785.1	A0A498MZB0	0	25.3449
RXN22195.1	A0A498MZZ1	0	24.9133
RXN22295.1	A0A498N086	22.2105	23.3707
RXN22591.1	A0A498MP23	27.329	0
RXN22644.1	A0A498MTA7	22.056	26.8317
RXN23140.1	A0A498LMP5	25.1871	23.887
RXN23618.1	A0A498MQ10	23.3947	26.4146
RXN23904.1	A0A498MWR2	29.0078	31.1361
RXN24478.1	A0A498MS83	24.5636	26.4776
RXN24532.1	A0A498MYF6	22.0418	26.3938
RXN24760.1	A0A498MVJ2	0	25.6186
RXN24828.1	A0A498MT60	25.4457	28.0459
RXN24840.1	A0A498MVQ4	22.7754	26.6622
RXN25012.1	A0A498MZR1	0	25.4623
RXN25293.1	A0A498MZH9	22.9206	25.591
RXN25525.1	A0A498N963	21.9442	26.1098
RXN25550.1	A0A498MXP6	0	30.6642
RXN25904.1	A0A498N2F6	0	27.0216
RXN26026.1	A0A498N629	26.7418	23.6125
RXN26263.1	A0A498N280	0	32.4945
RXN26452.1	A0A498N3Q8	0	23.3823
RXN26577.1	A0A498NC80	27.6912	0
RXN26781.1	A0A498N1Y3	22.9038	0
RXN26974.1	A0A498N5M2	0	25.9307
RXN27010.1	A0A498N1T0	22.4562	26.8074
RXN27192.1	A0A498N662	22.4357	26.9781
RXN27561.1	A0A498N460	0	19.4296
RXN27612.1	A0A498N7E2	24.127	26.5125
RXN27642.1	A0A498N7H5	22.4502	27.5223
RXN27721.1	A0A498N4K4	21.837	22.9817
RXN28672.1	A0A498NA39	22.9116	27.1804
RXN28800.1	A0A498N6V4	25.5709	0
RXN28928.1	A0A498N489	26.2162	31.1329
RXN29072.1	A0A498NB21	22.3688	25.5943
RXN29106.1	A0A498ND52	23.9208	0
RXN29698.1	A0A498N6E5	0	24.7458
RXN29794.1	A0A498NCP1	0	22.2317
RXN30866.1	A0A498NGA8	0	27.1463
RXN30896.1	A0A498NW67	22.244	26.8103
RXN31020.1	A0A498NGQ1	25.1265	23.0889
RXN31370.1	A0A498NHP2	26.9318	26.0384
RXN31500.1	A0A498NI11	0	24.3849
RXN31622.1	A0A498NIB6	23.2809	23.7918
RXN31896.1	A0A498NJB3	25.341	25.3535
RXN31912.1	A0A498L8Q6	0	25.792
RXN31989.1	A0A498NJN5	0	27.5319
RXN32721.1	A0A498NLK2	23.5831	30.3403
RXN32774.1	A0A498NM47	24.4723	26.6879
RXN32782.1	A0A498NLG1	0	25.8161
RXN32884.1	A0A498NME5	24.9673	0
RXN32890.1	A0A498NLN5	27.5489	24.1799
RXN33513.1	A0A498NNN3	25.1691	0
RXN33561.1	A0A498NP17	0	25.9282
RXN33674.1	A0A498NQ36	22.5983	0
RXN33738.1	A0A498NPT3	27.0925	24.8048
RXN33829.1	A0A498NQ53	24.1638	23.9193
RXN33853.1	A0A498NPL1	0	27.5378
RXN34795.1	A0A498NS52	0	25.1593
RXN34862.1	A0A498NRZ2	23.9072	0
RXN35249.1	A0A498NUH3	24.9154	29.0761
RXN35329.1	A0A498NUQ3	0	25.6749
RXN35416.1	A0A498NUS0	0	22.8087
RXN35533.1	A0A498NU86	0	27.9239
RXN35990.1	A0A498NV01	0	23.5833
RXN36334.1	A0A498NYC1	0	27.5249
RXN36473.1	A0A498M6L4	0	21.5613
RXN37232.1	A0A498NY70	0	23.8755
RXN38296.1	A0A498P302	0	27.5695
RXN38989.1	A0A498P5M4	23.8329	27.7661
RXN39367.1	A0A498P7G2	0	26.6424
RXN02462.1	A0A498MIP6	25.4304	26.9184
RXN02713.1	A0A498L5L4	23.1401	0
RXN02815.1	A0A498LBX2	0	28.1984
RXN02949.1	A0A498L3Z8	26.7023	27.259
RXN04132.1	A0A498L7A1	26.2917	0
RXN04151.1	A0A498L6Z5	24.2668	28.208
RXN04440.1	A0A498L7Y3	0	24.6359
RXN04619.1	A0A498L8Q0	22.6753	32.3467
RXN05038.1	A0A498LA35	25.005	31.8012
RXN05403.1	A0A498MH32	0	27.9275
RXN05672.1	A0A498LBT3	0	25.0676
RXN06009.1	A0A498LCF8	25.1615	22.4925
RXN06197.1	A0A498LKP9	0	22.0403
RXN06421.1	A0A498LDW2	0	25.3508
RXN06551.1	A0A498LE85	0	25.9174
RXN07007.1	A0A498LN76	0	26.6616
RXN07108.1	A0A498LFM5	0	25.7794
RXN07111.1	A0A498LG39	21.3856	0
RXN07158.1	A0A498LFS7	0	22.0255
RXN07295.1	A0A498LPL2	25.9482	31.2892
RXN07311.1	A0A498LGN8	24.3666	22.9065
RXN08496.1	A0A498LN61	29.1285	28.7119
RXN08957.1	A0A498LU62	25.9163	28.5641
RXN08974.1	A0A498LQI4	25.7657	28.1304
RXN08991.1	A0A498LLT9	28.3716	26.5394
RXN09249.1	A0A498LLG8	35.7025	31.8484
RXN09415.1	A0A498LVR3	0	23.7566
RXN10038.1	A0A498LNL7	0	21.0136
RXN10222.1	A0A498LR76	31.974	37.016
RXN10375.1	A0A498LYA4	24.2936	0
RXN10575.1	A0A498LYU7	27.9381	28.4955
RXN11521.1	A0A498LTL5	23.3431	0
RXN11550.1	A0A498LTV9	0	23.0478
RXN11668.1	A0A498LT82	24.1536	26.0727
RXN11773.1	A0A498LVX1	21.0354	27.548
RXN11913.1	A0A498LWH2	0	29.5924
RXN11935.1	A0A498M2P5	22.8288	0
RXN12089.1	A0A498LUH0	0	28.0994
RXN12098.1	A0A498LUG3	21.937	25.6745
RXN12627.1	A0A498M607	0	25.6274
RXN12802.1	A0A498LZJ7	21.949	0
RXN12892.1	A0A498LJT3	27.9955	27.1922
RXN12940.1	A0A498LXI8	0	26.6608
RXN14055.1	A0A498M8Y5	22.2313	0
RXN14299.1	A0A498NE56	26.8003	22.9333
RXN15504.1	A0A498M8G5	22.8069	0
RXN15562.1	A0A498L5Q4	0	21.5568
RXN16072.1	A0A498M9J9	0	26.0756
RXN16082.1	A0A498M9K7	0	25.9906
RXN16850.1	A0A498LFT0	0	23.6126
RXN16973.1	A0A498MAV4	0	25.7441
RXN17080.1	A0A498NMU3	22.598	29.7669
RXN17816.1	A0A498MFR5	0	25.8574
RXN18192.1	A0A498MFQ9	0	22.2908
RXN18251.1	A0A498MBF7	0	25.8945
RXN18774.1	A0A498MHF5	0	25.9461
RXN19069.1	A0A498MD56	24.4583	26.598
RXN20005.1	A0A498MT53	26.3081	0
RXN20261.1	A0A498MGP6	26.3746	24.6916
RXN20618.1	A0A498MH55	33.914	31.7137
RXN20678.1	A0A498MHB7	22.1886	0
RXN21367.1	A0A498MXH8	27.8757	29.7397
RXN21449.1	A0A498MJC7	0	26.0023
RXN21458.1	A0A498MJD4	24.0129	29.1425
RXN21942.1	A0A498MQQ6	23.5169	23.8025
RXN22278.1	A0A498MLK3	0	27.2607
RXN22485.1	A0A498N0S3	22.7606	25.1416
RXN22619.1	A0A498MMD9	24.4836	0
RXN22843.1	A0A498MSI0	0	23.4899
RXN23053.1	A0A498MT67	21.1853	29.9997
RXN23267.1	A0A498N3E3	27.3548	29.2738
RXN23301.1	A0A498MR96	25.3333	0
RXN23432.1	A0A498MUV0	24.3859	24.415
RXN24125.1	A0A498N5E0	22.2698	0
RXN24614.1	A0A498MYL9	0	22.4693
RXN24669.1	A0A498MSK4	24.7228	0
RXN24713.1	A0A498MXZ7	24.8484	25.4665
RXN24761.1	A0A498MWC6	0	25.3673
RXN25121.1	A0A498MXC3	0	24.7384
RXN25212.1	A0A498N0A5	0	29.0454
RXN25316.1	A0A498N459	0	25.927
RXN25356.1	A0A498N4A0	0	26.0697
RXN25431.1	A0A498MY60	21.8715	25.1407
RXN25509.1	A0A498MUC4	23.4918	25.0287
RXN25613.1	A0A498N0E1	0	21.9875
RXN25737.1	A0A498NAG6	21.6005	29.0073
RXN25905.1	A0A498N9Y6	22.7618	0
RXN26163.1	A0A498N201	24.4234	28.0168
RXN26187.1	A0A498N4G1	25.1644	24.8398
RXN26229.1	A0A498MVZ4	0	25.7379
RXN26260.1	A0A498MZK9	23.0596	26.0195
RXN26339.1	A0A498MWE6	23.3842	25.1344
RXN26397.1	A0A498NBW8	0	24.1269
RXN26458.1	A0A498P1K8	20.9787	21.6201
RXN26617.1	A0A498NCA7	21.4651	28.9196
RXN26635.1	A0A498NBJ5	23.039	0
RXN26832.1	A0A498N4U7	25.7982	29.0165
RXN26845.1	A0A498NBY8	28.0078	24.1037
RXN26846.1	A0A498N8D7	24.4219	28.3049
RXN27055.1	A0A498NCB2	21.9173	0
RXN27266.1	A0A498N9D0	20.7997	28.5813
RXN27672.1	A0A498N6I1	0	24.2114
RXN27708.1	A0A498N0L6	24.2872	23.848
RXN27873.1	A0A498N6N5	26.6884	30.883
RXN27966.1	A0A498NAW2	0	20.1392
RXN28069.1	A0A498N1A5	23.3529	0
RXN28070.1	A0A498N4V9	26.3559	30.3867
RXN28218.1	A0A498N236	36.5372	40.9101
RXN28302.1	A0A498N968	26.178	24.7383
RXN28620.1	A0A498N6C7	0	27.7195
RXN29330.1	A0A498NQ43	0	26.0422
RXN29635.1	A0A498NF29	24.3191	28.6071
RXN29770.1	A0A498N9R5	27.7608	0
RXN29872.1	A0A498NCJ1	0	26.8587
RXN30186.1	A0A498NED7	27.5473	22.4222
RXN30218.1	A0A498N7R7	22.2228	24.1753
RXN30431.1	A0A498NBA2	0	26.0806
RXN30591.1	A0A498MVT9	23.8996	28.6864
RXN31093.1	A0A498NGW6	26.2542	26.4383
RXN31835.1	A0A498NJ31	23.0644	27.8012
RXN31891.1	A0A498NJ63	21.9744	25.7042
RXN32400.1	A0A498NKD0	28.6224	21.9349
RXN33598.1	A0A498NPE6	0	23.1936
RXN34068.1	A0A498NQN9	0	23.3106
RXN34504.1	A0A498NSI9	0	24.5687
RXN34548.1	A0A498NS04	0	26.0686
RXN34608.1	A0A498NS65	0	26.5685
RXN34937.1	A0A498NTX3	0	22.4709
RXN35025.1	A0A498NSQ3	0	26.9467
RXN35463.1	A0A498NU21	26.6339	0
RXN35466.1	A0A498NUW6	26.971	26.6774
RXN36502.1	A0A498NWE3	0	27.9728
RXN37275.1	A0A498NZ94	28.6186	0
RXN02438.1	A0A498L2U2	23.1158	26.2428
RXN03819.1	A0A498L6D9	26.739	0
RXN04680.1	A0A498L8L8	21.8181	23.374
RXN05583.1	A0A498LDT8	27.1348	27.1605
RXN06310.1	A0A498LDJ8	0	23.7953
RXN06332.1	A0A498LDT5	23.2149	29.1923
RXN06930.1	A0A498MSB4	27.176	30.8791
RXN07126.1	A0A498LJ97	23.8792	23.2938
RXN07330.1	A0A498LGM3	0	26.9654
RXN07649.1	A0A498LH59	26.492	27.6538
RXN07897.1	A0A498MFA2	23.7654	21.9459
RXN08660.1	A0A498LKB6	27.9347	28.3869
RXN08708.1	A0A498LK20	0	26.2482
RXN08771.1	A0A498LL89	22.7334	24.1802
RXN08815.1	A0A498LTW8	22.6396	26.2835
RXN09079.1	A0A498LL08	0	27.6333
RXN09354.1	A0A498LRI3	25.1892	23.9404
RXN09718.1	A0A498LMR9	21.3069	24.8068
RXN09719.1	A0A498LMW6	28.0583	27.7101
RXN10248.1	A0A498LP95	27.7303	0
RXN11202.1	A0A498L8L0	22.436	0
RXN11319.1	A0A498LSC4	29.1065	27.0665
RXN11403.1	A0A498LUV3	0	26.2599
RXN11812.1	A0A498LW93	0	24.5033
RXN11973.1	A0A498LWN4	0	25.6523
RXN12396.1	A0A498LYV2	0	24.118
RXN12535.1	A0A498M4G6	0	23.3684
RXN12561.1	A0A498LWG8	22.9604	24.3842
RXN12793.1	A0A498LZ25	24.2033	25.7299
RXN12794.1	A0A498M147	27.56	33.6812
RXN12829.1	A0A498LWF7	0	24.6725
RXN13301.1	A0A498LYJ4	21.8883	0
RXN13605.1	A0A498M7K2	0	25.2257
RXN13954.1	A0A498N7B5	25.086	25.3288
RXN13975.1	A0A498M8P4	0	23.5439
RXN14037.1	A0A498MA66	0	31.5748
RXN14348.1	A0A498LRG8	25.1023	0
RXN14569.1	A0A498M162	26.0542	0
RXN15369.1	A0A498M3C3	22.4465	24.2867
RXN15487.1	A0A498MEP5	21.3584	0
RXN16015.1	A0A498LLF6	0	22.3762
RXN16166.1	A0A498LDS4	23.7157	26.9448
RXN16992.1	A0A498MC33	23.6581	27.505
RXN17026.1	A0A498MD47	23.3417	26.9597
RXN17114.1	A0A498MCU8	25.522	0
RXN17150.1	A0A498MVQ1	25.8791	27.8433
RXN17743.1	A0A498MD49	22.1763	24.7372
RXN17837.1	A0A498MLI9	26.3835	26.4013
RXN17997.1	A0A498MLY0	0	24.1285
RXN18017.1	A0A498MLZ6	29.6224	26.9703
RXN18057.1	A0A498MM36	0	24.3591
RXN18190.1	A0A498MD95	0	24.6338
RXN18278.1	A0A498MB05	26.7463	27.0448
RXN18293.1	A0A498MER3	21.5649	25.814
RXN18384.1	A0A498MG85	26.3125	19.8627
RXN19234.1	A0A498MIQ9	23.7963	0
RXN19280.1	A0A498MGL9	29.4259	29.8004
RXN20571.1	A0A498MHG4	23.6095	27.2513
RXN20623.1	A0A498MLG0	0	25.8954
RXN20735.1	A0A498MVT8	0	30.5201
RXN20781.1	A0A498MI27	23.1161	27.8121
RXN21330.1	A0A498MM46	24.4406	23.839
RXN22302.1	A0A498MRW3	0	23.5428
RXN22599.1	A0A498MMC0	0	22.7809
RXN22635.1	A0A498N173	0	26.9267
RXN22909.1	A0A498MN46	0	26.3799
RXN23018.1	A0A498MNH9	27.5034	25.1167
RXN23089.1	A0A498MNL5	0	24.3734
RXN23220.1	A0A498MRY7	21.6639	24.378
RXN23290.1	A0A498LGP1	23.378	31.0302
RXN23437.1	A0A498NXY1	0	28.6352
RXN23557.1	A0A498N487	28.2171	28.5359
RXN23875.1	A0A498N4Q4	0	26.6007
RXN24131.1	A0A498MU70	25.0177	27.5958
RXN24522.1	A0A498MYE6	30.2541	27.4006
RXN24558.1	A0A498MSF0	26.8436	27.2241
RXN24696.1	A0A498N2G0	0	26.5166
RXN24841.1	A0A498MWJ6	22.525	25.7777
RXN25836.1	A0A498N5K8	0	26.1349
RXN26009.1	A0A498MVF6	0	22.9114
RXN26295.1	A0A498NAT0	0	22.2341
RXN26308.1	A0A498MWM1	0	26.1517
RXN26396.1	A0A498N739	0	23.3851
RXN26562.1	A0A498N415	21.9751	0
RXN26621.1	A0A498N1I5	0	26.987
RXN26645.1	A0A498NBJ7	0	28.1468
RXN26993.1	A0A498N464	0	21.8315
RXN27361.1	A0A498N3M1	26.3241	31.1949
RXN27693.1	A0A498N668	23.8717	0
RXN27772.1	A0A498N7W1	0	26.9274
RXN27820.1	A0A498N453	0	24.0084
RXN27931.1	A0A498N571	24.7992	0
RXN28025.1	A0A498NDR9	23.2481	0
RXN28235.1	A0A498MR44	0	23.7301
RXN28369.1	A0A498N220	25.695	31.9489
RXN28614.1	A0A498NA52	24.4889	0
RXN28705.1	A0A498NED9	25.1213	0
RXN29019.1	A0A498N3Q3	0	25.82
RXN29108.1	A0A498N4R1	0	26.228
RXN29205.1	A0A498NET5	22.1242	28.7676
RXN29784.1	A0A498NCN4	22.7618	23.0606
RXN29901.1	A0A498NA34	26.8704	0
RXN30176.1	A0A498NED4	25.5131	24.4085
RXN30783.1	A0A498LFI5	25.1046	23.0963
RXN30936.1	A0A498NGH7	27.3467	25.4001
RXN31009.1	A0A498NGP6	25.6818	27.9949
RXN31276.1	A0A498NHG6	0	24.0649
RXN31379.1	A0A498NHT1	23.9955	25.2376
RXN31492.1	A0A498NM51	25.2814	29.4079
RXN31840.1	A0A498NIT8	25.615	24.5483
RXN32019.1	A0A498NJS0	0	26.556
RXN32045.1	A0A498NJN8	0	25.5554
RXN32071.1	A0A498NJP2	25.0211	27.0613
RXN32228.1	A0A498NK38	25.9986	27.4828
RXN32604.1	A0A498MCN8	22.1868	24.9176
RXN32902.1	A0A498NLR3	0	27.7818
RXN33458.1	A0A498NNV5	25.3553	26.9439
RXN33501.1	A0A498NNV7	25.4077	25.9602
RXN33673.1	A0A498NP50	22.9247	26.4989
RXN33899.1	A0A498NQC1	25.6148	29.5239
RXN34610.1	A0A498LA61	23.0146	26.5912
RXN34833.1	A0A498NSC4	23.3639	0
RXN34863.1	A0A498NSE9	25.0679	22.7348
RXN35225.1	A0A498NT72	25.3093	0
RXN35261.1	A0A498NTN3	0	25.4628
RXN35437.1	A0A498NVE1	26.1763	28.2817
RXN36276.1	A0A498NX57	25.3318	29.8549
RXN03772.1	A0A498L5Z7	0	24.0314
RXN04109.1	A0A498L766	0	24.7184
RXN04984.1	A0A498LEJ3	0	28.681
RXN05288.1	A0A498LAT7	25.8117	26.8245
RXN05393.1	A0A498LDC1	27.7548	22.7959
RXN05521.1	A0A498LB15	23.2061	21.7104
RXN05925.1	A0A498LKG8	24.8726	0
RXN06434.1	A0A498LE30	0	24.397
RXN06897.1	A0A498LMW5	26.5034	25.1183
RXN07028.1	A0A498LFE6	23.1085	23.9494
RXN07238.1	A0A498LG03	0	23.9702
RXN07281.1	A0A498LGL1	0	21.4011
RXN07394.1	A0A498LL15	26.9457	24.6914
RXN07536.1	A0A498LKJ5	24.6995	25.2007
RXN07621.1	A0A498LHR7	25.8318	29.9036
RXN08569.1	A0A498LJP4	0	24.5747
RXN08984.1	A0A498LQJ3	0	24.5311
RXN09421.1	A0A498LMZ1	22.1028	26.7602
RXN09923.1	A0A498LQI3	22.0918	27.2718
RXN10044.1	A0A498LTD9	25.7109	28.7404
RXN10336.1	A0A498LT86	30.6209	32.7626
RXN10576.1	A0A498LTY5	21.2028	0
RXN10698.1	A0A498LQJ5	24.5784	22.7016
RXN11042.1	A0A498LPC1	0	25.4567
RXN11220.1	A0A498LSW6	21.2351	27.6753
RXN11298.1	A0A498LNQ8	22.597	27.8794
RXN11919.1	A0A498LU01	0	25.4447
RXN12679.1	A0A498LW32	21.6745	0
RXN13532.1	A0A498M1Y0	23.2584	28.3224
RXN13972.1	A0A498LEV5	24.6699	24.9859
RXN14844.1	A0A498M6K1	0	25.3208
RXN15421.1	A0A498M4E4	28.7526	29.3426
RXN15677.1	A0A498MF85	24.1461	0
RXN15917.1	A0A498MFZ3	0	23.3754
RXN16139.1	A0A498M5H6	24.9614	0
RXN16368.1	A0A498M637	25.9866	0
RXN16785.1	A0A498LKX7	23.7001	24.3239
RXN16863.1	A0A498L1W8	0	24.2894
RXN16955.1	A0A498MHW3	0	23.439
RXN16968.1	A0A498M7Q3	27.2758	0
RXN17028.1	A0A498M7W0	26.7331	27.8169
RXN17043.1	A0A498MB16	0	24.4746
RXN17158.1	A0A498M886	27.8057	29.0261
RXN17216.1	A0A498MDP7	27.5912	26.8002
RXN17326.1	A0A498MDZ5	24.1036	26.1874
RXN17535.1	A0A498MJQ9	26.4213	28.4183
RXN17627.1	A0A498MKX6	27.7295	27.8356
RXN17987.1	A0A498MLX6	23.747	29.0704
RXN18019.1	A0A498MAC6	26.7093	26.7841
RXN18223.1	A0A498MEK4	0	25.2518
RXN18394.1	A0A498MG97	29.3261	27.5387
RXN18408.1	A0A498MBC1	22.7004	26.4857
RXN19723.1	A0A498MIW9	23.3883	25.6462
RXN19725.1	A0A498MRT9	21.0166	26.8126
RXN20055.1	A0A498MTB9	0	23.3417
RXN20734.1	A0A498MN03	25.9981	25.3198
RXN20819.1	A0A498MHP4	23.8093	26.866
RXN20835.1	A0A498MW42	26.405	0
RXN20955.1	A0A498MWD3	21.6798	20.5771
RXN21077.1	A0A498MWA8	24.0629	27.8156
RXN21329.1	A0A498MJ13	28.9559	27.5118
RXN21337.1	A0A498MXE0	22.9494	0
RXN21391.1	A0A498MJY7	21.917	25.6771
RXN21542.1	A0A498MPI0	23.9465	26.1307
RXN21545.1	A0A498MY16	0	27.6361
RXN21628.1	A0A498MJS7	25.5145	27.0948
RXN22120.1	A0A498LGP3	0	25.1813
RXN22214.1	A0A498MS62	25.9921	27.3049
RXN22687.1	A0A498N1M6	0	22.9191
RXN22942.1	A0A498LG84	0	23.1938
RXN23231.1	A0A498MR33	29.1291	33.3531
RXN23509.1	A0A498MPP0	25.3056	0
RXN23655.1	A0A498N471	23.8238	26.6912
RXN24481.1	A0A498MVF3	29.7051	25.7067
RXN24732.1	A0A498MZ10	27.0434	0
RXN24768.1	A0A498MSX6	22.9821	0
RXN24777.1	A0A498N834	22.4534	20.949
RXN24921.1	A0A498MWS4	0	27.5527
RXN25683.1	A0A498N0K6	0	23.5567
RXN26410.1	A0A498N001	26.1335	28.1846
RXN26704.1	A0A498N4V8	27.2707	28.4869
RXN26840.1	A0A498N1A7	26.407	28.0138
RXN26896.1	A0A498N8I6	24.3528	0
RXN27637.1	A0A498NDS9	26.7494	28.5488
RXN28130.1	A0A498N519	0	26.5892
RXN28379.1	A0A498N230	25.8671	0
RXN28495.1	A0A498NE74	24.335	24.9533
RXN28708.1	A0A498N3F6	24.0153	28.9483
RXN28821.1	A0A498N7K0	23.2757	24.8945
RXN28841.1	A0A498N7L4	27.8922	27.0592
RXN28995.1	A0A498NEM1	23.1187	0
RXN29053.1	A0A498N9Q6	25.8585	25.5736
RXN29099.1	A0A498N3Y5	0	23.1277
RXN29505.1	A0A498NF02	26.8614	28.1344
RXN29629.1	A0A498N5G6	27.8481	25.5325
RXN29769.1	A0A498N5U1	27.9388	26.0393
RXN30384.1	A0A498NDJ7	24.1424	22.9325
RXN30613.1	A0A498NCT8	28.427	27.8474
RXN30760.1	A0A498NFZ5	0	25.2098
RXN30785.1	A0A498NG29	0	28.6268
RXN30794.1	A0A498NGC0	0	26.5776
RXN30834.1	A0A498NGG7	26.7654	25.3996
RXN31077.1	A0A498NH70	0	26.9454
RXN31950.1	A0A498NJ41	28.585	29.2792
RXN31951.1	A0A498NJC2	26.5846	27.2298
RXN32054.1	A0A498NK32	27.6989	28.2749
RXN32147.1	A0A498NKN5	24.8686	21.105
RXN32412.1	A0A498NKF0	24.1299	24.571
RXN32553.1	A0A498NKY3	0	27.3502
RXN32975.1	A0A498LQB7	24.1398	26.6796
RXN33090.1	A0A498NM74	0	22.0057
RXN33166.1	A0A498L301	26.1811	24.1431
RXN33643.1	A0A498LNW0	0	27.7411
RXN33696.1	A0A498NPK0	23.7813	26.6007
RXN34113.1	A0A498NQC6	0	27.5178
RXN34553.1	A0A498NRK2	26.0375	23.6527
RXN34674.1	A0A498NT28	22.7885	25.7128
RXN34906.1	A0A498NTC1	0	24.3269
RXN35142.1	A0A498NSN9	28.1023	28.6501
RXN35246.1	A0A498NU90	20.9507	25.4959
RXN35281.1	A0A498NTQ4	29.1892	29.6846
RXN37201.1	A0A498NZ72	24.6055	0
RXN38721.1	A0A498P3E8	25.3575	25.0645
RXN39453.1	A0A498P5C9	22.4759	28.2518
RXN02673.1	A0A498L5H4	29.1145	32.5091
RXN03632.1	A0A498L5J2	23.1069	27.7139
RXN03759.1	A0A498LIL1	0	26.617
RXN03844.1	A0A498LBG8	29.0485	29.6156
RXN03890.1	A0A498L6A7	25.3721	29.5565
RXN03972.1	A0A498N211	26.7597	26.2225
RXN03991.1	A0A498L6I4	24.4499	22.0433
RXN04101.1	A0A498L6U4	0	24.4163
RXN04732.1	A0A498L925	0	28.5037
RXN04990.1	A0A498N3I9	22.8941	25.4316
RXN05040.1	A0A498LS50	24.1405	0
RXN05209.1	A0A498LAF5	0	26.6329
RXN05645.1	A0A498LJJ3	22.448	25.9141
RXN05670.1	A0A498LBP2	26.2318	30.3216
RXN05685.1	A0A498LVL4	24.3398	28.3178
RXN07019.1	A0A498LFI9	28.3022	26.5058
RXN07069.1	A0A498LFN2	0	23.5037
RXN07096.1	A0A498LJ72	24.2752	24.7469
RXN07270.1	A0A498LGG2	26.6069	25.3306
RXN07383.1	A0A498LIJ7	0	24.0518
RXN07401.1	A0A498LGY1	26.0666	27.3496
RXN07650.1	A0A498LHJ3	21.8236	27.7263
RXN07651.1	A0A498LHU8	22.2685	27.2278
RXN07659.1	A0A498LH75	21.9519	26.3575
RXN08075.1	A0A498ME94	24.9763	25.5816
RXN08278.1	A0A498LIX0	24.0629	26.36
RXN08305.1	A0A498LSF8	22.5387	29.0012
RXN08697.1	A0A498ME64	0	26.0994
RXN08804.1	A0A498LQ23	23.5245	27.2981
RXN08836.1	A0A498LP40	29.9043	33.2326
RXN08958.1	A0A498LKL7	25.3963	24.0266
RXN09097.1	A0A498LUM0	27.3974	28.3292
RXN09417.1	A0A498LVS8	0	19.7808
RXN09576.1	H9C4W4	28.1662	0
RXN09580.1	H9C4W8	22.3874	0
RXN09636.1	A0A498LRC0	0	27.2902
RXN09641.1	A0A498LNM5	25.4105	28.3514
RXN09664.1	A0A498LSG3	23.3685	0
RXN09692.1	A0A498LPJ1	25.0386	27.735
RXN10062.1	A0A498LQP8	0	26.9782
RXN10206.1	A0A498LSX2	21.8875	25.9511
RXN10213.1	A0A498LRA4	23.3974	28.1841
RXN10269.1	A0A498LPF0	0	27.1919
RXN10342.1	A0A498LRK8	0	26.4832
RXN10362.1	A0A498LRM7	24.4994	26.0349
RXN10451.1	A0A498LQS7	0	26.0508
RXN11196.1	A0A498LGY5	25.8687	27.0282
RXN11307.1	A0A498M1S6	27.5651	28.6366
RXN11329.1	A0A498LSD3	28.0726	22.9999
RXN11378.1	A0A498LSE6	25.9426	27.1604
RXN11515.1	A0A498M1G8	26.3896	28.8409
RXN11541.1	A0A498LTN4	0	30.3861
RXN11708.1	A0A498LTB6	0	27.2884
RXN11760.1	A0A498LUF5	26.995	30.3585
RXN12290.1	A0A498LVU1	24.8331	0
RXN12612.1	A0A498LZ02	28.1378	29.6872
RXN12631.1	A0A498LWN1	0	27.9065
RXN12776.1	A0A498LZY1	24.7038	0
RXN13137.1	A0A498M7H1	22.7839	25.3846
RXN13899.1	A0A498LZA7	0	25.3885
RXN13988.1	A0A498LZI5	0	27.5523
RXN14121.1	A0A498L642	29.5955	29.8421
RXN14738.1	A0A498M1Q7	0	26.0639
RXN14897.1	A0A498MCU4	23.8664	0
RXN14902.1	A0A498M6I7	21.2856	25.7213
RXN15132.1	A0A498M763	25.2246	26.1358
RXN15355.1	A0A498MCX3	0	25.8687
RXN15553.1	A0A498M6L7	27.2829	29.113
RXN15567.1	A0A498MEW8	0	26.2823
RXN15665.1	A0A498MDW3	26.5756	26.416
RXN16028.1	A0A498M566	22.2404	23.3929
[truncated: 934 more rows]

## Sheet: Input_Shared_Gonad_PA_1511
Accession	Mix NCBI up	Protein	Female gonad	Male gonad
RXN02622.1	A0A498L2G9	Adp-Ribosylation Factor 1	27.1656	28.2069
RXN02438.1	A0A498L2U2	Sid1 Transmembrane Family Member 2 Isoform X1	23.1158	26.2428
RXN02760.1	A0A498L2V9	T-Complex 1 Subunit Alpha	29.9422	29.6913
RXN33166.1	A0A498L301	Serine Threonine- Phosphatase Alpha-2 Isoform-Like Protein	26.1811	24.1431
RXN02790.1	A0A498L311	Translationally-Controlled Tumor-Like Protein	28.3857	29.2169
RXN02801.1	A0A498L318	Charged Multivesicular Body 2B	23.8599	27.0821
RXN02812.1	A0A498L319	Pseudouridine-5 -Phosphatase	24.4872	28.5695
RXN02839.1	A0A498L3R2	Propionyl- Carboxylase Alpha Mitochondrial	30.5907	27.3778
RXN02949.1	A0A498L3Z8	Presequence Mitochondrial	26.7023	27.259
RXN34733.1	A0A498L4B6	Adp-Ribosylation Factor Gtpase-Activating 3	24.2457	27.0119
RXN03089.1	A0A498L4D0	Dnaj -Like Protein	23.5075	25.481
RXN03250.1	A0A498L4F1	Glyceraldehyde-3-Phosphate Testis-Specific	27.9629	31.7023
RXN03138.1	A0A498L4V5	Rna Polymerase Ii Subunit A C-Terminal Domain Phosphatase Ssu72	23.5137	27.8921
RXN03430.1	A0A498L4Z1	Coatomer Subunit Beta	27.127	30.302
RXN03319.1	A0A498L508	Nicalin-1-Like Isoform X3	27.594	27.0452
RXN02673.1	A0A498L5H4	Transketolase-Like Protein	29.1145	32.5091
RXN03632.1	A0A498L5J2	Puromycin-Sensitive Aminopeptidase	23.1069	27.7139
RXN03662.1	A0A498L5N4	Abhd14B	21.6588	26.1637
RXN28291.1	A0A498L5W0	Eukaryotic Translation Initiation Factor 3 Subunit A Isoform X1	29.8069	29.2508
RXN16135.1	A0A498L5W2	Serine Cytosolic	29.4069	32.1848
RXN08041.1	A0A498L5Y4	Elongation Factor Mitochondrial	25.1248	26.5477
RXN14121.1	A0A498L642	Nucleosome Assembly 1-Like 4 Isoform X1	29.5955	29.8421
RXN02326.1	A0A498L675	Histone H1-Like Protein	27.1569	27.9849
RXN03890.1	A0A498L6A7	Glyoxalase Domain-Containing 4	25.3721	29.5565
RXN03789.1	A0A498L6B4	Eukaryotic Translation Initiation Factor 4E Transporter Isoform	30.386	35.0933
RXN03991.1	A0A498L6I4	Polypeptide N-Acetylgalactosaminyltransferase 3	24.4499	22.0433
RXN03902.1	A0A498L6K6	14-3-3 Gamma-B	23.0822	25.5468
RXN03073.1	A0A498L6L1	40S Ribosomal S12	29.4909	28.9264
RXN08029.1	A0A498L6M3	Type I Cytoskeletal 18-Like Protein	29.9552	32.7899
RXN19604.1	A0A498L6M4	39S Ribosomal Mitochondrial-Like Protein	24.0216	24.0629
RXN03788.1	A0A498L6Q9	Ruvb-Like 1	28.6417	29.6834
RXN03848.1	A0A498L6W4	Ras And Ef-Hand Domain-Containing-Like Protein	25.6111	28.2122
RXN04141.1	A0A498L6Y8	Retinal Dehydrogenase 2	27.0826	28.6195
RXN04151.1	A0A498L6Z5	Methylmalonyl- Mitochondrial-Like Isoform X1	24.2668	28.208
RXN02596.1	A0A498L707	60S Ribosomal L27	31.1048	27.078
RXN04152.1	A0A498L7C3	Sorbitol Dehydrogenase-Like Protein	24.9385	27.6952
RXN02394.1	A0A498L7I0	Type I Cytoskeletal 18	33.3503	35.3109
RXN02424.1	A0A498L7K2	Folate Receptor Alpha-Like Protein	21.9099	26.2971
RXN04299.1	A0A498L7Q6	Zygote Arrest 1-Like Protein	30.6791	30.3525
RXN27591.1	A0A498L7R5	Malate Mitochondrial	32.693	31.7687
RXN04400.1	A0A498L7T5	Eukaryotic Translation Initiation Factor 3 Subunit G	30.1947	27.655
RXN04540.1	A0A498L885	Rho Gtpase-Activating 17 Isoform X1	21.9492	25.9509
RXN03056.1	A0A498L892	Lsm14 -Like Protein	27.2994	30.9887
RXN02684.1	A0A498L8B5	60S Ribosomal L10	30.8097	28.9588
RXN25506.1	A0A498L8K0	Adp Atp Translocase 1	24.8493	27.6804
RXN04680.1	A0A498L8L8	Serine Threonine- Phosphatase Cpped1	21.8181	23.374
RXN04619.1	A0A498L8Q0	Phosphatidylinositol 3,4,5-Trisphosphate 5-Phosphatase 1-Like Pr	22.6753	32.3467
RXN04669.1	A0A498L8V2	Aconitate Mitochondrial-Like Protein	30.1635	29.79
RXN13717.1	A0A498L8V5	Peroxiredoxin-4	31.6635	27.2232
RXN25508.1	A0A498L8Y8	Ufm1-Specific Protease 2	21.8002	24.6518
RXN02894.1	A0A498L903	Plakophilin-3-Like Isoform X1	21.5998	28.0883
RXN04840.1	A0A498L907	Ctp Synthase 1	25.3196	29.0629
RXN04678.1	A0A498L965	Sorting Nexin-29	25.2407	25.613
RXN03456.1	A0A498L9A3	Putative Protein C17Orf53-Like Protein	31.9937	29.4852
RXN33180.1	A0A498L9L3	5-Demethoxyubiquinone Mitochondrial-Like Protein	22.1724	24.3147
RXN05091.1	A0A498L9Q3	Nadh Dehydrogenase [Ubiquinone] 1 Alpha Subcomplex Subunit 12	27.9438	19.927
RXN04266.1	A0A498L9R8	Inter-Alpha-Trypsin Inhibitor Heavy Chain H2	22.6061	24.5922
RXN04123.1	A0A498L9S6	Talin-2 Isoform X1	28.6402	30.1259
RXN05028.1	A0A498LA25	Glia Maturation Factor Beta	24.3073	27.2521
RXN05038.1	A0A498LA35	Glycogen Liver Form	25.005	31.8012
RXN02707.1	A0A498LA40	Nsfl1 Cofactor P47-Like Protein	27.9567	29.2877
RXN34636.1	A0A498LA53	Type I Cytoskeletal 13-Like Protein	24.9964	28.5026
RXN34610.1	A0A498LA61	Gamma-Enolase	23.0146	26.5912
RXN05281.1	A0A498LAB9	Peptidyl-Prolyl Cis-Trans Isomerase B	31.0859	29.5131
RXN05280.1	A0A498LAE0	Dep Domain-Containing 7-Like Protein	23.6319	24.2391
RXN03876.1	A0A498LAH2	Dihydrolipoyl Mitochondrial	31.0209	28.5189
RXN05188.1	A0A498LAI7	Polyadenylate-Binding 1	31.9236	32.2825
RXN16129.1	A0A498LAK0	Fascin	25.4173	31.7996
RXN05288.1	A0A498LAT7	Wd Repeat-Containing 61	25.8117	26.8245
RXN02485.1	A0A498LAX0	Poly(Rc)-Binding 2	26.6036	31.0369
RXN03624.1	A0A498LAX2	40S Ribosomal S5	30.8629	28.6039
RXN05372.1	A0A498LAX4	Citrate Mitochondrial	26.5477	27.9192
RXN05358.1	A0A498LB05	Isocitrate Dehydrogenase [Nadp] Mitochondrial	31.7699	30.033
RXN05521.1	A0A498LB15	Nad-Dependent Deacylase Sirtuin- Mitochondrial Isoform X1	23.2061	21.7104
RXN28542.1	A0A498LB17	Tropomyosin Alpha-3 Chain Isoform X6	29.2839	31.4818
RXN05428.1	A0A498LB57	Pip5K1A And Psmd4	28.0646	26.7879
RXN05512.1	A0A498LBB3	60S Ribosomal L23	28.4265	29.2901
RXN22363.1	A0A498LBD4	Rcc2	27.7704	27.5543
RXN11205.1	A0A498LBG3	Sh3 Domain-Binding 1-Like Protein	25.5024	25.3687
RXN03844.1	A0A498LBG8	Arginine-Glutamic Acid Dipeptide Repeats -Like Isoform X1	29.0485	29.6156
RXN05582.1	A0A498LBI5	Cytoplasmic Dynein 1 Heavy Chain 1 Isoform X2	27.7812	29.4169
RXN26041.1	A0A498LBK9	3-Hydroxyacyl- Dehydrogenase Type-2	26.9417	25.4563
RXN05711.1	A0A498LBM3	40S Ribosomal S8	32.7275	30.4925
RXN05670.1	A0A498LBP2	Valine--Trna Ligase-Like Isoform X1	26.2318	30.3216
RXN03954.1	A0A498LBS5	Atp Synthase Subunit Mitochondrial-Like Protein	28.8717	29.3687
RXN05730.1	A0A498LBT2	Bucky Ball	27.5886	29.9005
RXN05702.1	A0A498LBV9	Solute Carrier Family Facilitated Glucose Transporter Member 2	25.2692	27.9354
RXN05708.1	A0A498LBY9	Medium-Chain Specific Acyl- Mitochondrial	31.5953	29.6551
RXN04456.1	A0A498LC14	Signal Peptidase Complex Subunit 3	27.4382	25.8166
RXN02905.1	A0A498LC60	2-Oxoisovalerate Dehydrogenase Subunit Mitochondrial	29.9751	26.2155
RXN26388.1	A0A498LC94	Ubiquitin-Conjugating Enzyme E2 L3	25.805	26.6759
RXN05979.1	A0A498LCC7	Catenin Beta-1 Isoform X2	21.7482	29.3786
RXN06009.1	A0A498LCF8	Hermansky-Pudlak Syndrome 4 -Like Isoform X1	25.1615	22.4925
RXN04636.1	A0A498LCI4	Vigilin Isoform X2	27.5781	27.5417
RXN05093.1	A0A498LCJ8	Laminin Subunit Beta-1-Like Protein	21.7453	25.7355
RXN03657.1	A0A498LD02	40S Ribosomal S10	29.4868	27.5212
RXN05283.1	A0A498LD14	Sorting Nexin-1-Like Protein	25.3907	28.6422
RXN06148.1	A0A498LD23	Ribosome Production Factor 2-Like Protein	25.0354	20.9735
RXN06102.1	A0A498LD43	Heat Shock 70 Kda 14	24.7762	28.1598
RXN06201.1	A0A498LD68	Atypical Kinase Mitochondrial	26.9492	25.0698
RXN04464.1	A0A498LD75	High Mobility Group B2-Like Protein	25.6527	30.5558
RXN04474.1	A0A498LD80	Von Willebrand Factor A Domain-Containing 7-Like Protein	24.6353	28.2963
RXN03747.1	A0A498LDA5	Type Ii Cytoskeletal 8	26.6121	30.2542
RXN06152.1	A0A498LDA6	Putative Arginine--Trna Mitochondrial	22.7615	21.6362
RXN06241.1	A0A498LDA8	Vacuolar Sorting-Associated Vta1-Like Protein	26.0477	27.19
RXN05393.1	A0A498LDC1	Nadh Dehydrogenase [Ubiquinone] Iron-Sulfur 5	27.7548	22.7959
RXN16771.1	A0A498LDC6	Disulfide-Isomerase A6	28.8612	26.5389
RXN06260.1	A0A498LDE8	Disulfide-Isomerase A6-Like Protein	30.9518	27.4054
RXN16166.1	A0A498LDS4	Flightless-1-Like Protein	23.7157	26.9448
RXN06332.1	A0A498LDT5	Emilin-1-Like Protein	23.2149	29.1923
RXN05583.1	A0A498LDT8	Cytoplasmic Dynein 1 Heavy Chain 1	27.1348	27.1605
RXN16919.1	A0A498LDV6	Nucleo Tpr-Like Isoform X1	20.5424	25.6098
RXN25503.1	A0A498LDW3	Long-Chain-Fatty-Acid-- Ligase 1 Isoform X1	25.0941	25.7348
RXN15961.1	A0A498LDZ5	Gtp-Binding Sar1B	27.0363	28.21
RXN20479.1	A0A498LE46	Tropomyosin Alpha-1 Chain Isoform X2	23.6374	23.9527
RXN05743.1	A0A498LE76	Carbonic Anhydrase-Like Protein	25.1234	29.3694
RXN04097.1	A0A498LEC0	Eukaryotic Translation Initiation Factor 2 Subunit 3	28.7151	29.9456
RXN06610.1	A0A498LEH5	Fibrinogen Gamma Chain-Like Protein	26.0878	29.4848
RXN13972.1	A0A498LEV5	Aldehyde Dehydrogenase Family 9 Member A1-B-Like Protein	24.6699	24.9859
RXN06033.1	A0A498LEZ0	Cytotoxin 7-Like Protein	24.501	24.6872
RXN27158.1	A0A498LF02	Superoxide Dismutase [Cu-Zn]	26.226	32.4487
RXN06878.1	A0A498LF16	Vacuolar Sorting-Associated 51-Like Protein	20.7585	23.9729
RXN04327.1	A0A498LF21	Lanc-Like Protein 2	23.1931	23.6737
RXN06153.1	A0A498LFA4	Heterogeneous Nuclear Ribonucleo Q Isoform X1	25.5466	28.9943
RXN04105.1	A0A498LFD6	Disulfide-Isomerase A4-Like Protein	30.3	32.3784
RXN07028.1	A0A498LFE6	Glycerol-3-Phosphate Dehydrogenase 1	23.1085	23.9494
RXN07058.1	A0A498LFH6	Transcriptional Activator Pur-Beta	26.6691	25.6607
RXN30783.1	A0A498LFI5	Stromal Cell-Derived Factor 2 1	25.1046	23.0963
RXN07019.1	A0A498LFI9	Eukaryotic Translation Initiation Factor 3 Subunit E-A	28.3022	26.5058
RXN16791.1	A0A498LFM1	Atp-Dependent Rna Helicase Ddx1	30.6817	35.201
RXN07011.1	A0A498LFT2	Extracellular Calcium-Sensing Receptor	27.9856	32.8906
RXN07040.1	A0A498LFT5	Glutaredoxin-3	36.9955	29.7816
RXN07188.1	A0A498LFV9	Pre-Mrna-Processing Factor 40 -Like Protein	21.8555	25.6935
RXN30782.1	A0A498LFW3	Mitogen-Activated Kinase 1	24.3804	24.1492
RXN05906.1	A0A498LFY9	Carboxypeptidase Q	25.7724	26.5364
RXN05916.1	A0A498LFZ8	Pip5K1A And Psmd4	28.5072	25.7805
RXN05966.1	A0A498LG34	Ccr4-Not Transcription Complex Subunit 10 Isoform X1	21.8257	29.1205
RXN07318.1	A0A498LG69	Glycogen Muscle Form	24.9402	27.619
RXN05664.1	A0A498LG70	Cop9 Signalosome Complex Subunit 7A-Like Protein	25.589	27.7661
RXN06066.1	A0A498LGC7	Reticulon-3 Isoform X1	27.0159	26.3476
RXN07270.1	A0A498LGG2	Methionine Adenosyltransferase 2 Subunit Beta Isoform X2	26.6069	25.3306
RXN04525.1	A0A498LGI9	Nad-Dependent Deacylase Sirtuin- Mitochondrial	27.5249	26.4878
RXN07042.1	A0A498LGJ5	Serine Threonine- Phosphatase 2A 55 Kda Regulatory Subunit B Del	24.9038	26.5542
RXN07311.1	A0A498LGN8	Transcriptional Activator Pur-Alpha-Like Protein	24.3666	22.9065
RXN23290.1	A0A498LGP1	Poly [Adp-Ribose] Polymerase 1	23.378	31.0302
RXN31646.1	A0A498LGP6	Nucleolar Gtp-Binding 2	29.2129	21.7958
RXN07400.1	A0A498LGV3	Septin-6 Isoform X3	24.9548	28.3029
RXN07401.1	A0A498LGY1	Pctp	26.0666	27.3496
RXN16794.1	A0A498LGY3	Enhancer Of Rudimentary-Like Protein	23.8489	25.0694
RXN11196.1	A0A498LGY5	X-Ray Repair Cross-Complementing 6	25.8687	27.0282
RXN07618.1	A0A498LH19	Pre-Rrna-Processing Tsr1 -Like Protein	20.8806	23.1528
RXN07628.1	A0A498LH28	Coiled-Coil Domain-Containing 9-Like Protein	23.1019	28.2397
RXN05027.1	A0A498LH57	Galectin-3-Like Protein	26.7012	25.9058
RXN07649.1	A0A498LH59	Pre-Mrna-Processing-Splicing Factor 8	26.492	27.6538
RXN27152.1	A0A498LH60	T-Complex 1 Subunit Theta Isoform X2	30.6683	30.7114
RXN07659.1	A0A498LH75	Bleomycin Hydrolase	21.9519	26.3575
RXN06893.1	A0A498LH90	Peptidyl-Trna Hydrolase Mitochondrial-Like Protein	21.7118	21.7561
RXN07292.1	A0A498LH99	Sorting Nexin-12 Isoform X2	23.0621	28.2715
RXN07640.1	A0A498LHI3	Dehydrogenase Reductase Sdr Family Member 13-Like Protein	24.5669	30.4855
RXN06496.1	A0A498LHI8	Aspartate Cytoplasmic	25.7274	28.3892
RXN07650.1	A0A498LHJ3	Unconventional Myosin-Ic Isoform X1	21.8236	27.7263
RXN07601.1	A0A498LHP7	14-3-3 Epsilon	24.4016	30.4157
RXN07621.1	A0A498LHR7	Replication A 70 Kda Dna-Binding Subunit	25.8318	29.9036
RXN07730.1	A0A498LHR8	Bridging Integrator 2-Like Protein	21.9416	25.0558
RXN07412.1	A0A498LHT6	Adp Atp Translocase 2	33.8379	31.149
RXN07651.1	A0A498LHU8	Unconventional Myosin-Ic-Like Isoform X1	22.2685	27.2278
RXN07909.1	A0A498LHV0	Spectrin Beta Chain, Non-Erythrocytic 1-Like	21.6178	25.0585
RXN07949.1	A0A498LHZ4	Delta C Isoform X2	26.5611	24.0055
RXN04270.1	A0A498LI09	Atp Synthase Subunit Mitochondrial-Like Isoform X1	32.2249	28.4828
RXN07968.1	A0A498LI11	Heat Shock Cognate 71 Kda	24.268	31.686
RXN06676.1	A0A498LI33	Rho Gdp-Dissociation Inhibitor 1	28.5544	27.5337
RXN16851.1	A0A498LI49	Tudor Domain-Containing 6-Like Isoform X1	28.0213	32.4423
RXN23460.1	A0A498LI98	Spectrin Beta Non-Erythrocytic 1-Like Isoform X1	25.0391	29.3107
RXN07283.1	A0A498LIA0	Ribonucleoside-Diphosphate Reductase Large Subunit	28.3142	29.709
RXN07333.1	A0A498LIF2	Trifunctional Enzyme Subunit Mitochondrial-Like Protein	30.2699	29.7114
RXN08129.1	A0A498LIH2	60S Ribosomal L18A	28.9292	27.5996
RXN05295.1	A0A498LII5	Iron-Responsive Element-Binding 2	29.4812	29.3162
RXN06886.1	A0A498LIP3	Eh Domain-Containing 1-Like Protein	26.9043	26.8715
RXN26081.1	A0A498LIT6	Adenylate Kinase Mitochondrial Isoform X1	27.752	28.0846
RXN05587.1	A0A498LIU8	Nuclear Export Mediator Factor Nemf	25.6861	27.9926
RXN08278.1	A0A498LIX0	Von Willebrand Factor A Domain-Containing 1-Like Protein	24.0629	26.36
RXN05667.1	A0A498LJ30	Flotillin-1-Like Protein	25.0375	25.9442
RXN33773.1	A0A498LJ32	Double-Strand Break Repair Mre11A	21.1775	23.2112
RXN07533.1	A0A498LJ54	Atp-Binding Cassette Sub-Family A Member 3	25.5438	27.0923
RXN07872.1	A0A498LJ59	Tudor Domain-Containing 3-Like Protein	21.154	26.9497
RXN07096.1	A0A498LJ72	Nadh Dehydrogenase [Ubiquinone] 1 Beta Subcomplex Subunit 3-Like	24.2752	24.7469
RXN07126.1	A0A498LJ97	Heterogeneous Nuclear Ribonucleo A3	23.8792	23.2938
RXN08459.1	A0A498LJB6	Beta-Enolase	31.1818	31.8822
RXN05595.1	A0A498LJD8	Cytoplasmic Dynein 1 Heavy Chain 1	29.6921	30.5278
RXN21644.1	A0A498LJH4	Leucine-Rich Repeat And Coiled-Coil Domain-Containing 1-Like Pro	24.4702	22.4269
RXN05645.1	A0A498LJJ3	Adp-Ribosylation Factor 8A	22.448	25.9141
RXN05705.1	A0A498LJP8	Polypyrimidine Tract-Binding 1 Isoform X2	23.7107	30.3182
RXN08470.1	A0A498LJQ3	Proteasome Subunit Beta Type-6	29.5008	29.4173
RXN06894.1	A0A498LJQ6	Clathrin Heavy Chain 1	29.2458	28.3375
RXN12910.1	A0A498LJR2	Calpastatin-Like Isoform X9	23.3634	27.2645
RXN08480.1	A0A498LJR7	F-Box Lrr-Repeat 5	22.9713	22.2447
RXN05867.1	A0A498LJS0	Dachshund -Like Protein	24.7881	30.6606
RXN12892.1	A0A498LJT3	Ergic-53	27.9955	27.1922
RXN05755.1	A0A498LJU3	60S Ribosomal L7	32.606	29.848
RXN08570.1	A0A498LK15	T-Complex 1 Subunit Epsilon	30.6583	29.839
RXN08660.1	A0A498LKB6	Proteasome Subunit Beta Type-7-Like Protein	27.9347	28.3869
RXN08839.1	A0A498LKD0	Ero1 Alpha	25.9547	26.5926
RXN07496.1	A0A498LKF3	Fras1-Related Extracellular Matrix 1-Like Protein	24.7112	26.2471
RXN07536.1	A0A498LKJ5	Nuclear Receptor-Interacting 1-Like Protein	24.6995	25.2007
RXN08958.1	A0A498LKL7	Nadh Dehydrogenase [Ubiquinone] 1 Beta Subcomplex Subunit Mitoch	25.3963	24.0266
RXN07254.1	A0A498LKM6	Bifunctional Heparan Sulfate N-Deacetylase N-Sulfotransferase 1-	31.8851	29.34
RXN08402.1	A0A498LKN4	Lamin-L(Iii)-Like Isoform X1	24.623	21.5316
RXN07264.1	A0A498LKN7	Monooxygenase P33Monox Isoform X1	21.2092	26.6013
RXN06257.1	A0A498LKV8	Manganese Superoxide Dismutase	29.4854	29.4478
RXN16785.1	A0A498LKX7	Sorting Nexin-3	23.7001	24.3239
RXN07394.1	A0A498LL15	Lysosome-Associated Membrane Glyco 2-Like Isoform X1	26.9457	24.6914
RXN08980.1	A0A498LL74	Disks Large -Like Protein	26.7151	28.3317
RXN08771.1	A0A498LL89	Mitotic Checkpoint Bub3 Isoform X1	22.7334	24.1802
RXN09249.1	A0A498LLG8	Adhesion G -Coupled Receptor L4-Like Protein	35.7025	31.8484
RXN09288.1	A0A498LLJ4	Fructose-Bisphosphate Aldolase B	24.7992	29.3578
RXN09130.1	A0A498LLM0	Aminoacyl Trna Synthase Complex-Interacting Multifunctional 1	29.9296	29.9177
RXN08971.1	A0A498LLS1	Endoribonuclease Dicer	20.538	25.161
RXN07654.1	A0A498LLS3	Phosphatidylinositol Transfer Alpha Isoform-Like Protein	29.1304	29.9973
RXN07996.1	A0A498LLS5	Omega-Amidase Nit2	23.5031	24.2483
RXN08503.1	A0A498LLS6	Eukaryotic Translation Initiation Factor 2 Subunit 3	25.9104	27.3494
RXN08991.1	A0A498LLT9	Ubiquitin Fusion Degradation 1-Like Protein	28.3716	26.5394
RXN13636.1	A0A498LLU7	Growth Hormone-Inducible Transmembrane	22.6738	20.563
RXN08802.1	A0A498LLW6	Atm Interactor-Like Protein	28.3947	28.7396
RXN09101.1	A0A498LM50	Peroxiredoxin-1-Like Protein	31.8149	33.5758
RXN08942.1	A0A498LM82	Peptidyl-Prolyl Cis-Trans Isomerase A-Like Protein	27.1543	28.3332
RXN08773.1	A0A498LMG7	Short Branched Chain Specific Acyl- Mitochondrial	29.1711	28.4442
RXN39595.1	A0A498LMH4	Ras-Related Rab-1A	24.6118	30.3962
RXN29711.1	A0A498LMI2	Thymocyte Nuclear 1	23.2026	22.7007
RXN09589.1	A0A498LMI9	Supervillin-Like Isoform X1	21.1067	22.9304
RXN23140.1	A0A498LMP5	Phosphatidylinositol Transfer Alpha Isoform	25.1871	23.887
RXN09331.1	A0A498LMQ3	Enolase Isoform X1	25.3338	31.3007
RXN09718.1	A0A498LMR9	Ectonucleoside Triphosphate Diphosphohydrolase 1-Like Protein	21.3069	24.8068
RXN06877.1	A0A498LMU5	Eh Domain-Binding 1 1 Isoform X7	23.1583	25.8466
RXN06897.1	A0A498LMW5	Sorting And Assembly Machinery Component 50 -Like Protein	26.5034	25.1183
RXN09719.1	A0A498LMW6	Delta-1-Pyrroline-5-Carboxylate Synthase-Like Isoform X2	28.0583	27.7101
RXN06705.1	A0A498LMW8	Disulfide-Isomerase A3-Like Protein	24.5264	24.2952
RXN09421.1	A0A498LMZ1	Transmembrane 50A	22.1028	26.7602
RXN08436.1	A0A498LMZ7	High Mobility Group B2-Like Protein	21.7763	28.1176
RXN12671.1	A0A498LN13	Glutamine--Fructose-6-Phosphate Aminotransferase [Isomerizing] 1	25.8326	26.8745
RXN08466.1	A0A498LN29	Zonadhesin-Like Isoform X1	32.8381	22.9846
RXN27416.1	A0A498LN48	Vesicle-Associated Membrane -Associated B-Like Isoform X1	27.5036	27.4565
RXN27425.1	A0A498LN53	Cytochrome Heme Mitochondrial-Like Protein	28.9344	24.5232
RXN08496.1	A0A498LN61	Ras Gtpase-Activating -Binding 2-Like Protein	29.1285	28.7119
RXN09043.1	A0A498LN73	Phosphoglycerate Mutase 1	29.7624	28.3494
RXN08234.1	A0A498LN85	Transmembrane Protein 214	26.2515	26.1151
RXN09600.1	A0A498LN88	F-Box Only 11 Isoform X2	24.9453	28.6884
RXN09700.1	A0A498LNI8	Attractin 1	27.438	31.4303
RXN09641.1	A0A498LNM5	Charged Multivesicular Body 2A	25.4105	28.3514
RXN11298.1	A0A498LNQ8	Chromosomal D1-Like Protein	22.597	27.8794
RXN09283.1	A0A498LNT9	Hypothetical Protein	23.3126	23.3536
RXN09303.1	A0A498LNV6	Fragile X Mental Retardation 1 Isoform X1	26.4938	26.1426
RXN10118.1	A0A498LNV7	Fatty Acid Synthase	22.4654	25.5558
RXN14831.1	A0A498LP08	3-Ketoacyl- Peroxisomal	25.4876	24.5227
RXN08524.1	A0A498LP25	Ef-Hand Domain-Containing D2	25.0148	23.8908
RXN08836.1	A0A498LP40	Upf0568 Protein C14Orf166-Like	29.9043	33.2326
RXN09403.1	A0A498LP47	Cancer-Related Nucleoside-Triphosphatase	21.5152	28.4533
RXN09413.1	A0A498LP57	Lactoylglutathione Lyase	24.2764	26.4899
RXN07145.1	A0A498LP67	Cytoplasmic Dynein 1 Intermediate Chain 2 Isoform X4	26.0191	28.2591
RXN09453.1	A0A498LP98	Dna Mismatch Repair Msh6	27.1362	27.2695
RXN09612.1	A0A498LPA5	Phosphatase 1B-Like Isoform X1	23.0677	26.1087
RXN10030.1	A0A498LPD4	Atp-Dependent Rna Helicase Ddx19A	25.8382	30.9817
RXN10328.1	A0A498LPH1	60S Ribosomal L7A	33.4024	30.7154
RXN10080.1	A0A498LPI1	Coatomer Subunit Alpha	29.2421	30.8826
RXN09692.1	A0A498LPJ1	Chromosomal D1-Like Protein	25.0386	27.735
RXN07275.1	A0A498LPJ7	Argininosuccinate Lyase	22.1642	24.7899
RXN10329.1	A0A498LPK2	Surfeit Locus 1	25.8091	24.696
RXN09712.1	A0A498LPK8	Nhl Repeat-Containing 2	21.7423	26.8807
RXN07295.1	A0A498LPL2	H Aca Ribonucleo Complex Subunit 2	25.9482	31.2892
RXN10339.1	A0A498LPL3	60S Ribosomal L12 Isoform X1	30.295	29.3992
RXN07315.1	A0A498LPM6	Ubiquitin Thioesterase Otub1-Like Protein	26.6759	27.2521
RXN10369.1	A0A498LPN6	Udp-N-Acetylhexosamine Pyrophosphorylase 1	22.9027	27.3194
RXN07517.1	A0A498LPR4	60S Ribosomal L34	29.3636	26.2464
RXN09106.1	A0A498LPS4	Actin-Related 2	26.7258	26.1212
RXN10458.1	A0A498LPV0	Bifunctional Glutamate Proline--Trna Ligase Isoform X3	29.994	30.1325
RXN27497.1	A0A498LPZ0	Creatine Kinase M-Type-Like Protein	22.7474	27.9761
RXN08804.1	A0A498LQ23	Dna Damage-Binding 1	23.5245	27.2981
RXN09216.1	A0A498LQ30	Catechol O-Methyltransferase Domain-Containing 1 Isoform X2	22.5382	25.1348
RXN35386.1	A0A498LQ71	Thimet Oligopeptidase	27.9738	29.745
RXN10578.1	A0A498LQ72	Ribosome-Binding 1-Like Isoform X1	26.8528	25.6744
RXN32975.1	A0A498LQB7	Alpha-Actinin-1 Isoform X5	24.1398	26.6796
RXN02638.1	A0A498LQD7	Eukaryotic Translation Initiation Factor 4 Gamma 3 Isoform X4	20.726	28.9782
RXN08944.1	A0A498LQF9	Dna-Directed Rna Polymerase Iii Subunit Rpc1 Isoform X1	21.0478	26.2094
RXN10649.1	A0A498LQH0	Kinetochore-Associated 1 Isoform X1	22.7667	25.0829
RXN09923.1	A0A498LQI3	Gmp Synthase [Glutamine-Hydrolyzing]	22.0918	27.2718
RXN08974.1	A0A498LQI4	Monocarboxylate Transporter 9-Like Protein	25.7657	28.1304
RXN10688.1	A0A498LQI5	Carboxypeptidase D-Like Protein	25.387	28.1459
RXN07747.1	A0A498LQJ1	Geranylgeranyl Transferase Type-2 Subunit Alpha	24.3447	25.1352
RXN10698.1	A0A498LQJ5	Clustered Mitochondria-Like Protein	24.5784	22.7016
RXN14361.1	A0A498LQK2	Membrane-Associated Progesterone Receptor Component 1-Like Prote	24.8266	26.24
RXN08994.1	A0A498LQK4	Septin-2	25.5143	26.8908
RXN10381.1	A0A498LQK9	Ruvb-Like 2	28.5194	30.0762
RXN09406.1	A0A498LQL6	Translin-Associated X	25.5521	28.0733
RXN06409.1	A0A498LQQ7	Hypothetical Protein	25.192	26.9667
RXN09054.1	A0A498LQR3	Nuclear Pore Complex Protein Nup133	27.2385	26.589
RXN10441.1	A0A498LQR8	Mitochondrial 2-Oxodicarboxylate Carrier Isoform X1	27.7443	21.7395
RXN09124.1	A0A498LQX9	Cytochrome P450 2U1	30.2631	26.904
RXN10162.1	A0A498LR06	Nuclear Localization 4-Like Protein	26.9146	29.3532
RXN10888.1	A0A498LR17	Nap -Like Protein	27.9372	27.1955
RXN10222.1	A0A498LR76	Putative Atp-Dependent Rna Helicase Ddx6	31.974	37.016
RXN10203.1	A0A498LR94	40S Ribosomal S23	29.0998	28.2072
RXN09616.1	A0A498LR99	Glutamate Mitochondrial	31.1009	32.1896
RXN10213.1	A0A498LRA4	Trypsin-2-Like Protein	23.3974	28.1841
RXN10252.1	A0A498LRA6	40S Ribosomal S19	29.679	29.6906
RXN10661.1	A0A498LRE1	Zinc Finger Protein 346-Like Isoform X1	20.2586	26.3245
RXN29748.1	A0A498LRF7	Fatty Aldehyde Dehydrogenase-Like Protein	22.3866	23.2603
RXN09354.1	A0A498LRI3	Golgi Apparatus 1-Like Isoform X1	25.1892	23.9404
RXN11088.1	A0A498LRL2	Ran Gtpase-Activating 1-Like Isoform X1	26.3657	26.0606
RXN10362.1	A0A498LRM7	Unconventional Myosin-Ih-Like Protein	24.4994	26.0349
RXN10343.1	A0A498LRM8	Serine Threonine- Phosphatase 2A Activator	25.1611	26.3086
RXN10372.1	A0A498LRN4	Endophilin-B2-Like Isoform X5	24.6184	24.569
RXN39545.1	A0A498LRW2	Apolipo A-I	28.7746	33.311
RXN10980.1	A0A498LS35	40S Ribosomal S16	29.7403	29.5495
RXN11239.1	A0A498LS47	Transcription Elongation Factor A 2-Like Protein	23.0958	26.3853
RXN11278.1	A0A498LS48	Dna-Directed Rna Polymerase Ii Subunit Rpb1	22.3154	20.6604
RXN11319.1	A0A498LSC4	Mitochondrial Amidoxime-Reducing Component 1-Like Protein	29.1065	27.0665
RXN11329.1	A0A498LSD3	Ubiquinone Biosynthesis Monooxygenase Mitochondrial Isoform X2	28.0726	22.9999
RXN11378.1	A0A498LSE6	Kinectin-Like Isoform X2	25.9426	27.1604
RXN08305.1	A0A498LSF8	Cysteine--Trna Cytoplasmic Isoform X1	22.5387	29.0012
RXN10046.1	A0A498LSH0	Heterogeneous Nuclear Ribonucleo A1-Like Protein	24.2488	26.9131
RXN09704.1	A0A498LSJ7	Tudor Domain-Containing 1-Like Protein	27.1724	32.2604
RXN09734.1	A0A498LSM2	Serine Arginine-Rich Splicing Factor 2-Like Protein	25.6217	26.9666
RXN29357.1	A0A498LST9	E3 Ubiquitin- Ligase Arih2	23.1445	24.0888
RXN11220.1	A0A498LSW6	Eukaryotic Translation Initiation Factor 4B-Like Isoform X3	21.2351	27.6753
RXN08465.1	A0A498LSX0	Cyst Germination Specific Acidic Repeat	33.7798	26.4506
RXN10206.1	A0A498LSX2	Adp-Ribosylation Factor 4	21.8875	25.9511
RXN10753.1	A0A498LT27	26S Proteasome Non-Atpase Regulatory Subunit 14	28.2525	27.3834
RXN29375.1	A0A498LT46	Glutathione S-Transferase Mu 3-Like Protein	27.9286	31.1708
RXN11668.1	A0A498LT82	Trans-2-Enoyl- Mitochondrial	24.1536	26.0727
RXN10336.1	A0A498LT86	Tubulin Beta-4B Chain	30.6209	32.7626
RXN10044.1	A0A498LTD9	Coatomer Subunit Zeta-1	25.7109	28.7404
RXN11748.1	A0A498LTG0	Myosin Light Polypeptide 6 Isoform X1	25.4052	29.4
RXN10923.1	A0A498LTI4	Heat Shock Cognate 71 Kda	33.0212	35.2014
RXN11759.1	A0A498LTK5	Tar Dna-Binding 43-Like Isoform X1	26.8951	29.2424
RXN10963.1	A0A498LTM5	Nuclear Pore Complex Protein Nup107	24.9313	26.5528
RXN11799.1	A0A498LTP4	Heterogeneous Nuclear Ribonucleo D0-Like Isoform X1	26.4744	29.2124
RXN10194.1	A0A498LTS6	60S Ribosomal L38	26.6361	28.874
RXN08837.1	A0A498LTT6	Nidogen-2 Isoform X1	27.4417	30.8032
RXN08785.1	A0A498LTT9	Fumarate Mitochondrial	30.8335	27.5352
RXN08847.1	A0A498LTU4	Fatty Acid-Binding Brain-Like Protein	21.2287	28.8774
RXN08795.1	A0A498LTU8	Cytochrome C Oxidase Subunit 4 Isoform Mitochondrial	30.1586	26.075
RXN08815.1	A0A498LTW8	Src Substrate Cortactin Isoform X1	22.6396	26.2835
RXN11590.1	A0A498LTZ7	Arginine--Trna Cytoplasmic	28.5458	28.8059
RXN08957.1	A0A498LU62	Transport Sec31A-Like Protein	25.9163	28.5641
RXN11690.1	A0A498LU93	Glycine N-Methyltransferase	24.675	29.6417
RXN10384.1	A0A498LUB5	Atp-Binding Cassette Sub-Family G Member 4	24.9982	27.056
RXN11223.1	A0A498LUC6	Keratin 8	33.708	35.931
RXN11801.1	A0A498LUE7	Enolase-Phosphatase E1	22.1482	24.3423
RXN11760.1	A0A498LUF5	Zinc Finger Zpr1	26.995	30.3585
RXN11811.1	A0A498LUF6	Methylglutaconyl- Mitochondrial	28.0839	24.0602
RXN11253.1	A0A498LUF9	Syndecan Binding 2	26.2451	27.2682
RXN12098.1	A0A498LUG3	Alanyl-Trna Editing Aarsd1	21.937	25.6745
RXN11831.1	A0A498LUH2	Putative Atp-Dependent Rna Helicase Ddx4 Isoform X2	30.1635	34.3019
RXN11841.1	A0A498LUI2	Serine Threonine- Phosphatase 2A Catalytic Subunit Beta Isoform	28.7782	28.8779
RXN11800.1	A0A498LUJ4	Heterogeneous Nuclear Ribonucleo D-Like Protein	27.2818	29.1814
RXN09097.1	A0A498LUM0	Bestrophin-2-Like Protein	27.3974	28.3292
RXN09117.1	A0A498LUN9	Malate Cytoplasmic-Like Protein	30.7157	29.1923
RXN09045.1	A0A498LUR4	G- Coupled Receptor Family C Group 5 Member B-Like Protein	23.4893	29.5763
RXN12299.1	A0A498LV15	40S Ribosomal S3A	33.5398	30.4554
RXN10996.1	A0A498LV43	Cathepsin D	22.6984	24.5603
RXN11593.1	A0A498LVF1	Kv Channel-Interacting 1-Like Isoform X2	28.5038	29.3451
RXN12221.1	A0A498LVI3	Mrna Turnover 4-Like Protein	24.5006	24.9444
RXN05685.1	A0A498LVL4	Ras-Related Rab-18	24.3398	28.3178
RXN12220.1	A0A498LVN3	Aflatoxin B1 Aldehyde Reductase Member 4-Like Protein	26.2216	28.4187
RXN09375.1	A0A498LVN4	Nidogen-1	24.8133	29.7302
RXN12281.1	A0A498LVN5	60S Ribosomal L15	28.8057	29.6357
RXN11713.1	A0A498LVR7	Basement Membrane-Specific Heparan Sulfate Proteoglycan Core -Li	29.8101	33.2274
RXN12559.1	A0A498LVS6	Annexin A6-Like Isoform X2	23.0909	30.3671
RXN10964.1	A0A498LVT1	Guanine Nucleotide-Binding G(I) Subunit Alpha-1	24.5623	27.6458
RXN11753.1	A0A498LVV3	Structural Maintenance Of Chromosomes 1A	23.4815	23.0243
RXN09455.1	A0A498LVV4	Kh Domain- Rna- Signal Transduction-Associated 1-Like Protein	25.6614	29.5968
RXN11773.1	A0A498LVX1	Phosphatidylinositol-Binding Clathrin Assembly -Like Isoform X1	21.0354	27.548
RXN09477.1	A0A498LVZ6	Proteasome Subunit Alpha Type-1	27.925	29.8685
RXN11326.1	A0A498LVZ9	Maleylacetoacetate Isomerase Isoform X2	21.4524	24.1774
RXN12678.1	A0A498LW12	Nuclease-Sensitive Element-Binding 1-Like Isoform X1	30.1728	33.2298
RXN11823.1	A0A498LW71	Talin-1 Isoform X1	26.8685	29.5867
RXN11843.1	A0A498LW95	Histidine Triad Nucleotide-Binding 1	24.3579	28.381
RXN12491.1	A0A498LWA9	Cytoplasmic Dynein 1 Light Intermediate Chain 2-Like Isoform X1	26.2178	26.5823
RXN12838.1	A0A498LWD3	Tetratricopeptide Repeat 25	29.3226	29.3682
RXN12809.1	A0A498LWE3	Lim And Sh3 Domain 1-Like Protein	27.4759	30.1743
RXN12541.1	A0A498LWE7	Electron Transfer Flavo -Ubiquinone Mitochondrial	27.0522	24.8622
RXN12839.1	A0A498LWG6	Atp-Citrate Synthase	27.8166	31.5035
RXN12561.1	A0A498LWG8	Glutathione Peroxidase 3	22.9604	24.3842
RXN12540.1	A0A498LWH4	Peptidyl-Prolyl Cis-Trans Isomerase D	23.428	28.9312
RXN02396.1	A0A498LWK8	Intermediate Filament On3-Like Isoform X2	28.5872	32.2627
RXN09657.1	A0A498LWM7	26S Proteasome Non-Atpase Regulatory Subunit 11B	22.9077	23.3591
RXN12929.1	A0A498LWN5	Spectrin Alpha Non-Erythrocytic 1 Isoform X4	27.7923	31.427
RXN12610.1	A0A498LWP3	Serine Threonine- Kinase Mtor	22.2224	23.6702
RXN09697.1	A0A498LWS5	Nadh Dehydrogenase [Ubiquinone] Flavo Mitochondrial	30.5631	23.6378
RXN11344.1	A0A498LWW5	Activator Of 90 Kda Heat Shock Atpase -Like Protein	22.2272	25.7806
RXN12801.1	A0A498LX35	Prohibitin	31.5745	28.1304
RXN12821.1	A0A498LX53	Dna Polymerase Delta Catalytic Subunit	26.2546	25.3687
RXN12841.1	A0A498LX75	Estradiol 17-Beta-Dehydrogenase 1	22.6215	23.1201
RXN12800.1	A0A498LX76	Major Vault	24.0043	26.3941
RXN12820.1	A0A498LX98	Vesicular Glutamate Transporter 1-Like Protein	21.4578	26.2555
RXN12223.1	A0A498LXF0	Delta-1-Pyrroline-5-Carboxylate Mitochondrial	28.0667	27.5086
RXN10095.1	A0A498LXG5	Inactive Hydroxysteroid Dehydrogenase 1	27.3118	24.0761
RXN12930.1	A0A498LXI4	Wd Repeat-Containing 34	24.8297	28.7346
RXN11936.1	A0A498LXK5	Coagulation Factor Xiii A Chain-Like Protein	31.7584	24.2979
RXN11060.1	A0A498LXQ7	Adenylate Kinase Isoenzyme 1	25.245	28.6324
RXN11714.1	A0A498LXZ0	Basement Membrane-Specific Heparan Sulfate Proteoglycan Core -Li	24.652	30.0703
RXN12433.1	A0A498LY02	Profilin-2-Like Isoform X2	26.5596	31.8958
RXN11754.1	A0A498LY23	Spermidine Synthase	25.8816	26.3008
RXN11764.1	A0A498LY34	Hypoxia Up-Regulated 1	28.4853	30.5321
RXN13141.1	A0A498LY36	Atp-Dependent (S)-Nad(P)H-Hydrate Dehydratase Isoform X3	23.4421	23.6411
RXN32623.1	A0A498LY83	Serpin H1-Like Protein	23.3637	26.0441
RXN12513.1	A0A498LY84	Collagen Type Iv Alpha-3-Binding -Like Protein	23.3985	24.0308
RXN11824.1	A0A498LY90	Gamma-Secretase Subunit Aph-1B-Like Protein	26.0443	30.7708
RXN12533.1	A0A498LYA1	Alpha-Taxilin-Like Protein	29.9438	27.6547
RXN12216.1	A0A498LYB8	Deglycase Dj-1	25.7039	30.1439
RXN11934.1	A0A498LYJ3	Enoyl- Delta Isomerase Mitochondrial-Like Isoform X1	24.6783	23.7554
RXN10247.1	A0A498LYK8	14-3-3 Beta Alpha-A-Like Protein	28.9718	29.5714
RXN10575.1	A0A498LYU7	Epoxide Hydrolase 1	27.9381	28.4955
RXN12562.1	A0A498LYU8	Dynactin Subunit 4 Isoform X2	23.9092	24.9491
RXN12612.1	A0A498LZ02	Glutamine--Trna Ligase	28.1378	29.6872
RXN13491.1	A0A498LZ21	Zinc Finger Bed Domain-Containing 4-Like Protein	29.7665	22.4615
RXN12793.1	A0A498LZ25	Phosphatidylinositol Transfer Beta Isoform-Like Protein	24.2033	25.7299
RXN10655.1	A0A498LZ34	Gem-Associated 5-Like Isoform X1	25.879	27.1638
RXN12642.1	A0A498LZ42	Mitofusin-2	25.1458	24.498
RXN12652.1	A0A498LZ52	Sodium-Dependent Lysophosphatidylcholine Symporter 1-Like Protei	24.9118	28.6426
RXN13929.1	A0A498LZD2	Lamin-B1	25.0074	29.7047
RXN12832.1	A0A498LZM8	Potassium Voltage-Gated Channel Subfamily H Member 4-Like Protei	27.1103	26.1823
RXN10677.1	A0A498LZY5	Phosphoglycerate Kinase 1	30.3882	30.5091
RXN11025.1	A0A498M044	Peptide Mitochondrial	23.0219	21.1987
RXN13930.1	A0A498M070	Phosphorylated Adapter Rna Export	23.7563	23.2757
RXN13931.1	A0A498M088	Alpha-Aminoadipic Semialdehyde Dehydrogenase	30.1486	29.4828
RXN06742.1	A0A498M0B1	Peroxiredoxin-1	30.2841	32.8405
RXN11075.1	A0A498M0F5	Exosome Complex Component Rrp4	24.1707	21.5921
RXN14339.1	A0A498M0I3	Fructose-Bisphosphate Aldolase C	28.8914	31.412
RXN12976.1	A0A498M0I6	60S Ribosomal L7-Like 1	23.9398	22.3223
RXN10977.1	A0A498M0S1	Acyl- Synthetase Short-Chain Family Member Mitochondrial	22.4141	26.534
RXN36780.1	A0A498M105	Disulfide-Isomerase Isoform X2	31.42	31.5044
RXN13166.1	A0A498M118	Dehydrogenase Reductase Sdr Family Member 13-Like Protein	23.6597	24.1612
RXN12794.1	A0A498M147	Heat Shock 70	27.56	33.6812
RXN27739.1	A0A498M148	Translation Initiation Factor Eif-2B Subunit Epsilon	24.9304	27.0014
RXN28428.1	A0A498M167	Desmoplakin-Like Protein	23.2854	24.378
RXN11157.1	A0A498M1B4	Zinc Finger C2Hc Domain-Containing 1A Isoform X1	21.5468	27.1039
RXN13266.1	A0A498M1B8	Importin Subunit Alpha-3	33.1574	29.5129
RXN14639.1	A0A498M1C7	Succinate Dehydrogenase [Ubiquinone] Flavo Mitochondrial	29.879	28.6626
RXN11515.1	A0A498M1G8	Eukaryotic Translation Initiation Factor 4H Isoform X3	26.3896	28.8409
RXN11287.1	A0A498M1Q4	Nascent Polypeptide-Associated Complex Subunit Muscle-Specific F	30.2175	28.5459
RXN11307.1	A0A498M1S6	Asparagine--Trna Cytoplasmic	27.5651	28.6366
RXN11327.1	A0A498M1U7	Methylmalonate-Semialdehyde Dehydrogenase [Acylating] Mitochondr	30.6426	27.7458
RXN11655.1	A0A498M1W5	Ap-3 Complex Subunit Beta-1-Like Protein	24.2987	27.0395
RXN13532.1	A0A498M1Y0	Sumo-Activating Enzyme Subunit 2	23.2584	28.3224
RXN14898.1	A0A498M245	Leukocyte Elastase Inhibitor-Like Isoform X2	28.4201	27.3069
RXN13602.1	A0A498M278	Vitelline Membrane Outer Layer 1-Like Protein	25.1564	32.2093
RXN13314.1	A0A498M2G5	Nuclear Pore Complex Protein Nup214-Like	25.0532	22.7277
RXN14770.1	A0A498M2L1	Collagen Alpha-1(Xii) Chain-Like Isoform X1	24.8342	27.3445
RXN14811.1	A0A498M2R0	60S Ribosomal L5	31.0775	29.0234
RXN11975.1	A0A498M2T9	N(G),N(G)-Dimethylarginine Dimethylaminohydrolase 1	22.2576	24.4962
RXN13544.1	A0A498M340	Guanine Nucleotide-Binding G(I) G(S) G(T) Subunit Beta-1	26.9815	29.554
RXN13896.1	A0A498M343	Gtp-Binding Nuclear Ran	30.9906	32.2483
RXN15358.1	A0A498M3C1	Trafficking Particle Complex Subunit 8 Isoform X1	21.0647	24.3442
RXN15369.1	A0A498M3C3	Desmoglein-2-Like Protein	22.4465	24.2867
RXN11827.1	A0A498M3F5	Receptor Expression-Enhancing 5-Like Protein	25.7721	24.5644
RXN14036.1	A0A498M3I4	Cytochrome B-C1 Complex Subunit Mitochondrial-Like Protein	30.6946	26.6342
RXN15130.1	A0A498M3M6	Sodium Potassium-Transporting Atpase Subunit Alpha-2	27.8939	25.6174
RXN15261.1	A0A498M3Y7	Dynamin-2 Isoform X1	22.3307	26.9562
RXN15568.1	A0A498M3Z6	Y-Box-Binding 2-A-Like Isoform X2	32.6643	37.8773
RXN15578.1	A0A498M409	Dnaj -Like Protein	29.087	25.0403
RXN15331.1	A0A498M459	Translation Initiation Factor Eif-2B Subunit Delta-Like Protein	27.1314	27.8459
RXN14316.1	A0A498M4D0	Sodium Potassium-Transporting Atpase Subunit Alpha-1-Like Protei	23.7227	29.3977
RXN15421.1	A0A498M4E4	Casein Kinase Ii Subunit Alpha-Like Protein	28.7526	29.3426
RXN15431.1	A0A498M4F3	Oxidation Resistance 1-Like Isoform X1	21.7401	21.9047
RXN14376.1	A0A498M4I9	Ras-Related Rab-24	24.5941	26.9221
RXN14396.1	A0A498M4K7	Latexin-Like Isoform X2	24.951	26.6493
RXN15520.1	A0A498M4S7	Alcohol Dehydrogenase 1-Like Protein	23.9377	28.3624
RXN06605.1	A0A498M4T8	Meiotic Nuclear Division 1-Like Protein	21.7591	25.5993
RXN15590.1	A0A498M4Z7	Heterogeneous Nuclear Ribonucleo R	25.974	29.0481
RXN15959.1	A0A498M509	Calcium Signal-Modulating Cyclophilin Ligand	25.1986	26.2311
RXN15989.1	A0A498M537	Annexin A4	29.1461	30.3251
RXN16028.1	A0A498M566	Adp-Ribosylarginine Hydrolase-Like Protein	22.2404	23.3929
RXN12795.1	A0A498M572	Ataxin-2 Isoform X1	21.632	28.3811
RXN15670.1	A0A498M586	Epidermal Differentiation-Specific -Like Protein	22.5462	25.4753
RXN12865.1	A0A498M5D4	40S Ribosomal S15A	30.3882	29.8248
RXN15781.1	A0A498M5E1	Plectin Isoform X1	25.0325	28.6117
RXN13269.1	A0A498M5E4	Tripartite Motif-Containing 16-Like Protein	24.5227	26.3664
RXN15800.1	A0A498M5K6	(E3-Independent) E2 Ubiquitin-Conjugating Enzyme	22.5636	28.1178
RXN34192.1	A0A498M5K9	Guanine Nucleotide-Binding Subunit Beta-2-Like 1	31.2957	30.9673
RXN15861.1	A0A498M5L2	Atp-Dependent Rna Helicase Dhx29	23.3542	25.6028
RXN12547.1	A0A498M5Q0	Saxitoxin And Tetrodotoxin-Binding 1-Like Protein	23.374	29.2417
RXN15911.1	A0A498M5Q7	Mitochondrial 2-Oxoglutarate Malate Carrier	29.0486	24.1978
RXN15860.1	A0A498M5Q9	Atp-Dependent Rna Helicase Dhx29	23.0408	25.1351
RXN14534.1	A0A498M5S1	Piwi 1	29.2001	34.8866
RXN14856.1	A0A498M5U6	Nuclease Mitochondrial	24.8125	24.0432
RXN16288.1	A0A498M5W8	Sec1 Family Domain-Containing 2	24.2567	26.4247
RXN16448.1	A0A498M6B2	Threonine--Trna Cytoplasmic-Like Protein	22.9559	26.7968
RXN16120.1	A0A498M6G7	Eukaryotic Translation Initiation Factor 3 Subunit B	29.2303	28.5928
RXN14902.1	A0A498M6I7	Microtubule-Associated 4-Like Isoform X1	21.2856	25.7213
RXN16130.1	A0A498M6I9	Cytoplasmic 1	35.2036	35.7786
RXN15553.1	A0A498M6L7	Troponin Slow Skeletal Muscle-Like Protein	27.2829	29.113
RXN12837.1	A0A498M6L9	Dnaj -Like Protein	24.574	27.1644
RXN16281.1	A0A498M6M7	Zygote Arrest 1	32.1312	37.3776
RXN12857.1	A0A498M6P1	Mitogen-Activated Kinase 3	26.3447	25.8418
RXN15623.1	A0A498M6T7	Forkhead Box G1-Like Protein	25.8154	30.2419
RXN16628.1	A0A498M6V0	Trifunctional Purine Biosynthetic Adenosine-3	22.4931	24.3135
RXN16629.1	A0A498M6V3	Trifunctional Purine Biosynthetic Adenosine-3	23.4752	25.3721
RXN12947.1	A0A498M6Y5	116 Kda U5 Small Nuclear Ribonucleo Component	26.4313	28.9384
RXN15132.1	A0A498M763	Kinesin-1 Heavy Chain	25.2246	26.1358
RXN09475.1	A0A498M799	60S Ribosomal L27A	30.9466	28.0059
RXN13535.1	A0A498M7B3	Kelch Domain-Containing 4	24.8413	22.6055
RXN16305.1	A0A498M7G9	Creatine Kinase B-Type	31.2501	30.124
RXN13137.1	A0A498M7H1	Collagen Alpha-1(Iv) Chain	22.7839	25.3846
RXN16888.1	A0A498M7I3	26S Proteasome Non-Atpase Regulatory Subunit 2	27.7655	28.4126
RXN13157.1	A0A498M7J9	Katanin P60 Atpase-Containing Subunit A-Like 1	24.3089	28.802
RXN16998.1	A0A498M7T0	Death-Associated -Like 1-B	27.2856	26.0278
RXN16731.1	A0A498M7U6	Ras-Related Rab-15	23.2479	24.077
RXN16580.1	A0A498M7V0	60S Ribosomal L24	31.9344	28.6394
RXN17028.1	A0A498M7W0	Carnitine O-Acetyltransferase-Like Protein	26.7331	27.8169
RXN15432.1	A0A498M809	Nad(P)H-Hydrate Epimerase	23.8769	27.6448
RXN15364.1	A0A498M831	Proteasome Subunit Alpha Type-7-Like Protein	30.8058	29.5314
RXN17158.1	A0A498M886	Tripeptidyl-Peptidase 1-Like Protein	27.8057	29.0261
RXN15484.1	A0A498M8E6	Endoplasmin	31.9987	33.8411
RXN16193.1	A0A498M8I5	Endophilin-A2-Like Isoform X2	22.393	25.373
RXN17041.1	A0A498M8K9	Glutathione S-Transferase A-Like Protein	31.2115	33.8033
RXN17349.1	A0A498M8N9	Atp-Binding Cassette Sub-Family F Member 2	24.8392	27.2516
RXN17171.1	A0A498M8V5	Cytoplasmic Polyadenylation Element-Binding 1 Isoform X3	31.366	35.3824
RXN17000.1	A0A498M9B4	26S Proteasome Non-Atpase Regulatory Subunit 3	29.2737	28.584
RXN17738.1	A0A498M9M2	Decorin-Like Protein	27.48	31.149
RXN17748.1	A0A498M9M9	Serine-Threonine Kinase Receptor-Associated -Like Protein	28.5943	28.8374
RXN17799.1	A0A498M9R8	Inosine-5 -Monophosphate Dehydrogenase 1B-Like Isoform X4	25.5421	29.6553
RXN17838.1	A0A498M9V6	Coatomer Subunit Gamma-2	27.7823	29.8061
RXN17839.1	A0A498M9W0	Denn Domain-Containing 5B Isoform X5	27.4396	25.8555
RXN17591.1	A0A498M9X2	Laminin Subunit Alpha-4	23.89	26.6604
RXN13957.1	A0A498M9Z8	Heavy Subunit	29.7727	30.873
RXN16222.1	A0A498MA04	Drebrin A Isoform X1	21.1502	22.9271
RXN17180.1	A0A498MA26	Carnitine O-Palmitoyltransferase Liver Isoform-Like Protein	23.0431	25.5591
RXN17200.1	A0A498MA51	Succinate Dehydrogenase [Ubiquinone] Iron-Sulfur Mitochondrial	28.2967	26.0432
RXN17711.1	A0A498MA84	Aldose Reductase-Like Protein	27.6228	29.9221
RXN16332.1	A0A498MA95	39S Ribosomal Mitochondrial	28.4777	20.8616
RXN17998.1	A0A498MAA3	Letm1 Domain-Containing 1-Like Protein	22.2264	26.237
RXN17270.1	A0A498MAB6	Septin-2B Isoform X1	24.113	28.3484
RXN18019.1	A0A498MAC6	Sec13-Like Protein	26.7093	26.7841
RXN18039.1	A0A498MAE5	Ubiquitin Carboxyl-Terminal Hydrolase Isozyme L5	29.4065	27.9955
RXN16382.1	A0A498MAF0	Proteasome Subunit Alpha Type-1	27.6781	28.1276
RXN16422.1	A0A498MAI2	Deoxyuridine 5 -Triphosphate Mitochondrial Isoform X2	24.9147	26.0914
RXN17300.1	A0A498MAL1	Rho Gtpase-Activating 1-Like Isoform X3	25.6873	27.8093
RXN18128.1	A0A498MAL2	Lambda-Crystallin-Like Protein	23.7977	25.3792
RXN18218.1	A0A498MAU7	Arpin	24.8034	22.1436
RXN16404.1	A0A498MAW9	Homer -Like Protein	25.2951	24.0089
RXN18248.1	A0A498MAX6	Zwilch-Like Protein	24.2593	24.0694
RXN17410.1	A0A498MAY9	Septin-8-Like Isoform X2	23.308	24.2346
RXN18278.1	A0A498MB05	Nuclear Pore Complex Nup93 Isoform X2	26.7463	27.0448
RXN17510.1	A0A498MB86	Delta-Aminolevulinic Acid Dehydratase-Like Protein	28.0122	29.798
RXN18408.1	A0A498MBC1	Phosphoglucomutase 5	22.7004	26.4857
RXN18261.1	A0A498MBG5	Splicing Factor 3B Subunit 3	23.8228	27.9957
RXN16812.1	A0A498MBJ8	Zona Pellucida Sperm-Binding 3-Like Isoform X1	35.9203	28.58
RXN17203.1	A0A498MBL7	Atpase Family Aaa Domain-Containing 3A	24.3761	26.1513
RXN17233.1	A0A498MBP6	Apoptosis Inhibitor 5	29.4858	28.1356
RXN04189.1	A0A498MBS7	Dnaj -Like Protein	22.1025	26.805
RXN17710.1	A0A498MBT3	Aldose Reductase-Like Protein	28.7211	29.2935
RXN18441.1	A0A498MBX9	Putative Atp-Dependent Rna Helicase Ddx20	22.4723	25.8116
RXN16992.1	A0A498MC33	X-Ray Repair Cross-Complementing 5	23.6581	27.505
RXN17002.1	A0A498MC44	Nedd8-Conjugating Enzyme Ubc12	25.1709	27.4018
RXN17403.1	A0A498MC52	60S Ribosomal L31	30.6781	28.9479
RXN17042.1	A0A498MC86	Glutathione S-Transferase A-Like Protein	28.4079	30.6769
RXN16736.1	A0A498MC88	Acyl-Coenzyme A Thioesterase 1-Like Protein	26.7405	26.3854
RXN16746.1	A0A498MCA2	14-3-3 Zeta Delta-Like Protein	26.7298	29.2313
RXN18799.1	A0A498MCG5	Large Proline-Rich Bag6-Like Protein	23.5967	25.3645
RXN17553.1	A0A498MCL6	Serine Threonine- Phosphatase 2A 65 Kda Regulatory Subunit A Bet	26.2375	26.4372
RXN32604.1	A0A498MCN8	M7 Diphosphatase	22.1868	24.9176
RXN17202.1	A0A498MCP4	Atpase Family Aaa Domain-Containing 3A	27.7553	27.2497
RXN14887.1	A0A498MCT5	Vesicle-Associated Membrane -Associated A	25.4507	25.57
RXN17623.1	A0A498MCU0	Beta,Beta-Carotene 15,15 -Dioxygenase-Like Protein	23.6081	26.0488
RXN19068.1	A0A498MD26	Alpha-Aminoadipic Semialdehyde Mitochondrial-Like Protein	21.3217	26.2575
RXN17016.1	A0A498MD37	40S Ribosomal S18	31.2384	30.5014
RXN17026.1	A0A498MD47	N(G),N(G)-Dimethylarginine Dimethylaminohydrolase 2-Like Protein	23.3417	26.9597
RXN17743.1	A0A498MD49	Glycogen [Starch] Liver	22.1763	24.7372
RXN19069.1	A0A498MD56	Alpha-Aminoadipic Semialdehyde Mitochondrial-Like Protein	24.4583	26.598
RXN23365.1	A0A498MD60	Alpha-Ketoglutarate-Dependent Dioxygenase Alkb -Like Protein	24.9505	27.701
RXN19108.1	A0A498MD61	Maguk P55 Subfamily Member 5-A-Like Protein	30.0105	30.1503
RXN18911.1	A0A498MD67	Vasodilator-Stimulated Phospho -Like Protein	20.3333	23.4701
RXN17402.1	A0A498MDE1	Ccr4-Not Transcription Complex Subunit 11	22.1201	25.7469
RXN18260.1	A0A498MDH5	Alanine--Trna Cytoplasmic Isoform X1	27.4529	29.1409
RXN17354.1	A0A498MDH6	Vacuolar Sorting-Associated 35	26.1423	27.5305
RXN19268.1	A0A498MDJ5	Sorting Nexin-6	25.0707	25.1308
RXN27357.1	A0A498MDK5	Proteasome Subunit Alpha Type-3	27.9574	28.6415
RXN17472.1	A0A498MDL6	40S Ribosomal S17	25.3138	27.4179
RXN17216.1	A0A498MDP7	Transforming -Like Protein	27.5912	26.8002
RXN23366.1	A0A498MDR7	Disulfide-Isomerase A3	32.3075	32.6428
RXN17286.1	A0A498MDW1	Cugbp Elav-Like Family Member 1 Isoform X1	27.3848	31.3881
RXN15665.1	A0A498MDW3	Calcium-Binding 1-Like Protein	26.5756	26.416
RXN19231.1	A0A498MDY1	Hsp90 Co-Chaperone Cdc37	24.2659	26.7574
RXN17326.1	A0A498MDZ5	Grpe -Like Protein	24.1036	26.1874
RXN15725.1	A0A498ME07	2-Oxoisovalerate Dehydrogenase Subunit Mitochondrial	29.6909	24.1449
RXN17356.1	A0A498ME23	Dnaj -Like Protein	26.1065	26.948
RXN19488.1	A0A498ME38	Type Ii Cytoskeletal 8-Like Protein	24.2896	26.8169
RXN15805.1	A0A498ME85	Signal Recognition Particle Subunit Srp68	25.8939	31.7817
RXN08075.1	A0A498ME94	Ist1 -Like Protein	24.9763	25.5816
RXN17712.1	A0A498MEA3	26S Protease Regulatory Subunit 7	29.4982	27.9515
RXN18113.1	A0A498MEA4	Lim Domain Only 7-Like Isoform X7	27.6558	31.1703
RXN15427.1	A0A498MEI7	Exosome Complex Component Rrp42	23.0729	22.3666
RXN19698.1	A0A498MEQ4	Rab Gdp Dissociation Inhibitor Beta	29.2804	30.3183
RXN18293.1	A0A498MER3	Amp Deaminase 3-Like Isoform X1	21.5649	25.814
RXN18680.1	A0A498MEU0	High Mobility Group B3-Like Protein	23.9943	28.2605
RXN19581.1	A0A498MEV5	Myosin-9 Isoform X1	30.8835	31.1513
RXN20001.1	A0A498MEZ8	Nadh Dehydrogenase 1 Beta Subcomplex Subunit 10	29.5711	25.2779
RXN18393.1	A0A498MF00	U5 Small Nuclear Ribonucleo Protein 200 Kda Helicase	26.6315	27.8667
RXN16125.1	A0A498MF51	Actin-Related 2 3 Complex Subunit 1A	27.5493	25.7364
RXN18022.1	A0A498MF83	U6 Snrna-Associated Sm Lsm3	27.4037	32.0319
RXN07897.1	A0A498MFA2	Plasminogen Receptor (Kt)	23.7654	21.9459
RXN16185.1	A0A498MFB9	Supervillin-Like Isoform X3	24.2065	23.8133
RXN19969.1	A0A498MFH6	Importin Subunit Alpha-1-Like Protein	30.1962	24.8147
RXN17756.1	A0A498MFK6	Nucleoporin Nup37 Isoform X2	25.4888	23.7341
RXN18643.1	A0A498MFP7	26S Protease Regulatory Subunit 4	22.8172	29.8879
RXN18990.1	A0A498MFQ8	Lanc 1	22.5246	25.3812
RXN18212.1	A0A498MFS6	Aspartate Mitochondrial-Like Protein	30.1758	28.3936
RXN36988.1	A0A498MFZ0	Beta-Hexosaminidase Subunit Alpha-Like Protein	23.2111	22.0837
RXN18324.1	A0A498MG21	60S Ribosomal L4	32.6373	28.8924
RXN20198.1	A0A498MG29	Eukaryotic Translation Initiation Factor 2D	22.2438	27.6748
RXN18344.1	A0A498MG41	Tubulin Gamma-1 Chain	25.8217	23.3573
RXN17916.1	A0A498MG46	Peroxiredoxin-6-Like Protein	27.2633	27.3557
RXN19807.1	A0A498MG59	40S Ribosomal S2	32.4118	31.2227
RXN18384.1	A0A498MG85	Succinyl- :3-Ketoacid Coenzyme A Transferase Mitochondrial	26.3125	19.8627
RXN18394.1	A0A498MG97	Outer Dense Fiber 2-Like Isoform X3	29.3261	27.5387
RXN20388.1	A0A498MGL5	Atp Synthase Subunit Mitochondrial-Like Protein	24.0126	23.981
RXN19280.1	A0A498MGL9	26S Protease Regulatory Subunit 4	29.4259	29.8004
RXN18544.1	A0A498MGN9	Upf0609 C4Orf27-Like Protein	25.6936	27.9119
RXN18532.1	A0A498MGP0	Sialic Acid Synthase	27.226	31.0939
RXN20261.1	A0A498MGP6	Phosphatidylinositide Phosphatase Sac1-B	26.3746	24.6916
RXN18116.1	A0A498MGQ3	Es1 Mitochondrial-Like Protein	29.2766	27.7922
RXN20271.1	A0A498MGQ4	Regulator Of G- Signaling 18-Like Protein	21.7932	19.5781
RXN20468.1	A0A498MGT9	Diphthine Methyl Ester Synthase	23.3974	26.631
RXN20371.1	A0A498MGY9	Ekc Keops Complex Subunit Tprkb-Like Protein	21.9554	23.8477
RXN20538.1	A0A498MGZ9	Atp Synthase Subunit Mitochondrial	27.4835	26.9079
RXN15176.1	A0A498MH08	Carbonyl Reductase Family Member 4	22.2802	27.1303
RXN20589.1	A0A498MH29	Ap-3 Complex Subunit Delta-1-Like Isoform X1	21.7932	24.3607
RXN20618.1	A0A498MH55	Tubulin Alpha-8 Chain-Like Protein	33.914	31.7137
RXN20471.1	A0A498MH64	Antithrombin-Iii-Like Isoform X1	22.9125	28.0899
RXN20638.1	A0A498MH76	O-Phosphoseryl-Trna(Sec) Selenium Transferase	22.5199	29.4326
RXN19143.1	A0A498MH81	Serine Threonine- Phosphatase 2A 55 Kda Regulatory Subunit B Alp	28.6637	27.3556
RXN20649.1	A0A498MH82	Pre-Mrna-Splicing Factor Atp-Dependent Rna Helicase Dhx15	23.6531	32.1691
RXN20491.1	A0A498MH85	Cold-Inducible Rna-Binding B-Like Isoform X1	25.8649	27.7902
RXN16765.1	A0A498MHB2	Kinesin Kif25	24.6959	25.5125
RXN19183.1	A0A498MHB9	Nadh Dehydrogenase [Ubiquinone] 1 Alpha Subcomplex Subunit 6	27.0262	25.2968
RXN16417.1	A0A498MHD6	Nad(P) Mitochondrial-Like Protein	29.2189	27.4801
RXN19570.1	A0A498MHG1	Pdz And Lim Domain 5-Like Isoform X1	23.2902	25.5733
RXN20571.1	A0A498MHG4	Serine Arginine-Rich Splicing Factor 9-Like Protein	23.6095	27.2513
RXN19580.1	A0A498MHH0	Myosin-9 Isoform X1	27.9333	29.9299
RXN20621.1	A0A498MHL4	Serine Threonine- Phosphatase 2A 56 Kda Regulatory Subunit Delta	24.0381	27.1239
RXN08736.1	A0A498MHN6	Afg3 2	24.8535	22.3739
RXN20819.1	A0A498MHP4	Serine Threonine- Kinase Pak 2	23.8093	26.866
RXN20829.1	A0A498MHP7	2-Oxoglutarate Mitochondrial Isoform X2	28.6622	26.762
RXN20828.1	A0A498MHQ4	Peptidyl-Prolyl Cis-Trans Isomerase-Like Protein	29.1489	31.8162
RXN18436.1	A0A498MHR0	Tyrosine- Phosphatase Non-Receptor Type 1-Like Protein	25.3328	28.8102
RXN20681.1	A0A498MHT5	Gc-Rich Sequence Dna-Binding Factor 2-Like Protein	23.1982	29.0109
RXN16925.1	A0A498MHT8	26S Proteasome Non-Atpase Regulatory Subunit 2	27.5294	29.8252
RXN17146.1	A0A498MHV3	Isovaleryl- Mitochondrial	29.7263	27.4324
RXN36434.1	A0A498MHW1	Poly(U)-Specific Endoribonuclease-C-Like Protein	22.1672	26.8676
RXN16597.1	A0A498MHW2	Cullin-4A	20.5896	25.4181
RXN16627.1	A0A498MHY3	Trifunctional Purine Biosynthetic Adenosine-3	25.7688	25.1197
RXN18994.1	A0A498MI25	Monocyte To Macrophage Differentiation Factor 2-Like Isoform X2	23.3715	24.3539
RXN20781.1	A0A498MI27	Atp-Dependent Rna Helicase A Isoform X1	23.1161	27.8121
RXN18566.1	A0A498MI42	Nadh Dehydrogenase [Ubiquinone] 1 Beta Subcomplex Subunit 7	28.7379	22.5298
RXN19840.1	A0A498MI78	Transcription Activator Brg1 Isoform X1	23.1908	24.6318
RXN17115.1	A0A498MIC8	Traf2 And Nck-Interacting Kinase-Like Isoform X2	27.8187	31.7629
RXN21079.1	A0A498MIE0	V-Type Proton Atpase Subunit D 1	27.7697	23.6532
RXN19930.1	A0A498MIF8	Serine Threonine- Phosphatase 2B Catalytic Subunit Gamma Isoform	25.4502	26.8222
RXN19262.1	A0A498MIM1	Transport Sec23A	24.8821	24.3386
RXN17215.1	A0A498MIN0	Transmembrane 43	25.6745	21.9255
RXN02462.1	A0A498MIP6	Pctp	25.4304	26.9184
RXN19264.1	A0A498MIT6	Transport Sec23A	25.9087	26.8816
RXN19723.1	A0A498MIW9	Microsomal Glutathione S-Transferase 1-Like Protein	23.3883	25.6462
RXN17295.1	A0A498MJ03	26S Protease Regulatory Subunit 6A	30.2357	29.1417
RXN21071.1	A0A498MJ08	Epithelial Splicing Regulatory 2 Isoform X1	23.8018	28.7849
RXN21329.1	A0A498MJ13	Stomatin Mitochondrial	28.9559	27.5118
RXN19773.1	A0A498MJ18	Cullin-Associated Nedd8-Dissociated 1	28.1322	31.2102
RXN18876.1	A0A498MJ33	Dolichyl-Diphosphooligosaccharide-- Glycosyltransferase Subunit	26.9024	26.5943
RXN20250.1	A0A498MJ87	Casein Kinase Ii Subunit Beta	26.0329	28.7499
RXN21458.1	A0A498MJD4	Triokinase Fmn Cyclase	24.0129	29.1425
RXN19923.1	A0A498MJF6	Flocculation Flo11-Like Protein	31.7673	28.5116
RXN17797.1	A0A498MJJ2	Ras-Related Rap-1B	23.8444	26.5769
RXN20013.1	A0A498MJN9	Alpha-2-Macroglobulin Receptor-Associated	24.7922	26.2679
RXN21529.1	A0A498MJQ0	Prefoldin Subunit 3-Like Protein	23.7841	26.7715
RXN17535.1	A0A498MJQ9	Nucleolysin Tia-1 Isoform X1	26.4213	28.4183
RXN21628.1	A0A498MJS7	V-Type Proton Atpase Subunit H Isoform X1	25.5145	27.0948
RXN20063.1	A0A498MJT7	Mannosyl-Oligosaccharide Glucosidase-Like Protein	26.0194	25.3637
RXN21579.1	A0A498MJU1	High Mobility Group B3-Like Protein	23.4498	24.3795
RXN19136.1	A0A498MJX4	Gag-Pol Fusion Poly	26.204	26.0063
RXN21688.1	A0A498MJY6	60S Ribosomal L35	30.6034	28.0343
RXN21391.1	A0A498MJY7	Integrin Alpha-1	21.917	25.6771
RXN17287.1	A0A498MJZ1	Nadh Dehydrogenase [Ubiquinone] Iron-Sulfur Mitochondrial	29.9648	25.3611
RXN31354.1	A0A498MK55	Ras-Related Ral-B	22.5441	24.9249
RXN19724.1	A0A498MK68	Dna Helicase B-Like Protein	29.9041	27.4334
RXN19862.1	A0A498MK72	Acyl- Dehydrogenase Family Member Mitochondrial	26.6291	28.7089
RXN17705.1	A0A498MK73	Putative Atp-Dependent Rna Helicase Ddx5 Isoform X1	24.2917	28.7971
RXN21481.1	A0A498MK82	Dnaj -Like Protein	24.9161	26.1434
RXN17745.1	A0A498MKB6	L-Lactate Dehydrogenase B-A Chain	32.0145	32.6798
RXN19153.1	A0A498MKC1	V-Type Proton Atpase Subunit Brain Isoform	26.7566	28.5231
RXN19784.1	A0A498MKC8	Sco1 Mitochondrial	27.5326	25.1208
RXN21541.1	A0A498MKE8	Gmp Reductase 2-Like Protein	26.29	24.8288
RXN21561.1	A0A498MKG8	Lrr And Pyd Domains-Containing 12	27.4472	27.3004
RXN17805.1	A0A498MKL8	Hypothetical Protein	28.9549	27.2554
RXN20042.1	A0A498MKM0	Catenin Delta-1-Like Isoform X1	23.9564	29.2305
RXN17567.1	A0A498MKR0	Phosphoglycerate Mutase 1	26.1759	32.0689
RXN17577.1	A0A498MKR8	Cdk-Activating Kinase Assembly Factor Mat1	24.0721	24.8222
RXN21661.1	A0A498MKU0	Segment Polarity Dishevelled -Like Protein	25.1248	23.9947
RXN21671.1	A0A498MKV5	N-Alpha-Acetyltransferase 40 Isoform X1	21.4817	27.5987
RXN17627.1	A0A498MKX6	Importin-7	27.7295	27.8356
RXN20172.1	A0A498MKZ9	Ubiquitin-Associated 2-Like Isoform X1	22.7647	27.0149
RXN20182.1	A0A498ML07	Pdz And Lim Domain 2-Like Protein	24.4267	26.6741
RXN17677.1	A0A498ML35	N-Acetylgalactosamine-6-Sulfatase	26.9799	32.6462
RXN20054.1	A0A498ML40	Mitochondrial Sodium Hydrogen Exchanger 9B2-Like Protein	29.922	27.5971
RXN17737.1	A0A498ML95	Lumican	25.8822	30.7206
RXN17747.1	A0A498MLA5	Lamina-Associated Polypeptide 2-Like Isoform X3	23.1241	25.1259
RXN20184.1	A0A498MLE9	Pdz And Lim Domain 2-Like Protein	26.4234	26.9491
RXN17837.1	A0A498MLI9	Micos Complex Subunit Mic19-Like Isoform X1	26.3835	26.4013
RXN22259.1	A0A498MLJ2	Histone-Binding Rbbp4	27.5431	27.1637
RXN21941.1	A0A498MLT3	Dna-Directed Rna Polymerase Ii Subunit Rpb3	26.5658	25.82
RXN18205.1	A0A498MLW3	Enhancer Of Mrna-Decapping 4 Isoform X2	25.9521	30.8388
RXN17987.1	A0A498MLX6	Hbs1 Isoform X1	23.747	29.0704
RXN18017.1	A0A498MLZ6	60S Ribosomal L32	29.6224	26.9703
RXN20843.1	A0A498MM11	Ras Gtpase-Activating Iqgap1	26.3994	32.3252
RXN21330.1	A0A498MM46	Prenylcysteine Oxidase 1	24.4406	23.839
RXN20464.1	A0A498MM56	Rna 3 -Terminal Phosphate Cyclase	27.7004	29.7137
RXN21350.1	A0A498MM59	Cop9 Signalosome Complex Subunit 4 Isoform X2	26.3304	26.6412
RXN20622.1	A0A498MM69	Serine Threonine- Phosphatase 2A 56 Kda Regulatory Subunit Delta	22.6591	26.6793
RXN21380.1	A0A498MM94	Annexin A3-Like Protein	24.7904	28.5149
RXN22598.1	A0A498MME2	Fam98B-Like Protein	29.171	32.7334
RXN22618.1	A0A498MMG5	Ras-Related Rab-14-Like Protein	27.3943	26.9279
RXN02335.1	A0A498MMI0	Transcobalamin-2-Like Protein	25.2985	22.3057
RXN20574.1	A0A498MMI4	Nuclear Pore Complex Protein Nup155 Isoform X1	27.062	26.808
RXN20792.1	A0A498MMJ7	Calreticulin-Like Protein	29.444	30.3314
RXN19926.1	A0A498MMK2	Exportin-7	20.9628	27.1494
RXN18257.1	A0A498MML6	E3 Ubiquitin- Ligase Arih1	22.8957	24.8165
RXN22231.1	A0A498MMT5	Wd Repeat-Containing 1	28.7056	29.2536
RXN18465.1	A0A498MMV2	Hyaluronidase-3-Like Isoform X1	25.091	22.0081
RXN20026.1	A0A498MMX0	Nadh Dehydrogenase [Ubiquinone] Iron-Sulfur Mitochondrial-Like P	28.3121	23.482
RXN20734.1	A0A498MN03	Sec1 Family Domain-Containing 1	25.9981	25.3198
RXN22919.1	A0A498MN52	Single-Stranded Dna-Binding Mitochondrial	25.2523	27.2693
RXN18447.1	A0A498MN53	F-Actin-Capping Subunit Alpha-1-Like Protein	27.0879	25.6854
RXN21720.1	A0A498MN61	E3 Sumo- Ligase 2-Like Isoform X2	28.8129	25.9507
RXN18585.1	A0A498MN87	Translocon-Associated Subunit Gamma	25.7012	24.4478
RXN18595.1	A0A498MN94	L-Isoaspartated-Aspartate O-Methyltransferase	25.8875	29.2551
RXN23019.1	A0A498MNF1	Eukaryotic Initiation Factor 4A-Iii	23.2473	27.7337
RXN23029.1	A0A498MNF8	Guanine Nucleotide-Binding Subunit Beta-4	23.8535	29.6904
RXN23008.1	A0A498MNH2	Pyrroline-5-Carboxylate Reductase Mitochondrial-Like Protein	29.5645	27.9377
RXN23018.1	A0A498MNH9	60S Ribosomal L37A	27.5034	25.1167
RXN21182.1	A0A498MNJ6	Cyclin-Dependent Kinase 7	24.0604	23.891
RXN20266.1	A0A498MNM0	Spliceosome Rna Helicase Ddx39B	24.1723	26.5951
RXN21242.1	A0A498MNP7	Malonyl- -Acyl Carrier Mitochondrial	24.4002	24.8782
RXN06080.1	A0A498MNQ9	Trna Methyltransferase 10 -Like Protein	21.3481	27.4499
RXN20326.1	A0A498MNT9	Metaxin-1-Like Protein	26.0185	26.3604
RXN20336.1	A0A498MNV1	Hypothetical Protein	27.93	26.0762
RXN07461.1	A0A498MP37	Plasminogen-Like Protein	25.537	27.701
RXN18865.1	A0A498MP51	Acetyl- Mitochondrial	30.1297	29.7425
RXN23309.1	A0A498MP79	Bystin	22.1157	19.9847
RXN21613.1	A0A498MP80	Coatomer Subunit Beta	26.8962	31.4835
RXN21673.1	A0A498MPE7	Proline- Glutamic Acid- And Leucine-Rich 1-Like Protein	22.902	23.5327
RXN22210.1	A0A498MPF1	Dna Replication Licensing Factor Mcm7	27.0992	25.2247
RXN23388.1	A0A498MPG3	Enhancer Of Mrna-Decapping 3	24.725	29.7529
RXN22230.1	A0A498MPH1	Wd Repeat-Containing 1	27.6792	27.5586
RXN21542.1	A0A498MPI0	Nedd8-Like Protein	23.9465	26.1307
RXN21562.1	A0A498MPK1	Adenosine Deaminase Domain-Containing 2-Like Isoform X1	23.0476	29.841
RXN22751.1	A0A498MPP4	Hemoglobin Subunit Alpha-Like Protein	25.7092	35.7501
RXN23519.1	A0A498MPP7	Transitional Endoplasmic Reticulum Atpase	32.0153	31.5625
RXN20586.1	A0A498MPQ1	Ubx Domain-Containing 6-Like Protein	23.3382	25.9617
RXN21354.1	A0A498MPQ6	Hydroxysteroid Dehydrogenase 2	28.5597	26.0395
RXN19075.1	A0A498MPS8	Ccr4-Not Transcription Complex Subunit 2 Isoform X2	23.0778	26.6083
RXN02662.1	A0A498MPV8	Ubiquitin-Like Modifier-Activating Enzyme 1	28.6937	31.5528
RXN23618.1	A0A498MQ10	Gamma-Soluble Nsf Attachment	23.3947	26.4146
RXN22901.1	A0A498MQ47	V-Type Proton Atpase Subunit E 1-Like Protein	24.6605	27.903
RXN22540.1	A0A498MQA7	Ribosome-Binding 1-Like Isoform X1	23.6329	21.1119
RXN19265.1	A0A498MQC4	Signal Recognition Particle 54 Kda	24.0655	29.1507
RXN22600.1	A0A498MQF4	Symplekin	24.3329	28.3942
RXN32734.1	A0A498MQJ7	Sodium-Coupled Neutral Amino Acid Transporter 7	30.8043	26.8868
RXN19267.1	A0A498MQK3	Cofilin-2	26.8399	27.5941
RXN21942.1	A0A498MQQ6	Anamorsin Isoform X1	23.5169	23.8025
RXN20956.1	A0A498MQW6	Proline-Rich 36-Like Isoform X1	21.5122	24.2666
RXN20966.1	A0A498MQX8	Calphotin-Like Isoform X2	27.2463	28.1073
RXN21754.1	A0A498MQZ9	Paladin-Like Isoform X2	29.5652	27.5681
RXN23231.1	A0A498MR33	D-3-Phosphoglycerate Dehydrogenase-Like Protein	29.1291	33.3531
RXN22333.1	A0A498MR69	Actin-Related 2 3 Complex Subunit 4	25.9569	29.3559
RXN22343.1	A0A498MR76	Tata Element Modulatory Factor-Like Protein	22.4949	27.7709
RXN24118.1	A0A498MRB6	Cellular Nucleic Acid-Binding -Like Protein	26.844	29.6788
RXN23010.1	A0A498MRG9	Tether Containing Ubx Domain For Glut4	22.9857	26.9651
RXN24239.1	A0A498MRK0	Glia-Derived Nexin-Like Protein	28.4623	25.5642
RXN22503.1	A0A498MRL6	Eukaryotic Translation Initiation Factor 3 Subunit C Isoform X1	29.0648	28.7737
RXN24268.1	A0A498MRM7	Lsm14 -Like Protein	27.7405	30.1732
RXN24289.1	A0A498MRN1	Amidophosphoribosyltransferase-Like Protein	24.6961	27.8848
RXN19705.1	A0A498MRR5	Nadh-Cytochrome B5 Reductase 3-Like Protein	29.0212	27.129
RXN19725.1	A0A498MRT9	Methionine-R-Sulfoxide Reductase B3-Like Isoform X1	21.0166	26.8126
RXN22282.1	A0A498MRU3	Fatty Acid-Binding Heart-Like Protein	27.4517	32.6357
RXN23220.1	A0A498MRY7	Tensin-1 Isoform X3	21.6639	24.378
RXN24408.1	A0A498MS17	C-1-Tetrahydrofolate Cytoplasmic	28.7697	31.0513
RXN22214.1	A0A498MS62	Cop9 Signalosome Complex Subunit 6	25.9921	27.3049
RXN24478.1	A0A498MS83	Microtubule-Associated 1B-Like Protein	24.5636	26.4776
RXN24498.1	A0A498MS99	Drebrin B	28.1003	26.6959
RXN22264.1	A0A498MSB3	Adseverin-Like Protein	23.1036	23.061
RXN06930.1	A0A498MSB4	Exportin-2	27.176	30.8791
RXN24558.1	A0A498MSF0	Translation Initiation Factor Eif-2B Subunit Alpha	26.8436	27.2241
RXN22532.1	A0A498MSI3	Dna-Directed Rna Polymerase Iii Subunit Rpc6	21.7899	25.1746
RXN02646.1	A0A498MSK2	60S Ribosomal L22-Like Protein	24.5712	26.891
RXN19145.1	A0A498MSN4	Dihydropyrimidinase-Related 2 Isoform X1	24.7053	30.5066
RXN22404.1	A0A498MSP0	Prolargin-Like Protein	21.6411	28.4595
RXN23560.1	A0A498MSQ5	Mimecan-Like Protein	23.6668	28.9303
RXN21476.1	A0A498MSR0	Egg Envelope Glyco -Like Precursor	32.6044	26.7769
RXN22963.1	A0A498MSV3	Long-Chain-Fatty-Acid-- Ligase 3-Like Protein	26.065	23.7089
RXN24799.1	A0A498MSW6	Trna (Adenine(58)-N(1))-Methyltransferase Catalytic Subunit Trmt	22.0799	24.152
RXN22682.1	A0A498MSW9	Symplekin Isoform X1	21.8604	26.3147
RXN24809.1	A0A498MSX4	Annexin A11-Like Isoform X1	27.1132	31.1596
RXN24819.1	A0A498MSX8	Catechol O-Methyltransferase Domain-Containing 1-Like Protein	24.471	28.882
RXN24798.1	A0A498MSZ6	Creatine Kinase B-Type	30.4552	30.5142
RXN22752.1	A0A498MT06	Hemoglobin Subunit Beta-Like Protein	26.8185	36.0973
RXN22554.1	A0A498MT24	Unc-45 -Like Protein	20.6742	26.9968
RXN21546.1	A0A498MT32	Prostaglandin Reductase 1-Like Protein	27.4925	30.191
RXN24929.1	A0A498MT42	Cytochrome B-C1 Complex Subunit Mitochondrial	29.9967	25.2641
RXN22594.1	A0A498MT56	Ap-2 Complex Subunit Beta Isoform X2	23.9532	26.9819
RXN22842.1	A0A498MT57	Ataxin-3 Isoform X1	22.5958	23.7557
RXN24828.1	A0A498MT60	Eukaryotic Translation Initiation Factor 4E-Like Isoform X1	25.4457	28.0459
RXN23053.1	A0A498MT67	O- Case-Like Protein	21.1853	29.9997
RXN20035.1	A0A498MT89	Fact Complex Subunit Ssrp1 Isoform X1	24.4683	29.1381
RXN22644.1	A0A498MTA7	Volume-Regulated Anion Channel Subunit Lrrc8A	22.056	26.8317
RXN21606.1	A0A498MTA8	Caprin-1-Like Isoform X1	26.054	30.4887
RXN23093.1	A0A498MTB3	Cell Division Control 42 -Like Protein	26.2617	27.6747
RXN23002.1	A0A498MTH9	Serine Arginine-Rich Splicing Factor 7 Isoform X3	23.5506	22.2956
RXN24040.1	A0A498MTT4	Dual Specificity Tyrosine-Phosphorylation-Regulated Kinase 4-Lik	31.4445	22.729
RXN20337.1	A0A498MTZ4	Atpase Family Aaa Domain-Containing 2-Like Isoform X2	28.7709	28.7008
RXN25409.1	A0A498MU51	Insulin-Like Growth Factor 2 Mrna-Binding 1	24.5416	30.6125
RXN24121.1	A0A498MU58	Nuclear Pore Membrane Glycoprotein 210	24.1075	27.209
RXN24131.1	A0A498MU70	Interferon-Induced 44-Like Protein	25.0177	27.5958
RXN25318.1	A0A498MU82	All-Trans-Retinol 13,14-Reductase	33.5918	28.8787
RXN24240.1	A0A498MU91	Serine Protease	26.1223	29.0729
RXN25509.1	A0A498MUC4	Sorbin And Sh3 Domain-Containing 2-Like Protein	23.4918	25.0287
RXN26610.1	A0A498MUC5	Amidophosphoribosyltransferase-Like Protein	24.0384	24.9679
RXN23302.1	A0A498MUC6	F-Actin-Capping Subunit	28.843	28.7634
RXN02954.1	A0A498MUF4	Ubiquitin Carboxyl-Terminal Hydrolase Isozyme L1	31.2493	33.169
RXN27813.1	A0A498MUH8	Enoyl- Mitochondrial	29.7179	27.7025
RXN25589.1	A0A498MUI6	Dna-Directed Rna Polymerases And Iii Subunit Rpabc3	21.9486	27.3789
RXN23114.1	A0A498MUK5	Heterochromatin 1-Binding 3-Like Protein	22.5462	27.4556
RXN23124.1	A0A498MUL6	Inter-Alpha-Trypsin Inhibitor Heavy Chain H3-Like Isoform X1	21.508	29.003
RXN21926.1	A0A498MUN0	Putative D-Lactate Mitochondrial	26.2465	23.0409
RXN26611.1	A0A498MUQ6	Multifunctional Ade2 Isoform X2	29.5631	30.0559
RXN02683.1	A0A498MUQ8	Filamin-A-Like Isoform X2	32.1214	32.5015
RXN20587.1	A0A498MUR0	Ap-3 Complex Subunit Delta-1-Like Isoform X3	29.679	24.6655
RXN25729.1	A0A498MUT6	Non-Muscle Caldesmon-Like Isoform X1	27.0114	29.3214
RXN20617.1	A0A498MUU2	Cullin-9 Isoform X1	25.7567	29.4966
RXN24490.1	A0A498MUU6	Ras-Related Rab-7A-Like Protein	26.634	24.6558
RXN23432.1	A0A498MUV0	Sphingosine-1-Phosphate Lyase 1-Like Protein	24.3859	24.415
RXN25598.1	A0A498MUW2	26S Proteasome Non-Atpase Regulatory Subunit 1	27.4567	29.2159
RXN23653.1	A0A498MUZ4	Far Upstream Element-Binding 3-Like Isoform X1	28.5123	33.4423
RXN24610.1	A0A498MV63	Vitelline Membrane Outer Layer 1-Like Protein	25.5469	21.668
RXN23743.1	A0A498MV71	Micos Complex Subunit Mic60-Like Isoform X2	30.9027	29.6523
RXN23783.1	A0A498MVA6	Toll-Interacting	26.2862	26.6366
RXN14111.1	A0A498MVA7	Pyruvate Dehydrogenase (Acetyl-Transferring) Kinase Isozyme Mito	24.9212	25.5771
RXN26671.1	A0A498MVB5	Ribosomal S6 Kinase Alpha-3 Isoform X1	24.455	27.3647
RXN20737.1	A0A498MVB8	E3 Ubiquitin- Ligase Hectd1 Isoform X1	20.9681	22.8877
RXN24481.1	A0A498MVF3	Methylcrotonoyl- Carboxylase Subunit Mitochondrial	29.7051	25.7067
RXN20777.1	A0A498MVG0	Patched -Like Protein	26.8884	27.4154
RXN20797.1	A0A498MVI3	Mitochondrial Import Inner Membrane Translocase Subunit Tim44-Li	26.8423	25.4749
RXN17150.1	A0A498MVQ1	L-Isoaspartated-Aspartate O-Methyltransferase	25.8791	27.8433
RXN24840.1	A0A498MVQ4	Redox-Regulatory Protein Fam213A	22.7754	26.6622
RXN30591.1	A0A498MVT9	Phosphoserine Aminotransferase	23.8996	28.6864
RXN22336.1	A0A498MVV7	Ras-Related Rab-7A	29.2362	29.4596
RXN23792.1	A0A498MVY7	Myosin Regulatory Light Chain Smooth Muscle Minor Isoform-Like P	22.1101	26.4924
RXN26239.1	A0A498MW04	Tubulointerstitial Nephritis Antigen-Like Protein	27.142	31.5103
RXN23812.1	A0A498MW07	Endoplasmic Reticulum-Golgi Intermediate Compartment 1	23.579	27.3774
RXN24621.1	A0A498MW09	Asparagine--Trna Cytoplasmic	23.9307	29.307
RXN26249.1	A0A498MW15	Digestive Cysteine Ase 2-Like Protein	26.5844	30.2892
RXN34048.1	A0A498MW18	60S Ribosomal L22	29.8352	28.3152
RXN05389.1	A0A498MW39	Proteasome Subunit Alpha Type-2	23.4811	24.8057
RXN21077.1	A0A498MWA8	Chymotrypsin A-Like Protein	24.0629	27.8156
RXN20955.1	A0A498MWD3	Ras-Related Rab-35	21.6798	20.5771
RXN26218.1	A0A498MWD6	Collagen Alpha-2(I) Chain-Like Protein	29.3491	32.4647
RXN26339.1	A0A498MWE6	Nuclear Factor Erythroid 2-Related Factor 1-Like Protein	23.3842	25.1344
RXN26258.1	A0A498MWH4	Fatty Acid-Binding Heart-Like Protein	28.7547	29.0966
RXN24841.1	A0A498MWJ6	Redox-Regulatory Protein Fam213A	22.525	25.7777
RXN23904.1	A0A498MWR2	Serine Threonine- Phosphatase 2A 65 Kda Regulatory Subunit A Bet	29.0078	31.1361
RXN21167.1	A0A498MWT1	Lsm14 -Like Protein	33.6387	37.762
RXN26499.1	A0A498MWU9	Nuclear Pore Complex Protein Nup153-Like Isoform X2	21.7139	25.7139
RXN25260.1	A0A498MWX7	Vimentin	28.9963	26.8477
RXN21205.1	A0A498MX24	Tetratricopeptide Repeat 37	21.4948	24.4663
RXN22786.1	A0A498MX37	Cold-Inducible Rna-Binding -Like Protein	26.701	33.9237
RXN26498.1	A0A498MX46	Transcription Elongation Factor B Polypeptide 3-Like Protein	25.55	27.8206
RXN26639.1	A0A498MX93	Enoyl- Delta Isomerase Mitochondrial-Like Isoform X1	29.0743	28.3507
RXN21317.1	A0A498MXB4	14-3-3 Eta	25.3066	28.5413
RXN26568.1	A0A498MXB6	E3 Ubiquitin- Ligase Ubr7	22.5111	21.5845
RXN24242.1	A0A498MXB9	Alpha-Actinin-4 Isoform X2	30.4678	32.8205
RXN22906.1	A0A498MXE5	Dna-(Apurinic Or Apyrimidinic Site) Lyase Isoform X2	26.8677	27.8994
RXN26699.1	A0A498MXF2	Dna Repair Rad50	21.5621	22.7158
RXN21367.1	A0A498MXH8	Sarcosine Mitochondrial	27.8757	29.7397
RXN25480.1	A0A498MXI2	Nadh Dehydrogenase 1 Subunit C2	25.8692	24.7414
RXN24302.1	A0A498MXI8	Phosphoribosylformylglycinamidine Synthase	23.6612	28.6319
RXN25560.1	A0A498MXQ4	60S Ribosomal L9	30.5624	28.4433
RXN21435.1	A0A498MXQ9	Focadhesin Isoform X1	23.7584	26.6328
RXN26819.1	A0A498MXR4	Alcohol Dehydrogenase Class-3	28.5381	29.82
RXN26829.1	A0A498MXS1	Tetratricopeptide Repeat 9C	21.3636	26.8338
RXN21465.1	A0A498MXU0	Thyroid Receptor-Interacting 6-Like Isoform X1	23.4674	24.5276
RXN26879.1	A0A498MXX3	Pleckstrin Homology Domain-Containing Family M Member 2-Like Iso	30.2372	27.9609
RXN21487.1	A0A498MXY4	Serpin H1-Like Protein	22.9252	23.2614
RXN24713.1	A0A498MXZ7	Tetratricopeptide Repeat 38	24.8484	25.4665
RXN21517.1	A0A498MY23	Rna-Binding -Like Protein	24.1289	28.301
RXN25431.1	A0A498MY60	Ras-Related Rab-4A	21.8715	25.1407
RXN26898.1	A0A498MY64	Proliferation-Associated 2G4	30.1679	27.6228
RXN21595.1	A0A498MY66	Eukaryotic Initiation Factor 4A-I	30.8706	29.6382
RXN23226.1	A0A498MY97	Actin-Related 2 3 Complex Subunit 2	25.6817	26.5446
RXN24853.1	A0A498MYC4	Serine Protease Mitochondrial-Like Protein	23.7192	23.0517
RXN25810.1	A0A498MYE0	Glycogen Debranching Enzyme-Like Isoform X1	23.3133	26.8054
RXN24522.1	A0A498MYE6	Proliferating Cell Nuclear Antigen	30.2541	27.4006
RXN21617.1	A0A498MYF3	Putative Rna Polymerase Ii Nuclear Localization Slc7A6Os	21.7056	20.7704
RXN24532.1	A0A498MYF6	Zinc Transporter Zip3	22.0418	26.3938
RXN24893.1	A0A498MYG1	Proteasome Subunit Beta Type-3	28.1802	27.6666
RXN24913.1	A0A498MYH7	26S Proteasome Non-Atpase Regulatory Subunit 12	28.393	26.988
RXN27058.1	A0A498MYK7	Replication Factor C Subunit 2	26.5497	23.4318
RXN25601.1	A0A498MYM2	26S Proteasome Non-Atpase Regulatory Subunit 1	26.9947	29.9431
RXN25611.1	A0A498MYN3	Ldlr Chaperone Mesd	27.2223	25.0075
RXN25920.1	A0A498MYP0	Complement C3-Like Protein	23.7458	25.5134
RXN21657.1	A0A498MYS8	Kin Of Irre 1 Isoform X2	29.9392	21.97
RXN06848.1	A0A498MYT1	Cysteine And Histidine-Rich Domain-Containing 1	23.4767	23.2492
RXN21667.1	A0A498MYT5	Fragile X Mental Retardation Syndrome-Related 1-Like Isoform X1	25.9073	26.9501
RXN37123.1	A0A498MYU8	Mini-Chromosome Maintenance Complex-Binding Isoform X1	23.4245	26.3313
RXN26040.1	A0A498MYZ3	Isocitrate Dehydrogenase [Nad] Subunit Mitochondrial-Like Protei	22.4753	22.2284
RXN23402.1	A0A498MYZ9	Dna-Directed Rna Polymerases I And Iii Subunit Rpac1	25.7477	26.5428
RXN21747.1	A0A498MZ21	Inorganic Pyrophosphatase-Like Protein	28.2282	30.2426
RXN26685.1	A0A498MZ60	Cop9 Signalosome Complex Subunit 5	26.322	26.8046
RXN24864.1	A0A498MZ96	Ribose-5-Phosphate Isomerase	27.9304	30.3619
RXN27399.1	A0A498MZB2	F-Actin-Capping Subunit Alpha-1	28.7518	27.5317
RXN24842.1	A0A498MZB8	Sideroflexin-1-Like Protein	28.686	25.8457
RXN26180.1	A0A498MZD1	Serine Beta-Lactamase Mitochondrial Isoform X1	24.0273	28.0499
RXN26200.1	A0A498MZF4	Lyric-Like Isoform X2	23.4726	24.7583
RXN25293.1	A0A498MZH9	Splicing Factor 3A Subunit 2	22.9206	25.591
RXN24964.1	A0A498MZJ1	Ribose-Phosphate Pyrophosphokinase 1	28.0499	30.2212
RXN26260.1	A0A498MZK9	U5 Small Nuclear Ribonucleo 40 Kda	23.0596	26.0195
RXN25333.1	A0A498MZL4	2-Oxoglutarate Mitochondrial-Like Isoform X2	25.7874	23.7755
RXN26270.1	A0A498MZL6	Palmitoyl- Thioesterase 1-Like Protein	23.8848	24.0832
RXN24972.1	A0A498MZM5	Es1 Mitochondrial-Like Protein	25.9564	23.3292
RXN27388.1	A0A498MZM9	Calpain-2 Catalytic Subunit-Like Protein	24.8276	28.8193
RXN23706.1	A0A498MZN9	Dynactin Subunit 6	21.955	23.122
RXN26300.1	A0A498MZP1	Proteasome Subunit Beta Type-2	27.2814	27.4972
RXN27418.1	A0A498MZQ6	Putative Aminopeptidase Npepl1	25.8137	28.3367
RXN25383.1	A0A498MZR2	Adenylosuccinate Lyase	24.83	27.5377
RXN23746.1	A0A498MZR8	Intelectin 2	25.5925	30.3609
RXN26330.1	A0A498MZS1	3-Hydroxyisobutyrate Mitochondrial-Like Protein	25.528	25.3182
RXN23766.1	A0A498MZT6	Plastin-3	27.0649	29.1067
RXN34453.1	A0A498MZU2	Ras-Related Rab-5A	30.5962	27.7172
RXN26410.1	A0A498N001	Polyadenylate-Binding 2 Isoform X1	26.1335	28.1846
RXN26121.1	A0A498N016	60S Ribosomal L30	28.5472	29.4982
RXN22255.1	A0A498N049	Tyrosine--Trna Cytoplasmic	24.7572	28.704
RXN25162.1	A0A498N051	Nadh Dehydrogenase [Ubiquinone] Flavo Mitochondrial	27.6453	25.4289
RXN23886.1	A0A498N052	Tubulin Alpha Chain	31.5002	30.2557
RXN27689.1	A0A498N071	Ump-Cmp Kinase	22.8761	26.22
RXN23916.1	A0A498N081	Alpha-2-Macroglobulin-Like Protein	22.2301	26.8753
RXN22295.1	A0A498N086	Serine Threonine- Kinase 3	22.2105	23.3707
RXN25563.1	A0A498N090	Ubiquitin-Conjugating Enzyme E2 K	24.6181	28.529
RXN27709.1	A0A498N094	3-Ketodihydrosphingosine Reductase	22.7939	22.9499
RXN27618.1	A0A498N0B1	Calcium Uniporter Mitochondrial	25.955	24.4019
RXN25252.1	A0A498N0E6	Biliverdin Reductase A	24.061	29.8354
RXN27779.1	A0A498N0H7	Glutamate Mitochondrial-Like Protein	24.6015	25.6456
RXN25434.1	A0A498N0L3	Ras-Related Rab-1A	27.6004	26.4314
RXN27708.1	A0A498N0L6	Vacuolar Sorting-Associated 4B Isoform X1	24.2872	23.848
RXN25332.1	A0A498N0M1	Nudc Domain-Containing 3	24.6026	27.3908
RXN25342.1	A0A498N0M9	Density-Regulated Isoform X2	23.4849	26.807
RXN26640.1	A0A498N0Q6	Rho Gdp-Dissociation Inhibitor 2-Like Isoform X2	25.433	27.5481
RXN22485.1	A0A498N0S3	Deoxyribonuclease Tatdn1	22.7606	25.1416
RXN27929.1	A0A498N0X0	Polypyrimidine Tract-Binding 2-Like Isoform X2	23.5544	27.8148
RXN26780.1	A0A498N148	Heterogeneous Nuclear Ribonucleo A0-Like Protein	28.2892	30.2698
RXN22507.1	A0A498N151	Nif3 1	27.9715	26.5986
RXN26840.1	A0A498N1A7	O-Acetyl-Adp-Ribose Deacetylase Macrod1-Like Protein	26.407	28.0138
RXN25562.1	A0A498N1B2	Udp-Glucose 6-Dehydrogenase	24.8275	26.6488
RXN22607.1	A0A498N1E7	Ester Hydrolase C11Orf54-Like Protein	24.136	26.8014
RXN25592.1	A0A498N1E8	Nucleolin-Like Isoform X5	27.986	30.7863
RXN22617.1	A0A498N1F7	Gelsolin-Like Isoform X2	27.4442	29.6465
RXN24396.1	A0A498N1H1	Exonuclease 3 -5 Domain-Containing 2-Like Protein	24.7591	20.9883
RXN28139.1	A0A498N1H3	Ubiquitin Carboxyl-Terminal Hydrolase 5 Isoform X1	27.1872	29.9369
RXN22647.1	A0A498N1I4	Mitochondrial-Processing Peptidase Subunit Alpha	25.3869	24.0347
RXN27000.1	A0A498N1R8	Dna Polymerase Delta Subunit 3-Like Isoform X2	22.5648	24.7508
RXN27010.1	A0A498N1T0	Cullin-5-Like Isoform X2	22.4562	26.8074
RXN22787.1	A0A498N1W8	Yjef N-Terminal Domain-Containing 3-Like Protein	29.382	24.1852
RXN26771.1	A0A498N1X7	Alpha Cardiac Muscle 1	34.0855	36.3933
RXN22905.1	A0A498N1Z5	Putative Trna N6-Adenosine Threonylcarbamoyltransferase	23.0362	24.9876
RXN26163.1	A0A498N201	Heterogeneous Nuclear Ribonucleo Q-Like Isoform X1	24.4234	28.0168
RXN27100.1	A0A498N206	4F2 Cell-Surface Antigen Heavy Chain-Like Protein	28.014	27.921
RXN03972.1	A0A498N211	Glyoxylate Reductase Hydroxypyruvate Reductase-Like Protein	26.7597	26.2225
RXN28369.1	A0A498N220	Signal Recognition Particle Subunit Srp72-Like Protein	25.695	31.9489
RXN26203.1	A0A498N232	Fermitin Family -Like Protein	22.151	28.6344
RXN28218.1	A0A498N236	Elongation Factor 1-Alpha-Like Protein	36.5372	40.9101
RXN25902.1	A0A498N260	Complement C3-Like Protein	26.6724	27.6784
RXN27190.1	A0A498N2C4	Aldehyde Dehydrogenase Family 3 Member B1-Like Protein	24.1448	26.7063
RXN27200.1	A0A498N2D4	Neuronal-Specific Septin-3-Like Isoform X1	21.1911	25.2562
RXN08123.1	A0A498N2G5	Rna Polymerase Ii-Associated 3	23.2096	27.4324
RXN08132.1	A0A498N2H4	Trna-Splicing Ligase-Like Protein	30.9313	34.7863
RXN25954.1	A0A498N2K6	Collagen Alpha-1(I) Chain-Like Protein	28.6271	30.7913
RXN25964.1	A0A498N2L8	Camp-Dependent Kinase Type I-Alpha Regulatory Subunit	23.5238	26.4022
RXN23017.1	A0A498N2N2	Atp-Dependent 6- Liver Type-Like Protein	27.5946	29.0977
RXN24786.1	A0A498N2P6	Core Histone Macro	24.6076	26.6822
RXN28488.1	A0A498N2T4	Heat Shock 70 Kda 4-Like Protein	25.2778	29.3523
RXN23255.1	A0A498N326	Sorting Nexin-9-Like Isoform X1	22.1236	26.9949
RXN24956.1	A0A498N369	Stress-70 Mitochondrial	31.6718	31.5076
RXN26272.1	A0A498N372	Elongation Factor 1-Alpha	34.1359	36.9346
RXN28628.1	A0A498N377	Signal Recognition Particle 19 Kda	23.3988	28.8097
RXN28859.1	A0A498N3A5	Sun Domain-Containing 1-Like Isoform X1	22.5804	25.3334
RXN28869.1	A0A498N3B1	Band 3 Anion Exchange -Like Protein	29.7855	27.8595
RXN26312.1	A0A498N3B3	60S Ribosomal L14	30.9197	30.1935
RXN26322.1	A0A498N3C5	39S Ribosomal Mitochondrial	27.5059	24.2741
RXN23267.1	A0A498N3E3	Methylmalonyl- Mitochondrial	27.3548	29.2738
RXN26244.1	A0A498N3E4	Acidic Leucine-Rich Nuclear Phospho 32 Family Member E Isoform X	24.2941	26.2624
RXN28909.1	A0A498N3E7	Lysosome-Associated Membrane Glyco 1-Like Protein	24.9878	22.8691
RXN28708.1	A0A498N3F6	Microtubule-Associated 1B-Like Protein	24.0153	28.9483
RXN28929.1	A0A498N3G7	60S Ribosomal L8	32.3102	30.4122
RXN26274.1	A0A498N3H4	60S Ribosomal L11	31.1386	29.2311
RXN28728.1	A0A498N3H6	Calpain Small Subunit 1-Like Protein	22.4971	26.3441
RXN04990.1	A0A498N3I9	Synaptobrevin -Like Protein	22.8941	25.4316
RXN27331.1	A0A498N3J3	Gem-Associated 2-Like Protein	24.6689	24.383
RXN26392.1	A0A498N3J9	Voltage-Dependent Anion-Selective Channel 2-Like Isoform X2	23.3251	27.4516
RXN27351.1	A0A498N3L1	Saccharopine Dehydrogenase-Like Oxidoreductase	26.5357	26.9495
RXN27361.1	A0A498N3M1	Galectin-3-Like Isoform X2	26.3241	31.1949
RXN26783.1	A0A498N3N1	Magnesium Transporter Nipa2-Like Protein	20.6121	24.8784
RXN26344.1	A0A498N3P9	Transformer-2 -Like Protein	22.5522	23.8459
RXN26209.1	A0A498N3S0	Eukaryotic Translation Initiation Factor 3 Subunit J-A-Like Prot	24.7267	24.2085
RXN27461.1	A0A498N3W7	Pre-Mrna-Splicing Factor Syf1	21.6373	22.5894
RXN29109.1	A0A498N3Z6	Pdz And Lim Domain 7 Isoform X2	23.5226	24.6309
RXN29149.1	A0A498N439	Putative Trna(His) Guanylyltransferase	23.9301	25.0152
RXN23655.1	A0A498N471	Dynamin 1A Isoform X8	23.8238	26.6912
RXN23557.1	A0A498N487	Sarcolemmal Membrane-Associated -Like Isoform X1	28.2171	28.5359
RXN28928.1	A0A498N489	Atp-Dependent Rna Helicase An3 Isoform X11	26.2162	31.1329
RXN23725.1	A0A498N4C6	Tropomodulin-2-Like Protein	25.849	27.2224
RXN23745.1	A0A498N4E6	Dna-Directed Rna Polymerase I Subunit Rpa1	25.735	26.4608
RXN29259.1	A0A498N4E9	Tubulin Beta-4B Chain	34.9339	31.7429
RXN26187.1	A0A498N4G1	Cop9 Signalosome Complex Subunit 2 Isoform X2	25.1644	24.8398
RXN23765.1	A0A498N4G3	Magnesium Transporter 1	26.1509	23.7444
RXN27103.1	A0A498N4H0	Peptidyl-Prolyl Cis-Trans Isomerase Fkbp2	22.3613	27.5348
RXN27701.1	A0A498N4I5	Alpha-2-Hs-Glyco -Like Protein	22.6317	27.6957
RXN27133.1	A0A498N4K0	Glutamine Gamma-Glutamyltransferase	23.8419	29.6317
RXN27721.1	A0A498N4K4	60 Kda Ss-A Ro Ribonucleo	21.837	22.9817
RXN23815.1	A0A498N4K6	Calnexin Isoform X1	27.2022	27.8102
RXN27990.1	A0A498N4L7	Eukaryotic Translation Initiation Factor 4 Gamma 3-Like Isoform	21.2029	27.8976
RXN23845.1	A0A498N4M9	Catalase	27.3941	28.5392
RXN23865.1	A0A498N4P6	Reticulon-1-A-Like Isoform X1	29.5119	28.0241
RXN26782.1	A0A498N4Q6	Glutathione Reductase-Like Isoform X1	24.5717	25.1906
RXN23727.1	A0A498N4S4	Long-Chain Specific Acyl- Mitochondrial	27.055	24.5438
RXN29148.1	A0A498N4U5	Nap -Like Protein	26.7492	26.1417
RXN26832.1	A0A498N4U7	Eh Domain-Containing 1-Like Protein	25.7982	29.0165
RXN26694.1	A0A498N4V0	Ribosome Biogenesis Regulatory-Like Protein	24.1811	26.4919
RXN26704.1	A0A498N4V8	Leucine--Trna Cytoplasmic	27.2707	28.4869
RXN28070.1	A0A498N4V9	Uridine 5 -Monophosphate Synthase	26.3559	30.3867
RXN26754.1	A0A498N514	3 (2),5 -Bisphosphate Nucleotidase 1	22.8413	25.2791
RXN29469.1	A0A498N520	Methylthioribose-1-Phosphate Isomerase	25.4812	23.9834
RXN25646.1	A0A498N525	Eukaryotic Peptide Chain Release Factor Subunit 1	27.2755	27.3903
RXN26942.1	A0A498N553	Crk	23.0259	25.6366
RXN26834.1	A0A498N589	Neutral Alpha-Glucosidase Ab-Like Isoform X2	30.146	25.692
RXN22087.1	A0A498N5C0	Flap Endonuclease 1	24.1391	21.8711
RXN26894.1	A0A498N5D6	Polynucleotide 5 -Hydroxyl-Kinase Nol9-Like Protein	20.739	22.8733
RXN26680.1	A0A498N5G5	Nadh Dehydrogenase [Ubiquinone] 1 Beta Subcomplex Subunit 4-Like	26.1481	24.6274
RXN29629.1	A0A498N5G6	60S Ribosomal L36A	27.8481	25.5325
RXN27042.1	A0A498N5G7	Centromere Kinetochore Zw10-Like Protein	25.0172	26.2131
RXN25806.1	A0A498N5I5	Odr-4-Like Protein	23.968	21.8471
RXN25826.1	A0A498N5K0	Pancreatic Alpha-Amylase-Like Protein	22.3847	27.5516
RXN27102.1	A0A498N5N1	Pyruvate Mitochondrial-Like Protein	28.2584	28.2292
RXN28370.1	A0A498N5P4	Signal Recognition Particle Subunit Srp72-Like Protein	24.6494	29.3237
RXN29468.1	A0A498N5R4	Rna-Binding Luc7-Like 1	23.5474	24.965
RXN29769.1	A0A498N5U1	Isoleucine--Trna Mitochondrial-Like Protein	27.9388	26.0393
RXN29789.1	A0A498N5V9	Seleno N	22.3791	24.2468
RXN29518.1	A0A498N5W5	Nuclear Fragile X Mental Retardation-Interacting 1	21.9084	24.8615
RXN29528.1	A0A498N5X4	Putative Ubiquitin Carboxyl-Terminal Hydrolase Faf-X Isoform X3	22.7362	23.6441
RXN27114.1	A0A498N600	Dipeptidyl Peptidase 3-Like Isoform X1	25.1348	30.7969
RXN26026.1	A0A498N629	Arginine--Trna Cytoplasmic	26.7418	23.6125
RXN29889.1	A0A498N637	Importin-5	27.9273	29.7272
RXN28301.1	A0A498N651	Neutral And Basic Amino Acid Transport Rbat	24.4141	21.914
RXN27192.1	A0A498N662	Histone-Arginine Methyltransferase Carm1	22.4357	26.9781
RXN27194.1	A0A498N670	Mitochondrial Import Inner Membrane Translocase Subunit Tim29-Li	24.7764	20.6504
RXN27703.1	A0A498N678	Profilin-2-Like Isoform X1	26.2929	30.336
RXN27743.1	A0A498N6B6	Ubiquitin Carboxyl-Terminal Hydrolase 14	25.8161	28.8103
RXN28371.1	A0A498N6B9	Adp-Ribosylation Factor 9	25.2292	24.0151
RXN27262.1	A0A498N6D1	Dnaj -Like Protein	23.8375	26.7189
RXN27272.1	A0A498N6E3	Cleavage And Polyadenylation Specificity Factor Subunit 6 Isofor	24.0266	26.3785
RXN27264.1	A0A498N6E6	Ubiquitin-Conjugating Enzyme E2 N	26.9091	30.897
RXN24495.1	A0A498N6F7	Beta-Centractin	27.954	26.1026
RXN27304.1	A0A498N6J0	Proteasome Subunit Beta Type-1	29.3436	28.5353
RXN28461.1	A0A498N6K7	Lys-63-Specific Deubiquitinase Brcc36	23.0028	25.0884
RXN27873.1	A0A498N6N5	Eukaryotic Translation Initiation Factor 4 Gamma 1-Like Isoform	26.6884	30.883
RXN30108.1	A0A498N6P7	Histone H1-Like Protein	24.775	27.1482
RXN28820.1	A0A498N6X4	Embryonic Polyadenylate-Binding -Like Protein	30.672	35.1506
RXN27474.1	A0A498N717	Adp-Sugar Pyrophosphatase	23.5029	25.6202
RXN28900.1	A0A498N748	Cell Division Cycle 16-Like Protein	22.8123	22.005
RXN24735.1	A0A498N767	Coactosin	23.672	29.474
RXN26426.1	A0A498N771	Double-Stranded Rna-Binding Staufen -Like Protein	26.3422	30.7053
RXN28083.1	A0A498N790	Aspartate--Trna Cytoplasmic	29.6351	29.7238
RXN28711.1	A0A498N7A4	Erlin-2-Like Isoform X1	25.1814	22.1601
RXN13954.1	A0A498N7B5	60S Acidic Ribosomal P2-Like Protein	25.086	25.3288
RXN27612.1	A0A498N7E2	Ribosomal S6 Kinase Alpha-2	24.127	26.5125
RXN28930.1	A0A498N7E8	Putative Ubiquitin Carboxyl-Terminal Hydrolase Faf-X Isoform X3	24.7564	25.763
RXN28950.1	A0A498N7G9	Mob Phocein Isoform X3	26.0511	29.9873
RXN04000.1	A0A498N7H4	Coatomer Subunit Delta-Like Protein	26.2571	29.1955
RXN27642.1	A0A498N7H5	Phosphatase 1G	22.4502	27.5223
RXN28821.1	A0A498N7K0	Charged Multivesicular Body 4B	23.2757	24.8945
RXN28841.1	A0A498N7L4	Transcription Factor Mitochondrial	27.8922	27.0592
RXN28223.1	A0A498N7N0	Cdv3 -Like Protein	26.8815	24.4923
RXN27702.1	A0A498N7P1	Proline-Rich Extensin Epr1	27.4017	23.4448
RXN04361.1	A0A498N7R3	Mimecan	21.805	26.8924
RXN30218.1	A0A498N7R7	Ras-Related Rab-21	22.2228	24.1753
RXN26636.1	A0A498N7T4	Calcium-Regulated Heat Stable 1-Like Protein	24.6212	27.6591
RXN29070.1	A0A498N7T5	Ribosyldihydronicotinamide Dehydrogenase [Quinone]-Like Protein	31.5793	30.5942
RXN28921.1	A0A498N7T6	Amine Oxidase [Flavin-Containing]	22.9453	21.7725
RXN28941.1	A0A498N7V6	Mx	28.6693	26.0496
RXN30539.1	A0A498N7Y8	Cytoplasmic 1	28.2285	27.302
RXN29001.1	A0A498N804	Ribonuclease H2 Subunit B-Like Protein	24.1076	23.6305
RXN30569.1	A0A498N817	Polymerase I And Transcript Release Factor-Like Protein	28.5207	30.5088
RXN24777.1	A0A498N834	Aldose 1-Epimerase	22.4534	20.949
RXN27874.1	A0A498N853	Transferrin Variant C	30.8401	36.5431
RXN28433.1	A0A498N898	Exosome Complex Component Rrp41	21.857	24.9743
RXN32175.1	A0A498N8A7	Eukaryotic Translation Initiation Factor 5B	26.5319	28.5157
RXN27942.1	A0A498N8B5	Vimentin	24.9902	30.7379
RXN30428.1	A0A498N8C1	Trypsin-2-Like Protein	22.2533	24.9399
RXN27952.1	A0A498N8C4	Copine-3 Isoform X1	25.2094	29.8583
RXN26836.1	A0A498N8C7	N-Terminal Kinase	20.503	24.4026
RXN26846.1	A0A498N8D7	N-Alpha-Acetyltransferase Auxiliary Subunit	24.4219	28.3049
RXN29171.1	A0A498N8E5	Ubiquitin-Conjugating Enzyme E2 D2	25.6633	26.1432
RXN28493.1	A0A498N8F6	Voltage-Dependent Anion-Selective Channel 1	29.8518	30.5787
RXN24927.1	A0A498N8H1	Mrna Export Factor	33.0784	24.5644
RXN26946.1	A0A498N8N2	60S Ribosomal L17	31.5494	28.6555
RXN26956.1	A0A498N8P1	Nad(P) Mitochondrial-Like Protein	28.0881	27.3912
RXN28613.1	A0A498N8R8	Transmembrane Emp24 Domain-Containing 7-Like Protein	25.1999	26.6412
RXN28142.1	A0A498N8T4	Triosephosphate Isomerase	29.4871	32.25
RXN25415.1	A0A498N8X6	Collagen Alpha-1(I) Chain-Like Protein	25.8329	28.5011
RXN25137.1	A0A498N908	Tropomyosin Alpha-1 Chain-Like Isoform X1	25.4547	26.1534
RXN29530.1	A0A498N949	Atp-Dependent Rna Helicase An3 Isoform X4	26.0369	28.2264
RXN29540.1	A0A498N951	Serine Mitochondrial	27.5548	23.2295
RXN25525.1	A0A498N963	Proteasome-Associated Ecm29-Like Protein	21.9442	26.1098
RXN28302.1	A0A498N968	Leucine-Rich Ppr Motif-Containing Mitochondrial	26.178	24.7383
RXN28863.1	A0A498N9A6	Ubiquinol-Cytochrome C Reductase Core Ii	28.2784	23.4517
RXN27266.1	A0A498N9D0	Periodic Tryptophan 1-Like Protein	20.7997	28.5813
RXN25357.1	A0A498N9I9	Zinc Finger Miz Domain-Containing 2 Isoform X1	29.2704	33.4148
RXN27376.1	A0A498N9L1	Eukaryotic Translation Initiation Factor 3 Subunit L	28.4272	28.174
RXN28512.1	A0A498N9P4	T-Complex 1 Subunit Zeta	30.6199	30.1964
RXN29053.1	A0A498N9Q6	S-Formylglutathione Hydrolase	25.8585	25.5736
RXN27466.1	A0A498N9T1	Leukotriene A-4 Hydrolase	27.8124	30.605
RXN28474.1	A0A498N9T2	Pdz And Lim Domain 4	23.2781	21.1805
RXN29143.1	A0A498N9W8	Elongator Complex 1 Isoform X1	23.8336	24.5544
RXN29880.1	A0A498N9Z4	Fam98A	26.1234	31.0768
RXN29890.1	A0A498NA00	Importin-5	28.4134	30.0379
RXN28662.1	A0A498NA31	Septin-8-A Isoform X1	22.7231	27.0949
RXN28672.1	A0A498NA39	Ccr4-Not Transcription Complex Subunit 3	22.9116	27.1804
RXN29253.1	A0A498NA51	Dna-Directed Rna Polymerase Ii Subunit Rpb2	22.7874	25.0322
RXN29293.1	A0A498NA79	Atp-Binding Cassette Sub-Family F Member 3	23.3236	23.9712
RXN29373.1	A0A498NAE3	Atp Synthase F(0) Complex Subunit Mitochondrial	31.9106	28.8742
RXN28802.1	A0A498NAE7	Drebrin Isoform X1	25.241	28.6398
RXN28822.1	A0A498NAG5	14-3-3 Beta Alpha-A	29.4478	31.8552
RXN25737.1	A0A498NAG6	Cullin-3	21.6005	29.0073
RXN28912.1	A0A498NAP3	Nadp-Dependent Malic Enzyme-Like Protein	21.8274	28.2286
RXN30161.1	A0A498NAP7	Endophilin-A1-Like Protein	24.0679	26.364
RXN26255.1	A0A498NAQ7	Programmed Cell Death 6-Interacting -Like Isoform X2	28.2527	30.1639
RXN28932.1	A0A498NAQ8	Atp Synthase Subunit Mitochondrial	30.3758	28.926
RXN28952.1	A0A498NAS7	Splicing Factor 3B Subunit 1 Isoform X1	20.6721	24.5847
RXN26345.1	A0A498NAX1	Insulin-Like Growth Factor 2 Mrna-Binding 3 Isoform X2	32.737	36.7318
RXN29072.1	A0A498NB21	Ribulose-Phosphate 3-Epimerase	22.3688	25.5943
RXN26425.1	A0A498NB24	Double-Stranded Rna-Binding Staufen -Like Protein	25.0815	28.5779
RXN29074.1	A0A498NB91	Collagen Alpha-3(Vi) Chain-Like Protein	31.0385	34.0376
RXN29084.1	A0A498NBA5	Nadh Dehydrogenase [Ubiquinone] 1 Alpha Subcomplex Subunit Mitoc	32.0629	25.0252
RXN29242.1	A0A498NBD6	60 Kda Heat Shock Mitochondrial	33.0111	32.4956
RXN29793.1	A0A498NBD8	60S Ribosomal L13A	30.9207	28.983
RXN30481.1	A0A498NBE3	U6 Snrna-Associated Sm Lsm7	25.493	32.0004
RXN29803.1	A0A498NBE6	Exportin-1 Isoform X2	24.6829	29.4256
RXN29144.1	A0A498NBF1	Elongator Complex 1-Like Protein	22.3649	25.2486
RXN29154.1	A0A498NBG2	Heterogeneous Nuclear Ribonucleo A B-Like Protein	26.0188	28.1991
RXN30520.1	A0A498NBH4	Thioredoxin Domain-Containing 5	32.6961	29.1642
RXN26247.1	A0A498NBJ4	Proteasome Subunit Beta Type-4	27.7508	26.6458
RXN29224.1	A0A498NBL9	Farnesyltransferase Geranylgeranyltransferase Type-1 Subunit Alp	23.6175	26.7413
RXN29943.1	A0A498NBQ9	Bifunctional Purine Biosynthesis Purh	30.8358	33.5165
RXN26765.1	A0A498NBU2	26S Protease Regulatory Subunit 10B	29.9728	28.7569
RXN26805.1	A0A498NBW5	Cleavage Stimulation Factor Subunit 2 Isoform X1	24.9875	27.8614
RXN28406.1	A0A498NBX9	40S Ribosomal S6	31.8573	28.3738
RXN26845.1	A0A498NBY8	Calphotin-Like Isoform X1	28.0078	24.1037
RXN26447.1	A0A498NBZ6	Interleukin Enhancer-Binding Factor 2	24.6846	26.8392
RXN28466.1	A0A498NC16	Nadh Dehydrogenase [Ubiquinone] 1 Alpha Subcomplex Subunit 2	23.4704	25.0318
RXN29434.1	A0A498NC19	Aminoacyl Trna Synthase Complex-Interacting Multifunctional 2-Li	27.9994	27.3961
RXN28526.1	A0A498NC47	Nudc Domain-Containing 1	26.8372	25.1347
RXN29504.1	A0A498NC63	Dynactin Subunit 2 Isoform X2	26.958	27.715
RXN28576.1	A0A498NC79	Proline Dehydrogenase Mitochondrial-Like Protein	25.0752	22.5983
RXN29702.1	A0A498NC84	Dynactin Subunit 1-Like Isoform X1	26.4996	26.8315
RXN26617.1	A0A498NCA7	A-Kinase Anchor 12-Like Isoform X1	21.4651	28.9196
RXN36408.1	A0A498NCC9	60S Ribosomal L23A	32.0695	28.0219
RXN28686.1	A0A498NCF3	60S Acidic Ribosomal P0	32.0994	29.7772
RXN30393.1	A0A498NCF8	Testis-Expressed Sequence 10	22.8944	24.6819
RXN26777.1	A0A498NCK2	Casein Kinase I Isoform X4	23.192	24.8539
RXN29784.1	A0A498NCN4	Hydroxymethylglutaryl- Mitochondrial-Like Isoform X1	22.7618	23.0606
RXN28836.1	A0A498NCP9	Tubulin Beta-1 Chain	30.964	34.1981
RXN28866.1	A0A498NCS2	Speckle Targeted Pip5K1A-Regulated Poly(A) Polymerase Isoform X1	25.7479	31.8279
RXN30613.1	A0A498NCT8	Neutral Alpha-Glucosidase Ab-Like Isoform X1	28.427	27.8474
RXN29944.1	A0A498NCX8	Fibronectin-Like Isoform X2	25.6881	28.93
RXN30122.1	A0A498NCY2	Filamin-C-Like Isoform X2	24.4239	22.9977
RXN27047.1	A0A498NCZ9	Neural Cell Adhesion Molecule 1-Like Isoform X7	20.8795	28.4667
RXN27107.1	A0A498ND29	Rna-Binding Lark-Like Protein	23.7437	28.3069
RXN29136.1	A0A498ND70	60S Ribosomal L26	30.1817	27.0607
RXN29156.1	A0A498ND79	Heterogeneous Nuclear Ribonucleo H-Like Isoform X1	25.0227	27.1912
RXN27337.1	A0A498NDE3	Proteasome Subunit Alpha Type-6	30.6666	29.6389
RXN27825.1	A0A498NDH5	Inhibitor Of Nuclear Factor Kappa-B Kinase Subunit Alpha	25.1507	27.0999
RXN29356.1	A0A498NDI4	Inosine-5 -Monophosphate Dehydrogenase 2 Isoform X1	26.2116	28.1133
RXN30384.1	A0A498NDJ7	Golgi-Associated Plant Pathogenesis-Related 1	24.1424	22.9325
RXN30524.1	A0A498NDR4	Lower Subunit-Like Protein	28.6725	28.0916
RXN27637.1	A0A498NDS9	Adipocyte Plasma Membrane-Associated	26.7494	28.5488
RXN29656.1	A0A498NDX1	Upf0696 C11Orf68-Like Protein	24.8575	29.1123
RXN27817.1	A0A498NDY9	Erlin-1	28.853	25.9333
RXN14299.1	A0A498NE56	Camp-Dependent Kinase Catalytic Subunit Beta Isoform X2	26.8003	22.9333
RXN28067.1	A0A498NE60	Nucleoporin Nup53-Like Protein	25.7315	23.1873
RXN28495.1	A0A498NE74	S-Phase Kinase-Associated 1	24.335	24.9533
RXN30176.1	A0A498NED4	Sgt1 -Like Protein	25.5131	24.4085
RXN30186.1	A0A498NED7	Eukaryotic Translation Initiation Factor 3 Subunit M	27.5473	22.4222
RXN30396.1	A0A498NEK6	Endoplasmic Reticulum Resident 44	27.9505	26.7408
RXN29105.1	A0A498NEQ6	Fas-Associated Factor 2	23.9765	21.0887
RXN28797.1	A0A498NER6	Dna-Directed Rna Polymerase Iii Subunit Rpc4	22.5742	23.752
RXN29165.1	A0A498NES3	Histidine--Trna Cytoplasmic Isoform X1	26.0206	26.4165
RXN29205.1	A0A498NET5	Glucosamine-6-Phosphate Isomerase 2	22.1242	28.7676
RXN29225.1	A0A498NEU1	Glutathione S-Transferase P	26.8475	29.241
RXN29007.1	A0A498NEW2	Ring Finger 17	25.6033	31.3059
RXN29097.1	A0A498NEX9	Translin	24.2911	28.3542
RXN29505.1	A0A498NF02	Methionine--Trna Cytoplasmic Isoform X1	26.8614	28.1344
RXN29635.1	A0A498NF29	Protein Kiaa2022-Like	24.3191	28.6071
RXN29407.1	A0A498NF37	Peroxisome Proliferator-Activated Receptor Delta-Like Protein	32.7115	29.5744
RXN29487.1	A0A498NF52	Small Nuclear Ribonucleo -Associated S B And B	26.726	30.2942
RXN29627.1	A0A498NF81	Apoptosis-Inducing Factor Mitochondrial-Like Isoform X1	30.1359	28.6457
RXN29667.1	A0A498NF89	Alpha- Kinase 1	22.9983	27.1205
RXN29767.1	A0A498NFA7	Serine Threonine- Phosphatase Pp1-Beta Catalytic Subunit	25.5932	25.1794
RXN29797.1	A0A498NFB1	Utp--Glucose-1-Phosphate Uridylyltransferase Isoform X1	29.6327	29.4586
RXN30125.1	A0A498NFE0	Vacuolar Sorting-Associated 4A	24.3143	26.761
RXN30067.1	A0A498NFF7	Glucose-6-Phosphate Isomerase-Like Protein	29.8011	32.2643
RXN22754.1	A0A498NFT9	Nitrogen Permease Regulator 3 Isoform X2	21.5028	33.3612
RXN30726.1	A0A498NFX0	Helicase-Like Transcription Factor Isoform X1	21.6365	27.3429
RXN07072.1	A0A498NG15	Pescadillo-Like Protein	22.9191	22.1719
RXN30806.1	A0A498NG47	Phosphatidylethanolamine-Binding 1	27.6908	33.7995
RXN30836.1	A0A498NG76	Golgin Subfamily A Member 3-Like Isoform X1	29.2955	32.9509
RXN30879.1	A0A498NGB7	Coronin-1C Isoform X1	25.9672	29.8351
RXN30902.1	A0A498NGC9	Glucose-6-Phosphate 1-Dehydrogenase Isoform X3	25.6329	31.3737
RXN37462.1	A0A498NGF1	2-Methoxy-6-Polyprenyl-1,4-Benzoquinol Mitochondrial	27.2715	26.0799
RXN30930.1	A0A498NGG1	Putative Atp-Dependent Rna Helicase Ddx23	21.0054	26.695
RXN30834.1	A0A498NGG7	Serine Threonine- Phosphatase Mitochondrial Isoform X1	26.7654	25.3996
RXN30936.1	A0A498NGH7	Udp-Glucose:Glyco Glucosyltransferase 1-Like Isoform X2	27.3467	25.4001
RXN30962.1	A0A498NGI1	Arginine N-Methyltransferase 5	26.9023	29.4369
RXN31002.1	A0A498NGM2	Atp Synthase Subunit Mitochondrial	35.069	32.5721
RXN31012.1	A0A498NGN3	60S Ribosomal L28	30.2041	28.7969
RXN31009.1	A0A498NGP6	26S Proteasome Non-Atpase Regulatory Subunit 5	25.6818	27.9949
RXN31015.1	A0A498NGP9	Transport Sec16A-Like Isoform X1	23.1938	23.4031
RXN31020.1	A0A498NGQ1	Heterogeneous Nuclear Ribonucleo K-Like Isoform X1	25.1265	23.0889
RXN31008.1	A0A498NGQ8	26S Proteasome Non-Atpase Regulatory Subunit 5	23.4201	26.1938
RXN31038.1	A0A498NGU3	Histone H1-Like Protein	21.6856	26.9516
RXN31093.1	A0A498NGW6	Dual Specificity Mitogen-Activated Kinase Kinase 2	26.2542	26.4383
RXN31167.1	A0A498NHG3	Dolichyl-Diphosphooligosaccharide-- Glycosyltransferase Subunit	30.9312	29.7589
RXN31291.1	A0A498NHJ6	Dna-Directed Rna Polymerase Iii Subunit Rpc5	21.4499	24.3605
RXN31363.1	A0A498NHN2	Disulfide-Isomerase A5	29.2499	26.4968
RXN31370.1	A0A498NHP2	Mki67 Fha Domain-Interacting Nucleolar Phospho	26.9318	26.0384
RXN31379.1	A0A498NHT1	Sorting Nexin-4	23.9955	25.2376
RXN31391.1	A0A498NHU6	3-Hydroxyisobutyryl- Mitochondrial	27.4631	24.9072
RXN31470.1	A0A498NHY4	3-Ketoacyl- Mitochondrial	32.6806	28.1561
RXN31473.1	A0A498NHZ1	Set-Like Isoform X2	28.1611	29.2766
RXN31451.1	A0A498NI01	Somatomedin-B And Thrombospondin Type-1 Domain-Containing -Like	25.1146	25.9021
RXN31469.1	A0A498NI12	Dynein Light Chain Cytoplasmic	28.5372	35.5061
RXN31448.1	A0A498NI15	Heparin Cofactor 2	21.2829	26.5884
RXN31458.1	A0A498NI22	Voltage-Dependent Anion-Selective Channel 2-Like Isoform X2	30.3351	29.9362
RXN31367.1	A0A498NI83	Signal Transducing Adapter Molecule 2	23.5892	25.8647
RXN31559.1	A0A498NIA6	Multivesicular Body Subunit 12B-Like Protein	21.5873	23.3269
RXN31622.1	A0A498NIB6	Aspartyl Asparaginyl Beta-Hydroxylase Isoform X3	23.2809	23.7918
RXN31630.1	A0A498NIC6	Kinesin Kif20A Isoform X1	28.6478	27.91
RXN37225.1	A0A498NIE7	Elastase-1-Like Protein	22.65	24.3926
RXN31710.1	A0A498NIH7	T-Complex 1 Subunit Gamma	30.9205	30.1856
RXN31507.1	A0A498NIJ4	Cop9 Signalosome Complex Subunit 1	23.5448	27.9485
RXN31681.1	A0A498NIK2	Cell Division Control 42-Like Protein	24.3936	26.1282
RXN31686.1	A0A498NIQ5	Mucin-2-Like Isoform X2	24.5791	28.0725
RXN31669.1	A0A498NIQ8	Rwd Domain-Containing 1	24.7879	25.7921
RXN31679.1	A0A498NIR7	40S Ribosomal S9	31.4242	29.5766
RXN31840.1	A0A498NIT8	Rap1 Gtpase-Gdp Dissociation Stimulator 1 Isoform X1	25.615	24.5483
RXN31709.1	A0A498NIU6	Disulfide-Isomerase A3-Like Protein	28.4051	30.2728
RXN31778.1	A0A498NIW4	Zona Pellucida Sperm-Binding 3-Like Protein	35.818	28.8767
RXN31674.1	A0A498NIZ5	Glutathione S-Transferase Kappa 1-Like Protein	23.5615	23.7666
RXN31833.1	A0A498NJ04	Ubiquitin Carboxyl-Terminal Hydrolase 10-Like Isoform X2	24.5776	26.4899
RXN31902.1	A0A498NJ09	Putative Atp-Dependent Rna Helicase Ddx49	24.3816	32.2148
RXN31815.1	A0A498NJ12	60S Ribosomal L13	32.7715	28.5396
RXN31920.1	A0A498NJ14	Daz-Associated 1-Like Isoform X2	29.3735	27.7875
RXN31835.1	A0A498NJ31	Ap-1 Complex Subunit Gamma-1 Isoform X1	23.0644	27.8012
RXN31950.1	A0A498NJ41	Isoleucine--Trna Cytoplasmic	28.585	29.2792
RXN31891.1	A0A498NJ63	Transcription Factor Btf3 -Like Protein	21.9744	25.7042
RXN31707.1	A0A498NJ74	Lamin-A-Like Protein	27.1598	30.2378
RXN31972.1	A0A498NJ76	Cellular Nucleic Acid-Binding -Like Protein	26.5419	30.8607
RXN31754.1	A0A498NJ80	Hypothetical Protein	25.3293	29.0533
RXN31895.1	A0A498NJ86	Gamma-Taxilin-Like Isoform X1	21.5458	28.4205
RXN31849.1	A0A498NJ90	26S Proteasome Non-Atpase Regulatory Subunit 7	29.261	27.7098
RXN31905.1	A0A498NJ95	La-Related 6-Like Protein	25.468	26.3769
RXN32010.1	A0A498NJ99	Ctd Small Phosphatase 2 Isoform X2	27.908	24.9048
RXN31896.1	A0A498NJB3	Histone-Binding Rbbp7 Isoform X1	25.341	25.3535
RXN31951.1	A0A498NJC2	Isoleucine--Trna Cytoplasmic	26.5846	27.2298
RXN31973.1	A0A498NJD5	Pre-Mrna-Splicing Factor Isy1-Like Protein	21.2622	25.9367
RXN31926.1	A0A498NJE4	Upf0160 Mitochondrial	27.6259	28.6451
RXN32060.1	A0A498NJE7	Sentrin-Specific Protease 3-Like Protein	26.7515	24.7619
RXN32052.1	A0A498NJF0	Trna (Uracil-5-)-Methyltransferase -Like Protein	21.4175	26.4711
RXN32070.1	A0A498NJF9	Pyruvate Dehydrogenase E1 Component Subunit Mitochondrial-Like I	29.8608	25.6576
RXN32011.1	A0A498NJI2	Serine Arginine-Rich Splicing Factor 6-Like Protein	24.0935	29.1697
RXN32005.1	A0A498NJJ6	Wd Repeat-Containing 18	24.2617	27.271
RXN02528.1	A0A498NJK1	Eukaryotic Translation Initiation Factor 3 Subunit D	28.935	28.3917
RXN32140.1	A0A498NJN0	Carbonyl Reductase [Nadph] 1-Like Protein	25.2119	29.032
RXN32071.1	A0A498NJP2	Ribosomal S6 Kinase Alpha-3-Like Protein	25.0211	27.0613
RXN32036.1	A0A498NJQ3	Annexin A1-Like Protein	29.0965	29.8969
RXN31887.1	A0A498NJQ6	Atp Synthase Subunit Mitochondrial	35.3382	32.3463
RXN31897.1	A0A498NJR7	Ap-1 Complex Subunit Sigma-2-Like Protein	24.59	25.6855
RXN31984.1	A0A498NJV8	Acyl-Coenzyme A Thioesterase 8	24.832	20.9267
RXN32153.1	A0A498NJV9	Calcium-Binding 39-Like Protein	22.3073	27.8431
RXN32054.1	A0A498NK32	Nucleolysin Tia-1-Like Isoform X1	27.6989	28.2749
RXN32233.1	A0A498NK36	Cleavage And Polyadenylation Specificity Factor Subunit 2	23.936	29.3295
RXN32228.1	A0A498NK38	V-Type Proton Atpase Subunit D	25.9986	27.4828
RXN32238.1	A0A498NK49	Collagen Alpha-1(Xii) Chain-Like Protein	27.6798	30.7653
RXN32310.1	A0A498NK57	26S Protease Regulatory Subunit 6B	30.1441	27.5252
RXN32258.1	A0A498NK69	Ras-Related Rab-10	25.7388	26.4669
RXN32273.1	A0A498NK70	Transmembrane Emp24 Domain-Containing 10	26.4436	28.005
RXN32047.1	A0A498NK81	Ap-1 Complex Subunit Beta-1 Isoform X4	25.8473	29.8815
RXN32255.1	A0A498NK83	Trifunctional Enzyme Subunit Mitochondrial	31.7389	30.3403
RXN32400.1	A0A498NKD0	Receptor-Type Tyrosine- Phosphatase Alpha	28.6224	21.9349
RXN32174.1	A0A498NKE3	Importin Subunit Alpha-4	23.1498	27.565
RXN32057.1	A0A498NKE4	V-Type Proton Atpase Catalytic Subunit A	23.4601	30.4574
RXN32412.1	A0A498NKF0	Vacuolar Sorting-Associated 29 Isoform X2	24.1299	24.571
RXN26922.1	A0A498NKF8	Gelsolin-Like Isoform X2	27.5717	31.006
RXN32318.1	A0A498NKH6	Ribonuclease P Subunit P25	22.7219	27.5139
RXN32413.1	A0A498NKJ5	Gpn-Loop Gtpase 3	23.0817	27.0746
RXN32234.1	A0A498NKK1	Bifunctional Lysine-Specific Demethylase And Histidyl-Hydroxylas	24.4988	25.0124
RXN12750.1	A0A498NKL6	Complement Component 1 Q Subcomponent-Binding Mitochondrial	30.6154	27.8402
RXN32415.1	A0A498NKL7	Sarcoplasmic Endoplasmic Reticulum Calcium Atpase 2	25.7024	27.9546
RXN32254.1	A0A498NKM0	Trifunctional Enzyme Subunit Mitochondrial-Like Protein	30.7183	31.6045
RXN32147.1	A0A498NKN5	1-Acyl-Sn-Glycerol-3-Phosphate Acyltransferase Gamma-Like Isofor	24.8686	21.105
RXN32421.1	A0A498NKN9	Erythrocyte Band 7 Integral Membrane -Like Isoform X2	28.7675	29.3018
RXN32274.1	A0A498NKP3	Translation Initiation Factor Eif-2B Subunit Beta	25.7953	26.1621
RXN32463.1	A0A498NKP4	Corticosteroid-Binding Globulin-Like Protein	23.3176	25.9048
RXN32399.1	A0A498NKS6	Glutathione S-Transferase Theta-1-Like Protein	26.1118	26.6028
RXN32324.1	A0A498NKU3	Chondroitin Sulfate Proteoglycan 5-Like Isoform X1	29.5656	32.9355
RXN32227.1	A0A498NKW3	Eukaryotic Translation Initiation Factor 2 Subunit 1	27.2018	26.5955
RXN32563.1	A0A498NKZ2	Cadherin-4-Like Isoform X1	22.1126	28.6536
RXN32277.1	A0A498NL15	Dna Repair Rad51 -Like Protein	23.8691	24.9025
RXN32489.1	A0A498NL18	Thioredoxin Reductase Cytoplasmic-Like Protein	26.3596	28.7269
RXN32464.1	A0A498NL75	Corticosteroid-Binding Globulin-Like Protein	22.6144	24.3974
RXN32558.1	A0A498NL76	Target Of Myb 1-Like Isoform X1	22.4724	22.3191
RXN32720.1	A0A498NL83	Collagen Alpha-6(Iv) Chain-Like Isoform X1	22.7806	29.9897
RXN32599.1	A0A498NLD2	Mitochondrial	23.213	28.4052
RXN32743.1	A0A498NLG4	Cingulin 1	21.7719	22.2549
RXN32681.1	A0A498NLG8	Peptidyl-Prolyl Cis-Trans Isomerase Nima-Interacting 1	24.7079	26.7172
RXN32437.1	A0A498NLH3	Heat Shock Beta-1-Like Protein	25.6308	28.9971
RXN32773.1	A0A498NLI9	Pelota-Like Protein	22.386	29.9891
RXN32721.1	A0A498NLK2	Collagen Alpha-5(Iv) Chain-Like Isoform X2	23.5831	30.3403
RXN32890.1	A0A498NLN5	Dna Replication Licensing Factor Mcm2	27.5489	24.1799
RXN32843.1	A0A498NLQ0	Cathepsin D-Like Protein	28.4774	28.4525
RXN32654.1	A0A498NLT2	Aminopeptidase	27.1469	28.8711
RXN32728.1	A0A498NLU9	40S Ribosomal X Isoform	32.8203	30.3819
RXN32895.1	A0A498NLX8	Intermediate Filament On3-Like Protein	24.1537	26.5968
RXN32774.1	A0A498NM47	Serine Threonine- Phosphatase Pp1-Gamma Catalytic Subunit	24.4723	26.6879
RXN31492.1	A0A498NM51	Eukaryotic Peptide Chain Release Factor Gtp-Binding Subunit Erf3	25.2814	29.4079
RXN33190.1	A0A498NMG8	Potassium Voltage-Gated Channel Subfamily H Member 6-Like Protei	24.4559	26.6782
RXN33212.1	A0A498NML0	Elav 2 Isoform X1	32.3851	35.49
RXN32832.1	A0A498NMR0	Hsc70-Interacting	27.9438	30.4684
RXN33058.1	A0A498NMR7	Nuclear Pore Complex Nup88	25.5208	24.4825
RXN31779.1	A0A498NMS2	Ste20-Related Kinase Adapter Alpha Isoform X1	20.9434	23.4831
RXN17080.1	A0A498NMU3	Regulator Of Nonsense Transcripts 1 Isoform X1	22.598	29.7669
RXN33106.1	A0A498NMV8	Integrin Alpha-3-Like Isoform X1	22.2994	23.131
RXN33108.1	A0A498NMX0	Vesicle-Fusing Atpase Isoform X1	29.248	27.962
RXN33313.1	A0A498NN34	Elongation Factor 2	33.4615	32.29
RXN33403.1	A0A498NNB9	3-Hydroxyisobutyrate Mitochondrial-Like Protein	25.5248	28.0799
RXN33530.1	A0A498NNC6	Regucalcin	24.1118	27.8104
RXN33391.1	A0A498NNJ4	Serine Threonine- Kinase 31 Isoform X1	23.6646	30.0532
RXN33533.1	A0A498NNQ1	Serum Deprivation-Response -Like Protein	23.893	27.9678
RXN33458.1	A0A498NNV5	Spindle And Kinetochore Associated Complex Subunit 3	25.3553	26.9439
RXN33501.1	A0A498NNV7	Metaxin-2 Isoform X2	25.4077	25.9602
RXN33511.1	A0A498NNW1	Succinyl- Ligase [Adp-Forming] Subunit Mitochondrial	28.6311	25.8717
RXN33468.1	A0A498NNW4	Nadh-Ubiquinone Oxidoreductase 75 Kda Mitochondrial-Like Protein	31.5186	27.9144
RXN33476.1	A0A498NNW8	Dna Replication Licensing Factor Mcm6	23.927	23.9922
RXN33541.1	A0A498NNZ3	Myosin-11-Like Isoform X1	30.7525	31.0105
RXN33459.1	A0A498NNZ4	Desmin-Like Protein	29.5477	30.3516
RXN33469.1	A0A498NP09	Elongation Factor 1-Beta	28.6419	28.9382
RXN33307.1	A0A498NP32	Phospholipid Hydroperoxide Glutathione Mitochondrial-Like Protei	22.2595	26.9472
RXN33695.1	A0A498NP39	Hypothetical Protein	21.5628	20.2869
RXN33558.1	A0A498NP43	Receptor-Type Tyrosine- Phosphatase-Like N	26.2171	27.7982
RXN33673.1	A0A498NP50	Reticulocalbin-1-Like Isoform X1	22.9247	26.4989
RXN33755.1	A0A498NP84	Heterogeneous Nuclear Ribonucleo L-Like Isoform X3	24.3128	27.7158
RXN33765.1	A0A498NP92	Delta(3,5)-Delta(2,4)-Dienoyl- Mitochondrial	28.343	25.993
RXN33387.1	A0A498NPB6	60S Ribosomal L18	30.1626	28.2974
RXN33407.1	A0A498NPD7	Putative Serine Carboxypeptidase Cpvl	24.0517	24.7945
RXN33656.1	A0A498NPF8	Xaa-Pro Aminopeptidase 1 Isoform X2	24.3026	30.8769
RXN33676.1	A0A498NPH6	Ras-Related R-Ras-Like Protein	22.395	25.5517
RXN33457.1	A0A498NPI3	Sorcin-Like Isoform X1	24.1165	26.8067
RXN33696.1	A0A498NPK0	Histone-Lysine N-Methyltransferase Setd1A-Like Isoform X1	23.7813	26.6007
RXN33761.1	A0A498NPL4	Gap Junction Delta-2 -Like Protein	22.5213	22.334
RXN33604.1	A0A498NPP7	Epimerase Family Sdr39U1	22.9024	24.1476
RXN34050.1	A0A498NPQ7	Altered Inheritance Of Mitochondria 3-Like Protein	34.6464	27.8099
RXN33738.1	A0A498NPT3	O-Glucosyltransferase 1	27.0925	24.8048
RXN34140.1	A0A498NPZ7	Flotillin-2A Isoform X1	24.1607	25.3625
RXN33829.1	A0A498NQ53	D-Aspartate Oxidase	24.1638	23.9193
RXN33677.1	A0A498NQ62	Ap-2 Complex Subunit Alpha-2-Like Isoform X5	25.8791	28.3755
RXN33898.1	A0A498NQ77	Membrane Progestin Receptor Alpha-B-Like Protein	24.739	24.9128
RXN33754.1	A0A498NQB1	Nucleolar Pre-Ribosomal-Associated 1	26.4807	28.7556
RXN33899.1	A0A498NQC1	Nuclear Migration Nudc	25.6148	29.5239
RXN34175.1	A0A498NQC9	Ubiquilin-4-Like Protein	23.733	27.0908
RXN33774.1	A0A498NQD2	Double-Strand Break Repair Mre11A	22.7533	22.2631
RXN34272.1	A0A498NQD7	Atp-Binding Cassette Sub-Family E Member 1	27.1879	28.4912
RXN34282.1	A0A498NQE6	Beta-Catenin 1	20.3162	22.1809
RXN11561.1	A0A498NQG1	Lim And Senescent Cell Antigen-Like-Containing Domain 1 Isoform	24.9441	25.2943
RXN34193.1	A0A498NQL0	Heterogeneous Nuclear Ribonucleo A B-Like Isoform X2	28.0823	29.9581
RXN34432.1	A0A498NQT4	Epiplakin-Like Protein	28.3784	30.7322
RXN34293.1	A0A498NQV2	Myosin Regulatory Light Polypeptide 9	23.6449	27.0846
RXN34333.1	A0A498NQY9	Proteasome Subunit Alpha Type-5	28.2661	29.1394
RXN34119.1	A0A498NQZ7	Threonine--Trna Cytoplasmic	26.5999	29.4817
RXN34216.1	A0A498NR10	Nucleoporin Nup188-Like Protein	22.6181	22.006
RXN34510.1	A0A498NR16	Spry Domain-Containing 4-Like Protein	22.9306	24.5241
RXN34512.1	A0A498NR22	Carnitine O-Palmitoyltransferase Mitochondrial	25.4067	27.401
RXN34306.1	A0A498NR97	Collagen Alpha-2(Vi) Chain-Like Isoform X1	29.1188	31.6729
RXN34495.1	A0A498NRA1	Leucine-Rich Repeat-Containing 47	27.3014	27.0005
RXN34515.1	A0A498NRB8	Transmembrane And Coiled-Coil Domain-Containing 1	24.2933	31.6308
RXN34513.1	A0A498NRF7	Mago Nashi-Like Protein	22.2192	25.19
RXN34431.1	A0A498NRH8	Plectin-Like Isoform X4	25.2997	29.2219
RXN34167.1	A0A498NRJ2	Peptide-N4-N-Acetyl-Beta-D-Glucosaminylasparagine Amidase F Prec	25.1718	26.0708
RXN34595.1	A0A498NRK1	Fas-Associated Factor 1	24.1061	26.1705
RXN34553.1	A0A498NRK2	Oxygen-Dependent Coproporphyrinogen-Iii Mitochondrial-Like Prote	26.0375	23.6527
RXN34329.1	A0A498NRL8	U3 Small Nucleolar Rna-Interacting 2 Isoform X1	24.1767	29.8298
RXN05230.1	A0A498NRP5	Type I Cytoskeletal 13-Like Protein	26.8325	31.9382
RXN34234.1	A0A498NRR8	78 Kda Glucose-Regulated	32.0552	31.9675
RXN34665.1	A0A498NRT4	Transcription Factor Iiia-Like Protein	33.5116	38.0033
RXN34675.1	A0A498NRU2	V-Type Proton Atpase Catalytic Subunit A	27.0524	25.459
RXN34685.1	A0A498NRV1	Cystatin-B-Like Protein	24.9602	28.8874
RXN34516.1	A0A498NRW6	4-Trimethylaminobutyraldehyde Dehydrogenase	29.3516	32.657
RXN34832.1	A0A498NRX4	Phosphate Carrier Mitochondrial Isoform X1	30.7746	27.4822
RXN34715.1	A0A498NRX9	Golgi To Er Traffic 4-Like Protein	24.1105	22.4077
RXN34591.1	A0A498NRY0	Epidermal Growth Factor Receptor Substrate 15-Like Isoform X1	28.6021	29.3802
RXN34307.1	A0A498NRY6	Collagen Alpha-1(Vi) Chain	28.5407	31.9204
RXN34317.1	A0A498NS01	Guanine Nucleotide-Binding G(I) Subunit Alpha-2-Like Protein	26.3093	25.972
RXN34334.1	A0A498NS18	Synaptophysin 1	24.0586	27.4193
RXN34765.1	A0A498NS28	Integrin Beta-1-A-Like Protein	22.5615	29.0814
RXN34691.1	A0A498NS73	Glycine--Trna Ligase	26.7638	27.7107
RXN34666.1	A0A498NSE5	60S Ribosomal L21	31.016	27.8395
RXN34863.1	A0A498NSE9	Fibulin-1-Like Isoform X2	25.0679	22.7348
RXN34935.1	A0A498NSH4	Elongation Factor 1-Delta Isoform X1	27.1144	29.3301
RXN34539.1	A0A498NSH5	Vesicle-Trafficking Sec22B-B Isoform X1	24.8451	25.9236
RXN34821.1	A0A498NSJ3	Lupus La	31.1706	33.2336
RXN34965.1	A0A498NSK0	Heat Shock Hsp 90-Alpha 1	24.4679	26.756
RXN35142.1	A0A498NSN9	Developmentally-Regulated Gtp-Binding 1	28.1023	28.6501
RXN34963.1	A0A498NSP8	Zona Pellucida Sperm-Binding 4-Like Protein	36.3879	28.9977
RXN34808.1	A0A498NSQ2	Solute Carrier Organic Anion Transporter Family Member 5A1-Like	24.4131	22.7249
RXN34609.1	A0A498NSQ8	Guanine Nucleotide-Binding G(I) G(S) G(T) Subunit Beta-3-Like Pr	29.4339	30.8195
RXN35232.1	A0A498NSX2	Neuroblast Differentiation-Associated Ahnak Isoform X1	29.0321	30.6244
RXN34654.1	A0A498NT14	Acyl-Coenzyme A Thioesterase Mitochondrial-Like Isoform X2	24.6991	25.5988
RXN35292.1	A0A498NT23	Methylosome Subunit Picln	23.6612	27.3811
RXN34674.1	A0A498NT28	N-Alpha-Acetyltransferase 50 Isoform X1	22.7885	25.7128
RXN35290.1	A0A498NT33	Serine Threonine- Kinase Pak 1 Isoform X1	22.6955	25.7869
RXN28879.1	A0A498NT54	Dnaj -Like Protein	28.0149	26.2205
RXN34714.1	A0A498NT58	Dna Topoisomerase 2-Alpha	34.579	22.0533
RXN34839.1	A0A498NTA4	Heavy Subunit	26.4643	26.6512
RXN35285.1	A0A498NTD3	Calpain-5-Like Protein	23.4698	23.4495
RXN35223.1	A0A498NTD8	Transmembrane Emp24 Domain-Containing 9-Like Protein	26.7848	25.565
RXN35295.1	A0A498NTE0	40S Ribosomal S3	33.5324	30.6352
RXN35233.1	A0A498NTE8	Neuroblast Differentiation-Associated Ahnak Isoform X1	22.5962	26.6741
RXN34936.1	A0A498NTF0	Pyrroline-5-Carboxylate Reductase 3 Isoform X2	24.658	28.5842
RXN35181.1	A0A498NTF6	Heat Shock 70 Kda 4-Like Protein	26.6133	29.7454
RXN34966.1	A0A498NTH7	Heat Shock Hsp 90-Alpha	30.8809	32.893
RXN34817.1	A0A498NTJ7	Collagen Alpha-1(Xxviii) Chain-Like Protein	24.7478	25.294
RXN35231.1	A0A498NTK4	Elongation Factor 1-Gamma	31.1191	30.5268
RXN35472.1	A0A498NTL2	Elongation Factor Mitochondrial	31.0222	26.2424
RXN35016.1	A0A498NTM4	Zona Pellucida Sperm-Binding 3-Like Protein	36.7427	29.2702
RXN34857.1	A0A498NTP0	Tyrosine--Trna Mitochondrial	23.0053	22.3148
RXN35281.1	A0A498NTQ4	Eukaryotic Translation Initiation Factor 2A	29.1892	29.6846
RXN35550.1	A0A498NTT9	Alcohol Dehydrogenase [Nadp(+)] Isoform X2	27.2484	28.6562
RXN34907.1	A0A498NTU1	Peptidyl-Prolyl Cis-Trans Isomerase Fkbp3	28.6494	27.2862
RXN34964.1	A0A498NTU5	Zona Pellucida Sperm-Binding 4-Like Protein	37.8844	25.3208
RXN35660.1	A0A498NU48	Phenylalanine--Trna Ligase Beta Subunit	27.4495	28.5644
RXN35017.1	A0A498NU49	Putative Protein C15Orf52-Like Isoform X3	23.8158	28.115
RXN38287.1	A0A498NU75	Cyclin-Dependent Kinase 1	29.5551	28.4909
RXN35535.1	A0A498NU78	Plasminogen Activator Inhibitor 1 Rna-Binding -Like Isoform X1	26.3982	26.2535
RXN35236.1	A0A498NU79	Neuroblast Differentiation-Associated Ahnak Isoform X1	27.9047	30.6201
RXN35246.1	A0A498NU90	Peptidyl-Prolyl Cis-Trans Isomerase Nima-Interacting 4	20.9507	25.4959
RXN35585.1	A0A498NUC4	Putative Proline--Trna Mitochondrial	23.1985	21.1761
RXN35551.1	A0A498NUH2	Histone-Binding N1 N2-Like Isoform X1	29.1429	29.4753
RXN35249.1	A0A498NUH3	26S Proteasome Non-Atpase Regulatory Subunit 10	24.9154	29.0761
RXN35571.1	A0A498NUJ2	Phosphoglucomutase-1	27.2717	30.1037
RXN35466.1	A0A498NUW6	Phenylalanine--Trna Ligase Alpha Subunit	26.971	26.6774
RXN35354.1	A0A498NUZ0	Eukaryotic Initiation Factor 4A-Ii	24.3031	28.1228
RXN35419.1	A0A498NUZ4	T-Complex 1 Subunit Eta	29.8289	30.9493
RXN35427.1	A0A498NVD1	Pyruvate Mitochondrial-Like Protein	26.1084	25.2985
RXN35437.1	A0A498NVE1	Phospholipase A-2-Activating	26.1763	28.2817
RXN35467.1	A0A498NVH4	Interleukin Enhancer-Binding Factor 3 Isoform X1	23.5086	28.7917
RXN35808.1	A0A498NVP3	Methyltransferase 13	24.8861	29.4201
RXN11880.1	A0A498NVQ5	Annexin A13-Like Protein	25.0007	28.3044
RXN36175.1	A0A498NW20	Fact Complex Subunit Spt16	25.7407	27.2791
RXN30896.1	A0A498NW67	Pre-Mrna-Processing Factor 6	22.244	26.8103
RXN36218.1	A0A498NWT4	Histone H3	26.9052	28.3229
RXN36034.1	A0A498NX04	Gametocyte-Specific Factor 1-Like Isoform X1	21.8023	26.8334
RXN36276.1	A0A498NX57	Inorganic Pyrophosphatase-Like Protein	25.3318	29.8549
RXN36279.1	A0A498NXD1	S-Methyl-5 -Thioadenosine Phosphorylase	27.5023	31.292
RXN36925.1	A0A498NYB9	Nuclear Pore Complex Nup160	25.9706	29.7653
RXN36587.1	A0A498NZ12	Kv Channel-Interacting 2-Like Protein	23.6353	23.7803
RXN37108.1	A0A498NZ89	Ap-3 Complex Subunit Mu-1	25.1771	24.8841
RXN37285.1	A0A498NZA3	Vacuolar Sorting-Associated 4B-Like Protein	24.0861	23.901
RXN37128.1	A0A498NZA9	Pdz And Lim Domain 1	28.0247	28.4713
RXN37381.1	A0A498NZP2	Phosphotriesterase-Related	24.1086	29.5644
RXN37196.1	A0A498NZS0	Cysteine And Glycine-Rich 2	21.6491	26.6305
RXN09160.1	A0A498NZY2	Double-Stranded Rna-Binding Staufen -Like Protein	26.0102	30.0893
RXN37488.1	A0A498P0B7	Prrc2C Isoform X1	22.8054	24.6301
RXN37294.1	A0A498P165	60S Ribosomal L36	30.5529	26.0197
RXN26458.1	A0A498P1K8	Excitatory Amino Acid Transporter 2-Like Isoform X1	20.9787	21.6201
RXN38872.1	A0A498P2L1	Tubulin--Tyrosine Ligase 12	22.3829	28.3858
RXN38485.1	A0A498P2N6	Troponin Cardiac Muscle Isoforms-Like Protein	22.587	28.1771
RXN38970.1	A0A498P2U5	Glycogenin-1-Like Isoform X2	23.792	24.7669
RXN38595.1	A0A498P307	Dnaj -Like Protein	25.2101	26.0238
RXN38715.1	A0A498P3D0	Actin-Related 3	27.9369	28.109
RXN38721.1	A0A498P3E8	Ubx Domain-Containing 4	25.3575	25.0645
RXN39200.1	A0A498P3G3	Nuclear Pore Complex Nup98-Nup96-Like Protein	24.0521	23.3044
RXN38486.1	A0A498P3I9	Dynamin-1 Isoform X2	27.4258	28.431
RXN39272.1	A0A498P3L6	Calcium-Binding Mitochondrial Carrier Aralar1-Like Protein	27.6065	28.0481
RXN38823.1	A0A498P3P8	Importin-5	29.3404	30.1789
RXN38294.1	A0A498P430	Glycogen Brain Form	26.5078	29.9969
RXN30721.1	A0A498P434	Propionyl- Carboxylase Beta Mitochondrial	29.9161	27.4194
RXN38981.1	A0A498P452	Calponin-2-Like Protein	20.2047	26.6081
RXN38983.1	A0A498P454	40S Ribosomal S28	25.6463	26.9878
RXN17492.1	A0A498P4F6	Quinone Oxidoreductase	21.2895	22.3045
RXN39453.1	A0A498P5C9	Collagen Alpha-3(Vi) Chain-Like Protein	22.4759	28.2518
RXN24822.1	A0A498P5M2	Voltage-Dependent Anion-Selective Channel 2	33.8453	30.5792
RXN38989.1	A0A498P5M4	Anoctamin-8-Like Isoform X2	23.8329	27.7661
RXN39269.1	A0A498P6G7	Golgi Reassembly-Stacking 2	21.5883	25.5958
RXN39634.1	A0A498P826	Guanine Nucleotide-Binding -Like 3	21.7709	26.2622
RXN09579.1	H9C4W7	-	30.8004	27.4886
RXN05506.1	RXN05506.1	Immunoglobulin Mu Heavy Chain	25.5032	32.0924
RXN35982.1	RXN35982.1	V-Set And Immunoglobulin Domain-Containing 10-Like Isoform X1	29.9118	26.7979
RXN09588.1	V5XVB7	-	26.0185	21.7625
