# Supplementary material for: The Proteome Map and PeptideAtlas of a widely cultivated tropical water fish Labeo rohita: A resource for the Aquaculture Community
Source: Research Square preprint supplement (doi:10.21203/rs.3.rs-397364/v1), 2021-04-12
Supplement: Supplementary file 8 [file da0a089958a756b59b1e889c.xlsx]

## Sheet: Description_of_Worksheets
			Worksheet	Description
			LPA_summary	Labeo rohita peptide Atlas summary showing numerical information of spectra, peptides and proteins for all organs.
			All_acetyl	Matrix showing the distribution of all acetylated peptides (and proteins) across the organs with 0 means absent and 1 means present in a particlar organ.
			Acetylated_peptide_plot	Numerical summary of acetylated peptides for all organs.
			All_methyl	Matrix showing the distribution of all Methylated peptides (and proteins) across the organs with 0 means absent and 1 means present in a particlar organ.
			Methylated_peptide_plot	Numerical summary of Methylated peptides for all organs.
			All Phospho	Matrix showing the distribution of all Phosphorylated peptides (and proteins) across the organs with 0 means absent and 1 means present in a particlar organ.
			Phosphopeptide_plot	Numerical summary of Phosphorylated peptides for all organs.
			P_proteins_in text	Description of phosphoproteins (of male and female gonad) mentioned in text
			Muscle_PTM_figure	Description of phosphoproteins (of musle) mentioned in text/ figure 5d).

## Sheet: LPA_summary
ID	Experiment_Name	#_Runs	#_Spectra_Searched	#_Spectra_ID'd	#_Distinct	#_Unique	#_Progressive	#_Cumulative ▿	#_Proteins	#_Cum_Prots	#_Unique_Prots	Experiment_Date	Pubmed/DOI	Other_Repos
7437	Airbladder	18	1073739	174904	20685	813	21147	21147	2428	2428	66	2019-09-12
7441	Embryo	6	342968	52390	18873	437	10563	31710	2813	3360	108	2019-09-12
7447	Female_gonad	24	1299928	168568	28803	3509	17993	49703	2828	4038	194	2019-09-12
7444	Fin	6	421953	28887	9514	72	1899	51602	2074	4188	44	2019-09-12
7431	Gallbladder	9	489743	55310	16688	191	3706	55308	2953	4478	77	2019-09-12
7439	Gill	18	1999739	195736	31593	1118	8852	64160	3552	4808	222	2019-09-12
7433	Gut	18	1005859	191333	27762	1118	6750	70910	3105	4929	147	2019-09-12
7435	Female_Plasma	8	430788	18405	6015	393	3713	74623	562	4954	19	2019-09-12
7442	Scales	15	710427	7924	1826	65	265	74888	323	4956	7	2019-09-12
7434	Skin	13	776257	117844	18632	227	2988	77876	2164	4970	17	2019-09-12
7436	Spinal_cord	18	1093689	212259	40919	1971	14404	92280	3920	5380	169	2019-09-12
7440	Brain	18	1113115	321245	48107	6862	17098	109378	4343	5698	868	2019-09-12
7432	Eye	18	797200	160050	28274	2232	5977	115355	2727	5757	116	2019-09-12
7448	Kidney	18	1131662	225066	33884	956	4281	119636	3467	5803	107	2019-09-12
7445	Liver	18	1203630	335738	43344	5485	12638	132274	3544	5887	282	2019-09-12
7430	Muscle	21	1034502	181665	15386	1183	2407	134681	1697	5894	37	2019-09-12
7438	Spleen	16	817942	82792	21371	704	2199	136880	3036	5916	145	2019-09-12
7446	Heart	18	1042352	231085	35381	1687	3911	140791	3554	5936	160	2019-09-12
7443	Male_gonad	18	847818	200554	35898	4463	9990	150781	3501	6015	277	2019-09-12

## Sheet: All_acetyl
Acetyl type	Protein Accession	Protein name	presence_level	Peptide sequence	Phospho peptide	Acetyl site	Muscle	Gallbladder	Eye	Gut	Skin	Plasma	Spinal_cord	Airbladder	Spleen	Gill	Brain	Embryo	Scales	Male_gonad	Fin	Liver	Heart	Female_gonads	Kidney
K	A0A498L1C9	Sodium/potassium-transporting ATPase subunit alpha-1	subsumed	NLEAVETLGSTSTICSDKTGTLTQNR	NLEAVETLGSTSTIC[160]SDK[170]TGTLTQN[115]R[170]	137	0	0	0	0	0	0	1	0	0	0	0	0	0	0	0	0	0	0	0
K	A0A498L1E4	Retinaldehyde-binding 1-like protein	indistinguishable representative	ATIKEKASEGDDLAK	ATIKEK[170]ASEGDDLAK	81	0	0	1	0	0	0	0	0	0	0	0	0	0	0	0	0	0	0	0
K	A0A498L1E4	Retinaldehyde-binding 1-like protein	indistinguishable representative	AVQEKFENKPDSLLLR	n[43]AVQEK[170]FENKPDSLLLR	91, 95	0	0	2	0	0	0	0	0	0	0	0	0	0	0	0	0	0	0	0
K	A0A498L202	Guanine nucleotide-binding G(K) subunit alpha	canonical	IIHEDGYSDEECK	IIHEDGYSDEEC[160]K[170]	67	0	0	0	1	0	0	0	0	0	0	0	0	0	0	0	0	0	0	0
K	A0A498L2G9	ADP-ribosylation factor 1	canonical	QDLPNAMNAAEITDK	QDLPNAMN[115]AAEITDK[170]	157	0	0	0	0	0	0	0	0	1	0	0	0	0	0	0	0	0	0	0
K	A0A498L2I3	Histone	indistinguishable representative	EIAQDFKTDLR	EIAQDFK[170]TDLR	161	0	0	0	0	0	0	0	0	0	2	0	0	0	0	0	0	2	0	2
K	A0A498L2I3	Histone	indistinguishable representative	FQSAAIGALQEASEAYLVGLFEDTNLCAIHAKR	FQSAAIGALQEASEAYLVGLFEDTN[115]LC[160]AIHAK[170]R	197	0	0	0	0	0	0	0	0	0	0	0	0	0	0	0	2	2	0	3
K	A0A498L2I3	Histone	indistinguishable representative	FQSAAIGALQEASEAYLVGLFEDTNLCAIHAKR	FQSAAIGALQEASEAYLVGLFEDTN[115]LC[160]AIHAK[170]R[170]	197	0	0	0	0	0	0	0	0	0	0	0	0	0	0	0	2	2	0	1
K	A0A498L2I3	Histone	indistinguishable representative	KSAPSTGGVKKPHR	n[43]KSAPSTGGVK[170]KPHR	66, 75, 109, 118	0	0	0	0	0	0	0	0	0	4	0	0	0	0	0	0	0	0	0
K	A0A498L2I3	Histone	indistinguishable representative	KSAPSTGGVKKPHR	n[43]K[170]SAPSTGGVK[142]KPHR	66, 109	0	0	0	0	0	0	0	0	0	0	0	0	0	0	0	0	0	0	4
K	A0A498L2I3	Histone	indistinguishable representative	KSTGGKAPR	n[43]KSTGGK[170]APR	48, 53, 91, 96	0	0	0	0	0	0	0	0	0	0	0	0	0	0	0	16	16	0	20
K	A0A498L2I3	Histone	indistinguishable representative	QLATKAAR	QLATK[170]AAR	62, 105	0	0	0	2	0	0	0	0	0	0	0	0	0	0	0	14	10	0	10
K	A0A498L2I3	Histone	indistinguishable representative	RVTIMPKDIQLAR	RVTIMPK[170]DIQLAR	204	0	0	0	0	0	0	0	0	0	0	1	0	0	0	0	0	0	0	0
K	A0A498L2I3	Histone	indistinguishable representative	VTIMPKDIQLAR	VTIMPK[170]DIQLAR	204	0	0	0	0	0	0	0	0	0	0	0	0	0	0	0	0	0	0	1
K	A0A498L2I3	Histone	indistinguishable representative	YQKSTELLIR	YQK[170]STELLIR	138	0	0	0	0	0	0	0	0	0	1	1	0	0	0	0	0	2	0	1
K	A0A498L2N3	Hyaluronan and proteoglycan link 1-like protein	canonical	FTRDPTSPPNPKLR	FTRDPTSPPN[115]PK[170]LR	75	0	0	0	0	0	0	0	0	0	0	0	0	0	0	0	0	0	0	1
K	A0A498L2T7	Ras-related C3 botulinum toxin substrate 2	representative	MQAIKCVVVGDGAVGK	n[43]MQAIK[170]C[160]VVVGDGAVGK	1, 5	0	0	0	0	0	0	0	0	0	0	2	0	0	0	0	0	0	0	0
K	A0A498L2V9	T-complex 1 subunit alpha	canonical	SLHDALCVVK	SLHDALC[160]VVK[170]	230	0	0	2	2	0	0	2	0	1	2	4	2	0	3	0	0	0	1	0
K	A0A498L311	Translationally-controlled tumor-like protein	canonical	MIIYKDIITGDEMFSDIYK	MIIYK[170]DIITGDEMFSDIYK	5	0	0	0	0	0	0	0	0	0	0	0	0	0	0	0	1	0	0	0
K	A0A498L311	Translationally-controlled tumor-like protein	canonical	MIIYKDIITGDEMFSDIYK	n[43]MIIYK[170]DIITGDEMFSDIYK	1, 5	0	0	0	0	0	0	0	0	0	0	0	0	0	0	0	2	0	0	0
K	A0A498L3K0	Gamma-crystallin M2-like protein	representative	MMGKVIFYEDRNFQGR	n[43]MMGK[170]VIFYEDRNFQGR	1, 4	0	0	4	0	0	0	0	0	0	0	0	0	0	0	0	0	0	0	0
K	A0A498L3L0	Beta-crystallin S-1-like protein	canonical	EINSCKVQEGPCVFFEHANYR	n[43]EIN[115]SC[160]K[170]VQEGPC[160]VFFEHANYR	123, 128	0	0	2	0	0	0	0	0	0	0	0	0	0	0	0	0	0	0	0
K	A0A498L3L0	Beta-crystallin S-1-like protein	canonical	SYECKGDTSDLHSFFSR	SYEC[160]K[170]GDTSDLHSFFSR	22	0	0	2	0	0	0	0	0	0	0	0	0	0	1	0	0	0	0	0
K	A0A498L3N5	Histone H1-like protein	subsumed	ALAAGGYDVEKNNSR	ALAAGGYDVEK[170]NN[115]SR[170]	68	0	0	0	0	0	0	0	0	1	0	0	0	0	0	0	0	0	0	0
K	A0A498L3N5	Histone H1-like protein	subsumed	ALAAGGYDVEKNNSR	ALAAGGYDVEK[170]N[115]NSR	68	0	0	0	0	0	0	0	0	0	0	0	0	0	0	0	0	1	0	5
K	A0A498L3N5	Histone H1-like protein	subsumed	ALAAGGYDVEKNNSR	ALAAGGYDVEK[170]N[115]NSR[170]	68	0	0	0	0	0	0	0	0	3	3	2	7	0	0	0	0	9	0	0
K	A0A498L3N5	Histone H1-like protein	subsumed	GTGASGSFKVSK	GTGASGSFK[170]VSK	99	0	0	0	0	0	0	0	0	0	0	0	0	0	0	0	0	1	0	0
K	A0A498L3N5	Histone H1-like protein	subsumed	KALAAGGYDVEKNNSR	KALAAGGYDVEK[170]NNSR	68	0	0	0	0	0	0	0	0	0	0	0	0	0	0	0	0	2	0	0
K	A0A498L3N5	Histone H1-like protein	subsumed	KALAAGGYDVEKNNSR	KALAAGGYDVEK[170]N[115]NSR	68	0	0	0	0	0	0	0	0	0	0	0	0	0	0	0	0	3	0	0
K	A0A498L3N5	Histone H1-like protein	subsumed	KALAAGGYDVEKNNSR	KALAAGGYDVEK[170]N[115]NSR[170]	68	0	0	0	0	0	0	0	0	0	0	0	0	0	0	0	0	1	0	0
K	A0A498L3N5	Histone H1-like protein	subsumed	KALAAGGYDVEKNNSR	n[15]K[170]ALAAGGYDVEKNNSR	57	0	0	0	0	0	0	0	0	0	0	0	0	0	0	0	0	1	0	0
K	A0A498L3N5	Histone H1-like protein	subsumed	SGVSLAALKK	SGVSLAALK[170]K	56	0	0	0	0	0	0	0	0	0	0	0	0	0	0	0	0	1	0	0
K	A0A498L3V5	Heat shock 70 kDa	indistinguishable representative	IAAKNALESYAFNMK	IAAK[170]N[115]ALESYAFNMK	539	0	0	0	0	0	0	0	0	0	0	0	0	0	1	0	0	0	0	0
K	A0A498L3V5	Heat shock 70 kDa	indistinguishable representative	NALESYAFNMK	NALESYAFN[115]MK[170]	550	0	0	0	1	0	0	0	0	0	0	0	0	0	0	0	0	0	0	0
K	A0A498L447	Gamma-crystallin M2-like protein	canonical	VESGCWMMYDRPNYMGNQYFFKR	VESGC[160]WMMYDRPN[115]YMGNQYFFK[170]R	59	0	0	1	0	0	0	0	0	0	0	0	0	0	0	0	0	0	0	0
K	A0A498L478	Histone H2B	subsumed	HAVSEGTKAVTK	HAVSEGTK[170]AVTK	115	0	0	0	0	0	0	0	0	0	0	0	0	0	0	0	0	3	0	1
K	A0A498L478	Histone H2B	subsumed	HAVSEGTKAVTKYTSSK	HAVSEGTKAVTK[170]YTSSK	119	0	0	1	0	0	0	0	0	0	0	0	0	0	0	0	0	0	0	1
K	A0A498L478	Histone H2B	subsumed	HAVSEGTKAVTKYTSSK	HAVSEGTK[170]AVTKYTSSK	115	0	0	0	0	0	0	0	0	0	0	0	0	0	0	0	0	0	0	3
K	A0A498L478	Histone H2B	subsumed	HAVSEGTKAVTKYTSSK	n[43]HAVSEGTKAVTK[170]YTSSK	108, 119	0	0	0	0	0	0	0	0	0	0	0	0	0	0	0	0	0	0	2
K	A0A498L478	Histone H2B	subsumed	KESYAIYVYK	n[15]K[170]ESYAIYVYK	33	0	1	0	0	0	0	0	0	0	0	0	0	0	0	1	0	0	0	0
K	A0A498L478	Histone H2B	subsumed	LLLPGELAKHAVSEGTK	LLLPGELAK[170]HAVSEGTK	107	0	0	0	0	0	0	0	0	0	0	1	1	0	0	0	2	2	0	2
K	A0A498L478	Histone H2B	subsumed	LLLPGELAKHAVSEGTKAVTK	LLLPGELAK[170]HAVSEGTKAVTK	107	0	0	0	0	0	0	0	0	0	0	0	0	0	0	0	0	0	0	1
K	A0A498L478	Histone H2B	subsumed	QVHPDTGISSKAMGIMNSFVNDIFER	QVHPDTGISSK[170]AMGIMNSFVNDIFER	56	0	0	0	0	0	0	0	0	0	0	0	0	0	0	0	0	0	0	1
K	A0A498L478	Histone H2B	subsumed	QVHPDTGISSKAMGIMNSFVNDIFER	QVHPDTGISSK[170]AMGIMN[115]SFVNDIFER	56	0	0	0	0	0	0	0	0	0	0	0	0	0	0	0	0	1	0	0
K	A0A498L478	Histone H2B	subsumed	QVHPDTGISSKAMGIMNSFVNDIFER	QVHPDTGISSK[170]AM[147]GIMNSFVNDIFER	56	0	0	0	0	0	0	0	0	0	0	0	0	0	0	0	1	0	0	0
K	A0A498L478	Histone H2B	subsumed	QVHPDTGISSKAMGIMNSFVNDIFER	Q[111]VHPDTGISSK[170]AMGIMNSFVNDIFER	56	0	0	0	0	0	0	0	0	0	0	0	0	0	0	0	0	0	0	1
K	A0A498L478	Histone H2B	subsumed	QVHPDTGISSKAMGIMNSFVNDIFER	Q[111]VHPDTGISSK[170]AM[147]GIMN[115]SFVNDIFER	56	0	0	0	0	0	0	0	0	0	0	0	0	0	0	0	0	0	0	1
K	A0A498L478	Histone H2B	subsumed	VMKQVHPDTGISSK	n[43]VMK[170]QVHPDTGISSK	43, 45	0	0	0	0	0	0	0	0	0	0	0	0	0	0	0	0	0	0	2
K	A0A498L488	Histone H2A	subsumed	HLQLAVRNDEELNKLLGGVTIAQGGVLPNIQAVLLPK	HLQLAVRNDEELNK[170]LLGGVTIAQGGVLPNIQAVLLPK	96	0	0	2	0	0	0	0	0	0	0	0	0	0	0	0	0	0	0	0
K	A0A498L488	Histone H2A	subsumed	HLQLAVRNDEELNKLLGGVTIAQGGVLPNIQAVLLPK	HLQLAVRNDEELN[115]K[170]LLGGVTIAQGGVLPNIQAVLLPK	96	0	0	0	0	0	0	0	0	0	0	0	0	0	0	0	0	0	0	1
K	A0A498L488	Histone H2A	subsumed	HLQLAVRNDEELNKLLGGVTIAQGGVLPNIQAVLLPK	HLQLAVRN[115]DEELNK[170]LLGGVTIAQGGVLPNIQAVLLPK	96	0	0	0	0	0	0	0	0	0	0	0	0	0	0	0	2	0	0	0
K	A0A498L488	Histone H2A	subsumed	HLQLAVRNDEELNKLLGGVTIAQGGVLPNIQAVLLPK	HLQLAVRN[115]DEELN[115]K[170]LLGGVTIAQGGVLPNIQAVLLPK	96	0	0	0	0	0	0	0	0	0	0	0	0	0	0	0	0	0	0	2
K	A0A498L488	Histone H2A	subsumed	NDEELNKLLGGVTIAQGGVLPNIQAVLLPK	NDEELNK[170]LLGGVTIAQGGVLPNIQAVLLPK	96	0	0	0	0	0	0	0	0	0	0	0	0	0	1	0	0	1	0	0
K	A0A498L488	Histone H2A	subsumed	NDEELNKLLGGVTIAQGGVLPNIQAVLLPK	NDEELN[115]K[170]LLGGVTIAQGGVLPNIQAVLLPK	96	0	0	1	0	0	0	0	0	0	0	0	0	0	1	0	0	0	0	2
K	A0A498L488	Histone H2A	subsumed	NDEELNKLLGGVTIAQGGVLPNIQAVLLPK	N[115]DEELN[115]K[170]LLGGVTIAQGGVLPNIQAVLLPK	96	0	0	0	0	0	0	0	0	0	0	0	0	0	0	0	0	0	0	1
K	A0A498L488	Histone H2A	subsumed	NDEELNKLLGGVTIAQGGVLPNIQAVLLPKK	NDEELNKLLGGVTIAQGGVLPN[115]IQAVLLPK[170]K	119	0	0	0	0	0	0	0	0	0	0	0	0	0	0	0	0	0	0	1
K	A0A498L488	Histone H2A	subsumed	VTIAQGGVLPNIQAVLLPKK	VTIAQGGVLPNIQAVLLPK[170]K	119	0	0	0	1	0	0	0	0	0	0	0	0	0	0	0	0	0	0	0
K	A0A498L494	Catechol O-methyltransferase-like protein	representative	NATKGDPQSVISAIDHYCR	NATK[170]GDPQSVISAIDHYC[160]R	112	0	0	0	0	0	0	0	0	0	0	0	0	0	0	0	1	0	0	0
K	A0A498L4A0	Myofibril-bound serine ase	canonical	DSCQGDSGGPVVCNGK	DSC[160]QGDSGGPVVC[160]NGK[170]	148	0	0	0	0	0	0	0	0	2	0	0	0	0	0	0	0	0	0	0
K	A0A498L4A0	Myofibril-bound serine ase	canonical	DSCQGDSGGPVVCNGK	DSC[160]QGDSGGPVVC[160]N[115]GK[170]	148	0	0	0	0	0	0	0	0	3	0	0	0	0	0	0	0	0	0	0
K	A0A498L4F1	Glyceraldehyde-3-phosphate testis-specific	canonical	AVGKVIPELNGK	AVGK[170]VIPELN[115]GK	233	0	0	0	0	0	0	0	0	0	0	0	0	0	0	0	1	0	0	1
K	A0A498L4F1	Glyceraldehyde-3-phosphate testis-specific	canonical	AVGKVIPELNGKLTGMAFR	AVGK[170]VIPELN[115]GKLTGMAFR	233	0	0	1	0	0	0	0	0	0	0	1	0	0	0	0	2	1	0	3
K	A0A498L4F1	Glyceraldehyde-3-phosphate testis-specific	canonical	AVGKVIPELNGKLTGMAFR	AVGK[170]VIPELN[115]GKLTGM[147]AFR	233	0	0	1	0	0	0	0	0	0	0	0	0	0	0	0	2	0	0	0
K	A0A498L4F1	Glyceraldehyde-3-phosphate testis-specific	canonical	AVGKVIPELNGKLTGMAFR	n[15]AVGK[170]VIPELN[115]GKLTGMAFR	233	1	0	0	0	0	0	0	0	0	0	0	0	0	0	0	1	0	0	0
K	A0A498L4F1	Glyceraldehyde-3-phosphate testis-specific	canonical	GAHQNIIPASTGAAKAVGK	GAHQNIIPASTGAAK[170]AVGK	229	0	0	0	0	0	0	2	0	0	0	1	0	0	0	0	0	0	0	1
K	A0A498L4F1	Glyceraldehyde-3-phosphate testis-specific	canonical	LSKPASYADIK	LSK[170]PASYADIK	265	0	0	0	0	0	0	1	0	0	0	0	0	0	0	0	0	0	0	0
K	A0A498L4F1	Glyceraldehyde-3-phosphate testis-specific	canonical	LSKPASYADIKESVK	LSK[170]PASYADIKESVK	265	0	0	0	0	0	0	0	0	0	0	0	0	0	2	0	0	0	0	3
K	A0A498L4F1	Glyceraldehyde-3-phosphate testis-specific	canonical	LSKPASYADIKESVK	n[43]LSK[170]PASYADIKESVK	263, 265	0	0	2	0	0	0	0	0	0	0	0	0	0	0	0	0	0	0	0
K	A0A498L4F1	Glyceraldehyde-3-phosphate testis-specific	canonical	LSKPASYADIKESVKK	LSK[170]PASYADIKESVKK	265	0	0	2	0	0	0	6	0	0	0	9	0	0	2	0	0	0	0	12
K	A0A498L4F1	Glyceraldehyde-3-phosphate testis-specific	canonical	LSKPASYADIKESVKK	n[43]LSK[170]PASYADIKESVKK	263, 265	0	0	2	0	0	0	0	0	0	0	0	0	0	0	0	0	0	0	0
K	A0A498L4F1	Glyceraldehyde-3-phosphate testis-specific	canonical	RVVVSAPSPDAPMFVMGVNQDKYDPSSMTIVSNASCTTNCLAPLAK	RVVVSAPSPDAPMFVMGVNQDK[170]YDPSSMTIVSNASC[160]TTNC[160]LAPLAK	152	0	0	0	0	0	0	1	0	0	0	0	0	0	0	0	0	0	0	0
K	A0A498L4F1	Glyceraldehyde-3-phosphate testis-specific	canonical	RVVVSAPSPDAPMFVMGVNQDKYDPSSMTIVSNASCTTNCLAPLAK	RVVVSAPSPDAPMFVM[147]GVNQDK[170]YDPSSMTIVSNASC[160]TTNC[160]LAPLAK	152	0	0	0	1	0	0	0	0	0	0	0	0	0	0	0	0	0	0	0
K	A0A498L4F1	Glyceraldehyde-3-phosphate testis-specific	canonical	RVVVSAPSPDAPMFVMGVNQDKYDPSSMTIVSNASCTTNCLAPLAK	RVVVSAPSPDAPM[147]FVMGVNQDK[170]YDPSSMTIVSNASC[160]TTNC[160]LAPLAK	152	0	0	0	0	0	0	1	0	0	0	5	0	0	0	0	0	0	0	0
K	A0A498L4F1	Glyceraldehyde-3-phosphate testis-specific	canonical	VIHDNFGIEEALMTTVHAYTATQK	VIHDNFGIEEALM[147]TTVHAYTATQK[170]	200	0	0	0	0	0	0	1	0	0	1	0	0	0	0	0	0	0	0	0
K	A0A498L4F1	Glyceraldehyde-3-phosphate testis-specific	canonical	VIHDNFGIEEALMTTVHAYTATQKTVDGPSAK	VIHDNFGIEEALMTTVHAYTATQK[170]TVDGPSAK	200	0	0	3	0	0	0	4	1	0	0	14	0	0	0	0	0	1	0	6
K	A0A498L4F1	Glyceraldehyde-3-phosphate testis-specific	canonical	VIHDNFGIEEALMTTVHAYTATQKTVDGPSAK	VIHDNFGIEEALM[147]TTVHAYTATQK[170]TVDGPSAK	200	0	0	0	0	0	0	4	0	0	0	2	0	0	0	0	0	0	0	0
K	A0A498L4F1	Glyceraldehyde-3-phosphate testis-specific	canonical	VIPELNGKLTGMAFR	VIPELNGK[170]LTGMAFR	241	6	1	0	0	2	0	0	1	0	0	1	0	0	0	0	5	0	0	0
K	A0A498L4F1	Glyceraldehyde-3-phosphate testis-specific	canonical	VIPELNGKLTGMAFR	VIPELNGK[170]LTGM[147]AFR	241	1	0	0	0	0	0	0	0	0	0	0	0	0	0	1	4	1	0	0
K	A0A498L4F1	Glyceraldehyde-3-phosphate testis-specific	canonical	VIPELNGKLTGMAFR	VIPELN[115]GK[170]LTGMAFR	241	1	0	0	0	0	0	0	0	1	0	1	0	0	0	1	2	0	0	0
K	A0A498L4F1	Glyceraldehyde-3-phosphate testis-specific	canonical	VIPELNGKLTGMAFR	n[43]VIPELNGK[170]LTGMAFR	234, 241	0	0	0	0	0	0	0	0	0	0	2	0	0	0	0	0	0	0	4
K	A0A498L4F1	Glyceraldehyde-3-phosphate testis-specific	canonical	VIPELNGKLTGMAFR	n[43]VIPELN[115]GK[170]LTGMAFR	234, 241	0	0	0	0	0	0	0	0	0	0	0	0	0	0	2	2	0	0	0
K	A0A498L4F1	Glyceraldehyde-3-phosphate testis-specific	canonical	VIPELNGKLTGMAFRVPVADVSVVDLTCR	VIPELNGK[170]LTGM[147]AFRVPVADVSVVDLTC[160]R	241	0	0	0	0	0	0	1	0	0	0	0	0	0	0	0	0	0	0	0
K	A0A498L4F1	Glyceraldehyde-3-phosphate testis-specific	canonical	VIPELNGKLTGMAFRVPVADVSVVDLTCR	VIPELN[115]GK[170]LTGMAFRVPVADVSVVDLTC[160]R	241	0	0	1	0	0	0	0	0	0	0	0	0	0	0	0	0	0	0	0
K	A0A498L4F1	Glyceraldehyde-3-phosphate testis-specific	canonical	VVVSAPSPDAPMFVMGVNQDKYDPSSMTIVSNASCTTNCLAPLAK	VVVSAPSPDAPM[147]FVMGVNQDK[170]YDPSSMTIVSNASC[160]TTNC[160]LAPLAK	152	0	0	0	1	0	0	1	0	0	0	0	0	0	0	0	0	0	0	0
K	A0A498L4F1	Glyceraldehyde-3-phosphate testis-specific	canonical	VVVSAPSPDAPMFVMGVNQDKYDPSSMTIVSNASCTTNCLAPLAK	VVVSAPSPDAPM[147]FVMGVNQDK[170]YDPSSMTIVSN[115]ASC[160]TTNC[160]LAPLAK	152	0	0	0	0	0	0	0	0	0	0	1	0	0	0	0	0	0	0	0
K	A0A498L4F1	Glyceraldehyde-3-phosphate testis-specific	canonical	VVVSAPSPDAPMFVMGVNQDKYDPSSMTIVSNASCTTNCLAPLAK	VVVSAPSPDAPM[147]FVM[147]GVNQDK[170]YDPSSMTIVSNASC[160]TTNC[160]LAPLAK	152	0	0	0	0	0	0	0	0	0	0	1	0	0	0	0	0	0	0	0
K	A0A498L4F1	Glyceraldehyde-3-phosphate testis-specific	canonical	VVVSAPSPDAPMFVMGVNQDKYDPSSMTIVSNASCTTNCLAPLAK	n[15]VVVSAPSPDAPMFVMGVNQDKYDPSSMTIVSN[115]ASC[160]TTNC[160]LAPLAK[170]	176	0	0	0	0	0	0	0	0	0	0	1	0	0	0	0	0	0	0	0
K	A0A498L4F1	Glyceraldehyde-3-phosphate testis-specific	canonical	VVVSAPSPDAPMFVMGVNQDKYDPSSMTIVSNASCTTNCLAPLAK	n[15]VVVSAPSPDAPMFVMGVNQDK[170]YDPSSMTIVSNASC[160]TTNC[160]LAPLAK	152	0	0	0	0	0	0	0	0	0	0	1	0	0	0	0	0	0	0	0
K	A0A498L4F1	Glyceraldehyde-3-phosphate testis-specific	canonical	VVVSAPSPDAPMFVMGVNQDKYDPSSMTIVSNASCTTNCLAPLAK	n[15]VVVSAPSPDAPMFVMGVN[115]QDK[170]YDPSSMTIVSNASC[160]TTNC[160]LAPLAK	152	0	0	0	0	0	0	0	1	0	0	0	0	0	0	0	0	0	0	0
K	A0A498L4G6	Gamma-crystallin M2-like protein	canonical	MMGKVIFYEDRNFQGR	n[43]MMGK[170]VIFYEDRNFQGR	1, 4	0	0	4	0	0	0	0	0	0	0	0	0	0	0	0	0	0	0	0
K	A0A498L4J5	Histone H3	representative	EIAQDFKTDLR	EIAQDFK[170]TDLR	193	0	0	0	0	0	0	0	0	0	2	0	0	0	0	0	0	2	0	2
K	A0A498L4J5	Histone H3	representative	FQSSAVMALQEASEAYLVGLFEDTNLCAIHAKR	FQSSAVMALQEASEAYLVGLFEDTNLC[160]AIHAK[170]R	229	0	0	0	0	0	0	0	0	0	0	0	0	0	0	0	1	1	0	0
K	A0A498L4J5	Histone H3	representative	FQSSAVMALQEASEAYLVGLFEDTNLCAIHAKR	FQSSAVMALQEASEAYLVGLFEDTN[115]LC[160]AIHAK[170]R	229	0	0	0	0	0	0	0	0	0	0	0	0	0	0	0	2	3	0	7
K	A0A498L4J5	Histone H3	representative	FQSSAVMALQEASEAYLVGLFEDTNLCAIHAKR	FQSSAVMALQEASEAYLVGLFEDTN[115]LC[160]AIHAK[170]R[170]	229	0	0	0	0	0	0	0	0	0	0	0	0	0	0	0	2	3	0	2
K	A0A498L4J5	Histone H3	representative	FQSSAVMALQEASEAYLVGLFEDTNLCAIHAKR	FQSSAVM[147]ALQEASEAYLVGLFEDTN[115]LC[160]AIHAK[170]R	229	0	0	0	0	0	0	0	0	0	0	0	0	0	0	0	0	1	0	2
K	A0A498L4J5	Histone H3	representative	FQSSAVMALQEASEAYLVGLFEDTNLCAIHAKR	FQSSAVM[147]ALQEASEAYLVGLFEDTN[115]LC[160]AIHAK[170]R[170]	229	0	0	0	0	0	0	0	0	0	0	0	0	0	0	0	1	2	0	0
K	A0A498L4J5	Histone H3	representative	KSAPATGGVK	n[15]KSAPATGGVK[170]	150	0	0	0	0	0	0	0	0	0	0	0	0	0	0	0	0	0	0	1
K	A0A498L4J5	Histone H3	representative	KSAPATGGVK	n[15]K[170]SAPATGGVK	141	0	0	0	0	0	0	0	0	0	0	0	0	0	0	0	1	2	0	3
K	A0A498L4J5	Histone H3	representative	KSAPATGGVKKPHR	n[15]K[170]SAPATGGVK[142]KPHR	141	0	0	0	0	0	0	0	0	0	0	0	0	0	0	0	0	0	0	2
K	A0A498L4J5	Histone H3	representative	KSAPATGGVKKPHR	n[43]K[170]SAPATGGVK[142]KPHR	141	0	0	0	0	0	0	0	0	0	0	0	0	0	0	0	0	0	0	2
K	A0A498L4J5	Histone H3	representative	KSTGGKAPR	n[43]KSTGGK[170]APR	123, 128	0	0	0	0	0	0	0	0	0	0	0	0	0	0	0	8	8	0	10
K	A0A498L4J5	Histone H3	representative	QLATKAAR	QLATK[170]AAR	137	0	0	0	1	0	0	0	0	0	0	0	0	0	0	0	7	5	0	5
K	A0A498L4J5	Histone H3	representative	RVTIMPKDIQLAR	RVTIMPK[170]DIQLAR	236	0	0	0	0	0	0	0	0	0	0	1	0	0	0	0	0	0	0	0
K	A0A498L4J5	Histone H3	representative	VTIMPKDIQLAR	VTIMPK[170]DIQLAR	236	0	0	0	0	0	0	0	0	0	0	0	0	0	0	0	0	0	0	1
K	A0A498L4J5	Histone H3	representative	YQKSTELLIR	YQK[170]STELLIR	170	0	0	0	0	0	0	0	0	0	1	1	0	0	0	0	0	2	0	1
K	A0A498L4J6	Aspartate--tRNA cytoplasmic	subsumed	MKVQRAGEEEQQAQSK	n[43]M[147]K[170]VQR[170]AGEEEQQAQSK	1, 2	0	0	0	0	0	0	0	0	0	0	6	0	0	0	0	8	0	2	0
K	A0A498L4K7	FEV protein	subsumed	SIKVENGPWVGYEYPEFQGQQFILEK	SIK[170]VEN[115]GPWVGYEYPEFQGQQFILEK	49	0	0	1	0	0	0	0	0	0	0	0	0	0	0	0	0	0	0	0
K	A0A498L4K7	FEV protein	subsumed	TEHLLSFRPIKCANHSDSK	TEHLLSFRPIK[170]C[160]ANHSDSK	99	0	0	0	0	0	0	0	0	0	0	0	0	0	1	0	0	0	0	0
K	A0A498L4K7	FEV protein	subsumed	TEHLLSFRPIKCANHSDSK	TEHLLSFRPIK[170]C[160]AN[115]HSDSK	99	0	0	4	0	0	0	0	0	0	0	0	0	0	0	0	0	0	0	0
K	A0A498L4Y6	Dehydrogenase reductase SDR family member 1	canonical	LDLLVNNAYAGVQAIFDNMNKK	LDLLVNNAYAGVQAIFDN[115]MNK[142]K[170]	105	0	0	0	0	0	0	0	0	0	0	0	0	0	0	0	1	0	0	0
K	A0A498L4Z6	ADP-ribosylation factor 1-like protein	marginally distinguished	QDLPNAMNAAEITDK	QDLPNAMN[115]AAEITDK[170]	142	0	0	0	0	0	0	0	0	1	0	0	0	0	0	0	0	0	0	0
K	A0A498L4Z7	Fructose-bisphosphate aldolase (EC 4.1.2.13)	subsumed	ACQEEFVKR	AC[160]QEEFVK[170]R	330	3	0	0	1	3	0	0	0	0	0	0	0	0	0	0	0	0	0	0
K	A0A498L4Z7	Fructose-bisphosphate aldolase (EC 4.1.2.13)	subsumed	ALNNSQACVGKYVSSGDKGAAAGESLFVANHAY	ALNNSQAC[160]VGKYVSSGDK[170]GAAAGESLFVANHAY	349	1	0	0	0	0	0	0	0	0	0	0	0	0	0	0	0	0	0	0
K	A0A498L4Z7	Fructose-bisphosphate aldolase (EC 4.1.2.13)	subsumed	ALNNSQACVGKYVSSGDKGAAAGESLFVANHAY	ALNNSQAC[160]VGK[170]YVSSGDKGAAAGESLFVANHAY	342	2	0	0	0	1	0	0	0	0	0	0	0	0	0	0	0	0	0	0
K	A0A498L4Z7	Fructose-bisphosphate aldolase (EC 4.1.2.13)	subsumed	ALNNSQACVGKYVSSGDKGAAAGESLFVANHAY	ALNNSQAC[160]VGK[170]YVSSGDKGAAAGESLFVAN[115]HAY	342	2	0	0	0	0	0	0	0	0	0	0	0	0	0	0	0	0	0	0
K	A0A498L4Z7	Fructose-bisphosphate aldolase (EC 4.1.2.13)	subsumed	ALNNSQACVGKYVSSGDKGAAAGESLFVANHAY	ALNN[115]SQAC[160]VGKYVSSGDK[170]GAAAGESLFVANHAY	349	1	0	0	0	0	0	0	0	0	0	0	0	0	0	0	0	0	0	0
K	A0A498L4Z7	Fructose-bisphosphate aldolase (EC 4.1.2.13)	subsumed	ALNNSQACVGKYVSSGDKGAAAGESLFVANHAY	n[43]ALN[115]N[115]SQAC[160]VGK[142]YVSSGDK[170]GAAAGESLFVANHAY	332, 349	2	0	0	0	0	0	0	0	0	0	0	0	0	0	0	0	0	0	0
K	A0A498L4Z7	Fructose-bisphosphate aldolase (EC 4.1.2.13)	subsumed	ALSDHHVYLEGTLLKPNMVTAGHSCSQK	ALSDHHVYLEGTLLKPNM[147]VTAGHSC[160]SQK[170]	243	1	0	0	0	0	0	0	0	0	0	0	0	0	0	0	0	0	0	0
K	A0A498L4Z7	Fructose-bisphosphate aldolase (EC 4.1.2.13)	subsumed	ALSDHHVYLEGTLLKPNMVTAGHSCSQK	ALSDHHVYLEGTLLKPN[115]MVTAGHSC[160]SQK[170]	243	0	0	0	0	1	0	0	0	0	0	0	0	0	0	0	0	0	0	0
K	A0A498L4Z7	Fructose-bisphosphate aldolase (EC 4.1.2.13)	subsumed	ALSDHHVYLEGTLLKPNMVTAGHSCSQK	ALSDHHVYLEGTLLK[142]PN[115]MVTAGHSC[160]SQK[170]	243	0	0	0	0	1	0	0	0	0	0	0	0	0	0	0	0	0	0	0
K	A0A498L4Z7	Fructose-bisphosphate aldolase (EC 4.1.2.13)	subsumed	ALSDHHVYLEGTLLKPNMVTAGHSCSQK	ALSDHHVYLEGTLLK[170]PNMVTAGHSC[160]SQK	230	5	0	0	0	1	0	0	0	0	0	0	0	0	0	0	0	0	0	1
K	A0A498L4Z7	Fructose-bisphosphate aldolase (EC 4.1.2.13)	subsumed	ALSDHHVYLEGTLLKPNMVTAGHSCSQK	ALSDHHVYLEGTLLK[170]PNMVTAGHSC[160]SQK[142]	230	2	0	0	0	0	0	0	0	0	0	0	0	0	0	0	0	0	0	0
K	A0A498L4Z7	Fructose-bisphosphate aldolase (EC 4.1.2.13)	subsumed	ALSDHHVYLEGTLLKPNMVTAGHSCSQK	ALSDHHVYLEGTLLK[170]PNM[147]VTAGHSC[160]SQK	230	23	0	0	0	17	0	0	0	0	0	0	0	0	0	0	0	0	0	0
K	A0A498L4Z7	Fructose-bisphosphate aldolase (EC 4.1.2.13)	subsumed	ALSDHHVYLEGTLLKPNMVTAGHSCSQK	ALSDHHVYLEGTLLK[170]PNM[147]VTAGHSC[160]SQK[142]	230	10	0	0	0	4	0	0	0	0	0	0	0	0	0	0	0	0	0	0
K	A0A498L4Z7	Fructose-bisphosphate aldolase (EC 4.1.2.13)	subsumed	ALSDHHVYLEGTLLKPNMVTAGHSCSQK	ALSDHHVYLEGTLLK[170]PN[115]MVTAGHSC[160]SQK	230	3	0	0	0	2	0	0	0	0	0	0	0	0	0	0	0	0	0	0
K	A0A498L4Z7	Fructose-bisphosphate aldolase (EC 4.1.2.13)	subsumed	ALSDHHVYLEGTLLKPNMVTAGHSCSQK	ALSDHHVYLEGTLLK[170]PN[115]MVTAGHSC[160]SQK[142]	230	2	0	0	0	0	0	0	0	0	0	0	0	0	0	0	0	0	0	0
K	A0A498L4Z7	Fructose-bisphosphate aldolase (EC 4.1.2.13)	subsumed	ALSDHHVYLEGTLLKPNMVTAGHSCSQK	ALSDHHVYLEGTLLK[170]PN[115]M[147]VTAGHSC[160]SQK	230	2	0	0	0	1	0	0	0	0	0	0	0	0	0	0	0	0	0	0
K	A0A498L4Z7	Fructose-bisphosphate aldolase (EC 4.1.2.13)	subsumed	ALSDHHVYLEGTLLKPNMVTAGHSCSQK	n[15]ALSDHHVYLEGTLLK[170]PNMVTAGHSC[160]SQK	230	0	0	0	0	1	0	0	0	0	0	0	0	0	0	0	0	0	0	0
K	A0A498L4Z7	Fructose-bisphosphate aldolase (EC 4.1.2.13)	subsumed	CQYVTEKVLAAVYK	C[143]QYVTEK[170]VLAAVYK	208	1	0	0	0	1	0	0	0	0	0	0	0	0	0	0	0	0	0	2
K	A0A498L4Z7	Fructose-bisphosphate aldolase (EC 4.1.2.13)	subsumed	CQYVTEKVLAAVYK	C[160]QYVTEK[170]VLAAVYK	208	1	0	0	0	1	0	0	0	0	0	0	0	0	0	0	0	0	0	0
K	A0A498L4Z7	Fructose-bisphosphate aldolase (EC 4.1.2.13)	subsumed	CVLKITPTTPSR	C[160]VLK[170]ITPTTPSR	153	0	0	1	0	2	0	0	0	0	0	0	0	0	0	0	0	0	0	0
K	A0A498L4Z7	Fructose-bisphosphate aldolase (EC 4.1.2.13)	subsumed	DGADFAKWR	DGADFAK[170]WR	147	1	0	0	0	0	0	0	0	0	0	0	0	0	0	0	0	0	0	0
K	A0A498L4Z7	Fructose-bisphosphate aldolase (EC 4.1.2.13)	subsumed	ENGKACQEEFVKR	E[111]N[115]GK[170]AC[160]QEEFVKR	322	0	0	0	0	0	0	0	0	0	0	0	0	0	0	0	0	1	0	1
K	A0A498L4Z7	Fructose-bisphosphate aldolase (EC 4.1.2.13)	subsumed	GILAADESTGSVAKR	GILAADESTGSVAK[170]R	42	1	0	0	0	1	0	0	0	0	0	0	0	0	0	0	0	0	0	0
K	A0A498L4Z7	Fructose-bisphosphate aldolase (EC 4.1.2.13)	subsumed	GMVVGIKVDKGVVPLAGTNGETTTQGLDGLYER	GMVVGIK[142]VDK[170]GVVPLAGTN[115]GETTTQGLDGLYER	111	0	0	0	0	1	0	0	0	0	0	0	0	0	0	0	0	0	0	0
K	A0A498L4Z7	Fructose-bisphosphate aldolase (EC 4.1.2.13)	subsumed	GMVVGIKVDKGVVPLAGTNGETTTQGLDGLYER	GMVVGIK[170]VDKGVVPLAGTNGETTTQGLDGLYER	108	4	0	0	0	0	0	0	0	0	0	0	0	0	0	0	0	0	0	0
K	A0A498L4Z7	Fructose-bisphosphate aldolase (EC 4.1.2.13)	subsumed	IVAPGKGILAADESTGSVAK	IVAPGK[170]GILAADESTGSVAK	28	4	0	5	0	6	0	0	0	0	2	0	0	0	4	1	0	4	0	5
K	A0A498L4Z7	Fructose-bisphosphate aldolase (EC 4.1.2.13)	subsumed	IVAPGKGILAADESTGSVAK	n[15]IVAPGK[170]GILAADESTGSVAK	28	0	0	0	1	1	0	0	0	0	0	0	0	0	0	0	0	0	0	0
K	A0A498L4Z7	Fructose-bisphosphate aldolase (EC 4.1.2.13)	subsumed	IVAPGKGILAADESTGSVAKR	IVAPGKGILAADESTGSVAK[170]R	42	0	0	0	0	1	0	0	0	0	0	0	0	0	0	0	0	0	0	0
K	A0A498L4Z7	Fructose-bisphosphate aldolase (EC 4.1.2.13)	subsumed	IVAPGKGILAADESTGSVAKR	IVAPGK[170]GILAADESTGSVAKR	28	6	0	1	0	2	0	1	0	0	0	0	0	0	0	0	0	1	0	3
K	A0A498L4Z7	Fructose-bisphosphate aldolase (EC 4.1.2.13)	subsumed	IVAPGKGILAADESTGSVAKR	n[15]IVAPGK[170]GILAADESTGSVAKR	28	11	0	0	1	0	0	0	0	0	0	0	0	0	1	0	0	0	0	0
K	A0A498L4Z7	Fructose-bisphosphate aldolase (EC 4.1.2.13)	subsumed	IVAPGKGILAADESTGSVAKR	n[43]IVAPGK[170]GILAADESTGSVAKR	23, 28	0	0	6	0	0	0	0	0	0	2	0	0	0	0	0	0	0	0	6
K	A0A498L4Z7	Fructose-bisphosphate aldolase (EC 4.1.2.13)	subsumed	PHAYPFLTPEQKKELSDIAQR	PHAYPFLTPEQK[170]KELSDIAQR	13	0	0	3	0	0	0	0	0	0	0	0	0	0	0	0	0	0	0	0
K	A0A498L4Z7	Fructose-bisphosphate aldolase (EC 4.1.2.13)	subsumed	VDKGVVPLAGTNGETTTQGLDGLYER	VDK[170]GVVPLAGTNGETTTQGLDGLYER	111	1	0	0	0	0	0	0	0	0	0	0	0	0	0	0	0	0	0	0
K	A0A498L4Z7	Fructose-bisphosphate aldolase (EC 4.1.2.13)	subsumed	VDKGVVPLAGTNGETTTQGLDGLYER	n[15]VDK[170]GVVPLAGTN[115]GETTTQGLDGLYER	111	2	0	0	0	0	0	0	0	0	0	0	0	0	0	0	0	0	0	0
K	A0A498L4Z7	Fructose-bisphosphate aldolase (EC 4.1.2.13)	subsumed	VDKGVVPLAGTNGETTTQGLDGLYER	n[43]VDK[170]GVVPLAGTNGETTTQGLDGLYER	109, 111	0	0	0	0	2	0	0	0	0	0	0	0	0	0	0	0	0	0	0
K	A0A498L4Z7	Fructose-bisphosphate aldolase (EC 4.1.2.13)	subsumed	VKPCIGGVILFHETLYQKTDDGK	VKPC[160]IGGVILFHETLYQK[170]TDDGK	87	0	0	0	0	1	0	0	0	0	0	0	0	0	0	0	0	0	0	0
K	A0A498L4Z7	Fructose-bisphosphate aldolase (EC 4.1.2.13)	subsumed	VLAAVYKALSDHHVYLEGTLLKPNMVTAGHSCSQK	VLAAVYK[170]ALSDHHVYLEGTLLKPNMVTAGHSC[160]SQK	215	1	0	0	0	0	0	0	0	0	0	0	0	0	0	0	0	0	0	0
K	A0A498L4Z7	Fructose-bisphosphate aldolase (EC 4.1.2.13)	subsumed	YASICQMHGIVPIVEPEILPDGDHDLKR	YASIC[160]QMHGIVPIVEPEILPDGDHDLK[170]R	200	1	0	0	0	2	0	0	0	0	0	0	0	0	0	0	0	0	0	0
K	A0A498L4Z7	Fructose-bisphosphate aldolase (EC 4.1.2.13)	subsumed	YVSSGDKGAAAGESLFVANHAY	YVSSGDK[170]GAAAGESLFVANHAY	349	2	0	1	0	0	0	0	0	0	0	0	0	0	0	0	0	1	0	2
K	A0A498L4Z7	Fructose-bisphosphate aldolase (EC 4.1.2.13)	subsumed	YVSSGDKGAAAGESLFVANHAY	YVSSGDK[170]GAAAGESLFVAN[115]HAY	349	0	0	1	0	0	0	0	0	0	0	0	0	0	0	0	0	0	0	0
K	A0A498L557	Vitamin D-binding-like protein	representative	NYTKENVCQELK	n[43]NYTK[170]ENVC[160]QELK	24, 27	0	0	0	0	0	0	0	0	0	0	0	0	0	0	0	0	0	0	2
K	A0A498L5H4	Transketolase-like protein	canonical	AVELAANTKGICFIR	AVELAAN[115]TK[170]GIC[160]FIR	468	0	0	1	0	0	0	0	0	0	0	0	0	0	0	0	1	0	0	1
K	A0A498L5H4	Transketolase-like protein	canonical	GHAAPILYAAWAEAGYVKESELLNLR	GHAAPILYAAWAEAGYVK[170]ESELLN[115]LR[170]	92	0	0	0	0	0	0	0	0	0	0	0	0	0	0	0	1	0	0	0
K	A0A498L5H4	Transketolase-like protein	canonical	TSRPDTAVIYDAGEKFEVGK	TSRPDTAVIYDAGEK[170]FEVGK	489	0	0	0	0	0	0	0	0	0	0	0	0	0	0	0	0	0	0	1
K	A0A498L5H4	Transketolase-like protein	canonical	VIDPFTIKPLDASTIVASAR	VIDPFTIK[170]PLDASTIVASAR	541	0	0	3	0	0	0	0	0	0	0	2	0	0	3	0	7	0	0	6
K	A0A498L5H4	Transketolase-like protein	canonical	VIDPFTIKPLDASTIVASAR	n[15]VIDPFTIK[170]PLDASTIVASAR	541	0	0	0	0	0	0	1	0	0	0	0	0	0	0	0	0	0	0	0
K	A0A498L5H4	Transketolase-like protein	canonical	VITVEDHYKEGGLGEAVLSAVGEEPGIVVHR	VITVEDHYK[170]EGGLGEAVLSAVGEEPGIVVHR	567	0	0	1	0	0	0	0	0	0	0	0	0	0	0	0	1	0	0	2
K	A0A498L5J4	Actin-related 2 3 complex subunit 1A	subsumed	EVDEKPAPTPWGSK	EVDEK[170]PAPTPWGSK	319	0	0	0	2	0	0	0	0	0	0	0	0	0	0	0	0	0	0	0
K	A0A498L5J4	Actin-related 2 3 complex subunit 1A	subsumed	EVEEKPAPTPWGSK	EVEEK[170]PAPTPWGSK	681	0	0	0	0	0	0	0	0	0	0	0	0	0	0	0	0	0	0	1
K	A0A498L5R6	Troponin slow skeletal muscle-like protein	subsumed	PLGGGNKCGCCK	PLGGGNK[170]C[160]GC[160]C[160]K	8	0	0	0	1	0	0	0	0	0	0	0	0	0	0	0	0	0	0	0
K	A0A498L5S0	Troponin fast skeletal muscle-like isoform X1	canonical	ANKEIEDLKIK	ANK[170]EIEDLKIK	82	1	0	0	0	0	0	0	0	0	0	0	0	0	0	0	0	0	0	0
K	A0A498L5S0	Troponin fast skeletal muscle-like isoform X1	canonical	EAHMNENCPALSLPGSSQELQELCKK	EAHMNENC[160]PALSLPGSSQELQELC[160]K[170]K	57	1	0	0	0	0	0	0	0	0	0	0	0	0	0	0	0	0	0	0
K	A0A498L5S0	Troponin fast skeletal muscle-like isoform X1	canonical	LHQQIDKVDEERYDLEAK	LHQQIDK[170]VDEERYDLEAK	65	2	0	0	0	0	0	0	0	0	0	0	0	0	0	0	0	0	0	0
K	A0A498L5S0	Troponin fast skeletal muscle-like isoform X1	canonical	QLVANKEAHMNENCPALSLPGSSQELQELCK	QLVANK[170]EAHM[147]NENC[160]PALSLPGSSQELQELC[160]K	32	5	0	0	0	0	0	0	0	0	0	0	0	0	0	0	0	0	0	0
K	A0A498L5S0	Troponin fast skeletal muscle-like isoform X1	canonical	QLVANKEAHMNENCPALSLPGSSQELQELCKK	QLVANK[170]EAHMNENC[160]PALSLPGSSQELQELC[160]KK	32	1	0	0	0	0	0	0	0	0	0	0	0	0	0	0	0	0	0	0
K	A0A498L5S0	Troponin fast skeletal muscle-like isoform X1	canonical	QLVANKEAHMNENCPALSLPGSSQELQELCKK	n[15]QLVANK[170]EAHMNENC[160]PALSLPGSSQELQELC[160]KK	32	1	0	0	0	0	0	0	0	0	0	0	0	0	0	0	0	0	0	0
K	A0A498L5S0	Troponin fast skeletal muscle-like isoform X1	canonical	QLVANKEAHMNENCPALSLPGSSQELQELCKK	n[15]QLVAN[115]K[170]EAHMNENC[160]PALSLPGSSQELQELC[160]KK	32	1	0	0	0	0	0	0	0	0	0	0	0	0	0	0	0	0	0	0
K	A0A498L5V4	Signal transducer and activator of transcription	indistinguishable representative	KIQNIQPFTKK	KIQN[115]IQPFTK[170]K	537, 755	0	0	0	0	0	0	0	0	0	0	0	0	0	0	0	0	2	0	0
K	A0A498L5V8	Poly(U)-specific endoribonuclease-A-like isoform X2	canonical	VDHSPSPLFKQVSSTLLAKPTFK	VDHSPSPLFK[170]QVSSTLLAKPTFK	129	0	0	0	0	0	0	0	0	1	0	0	0	0	0	0	2	0	0	0
K	A0A498L5W0	Eukaryotic translation initiation factor 3 subunit A (eIF3a) (Eukaryotic translation initiation factor 3 subunit 10) (eIF-3-theta)	canonical	KLEEQERK	n[43]KLEEQERK[170]	850, 857	0	2	0	0	0	0	0	0	0	0	0	0	0	0	0	0	0	0	0
K	A0A498L5W2	Serine hydroxymethyltransferase (EC 2.1.2.1)	canonical	MMLEPLSTNDPEVFNIIKK	MMLEPLSTNDPEVFN[115]IIK[170]K	155	0	0	0	0	0	0	0	0	0	0	0	0	0	1	0	0	0	0	0
K	A0A498L5W2	Serine hydroxymethyltransferase (EC 2.1.2.1)	canonical	VLEACAIACNKNTCPGDK	VLEAC[160]AIAC[160]NK[170]NTC[160]PGDK	503	0	0	0	0	0	0	0	0	0	0	0	0	0	1	0	0	0	0	0
K	A0A498L5X3	Junction plakoglobin-like protein	canonical	AAMIVNQLTRK	AAMIVNQLT[181]RK[170]	161	0	0	0	0	0	0	0	0	0	0	0	0	0	0	0	0	1	0	0
K	A0A498L5X3	Junction plakoglobin-like protein	canonical	AAMIVNQLTRK	AAMIVN[115]QLT[181]RK[170]	161	0	5	0	0	3	0	1	0	2	19	0	0	0	0	2	5	48	0	25
K	A0A498L5X3	Junction plakoglobin-like protein	canonical	AAMIVNQLTRK	AAM[147]IVN[115]QLT[181]RK[170]	161	0	0	0	0	0	0	0	0	0	0	0	0	0	0	0	0	1	0	0
K	A0A498L605	Transport Sec61 subunit alpha-like 1	representative	FLEVIKPFCAVLPEIQKPER	FLEVIK[170]PFC[160]AVLPEIQKPER	10	0	0	0	2	0	0	0	0	0	0	0	0	0	0	0	0	0	0	0
K	A0A498L606	Myosin-7-like protein	canonical	ADIAESQVNKLR	ADIAESQVN[115]K[170]LR	156	0	0	3	0	0	0	0	0	0	0	0	0	0	0	0	0	0	0	0
K	A0A498L606	Myosin-7-like protein	canonical	LQDLVDKLQLKVK	LQDLVDKLQLK[170]VK	111	0	0	0	0	0	0	0	0	0	0	0	0	0	0	0	0	1	0	0
K	A0A498L623	E3 ubiquitin-ligase TRIM32	indistinguishable representative	ERPIPFPKIDAGFCDANGVK	ERPIPFPK[170]IDAGFC[160]DANGVK	957	0	0	0	0	0	0	0	0	0	0	0	0	0	0	0	0	0	0	2
K	A0A498L623	E3 ubiquitin-ligase TRIM32	indistinguishable representative	ERPIPFPKIDAGFCDANGVK	ERPIPFPK[170]IDAGFC[160]DAN[115]GVK	957	0	0	0	0	0	0	0	0	0	0	0	0	0	0	0	0	2	0	7
K	A0A498L623	E3 ubiquitin-ligase TRIM32	indistinguishable representative	VFIGPEYYLYESPTILALGKIKPAPQK	VFIGPEYYLYESPTILALGK[170]IKPAPQK	989	0	0	0	0	0	0	0	0	0	0	0	0	0	0	0	0	1	0	0
K	A0A498L623	E3 ubiquitin-ligase TRIM32	indistinguishable representative	VFIGPEYYLYESPTILALGKIKPAPQK	n[43]VFIGPEYYLYESPTILALGK[170]IKPAPQK	970, 989	0	0	0	0	0	0	0	0	0	0	0	0	0	0	0	0	0	0	2
K	A0A498L675	Histone H1-like protein	canonical	AKKPGPSVSDLIVK	AKK[170]PGPSVSDLIVK	25	0	0	0	0	0	0	0	0	0	0	0	0	0	0	0	0	0	0	1
K	A0A498L675	Histone H1-like protein	canonical	AKKPGPSVSDLIVKAVAASNER	AKKPGPSVSDLIVK[170]AVAASNER	36	0	0	0	0	0	0	0	0	0	0	0	0	0	0	0	0	3	0	2
K	A0A498L675	Histone H1-like protein	canonical	ALAGGGYDVEKNNSR	ALAGGGYDVEK[170]N[115]NSR	65	0	0	0	0	0	0	0	0	0	0	0	0	0	0	0	0	1	0	1
K	A0A498L675	Histone H1-like protein	canonical	ALAGGGYDVEKNNSR	ALAGGGYDVEK[170]N[115]NSR[170]	65	0	0	0	0	0	0	0	0	0	0	1	0	0	0	0	1	0	0	0
K	A0A498L675	Histone H1-like protein	canonical	GALVQTKGTGASGSFK	n[43]GALVQTK[170]GTGASGSFK	81, 87	0	0	0	0	0	0	0	0	0	0	0	0	0	0	0	2	0	0	0
K	A0A498L675	Histone H1-like protein	canonical	GTGASGSFKVSK	GTGASGSFK[170]VSK	96	0	0	0	0	0	0	0	0	0	0	0	0	0	0	0	0	1	0	0
K	A0A498L675	Histone H1-like protein	canonical	KALAGGGYDVEKNNSR	KALAGGGYDVEK[170]N[115]NSR	65	0	0	0	0	0	0	0	0	0	0	0	0	0	0	0	0	1	0	1
K	A0A498L675	Histone H1-like protein	canonical	KGALVQTKGTGASGSFK	KGALVQTK[170]GTGASGSFK	87	0	0	0	0	0	0	0	0	0	0	1	0	0	0	0	0	5	0	2
K	A0A498L675	Histone H1-like protein	canonical	KGALVQTKGTGASGSFK	n[43]KGALVQTK[170]GTGASGSFK	80, 87	0	0	0	0	0	0	0	0	0	0	0	0	0	0	0	0	2	0	0
K	A0A498L675	Histone H1-like protein	canonical	KPGPSVSDLIVKAVAASNER	KPGPSVSDLIVK[170]AVAASNER	36	0	0	1	0	0	0	0	0	0	0	0	0	0	0	0	0	2	0	1
K	A0A498L684	Myofibril-bound serine ase	canonical	DSCQGDSGGPVVCNGK	DSC[160]QGDSGGPVVC[160]NGK[170]	147	0	0	0	0	0	0	0	0	2	0	0	0	0	0	0	0	0	0	0
K	A0A498L684	Myofibril-bound serine ase	canonical	DSCQGDSGGPVVCNGK	DSC[160]QGDSGGPVVC[160]N[115]GK[170]	147	0	0	0	0	0	0	0	0	3	0	0	0	0	0	0	0	0	0	0
K	A0A498L684	Myofibril-bound serine ase	canonical	GGKDSCQGDGGGPVVCNGK	n[15]GGK[170]DSC[160]QGDGGGPVVC[160]NGK	191	0	0	0	0	0	0	1	0	0	0	0	0	0	0	0	0	0	0	0
K	A0A498L684	Myofibril-bound serine ase	canonical	GGKDSCQGDGGGPVVCNGKLQGVVSFGR	GGKDSC[160]QGDGGGPVVC[160]NGK[170]LQGVVSFGR	207	0	0	0	0	0	0	1	0	0	0	0	0	0	0	0	0	0	0	0
K	A0A498L6A2	Annexin	subsumed	AMKGLGTDEDAILQLLTAR	AMK[170]GLGTDEDAILQLLTAR	30	0	0	0	0	0	0	0	0	0	0	0	0	0	0	0	0	0	0	1
K	A0A498L6A2	Annexin	subsumed	DAIKGAGTDEKVLIEILASR	DAIKGAGTDEK[170]VLIEILASR	109	0	0	2	0	0	0	0	0	0	0	0	0	0	0	0	0	0	0	1
K	A0A498L6A2	Annexin	subsumed	DAIKGAGTDEKVLIEILASR	DAIK[170]GAGTDEKVLIEILASR	102	0	0	0	0	0	0	0	0	0	0	0	0	0	0	0	0	0	0	2
K	A0A498L6A2	Annexin	subsumed	GAGTDEKVLIEILASR	GAGTDEK[170]VLIEILASR	109	0	0	0	0	0	0	0	0	0	0	0	0	0	0	0	0	0	0	2
K	A0A498L6A2	Annexin	subsumed	QEHDHDLEKDVTGDTGGHFQR	QEHDHDLEK[170]DVTGDTGGHFQR	140	0	0	2	0	0	0	0	0	0	0	0	0	0	0	0	0	0	0	0
K	A0A498L6A2	Annexin	subsumed	QEHDHDLEKDVTGDTGGHFQR	n[15]QEHDHDLEK[170]DVTGDTGGHFQR	140	0	0	0	0	0	0	0	1	0	0	0	0	0	0	0	0	0	0	0
K	A0A498L6A2	Annexin	subsumed	QQGIQENLIQSDAQALFAAGEQKYGTDEGQFITILGNR	QQGIQENLIQSDAQALFAAGEQK[170]YGTDEGQFITILGNR	185	0	0	0	0	0	0	0	0	0	0	0	0	0	0	0	0	0	0	2
K	A0A498L6A2	Annexin	subsumed	SLYKQEHDHDLEK	n[43]SLYK[170]QEHDHDLEK	128, 131	0	0	0	0	0	0	0	0	0	0	0	0	0	0	0	0	0	0	2
K	A0A498L6A2	Annexin	subsumed	SLYKQEHDHDLEKDVTGDTGGHFQR	SLYKQEHDHDLEK[170]DVTGDTGGHFQR	140	0	0	1	0	0	0	0	0	0	0	0	0	0	0	0	0	0	0	3
K	A0A498L6A2	Annexin	subsumed	SLYKQEHDHDLEKDVTGDTGGHFQR	SLYK[170]QEHDHDLEKDVTGDTGGHFQR	131	0	0	0	0	0	0	0	0	0	0	0	0	0	0	0	0	0	0	2
K	A0A498L6A2	Annexin	subsumed	SLYKQEHDHDLEKDVTGDTGGHFQR	n[43]SLYKQEHDHDLEK[170]DVTGDTGGHFQR	128, 140	0	0	0	0	0	0	0	0	0	0	0	0	0	0	0	0	0	0	4
K	A0A498L6A2	Annexin	subsumed	SLYKQEHDHDLEKDVTGDTGGHFQR	n[43]SLYK[142]QEHDHDLEK[170]DVTGDTGGHFQR	128, 140	0	0	0	0	0	0	0	4	0	0	0	0	0	0	0	0	0	0	0
K	A0A498L6A2	Annexin	subsumed	SLYKQEHDHDLEKDVTGDTGGHFQR	n[43]SLYK[170]QEHDHDLEKDVTGDTGGHFQR	128, 131	0	0	4	0	2	0	0	2	0	2	0	0	0	0	0	0	0	0	6
K	A0A498L6A2	Annexin	subsumed	SPNEVNEIKSLYK	SPNEVN[115]EIK[170]SLYK	127	0	0	0	0	0	0	0	0	0	0	0	0	0	0	0	0	0	0	1
K	A0A498L6B4	Eukaryotic translation initiation factor 4E transporter isoform X1	canonical	ANIDLKPLLSNLNVNK	ANIDLK[170]PLLSNLNVNK	384	0	0	0	0	0	0	0	0	0	0	0	0	0	2	0	0	0	0	0
K	A0A498L6B4	Eukaryotic translation initiation factor 4E transporter isoform X1	canonical	LVSSMKASGTLPTHPK	n[43]LVSSMK[170]ASGTLPTHPK	472, 477	0	0	0	0	0	0	0	0	0	0	0	0	0	2	0	0	0	0	0
K	A0A498L6B4	Eukaryotic translation initiation factor 4E transporter isoform X1	canonical	MEKDENGENMVETVKDSVVTSAYR	n[43]MEK[170]DENGENMVETVKDSVVTSAYR	1, 3	0	0	0	0	0	0	0	0	0	0	0	0	0	4	0	0	0	0	0
K	A0A498L6B4	Eukaryotic translation initiation factor 4E transporter isoform X1	canonical	MEKDENGENMVETVKDSVVTSAYR	n[43]M[147]EK[170]DENGENMVETVKDSVVTSAYR	1, 3	0	0	0	0	0	0	0	0	0	0	0	0	0	10	0	0	0	0	0
K	A0A498L6B4	Eukaryotic translation initiation factor 4E transporter isoform X1	canonical	MEKDENGENMVETVKDSVVTSAYR	n[43]M[147]EK[170]DENGENM[147]VETVKDSVVTSAYR	1, 3	0	0	0	0	0	0	0	0	0	0	0	0	0	2	0	0	0	0	0
K	A0A498L6B4	Eukaryotic translation initiation factor 4E transporter isoform X1	canonical	MEKDENGENMVETVKDSVVTSAYR	n[43]M[147]EK[170]DENGEN[115]MVETVKDSVVTSAYR	1, 3	0	0	0	0	0	0	0	0	0	0	0	0	0	2	0	0	0	0	0
K	A0A498L6B4	Eukaryotic translation initiation factor 4E transporter isoform X1	canonical	MEKDENGENMVETVKDSVVTSAYR	n[43]M[147]EK[170]DEN[115]GENMVETVKDSVVTSAYR	1, 3	0	0	0	0	0	0	0	0	0	0	0	0	0	2	0	0	0	0	0
K	A0A498L6B4	Eukaryotic translation initiation factor 4E transporter isoform X1	canonical	MEKDENGENMVETVKDSVVTSAYR	n[43]M[147]EK[170]DEN[115]GEN[115]MVETVKDSVVTSAYR	1, 3	0	0	0	0	0	0	0	0	0	0	0	0	0	4	0	0	0	0	0
K	A0A498L6B4	Eukaryotic translation initiation factor 4E transporter isoform X1	canonical	RPVSPLENKENESLR	RPVSPLENK[170]ENESLR	138	0	0	0	0	0	0	0	0	0	0	0	0	0	3	0	0	0	0	0
K	A0A498L6B4	Eukaryotic translation initiation factor 4E transporter isoform X1	canonical	RPVSPLENKENESLR	RPVSPLEN[115]K[170]ENESLR	138	0	0	0	0	0	0	0	0	0	0	0	0	0	2	0	0	0	0	0
K	A0A498L6B4	Eukaryotic translation initiation factor 4E transporter isoform X1	canonical	SRDDPGSRPGSKEETVNSHNSQEDGPPSPSSFLDDVDTSGPQTGGVK	SRDDPGSRPGSK[170]EETVNSHN[115]SQEDGPPSPSSFLDDVDTSGPQTGGVK	690	0	0	0	0	0	0	0	0	0	0	0	0	0	3	0	0	0	0	0
K	A0A498L6B4	Eukaryotic translation initiation factor 4E transporter isoform X1	canonical	SRDDPGSRPGSKEETVNSHNSQEDGPPSPSSFLDDVDTSGPQTGGVK	SRDDPGSRPGSK[170]EETVN[115]SHNSQEDGPPSPSSFLDDVDTSGPQTGGVK	690	0	0	0	0	0	0	0	0	0	0	0	0	0	1	0	0	0	0	0
K	A0A498L6B4	Eukaryotic translation initiation factor 4E transporter isoform X1	canonical	SRDDPGSRPGSKEETVNSHNSQEDGPPSPSSFLDDVDTSGPQTGGVK	SRDDPGSRPGSK[170]EETVN[115]SHN[115]SQEDGPPSPSSFLDDVDTSGPQTGGVK	690	0	0	0	0	0	0	0	0	0	0	0	0	0	5	0	0	0	0	0
K	A0A498L6B4	Eukaryotic translation initiation factor 4E transporter isoform X1	canonical	SRDDPGSRPGSKEETVNSHNSQEDGPPSPSSFLDDVDTSGPQTGGVK	SRDDPGSR[170]PGSK[170]EETVN[115]SHNSQEDGPPSPSSFLDDVDTSGPQTGGVK	690	0	0	0	0	0	0	0	0	0	0	0	0	0	2	0	0	0	0	0
K	A0A498L6B4	Eukaryotic translation initiation factor 4E transporter isoform X1	canonical	SRDDPGSRPGSKEETVNSHNSQEDGPPSPSSFLDDVDTSGPQTGGVK	SRDDPGSR[170]PGSK[170]EETVN[115]SHN[115]SQEDGPPSPSSFLDDVDTSGPQTGGVK	690	0	0	0	0	0	0	0	0	0	0	0	0	0	11	0	0	0	0	0
K	A0A498L6F0	Alpha-1-syntrophin	indistinguishable representative	LVHSGPGKSSSVHDSELTFGLR	LVHSGPGK[170]SSSVHDSELTFGLR	242	0	0	0	0	0	0	0	0	0	0	0	0	0	0	0	1	0	0	0
K	A0A498L6K6	14-3-3 gamma-B	canonical	NLLSVAYKNVVGAR	n[43]NLLSVAYK[170]N[115]VVGAR	43, 50	0	0	0	0	0	0	0	0	0	0	0	0	0	0	0	0	0	0	2
K	A0A498L6K6	14-3-3 gamma-B	canonical	SVTELNEALSNEERNLLSVAYK	SVTELNEALSN[115]EER[170]NLLSVAYK[170]	50	0	0	0	0	0	0	1	0	0	0	0	0	0	0	0	0	0	0	0
K	A0A498L6K6	14-3-3 gamma-B	canonical	SVTELNEALSNEERNLLSVAYKNVVGAR	SVTELNEALSNEER[170]N[115]LLSVAYK[170]NVVGAR	50	0	0	0	0	0	0	1	0	0	0	0	0	0	0	0	0	0	0	0
K	A0A498L6K6	14-3-3 gamma-B	canonical	YDDMAAAMK	YDDM[147]AAAM[147]K[170]	28	0	0	0	0	1	0	0	0	0	0	0	0	0	0	0	0	0	0	0
K	A0A498L6L1	40S ribosomal protein S12	canonical	AEEGIAAGGVMDVNTALPEVLKTALIHDGLAR	n[43]AEEGIAAGGVMDVNTALPEVLK[170]TALIHDGLAR	2, 23	0	0	0	0	0	0	0	0	0	0	0	0	0	0	0	2	0	0	0
K	A0A498L6L1	40S ribosomal protein S12	canonical	AEEGIAAGGVMDVNTALPEVLKTALIHDGLAR	n[43]AEEGIAAGGVMDVN[115]TALPEVLK[170]TALIHDGLAR	2, 23	0	0	2	0	0	0	0	0	0	0	0	0	0	0	0	6	0	0	0
K	A0A498L6L1	40S ribosomal protein S12	canonical	AEEGIAAGGVMDVNTALPEVLKTALIHDGLAR	n[43]AEEGIAAGGVM[147]DVNTALPEVLK[170]TALIHDGLAR	2, 23	0	0	0	0	0	0	0	0	0	0	0	0	0	0	0	4	0	0	0
K	A0A498L6L1	40S ribosomal protein S12	canonical	AEEGIAAGGVMDVNTALPEVLKTALIHDGLAR	n[43]AEEGIAAGGVM[147]DVN[115]TALPEVLK[170]TALIHDGLAR	2, 23	0	0	0	0	0	0	0	0	0	0	0	0	0	0	0	2	0	0	0
K	A0A498L6L4	Alpha-2-macroglobulin-like protein	canonical	AQKYIFIDPQIIQSAK	AQK[170]YIFIDPQIIQSAK	356	0	0	0	0	0	0	0	0	0	0	0	0	0	0	0	0	1	0	0
K	A0A498L6L4	Alpha-2-macroglobulin-like protein	canonical	SLLVQAEGTEKTETYSWLLCPK	SLLVQAEGTEK[170]TETYSWLLC[160]PK	218	0	0	0	0	0	0	0	0	0	0	0	0	0	0	0	0	0	0	1
K	A0A498L6M0	Dehydrogenase reductase SDR family member 11-like protein	canonical	LYCDKPEMADATYNR	LYC[160]DK[170]PEMADATYNR	208	0	0	0	0	0	0	0	0	0	0	0	0	0	0	0	1	0	0	0
K	A0A498L6M3	Type I cytoskeletal 18-like protein	canonical	DYSKYNTILDDLR	DYSK[170]YNTILDDLR	136	0	0	0	0	0	0	0	0	0	0	0	0	0	0	0	1	0	0	6
K	A0A498L6M3	Type I cytoskeletal 18-like protein	canonical	DYSKYNTILDDLRK	DYSK[170]YNTILDDLRK	136	0	0	0	0	0	0	0	0	0	0	0	0	0	0	0	0	0	0	1
K	A0A498L6M3	Type I cytoskeletal 18-like protein	canonical	DYSKYNTILDDLRK	n[43]DYSK[170]YNTILDDLRK	133, 136	0	0	0	0	0	0	0	0	0	0	0	0	0	2	0	0	0	0	4
K	A0A498L6M3	Type I cytoskeletal 18-like protein	canonical	IREALEKGGPETR	IREALEK[170]GGPETR	126	0	0	1	0	0	0	0	0	0	0	0	0	0	2	0	0	0	0	5
K	A0A498L6M3	Type I cytoskeletal 18-like protein	canonical	ITEQGQEYEALLNMKMK	ITEQGQEYEALLN[115]MK[170]MK	378	0	0	0	0	0	0	0	0	0	0	0	0	0	0	0	0	0	0	2
K	A0A498L6M3	Type I cytoskeletal 18-like protein	canonical	KKVFDATLDNAR	KK[170]VFDATLDNAR	147	0	0	0	0	0	0	0	0	0	0	0	0	0	0	0	0	0	0	2
K	A0A498L6M3	Type I cytoskeletal 18-like protein	canonical	LEAEISTYKK	n[43]LEAEISTYK[170]K	381, 389	0	0	0	0	0	0	0	0	0	0	0	0	0	0	0	0	0	0	2
K	A0A498L6M3	Type I cytoskeletal 18-like protein	canonical	QSVEGDIAGLKKVIDDTNIGR	Q[111]SVEGDIAGLK[170]K[170]VIDDTNIGR	194, 195	0	0	0	0	0	0	0	0	0	0	0	0	0	0	0	0	0	0	2
K	A0A498L6M3	Type I cytoskeletal 18-like protein	canonical	RLEQENSKLEMK	RLEQENSKLEM[147]K[170]	119	0	0	0	0	0	0	0	0	0	0	0	0	0	2	0	0	0	0	0
K	A0A498L6M3	Type I cytoskeletal 18-like protein	canonical	RLEQENSKLEMK	RLEQENSK[170]LEMK	115	0	0	0	0	0	0	0	0	0	0	0	0	0	0	0	0	0	0	8
K	A0A498L6M3	Type I cytoskeletal 18-like protein	canonical	RLEQENSKLEMK	RLEQENSK[170]LEM[147]K	115	0	0	0	0	0	0	0	0	0	0	0	0	0	0	0	0	0	0	2
K	A0A498L6M3	Type I cytoskeletal 18-like protein	canonical	SKITEQGQEYEALLNMK	SKITEQGQEYEALLNM[147]K[170]	378	0	0	1	0	0	0	0	0	0	0	0	0	0	0	0	0	0	0	0
K	A0A498L6M3	Type I cytoskeletal 18-like protein	canonical	SQIAQSGVQVDVDAPKGQDMSQVMEEMR	SQIAQSGVQVDVDAPK[170]GQDMSQVMEEMR	249	0	0	0	0	0	0	0	0	0	0	0	0	0	0	0	0	0	0	3
K	A0A498L6M3	Type I cytoskeletal 18-like protein	canonical	VSSAGMGAGGAGSFMGSAASAGSILGNEKGQMQNLNDR	VSSAGMGAGGAGSFMGSAASAGSILGN[115]EK[170]GQMQNLNDR	89	0	0	0	0	0	0	0	0	0	0	0	0	0	0	0	0	0	0	1
K	A0A498L6T1	Calsequestrin	canonical	FFATFSPK	FFATFSPK[170]	206	1	0	1	0	5	0	0	0	0	0	1	0	0	0	0	0	0	0	0
K	A0A498L6T1	Calsequestrin	canonical	GFHNVEEDIKLVGFFK	GFHNVEEDIK[170]LVGFFK	170	1	0	0	0	0	0	0	0	0	0	0	0	0	0	0	0	0	0	0
K	A0A498L6U5	2,4-dienoyl-mitochondrial-like isoform X2	canonical	MQAAKVSDTPVEFVVEYLLK	n[43]M[147]QAAK[170]VSDTPVEFVVEYLLK	1, 5	0	0	0	0	0	0	0	0	0	0	0	0	0	0	0	2	0	0	0
K	A0A498L6V3	60S ribosomal protein L3	subsumed	VVKNNASTEYDLSNK	n[43]VVK[170]NNASTEYDLSNK	285, 287	0	0	0	0	0	0	0	0	0	0	0	0	0	0	0	2	0	0	0
K	A0A498L6X4	Cytolysin Src-1-like protein	indistinguishable representative	TESAEAAAANVSSKR	n[43]TESAEAAAAN[115]VSSK[170]R	22, 35	0	0	0	0	0	0	0	0	0	2	0	0	0	0	0	0	0	0	0
K	A0A498L6Y8	Retinal dehydrogenase 2	canonical	VAFTGSTEVGK	VAFTGSTEVGK[170]	234	0	0	0	1	0	0	0	0	0	0	0	0	0	0	0	0	0	0	0
K	A0A498L733	Myosin-binding fast-type-like isoform X2	canonical	CTLADDAAYECVVGTDK	C[143]TLADDAAYEC[160]VVGTDK[170]	308	0	0	0	0	0	0	0	0	0	1	0	0	0	0	0	0	0	0	0
K	A0A498L733	Myosin-binding fast-type-like isoform X2	canonical	CTLADDAAYECVVGTDK	C[160]TLADDAAYEC[160]VVGTDK[170]	308	0	0	1	0	0	0	0	0	0	0	0	0	0	0	0	0	0	0	0
K	A0A498L733	Myosin-binding fast-type-like isoform X2	canonical	IGAGGLDGYIIEFCKEGETEWHPANTDLVER	IGAGGLDGYIIEFC[160]K[170]EGETEW[202]HPANTDLVER	751	2	0	0	0	0	0	0	0	0	0	0	0	0	0	0	0	0	0	0
K	A0A498L733	Myosin-binding fast-type-like isoform X2	canonical	VFAINGIGMSAPSLNSKPFMPIAPTSEPTK	VFAINGIGM[147]SAPSLNSK[170]PFMPIAPTSEPTK	703	6	0	0	0	0	0	0	0	0	0	0	0	0	0	0	0	0	0	0
K	A0A498L733	Myosin-binding fast-type-like isoform X2	canonical	VFAINGIGMSAPSLNSKPFMPIAPTSEPTK	VFAIN[115]GIGM[147]SAPSLNSK[170]PFMPIAPTSEPTK	703	2	0	0	0	0	0	0	0	0	0	0	0	0	0	0	0	0	0	0
K	A0A498L783	Transporter	subsumed	GLKSLTLLDVSSNQLKK	n[43]GLK[170]SLTLLDVSSNQLKK	1556, 1558	0	0	2	0	0	0	0	0	0	0	0	0	0	0	0	0	0	0	0
K	A0A498L783	Transporter	subsumed	MKYVYLQHNQITSVR	n[43]M[147]K[170]YVYLQHNQITSVR	1444, 1445	0	0	2	0	0	0	0	0	0	0	0	0	0	0	0	0	0	0	0
K	A0A498L783	Transporter	subsumed	SLTLLDVSSNQLKK	SLTLLDVSSN[115]QLK[142]K[170]	1572	0	0	1	0	0	0	0	0	0	0	0	0	0	0	0	0	0	0	0
K	A0A498L783	Transporter	subsumed	SLTLLDVSSNQLKK	SLTLLDVSSN[115]QLK[170]K	1571	0	0	10	0	0	0	0	0	0	0	0	0	0	0	0	0	0	0	0
K	A0A498L7C3	Sorbitol dehydrogenase-like protein	canonical	IGDYVLKQPMVLGHEASGR	IGDYVLK[170]QPMVLGHEASGR	59	0	0	0	0	0	0	0	0	1	0	0	0	0	0	0	2	0	0	0
K	A0A498L7C3	Sorbitol dehydrogenase-like protein	canonical	VVKVGSAVTHLK	VVK[170]VGSAVTHLK	74	0	0	0	0	0	0	0	0	0	0	0	0	0	0	0	1	0	0	0
K	A0A498L7E0	ATP-binding cassette sub-family B member mitochondrial	canonical	IQDDKLQFQIEAFR	IQDDK[170]LQFQIEAFR	296	0	0	0	0	0	0	0	0	0	0	0	0	0	0	0	0	0	1	0
K	A0A498L7I0	Type I cytoskeletal 18	canonical	KKIFDATTNNAR	KK[170]IFDATTNNAR	146	0	0	0	0	0	0	0	0	0	0	0	0	0	0	0	0	0	0	1
K	A0A498L7I0	Type I cytoskeletal 18	canonical	LLDGGDFKLQDALEEQK	LLDGGDFK[170]LQDALEEQK	397	0	0	1	0	0	0	0	0	0	0	0	0	0	0	0	0	0	0	2
K	A0A498L7I0	Type I cytoskeletal 18	canonical	LLDGGDFKLQDALEEQK	n[43]LLDGGDFK[170]LQDALEEQK	390, 397	0	0	0	0	0	0	0	0	0	0	0	0	0	0	0	0	0	0	2
K	A0A498L7I0	Type I cytoskeletal 18	canonical	LLDGGDFKLQDALEEQKK	n[43]LLDGGDFK[170]LQDALEEQKK	390, 397	0	0	2	0	0	0	0	0	0	0	0	0	0	0	0	0	0	0	2
K	A0A498L7I0	Type I cytoskeletal 18	canonical	MALKNQEELKAWHESQISEVQVQVSQNTEALQGAR	M[147]ALK[170]N[115]QEELKAWHESQISEVQVQVSQNTEALQGAR	269	0	0	1	0	0	0	0	0	0	0	0	0	0	0	0	0	0	0	0
K	A0A498L7I0	Type I cytoskeletal 18	canonical	NQEELKAWHESQISEVQVQVSQNTEALQGAR	NQEELK[170]AWHESQISEVQVQVSQNTEALQGAR	275	0	0	0	0	0	0	0	0	0	0	0	0	0	0	0	0	0	0	2
K	A0A498L7I0	Type I cytoskeletal 18	canonical	NQEELKAWHESQISEVQVQVSQNTEALQGAR	NQEELK[170]AW[202]HESQISEVQVQVSQNTEALQGAR	275	0	0	1	1	0	0	0	1	0	0	0	0	0	2	0	0	0	0	0
K	A0A498L7I0	Type I cytoskeletal 18	canonical	NQISQSGVQVDVDAPKGQDLAQIMEEIR	NQISQSGVQVDVDAPK[170]GQDLAQIMEEIR	248	0	0	0	0	0	0	0	0	0	0	0	0	0	1	0	4	0	0	2
K	A0A498L7I0	Type I cytoskeletal 18	canonical	QIQTLEIELESQKNLK	QIQTLEIELESQK[170]N[115]LK	321	0	0	0	0	0	0	0	0	2	0	0	0	0	0	0	0	0	0	2
K	A0A498L7I0	Type I cytoskeletal 18	canonical	QIQTLEIELESQKNLK	Q[111]IQTLEIELESQK[170]N[115]LK	321	0	0	0	0	0	0	0	0	0	0	0	0	0	0	0	0	0	0	4
K	A0A498L7I0	Type I cytoskeletal 18	canonical	VMTVTQTLVDGKVVSSSTETK	VMTVTQTLVDGK[170]VVSSSTETK	421	0	0	0	0	0	0	0	0	0	0	0	0	0	0	0	1	0	0	1
K	A0A498L7I0	Type I cytoskeletal 18	canonical	VMTVTQTLVDGKVVSSSTETK	VM[147]TVTQTLVDGK[170]VVSSSTETK	421	0	0	1	0	0	0	0	0	0	0	0	0	0	0	0	0	0	0	1
K	A0A498L7I0	Type I cytoskeletal 18	canonical	VMTVTQTLVDGKVVSSSTETKER	VM[147]TVTQTLVDGK[170]VVSSSTETKER	421	0	0	1	0	0	0	0	0	0	0	0	0	0	0	0	0	0	0	0
K	A0A498L7I0	Type I cytoskeletal 18	canonical	VMTVTQTLVDGKVVSSSTETKER	n[15]VMTVTQTLVDGK[170]VVSSSTETKER	421	0	0	0	0	0	0	0	0	0	0	0	0	0	2	0	1	0	0	0
K	A0A498L7I0	Type I cytoskeletal 18	canonical	VMTVTQTLVDGKVVSSSTETKER	n[43]VMTVTQTLVDGK[170]VVSSSTETKER	410, 421	0	0	0	0	0	0	0	0	0	0	0	0	0	0	0	0	0	0	2
K	A0A498L7Q6	Zygote arrest 1-like protein	canonical	TPSISPLKDNLPSTPVNSVR	TPSISPLK[170]DN[115]LPSTPVNSVR	120	0	0	0	0	0	0	0	0	0	0	0	0	0	2	0	0	0	0	0
K	A0A498L7R5	Malate dehydrogenase (EC 1.1.1.37)	canonical	ATVTGYMGADQLGAALKGCEVVVIPAGVPR	ATVTGYM[147]GADQLGAALK[170]GC[160]EVVVIPAGVPR	83	0	0	0	0	0	0	0	0	0	0	0	0	0	0	0	1	0	0	0
K	A0A498L7R5	Malate dehydrogenase (EC 1.1.1.37)	canonical	FTFSLLDAMNGKEGVVECAFVR	FTFSLLDAM[147]NGK[170]EGVVEC[160]AFVR	261	0	0	0	0	0	0	0	0	0	3	0	0	0	0	0	0	0	0	0
K	A0A498L7R5	Malate dehydrogenase (EC 1.1.1.37)	canonical	FTFSLLDAMNGKEGVVECAFVR	n[15]FTFSLLDAMN[115]GK[170]EGVVEC[160]AFVR	261	0	0	0	0	0	0	0	0	0	1	0	0	0	0	0	0	0	0	0
K	A0A498L7R5	Malate dehydrogenase (EC 1.1.1.37)	canonical	KGEDFVANMK	KGEDFVANMK[170]	330	0	0	0	0	0	0	0	0	0	0	0	0	0	0	0	0	1	0	0
K	A0A498L7R5	Malate dehydrogenase (EC 1.1.1.37)	canonical	KGEDFVANMK	KGEDFVAN[115]MK[170]	330	0	0	0	0	1	0	0	0	0	0	0	0	0	0	0	0	0	0	0
K	A0A498L7R5	Malate dehydrogenase (EC 1.1.1.37)	canonical	KGEDFVANMK	n[43]KGEDFVANMK[170]	321, 330	0	0	0	0	0	0	0	0	0	0	2	0	0	0	0	0	0	0	0
K	A0A498L7R5	Malate dehydrogenase (EC 1.1.1.37)	canonical	LSAFEEKLVAEAMDELKGSIK	LSAFEEK[170]LVAEAMDELKGSIK	306	0	0	0	0	0	0	0	0	0	0	0	0	0	0	0	0	0	0	2
K	A0A498L7R5	Malate dehydrogenase (EC 1.1.1.37)	canonical	NLGLGKLSAFEEK	NLGLGK[170]LSAFEEK	299	0	0	0	0	0	0	0	0	0	0	0	0	0	0	0	0	1	0	0
K	A0A498L7R5	Malate dehydrogenase (EC 1.1.1.37)	canonical	SEETDCKYFSTPLLLGK	SEETDC[160]K[170]YFSTPLLLGK	278	0	0	0	0	0	0	0	0	0	0	1	0	0	0	0	0	0	0	0
K	A0A498L7R5	Malate dehydrogenase (EC 1.1.1.37)	canonical	SEETDCKYFSTPLLLGKNGIEK	SEETDC[160]K[170]YFSTPLLLGKN[115]GIEK	278	0	0	0	0	0	0	0	0	0	0	0	0	0	0	0	0	1	0	0
K	A0A498L7R5	Malate dehydrogenase (EC 1.1.1.37)	canonical	TIIPLISQCTPKVEFPADQLSALTGR	TIIPLISQC[160]TPK[170]VEFPADQLSALTGR	207	0	0	3	0	0	0	0	0	0	0	0	0	0	0	0	0	0	0	1
K	A0A498L7R5	Malate dehydrogenase (EC 1.1.1.37)	canonical	VAVLGASGGIGQPLSLLLKNSPLVSELSLYDIAHTPGVAADLSHIETR	VAVLGASGGIGQPLSLLLK[170]N[115]SPLVSELSLYDIAHTPGVAADLSHIETR	37	0	0	0	0	0	0	0	0	0	0	0	0	0	0	0	0	0	0	1
K	A0A498L7R5	Malate dehydrogenase (EC 1.1.1.37)	canonical	VNVPVVGGHAGKTIIPLISQCTPK	VNVPVVGGHAGK[170]TIIPLISQC[160]TPK	195	0	0	0	0	0	0	0	0	0	0	0	0	0	0	0	0	1	0	0
K	A0A498L7R7	Serine/threonine-protein kinase receptor (EC 2.7.11.30)	canonical	GQQYILEKGEYPDFQR	GQQYILEK[170]GEYPDFQR	66	0	0	1	0	0	0	0	0	0	0	0	0	0	0	0	0	0	0	0
K	A0A498L7R7	Serine/threonine-protein kinase receptor (EC 2.7.11.30)	canonical	IVFYEGKCFTGQR	n[43]IVFYEGK[170]C[160]FTGQR	8, 14	0	0	2	0	0	0	0	0	0	0	0	0	0	0	0	0	0	0	0
K	A0A498L7R7	Serine/threonine-protein kinase receptor (EC 2.7.11.30)	canonical	VESGAWVCFDHPDFKGQQYILEKGEYPDFQR	VESGAWVC[160]FDHPDFKGQQYILEK[170]GEYPDFQR	66	0	0	1	0	0	0	0	0	0	0	0	0	0	0	0	0	0	0	0
K	A0A498L7R7	Serine/threonine-protein kinase receptor (EC 2.7.11.30)	canonical	VESGAWVCFDHPDFKGQQYILEKGEYPDFQR	VESGAWVC[160]FDHPDFK[170]GQQYILEKGEYPDFQR	58	0	0	1	0	0	0	0	0	0	0	0	0	0	0	0	0	0	0	0
K	A0A498L7R7	Serine/threonine-protein kinase receptor (EC 2.7.11.30)	canonical	VESGAWVCFDHPDFKGQQYILEKGEYPDFQR	n[43]VESGAWVC[160]FDHPDFK[170]GQQYILEKGEYPDFQR	44, 58	0	0	2	0	0	0	0	0	0	0	0	0	0	0	0	0	0	0	0
K	A0A498L7W5	Mitochondrial ornithine transporter 1-like protein	subsumed	ALKEASLVIAESPSALQLR	ALK[170]EASLVIAESPSALQLR	308	0	0	0	0	0	0	0	0	0	0	0	0	0	0	0	0	0	0	1
K	A0A498L810	Cytoplasmic 1	marginally distinguished	AVFPSIVGRPRHQGVMVGMGQKDSYVGDEAQSK	n[43]AVFPSIVGR[170]PRHQGVM[147]VGMGQK[170]DSYVGDEAQSK	34, 55	2	0	0	0	0	0	0	0	0	0	0	0	0	0	0	0	0	0	0
K	A0A498L810	Cytoplasmic 1	marginally distinguished	CDVDIRKDLYANTVLSGGTTMYPGIADR	C[160]DVDIRK[170]DLYANTVLSGGTTM[147]YPGIADR	296	0	0	0	0	1	0	0	0	0	0	0	0	0	0	0	0	0	0	0
K	A0A498L810	Cytoplasmic 1	marginally distinguished	CDVDIRKDLYANTVLSGGTTMYPGIADR	C[160]DVDIRK[170]DLYAN[115]TVLSGGTTM[147]YPGIADR	296	0	0	0	0	1	0	0	0	0	0	0	0	0	0	0	0	0	0	0
K	A0A498L810	Cytoplasmic 1	marginally distinguished	CDVDIRKDLYANTVLSGGTTMYPGIADR	C[160]DVDIR[170]K[170]DLYANTVLSGGTTMYPGIADR	296	0	0	0	2	0	0	0	0	0	2	0	0	0	0	0	0	0	0	0
K	A0A498L810	Cytoplasmic 1	marginally distinguished	CDVDIRKDLYANTVLSGGTTMYPGIADR	C[160]DVDIR[170]K[170]DLYAN[115]TVLSGGTTMYPGIADR	296	0	0	0	0	0	0	0	0	0	1	0	0	0	0	0	0	0	0	0
K	A0A498L810	Cytoplasmic 1	marginally distinguished	CPESLFQPSFLGMESCGIHETTFNSIMK	C[143]PESLFQPSFLGM[147]ESC[160]GIHETTFNSIMK[170]	289	0	0	0	1	1	0	0	0	0	0	1	0	0	0	0	0	0	0	0
K	A0A498L810	Cytoplasmic 1	marginally distinguished	CPESLFQPSFLGMESCGIHETTFNSIMK	C[143]PESLFQPSFLGM[147]ESC[160]GIHETTFNSIM[147]K[170]	289	0	0	0	0	0	0	0	0	0	0	0	0	0	0	0	1	0	0	0
K	A0A498L810	Cytoplasmic 1	marginally distinguished	CPESLFQPSFLGMESCGIHETTFNSIMK	C[160]PESLFQPSFLGMESC[160]GIHETTFNSIM[147]K[170]	289	0	0	0	0	2	0	0	0	0	0	0	0	0	0	0	0	0	0	0
K	A0A498L810	Cytoplasmic 1	marginally distinguished	CPESLFQPSFLGMESCGIHETTFNSIMK	C[160]PESLFQPSFLGM[147]ESC[160]GIHETTFNSIMK[170]	289	0	0	3	2	0	0	1	1	0	0	0	0	0	0	0	1	0	0	1
K	A0A498L810	Cytoplasmic 1	marginally distinguished	CPESLFQPSFLGMESCGIHETTFNSIMK	C[160]PESLFQPSFLGM[147]ESC[160]GIHETTFNSIM[147]K[170]	289	0	0	0	0	0	0	0	0	0	0	1	0	0	0	0	0	0	0	0
K	A0A498L810	Cytoplasmic 1	marginally distinguished	CPESLFQPSFLGMESCGIHETTFNSIMKCDVDIR	C[160]PESLFQPSFLGMESC[160]GIHETTFNSIM[147]K[170]C[160]DVDIR	289	0	0	0	0	0	0	0	0	0	0	1	0	0	0	0	0	0	0	0
K	A0A498L810	Cytoplasmic 1	marginally distinguished	DIKEKLCYVALDFEQEMGTAASSSSLEK	DIK[170]EKLC[160]YVALDFEQEMGTAASSSSLEK	218	0	0	0	1	0	0	0	0	0	0	0	0	0	0	0	0	0	0	0
K	A0A498L810	Cytoplasmic 1	marginally distinguished	DIKEKLCYVALDFEQEMGTAASSSSLEK	n[43]DIK[170]EKLC[160]YVALDFEQEMGTAASSSSLEK	216, 218	0	0	6	8	0	0	0	2	0	0	0	0	0	0	0	0	0	0	0
K	A0A498L810	Cytoplasmic 1	marginally distinguished	DIKEKLCYVALDFEQEMGTAASSSSLEK	n[43]DIK[170]EK[170]LC[160]YVALDFEQEMGTAASSSSLEK	216, 218, 220	0	0	0	0	0	0	0	0	0	0	0	0	0	0	0	0	0	0	3
K	A0A498L810	Cytoplasmic 1	marginally distinguished	DLTDYLMK	DLTDYLM[147]K[170]	196	0	0	0	3	0	0	0	5	0	0	0	0	0	0	0	0	0	0	0
K	A0A498L810	Cytoplasmic 1	marginally distinguished	DLTDYLMKILTER	DLTDYLMK[170]ILTER	196	0	0	0	14	1	0	0	2	0	0	0	0	0	0	0	2	2	0	2
K	A0A498L810	Cytoplasmic 1	marginally distinguished	DLTDYLMKILTER	DLTDYLM[147]K[170]ILTER	196	0	0	0	0	0	0	1	1	0	0	0	0	0	0	0	0	0	0	0
K	A0A498L810	Cytoplasmic 1	marginally distinguished	DLTDYLMKILTER	n[43]DLTDYLMK[170]ILTER	189, 196	0	0	0	2	0	0	0	0	0	0	0	0	0	0	0	8	2	0	18
K	A0A498L810	Cytoplasmic 1	marginally distinguished	DSYVGDEAQSKR	DSYVGDEAQSK[170]R	66	6	1	0	4	2	0	2	10	0	1	0	1	0	1	0	1	2	0	2
K	A0A498L810	Cytoplasmic 1	marginally distinguished	DSYVGDEAQSKR	DSYVGDEAQSK[170]R[170]	66	0	1	0	0	0	0	3	0	0	0	0	0	0	0	0	0	0	0	0
K	A0A498L810	Cytoplasmic 1	marginally distinguished	FRCPESLFQPSFLGMESCGIHETTFNSIMK	FRC[160]PESLFQPSFLGM[147]ESC[160]GIHETTFNSIMK[170]	289	0	0	0	3	0	0	0	0	0	3	2	0	0	0	0	0	0	0	0
K	A0A498L810	Cytoplasmic 1	marginally distinguished	FRCPESLFQPSFLGMESCGIHETTFNSIMK	FRC[160]PESLFQPSFLGM[147]ESC[160]GIHETTFNSIM[147]K[170]	289	0	0	0	0	0	0	0	0	0	2	0	0	0	0	0	0	0	0	0
K	A0A498L810	Cytoplasmic 1	marginally distinguished	HQGVMVGMGQK	HQGVMVGM[147]GQK[170]	55	0	0	0	0	1	0	0	4	0	0	0	0	0	0	0	0	0	0	0
K	A0A498L810	Cytoplasmic 1	marginally distinguished	HQGVMVGMGQK	HQGVM[147]VGMGQK[170]	55	0	0	0	1	3	0	0	2	0	0	0	0	0	0	0	0	0	0	0
K	A0A498L810	Cytoplasmic 1	marginally distinguished	HQGVMVGMGQKDSYVGDEAQSK	HQGVMVGMGQK[170]DSYVGDEAQSK	55	14	1	12	0	9	0	1	23	1	2	5	0	0	7	0	10	16	2	32
K	A0A498L810	Cytoplasmic 1	marginally distinguished	HQGVMVGMGQKDSYVGDEAQSK	HQGVMVGMGQK[170]DS[167]Y[243]VGDEAQSK	55	0	0	1	0	0	0	0	0	0	0	0	0	0	0	0	0	0	0	0
K	A0A498L810	Cytoplasmic 1	marginally distinguished	HQGVMVGMGQKDSYVGDEAQSK	HQGVMVGM[147]GQK[170]DSYVGDEAQSK	55	11	0	4	3	3	0	0	11	1	0	6	0	0	1	0	1	1	0	13
K	A0A498L810	Cytoplasmic 1	marginally distinguished	HQGVMVGMGQKDSYVGDEAQSK	HQGVM[147]VGMGQK[170]DSYVGDEAQSK	55	1	0	6	1	6	0	0	4	1	0	6	0	0	0	0	4	1	0	9
K	A0A498L810	Cytoplasmic 1	marginally distinguished	HQGVMVGMGQKDSYVGDEAQSK	HQGVM[147]VGM[147]GQK[170]DSYVGDEAQSK	55	0	0	2	0	5	0	1	12	0	0	0	0	0	0	0	1	1	0	3
K	A0A498L810	Cytoplasmic 1	marginally distinguished	HQGVMVGMGQKDSYVGDEAQSK	n[15]HQGVMVGMGQK[170]DSYVGDEAQSK	55	1	0	0	1	2	0	0	5	0	0	0	0	0	0	0	0	0	0	0
K	A0A498L810	Cytoplasmic 1	marginally distinguished	HQGVMVGMGQKDSYVGDEAQSK	n[15]HQGVMVGM[147]GQK[170]DSYVGDEAQSK	55	0	0	0	0	0	0	0	3	0	0	0	0	0	0	0	0	0	0	0
K	A0A498L810	Cytoplasmic 1	marginally distinguished	HQGVMVGMGQKDSYVGDEAQSK	n[15]HQGVM[147]VGMGQK[170]DSYVGDEAQSK	55	1	0	0	0	1	0	0	5	0	0	0	0	0	0	0	0	0	0	0
K	A0A498L810	Cytoplasmic 1	marginally distinguished	HQGVMVGMGQKDSYVGDEAQSK	n[43]HQGVMVGMGQK[142]DSYVGDEAQSK[170]	45, 66	0	0	0	0	2	0	0	0	0	0	0	0	0	0	0	0	0	0	0
K	A0A498L810	Cytoplasmic 1	marginally distinguished	HQGVMVGMGQKDSYVGDEAQSK	n[43]HQGVMVGMGQK[170]DSYVGDEAQSK	45, 55	2	0	0	0	0	0	0	0	0	0	0	0	0	0	0	0	0	0	0
K	A0A498L810	Cytoplasmic 1	marginally distinguished	HQGVMVGMGQKDSYVGDEAQSK	n[43]HQGVMVGM[147]GQK[170]DSYVGDEAQSK	45, 55	0	0	0	0	2	0	0	2	0	0	0	0	0	0	0	0	0	0	0
K	A0A498L810	Cytoplasmic 1	marginally distinguished	HQGVMVGMGQKDSYVGDEAQSK	n[43]HQGVM[147]VGMGQK[170]DSYVGDEAQSK	45, 55	8	0	6	0	4	0	0	6	0	0	0	0	0	2	0	2	2	0	22
K	A0A498L810	Cytoplasmic 1	marginally distinguished	HQGVMVGMGQKDSYVGDEAQSK	n[43]HQGVM[147]VGM[147]GQK[170]DSYVGDEAQSK	45, 55	0	0	2	0	0	0	0	2	0	0	0	0	0	0	0	0	0	0	8
K	A0A498L810	Cytoplasmic 1	marginally distinguished	HQGVMVGMGQKDSYVGDEAQSKR	HQGVMVGMGQKDSYVGDEAQSK[170]R	66	0	0	3	0	0	0	0	0	0	0	0	0	0	0	0	0	0	0	0
K	A0A498L810	Cytoplasmic 1	marginally distinguished	HQGVMVGMGQKDSYVGDEAQSKR	HQGVMVGMGQKDSYVGDEAQSK[170]R[170]	66	0	0	0	1	0	0	0	0	0	0	0	0	0	0	0	0	0	0	0
K	A0A498L810	Cytoplasmic 1	marginally distinguished	HQGVMVGMGQKDSYVGDEAQSKR	HQGVMVGMGQK[142]DSYVGDEAQSK[170]R	66	0	0	0	0	0	0	0	1	0	0	0	0	0	0	0	0	0	0	0
K	A0A498L810	Cytoplasmic 1	marginally distinguished	HQGVMVGMGQKDSYVGDEAQSKR	HQGVMVGMGQK[170]DSYVGDEAQSKR	55	21	0	19	7	6	0	8	22	2	1	19	0	0	6	0	14	18	1	50
K	A0A498L810	Cytoplasmic 1	marginally distinguished	HQGVMVGMGQKDSYVGDEAQSKR	HQGVMVGMGQK[170]DSYVGDEAQSK[170]R	55, 66	0	0	4	0	0	0	0	0	0	0	0	0	0	0	0	0	0	0	28
K	A0A498L810	Cytoplasmic 1	marginally distinguished	HQGVMVGMGQKDSYVGDEAQSKR	HQGVMVGMGQK[170]DSYVGDEAQSK[170]R[170]	55, 66	0	0	0	0	0	0	0	4	0	0	0	0	0	0	0	0	0	0	0
K	A0A498L810	Cytoplasmic 1	marginally distinguished	HQGVMVGMGQKDSYVGDEAQSKR	HQGVMVGM[147]GQKDSYVGDEAQSK[170]R	66	0	0	1	0	0	0	0	0	0	0	0	0	0	0	0	0	0	0	0
K	A0A498L810	Cytoplasmic 1	marginally distinguished	HQGVMVGMGQKDSYVGDEAQSKR	HQGVMVGM[147]GQK[170]DSYVGDEAQSKR	55	20	0	12	8	9	0	8	16	0	1	1	0	0	2	0	3	2	1	24
K	A0A498L810	Cytoplasmic 1	marginally distinguished	HQGVMVGMGQKDSYVGDEAQSKR	HQGVM[147]VGMGQK[170]DSYVGDEAQSKR	55	0	0	13	5	11	0	5	21	1	2	8	0	0	4	0	11	5	0	25
K	A0A498L810	Cytoplasmic 1	marginally distinguished	HQGVMVGMGQKDSYVGDEAQSKR	HQGVM[147]VGMGQK[170]DSYVGDEAQSK[170]R	55, 66	0	0	0	0	0	0	0	0	0	0	0	0	0	0	0	0	0	0	6
K	A0A498L810	Cytoplasmic 1	marginally distinguished	HQGVMVGMGQKDSYVGDEAQSKR	HQGVM[147]VGM[147]GQKDSYVGDEAQSK[170]R	66	0	0	2	0	0	0	0	0	0	0	0	0	0	0	0	0	0	0	0
K	A0A498L810	Cytoplasmic 1	marginally distinguished	HQGVMVGMGQKDSYVGDEAQSKR	HQGVM[147]VGM[147]GQK[170]DSYVGDEAQSKR	55	2	0	10	1	1	0	4	2	0	0	0	0	0	9	0	3	4	0	7
K	A0A498L810	Cytoplasmic 1	marginally distinguished	HQGVMVGMGQKDSYVGDEAQSKR	HQGVM[147]VGM[147]GQK[170]DSYVGDEAQSK[170]R	55, 66	0	0	4	0	0	0	0	0	0	0	0	0	0	0	0	0	0	0	0
K	A0A498L810	Cytoplasmic 1	marginally distinguished	HQGVMVGMGQKDSYVGDEAQSKR	n[15]HQGVMVGMGQK[170]DSYVGDEAQSKR	55	12	0	8	17	12	0	9	15	0	11	4	0	0	0	0	2	3	2	4
K	A0A498L810	Cytoplasmic 1	marginally distinguished	HQGVMVGMGQKDSYVGDEAQSKR	n[15]HQGVMVGM[147]GQK[170]DSYVGDEAQSKR	55	2	0	1	0	0	0	0	3	0	0	0	0	0	0	0	1	0	0	0
K	A0A498L810	Cytoplasmic 1	marginally distinguished	HQGVMVGMGQKDSYVGDEAQSKR	n[15]HQGVM[147]VGMGQK[170]DSYVGDEAQSKR	55	2	0	2	1	1	0	2	4	0	5	0	0	0	0	0	0	0	1	1
K	A0A498L810	Cytoplasmic 1	marginally distinguished	HQGVMVGMGQKDSYVGDEAQSKR	n[43]HQGVMVGMGQK[142]DSYVGDEAQSK[170]R	45, 66	2	0	0	0	0	0	0	0	0	0	0	0	0	0	0	0	0	0	0
K	A0A498L810	Cytoplasmic 1	marginally distinguished	HQGVMVGMGQKDSYVGDEAQSKR	n[43]HQGVMVGM[147]GQK[170]DSYVGDEAQSKR	45, 55	2	0	4	0	0	0	0	2	0	0	0	0	0	0	0	0	0	0	6
K	A0A498L810	Cytoplasmic 1	marginally distinguished	HQGVMVGMGQKDSYVGDEAQSKR	n[43]HQGVM[147]VGMGQK[170]DSYVGDEAQSKR	45, 55	4	0	20	4	0	0	8	10	0	2	6	0	0	10	0	10	2	0	56
K	A0A498L810	Cytoplasmic 1	marginally distinguished	HQGVMVGMGQKDSYVGDEAQSKR	n[43]HQGVM[147]VGM[147]GQK[170]DSYVGDEAQSKR	45, 55	0	0	26	12	0	0	4	12	0	0	0	0	0	22	0	6	2	0	38
K	A0A498L810	Cytoplasmic 1	marginally distinguished	HQGVMVGMGQKDSYVGDEAQSKR	n[43]HQGVM[147]VGM[147]GQK[170]DS[167]YVGDEAQSKR	45, 55	0	0	0	2	0	0	0	0	0	0	0	0	0	0	0	0	0	0	0
K	A0A498L810	Cytoplasmic 1	marginally distinguished	IKIIAPPERK	IK[170]IIAPPERK	333	0	0	0	1	0	0	0	0	0	0	0	0	0	0	0	0	0	0	0
K	A0A498L810	Cytoplasmic 1	marginally distinguished	LCYVALDFEQEMGTAASSSSLEKSYELPDGQVITIGNER	LC[160]YVALDFEQEMGTAASSSSLEK[170]SYELPDGQVITIGNER	243	0	0	0	0	0	0	0	1	0	0	0	0	0	0	0	0	0	0	0
K	A0A498L810	Cytoplasmic 1	marginally distinguished	LCYVALDFEQEMGTAASSSSLEKSYELPDGQVITIGNER	n[43]LC[160]YVALDFEQEM[147]GTAASSSSLEK[170]SYELPDGQVITIGNER	221, 243	0	0	0	0	0	0	0	2	0	0	0	0	0	0	0	0	0	0	0
K	A0A498L810	Cytoplasmic 1	marginally distinguished	LDLAGRDLTDYLMKILTER	LDLAGRDLTDYLMK[170]ILTER	196	0	0	2	0	0	0	0	1	0	0	0	0	0	0	0	0	0	0	0
K	A0A498L810	Cytoplasmic 1	marginally distinguished	LDLAGRDLTDYLMKILTER	LDLAGRDLTDYLM[147]K[170]ILTER	196	0	0	0	0	0	0	0	1	0	0	0	0	0	0	0	0	0	0	0
K	A0A498L810	Cytoplasmic 1	marginally distinguished	MQKEITSLAPSTMK	MQK[170]EITSLAPSTMK	320	0	0	1	0	0	0	0	0	1	3	0	0	0	0	0	4	0	0	6
K	A0A498L810	Cytoplasmic 1	marginally distinguished	MQKEITSLAPSTMK	MQK[170]EITSLAPSTM[147]K	320	0	0	0	0	0	0	0	0	0	0	0	0	0	0	0	2	0	0	9
K	A0A498L810	Cytoplasmic 1	marginally distinguished	MQKEITSLAPSTMK	M[147]QK[170]EITSLAPSTMK	320	0	0	0	0	0	0	0	0	0	0	0	0	0	0	0	0	0	0	6
K	A0A498L810	Cytoplasmic 1	marginally distinguished	MQKEITSLAPSTMK	M[147]QK[170]EITSLAPSTM[147]K	320	0	0	1	0	0	0	0	0	0	0	0	0	0	0	0	0	0	0	2
K	A0A498L810	Cytoplasmic 1	marginally distinguished	MQKEITSLAPSTMK	n[15]MQK[170]EITSLAPSTMK	320	0	0	0	0	0	0	0	0	0	0	0	0	0	0	0	0	0	0	1
K	A0A498L810	Cytoplasmic 1	marginally distinguished	MQKEITSLAPSTMK	n[43]MQK[170]EITSLAPSTMK	318, 320	0	0	0	0	0	0	0	0	0	0	0	0	0	0	0	0	0	0	2
K	A0A498L810	Cytoplasmic 1	marginally distinguished	MQKEITSLAPSTMK	n[43]MQK[170]EITSLAPSTM[147]K	318, 320	0	0	0	0	0	0	0	0	0	0	0	0	0	0	0	2	0	0	0
K	A0A498L810	Cytoplasmic 1	marginally distinguished	MQKEITSLAPSTMK	n[43]M[147]QK[170]EITSLAPSTMK	318, 320	0	0	0	0	0	0	0	0	0	2	0	0	0	0	0	4	0	0	14
K	A0A498L810	Cytoplasmic 1	marginally distinguished	VAPEEHPVLLTEAPLNPK	VAPEEHPVLLTEAPLN[115]PK[170]	118	3	0	0	0	0	0	0	0	0	0	0	0	0	0	0	0	0	0	0
K	A0A498L810	Cytoplasmic 1	marginally distinguished	VAPEEHPVLLTEAPLNPKANR	VAPEEHPVLLTEAPLNPK[170]ANR	118	0	1	0	3	1	0	1	0	0	0	0	0	0	0	0	2	0	0	6
K	A0A498L810	Cytoplasmic 1	marginally distinguished	VAPEEHPVLLTEAPLNPKANR	VAPEEHPVLLTEAPLNPK[170]AN[115]R	118	2	3	9	4	1	0	3	0	2	1	14	0	0	5	0	10	15	0	22
K	A0A498L810	Cytoplasmic 1	marginally distinguished	VAPEEHPVLLTEAPLNPKANR	VAPEEHPVLLTEAPLNPK[170]AN[115]R[170]	118	0	0	2	4	3	0	2	4	2	9	4	3	0	0	0	5	2	0	3
K	A0A498L810	Cytoplasmic 1	marginally distinguished	VAPEEHPVLLTEAPLNPKANR	VAPEEHPVLLTEAPLN[115]PK[170]ANR	118	1	0	2	3	2	0	0	1	0	2	2	0	0	0	0	0	1	0	5
K	A0A498L810	Cytoplasmic 1	marginally distinguished	VAPEEHPVLLTEAPLNPKANREK	VAPEEHPVLLTEAPLNPK[170]AN[115]REK	118	0	0	3	0	0	0	0	0	0	0	0	0	0	2	0	0	0	0	0
K	A0A498L825	Gamma-crystallin M2-like protein	representative	IYEKENFMGQMYEMMDDCDSIMDRYR	IYEK[170]EN[115]FMGQMYEMMDDC[160]DSIMDRYR	67	0	0	1	0	0	0	0	0	0	0	0	0	0	0	0	0	0	0	0
K	A0A498L825	Gamma-crystallin M2-like protein	representative	IYEKENFMGQMYEMMDDCDSIMDRYR	n[43]IYEK[170]ENFMGQMYEMMDDC[160]DSIMDRYR	64, 67	0	0	2	0	0	0	0	0	0	0	0	0	0	0	0	0	0	0	0
K	A0A498L825	Gamma-crystallin M2-like protein	representative	IYEKENFMGQMYEMMDDCDSIMDRYR	n[43]IYEK[170]EN[115]FMGQMYEMMDDC[160]DSIMDRYR	64, 67	0	0	4	0	0	0	0	0	0	0	0	0	0	0	0	0	0	0	0
K	A0A498L892	LSM14-like protein	canonical	AASTNTQKPVDLTEQTR	AASTNTQK[170]PVDLTEQTR	232	0	0	0	0	0	0	0	0	0	0	0	0	0	3	0	0	0	0	0
K	A0A498L892	LSM14-like protein	canonical	DFDFESANAQFNKDEIDKEFQSK	DFDFESAN[115]AQFNK[142]DEIDK[142]EFQSK[170]	297	0	0	0	0	0	0	0	0	0	0	0	0	0	1	0	0	0	0	0
K	A0A498L892	LSM14-like protein	canonical	YEGILYTIDTENSTVALAK	YEGILYTIDTEN[115]STVALAK[170]	40	0	0	0	0	0	0	0	0	0	0	0	0	0	3	0	0	0	1	0
K	A0A498L892	LSM14-like protein	canonical	YEGILYTIDTENSTVALAKVR	YEGILYTIDTEN[115]STVALAK[170]VR	40	0	0	0	0	0	0	0	0	0	0	0	0	0	1	0	0	0	0	0
K	A0A498L8B5	60S ribosomal l10	canonical	TKAQNKEHVIEALR	n[43]TK[170]AQN[115]KEHVIEALR	161, 162	0	0	0	0	0	0	0	0	0	0	0	0	0	0	0	2	0	0	0
K	A0A498L8E5	Histone H2A	subsumed	HLQLAVRNDEELNKLLGGVTIAQGGVLPNIQAVLLPK	HLQLAVRNDEELNK[170]LLGGVTIAQGGVLPNIQAVLLPK	96	0	0	2	0	0	0	0	0	0	0	0	0	0	0	0	0	0	0	0
K	A0A498L8E5	Histone H2A	subsumed	HLQLAVRNDEELNKLLGGVTIAQGGVLPNIQAVLLPK	HLQLAVRNDEELN[115]K[170]LLGGVTIAQGGVLPNIQAVLLPK	96	0	0	0	0	0	0	0	0	0	0	0	0	0	0	0	0	0	0	1
K	A0A498L8E5	Histone H2A	subsumed	HLQLAVRNDEELNKLLGGVTIAQGGVLPNIQAVLLPK	HLQLAVRN[115]DEELNK[170]LLGGVTIAQGGVLPNIQAVLLPK	96	0	0	0	0	0	0	0	0	0	0	0	0	0	0	0	2	0	0	0
K	A0A498L8E5	Histone H2A	subsumed	HLQLAVRNDEELNKLLGGVTIAQGGVLPNIQAVLLPK	HLQLAVRN[115]DEELN[115]K[170]LLGGVTIAQGGVLPNIQAVLLPK	96	0	0	0	0	0	0	0	0	0	0	0	0	0	0	0	0	0	0	2
K	A0A498L8E5	Histone H2A	subsumed	NDEELNKLLGGVTIAQGGVLPNIQAVLLPK	NDEELNK[170]LLGGVTIAQGGVLPNIQAVLLPK	96	0	0	0	0	0	0	0	0	0	0	0	0	0	1	0	0	1	0	0
K	A0A498L8E5	Histone H2A	subsumed	NDEELNKLLGGVTIAQGGVLPNIQAVLLPK	NDEELN[115]K[170]LLGGVTIAQGGVLPNIQAVLLPK	96	0	0	1	0	0	0	0	0	0	0	0	0	0	1	0	0	0	0	2
K	A0A498L8E5	Histone H2A	subsumed	NDEELNKLLGGVTIAQGGVLPNIQAVLLPK	N[115]DEELN[115]K[170]LLGGVTIAQGGVLPNIQAVLLPK	96	0	0	0	0	0	0	0	0	0	0	0	0	0	0	0	0	0	0	1
K	A0A498L8E5	Histone H2A	subsumed	NDEELNKLLGGVTIAQGGVLPNIQAVLLPKK	NDEELNKLLGGVTIAQGGVLPN[115]IQAVLLPK[170]K	119	0	0	0	0	0	0	0	0	0	0	0	0	0	0	0	0	0	0	1
K	A0A498L8E5	Histone H2A	subsumed	VTIAQGGVLPNIQAVLLPKK	VTIAQGGVLPNIQAVLLPK[170]K	119	0	0	0	1	0	0	0	0	0	0	0	0	0	0	0	0	0	0	0
K	A0A498L8H1	Serine--pyruvate aminotransferase (EC 2.6.1.44) (EC 2.6.1.51) (Alanine--glyoxylate aminotransferase)	canonical	ESLAILAETGLENSWKR	ESLAILAETGLEN[115]SWK[170]R[170]	255	0	0	0	0	0	0	0	0	0	0	0	0	0	0	0	1	0	0	0
K	A0A498L8H6	Histone H1-like protein	representative	AETAPAAAAPPAKAPK	n[43]AETAPAAAAPPAK[170]APK	77, 89	0	0	0	0	0	0	0	0	2	0	0	0	0	0	0	0	0	0	0
K	A0A498L8H6	Histone H1-like protein	representative	ALSAGGYDVEKNNSR	ALSAGGYDVEK[170]N[115]NSR	141	0	0	0	0	0	0	0	0	0	0	0	0	0	0	0	0	1	0	0
K	A0A498L8H6	Histone H1-like protein	representative	ALSAGGYDVEKNNSR	ALSAGGYDVEK[170]N[115]NSR[170]	141	0	0	0	0	0	0	0	0	0	1	2	1	0	0	0	0	5	0	1
K	A0A498L8H6	Histone H1-like protein	representative	DLIVKTVTASKER	n[43]DLIVK[170]TVTASKER	108, 112	0	0	0	0	0	0	0	0	0	0	0	0	0	0	0	0	0	0	2
K	A0A498L8H6	Histone H1-like protein	representative	IAVKSLVTNGTLVQTK	IAVK[170]SLVTNGTLVQTK	151	0	0	0	0	0	0	0	0	0	0	0	0	0	0	0	0	1	0	0
K	A0A498L8H6	Histone H1-like protein	representative	IAVKSLVTNGTLVQTK	IAVK[170]SLVTN[115]GTLVQTK	151	0	0	0	0	0	0	0	0	1	0	0	0	0	0	0	0	11	0	4
K	A0A498L8H6	Histone H1-like protein	representative	KALSAGGYDVEKNNSR	KALSAGGYDVEK[170]NNSR	141	0	0	0	0	0	0	0	0	0	0	0	0	0	0	0	0	1	0	0
K	A0A498L8H6	Histone H1-like protein	representative	KALSAGGYDVEKNNSR	KALSAGGYDVEK[170]N[115]NSR	141	0	0	0	0	0	0	0	0	0	0	0	0	0	0	0	0	0	0	1
K	A0A498L8H6	Histone H1-like protein	representative	KALSAGGYDVEKNNSR	n[15]K[170]ALSAGGYDVEKNNSR	130	0	0	0	0	0	0	0	0	0	0	0	0	0	0	0	0	1	0	0
K	A0A498L8H6	Histone H1-like protein	representative	KPAAAKKPAKSPK	n[15]K[142]PAAAK[142]K[170]PAKS[167]PK	235	0	0	0	0	0	0	0	0	0	0	0	0	0	0	0	1	0	0	0
K	A0A498L8H6	Histone H1-like protein	representative	SGVSLAALKK	SGVSLAALK[170]K	129	0	0	0	0	0	0	0	0	0	0	0	0	0	0	0	0	1	0	0
K	A0A498L8H6	Histone H1-like protein	representative	SLVTNGTLVQTKGTGASGSFK	SLVTNGTLVQTK[170]GTGASGSFK	163	0	0	0	0	0	0	0	0	0	0	0	0	0	0	0	0	1	0	0
K	A0A498L8H6	Histone H1-like protein	representative	SLVTNGTLVQTKGTGASGSFK	SLVTN[115]GTLVQTK[170]GTGASGSFK	163	0	0	0	0	0	0	0	0	0	0	0	0	0	0	0	0	2	0	0
K	A0A498L8K0	ADP ATP translocase 1	canonical	AFFKGAWSNVLR	AFFK[170]GAWSNVLR	272	0	0	0	0	0	0	0	0	0	0	0	0	0	0	0	1	0	0	0
K	A0A498L8K0	ADP ATP translocase 1	canonical	SDAVISFLKDFLAGGVAAAISKTAVAPIER	n[15]SDAVISFLK[142]DFLAGGVAAAISK[170]TAVAPIER	23	0	0	0	0	0	0	0	0	0	0	0	0	0	0	0	1	0	0	0
K	A0A498L8Q3	Histone H4	indistinguishable representative	DAVTYTEHAKR	DAVTYTEHAK[170]R	78	0	0	0	0	0	0	0	0	0	1	0	0	0	0	0	0	0	0	0
K	A0A498L8Q3	Histone H4	indistinguishable representative	DNIQGITKPAIR	DNIQGITK[170]PAIR	32	0	0	0	3	0	0	2	1	0	2	1	1	0	0	0	0	0	0	3
K	A0A498L8Q3	Histone H4	indistinguishable representative	DNIQGITKPAIR	DNIQGITK[170]PAIR[170]	32	0	2	0	0	0	0	0	0	0	0	0	0	0	0	0	0	0	0	0
K	A0A498L8Q3	Histone H4	indistinguishable representative	DNIQGITKPAIRR	DNIQGITK[170]PAIRR	32	0	0	0	0	0	0	0	0	0	1	0	0	0	0	0	0	0	0	0
K	A0A498L8Q3	Histone H4	indistinguishable representative	HAVSEGTKAVTK	HAVSEGTK[170]AVTK	219	0	0	0	0	0	0	0	0	0	0	0	0	0	0	0	0	3	0	1
K	A0A498L8Q3	Histone H4	indistinguishable representative	HAVSEGTKAVTKYTSSK	HAVSEGTKAVTK[170]YTSSK	223	0	0	1	0	0	0	0	0	0	0	0	0	0	0	0	0	0	0	1
K	A0A498L8Q3	Histone H4	indistinguishable representative	HAVSEGTKAVTKYTSSK	HAVSEGTK[170]AVTKYTSSK	219	0	0	0	0	0	0	0	0	0	0	0	0	0	0	0	0	0	0	3
K	A0A498L8Q3	Histone H4	indistinguishable representative	HAVSEGTKAVTKYTSSK	n[43]HAVSEGTKAVTK[170]YTSSK	212, 223	0	0	0	0	0	0	0	0	0	0	0	0	0	0	0	0	0	0	2
K	A0A498L8Q3	Histone H4	indistinguishable representative	KESYAIYVYK	n[15]K[170]ESYAIYVYK	137	0	1	0	0	0	0	0	0	0	0	0	0	0	0	1	0	0	0	0
K	A0A498L8Q3	Histone H4	indistinguishable representative	KTVTAMDVVYALKR	KTVTAMDVVYALK[170]R	92	0	0	0	0	0	0	0	0	0	1	0	0	0	0	0	0	2	0	0
K	A0A498L8Q3	Histone H4	indistinguishable representative	KTVTAMDVVYALKR	n[15]K[170]TVTAMDVVYALKR	80	0	0	0	4	1	0	2	0	0	8	0	0	0	0	0	0	4	0	1
K	A0A498L8Q3	Histone H4	indistinguishable representative	KTVTAMDVVYALKR	n[15]K[170]TVTAM[147]DVVYALKR	80	0	0	0	0	0	0	1	0	0	0	0	0	0	0	0	0	0	0	0
K	A0A498L8Q3	Histone H4	indistinguishable representative	KVLRDNIQGITKPAIR	n[15]K[170]VLRDNIQGITKPAIR	21	0	0	0	0	0	0	0	0	0	1	0	0	0	0	0	0	0	0	0
K	A0A498L8Q3	Histone H4	indistinguishable representative	KVLRDNIQGITKPAIR	n[15]K[170]VLR[170]DN[115]IQGITKPAIR	21	0	0	0	0	0	0	0	0	0	1	0	0	0	0	0	0	0	0	0
K	A0A498L8Q3	Histone H4	indistinguishable representative	KVLRDNIQGITKPAIR	n[43]KVLRDNIQGITK[170]PAIR	21, 32	0	0	0	0	0	0	0	0	0	0	0	0	0	0	0	2	0	0	0
K	A0A498L8Q3	Histone H4	indistinguishable representative	KVLRDNIQGITKPAIR	n[43]K[170]VLRDNIQGITKPAIR	21	0	0	0	0	0	0	0	0	0	2	0	0	0	0	0	0	0	0	0
K	A0A498L8Q3	Histone H4	indistinguishable representative	LLLPGELAKHAVSEGTK	LLLPGELAK[170]HAVSEGTK	211	0	0	0	0	0	0	0	0	0	0	1	1	0	0	0	2	2	0	2
K	A0A498L8Q3	Histone H4	indistinguishable representative	LLLPGELAKHAVSEGTKAVTK	LLLPGELAK[170]HAVSEGTKAVTK	211	0	0	0	0	0	0	0	0	0	0	0	0	0	0	0	0	0	0	1
K	A0A498L8Q3	Histone H4	indistinguishable representative	QVHPDTGISSKAMGIMNSFVNDIFER	QVHPDTGISSK[170]AMGIMNSFVNDIFER	160	0	0	0	0	0	0	0	0	0	0	0	0	0	0	0	0	0	0	1
K	A0A498L8Q3	Histone H4	indistinguishable representative	QVHPDTGISSKAMGIMNSFVNDIFER	QVHPDTGISSK[170]AMGIMN[115]SFVNDIFER	160	0	0	0	0	0	0	0	0	0	0	0	0	0	0	0	0	1	0	0
K	A0A498L8Q3	Histone H4	indistinguishable representative	QVHPDTGISSKAMGIMNSFVNDIFER	QVHPDTGISSK[170]AM[147]GIMNSFVNDIFER	160	0	0	0	0	0	0	0	0	0	0	0	0	0	0	0	1	0	0	0
K	A0A498L8Q3	Histone H4	indistinguishable representative	QVHPDTGISSKAMGIMNSFVNDIFER	Q[111]VHPDTGISSK[170]AMGIMNSFVNDIFER	160	0	0	0	0	0	0	0	0	0	0	0	0	0	0	0	0	0	0	1
K	A0A498L8Q3	Histone H4	indistinguishable representative	QVHPDTGISSKAMGIMNSFVNDIFER	Q[111]VHPDTGISSK[170]AM[147]GIMN[115]SFVNDIFER	160	0	0	0	0	0	0	0	0	0	0	0	0	0	0	0	0	0	0	1
K	A0A498L8Q3	Histone H4	indistinguishable representative	TVTAMDVVYALKR	TVTAMDVVYALK[170]R	92	0	0	0	0	0	0	0	0	0	1	0	1	0	0	0	0	0	0	3
K	A0A498L8Q3	Histone H4	indistinguishable representative	VLKQVHPDTGISSK	VLK[170]QVHPDTGISSK	149	0	0	0	2	0	0	0	0	1	0	0	3	0	2	0	0	6	0	4
K	A0A498L8Q3	Histone H4	indistinguishable representative	VLKQVHPDTGISSK	n[43]VLK[170]QVHPDTGISSK	147, 149	0	0	2	0	0	0	0	0	0	4	2	0	0	0	0	2	8	0	8
K	A0A498L8T4	15-hydroxyprostaglandin dehydrogenase [NAD(+)]-like protein	canonical	MDLKDKVAVVTGAAQGLGR	n[43]MDLKDK[170]VAVVTGAAQGLGR	1, 6	0	0	0	0	0	0	0	0	0	0	0	0	0	0	0	2	0	0	0
K	A0A498L8T4	15-hydroxyprostaglandin dehydrogenase [NAD(+)]-like protein	canonical	MDLKDKVAVVTGAAQGLGR	n[43]MDLK[170]DKVAVVTGAAQGLGR	1, 4	0	0	0	0	0	0	0	0	0	0	0	0	0	0	0	2	0	0	0
K	A0A498L8U0	Elongation factor 1-alpha	canonical	EHALLAYTLGVKQLIVGVNK	EHALLAYTLGVK[170]QLIVGVNK	146	0	0	0	0	0	0	0	0	0	0	0	0	0	1	0	0	0	0	0
K	A0A498L8U0	Elongation factor 1-alpha	canonical	FEKEAAEMGK	n[43]FEK[170]EAAEMGK	42, 44	0	0	0	0	0	0	0	0	0	0	0	0	0	0	0	2	0	0	0
K	A0A498L8U0	Elongation factor 1-alpha	canonical	LPLQDVYKIGGIGTVPVGR	LPLQDVYK[170]IGGIGTVPVGR	255	3	0	1	0	0	0	0	0	0	0	0	0	0	1	1	10	0	0	12
K	A0A498L8U0	Elongation factor 1-alpha	canonical	LPLQDVYKIGGIGTVPVGR	n[43]LPLQDVYK[170]IGGIGTVPVGR	248, 255	0	0	2	0	0	0	0	0	0	0	0	0	0	0	0	0	0	0	0
K	A0A498L8U0	Elongation factor 1-alpha	canonical	SGDAAIVDMIPGKPMCVESFSEYPPLGR	SGDAAIVDMIPGK[170]PMC[160]VESFSEYPPLGR	408	0	0	0	0	0	0	0	0	0	0	0	0	0	0	0	1	0	0	0
K	A0A498L8U0	Elongation factor 1-alpha	canonical	SGDAAIVDMIPGKPMCVESFSEYPPLGR	SGDAAIVDMIPGK[170]PM[147]C[160]VESFSEYPPLGR	408	0	0	1	0	0	0	0	0	0	0	0	0	0	0	0	0	0	0	0
K	A0A498L8U0	Elongation factor 1-alpha	canonical	SGDAAIVDMIPGKPMCVESFSEYPPLGR	SGDAAIVDM[147]IPGK[170]PMC[160]VESFSEYPPLGR	408	0	0	0	0	0	0	0	0	0	0	1	0	0	0	0	0	0	0	0
K	A0A498L8U0	Elongation factor 1-alpha	canonical	TIEKFEKEAAEMGK	TIEKFEK[170]EAAEMGK	44	0	0	0	0	0	0	0	0	0	0	0	0	0	0	0	0	0	0	1
K	A0A498L8U0	Elongation factor 1-alpha	canonical	TIEKFEKEAAEMGK	TIEK[170]FEKEAAEMGK	41	0	0	0	0	0	0	0	0	0	0	0	0	0	1	0	2	0	0	3
K	A0A498L8U0	Elongation factor 1-alpha	canonical	TIEKFEKEAAEMGK	TIEK[170]FEKEAAEM[147]GK	41	0	0	1	0	0	0	0	0	0	0	0	0	0	0	0	1	0	0	0
K	A0A498L8U0	Elongation factor 1-alpha	canonical	TIEKFEKEAAEMGK	n[43]TIEK[170]FEKEAAEMGK	38, 41	0	0	0	0	0	0	0	0	0	0	0	0	0	8	0	8	0	0	8
K	A0A498L8V2	Aconitate hydratase, mitochondrial (Aconitase) (EC 4.2.1.-)	canonical	LNRPLTLSEKIVYGHLDDPSGQEIVR	LNRPLTLSEK[170]IVYGHLDDPSGQEIVR	70	0	0	1	0	0	0	0	0	0	0	2	0	0	0	0	0	0	0	0
K	A0A498L8V2	Aconitate hydratase, mitochondrial (Aconitase) (EC 4.2.1.-)	canonical	SFAPGKPLQAVIK	n[43]SFAPGK[170]PLQAVIK	733, 738	0	0	2	0	0	0	0	0	0	0	0	0	0	0	0	0	0	0	0
K	A0A498L8V3	Myosin heavy fast skeletal muscle-like protein	canonical	MQGSLEDQIIAANPLLEAYGNAKTVR	M[147]QGSLEDQIIAANPLLEAYGN[115]AK[170]TVR	236	0	0	1	0	0	0	0	0	0	0	0	0	0	0	0	0	0	0	0
K	A0A498L8V5	Peroxiredoxin-4	canonical	GLFIIDDKGVLR	GLFIIDDK[170]GVLR	197	0	0	0	0	0	0	0	0	0	0	0	0	0	0	0	0	0	0	1
K	A0A498L8V5	Peroxiredoxin-4	canonical	LVQAFQYTDKHGEVCPAGWKPGSDTIIPDPAGK	n[43]LVQAFQYTDK[170]HGEVC[160]PAGWKPGSDTIIPDPAGK	220, 229	0	0	0	0	0	0	0	0	2	0	0	0	0	0	0	0	0	0	0
K	A0A498L8Y5	Histone H2B	subsumed	HAVSEGTKAVTK	HAVSEGTK[170]AVTK	115	0	0	0	0	0	0	0	0	0	0	0	0	0	0	0	0	3	0	1
K	A0A498L8Y5	Histone H2B	subsumed	HAVSEGTKAVTKYTSSK	HAVSEGTKAVTK[170]YTSSK	119	0	0	1	0	0	0	0	0	0	0	0	0	0	0	0	0	0	0	1
K	A0A498L8Y5	Histone H2B	subsumed	HAVSEGTKAVTKYTSSK	HAVSEGTK[170]AVTKYTSSK	115	0	0	0	0	0	0	0	0	0	0	0	0	0	0	0	0	0	0	3
K	A0A498L8Y5	Histone H2B	subsumed	HAVSEGTKAVTKYTSSK	n[43]HAVSEGTKAVTK[170]YTSSK	108, 119	0	0	0	0	0	0	0	0	0	0	0	0	0	0	0	0	0	0	2
K	A0A498L8Y5	Histone H2B	subsumed	KESYAIYVYK	n[15]K[170]ESYAIYVYK	33	0	1	0	0	0	0	0	0	0	0	0	0	0	0	1	0	0	0	0
K	A0A498L8Y5	Histone H2B	subsumed	LLLPGELAKHAVSEGTK	LLLPGELAK[170]HAVSEGTK	107	0	0	0	0	0	0	0	0	0	0	1	1	0	0	0	2	2	0	2
K	A0A498L8Y5	Histone H2B	subsumed	LLLPGELAKHAVSEGTKAVTK	LLLPGELAK[170]HAVSEGTKAVTK	107	0	0	0	0	0	0	0	0	0	0	0	0	0	0	0	0	0	0	1
K	A0A498L8Y5	Histone H2B	subsumed	QVHPDTGISSKAMGIMNSFVNDIFER	QVHPDTGISSK[170]AMGIMNSFVNDIFER	56	0	0	0	0	0	0	0	0	0	0	0	0	0	0	0	0	0	0	1
K	A0A498L8Y5	Histone H2B	subsumed	QVHPDTGISSKAMGIMNSFVNDIFER	QVHPDTGISSK[170]AMGIMN[115]SFVNDIFER	56	0	0	0	0	0	0	0	0	0	0	0	0	0	0	0	0	1	0	0
K	A0A498L8Y5	Histone H2B	subsumed	QVHPDTGISSKAMGIMNSFVNDIFER	QVHPDTGISSK[170]AM[147]GIMNSFVNDIFER	56	0	0	0	0	0	0	0	0	0	0	0	0	0	0	0	1	0	0	0
K	A0A498L8Y5	Histone H2B	subsumed	QVHPDTGISSKAMGIMNSFVNDIFER	Q[111]VHPDTGISSK[170]AMGIMNSFVNDIFER	56	0	0	0	0	0	0	0	0	0	0	0	0	0	0	0	0	0	0	1
K	A0A498L8Y5	Histone H2B	subsumed	QVHPDTGISSKAMGIMNSFVNDIFER	Q[111]VHPDTGISSK[170]AM[147]GIMN[115]SFVNDIFER	56	0	0	0	0	0	0	0	0	0	0	0	0	0	0	0	0	0	0	1
K	A0A498L8Y5	Histone H2B	subsumed	VLKQVHPDTGISSK	VLK[170]QVHPDTGISSK	45	0	0	0	2	0	0	0	0	1	0	0	3	0	2	0	0	6	0	4
K	A0A498L8Y5	Histone H2B	subsumed	VLKQVHPDTGISSK	n[43]VLK[170]QVHPDTGISSK	43, 45	0	0	2	0	0	0	0	0	0	4	2	0	0	0	0	2	8	0	8
K	A0A498L931	Isocitrate dehydrogenase [NAD] subunit, mitochondrial	indistinguishable representative	GPLKTPIAAGHPSMNLLLR	GPLK[170]TPIAAGHPSMNLLLR	286	0	0	0	0	0	0	0	0	0	0	1	0	0	0	0	0	0	0	0
K	A0A498L946	Myofibril-bound serine ase	representative	DSCQGDSGGPVVCNGK	DSC[160]QGDSGGPVVC[160]NGK[170]	189	0	0	0	0	0	0	0	0	2	0	0	0	0	0	0	0	0	0	0
K	A0A498L946	Myofibril-bound serine ase	representative	DSCQGDSGGPVVCNGK	DSC[160]QGDSGGPVVC[160]N[115]GK[170]	189	0	0	0	0	0	0	0	0	3	0	0	0	0	0	0	0	0	0	0
K	A0A498L959	Putative serine threonine kinase-like protein	subsumed	IVSPGKGILAADESIGSMGK	IVSPGK[170]GILAADESIGSMGK	28	0	0	0	0	0	0	0	0	0	0	3	0	0	0	0	0	0	0	0
K	A0A498L959	Putative serine threonine kinase-like protein	subsumed	IVSPGKGILAADESIGSMGKR	n[43]IVSPGK[170]GILAADESIGSMGKR	23, 28	0	0	0	0	0	0	0	0	0	0	2	0	0	0	0	0	0	0	0
K	A0A498L989	Histone H2A	marginally distinguished	HLQLAVRNDEELNKLLGGVTIAQGGVLPNIQAVLLPK	HLQLAVRNDEELNK[170]LLGGVTIAQGGVLPNIQAVLLPK	96	0	0	2	0	0	0	0	0	0	0	0	0	0	0	0	0	0	0	0
K	A0A498L989	Histone H2A	marginally distinguished	HLQLAVRNDEELNKLLGGVTIAQGGVLPNIQAVLLPK	HLQLAVRNDEELN[115]K[170]LLGGVTIAQGGVLPNIQAVLLPK	96	0	0	0	0	0	0	0	0	0	0	0	0	0	0	0	0	0	0	1
K	A0A498L989	Histone H2A	marginally distinguished	HLQLAVRNDEELNKLLGGVTIAQGGVLPNIQAVLLPK	HLQLAVRN[115]DEELNK[170]LLGGVTIAQGGVLPNIQAVLLPK	96	0	0	0	0	0	0	0	0	0	0	0	0	0	0	0	2	0	0	0
K	A0A498L989	Histone H2A	marginally distinguished	HLQLAVRNDEELNKLLGGVTIAQGGVLPNIQAVLLPK	HLQLAVRN[115]DEELN[115]K[170]LLGGVTIAQGGVLPNIQAVLLPK	96	0	0	0	0	0	0	0	0	0	0	0	0	0	0	0	0	0	0	2
K	A0A498L989	Histone H2A	marginally distinguished	NDEELNKLLGGVTIAQGGVLPNIQAVLLPK	NDEELNK[170]LLGGVTIAQGGVLPNIQAVLLPK	96	0	0	0	0	0	0	0	0	0	0	0	0	0	1	0	0	1	0	0
K	A0A498L989	Histone H2A	marginally distinguished	NDEELNKLLGGVTIAQGGVLPNIQAVLLPK	NDEELN[115]K[170]LLGGVTIAQGGVLPNIQAVLLPK	96	0	0	1	0	0	0	0	0	0	0	0	0	0	1	0	0	0	0	2
K	A0A498L989	Histone H2A	marginally distinguished	NDEELNKLLGGVTIAQGGVLPNIQAVLLPK	N[115]DEELN[115]K[170]LLGGVTIAQGGVLPNIQAVLLPK	96	0	0	0	0	0	0	0	0	0	0	0	0	0	0	0	0	0	0	1
K	A0A498L989	Histone H2A	marginally distinguished	NDEELNKLLGGVTIAQGGVLPNIQAVLLPKK	NDEELNKLLGGVTIAQGGVLPN[115]IQAVLLPK[170]K	119	0	0	0	0	0	0	0	0	0	0	0	0	0	0	0	0	0	0	1
K	A0A498L989	Histone H2A	marginally distinguished	VTIAQGGVLPNIQAVLLPKK	VTIAQGGVLPNIQAVLLPK[170]K	119	0	0	0	1	0	0	0	0	0	0	0	0	0	0	0	0	0	0	0
K	A0A498L998	Histone H1-like protein	indistinguishable representative	ALAAGGYDVEKNNSR	ALAAGGYDVEK[170]NN[115]SR[170]	66	0	0	0	0	0	0	0	0	1	0	0	0	0	0	0	0	0	0	0
K	A0A498L998	Histone H1-like protein	indistinguishable representative	ALAAGGYDVEKNNSR	ALAAGGYDVEK[170]N[115]NSR	66	0	0	0	0	0	0	0	0	0	0	0	0	0	0	0	0	1	0	5
K	A0A498L998	Histone H1-like protein	indistinguishable representative	ALAAGGYDVEKNNSR	ALAAGGYDVEK[170]N[115]NSR[170]	66	0	0	0	0	0	0	0	0	3	3	2	7	0	0	0	0	9	0	0
K	A0A498L998	Histone H1-like protein	indistinguishable representative	GTLVQVKGTGASGSFK	n[43]GTLVQVK[170]GTGASGSFK	82, 88	0	0	0	0	0	0	0	0	0	0	0	0	0	0	0	0	2	0	2
K	A0A498L998	Histone H1-like protein	indistinguishable representative	KALAAGGYDVEKNNSR	KALAAGGYDVEK[170]NNSR	66	0	0	0	0	0	0	0	0	0	0	0	0	0	0	0	0	2	0	0
K	A0A498L998	Histone H1-like protein	indistinguishable representative	KALAAGGYDVEKNNSR	KALAAGGYDVEK[170]N[115]NSR	66	0	0	0	0	0	0	0	0	0	0	0	0	0	0	0	0	3	0	0
K	A0A498L998	Histone H1-like protein	indistinguishable representative	KALAAGGYDVEKNNSR	KALAAGGYDVEK[170]N[115]NSR[170]	66	0	0	0	0	0	0	0	0	0	0	0	0	0	0	0	0	1	0	0
K	A0A498L998	Histone H1-like protein	indistinguishable representative	KALAAGGYDVEKNNSR	n[15]K[170]ALAAGGYDVEKNNSR	55	0	0	0	0	0	0	0	0	0	0	0	0	0	0	0	0	1	0	0
K	A0A498L998	Histone H1-like protein	indistinguishable representative	SGVSLAALKK	SGVSLAALK[170]K	54	0	0	0	0	0	0	0	0	0	0	0	0	0	0	0	0	1	0	0
K	A0A498L9A0	Gamma-crystallin M2-like protein	subsumed	MMGKVIFYEDRNFQGR	n[43]MMGK[170]VIFYEDRNFQGR	1, 4	0	0	4	0	0	0	0	0	0	0	0	0	0	0	0	0	0	0	0
K	A0A498L9A3	Ribosomal_S17_N domain-containing protein	canonical	AYQKQPTIFQNK	AYQK[170]QPTIFQNK	12	0	0	0	0	0	0	0	0	0	0	0	0	0	0	0	1	0	0	1
K	A0A498L9F1	Tubulin beta chain	representative	EAESCDCLQGFQLTHSLGGGTGSGMGTLLISK	EAESC[160]DC[160]LQGFQLTHSLGGGTGSGM[147]GTLLISK[170]	154	0	0	0	0	0	0	1	0	0	0	0	0	0	0	0	0	0	0	0
K	A0A498L9F1	Tubulin beta chain	representative	EAESCDCLQGFQLTHSLGGGTGSGMGTLLISKIR	EAESC[160]DC[160]LQGFQLTHSLGGGTGSGMGTLLISK[170]IR	154	0	0	0	0	0	0	2	0	0	0	1	0	0	0	0	0	0	0	0
K	A0A498L9F1	Tubulin beta chain	representative	EAESCDCLQGFQLTHSLGGGTGSGMGTLLISKIREEYPDR	EAESC[160]DC[160]LQGFQLTHSLGGGTGSGM[147]GTLLISK[170]IREEYPDR	154	0	0	0	0	0	0	1	0	0	0	0	0	0	0	0	0	0	0	0
K	A0A498L9F1	Tubulin beta chain	representative	EIVHLQAGQCGNQIGAKFWEVISDEHGIDPTGTYHGDSDLQLDR	EIVHLQAGQC[160]GNQIGAK[170]FWEVISDEHGIDPTGTYHGDSDLQLDR	19	0	0	0	0	0	0	0	0	0	0	1	0	0	0	0	0	0	0	0
K	A0A498L9F1	Tubulin beta chain	representative	GLKMAATFIGNSTAIQELFKR	GLK[170]MAATFIGNSTAIQELFKR	362	0	0	0	0	0	0	0	0	0	0	3	0	0	0	0	0	0	0	0
K	A0A498L9F1	Tubulin beta chain	representative	GLKMAATFIGNSTAIQELFKR	GLK[170]MAATFIGN[115]STAIQELFKR	362	0	0	0	0	0	0	0	0	0	0	0	0	0	0	0	0	0	0	1
K	A0A498L9F1	Tubulin beta chain	representative	GLKMAATFIGNSTAIQELFKR	n[15]GLK[170]MAATFIGNSTAIQELFKR	362	0	0	0	0	0	0	2	0	0	0	0	0	0	0	0	0	0	0	0
K	A0A498L9F1	Tubulin beta chain	representative	GLKMAATFIGNSTAIQELFKR	n[43]GLK[170]MAATFIGNSTAIQELFKR	360, 362	0	0	0	0	0	0	0	0	0	0	2	0	0	0	0	0	0	0	0
K	A0A498L9F1	Tubulin beta chain	representative	GLKMAATFIGNSTAIQELFKR	n[43]GLK[170]MAATFIGN[115]STAIQELFKR	360, 362	0	0	0	0	0	0	0	0	0	0	2	0	0	0	0	0	0	0	0
K	A0A498L9F1	Tubulin beta chain	representative	GLKMAATFIGNSTAIQELFKR	n[43]GLK[170]M[147]AATFIGNSTAIQELFKR	360, 362	0	0	2	0	0	0	0	0	0	0	0	0	0	0	0	0	0	0	0
K	A0A498L9F1	Tubulin beta chain	representative	KEAESCDCLQGFQLTHSLGGGTGSGMGTLLISK	n[43]K[170]EAESC[160]DC[160]LQGFQLTHSLGGGTGSGMGTLLISK	122	0	0	0	0	0	0	6	0	0	0	4	0	0	0	0	0	0	0	0
K	A0A498L9F1	Tubulin beta chain	representative	MAATFIGNSTAIQELFKR	MAATFIGNSTAIQELFK[170]R	379	0	0	0	0	0	0	0	0	0	0	2	0	0	0	0	0	0	0	0
K	A0A498L9F1	Tubulin beta chain	representative	MAATFIGNSTAIQELFKR	MAATFIGN[115]STAIQELFK[170]R	379	0	0	0	0	0	0	0	0	0	0	1	0	0	0	0	0	0	0	0
K	A0A498L9F1	Tubulin beta chain	representative	MAATFIGNSTAIQELFKR	MAATFIGN[115]STAIQELFK[170]R[170]	379	0	0	1	0	0	0	5	0	0	0	8	0	0	1	0	0	0	1	0
K	A0A498L9F1	Tubulin beta chain	representative	MSMKEVDEQMLNVQNK	MSMK[170]EVDEQMLNVQNK	324	0	0	0	0	0	0	0	0	0	0	3	0	0	0	0	0	0	0	2
K	A0A498L9F1	Tubulin beta chain	representative	NSSYFVEWIPNNVKTAVCDIPPR	NSSYFVEWIPNNVK[170]TAVC[160]DIPPR	350	0	0	0	0	0	0	1	0	0	0	2	0	0	0	0	0	0	0	0
K	A0A498L9F1	Tubulin beta chain	representative	TLKLTTPTYGDLNHLVSATMSGVTTCLR	TLK[170]LTTPTYGDLNHLVSATMSGVTTC[160]LR	216	0	0	0	0	0	0	1	0	0	0	0	0	0	0	0	0	0	0	0
K	A0A498L9F1	Tubulin beta chain	representative	TLKLTTPTYGDLNHLVSATMSGVTTCLR	TLK[170]LTTPTYGDLN[115]HLVSATMSGVTTC[160]LR	216	0	0	1	0	0	0	1	0	0	0	7	0	0	0	0	0	0	0	4
K	A0A498L9F1	Tubulin beta chain	representative	TLKLTTPTYGDLNHLVSATMSGVTTCLR	n[15]TLK[170]LTTPTYGDLN[115]HLVSATMSGVTTC[160]LR	216	0	0	0	0	0	0	1	0	0	0	0	0	0	0	0	0	0	0	0
K	A0A498L9F1	Tubulin beta chain	representative	TLKLTTPTYGDLNHLVSATMSGVTTCLR	n[43]TLK[170]LTTPTYGDLN[115]HLVSATMSGVTTC[160]LR	214, 216	0	0	0	0	0	0	0	0	0	0	2	0	0	0	0	0	0	0	0
K	A0A498L9G5	Alpha-2-macroglobulin 1	indistinguishable representative	ELTYKHDDGSYSAFGR	ELTYK[170]HDDGSYSAFGR	923	0	0	0	0	0	0	0	0	0	0	0	0	0	0	0	0	0	0	1
K	A0A498L9G5	Alpha-2-macroglobulin 1	indistinguishable representative	ELTYKHDDGSYSAFGR	n[43]ELTYK[170]HDDGSYSAFGR	919, 923	0	0	0	0	0	0	0	0	0	0	0	0	0	0	0	0	0	0	2
K	A0A498L9M7	Coronin	indistinguishable representative	AVFVSDGKILTTGFSR	AVFVSDGK[170]ILTTGFSR	504	0	0	0	0	0	0	0	0	0	0	0	0	0	0	0	0	0	0	6
K	A0A498L9M7	Coronin	indistinguishable representative	AVFVSDGKILTTGFSR	n[43]AVFVSDGK[170]ILTTGFSR	497, 504	0	0	0	0	0	0	0	0	0	0	0	0	0	0	0	0	0	0	4
K	A0A498L9M7	Coronin	indistinguishable representative	QSDSVDVQALQNEMKELR	QSDSVDVQALQN[115]EMK[170]ELR	708	0	0	0	0	0	0	0	0	0	0	0	0	0	0	0	0	0	0	1
K	A0A498L9M7	Coronin	indistinguishable representative	VIKSLMATTSASSSNR	VIK[170]SLMATTSASSSNR	680	0	0	0	0	0	0	0	0	0	0	0	0	0	0	0	0	0	0	3
K	A0A498L9M7	Coronin	indistinguishable representative	VIKSLMATTSASSSNR	n[43]VIK[170]SLMATTSASSSNR	678, 680	0	0	0	0	0	0	0	0	0	0	0	0	0	0	0	0	0	0	2
K	A0A498L9R0	Histone H1-like protein	marginally distinguished	ALAAGGYDVEKNNSR	ALAAGGYDVEK[170]NN[115]SR[170]	67	0	0	0	0	0	0	0	0	1	0	0	0	0	0	0	0	0	0	0
K	A0A498L9R0	Histone H1-like protein	marginally distinguished	ALAAGGYDVEKNNSR	ALAAGGYDVEK[170]N[115]NSR	67	0	0	0	0	0	0	0	0	0	0	0	0	0	0	0	0	1	0	5
K	A0A498L9R0	Histone H1-like protein	marginally distinguished	ALAAGGYDVEKNNSR	ALAAGGYDVEK[170]N[115]NSR[170]	67	0	0	0	0	0	0	0	0	3	3	2	7	0	0	0	0	9	0	0
K	A0A498L9R0	Histone H1-like protein	marginally distinguished	GTLVQVKGTGASGSFK	n[43]GTLVQVK[170]GTGASGSFK	83, 89	0	0	0	0	0	0	0	0	0	0	0	0	0	0	0	0	2	0	2
K	A0A498L9R0	Histone H1-like protein	marginally distinguished	KALAAGGYDVEKNNSR	KALAAGGYDVEK[170]NNSR	67	0	0	0	0	0	0	0	0	0	0	0	0	0	0	0	0	2	0	0
K	A0A498L9R0	Histone H1-like protein	marginally distinguished	KALAAGGYDVEKNNSR	KALAAGGYDVEK[170]N[115]NSR	67	0	0	0	0	0	0	0	0	0	0	0	0	0	0	0	0	3	0	0
K	A0A498L9R0	Histone H1-like protein	marginally distinguished	KALAAGGYDVEKNNSR	KALAAGGYDVEK[170]N[115]NSR[170]	67	0	0	0	0	0	0	0	0	0	0	0	0	0	0	0	0	1	0	0
K	A0A498L9R0	Histone H1-like protein	marginally distinguished	KALAAGGYDVEKNNSR	n[15]K[170]ALAAGGYDVEKNNSR	56	0	0	0	0	0	0	0	0	0	0	0	0	0	0	0	0	1	0	0
K	A0A498L9R0	Histone H1-like protein	marginally distinguished	SGVSLAALKK	SGVSLAALK[170]K	55	0	0	0	0	0	0	0	0	0	0	0	0	0	0	0	0	1	0	0
K	A0A498L9R8	Inter-alpha-trypsin inhibitor heavy chain H2	canonical	AHVVFKPTLQQQR	AHVVFK[170]PTLQQQR	232	0	0	0	0	0	0	0	0	0	0	0	0	0	0	1	0	0	0	1
K	A0A498L9R8	Inter-alpha-trypsin inhibitor heavy chain H2	canonical	FAHTTVKSSVVNSGPK	FAHTTVK[170]SSVVNSGPK	71	0	0	1	0	0	0	0	0	0	0	0	0	0	0	0	0	0	0	4
K	A0A498L9R8	Inter-alpha-trypsin inhibitor heavy chain H2	canonical	IYANHDAAEQLKTFYSQVSSPLLK	IYANHDAAEQLK[170]TFYSQVSSPLLK	467	0	0	0	0	0	0	0	0	0	0	0	0	0	0	0	0	0	0	2
K	A0A498L9R8	Inter-alpha-trypsin inhibitor heavy chain H2	canonical	YVQSIKPNGGTNINEALLR	YVQSIK[170]PN[115]GGTNINEALLR	361	0	0	0	0	0	0	0	0	0	0	0	0	0	0	0	0	0	0	1
K	A0A498L9S7	Histone H2A	subsumed	HLQLAVRNDEELNKLLGGVTIAQGGVLPNIQAVLLPK	HLQLAVRNDEELNK[170]LLGGVTIAQGGVLPNIQAVLLPK	96	0	0	2	0	0	0	0	0	0	0	0	0	0	0	0	0	0	0	0
K	A0A498L9S7	Histone H2A	subsumed	HLQLAVRNDEELNKLLGGVTIAQGGVLPNIQAVLLPK	HLQLAVRNDEELN[115]K[170]LLGGVTIAQGGVLPNIQAVLLPK	96	0	0	0	0	0	0	0	0	0	0	0	0	0	0	0	0	0	0	1
K	A0A498L9S7	Histone H2A	subsumed	HLQLAVRNDEELNKLLGGVTIAQGGVLPNIQAVLLPK	HLQLAVRN[115]DEELNK[170]LLGGVTIAQGGVLPNIQAVLLPK	96	0	0	0	0	0	0	0	0	0	0	0	0	0	0	0	2	0	0	0
K	A0A498L9S7	Histone H2A	subsumed	HLQLAVRNDEELNKLLGGVTIAQGGVLPNIQAVLLPK	HLQLAVRN[115]DEELN[115]K[170]LLGGVTIAQGGVLPNIQAVLLPK	96	0	0	0	0	0	0	0	0	0	0	0	0	0	0	0	0	0	0	2
K	A0A498L9S7	Histone H2A	subsumed	NDEELNKLLGGVTIAQGGVLPNIQAVLLPK	NDEELNK[170]LLGGVTIAQGGVLPNIQAVLLPK	96	0	0	0	0	0	0	0	0	0	0	0	0	0	1	0	0	1	0	0
K	A0A498L9S7	Histone H2A	subsumed	NDEELNKLLGGVTIAQGGVLPNIQAVLLPK	NDEELN[115]K[170]LLGGVTIAQGGVLPNIQAVLLPK	96	0	0	1	0	0	0	0	0	0	0	0	0	0	1	0	0	0	0	2
K	A0A498L9S7	Histone H2A	subsumed	NDEELNKLLGGVTIAQGGVLPNIQAVLLPK	N[115]DEELN[115]K[170]LLGGVTIAQGGVLPNIQAVLLPK	96	0	0	0	0	0	0	0	0	0	0	0	0	0	0	0	0	0	0	1
K	A0A498L9S7	Histone H2A	subsumed	NDEELNKLLGGVTIAQGGVLPNIQAVLLPKK	NDEELNKLLGGVTIAQGGVLPN[115]IQAVLLPK[170]K	119	0	0	0	0	0	0	0	0	0	0	0	0	0	0	0	0	0	0	1
K	A0A498L9S7	Histone H2A	subsumed	VTIAQGGVLPNIQAVLLPKK	VTIAQGGVLPNIQAVLLPK[170]K	119	0	0	0	1	0	0	0	0	0	0	0	0	0	0	0	0	0	0	0
K	A0A498L9T1	Carboxypeptidase M	canonical	GVVTDSNGKPVQNAVVEVVGR	GVVTDSN[115]GK[170]PVQN[115]AVVEVVGR[170]	327	0	2	0	0	0	0	0	0	0	0	0	0	0	0	0	0	0	0	0
K	A0A498L9T1	Carboxypeptidase M	canonical	GVVTDSNGKPVQNAVVEVVGRR	GVVTDSNGK[170]PVQN[115]AVVEVVGR[170]R	327	0	1	0	0	0	0	0	0	0	0	0	0	0	0	0	0	0	0	0
K	A0A498L9T6	Histone H4	representative	DAVTYTEHAKR	DAVTYTEHAK[170]R	78	0	0	0	0	0	0	0	0	0	1	0	0	0	0	0	0	0	0	0
K	A0A498L9T6	Histone H4	representative	DNIQGITKPAIR	DNIQGITK[170]PAIR	32	0	0	0	3	0	0	2	1	0	2	1	1	0	0	0	0	0	0	3
K	A0A498L9T6	Histone H4	representative	DNIQGITKPAIR	DNIQGITK[170]PAIR[170]	32	0	2	0	0	0	0	0	0	0	0	0	0	0	0	0	0	0	0	0
K	A0A498L9T6	Histone H4	representative	DNIQGITKPAIRR	DNIQGITK[170]PAIRR	32	0	0	0	0	0	0	0	0	0	1	0	0	0	0	0	0	0	0	0
K	A0A498L9T6	Histone H4	representative	KTVTAMDVVYALKR	KTVTAMDVVYALK[170]R	92	0	0	0	0	0	0	0	0	0	1	0	0	0	0	0	0	2	0	0
K	A0A498L9T6	Histone H4	representative	KTVTAMDVVYALKR	n[15]K[170]TVTAMDVVYALKR	80	0	0	0	4	1	0	2	0	0	8	0	0	0	0	0	0	4	0	1
K	A0A498L9T6	Histone H4	representative	KTVTAMDVVYALKR	n[15]K[170]TVTAM[147]DVVYALKR	80	0	0	0	0	0	0	1	0	0	0	0	0	0	0	0	0	0	0	0
K	A0A498L9T6	Histone H4	representative	KVLRDNIQGITKPAIR	n[15]K[170]VLRDNIQGITKPAIR	21	0	0	0	0	0	0	0	0	0	1	0	0	0	0	0	0	0	0	0
K	A0A498L9T6	Histone H4	representative	KVLRDNIQGITKPAIR	n[15]K[170]VLR[170]DN[115]IQGITKPAIR	21	0	0	0	0	0	0	0	0	0	1	0	0	0	0	0	0	0	0	0
K	A0A498L9T6	Histone H4	representative	KVLRDNIQGITKPAIR	n[43]KVLRDNIQGITK[170]PAIR	21, 32	0	0	0	0	0	0	0	0	0	0	0	0	0	0	0	2	0	0	0
K	A0A498L9T6	Histone H4	representative	KVLRDNIQGITKPAIR	n[43]K[170]VLRDNIQGITKPAIR	21	0	0	0	0	0	0	0	0	0	2	0	0	0	0	0	0	0	0	0
K	A0A498L9T6	Histone H4	representative	TVTAMDVVYALKR	TVTAMDVVYALK[170]R	92	0	0	0	0	0	0	0	0	0	1	0	1	0	0	0	0	0	0	3
K	A0A498L9U1	Type I cytoskeletal 19-like protein	subsumed	NATINNANILLQIDNSKLAADDFR	NATINNANILLQIDN[115]SK[170]LAADDFR	174	0	0	0	0	0	0	0	0	0	0	0	0	0	0	0	0	0	0	1
K	A0A498L9U3	Histone H2A	subsumed	HLQLAVRNDEELNKLLGGVTIAQGGVLPNIQAVLLPK	HLQLAVRNDEELNK[170]LLGGVTIAQGGVLPNIQAVLLPK	96	0	0	2	0	0	0	0	0	0	0	0	0	0	0	0	0	0	0	0
K	A0A498L9U3	Histone H2A	subsumed	HLQLAVRNDEELNKLLGGVTIAQGGVLPNIQAVLLPK	HLQLAVRNDEELN[115]K[170]LLGGVTIAQGGVLPNIQAVLLPK	96	0	0	0	0	0	0	0	0	0	0	0	0	0	0	0	0	0	0	1
K	A0A498L9U3	Histone H2A	subsumed	HLQLAVRNDEELNKLLGGVTIAQGGVLPNIQAVLLPK	HLQLAVRN[115]DEELNK[170]LLGGVTIAQGGVLPNIQAVLLPK	96	0	0	0	0	0	0	0	0	0	0	0	0	0	0	0	2	0	0	0
K	A0A498L9U3	Histone H2A	subsumed	HLQLAVRNDEELNKLLGGVTIAQGGVLPNIQAVLLPK	HLQLAVRN[115]DEELN[115]K[170]LLGGVTIAQGGVLPNIQAVLLPK	96	0	0	0	0	0	0	0	0	0	0	0	0	0	0	0	0	0	0	2
K	A0A498L9U3	Histone H2A	subsumed	NDEELNKLLGGVTIAQGGVLPNIQAVLLPK	NDEELNK[170]LLGGVTIAQGGVLPNIQAVLLPK	96	0	0	0	0	0	0	0	0	0	0	0	0	0	1	0	0	1	0	0
K	A0A498L9U3	Histone H2A	subsumed	NDEELNKLLGGVTIAQGGVLPNIQAVLLPK	NDEELN[115]K[170]LLGGVTIAQGGVLPNIQAVLLPK	96	0	0	1	0	0	0	0	0	0	0	0	0	0	1	0	0	0	0	2
K	A0A498L9U3	Histone H2A	subsumed	NDEELNKLLGGVTIAQGGVLPNIQAVLLPK	N[115]DEELN[115]K[170]LLGGVTIAQGGVLPNIQAVLLPK	96	0	0	0	0	0	0	0	0	0	0	0	0	0	0	0	0	0	0	1
K	A0A498L9U3	Histone H2A	subsumed	NDEELNKLLGGVTIAQGGVLPNIQAVLLPKK	NDEELNKLLGGVTIAQGGVLPN[115]IQAVLLPK[170]K	119	0	0	0	0	0	0	0	0	0	0	0	0	0	0	0	0	0	0	1
K	A0A498L9U3	Histone H2A	subsumed	VTIAQGGVLPNIQAVLLPKK	VTIAQGGVLPNIQAVLLPK[170]K	119	0	0	0	1	0	0	0	0	0	0	0	0	0	0	0	0	0	0	0
K	A0A498L9V4	Histone H1-like protein	indistinguishable representative	ALAAGGYDVEKNNSR	ALAAGGYDVEK[170]NN[115]SR[170]	67	0	0	0	0	0	0	0	0	1	0	0	0	0	0	0	0	0	0	0
K	A0A498L9V4	Histone H1-like protein	indistinguishable representative	ALAAGGYDVEKNNSR	ALAAGGYDVEK[170]N[115]NSR	67	0	0	0	0	0	0	0	0	0	0	0	0	0	0	0	0	1	0	5
K	A0A498L9V4	Histone H1-like protein	indistinguishable representative	ALAAGGYDVEKNNSR	ALAAGGYDVEK[170]N[115]NSR[170]	67	0	0	0	0	0	0	0	0	3	3	2	7	0	0	0	0	9	0	0
K	A0A498L9V4	Histone H1-like protein	indistinguishable representative	GTLVQVKGTGASGSFK	n[43]GTLVQVK[170]GTGASGSFK	83, 89	0	0	0	0	0	0	0	0	0	0	0	0	0	0	0	0	2	0	2
K	A0A498L9V4	Histone H1-like protein	indistinguishable representative	KAGPGVGDLIVKAVSASK	KAGPGVGDLIVK[170]AVSASK	38	0	0	0	0	0	0	0	0	0	0	0	0	0	0	0	0	1	0	0
K	A0A498L9V4	Histone H1-like protein	indistinguishable representative	KALAAGGYDVEKNNSR	KALAAGGYDVEK[170]NNSR	67	0	0	0	0	0	0	0	0	0	0	0	0	0	0	0	0	2	0	0
K	A0A498L9V4	Histone H1-like protein	indistinguishable representative	KALAAGGYDVEKNNSR	KALAAGGYDVEK[170]N[115]NSR	67	0	0	0	0	0	0	0	0	0	0	0	0	0	0	0	0	3	0	0
K	A0A498L9V4	Histone H1-like protein	indistinguishable representative	KALAAGGYDVEKNNSR	KALAAGGYDVEK[170]N[115]NSR[170]	67	0	0	0	0	0	0	0	0	0	0	0	0	0	0	0	0	1	0	0
K	A0A498L9V4	Histone H1-like protein	indistinguishable representative	KALAAGGYDVEKNNSR	n[15]K[170]ALAAGGYDVEKNNSR	56	0	0	0	0	0	0	0	0	0	0	0	0	0	0	0	0	1	0	0
K	A0A498L9V4	Histone H1-like protein	indistinguishable representative	SGVSLAALKK	SGVSLAALK[170]K	55	0	0	0	0	0	0	0	0	0	0	0	0	0	0	0	0	1	0	0
K	A0A498L9X1	Myofibril-bound serine ase	representative	DSCQGDSGGPVVCNGK	DSC[160]QGDSGGPVVC[160]NGK[170]	148	0	0	0	0	0	0	0	0	2	0	0	0	0	0	0	0	0	0	0
K	A0A498L9X1	Myofibril-bound serine ase	representative	DSCQGDSGGPVVCNGK	DSC[160]QGDSGGPVVC[160]N[115]GK[170]	148	0	0	0	0	0	0	0	0	3	0	0	0	0	0	0	0	0	0	0
K	A0A498LA35	Alpha-1,4 glucan phosphorylase (EC 2.4.1.1)	canonical	VEDVAKMDKEGYDALQYYENLPELK	VEDVAK[170]MDKEGYDALQYYENLPELK	681	0	0	0	0	0	0	0	0	0	0	0	0	0	0	0	1	0	0	0
K	A0A498LA53	Type I cytoskeletal 13-like protein	canonical	EHYEAVANKNRK	EHYEAVAN[115]K[170]NRK	263	0	0	0	0	0	0	0	0	0	0	0	0	0	0	0	0	0	0	4
K	A0A498LA53	Type I cytoskeletal 13-like protein	canonical	KVVTIVEEVVDGK	n[15]K[170]VVTIVEEVVDGK	405	0	1	0	0	0	0	0	0	0	0	0	0	0	0	0	0	0	0	0
K	A0A498LA53	Type I cytoskeletal 13-like protein	canonical	KVVTIVEEVVDGKVVSSSSQSK	KVVTIVEEVVDGK[170]VVSSSSQSK	417	0	0	0	0	0	0	0	0	0	1	0	0	0	0	0	0	0	0	2
K	A0A498LA53	Type I cytoskeletal 13-like protein	canonical	SEALNKEVAVSTETLQISR	SEALNK[170]EVAVSTETLQISR	281	0	0	0	0	0	0	0	0	0	0	0	0	0	0	0	0	0	0	1
K	A0A498LA53	Type I cytoskeletal 13-like protein	canonical	SEALNKEVAVSTETLQISR	SEALN[115]K[170]EVAVSTETLQISR	281	0	0	0	0	0	0	0	0	0	0	0	0	0	1	0	0	0	0	1
K	A0A498LA53	Type I cytoskeletal 13-like protein	canonical	SEALNKEVAVSTETLQISR	n[15]SEALN[115]K[170]EVAVSTETLQISR	281	0	1	0	1	0	0	0	0	0	0	0	0	0	0	0	0	0	0	0
K	A0A498LA53	Type I cytoskeletal 13-like protein	canonical	SLEKANADLELK	n[43]SLEK[170]ANADLELK	101, 104	0	0	0	0	0	0	0	0	0	0	0	0	0	0	0	0	0	0	2
K	A0A498LA61	Gamma-enolase	canonical	AGAAEKGVPLYR	AGAAEK[170]GVPLYR	126	0	0	0	0	0	0	0	0	0	0	0	0	0	0	0	1	0	0	0
K	A0A498LA61	Gamma-enolase	canonical	AVGHINDTLGPALIASEISVVEQEKLDNMMIEMDGTENK	AVGHINDTLGPALIASEISVVEQEK[170]LDNM[147]MIEMDGTENK	89	0	0	0	0	0	0	1	0	0	0	0	0	0	0	0	0	0	0	0
K	A0A498LA73	Histone H3	indistinguishable	EIAQDFKTDLR	EIAQDFK[170]TDLR	80	0	0	0	0	0	0	0	0	0	2	0	0	0	0	0	0	2	0	2
K	A0A498LA73	Histone H3	indistinguishable	FQSAAIGALQEASEAYLVGLFEDTNLCAIHAKR	FQSAAIGALQEASEAYLVGLFEDTN[115]LC[160]AIHAK[170]R	116	0	0	0	0	0	0	0	0	0	0	0	0	0	0	0	2	2	0	3
K	A0A498LA73	Histone H3	indistinguishable	FQSAAIGALQEASEAYLVGLFEDTNLCAIHAKR	FQSAAIGALQEASEAYLVGLFEDTN[115]LC[160]AIHAK[170]R[170]	116	0	0	0	0	0	0	0	0	0	0	0	0	0	0	0	2	2	0	1
K	A0A498LA73	Histone H3	indistinguishable	KSAPSTGGVKKPHR	n[43]KSAPSTGGVK[170]KPHR	28, 37	0	0	0	0	0	0	0	0	0	2	0	0	0	0	0	0	0	0	0
K	A0A498LA73	Histone H3	indistinguishable	KSAPSTGGVKKPHR	n[43]K[170]SAPSTGGVK[142]KPHR	28	0	0	0	0	0	0	0	0	0	0	0	0	0	0	0	0	0	0	2
K	A0A498LA73	Histone H3	indistinguishable	KSTGGKAPR	n[43]KSTGGK[170]APR	10, 15	0	0	0	0	0	0	0	0	0	0	0	0	0	0	0	8	8	0	10
K	A0A498LA73	Histone H3	indistinguishable	QLATKAAR	QLATK[170]AAR	24	0	0	0	1	0	0	0	0	0	0	0	0	0	0	0	7	5	0	5
K	A0A498LA73	Histone H3	indistinguishable	RVTIMPKDIQLAR	RVTIMPK[170]DIQLAR	123	0	0	0	0	0	0	0	0	0	0	1	0	0	0	0	0	0	0	0
K	A0A498LA73	Histone H3	indistinguishable	VTIMPKDIQLAR	VTIMPK[170]DIQLAR	123	0	0	0	0	0	0	0	0	0	0	0	0	0	0	0	0	0	0	1
K	A0A498LA73	Histone H3	indistinguishable	YQKSTELLIR	YQK[170]STELLIR	57	0	0	0	0	0	0	0	0	0	1	1	0	0	0	0	0	2	0	1
K	A0A498LAB9	Peptidyl-prolyl cis-trans isomerase (PPIase) (EC 5.2.1.8)	canonical	DTNGSQFFITTVQTPWLDGKHVVFGK	DTN[115]GSQFFITTVQTPW[202]LDGK[170]HVVFGK	165	0	0	0	0	0	0	0	0	0	0	0	0	0	0	0	1	0	0	0
K	A0A498LAB9	Peptidyl-prolyl cis-trans isomerase (PPIase) (EC 5.2.1.8)	canonical	GDGTGGKSIYGDRFPDENFK	GDGTGGK[170]SIYGDRFPDENFK	116	0	0	0	0	0	0	0	0	0	0	0	0	0	0	0	0	0	0	1
K	A0A498LAB9	Peptidyl-prolyl cis-trans isomerase (PPIase) (EC 5.2.1.8)	canonical	HVVFGKILEGMDVVR	HVVFGK[170]ILEGMDVVR	171	0	0	0	0	0	0	0	0	0	0	0	0	0	0	0	1	0	0	1
K	A0A498LAB9	Peptidyl-prolyl cis-trans isomerase (PPIase) (EC 5.2.1.8)	canonical	HYGPGWLSMANAGK	HYGPGWLSM[147]ANAGK[170]	145	0	0	0	0	0	0	0	0	0	1	0	0	0	0	0	0	0	0	0
K	A0A498LAB9	Peptidyl-prolyl cis-trans isomerase (PPIase) (EC 5.2.1.8)	canonical	HYGPGWLSMANAGKDTNGSQFFITTVQTPWLDGK	HYGPGWLSM[147]ANAGK[170]DTNGSQFFITTVQTPWLDGK	145	0	0	0	0	0	0	0	0	0	0	0	0	0	0	0	1	0	0	0
K	A0A498LAB9	Peptidyl-prolyl cis-trans isomerase (PPIase) (EC 5.2.1.8)	canonical	TVPKTTENFLQLATGEK	TVPK[170]TTENFLQLATGEK	71	0	0	0	0	0	0	0	0	0	0	0	0	0	0	0	1	0	0	1
K	A0A498LAB9	Peptidyl-prolyl cis-trans isomerase (PPIase) (EC 5.2.1.8)	canonical	TVPKTTENFLQLATGEK	TVPK[170]TTEN[115]FLQLATGEK	71	0	0	0	0	0	0	0	0	0	0	0	0	0	0	0	0	0	0	1
K	A0A498LAB9	Peptidyl-prolyl cis-trans isomerase (PPIase) (EC 5.2.1.8)	canonical	TVPKTTENFLQLATGEK	n[15]TVPK[170]TTENFLQLATGEK	71	0	0	0	0	0	0	0	0	0	0	0	0	0	0	0	1	0	0	0
K	A0A498LAB9	Peptidyl-prolyl cis-trans isomerase (PPIase) (EC 5.2.1.8)	canonical	VIKDFMIQGGDFTR	VIK[170]DFMIQGGDFTR	98	0	0	0	0	0	0	0	0	1	0	0	0	0	0	0	0	0	0	0
K	A0A498LAB9	Peptidyl-prolyl cis-trans isomerase (PPIase) (EC 5.2.1.8)	canonical	VIKDFMIQGGDFTR	n[43]VIK[170]DFMIQGGDFTR	96, 98	0	0	0	0	0	0	0	0	0	0	0	0	0	0	0	2	0	0	0
K	A0A498LAB9	Peptidyl-prolyl cis-trans isomerase (PPIase) (EC 5.2.1.8)	canonical	VIKDFMIQGGDFTRGDGTGGK	VIK[170]DFM[147]IQGGDFTRGDGTGGK	98	0	0	0	0	0	0	0	0	0	0	0	0	0	0	0	2	0	0	0
K	A0A498LAB9	Peptidyl-prolyl cis-trans isomerase (PPIase) (EC 5.2.1.8)	canonical	VIKDFMIQGGDFTRGDGTGGK	n[43]VIK[170]DFMIQGGDFTRGDGTGGK	96, 98	0	0	0	0	0	0	0	0	0	0	2	0	0	0	0	2	0	0	4
K	A0A498LAD7	Myosin heavy fast skeletal muscle-like protein	canonical	ADIAESQVNKLR	ADIAESQVN[115]K[170]LR	398	0	0	3	0	0	0	0	0	0	0	0	0	0	0	0	0	0	0	0
K	A0A498LAD7	Myosin heavy fast skeletal muscle-like protein	canonical	IEDMAMMTHLNEPTVLYNLK	IEDMAMMTHLN[115]EPTVLYNLK[170]	107	1	0	0	0	0	0	0	0	0	0	0	0	0	0	0	0	0	0	0
K	A0A498LAD7	Myosin heavy fast skeletal muscle-like protein	canonical	LEAQNKPFDAKTAYFVTDPKEMYLK	LEAQNKPFDAK[170]TAYFVTDPK[170]EMYLK	35, 44	0	0	0	0	0	0	0	0	0	0	0	0	0	0	0	2	0	0	0
K	A0A498LAD7	Myosin heavy fast skeletal muscle-like protein	canonical	RIEAPPHIFSISDNAYQFMLTDRENQSILITGESGAGK	RIEAPPHIFSISDNAYQFMLTDRENQSILITGESGAGK[170]	185	0	0	0	0	0	0	0	0	0	1	0	0	0	0	0	0	0	0	0
K	A0A498LAD9	Ubiquitin-40S ribosomal S27a	indistinguishable representative	LIFAGKQLEDGR	n[43]LIFAGK[170]QLEDGR	43, 48	0	0	0	0	0	0	0	0	0	0	0	0	0	0	0	0	0	0	6
K	A0A498LAD9	Ubiquitin-40S ribosomal S27a	indistinguishable representative	LIFAGKQLEDGRTLSDYNIQK	n[43]LIFAGK[170]QLEDGRTLSDYNIQK	43, 48	0	0	0	0	0	0	0	0	0	0	0	0	0	0	0	0	0	0	2
K	A0A498LAD9	Ubiquitin-40S ribosomal S27a	indistinguishable representative	TITLEVEPSDTIENVKAK	TITLEVEPSDTIEN[115]VK[170]AK	27	0	0	0	0	0	0	0	0	0	0	0	0	0	0	0	0	0	0	1
K	A0A498LAD9	Ubiquitin-40S ribosomal S27a	indistinguishable representative	TLSDYNIQKESTLHLVLR	n[43]TLSDYNIQK[170]ESTLHLVLR	55, 63	0	0	0	0	0	0	0	0	0	0	0	0	0	0	0	2	2	0	2
K	A0A498LAD9	Ubiquitin-40S ribosomal S27a	indistinguishable representative	TLSDYNIQKESTLHLVLR	n[43]TLSDYN[115]IQK[170]ESTLHLVLR	55, 63	0	0	0	0	0	0	0	0	0	0	0	0	0	0	0	0	0	0	2
K	A0A498LAD9	Ubiquitin-40S ribosomal S27a	indistinguishable representative	TLTGKTITLEVEPSDTIENVK	TLTGK[170]TITLEVEPSDTIENVK	11	0	0	0	0	0	0	0	0	0	0	0	0	0	0	0	0	3	0	3
K	A0A498LAF5	Unconventional myosin-Ic isoform X1	canonical	KHLMEIPPDATHEAEIYMGSPSITEQGLR	n[43]K[170]HLMEIPPDATHEAEIYM[147]GSPSITEQGLR	864	0	0	0	0	0	0	0	0	0	0	4	0	0	0	0	0	0	0	0
K	A0A498LAF5	Unconventional myosin-Ic isoform X1	canonical	KHLMEIPPDATHEAEIYMGSPSITEQGLR	n[43]K[170]HLM[147]EIPPDATHEAEIYMGSPSITEQGLR	864	0	0	0	0	0	0	0	0	0	0	2	0	0	0	0	0	0	0	0
K	A0A498LAG7	Myosin-2 heavy chain-like protein	subsumed	ILKVISQMEEIWK	ILK[170]VISQMEEIWK	374	0	0	0	0	0	0	0	0	0	0	0	0	0	0	0	0	0	0	1
K	A0A498LAG7	Myosin-2 heavy chain-like protein	subsumed	LIALQGANKQIADLQEK	LIALQGAN[115]K[170]QIADLQEK	703	0	0	0	0	0	0	0	0	0	0	0	0	0	0	0	0	0	0	3
K	A0A498LAH2	Dihydrolipoyl dehydrogenase (EC 1.8.1.4)	canonical	NQVTAKTAEGEQVINTK	NQVTAK[170]TAEGEQVINTK	165	0	0	1	0	0	0	0	0	0	0	0	0	0	0	0	0	0	0	0
K	A0A498LAH2	Dihydrolipoyl dehydrogenase (EC 1.8.1.4)	canonical	SGAVKALTGGIAHLFK	SGAVK[170]ALTGGIAHLFK	132	0	0	1	0	0	0	0	0	0	0	1	0	0	0	0	0	0	0	0
K	A0A498LAI7	Polyadenylate-binding protein (PABP)	canonical	IVATKPLYVALAQR	IVATK[170]PLYVALAQR	361	0	0	0	0	0	0	0	0	0	0	0	0	0	1	0	0	0	0	6
K	A0A498LAI7	Polyadenylate-binding protein (PABP)	canonical	IVATKPLYVALAQR	n[15]IVATK[170]PLYVALAQR	361	0	0	0	0	0	0	0	0	0	0	0	0	0	0	0	2	0	0	0
K	A0A498LAK0	Fascin	canonical	SSKVGKDELFVLEQSHPQVVLTAGNDR	SSK[170]VGKDELFVLEQSHPQVVLTAGNDR	244	0	0	1	0	0	0	0	0	0	0	0	0	0	0	0	0	0	0	0
K	A0A498LAK0	Fascin	canonical	VGKDELFVLEQSHPQVVLTAGNDR	VGK[170]DELFVLEQSHPQVVLTAGNDR	247	0	0	1	0	0	0	0	0	0	0	0	0	0	0	0	0	0	0	0
K	A0A498LAK0	Fascin	canonical	VGKDELFVLEQSHPQVVLTAGNDR	n[43]VGK[170]DELFVLEQSHPQVVLTAGNDR	245, 247	0	0	0	0	0	0	0	0	0	0	0	0	0	0	0	0	0	0	2
K	A0A498LAL7	Cellular retinoic acid-binding 1	canonical	SSENFDELLKALGVNAMLR	SSENFDELLK[170]ALGVNAMLR	22	0	0	0	0	0	0	0	0	0	0	0	0	0	0	0	0	0	0	1
K	A0A498LAU6	L-lactate dehydrogenase (EC 1.1.1.27)	indistinguishable representative	IVADKDYSVTANSK	IVADK[170]DYSVTANSK	101	0	0	0	0	1	0	0	0	0	0	0	0	0	1	0	0	0	0	0
K	A0A498LAU6	L-lactate dehydrogenase (EC 1.1.1.27)	indistinguishable representative	IVADKDYSVTANSK	n[43]IVADK[170]DYSVTANSK	97, 101	0	0	0	0	0	0	0	0	0	0	0	0	0	0	0	0	2	0	0
K	A0A498LAU6	L-lactate dehydrogenase (EC 1.1.1.27)	indistinguishable representative	IVADKDYSVTANSKVVVVTAGAR	IVADKDYSVTAN[115]SK[170]VVVVTAGAR	110	1	0	0	0	1	0	0	0	0	0	0	0	0	0	0	0	0	0	0
K	A0A498LAU6	L-lactate dehydrogenase (EC 1.1.1.27)	indistinguishable representative	LGIHPSSCHGWVIGEHGDSSVPVWSGVNVAGVSLQGLNPDMGTEK	LGIHPSSC[160]HGWVIGEHGDSSVPVWSGVNVAGVSLQGLNPDM[147]GTEK[170]	242	1	0	0	0	0	0	0	0	0	0	0	0	0	0	0	0	0	0	0
K	A0A498LAU6	L-lactate dehydrogenase (EC 1.1.1.27)	indistinguishable representative	LGIHPSSCHGWVIGEHGDSSVPVWSGVNVAGVSLQGLNPDMGTEK	LGIHPSSC[160]HGWVIGEHGDSSVPVWSGVN[115]VAGVSLQGLNPDM[147]GTEK[170]	242	1	0	0	0	0	0	0	0	0	0	0	0	0	0	0	0	0	0	0
K	A0A498LAU6	L-lactate dehydrogenase (EC 1.1.1.27)	indistinguishable representative	LIAHVSKEEPAGPTNK	LIAHVSK[170]EEPAGPTNK	33	0	0	0	0	0	0	0	0	0	0	0	0	0	0	0	0	0	0	1
K	A0A498LAU6	L-lactate dehydrogenase (EC 1.1.1.27)	indistinguishable representative	LKGEAMDLQHGSLFLK	n[15]LK[170]GEAMDLQHGSLFLK	79	1	0	0	0	0	0	0	0	0	0	0	0	0	0	0	0	0	0	0
K	A0A498LAU6	L-lactate dehydrogenase (EC 1.1.1.27)	indistinguishable representative	SAETLWGVQKELTL	SAETLWGVQK[170]ELTL	348	0	0	0	0	0	0	0	0	0	0	0	0	0	0	0	0	0	0	1
K	A0A498LAU6	L-lactate dehydrogenase (EC 1.1.1.27)	indistinguishable representative	THKIVADKDYSVTANSK	THK[170]IVADKDYSVTANSK	96	0	0	1	0	0	0	0	0	0	0	1	0	0	0	0	0	2	0	1
K	A0A498LAU6	L-lactate dehydrogenase (EC 1.1.1.27)	indistinguishable representative	THKIVADKDYSVTANSK	THK[170]IVADK[142]DYSVTANSK	96	1	0	0	0	0	0	0	0	0	0	0	0	0	0	0	0	0	0	0
K	A0A498LAU6	L-lactate dehydrogenase (EC 1.1.1.27)	indistinguishable representative	THKIVADKDYSVTANSK	n[43]THK[170]IVADK[142]DYSVTANSK	94, 96	0	0	0	0	2	0	0	0	0	0	0	0	0	0	0	0	0	0	0
K	A0A498LAX2	40S ribosomal S5	canonical	AEDWEAVPAVAETPEIKLFGK	n[43]AEDWEAVPAVAETPEIK[170]LFGK	2, 18	0	0	0	0	0	0	0	0	0	0	0	0	0	0	0	2	0	0	0
K	A0A498LAX2	40S ribosomal S5	canonical	NIKTIAECLADELINAAK	n[43]N[115]IK[170]TIAEC[160]LADELINAAK	165, 167	0	0	0	0	0	0	0	0	0	0	0	0	0	0	0	2	0	0	0
K	A0A498LAX2	40S ribosomal S5	canonical	TIAECLADELINAAKGSSNSYAIK	TIAEC[160]LADELINAAK[170]GSSN[115]SYAIK	182	0	0	0	0	0	0	0	0	0	0	0	0	0	0	0	2	0	0	0
K	A0A498LAX4	Citrate synthase	canonical	LVAQLYKIVPNVLLEQGK	LVAQLYK[170]IVPNVLLEQGK	906	0	0	0	0	0	0	0	0	0	0	1	0	0	0	0	0	0	0	0
K	A0A498LB05	Isocitrate dehydrogenase [NADP] mitochondrial	canonical	EHQKGRPTSTNPIASIFAWTR	EHQK[170]GRPTSTN[115]PIASIFAWTR	799	0	0	2	0	0	0	0	0	0	0	0	0	0	0	0	0	0	0	0
K	A0A498LB05	Isocitrate dehydrogenase [NADP] mitochondrial	canonical	GKLDGNPDLIKFSQTLER	GKLDGNPDLIK[170]FSQTLER	832	0	0	2	0	0	0	0	0	0	0	0	0	0	0	0	0	0	0	0
K	A0A498LB05	Isocitrate dehydrogenase [NADP] mitochondrial	canonical	HAHGDQYKATDFVVSQPGK	HAHGDQYK[170]ATDFVVSQPGK	619	0	0	5	0	2	0	0	0	0	0	2	0	0	4	0	0	5	0	1
K	A0A498LB05	Isocitrate dehydrogenase [NADP] mitochondrial	canonical	HAHGDQYKATDFVVSQPGKFK	HAHGDQYKATDFVVSQPGK[170]FK	630	0	0	1	0	0	0	0	0	0	0	0	0	0	0	0	0	0	0	0
K	A0A498LB05	Isocitrate dehydrogenase [NADP] mitochondrial	canonical	HAHGDQYKATDFVVSQPGKFK	HAHGDQYK[170]ATDFVVSQPGKFK	619	0	0	1	0	0	0	0	0	0	0	0	0	0	0	0	0	0	0	0
K	A0A498LB05	Isocitrate dehydrogenase [NADP] mitochondrial	canonical	IKVAKPVVEMDGDEMTR	n[43]IK[170]VAKPVVEMDGDEMTR	483, 484	0	0	2	0	0	0	0	0	0	0	0	0	0	0	0	0	0	0	0
K	A0A498LB05	Isocitrate dehydrogenase [NADP] mitochondrial	canonical	LIDDMVAQVLKSSGAFVWACK	LIDDMVAQVLK[170]SSGAFVWAC[160]K	738	0	0	1	0	0	0	0	0	0	0	0	0	0	0	0	0	0	0	0
K	A0A498LB05	Isocitrate dehydrogenase [NADP] mitochondrial	canonical	LNEHYVNTTDFLDAIKTNLDK	LNEHYVNTTDFLDAIKTN[115]LDK[170]	886	0	0	1	0	0	0	0	0	0	0	0	0	0	0	0	0	0	0	0
K	A0A498LB05	Isocitrate dehydrogenase [NADP] mitochondrial	canonical	LNEHYVNTTDFLDAIKTNLDK	LNEHYVNTTDFLDAIK[170]TN[115]LDK	881	0	0	1	0	0	0	0	0	0	0	0	0	0	0	0	0	0	0	0
K	A0A498LB05	Isocitrate dehydrogenase [NADP] mitochondrial	canonical	YNVAVKCATITPDEAR	YNVAVK[170]C[160]ATITPDEAR	551	0	0	1	0	1	0	0	0	0	0	0	0	0	0	0	0	0	0	0
K	A0A498LB17	Tropomyosin alpha-3 chain isoform X6	canonical	ALDQTLKSLQASEEK	ALDQTLK[170]SLQASEEK	169	0	0	0	0	0	0	0	0	0	0	0	0	0	0	0	0	0	0	3
K	A0A498LB17	Tropomyosin alpha-3 chain isoform X6	canonical	ALKDEEKMELQEIQLK	ALKDEEK[170]MELQEIQLK	104	0	0	0	0	1	0	0	0	0	0	0	0	0	0	0	0	0	0	6
K	A0A498LB17	Tropomyosin alpha-3 chain isoform X6	canonical	ALKDEEKMELQEIQLK	ALKDEEK[170]M[147]ELQEIQLK	104	0	0	0	0	3	0	0	0	0	0	0	0	0	0	0	0	0	0	0
K	A0A498LB17	Tropomyosin alpha-3 chain isoform X6	canonical	ALKDEEKMELQEIQLK	ALK[170]DEEKMELQEIQLK	100	0	0	1	0	0	0	0	0	0	0	0	0	0	0	0	0	0	0	1
K	A0A498LB17	Tropomyosin alpha-3 chain isoform X6	canonical	ALKDEEKMELQEIQLK	ALK[170]DEEKM[147]ELQEIQLK	100	0	0	0	0	1	0	0	0	0	0	0	0	0	0	0	0	0	0	0
K	A0A498LB17	Tropomyosin alpha-3 chain isoform X6	canonical	ALKDEEKMELQEIQLK	n[43]ALKDEEK[170]MELQEIQLK	98, 104	0	0	2	0	0	0	0	0	0	0	0	0	0	0	0	0	0	0	0
K	A0A498LB17	Tropomyosin alpha-3 chain isoform X6	canonical	ALKDEEKMELQEIQLK	n[43]ALK[170]DEEKMELQEIQLK	98, 100	0	0	0	0	2	0	0	0	0	0	0	0	0	0	0	0	0	0	6
K	A0A498LB17	Tropomyosin alpha-3 chain isoform X6	canonical	EAKHIAEEADR	EAK[170]HIAEEADR	116	0	0	0	0	0	0	0	0	0	0	0	0	0	0	0	0	0	0	7
K	A0A498LB17	Tropomyosin alpha-3 chain isoform X6	canonical	HIAEEADRKYEEVAR	HIAEEADRK[170]YEEVAR	125	0	0	0	0	0	0	0	0	0	0	0	0	0	0	0	0	0	0	2
K	A0A498LB17	Tropomyosin alpha-3 chain isoform X6	canonical	LATALQKLEEAEKAADESER	LATALQKLEEAEK[170]AADESER	82	0	0	0	0	0	0	0	0	0	0	0	0	0	0	0	0	0	0	7
K	A0A498LB17	Tropomyosin alpha-3 chain isoform X6	canonical	LATALQKLEEAEKAADESER	LATALQK[170]LEEAEKAADESER	76	4	0	0	0	0	0	0	0	0	1	0	0	0	0	0	0	0	0	9
K	A0A498LB17	Tropomyosin alpha-3 chain isoform X6	canonical	LATALQKLEEAEKAADESER	n[15]LATALQK[170]LEEAEKAADESER	76	2	0	0	0	0	0	0	0	0	0	0	0	0	0	0	0	0	0	0
K	A0A498LB17	Tropomyosin alpha-3 chain isoform X6	canonical	LATALQKLEEAEKAADESER	n[43]LATALQK[170]LEEAEKAADESER	70, 76	0	0	0	0	0	0	0	0	0	2	0	0	0	0	0	0	0	0	2
K	A0A498LB17	Tropomyosin alpha-3 chain isoform X6	canonical	LEEAEKAADESER	LEEAEK[170]AADESER	82	0	0	0	0	0	0	0	0	0	0	0	0	0	0	0	0	0	0	5
K	A0A498LB17	Tropomyosin alpha-3 chain isoform X6	canonical	LEKTIDDLEDELYAQK	LEK[170]TIDDLEDELYAQK	215	2	0	0	0	1	0	0	0	0	0	0	0	0	0	0	0	0	0	0
K	A0A498LB17	Tropomyosin alpha-3 chain isoform X6	canonical	TEERAELAESHVKQMEEELR	TEERAELAESHVK[170]QMEEELR	155	0	0	0	0	0	0	0	0	0	0	0	0	0	0	0	0	0	0	1
K	A0A498LB27	Pyruvate mitochondrial-like protein	subsumed	VAKENNVDAIHPGYGFLSER	VAK[170]ENNVDAIHPGYGFLSER	98	0	0	0	0	0	0	0	0	0	0	0	0	0	0	0	1	0	0	0
K	A0A498LB27	Pyruvate mitochondrial-like protein	subsumed	VAKENNVDAIHPGYGFLSER	VAK[170]EN[115]NVDAIHPGYGFLSER	98	0	0	0	0	0	0	0	0	0	0	0	0	0	0	0	1	0	0	0
K	A0A498LB27	Pyruvate mitochondrial-like protein	subsumed	VAKENNVDAIHPGYGFLSER	n[43]VAK[170]EN[115]NVDAIHPGYGFLSER	96, 98	0	0	0	0	0	0	0	0	0	0	0	0	0	0	0	2	0	0	0
K	A0A498LB77	Cysteine and glycine-rich 1	indistinguishable representative	GYGYGAGAGTLSMDKGESLGIKPVEAPDHQPTNNPNTSK	GYGYGAGAGTLSMDK[142]GESLGIK[170]PVEAPDHQPTNNPNTSK	60	0	0	0	0	0	0	0	7	0	0	0	0	0	0	0	0	0	0	0
K	A0A498LB77	Cysteine and glycine-rich 1	indistinguishable representative	GYGYGAGAGTLSMDKGESLGIKPVEAPDHQPTNNPNTSK	GYGYGAGAGTLSMDK[142]GESLGIK[170]PVEAPDHQPTNNPN[115]TSK	60	0	0	0	0	0	0	0	2	0	0	0	0	0	0	0	0	0	0	0
K	A0A498LB77	Cysteine and glycine-rich 1	indistinguishable representative	GYGYGAGAGTLSMDKGESLGIKPVEAPDHQPTNNPNTSK	GYGYGAGAGTLSMDK[142]GESLGIK[170]PVEAPDHQPTNN[115]PNTSK	60	0	0	0	0	0	0	0	1	0	0	0	0	0	0	0	0	0	0	0
K	A0A498LB77	Cysteine and glycine-rich 1	indistinguishable representative	GYGYGAGAGTLSMDKGESLGIKPVEAPDHQPTNNPNTSK	GYGYGAGAGTLSMDK[142]GESLGIK[170]PVEAPDHQPTN[115]NPNTSK	60	0	0	0	0	0	0	0	6	0	0	0	0	0	0	0	0	0	0	0
K	A0A498LB77	Cysteine and glycine-rich 1	indistinguishable representative	GYGYGAGAGTLSMDKGESLGIKPVEAPDHQPTNNPNTSK	GYGYGAGAGTLSMDK[142]GESLGIK[170]PVEAPDHQPTN[115]NPN[115]TSK	60	0	0	0	0	0	0	0	1	0	0	0	0	0	0	0	0	0	0	0
K	A0A498LB77	Cysteine and glycine-rich 1	indistinguishable representative	GYGYGAGAGTLSMDKGESLGIKPVEAPDHQPTNNPNTSK	GYGYGAGAGTLSMDK[170]GESLGIKPVEAPDHQPTNNPNTSK	53	0	0	0	0	0	0	0	2	0	0	0	0	0	0	0	0	0	0	2
K	A0A498LB77	Cysteine and glycine-rich 1	indistinguishable representative	GYGYGAGAGTLSMDKGESLGIKPVEAPDHQPTNNPNTSK	GYGYGAGAGTLSMDK[170]GESLGIKPVEAPDHQPTN[115]NPNTSK	53	0	0	0	0	0	0	0	8	0	0	0	0	0	0	0	0	0	0	0
K	A0A498LB77	Cysteine and glycine-rich 1	indistinguishable representative	GYGYGAGAGTLSMDKGESLGIKPVEAPDHQPTNNPNTSK	GYGYGAGAGTLSMDK[170]GESLGIKPVEAPDHQPTN[115]N[115]PNTSK	53	0	0	0	0	0	0	0	1	0	0	0	0	0	0	0	0	0	0	0
K	A0A498LB77	Cysteine and glycine-rich 1	indistinguishable representative	GYGYGAGAGTLSMDKGESLGIKPVEAPDHQPTNNPNTSK	GYGYGAGAGTLSMDK[170]GESLGIK[142]PVEAPDHQPTN[115]NPNTSK	53	0	0	0	0	0	0	0	1	0	0	0	0	0	0	0	0	0	0	0
K	A0A498LB77	Cysteine and glycine-rich 1	indistinguishable representative	GYGYGAGAGTLSMDKGESLGIKPVEAPDHQPTNNPNTSK	GYGYGAGAGTLSM[147]DKGESLGIK[142]PVEAPDHQPTN[115]N[115]PNTSK[170]	77	0	0	0	0	0	0	0	1	0	0	0	0	0	0	0	0	0	0	0
K	A0A498LB77	Cysteine and glycine-rich 1	indistinguishable representative	GYGYGAGAGTLSMDKGESLGIKPVEAPDHQPTNNPNTSK	GYGYGAGAGTLSM[147]DK[170]GESLGIKPVEAPDHQPTNNPNTSK	53	0	0	0	0	0	0	0	4	0	0	0	0	0	0	0	1	0	0	0
K	A0A498LB77	Cysteine and glycine-rich 1	indistinguishable representative	GYGYGAGAGTLSMDKGESLGIKPVEAPDHQPTNNPNTSK	GYGYGAGAGTLSM[147]DK[170]GESLGIKPVEAPDHQPTNNPN[115]TSK	53	0	0	0	0	0	0	0	1	0	0	0	0	0	0	0	0	0	0	0
K	A0A498LB77	Cysteine and glycine-rich 1	indistinguishable representative	GYGYGAGAGTLSMDKGESLGIKPVEAPDHQPTNNPNTSK	GYGYGAGAGTLSM[147]DK[170]GESLGIKPVEAPDHQPTNN[115]PN[115]TSK	53	0	0	0	0	0	0	0	1	0	0	0	0	0	0	0	0	0	0	0
K	A0A498LB77	Cysteine and glycine-rich 1	indistinguishable representative	GYGYGAGAGTLSMDKGESLGIKPVEAPDHQPTNNPNTSK	GYGYGAGAGTLSM[147]DK[170]GESLGIKPVEAPDHQPTN[115]NPNTSK	53	0	0	0	0	0	0	0	2	0	0	0	0	0	0	0	0	0	0	0
K	A0A498LB77	Cysteine and glycine-rich 1	indistinguishable representative	GYGYGAGAGTLSMDKGESLGIKPVEAPDHQPTNNPNTSK	GYGYGAGAGTLSM[147]DK[170]GESLGIKPVEAPDHQPTN[115]N[115]PNTSK	53	0	0	0	0	0	0	0	1	0	0	0	0	0	0	0	0	0	0	0
K	A0A498LB77	Cysteine and glycine-rich 1	indistinguishable representative	GYGYGAGAGTLSMDKGESLGIKPVEAPDHQPTNNPNTSK	n[43]GYGYGAGAGTLSMDK[142]GESLGIK[170]PVEAPDHQPTNNPNTSK	39, 60	0	0	0	0	0	0	0	4	0	0	0	0	0	0	0	0	0	0	4
K	A0A498LB77	Cysteine and glycine-rich 1	indistinguishable representative	KNLDSTTVAVHENEIYCK	n[15]K[170]N[115]LDSTTVAVHENEIYC[160]K	11	0	0	0	0	0	0	0	2	0	0	0	0	0	0	0	0	0	0	0
K	A0A498LB77	Cysteine and glycine-rich 1	indistinguishable representative	NLDSTTVAVHENEIYCKACYGK	n[43]NLDSTTVAVHEN[115]EIYC[160]K[170]AC[160]YGK	12, 28	0	0	0	0	0	0	0	0	0	0	0	0	0	0	0	0	0	0	2
K	A0A498LBA7	Transitional endoplasmic reticulum ATPase-like protein	indistinguishable representative	AFEEAEKNAPAIIFIDELDAIAPK	AFEEAEK[170]N[115]APAIIFIDELDAIAPK	435	0	0	1	0	0	0	0	0	0	0	0	0	0	1	0	0	0	0	0
K	A0A498LBA7	Transitional endoplasmic reticulum ATPase-like protein	indistinguishable representative	AFEEAEKNAPAIIFIDELDAIAPKR	AFEEAEK[170]N[115]APAIIFIDELDAIAPKR	435	0	0	1	0	0	0	0	0	0	0	0	0	0	0	0	0	0	0	0
K	A0A498LBA7	Transitional endoplasmic reticulum ATPase-like protein	indistinguishable representative	KAFEEAEKNAPAIIFIDELDAIAPK	KAFEEAEK[170]N[115]APAIIFIDELDAIAPK	435	0	0	0	0	0	0	0	0	0	0	0	0	0	2	0	0	0	0	0
K	A0A498LBB3	60S ribosomal L23	canonical	LNRLPAAGVGDMVMATVKK	LNRLPAAGVGDMVMATVK[170]K	66	0	0	0	0	0	0	0	0	0	0	0	0	0	0	0	1	0	0	0
K	A0A498LBD6	40S ribosomal S17	subsumed	LLDFGSLSNLQVTQPPVGMNFKTPR	LLDFGSLSNLQVTQPPVGMN[115]FK[170]TPR	95	0	0	0	0	0	0	0	0	0	0	0	0	0	0	0	1	0	0	1
K	A0A498LBF9	Biglycan	canonical	GLTNLYALSLVNNMISK	GLTNLYALSLVN[115]NMISK[170]	131	0	0	0	0	0	0	1	0	0	0	0	0	0	0	0	0	0	0	0
K	A0A498LBF9	Biglycan	canonical	LTGIPKDLPDSLHELHLDNNQIQAIELEDLSR	LTGIPK[170]DLPDSLHELHLDNNQIQAIELEDLSR	228	0	0	0	0	0	0	0	0	0	0	0	0	0	0	0	0	0	0	1
K	A0A498LBF9	Biglycan	canonical	LTGIPKDLPDSLHELHLDNNQIQAIELEDLSR	LTGIPK[170]DLPDSLHELHLDN[115]NQIQAIELEDLSR	228	0	0	0	0	0	0	0	0	0	0	0	0	0	0	0	0	0	0	3
K	A0A498LBF9	Biglycan	canonical	LTGIPKDLPDSLHELHLDNNQIQAIELEDLSR	LTGIPK[170]DLPDSLHELHLDN[115]N[115]QIQAIELEDLSR	228	0	0	0	0	0	0	0	0	0	0	0	0	0	0	0	0	0	0	1
K	A0A498LBG8	Arginine-glutamic acid dipeptide repeats-like isoform X1	canonical	AAVPSGASTGIYEALELRDNDKSR	AAVPSGASTGIYEALELRDN[115]DK[170]SR	54	0	0	1	0	0	0	0	0	0	0	0	0	0	0	0	0	0	0	0
K	A0A498LBG8	Arginine-glutamic acid dipeptide repeats-like isoform X1	canonical	AAVPSGASTGIYEALELRDNDKSR	AAVPSGASTGIYEALELR[170]DN[115]DK[170]SR[170]	54	0	0	0	0	0	0	1	0	0	0	0	0	0	0	0	0	0	0	0
K	A0A498LBG8	Arginine-glutamic acid dipeptide repeats-like isoform X1	canonical	AGAAEKGVPLYR	AGAAEK[170]GVPLYR	126	0	0	0	0	0	0	0	0	0	0	0	0	0	0	0	1	0	0	0
K	A0A498LBG8	Arginine-glutamic acid dipeptide repeats-like isoform X1	canonical	AVEHVNQTIAPALISQGIPVVEQEKIDQFMLELDGTDNKSK	AVEHVNQTIAPALISQGIPVVEQEK[170]IDQFM[147]LELDGTDNKSK	89	0	0	0	0	0	0	1	0	0	0	0	0	0	0	0	0	0	0	0
K	A0A498LBG8	Arginine-glutamic acid dipeptide repeats-like isoform X1	canonical	DATNVGDEGGFAPNILENQEALELLKSAISK	DATNVGDEGGFAPN[115]ILENQEALELLK[170]SAISK	228	0	0	1	0	0	0	0	0	0	0	0	0	0	0	0	0	0	0	0
K	A0A498LBG8	Arginine-glutamic acid dipeptide repeats-like isoform X1	canonical	DGKYDLDFKSPDDPNR	DGKYDLDFK[170]SPDDPNR	262	0	0	1	0	0	0	0	0	0	0	0	0	0	0	0	0	0	0	0
K	A0A498LBG8	Arginine-glutamic acid dipeptide repeats-like isoform X1	canonical	DGKYDLDFKSPDDPNR	DGK[170]YDLDFKSPDDPNR	256	0	0	1	0	0	0	0	0	0	0	0	0	0	0	0	0	0	0	0
K	A0A498LBG8	Arginine-glutamic acid dipeptide repeats-like isoform X1	canonical	IADAVEKGACNCLLLK	IADAVEK[170]GAC[160]NC[160]LLLK	334	0	0	1	0	0	0	0	0	0	0	0	0	0	0	0	0	0	0	0
K	A0A498LBG8	Arginine-glutamic acid dipeptide repeats-like isoform X1	canonical	IGAEVYHNLKNVIK	IGAEVYHNLK[170]N[115]VIK	193	0	0	2	0	1	0	0	0	0	0	1	0	0	1	0	1	0	0	2
K	A0A498LBG8	Arginine-glutamic acid dipeptide repeats-like isoform X1	canonical	IGAEVYHNLKNVIK	IGAEVYHN[115]LK[170]NVIK	193	0	0	0	0	0	0	0	0	1	0	0	0	0	0	0	0	0	0	0
K	A0A498LBG8	Arginine-glutamic acid dipeptide repeats-like isoform X1	canonical	IGAEVYHNLKNVIK	IGAEVYHN[115]LK[170]NVIK[142]	193	0	0	0	0	1	0	0	0	0	0	0	0	0	0	0	0	0	0	0
K	A0A498LBG8	Arginine-glutamic acid dipeptide repeats-like isoform X1	canonical	KDLLPSKK	n[43]K[170]DLLPS[167]K[142]K	555	0	0	0	0	0	0	0	0	0	2	0	0	0	0	0	0	0	0	0
K	A0A498LBG8	Arginine-glutamic acid dipeptide repeats-like isoform X1	canonical	SGETEDTFIADLVVGLCTGQIKTGAPCR	SGETEDTFIADLVVGLC[160]TGQIK[170]TGAPC[160]R	394	2	0	2	0	1	0	0	0	0	0	0	0	0	0	0	0	0	0	0
K	A0A498LBI5	Cytoplasmic dynein 1 heavy chain 1 isoform X2	canonical	LPAFKDLVAKVQADEQFFMWIESNSPELSVPYLWTEEK	n[15]LPAFKDLVAKVQADEQFFMWIES[167]NS[167]PELS[167]VPYLWTEEK[170]	691	0	0	0	0	0	0	0	0	0	0	0	0	0	0	0	0	0	0	1
K	A0A498LBK2	Fructose-bisphosphate aldolase (EC 4.1.2.13)	canonical	DGADFAKWR	DGADFAK[170]WR	147	1	0	0	0	0	0	0	0	0	0	0	0	0	0	0	0	0	0	0
K	A0A498LBK2	Fructose-bisphosphate aldolase (EC 4.1.2.13)	canonical	IVSPGKGILAADESIGSMGK	IVSPGK[170]GILAADESIGSMGK	28	0	0	0	0	0	0	0	0	0	0	3	0	0	0	0	0	0	0	0
K	A0A498LBK2	Fructose-bisphosphate aldolase (EC 4.1.2.13)	canonical	IVSPGKGILAADESIGSMGKR	n[43]IVSPGK[170]GILAADESIGSMGKR	23, 28	0	0	0	0	0	0	0	0	0	0	2	0	0	0	0	0	0	0	0
K	A0A498LBK3	Major facilitator superfamily domain-containing 8 isoform X1	indistinguishable representative	MADDFIQQMNYPKMK	MADDFIQQMN[115]YPK[170]MK	246	0	0	0	0	0	0	0	0	0	0	0	0	0	0	0	0	0	0	1
K	A0A498LBM3	40S ribosomal protein S8	canonical	LTPEEEEILNKKR	LTPEEEEILN[115]K[170]KR	149	0	0	0	0	0	0	0	0	0	0	1	0	0	0	0	0	0	0	0
K	A0A498LBQ1	Tubulin beta chain	canonical	ALTVPELTQQVFDAKNMMAACDPR	ALTVPELTQQVFDAK[170]NMMAAC[160]DPR	297	0	0	0	0	0	0	0	0	0	0	1	0	0	0	0	0	0	0	0
K	A0A498LBQ1	Tubulin beta chain	canonical	EIVHLQAGQCGNQIGAKFWEVISDEHGIDPTGTYHGDSDLQLDR	EIVHLQAGQC[160]GNQIGAK[170]FWEVISDEHGIDPTGTYHGDSDLQLDR	19	0	0	0	0	0	0	0	0	0	0	1	0	0	0	0	0	0	0	0
K	A0A498LBQ1	Tubulin beta chain	canonical	ESESCDCLQGFQLTHSLGGGTGSGMGTLLISK	E[111]SESC[160]DC[160]LQGFQLTHSLGGGTGSGM[147]GTLLISK[170]	154	0	0	1	0	0	0	0	0	0	0	0	0	0	0	0	0	0	0	0
K	A0A498LBQ1	Tubulin beta chain	canonical	MSMKEVDEQMLNVQNK	MSMK[170]EVDEQMLNVQNK	324	0	0	0	0	0	0	0	0	0	0	3	0	0	0	0	0	0	0	2
K	A0A498LBQ1	Tubulin beta chain	canonical	NSSYFVEWIPNNVKTAVCDIPPR	NSSYFVEWIPNNVK[170]TAVC[160]DIPPR	350	0	0	0	0	0	0	1	0	0	0	2	0	0	0	0	0	0	0	0
K	A0A498LBQ1	Tubulin beta chain	canonical	TLKLTTPTYGDLNHLVSATMSGVTTCLR	TLK[170]LTTPTYGDLNHLVSATMSGVTTC[160]LR	216	0	0	0	0	0	0	1	0	0	0	0	0	0	0	0	0	0	0	0
K	A0A498LBQ1	Tubulin beta chain	canonical	TLKLTTPTYGDLNHLVSATMSGVTTCLR	TLK[170]LTTPTYGDLN[115]HLVSATMSGVTTC[160]LR	216	0	0	1	0	0	0	1	0	0	0	7	0	0	0	0	0	0	0	4
K	A0A498LBQ1	Tubulin beta chain	canonical	TLKLTTPTYGDLNHLVSATMSGVTTCLR	n[15]TLK[170]LTTPTYGDLN[115]HLVSATMSGVTTC[160]LR	216	0	0	0	0	0	0	1	0	0	0	0	0	0	0	0	0	0	0	0
K	A0A498LBQ1	Tubulin beta chain	canonical	TLKLTTPTYGDLNHLVSATMSGVTTCLR	n[43]TLK[170]LTTPTYGDLN[115]HLVSATMSGVTTC[160]LR	214, 216	0	0	0	0	0	0	0	0	0	0	2	0	0	0	0	0	0	0	0
K	A0A498LBR0	Sex hormone-binding globulin-like protein	canonical	GCLEKILVQGQVIDLDR	GC[160]LEK[170]ILVQGQVIDLDR	260	0	0	0	0	0	0	0	0	0	0	0	0	0	0	0	0	0	0	2
K	A0A498LBS5	ATP synthase subunit mitochondrial-like protein	canonical	FAALTVPEPVDTQTTKIDAQEQDANK	FAALTVPEPVDTQTTK[170]IDAQEQDANK	124	0	0	0	0	0	0	0	0	0	0	0	0	0	0	0	0	0	0	2
K	A0A498LBS5	ATP synthase subunit mitochondrial-like protein	canonical	LASLPEKPAPIDWSYYR	LASLPEK[170]PAPIDWSYYR	83	0	0	0	0	0	0	0	0	1	0	0	0	0	0	0	0	0	0	1
K	A0A498LBS5	ATP synthase subunit mitochondrial-like protein	canonical	SDSIAAKLASLPEKPAPIDWSYYR	SDSIAAK[170]LASLPEKPAPIDWSYYR	76	0	0	0	0	0	0	0	0	0	0	0	0	0	0	0	2	0	0	0
K	A0A498LBS5	ATP synthase subunit mitochondrial-like protein	canonical	SVVAKAGMVDEFEKK	SVVAK[170]AGMVDEFEKK	98	0	0	0	0	0	0	0	0	0	0	0	0	0	0	0	0	0	0	1
K	A0A498LBU4	Formin 14	canonical	AIEEKAQNAGKVEGDAFR	n[43]AIEEK[170]AQNAGKVEGDAFR	326, 330	0	0	0	0	0	0	0	0	0	0	2	0	0	0	0	0	0	0	0
K	A0A498LBX2	Alpha-internexin-like protein	canonical	FADLSEQANK	FADLSEQANK[170]	291	0	0	0	0	0	0	0	0	0	0	0	0	0	0	0	0	0	0	1
K	A0A498LBX2	Alpha-internexin-like protein	canonical	FADLSEQANKSNEVIR	FADLSEQANK[170]SN[115]EVIR[170]	291	0	0	0	0	0	0	1	0	0	0	0	0	0	0	0	0	0	0	0
K	A0A498LBX2	Alpha-internexin-like protein	canonical	FADLSEQANKSNEVIR	FADLSEQAN[115]K[170]SNEVIR	291	0	0	3	0	0	0	0	0	0	0	0	0	0	0	0	0	0	0	0
K	A0A498LBX2	Alpha-internexin-like protein	canonical	NLEQHNKVLETELVTLR	n[43]NLEQHN[115]K[170]VLETELVTLR	108, 114	0	0	0	0	0	0	0	0	0	0	2	0	0	0	0	0	0	0	0
K	A0A498LBX2	Alpha-internexin-like protein	canonical	NLQSAEEWYK	n[43]NLQSAEEWYK[170]	270, 279	0	0	0	0	0	0	0	0	0	0	0	4	0	0	0	0	0	0	0
K	A0A498LBX2	Alpha-internexin-like protein	canonical	QLQSKTIEIESLKGTNESLER	Q[111]LQSK[170]TIEIESLKGTNESLER	313	0	0	1	0	0	0	0	0	0	0	0	0	0	0	0	0	0	0	0
K	A0A498LBX2	Alpha-internexin-like protein	canonical	QLQSKTIEIESLKGTNESLER	n[43]QLQSK[170]TIEIESLKGTNESLER	309, 313	0	0	6	0	0	0	0	0	0	0	0	0	0	0	0	0	0	0	0
K	A0A498LBX2	Alpha-internexin-like protein	canonical	TIEIESLKGTNESLER	TIEIESLK[170]GTNESLER	321	0	0	1	0	0	0	0	0	0	0	0	0	0	0	0	0	0	0	0
K	A0A498LBY4	Histone H2A	subsumed	HLQLAVRNDEELNKLLGGVTIAQGGVLPNIQAVLLPK	HLQLAVRNDEELNK[170]LLGGVTIAQGGVLPNIQAVLLPK	79	0	0	2	0	0	0	0	0	0	0	0	0	0	0	0	0	0	0	0
K	A0A498LBY4	Histone H2A	subsumed	HLQLAVRNDEELNKLLGGVTIAQGGVLPNIQAVLLPK	HLQLAVRNDEELN[115]K[170]LLGGVTIAQGGVLPNIQAVLLPK	79	0	0	0	0	0	0	0	0	0	0	0	0	0	0	0	0	0	0	1
K	A0A498LBY4	Histone H2A	subsumed	HLQLAVRNDEELNKLLGGVTIAQGGVLPNIQAVLLPK	HLQLAVRN[115]DEELNK[170]LLGGVTIAQGGVLPNIQAVLLPK	79	0	0	0	0	0	0	0	0	0	0	0	0	0	0	0	2	0	0	0
K	A0A498LBY4	Histone H2A	subsumed	HLQLAVRNDEELNKLLGGVTIAQGGVLPNIQAVLLPK	HLQLAVRN[115]DEELN[115]K[170]LLGGVTIAQGGVLPNIQAVLLPK	79	0	0	0	0	0	0	0	0	0	0	0	0	0	0	0	0	0	0	2
K	A0A498LBY4	Histone H2A	subsumed	NDEELNKLLGGVTIAQGGVLPNIQAVLLPK	NDEELNK[170]LLGGVTIAQGGVLPNIQAVLLPK	79	0	0	0	0	0	0	0	0	0	0	0	0	0	1	0	0	1	0	0
K	A0A498LBY4	Histone H2A	subsumed	NDEELNKLLGGVTIAQGGVLPNIQAVLLPK	NDEELN[115]K[170]LLGGVTIAQGGVLPNIQAVLLPK	79	0	0	1	0	0	0	0	0	0	0	0	0	0	1	0	0	0	0	2
K	A0A498LBY4	Histone H2A	subsumed	NDEELNKLLGGVTIAQGGVLPNIQAVLLPK	N[115]DEELN[115]K[170]LLGGVTIAQGGVLPNIQAVLLPK	79	0	0	0	0	0	0	0	0	0	0	0	0	0	0	0	0	0	0	1
K	A0A498LBY4	Histone H2A	subsumed	NDEELNKLLGGVTIAQGGVLPNIQAVLLPKK	NDEELNKLLGGVTIAQGGVLPN[115]IQAVLLPK[170]K	102	0	0	0	0	0	0	0	0	0	0	0	0	0	0	0	0	0	0	1
K	A0A498LBY4	Histone H2A	subsumed	VTIAQGGVLPNIQAVLLPKK	VTIAQGGVLPNIQAVLLPK[170]K	102	0	0	0	1	0	0	0	0	0	0	0	0	0	0	0	0	0	0	0
K	A0A498LBY9	Medium-chain specific acyl-mitochondrial	canonical	ASASKAFTGFIVEADTPGVQPGRK	ASASK[170]AFTGFIVEADTPGVQPGRK	219	0	0	0	0	0	0	0	0	0	0	0	0	0	1	0	3	0	0	0
K	A0A498LBY9	Medium-chain specific acyl-mitochondrial	canonical	AVKKGDEYIVSGQK	AVK[170]KGDEYIVSGQK	180	0	0	0	0	0	0	0	0	0	0	0	0	0	0	0	1	0	0	0
K	A0A498LC17	Cystathionine beta-synthase-like protein	canonical	HFSPDELSVKVTDDYVEIQGK	HFSPDELSVK[170]VTDDYVEIQGK	707	0	0	7	0	0	0	0	0	0	0	0	0	0	0	0	0	0	0	0
K	A0A498LC17	Cystathionine beta-synthase-like protein	canonical	LPSNVDQSAITCTLSADGLLTLCGPKTGGIEASR	LPSNVDQSAITC[160]TLSADGLLTLC[160]GPK[170]TGGIEASR	764	0	0	1	0	0	0	0	0	0	0	0	0	0	0	0	0	0	0	0
K	A0A498LC17	Cystathionine beta-synthase-like protein	canonical	LPSNVDQSAITCTLSADGLLTLCGPKTGGIEASRGDR	LPSNVDQSAITC[160]TLSADGLLTLC[160]GPK[170]TGGIEASRGDR	764	0	0	2	0	0	0	0	0	0	0	0	0	0	0	0	0	0	0	0
K	A0A498LC17	Cystathionine beta-synthase-like protein	canonical	YRLPSNVDQSAITCTLSADGLLTLCGPKTGGIEASR	YRLPSNVDQSAITC[160]TLSADGLLTLC[160]GPK[170]TGGIEASR	764	0	0	3	0	0	0	0	0	0	0	0	0	0	0	0	0	0	0	0
K	A0A498LC85	F-box only 22-like protein	canonical	AELNESKCSELEEELK	AELNESK[170]C[160]SELEEELK	165	0	0	0	0	0	0	0	0	0	0	0	0	0	0	0	0	0	0	1
K	A0A498LC85	F-box only 22-like protein	canonical	AELNESKCSELEEELKTVTNNMK	AELNESKC[160]SELEEELK[170]TVTN[115]NMK	174	0	0	0	0	1	0	0	0	0	0	0	0	0	0	0	0	0	0	0
K	A0A498LC85	F-box only 22-like protein	canonical	ALKDEEKMELQEIQLK	ALKDEEK[170]MELQEIQLK	116	0	0	0	0	1	0	0	0	0	0	0	0	0	0	0	0	0	0	6
K	A0A498LC85	F-box only 22-like protein	canonical	ALKDEEKMELQEIQLK	ALKDEEK[170]M[147]ELQEIQLK	116	0	0	0	0	3	0	0	0	0	0	0	0	0	0	0	0	0	0	0
K	A0A498LC85	F-box only 22-like protein	canonical	ALKDEEKMELQEIQLK	ALK[170]DEEKMELQEIQLK	112	0	0	1	0	0	0	0	0	0	0	0	0	0	0	0	0	0	0	1
K	A0A498LC85	F-box only 22-like protein	canonical	ALKDEEKMELQEIQLK	ALK[170]DEEKM[147]ELQEIQLK	112	0	0	0	0	1	0	0	0	0	0	0	0	0	0	0	0	0	0	0
K	A0A498LC85	F-box only 22-like protein	canonical	ALKDEEKMELQEIQLK	n[43]ALKDEEK[170]MELQEIQLK	110, 116	0	0	2	0	0	0	0	0	0	0	0	0	0	0	0	0	0	0	0
K	A0A498LC85	F-box only 22-like protein	canonical	ALKDEEKMELQEIQLK	n[43]ALK[170]DEEKMELQEIQLK	110, 112	0	0	0	0	2	0	0	0	0	0	0	0	0	0	0	0	0	0	6
K	A0A498LC85	F-box only 22-like protein	canonical	CSELEEELKTVTNNMK	C[143]SELEEELK[170]TVTNNMK	174	1	0	0	0	0	0	0	0	0	0	0	0	0	0	0	0	0	0	0
K	A0A498LC85	F-box only 22-like protein	canonical	CSELEEELKTVTNNMK	C[160]SELEEELKTVTN[115]NMK[170]	181	0	0	0	0	2	0	0	0	0	0	0	0	0	0	0	0	0	0	0
K	A0A498LC85	F-box only 22-like protein	canonical	CSELEEELKTVTNNMK	C[160]SELEEELK[170]TVTNNMK	174	0	0	0	0	1	0	0	0	0	0	0	0	0	0	0	0	0	0	0
K	A0A498LC85	F-box only 22-like protein	canonical	CSELEEELKTVTNNMK	C[160]SELEEELK[170]TVTN[115]NMK	174	0	0	0	0	1	0	0	0	0	0	0	0	0	0	0	0	0	0	0
K	A0A498LC85	F-box only 22-like protein	canonical	EAKHIAEEADR	EAK[170]HIAEEADR	128	0	0	0	0	0	0	0	0	0	0	0	0	0	0	0	0	0	0	7
K	A0A498LC85	F-box only 22-like protein	canonical	HIAEEADRKYEEVAR	HIAEEADRK[170]YEEVAR	137	0	0	0	0	0	0	0	0	0	0	0	0	0	0	0	0	0	0	2
K	A0A498LC85	F-box only 22-like protein	canonical	KATDAEGDVASLNR	n[43]K[170]ATDAEGDVASLNR	53	0	0	0	0	0	0	0	0	0	0	0	0	0	0	0	10	0	0	0
K	A0A498LC85	F-box only 22-like protein	canonical	LATALQKLEEAEKAADESER	LATALQKLEEAEK[170]AADESER	94	0	0	0	0	0	0	0	0	0	0	0	0	0	0	0	0	0	0	7
K	A0A498LC85	F-box only 22-like protein	canonical	LATALQKLEEAEKAADESER	LATALQK[170]LEEAEKAADESER	88	4	0	0	0	0	0	0	0	0	1	0	0	0	0	0	0	0	0	9
K	A0A498LC85	F-box only 22-like protein	canonical	LATALQKLEEAEKAADESER	n[15]LATALQK[170]LEEAEKAADESER	88	2	0	0	0	0	0	0	0	0	0	0	0	0	0	0	0	0	0	0
K	A0A498LC85	F-box only 22-like protein	canonical	LATALQKLEEAEKAADESER	n[43]LATALQK[170]LEEAEKAADESER	82, 88	0	0	0	0	0	0	0	0	0	2	0	0	0	0	0	0	0	0	2
K	A0A498LC85	F-box only 22-like protein	canonical	LEEAEKAADESER	LEEAEK[170]AADESER	94	0	0	0	0	0	0	0	0	0	0	0	0	0	0	0	0	0	0	5
K	A0A498LC85	F-box only 22-like protein	canonical	LEKTIDDLEDELYAQK	LEK[170]TIDDLEDELYAQK	227	2	0	0	0	1	0	0	0	0	0	0	0	0	0	0	0	0	0	0
K	A0A498LC85	F-box only 22-like protein	canonical	TEERAELNESKCSELEEELK	TEERAELNESK[170]C[160]SELEEELK	165	0	0	0	0	0	0	0	0	0	0	0	0	0	0	0	0	0	0	1
K	A0A498LCF5	Histone H3-like protein	subsumed	EIAQDFKTDLR	EIAQDFK[170]TDLR	32	0	0	0	0	0	0	0	0	0	2	0	0	0	0	0	0	2	0	2
K	A0A498LCF5	Histone H3-like protein	subsumed	FQSSAVMALQESSEAYLVGLFEDTNLCAIHAKR	FQSSAVMALQESSEAYLVGLFEDTN[115]LC[160]AIHAK[170]R	68	0	0	0	0	0	0	0	0	0	0	0	0	0	0	0	0	0	0	3
K	A0A498LCF5	Histone H3-like protein	subsumed	FQSSAVMALQESSEAYLVGLFEDTNLCAIHAKR	FQSSAVMALQESSEAYLVGLFEDTN[115]LC[160]AIHAK[170]R[170]	68	0	0	0	0	0	0	0	0	0	0	0	0	0	0	0	0	0	0	1
K	A0A498LCF5	Histone H3-like protein	subsumed	RVTIMPKDIQLAR	RVTIMPK[170]DIQLAR	75	0	0	0	0	0	0	0	0	0	0	1	0	0	0	0	0	0	0	0
K	A0A498LCF5	Histone H3-like protein	subsumed	VTIMPKDIQLAR	VTIMPK[170]DIQLAR	75	0	0	0	0	0	0	0	0	0	0	0	0	0	0	0	0	0	0	1
K	A0A498LCF5	Histone H3-like protein	subsumed	YQKSTELLIR	YQK[170]STELLIR	9	0	0	0	0	0	0	0	0	0	1	1	0	0	0	0	0	2	0	1
K	A0A498LCG9	Lipoma-preferred partner-like protein	indistinguishable representative	AEPSHHAAPPPSQGYQPAPPKK	AEPSHHAAPPPSQGYQPAPPK[170]K	309	0	0	0	0	0	0	0	0	0	0	0	0	0	0	0	0	0	0	1
K	A0A498LCG9	Lipoma-preferred partner-like protein	indistinguishable representative	ATGKAYHPQCFTCVVCHR	ATGK[170]AYHPQC[160]FTC[160]VVC[160]HR	439	0	0	0	0	0	0	0	0	0	0	0	0	0	0	0	0	0	0	1
K	A0A498LCG9	Lipoma-preferred partner-like protein	indistinguishable representative	ATGKAYHPQCFTCVVCHR	n[43]ATGK[170]AYHPQC[160]FTC[160]VVC[160]HR	436, 439	0	0	0	0	0	0	0	0	0	0	0	0	0	0	0	0	0	0	2
K	A0A498LCI0	Gamma-crystallin M2-like protein	marginally distinguished	VHSGCWMMYDQSNYMGNQYFFKR	VHSGC[160]WMMYDQSNYMGN[115]QYFFK[170]R	58	0	0	2	0	0	0	0	0	0	0	0	0	0	0	0	0	0	0	0
K	A0A498LCI4	Vigilin isoform X2	canonical	EAPWATGNEKAPDMSSSEEFPSFGAPVTNAR	EAPW[202]ATGNEK[170]APDM[147]SSSE[111]EFPSFGAPVTNAR	1166	0	0	0	0	0	0	0	0	0	0	0	0	0	0	0	1	0	0	0
K	A0A498LCJ7	Histone H4	subsumed	DNIQGITKPAIR	DNIQGITK[170]PAIR	32	0	0	0	3	0	0	2	1	0	2	1	1	0	0	0	0	0	0	3
K	A0A498LCJ7	Histone H4	subsumed	DNIQGITKPAIR	DNIQGITK[170]PAIR[170]	32	0	2	0	0	0	0	0	0	0	0	0	0	0	0	0	0	0	0	0
K	A0A498LCJ7	Histone H4	subsumed	DNIQGITKPAIRR	DNIQGITK[170]PAIRR	32	0	0	0	0	0	0	0	0	0	1	0	0	0	0	0	0	0	0	0
K	A0A498LCS7	MHC class I antigen	subsumed	GYLEKECVDWLKK	n[43]GYLEK[170]EC[160]VDWLKK	137, 141	0	0	0	0	0	0	0	0	0	0	0	0	0	0	0	0	0	0	2
K	A0A498LCT0	Sterile alpha motif domain-containing 3-like isoform X1	subsumed	GYLEKECVDWLKK	n[43]GYLEK[170]EC[160]VDWLKK	108, 112	0	0	0	0	0	0	0	0	0	0	0	0	0	0	0	0	0	0	2
K	A0A498LCV7	Glutamine gamma-glutamyltransferase	canonical	THIIIPLVDELQDDCWEAK	THIIIPLVDELQDDC[160]W[202]EAK[170]	250	0	0	0	0	0	0	1	0	0	0	0	0	0	0	0	0	0	0	0
K	A0A498LCV7	Glutamine gamma-glutamyltransferase	canonical	THIIIPLVDELQDDCWEAKIVGQNVNQIR	THIIIPLVDELQDDC[160]WEAK[170]IVGQNVNQIR	250	0	0	0	0	0	0	1	0	0	0	0	0	0	0	0	0	0	0	0
K	A0A498LD02	40S ribosomal S10	canonical	SAAQPGADKKAEAGAGAATEFQFR	SAAQPGADK[170]KAEAGAGAATEFQFR	158	0	0	0	0	0	0	0	0	0	0	0	0	0	0	0	3	0	0	2
K	A0A498LD61	Sulfotransferase (EC 2.8.2.-)	canonical	AGSDLYLVYHGLLLPKATHSEESLK	n[43]AGSDLYLVYHGLLLPK[170]ATHSEESLK	2, 17	0	0	0	0	0	0	0	0	0	0	0	0	0	0	0	2	0	0	0
K	A0A498LD72	LEG1-like protein	canonical	LDTVDGVIQVKPWDYLQR	LDTVDGVIQVK[170]PWDYLQR	51	0	0	0	0	0	0	0	0	0	0	0	0	0	0	0	0	0	0	1
K	A0A498LD72	LEG1-like protein	canonical	LDTVDGVIQVKPWDYLQR	n[43]LDTVDGVIQVK[170]PWDYLQR	41, 51	0	0	0	0	0	0	0	0	0	0	0	0	0	0	0	0	0	0	2
K	A0A498LD75	High mobility group B2-like protein	canonical	KDPNAPKRPPSAFFVFCSDHRPK	KDPNAPK[170]RPPSAFFVFC[160]SDHRPK	224	0	0	0	0	0	0	0	0	0	0	0	0	0	0	0	0	0	0	1
K	A0A498LD75	High mobility group B2-like protein	canonical	KKNPGTSVNFSEFSK	KK[170]N[115]PGTSVNFSEFSK	157	0	0	0	0	0	0	0	0	0	0	0	0	0	0	0	0	0	0	1
K	A0A498LD75	High mobility group B2-like protein	canonical	VKNDNPGISIGDIAK	n[15]VK[170]N[115]DNPGISIGDIAK	242	0	0	0	0	0	0	0	0	0	0	0	0	0	0	0	0	1	0	0
K	A0A498LDA5	Type II cytoskeletal 8	canonical	FLEQQNKMLETK	FLEQQN[115]K[170]M[147]LETK	71	0	0	2	0	0	0	0	0	0	0	0	0	0	0	0	0	0	0	0
K	A0A498LDA5	Type II cytoskeletal 8	canonical	FLEQQNKMLETK	n[43]FLEQQNK[170]MLETK	65, 71	0	0	0	0	0	0	0	0	0	0	0	0	0	0	0	0	0	0	2
K	A0A498LDA5	Type II cytoskeletal 8	canonical	KYEDEINKR	KYEDEIN[115]K[170]R[170]	139	0	1	0	0	0	2	0	0	1	0	0	0	0	0	0	0	0	0	0
K	A0A498LDA5	Type II cytoskeletal 8	canonical	KYEDEINKR	n[15]K[170]YEDEINKR	132	0	0	1	0	0	0	0	0	0	0	0	0	0	0	0	0	0	0	0
K	A0A498LDC6	Disulfide-isomerase A6	canonical	FALLKGSFSETGIHEFLR	FALLK[170]GSFSETGIHEFLR	31	0	0	0	0	0	0	0	0	0	0	0	0	0	0	0	2	0	0	0
K	A0A498LDC6	Disulfide-isomerase A6	canonical	INTVEPWDGKDGVLPMEDDIDLSDVDLDELEKDEL	INTVEPW[202]DGK[170]DGVLPMEDDIDLSDVDLDELEKDEL	73	0	0	0	0	0	0	0	0	0	0	0	0	0	0	0	1	0	0	0
K	A0A498LDE7	Histone H2A	indistinguishable representative	HLQLAVRNDEELNKLLGGVTIAQGGVLPNIQAVLLPK	HLQLAVRNDEELNK[170]LLGGVTIAQGGVLPNIQAVLLPK	96	0	0	2	0	0	0	0	0	0	0	0	0	0	0	0	0	0	0	0
K	A0A498LDE7	Histone H2A	indistinguishable representative	HLQLAVRNDEELNKLLGGVTIAQGGVLPNIQAVLLPK	HLQLAVRNDEELN[115]K[170]LLGGVTIAQGGVLPNIQAVLLPK	96	0	0	0	0	0	0	0	0	0	0	0	0	0	0	0	0	0	0	1
K	A0A498LDE7	Histone H2A	indistinguishable representative	HLQLAVRNDEELNKLLGGVTIAQGGVLPNIQAVLLPK	HLQLAVRN[115]DEELNK[170]LLGGVTIAQGGVLPNIQAVLLPK	96	0	0	0	0	0	0	0	0	0	0	0	0	0	0	0	2	0	0	0
K	A0A498LDE7	Histone H2A	indistinguishable representative	HLQLAVRNDEELNKLLGGVTIAQGGVLPNIQAVLLPK	HLQLAVRN[115]DEELN[115]K[170]LLGGVTIAQGGVLPNIQAVLLPK	96	0	0	0	0	0	0	0	0	0	0	0	0	0	0	0	0	0	0	2
K	A0A498LDE7	Histone H2A	indistinguishable representative	NDEELNKLLGGVTIAQGGVLPNIQAVLLPK	NDEELNK[170]LLGGVTIAQGGVLPNIQAVLLPK	96	0	0	0	0	0	0	0	0	0	0	0	0	0	1	0	0	1	0	0
K	A0A498LDE7	Histone H2A	indistinguishable representative	NDEELNKLLGGVTIAQGGVLPNIQAVLLPK	NDEELN[115]K[170]LLGGVTIAQGGVLPNIQAVLLPK	96	0	0	1	0	0	0	0	0	0	0	0	0	0	1	0	0	0	0	2
K	A0A498LDE7	Histone H2A	indistinguishable representative	NDEELNKLLGGVTIAQGGVLPNIQAVLLPK	N[115]DEELN[115]K[170]LLGGVTIAQGGVLPNIQAVLLPK	96	0	0	0	0	0	0	0	0	0	0	0	0	0	0	0	0	0	0	1
K	A0A498LDE7	Histone H2A	indistinguishable representative	NDEELNKLLGGVTIAQGGVLPNIQAVLLPKK	NDEELNKLLGGVTIAQGGVLPN[115]IQAVLLPK[170]K	119	0	0	0	0	0	0	0	0	0	0	0	0	0	0	0	0	0	0	1
K	A0A498LDE7	Histone H2A	indistinguishable representative	VTIAQGGVLPNIQAVLLPKK	VTIAQGGVLPNIQAVLLPK[170]K	119	0	0	0	1	0	0	0	0	0	0	0	0	0	0	0	0	0	0	0
K	A0A498LDE8	Disulfide-isomerase A6-like protein	canonical	DRLGGKTGGSDHGR	DRLGGK[170]TGGSDHGR	142	0	0	0	0	0	0	0	0	0	0	0	0	0	0	0	1	0	0	0
K	A0A498LDE8	Disulfide-isomerase A6-like protein	canonical	GIVKVGAVDADQHNSLGGQYGVR	GIVK[170]VGAVDADQHNSLGGQYGVR	77	0	0	0	0	0	0	0	0	0	0	0	0	0	0	0	2	0	0	0
K	A0A498LDE8	Disulfide-isomerase A6-like protein	canonical	IFGANKNKPEDYQGGR	IFGAN[115]K[170]NKPEDYQGGR	108	0	0	0	0	0	0	0	0	0	0	0	0	0	0	0	1	0	0	0
K	A0A498LDE8	Disulfide-isomerase A6-like protein	canonical	IFGANKNKPEDYQGGR	n[43]IFGANK[170]NKPEDYQGGR	103, 108	0	0	0	0	0	0	0	0	0	0	0	0	0	0	0	2	0	0	0
K	A0A498LDE8	Disulfide-isomerase A6-like protein	canonical	NLEPEWTAAATEIKDQTK	n[43]NLEPEWTAAATEIK[170]DQTK	197, 210	0	0	0	0	0	0	0	0	0	0	0	0	0	0	0	2	0	0	0
K	A0A498LDF4	Histone H1-like protein	indistinguishable	ALAAGGYDVEKNNSR	ALAAGGYDVEK[170]NN[115]SR[170]	67	0	0	0	0	0	0	0	0	1	0	0	0	0	0	0	0	0	0	0
K	A0A498LDF4	Histone H1-like protein	indistinguishable	ALAAGGYDVEKNNSR	ALAAGGYDVEK[170]N[115]NSR	67	0	0	0	0	0	0	0	0	0	0	0	0	0	0	0	0	1	0	5
K	A0A498LDF4	Histone H1-like protein	indistinguishable	ALAAGGYDVEKNNSR	ALAAGGYDVEK[170]N[115]NSR[170]	67	0	0	0	0	0	0	0	0	3	3	2	7	0	0	0	0	9	0	0
K	A0A498LDF4	Histone H1-like protein	indistinguishable	GTLVQVKGTGASGSFK	n[43]GTLVQVK[170]GTGASGSFK	83, 89	0	0	0	0	0	0	0	0	0	0	0	0	0	0	0	0	2	0	2
K	A0A498LDF4	Histone H1-like protein	indistinguishable	KAGPGVGDLIVKAVSASK	KAGPGVGDLIVK[170]AVSASK	38	0	0	0	0	0	0	0	0	0	0	0	0	0	0	0	0	1	0	0
K	A0A498LDF4	Histone H1-like protein	indistinguishable	KALAAGGYDVEKNNSR	KALAAGGYDVEK[170]NNSR	67	0	0	0	0	0	0	0	0	0	0	0	0	0	0	0	0	2	0	0
K	A0A498LDF4	Histone H1-like protein	indistinguishable	KALAAGGYDVEKNNSR	KALAAGGYDVEK[170]N[115]NSR	67	0	0	0	0	0	0	0	0	0	0	0	0	0	0	0	0	3	0	0
K	A0A498LDF4	Histone H1-like protein	indistinguishable	KALAAGGYDVEKNNSR	KALAAGGYDVEK[170]N[115]NSR[170]	67	0	0	0	0	0	0	0	0	0	0	0	0	0	0	0	0	1	0	0
K	A0A498LDF4	Histone H1-like protein	indistinguishable	KALAAGGYDVEKNNSR	n[15]K[170]ALAAGGYDVEKNNSR	56	0	0	0	0	0	0	0	0	0	0	0	0	0	0	0	0	1	0	0
K	A0A498LDF4	Histone H1-like protein	indistinguishable	SGVSLAALKK	SGVSLAALK[170]K	55	0	0	0	0	0	0	0	0	0	0	0	0	0	0	0	0	1	0	0
K	A0A498LDI3	Guanine nucleotide-binding G(T) subunit alpha-1	canonical	KLMHLADTIEEGTMPK	KLMHLADTIEEGTM[147]PK[170]	117	0	0	1	0	0	0	0	0	0	0	0	0	0	0	0	0	0	0	0
K	A0A498LDI3	Guanine nucleotide-binding G(T) subunit alpha-1	canonical	LVKPGYVPTEQDVLR	LVK[170]PGYVPTEQDVLR	160	0	0	3	0	0	0	0	0	0	0	0	0	0	1	0	0	0	0	0
K	A0A498LDI9	Putative ATP-dependent RNA helicase DDX6	subsumed	AKNGTGKSGAYLIPLLER	AKNGTGK[170]SGAYLIPLLER	141	0	0	0	0	0	0	0	0	0	0	0	0	0	3	0	0	0	0	0
K	A0A498LDI9	Putative ATP-dependent RNA helicase DDX6	subsumed	APSQLGPQTVSAQPGKEPMGIQKPANASQEGPSIR	APSQLGPQTVSAQPGK[170]EPMGIQKPANASQEGPSIR	43	0	0	0	0	0	0	0	0	0	0	0	0	0	0	0	0	0	1	0
K	A0A498LDI9	Putative ATP-dependent RNA helicase DDX6	subsumed	APSQLGPQTVSAQPGKEPMGIQKPANASQEGPSIR	APSQLGPQTVSAQPGK[170]EPMGIQK[142]PANASQEGPSIR	43	0	0	0	0	0	0	0	0	0	0	0	0	0	1	0	0	0	0	0
K	A0A498LDI9	Putative ATP-dependent RNA helicase DDX6	subsumed	APSQLGPQTVSAQPGKEPMGIQKPANASQEGPSIR	APSQLGPQTVSAQPGK[170]EPMGIQK[142]PAN[115]ASQEGPSIR	43	0	0	0	0	0	0	0	0	0	0	0	0	0	2	0	0	0	1	0
K	A0A498LDI9	Putative ATP-dependent RNA helicase DDX6	subsumed	ELLMGIFEMGWEKPSPIQEESIPIALSGR	ELLM[147]GIFE[111]M[147]GWEK[170]PSPIQEESIPIALSGR	113	0	0	0	0	0	0	0	0	0	0	0	0	0	0	0	0	0	1	0
K	A0A498LDI9	Putative ATP-dependent RNA helicase DDX6	subsumed	GNEFEDYCLKR	GNEFEDYC[160]LK[170]R	99	0	0	0	0	0	0	0	0	0	0	0	0	0	1	0	0	0	0	0
K	A0A498LDI9	Putative ATP-dependent RNA helicase DDX6	subsumed	NGTGKSGAYLIPLLER	N[115]GTGK[170]SGAYLIPLLER	141	0	0	0	0	0	0	0	0	0	0	0	0	0	3	0	0	0	0	0
K	A0A498LDI9	Putative ATP-dependent RNA helicase DDX6	subsumed	TSDVTATKGNEFEDYCLKR	TSDVTATKGNEFEDYC[160]LK[170]R	99	0	0	0	0	0	0	0	0	0	0	0	0	0	1	0	0	0	0	0
K	A0A498LDI9	Putative ATP-dependent RNA helicase DDX6	subsumed	TSDVTATKGNEFEDYCLKR	TSDVTATK[170]GN[115]EFEDYC[160]LKR	89	0	0	0	0	0	0	0	0	0	0	0	0	0	1	0	0	0	0	0
K	A0A498LDJ8	Actin-related protein 2/3 complex subunit 5	canonical	DRAEGLVLKVLSSFK	DRAEGLVLK[170]VLSSFK	88	0	0	0	0	0	0	0	0	0	0	0	0	0	0	0	0	0	0	2
K	A0A498LDL0	Histone H3	subsumed	EIAQDFKTDLR	EIAQDFK[170]TDLR	80	0	0	0	0	0	0	0	0	0	2	0	0	0	0	0	0	2	0	2
K	A0A498LDL0	Histone H3	subsumed	KSAPATGGVK	n[15]KSAPATGGVK[170]	37	0	0	0	0	0	0	0	0	0	0	0	0	0	0	0	0	0	0	1
K	A0A498LDL0	Histone H3	subsumed	KSAPATGGVK	n[15]K[170]SAPATGGVK	28	0	0	0	0	0	0	0	0	0	0	0	0	0	0	0	1	2	0	3
K	A0A498LDL0	Histone H3	subsumed	KSAPATGGVKKPHR	n[15]K[170]SAPATGGVK[142]KPHR	28	0	0	0	0	0	0	0	0	0	0	0	0	0	0	0	0	0	0	2
K	A0A498LDL0	Histone H3	subsumed	KSAPATGGVKKPHR	n[43]K[170]SAPATGGVK[142]KPHR	28	0	0	0	0	0	0	0	0	0	0	0	0	0	0	0	0	0	0	2
K	A0A498LDL0	Histone H3	subsumed	KSTGGKAPR	n[43]KSTGGK[170]APR	10, 15	0	0	0	0	0	0	0	0	0	0	0	0	0	0	0	8	8	0	10
K	A0A498LDL0	Histone H3	subsumed	QLATKAAR	QLATK[170]AAR	24	0	0	0	1	0	0	0	0	0	0	0	0	0	0	0	7	5	0	5
K	A0A498LDL0	Histone H3	subsumed	YQKSTELLIR	YQK[170]STELLIR	57	0	0	0	0	0	0	0	0	0	1	1	0	0	0	0	0	2	0	1
K	A0A498LDW5	Gamma-adducin isoform X1	canonical	THGVAQAGVNMGSQHK	THGVAQAGVN[115]MGSQHK[170]	360	0	0	0	0	0	0	1	0	0	0	0	0	0	0	0	0	0	0	0
K	A0A498LDZ5	GTP-binding SAR1b	canonical	LAESKTELDALMTDETIGNVPILILGNKIDKPEAVSEER	LAESK[170]TELDALM[147]TDETIGNVPILILGNKIDKPEAVSEER	174	0	0	0	0	0	0	1	0	0	0	0	0	0	0	0	0	0	0	0
K	A0A498LDZ5	GTP-binding SAR1b	canonical	LAESKTELDALMTDETIGNVPILILGNKIDKPEAVSEER	LAESK[170]TELDALM[147]TDETIGN[115]VPILILGNKIDKPEAVSEER	174	0	0	0	0	0	0	1	0	0	0	0	0	0	0	0	0	0	0	0
K	A0A498LE46	Tropomyosin alpha-1 chain isoform X2	canonical	AMKDEEKMEIQEMQLK	AMKDEEK[170]MEIQEMQLK	140	0	0	0	0	0	0	0	0	0	0	0	0	0	0	0	0	0	0	1
K	A0A498LE46	Tropomyosin alpha-1 chain isoform X2	canonical	AMKDEEKMEIQEMQLK	n[43]AMK[170]DEEKMEIQEMQLK	134, 136	0	0	0	0	0	0	0	0	0	0	0	0	0	0	0	0	0	0	2
K	A0A498LE46	Tropomyosin alpha-1 chain isoform X2	canonical	EAKHIAEEADR	EAK[170]HIAEEADR	152	0	0	0	0	0	0	0	0	0	0	0	0	0	0	0	0	0	0	7
K	A0A498LE46	Tropomyosin alpha-1 chain isoform X2	canonical	HIAEEADRKYEEVAR	HIAEEADRK[170]YEEVAR	161	0	0	0	0	0	0	0	0	0	0	0	0	0	0	0	0	0	0	2
K	A0A498LE46	Tropomyosin alpha-1 chain isoform X2	canonical	LATALQKLEEAEKAADESER	LATALQKLEEAEK[170]AADESER	118	0	0	0	0	0	0	0	0	0	0	0	0	0	0	0	0	0	0	7
K	A0A498LE46	Tropomyosin alpha-1 chain isoform X2	canonical	LATALQKLEEAEKAADESER	LATALQK[170]LEEAEKAADESER	112	4	0	0	0	0	0	0	0	0	1	0	0	0	0	0	0	0	0	9
K	A0A498LE46	Tropomyosin alpha-1 chain isoform X2	canonical	LATALQKLEEAEKAADESER	n[15]LATALQK[170]LEEAEKAADESER	112	2	0	0	0	0	0	0	0	0	0	0	0	0	0	0	0	0	0	0
K	A0A498LE46	Tropomyosin alpha-1 chain isoform X2	canonical	LATALQKLEEAEKAADESER	n[43]LATALQK[170]LEEAEKAADESER	106, 112	0	0	0	0	0	0	0	0	0	2	0	0	0	0	0	0	0	0	2
K	A0A498LE46	Tropomyosin alpha-1 chain isoform X2	canonical	LEEAEKAADESER	LEEAEK[170]AADESER	118	0	0	0	0	0	0	0	0	0	0	0	0	0	0	0	0	0	0	5
K	A0A498LE46	Tropomyosin alpha-1 chain isoform X2	canonical	YSEKEDKYEEEIK	YSEK[170]EDKYEEEIK	217	0	0	0	0	0	0	0	0	0	0	0	0	0	0	0	0	0	0	1
K	A0A498LE54	Myelin basic-like protein	canonical	FFGGDKK	FFGGDK[170]K	34	0	0	0	0	0	0	2	0	0	0	0	0	0	0	0	0	0	0	0
K	A0A498LE54	Myelin basic-like protein	canonical	IFKMGGSQSASSTK	IFK[170]M[147]GGSQSASSTK	72	0	0	0	0	0	0	1	0	0	0	0	0	0	0	0	0	0	0	0
K	A0A498LE54	Myelin basic-like protein	canonical	IFKMGGSQSASSTKR	IFK[170]MGGSQSASSTKR	72	0	0	0	0	0	0	6	0	0	0	0	0	0	0	0	0	0	0	0
K	A0A498LE54	Myelin basic-like protein	canonical	IFKMGGSQSASSTKR	IFK[170]M[147]GGSQSASSTKR	72	0	0	0	0	0	0	2	0	0	0	0	0	0	0	0	0	0	0	0
K	A0A498LE54	Myelin basic-like protein	canonical	IFKMGGSQSASSTKR	n[15]IFK[170]M[147]GGSQSASSTKR	72	0	0	0	0	0	0	4	0	0	0	0	0	0	0	0	0	0	0	0
K	A0A498LE54	Myelin basic-like protein	canonical	IFKMGGSQSASSTKR	n[43]IFK[170]MGGSQSASSTKR	70, 72	0	0	0	0	0	0	16	0	0	0	0	0	0	0	0	0	0	0	0
K	A0A498LE54	Myelin basic-like protein	canonical	SKKNPTVMDQIGK	n[15]SKK[170]N[115]PTVM[147]DQIGK	18	0	0	0	0	0	0	1	0	0	0	0	0	0	0	0	0	0	0	0
K	A0A498LE54	Myelin basic-like protein	canonical	SKKNPTVMDQIGK	n[15]SK[170]KN[115]PTVMDQIGK	17	0	0	0	0	0	0	1	0	0	0	0	0	0	0	0	0	0	0	0
K	A0A498LE54	Myelin basic-like protein	canonical	SKKNPTVMDQIGK	n[43]SK[142]K[170]N[115]PTVMDQIGK	16, 18	0	0	0	0	0	0	2	0	0	0	0	0	0	0	0	0	0	0	0
K	A0A498LE55	Myosin heavy fast skeletal muscle-like protein	indistinguishable representative	MQGSLEDQIIAANPLLEAYGNAKTVR	M[147]QGSLEDQIIAANPLLEAYGN[115]AK[170]TVR	236	0	0	1	0	0	0	0	0	0	0	0	0	0	0	0	0	0	0	0
K	A0A498LE63	Myosin-7-like protein	subsumed	ADIAESQVNKLR	ADIAESQVN[115]K[170]LR	156	0	0	3	0	0	0	0	0	0	0	0	0	0	0	0	0	0	0	0
K	A0A498LE63	Myosin-7-like protein	subsumed	LQDLVDKLQLKVK	LQDLVDKLQLK[170]VK	111	0	0	0	0	0	0	0	0	0	0	0	0	0	0	0	0	1	0	0
K	A0A498LE70	Type I cytoskeletal 50 kDa-like protein	marginally distinguished	DYSAYQATISDLQDKIQDATR	n[43]DYSAYQATISDLQDK[170]IQDATR	167, 181	0	0	0	0	0	0	0	0	0	0	0	0	0	0	0	0	0	0	2
K	A0A498LE70	Type I cytoskeletal 50 kDa-like protein	marginally distinguished	EQYEGVAAKNQR	EQYEGVAAK[170]N[115]QR	303	0	0	0	0	0	0	0	0	0	0	0	0	0	0	0	0	0	0	4
K	A0A498LE70	Type I cytoskeletal 50 kDa-like protein	marginally distinguished	IRQFLENKTSPAAR	IRQFLENK[170]TSPAAR	160	0	0	1	0	0	0	0	0	0	0	0	0	0	0	0	0	0	0	0
K	A0A498LE70	Type I cytoskeletal 50 kDa-like protein	marginally distinguished	KASLEGTLKDTEAQYSMQLTQLQVR	KASLEGTLK[170]DTEAQYSMQLTQLQVR	366	0	0	0	0	0	0	0	0	0	0	0	0	0	0	0	0	0	0	2
K	A0A498LE70	Type I cytoskeletal 50 kDa-like protein	marginally distinguished	KASLEGTLKDTEAQYSMQLTQLQVR	n[43]K[170]ASLEGTLKDTEAQYSMQLTQLQVR	358	0	0	0	0	0	0	0	0	0	0	0	0	0	0	0	0	0	0	4
K	A0A498LE70	Type I cytoskeletal 50 kDa-like protein	marginally distinguished	LAADDFKNKYENELALR	LAADDFK[170]N[115]K[170]YENELALR	207, 209	0	0	2	0	0	0	0	0	0	0	0	0	0	0	0	0	0	0	0
K	A0A498LE70	Type I cytoskeletal 50 kDa-like protein	marginally distinguished	SDLEMQIEGLKEELIFLKK	n[43]SDLEMQIEGLK[170]EELIFLKK	239, 249	0	0	0	0	0	0	0	0	0	0	0	0	0	0	0	0	0	0	2
K	A0A498LE70	Type I cytoskeletal 50 kDa-like protein	marginally distinguished	SETLTKEVVASTETLQVSK	SETLTK[170]EVVASTETLQVSK	321	0	0	0	0	0	0	0	0	0	0	0	0	0	0	0	0	0	0	2
K	A0A498LE70	Type I cytoskeletal 50 kDa-like protein	marginally distinguished	SLEKANADLELK	n[43]SLEK[170]ANADLELK	141, 144	0	0	0	0	0	0	0	0	0	0	0	0	0	0	0	0	0	0	2
K	A0A498LE70	Type I cytoskeletal 50 kDa-like protein	marginally distinguished	VMAEIREQYEGVAAKNQR	VM[147]AEIREQYEGVAAK[170]N[115]QR	303	0	0	2	0	0	0	0	0	0	0	0	0	0	0	0	0	0	0	0
K	A0A498LE70	Type I cytoskeletal 50 kDa-like protein	marginally distinguished	VNGGVYLAIDNAKLAADDFK	VN[115]GGVYLAIDNAK[170]LAADDFK	200	0	0	0	0	0	0	0	0	0	0	0	0	0	0	0	0	0	0	1
K	A0A498LE72	Myofibril-bound serine ase	marginally distinguished	DSCQGDSGGPVVCNGK	DSC[160]QGDSGGPVVC[160]NGK[170]	148	0	0	0	0	0	0	0	0	2	0	0	0	0	0	0	0	0	0	0
K	A0A498LE72	Myofibril-bound serine ase	marginally distinguished	DSCQGDSGGPVVCNGK	DSC[160]QGDSGGPVVC[160]N[115]GK[170]	148	0	0	0	0	0	0	0	0	3	0	0	0	0	0	0	0	0	0	0
K	A0A498LE76	Carbonic anhydrase-like protein	canonical	DPISVSPAQMAKFR	DPISVSPAQMAK[170]FR	242	0	0	0	0	0	0	0	0	0	0	0	0	0	0	0	0	0	0	1
K	A0A498LE76	Carbonic anhydrase-like protein	canonical	FPCELHLVHWNTKYPNFGEAASKPDGLAVVGVFLK	FPC[160]ELHLVHWNTK[170]YPN[115]FGEAASKPDGLAVVGVFLK	144	0	0	0	0	0	0	0	0	0	0	0	0	0	0	0	0	0	0	1
K	A0A498LE76	Carbonic anhydrase-like protein	canonical	LKYDPATAK	LK[170]YDPATAK	68	0	0	0	0	0	0	0	0	0	0	0	0	0	0	0	0	1	0	0
K	A0A498LE76	Carbonic anhydrase-like protein	canonical	LKYDPATAKGILNNGHSFQVDFVDDDNSSTLAGGPISGIYR	LKYDPATAK[170]GILN[115]NGHSFQVDFVDDDNSSTLAGGPISGIYR	75	0	0	0	0	0	0	0	0	0	0	0	0	0	0	0	0	1	0	1
K	A0A498LE76	Carbonic anhydrase-like protein	canonical	LKYDPATAKGILNNGHSFQVDFVDDDNSSTLAGGPISGIYR	LKYDPATAK[170]GILN[115]N[115]GHSFQVDFVDDDNSSTLAGGPISGIYR	75	0	0	0	0	0	0	0	0	0	0	0	0	0	0	0	0	0	0	2
K	A0A498LE76	Carbonic anhydrase-like protein	canonical	LKYDPATAKGILNNGHSFQVDFVDDDNSSTLAGGPISGIYR	LKYDPATAK[170]GILN[115]N[115]GHSFQVDFVDDDN[115]SSTLAGGPISGIYR	75	0	0	0	0	0	0	0	0	0	0	0	0	0	0	0	0	1	0	0
K	A0A498LE76	Carbonic anhydrase-like protein	canonical	LQKVLDALDDIR	LQK[170]VLDALDDIR	176	0	0	0	0	0	0	0	0	0	0	0	0	0	0	0	0	2	0	0
K	A0A498LE76	Carbonic anhydrase-like protein	canonical	LQKVLDALDDIR	n[43]LQK[170]VLDALDDIR	174, 176	0	0	0	0	0	0	0	0	0	0	0	0	0	0	0	0	8	0	4
K	A0A498LE76	Carbonic anhydrase-like protein	canonical	LQKVLDALDDIRSK	LQK[170]VLDALDDIRSK	176	0	0	1	0	0	0	0	0	0	0	0	0	0	0	0	0	1	0	2
K	A0A498LE76	Carbonic anhydrase-like protein	canonical	SLLFTSEGEAPCCMVDNYRPPQPLK	SLLFTSEGEAPC[160]C[160]MVDN[115]YRPPQPLK[170]	269	0	0	0	0	0	0	0	0	0	0	0	0	0	0	0	0	2	0	0
K	A0A498LE76	Carbonic anhydrase-like protein	canonical	SLLFTSEGEAPCCMVDNYRPPQPLK	SLLFTSEGEAPC[160]C[160]M[147]VDN[115]YR[170]PPQPLK[170]	269	0	0	0	0	0	0	0	0	0	0	0	0	0	0	0	0	1	0	0
K	A0A498LE76	Carbonic anhydrase-like protein	canonical	SLLFTSEGEAPCCMVDNYRPPQPLKGR	SLLFTSEGEAPC[160]C[160]MVDN[115]YRPPQPLK[170]GR	269	0	0	0	0	0	0	0	0	0	0	0	0	0	0	0	0	3	0	0
K	A0A498LE76	Carbonic anhydrase-like protein	canonical	YDPATAKGILNNGHSFQVDFVDDDNSSTLAGGPISGIYR	YDPATAK[170]GILN[115]N[115]GHSFQVDFVDDDNSSTLAGGPISGIYR	75	0	0	0	0	0	0	0	0	0	0	0	0	0	0	0	0	1	0	0
K	A0A498LE76	Carbonic anhydrase-like protein	canonical	YPNFGEAASKPDGLAVVGVFLK	YPNFGEAASK[170]PDGLAVVGVFLK	154	0	0	0	0	0	0	0	0	0	0	0	0	0	0	0	0	2	0	2
K	A0A498LE76	Carbonic anhydrase-like protein	canonical	YPNFGEAASKPDGLAVVGVFLKIGSANPR	YPNFGEAASKPDGLAVVGVFLK[170]IGSANPR	166	0	0	0	0	0	0	0	0	0	0	0	0	0	0	0	0	0	0	1
K	A0A498LE85	Calcium-transporting ATPase (EC 7.2.2.10)	canonical	EASDIILTDDNFTSIVK	EASDIILTDDN[115]FTSIVK[170]	823	0	0	0	0	0	0	0	0	0	0	1	0	0	0	0	0	0	0	0
K	A0A498LE94	Pleiotropic regulator 1	representative	TEEVQKHSVHTLVFR	n[43]TEEVQK[170]HSVHTLVFR	2, 7	0	0	0	0	0	0	0	0	0	2	0	0	0	0	0	0	0	0	0
K	A0A498LEA5	Myosin-7-like protein	subsumed	ADIAESQVNKLR	ADIAESQVN[115]K[170]LR	156	0	0	3	0	0	0	0	0	0	0	0	0	0	0	0	0	0	0	0
K	A0A498LEA5	Myosin-7-like protein	subsumed	LQDLVDKLQLKVK	LQDLVDKLQLK[170]VK	111	0	0	0	0	0	0	0	0	0	0	0	0	0	0	0	0	1	0	0
K	A0A498LEC3	Voltage-dependent anion-selective channel 1	marginally distinguished	DIFTKGYGFGLIK	n[43]DIFTK[170]GYGFGLIK	84, 88	0	0	0	0	0	0	0	0	0	0	2	0	0	0	0	0	0	0	0
K	A0A498LEC3	Voltage-dependent anion-selective channel 1	marginally distinguished	LTFDSSFSPNTGKK	LTFDSSFSPN[115]TGK[170]K	177	0	0	0	0	0	0	0	0	0	0	4	0	0	0	0	0	0	0	0
K	A0A498LEC5	Myosin heavy fast skeletal muscle-like protein	representative	TVNTKRVIQYFATVGAMSGPK	n[43]TVN[115]TK[170]RVIQYFATVGAMSGPK	185, 189	2	0	2	0	0	0	0	0	0	0	0	0	0	0	0	0	0	0	0
K	A0A498LED0	Myosin heavy fast skeletal muscle-like protein	representative	IEDMAMMTHLNEPCVLYNLKER	IEDMAMMTHLNEPC[160]VLYN[115]LK[170]ER	106	0	0	0	0	1	0	0	0	0	0	0	0	0	0	0	0	0	0	0
K	A0A498LED0	Myosin heavy fast skeletal muscle-like protein	representative	MQGSLEDQIIAANPLLEAYGNAKTVR	M[147]QGSLEDQIIAANPLLEAYGN[115]AK[170]TVR	236	0	0	1	0	0	0	0	0	0	0	0	0	0	0	0	0	0	0	0
K	A0A498LED3	Myosin heavy fast skeletal muscle-like protein	marginally distinguished	LQDLVDKLQLKVK	LQDLVDKLQLK[170]VK	127	0	0	0	0	0	0	0	0	0	0	0	0	0	0	0	0	1	0	0
K	A0A498LED3	Myosin heavy fast skeletal muscle-like protein	marginally distinguished	TLTVKEDDIHPMNPPKFDK	TLTVKEDDIHPMN[115]PPK[170]FDK	233	0	0	0	0	1	0	0	0	0	0	0	0	0	0	0	0	0	0	0
K	A0A498LED3	Myosin heavy fast skeletal muscle-like protein	marginally distinguished	TVNTKRVIQYFATVGAMSGPK	n[43]TVN[115]TK[170]RVIQYFATVGAMSGPK	335, 339	2	0	2	0	0	0	0	0	0	0	0	0	0	0	0	0	0	0	0
K	A0A498LED7	Histone H2B	subsumed	KESYAIYVYK	n[15]K[170]ESYAIYVYK	23	0	1	0	0	0	0	0	0	0	0	0	0	0	0	1	0	0	0	0
K	A0A498LED7	Histone H2B	subsumed	QVHPDTGISSKAMGIMNSFVNDIFER	QVHPDTGISSK[170]AMGIMNSFVNDIFER	46	0	0	0	0	0	0	0	0	0	0	0	0	0	0	0	0	0	0	1
K	A0A498LED7	Histone H2B	subsumed	QVHPDTGISSKAMGIMNSFVNDIFER	QVHPDTGISSK[170]AMGIMN[115]SFVNDIFER	46	0	0	0	0	0	0	0	0	0	0	0	0	0	0	0	0	1	0	0
K	A0A498LED7	Histone H2B	subsumed	QVHPDTGISSKAMGIMNSFVNDIFER	QVHPDTGISSK[170]AM[147]GIMNSFVNDIFER	46	0	0	0	0	0	0	0	0	0	0	0	0	0	0	0	1	0	0	0
K	A0A498LED7	Histone H2B	subsumed	QVHPDTGISSKAMGIMNSFVNDIFER	Q[111]VHPDTGISSK[170]AMGIMNSFVNDIFER	46	0	0	0	0	0	0	0	0	0	0	0	0	0	0	0	0	0	0	1
K	A0A498LED7	Histone H2B	subsumed	QVHPDTGISSKAMGIMNSFVNDIFER	Q[111]VHPDTGISSK[170]AM[147]GIMN[115]SFVNDIFER	46	0	0	0	0	0	0	0	0	0	0	0	0	0	0	0	0	0	0	1
K	A0A498LED7	Histone H2B	subsumed	VLKQVHPDTGISSK	VLK[170]QVHPDTGISSK	35	0	0	0	2	0	0	0	0	1	0	0	3	0	2	0	0	6	0	4
K	A0A498LED7	Histone H2B	subsumed	VLKQVHPDTGISSK	n[43]VLK[170]QVHPDTGISSK	33, 35	0	0	2	0	0	0	0	0	0	4	2	0	0	0	0	2	8	0	8
K	A0A498LEG1	Thioredoxin-dependent peroxide mitochondrial	marginally distinguished	LVKAFQFVETHGEVCPASWTPK	LVK[170]AFQFVETHGEVC[160]PASWTPK	212	0	0	0	0	0	0	0	0	0	0	1	0	0	0	0	0	0	0	0
K	A0A498LEG1	Thioredoxin-dependent peroxide mitochondrial	marginally distinguished	SPTIKPTPDGSKEYFEKVN	SPTIKPTPDGSKEYFEK[170]VN	248	0	0	0	0	0	0	0	0	0	0	0	0	0	0	0	0	1	0	0
K	A0A498LEG1	Thioredoxin-dependent peroxide mitochondrial	marginally distinguished	SPTIKPTPDGSKEYFEKVN	SPTIKPTPDGSK[170]EYFEKVN	243	0	0	0	0	0	0	0	0	0	0	1	0	0	0	0	2	0	0	0
K	A0A498LEH2	Histone H4	subsumed	DAVTYTEHAKR	DAVTYTEHAK[170]R	78	0	0	0	0	0	0	0	0	0	1	0	0	0	0	0	0	0	0	0
K	A0A498LEH2	Histone H4	subsumed	DNIQGITKPAIR	DNIQGITK[170]PAIR	32	0	0	0	3	0	0	2	1	0	2	1	1	0	0	0	0	0	0	3
K	A0A498LEH2	Histone H4	subsumed	DNIQGITKPAIR	DNIQGITK[170]PAIR[170]	32	0	2	0	0	0	0	0	0	0	0	0	0	0	0	0	0	0	0	0
K	A0A498LEH2	Histone H4	subsumed	DNIQGITKPAIRR	DNIQGITK[170]PAIRR	32	0	0	0	0	0	0	0	0	0	1	0	0	0	0	0	0	0	0	0
K	A0A498LEH2	Histone H4	subsumed	KTVTAMDVVYALKR	KTVTAMDVVYALK[170]R	92	0	0	0	0	0	0	0	0	0	1	0	0	0	0	0	0	2	0	0
K	A0A498LEH2	Histone H4	subsumed	KTVTAMDVVYALKR	n[15]K[170]TVTAMDVVYALKR	80	0	0	0	4	1	0	2	0	0	8	0	0	0	0	0	0	4	0	1
K	A0A498LEH2	Histone H4	subsumed	KTVTAMDVVYALKR	n[15]K[170]TVTAM[147]DVVYALKR	80	0	0	0	0	0	0	1	0	0	0	0	0	0	0	0	0	0	0	0
K	A0A498LEH2	Histone H4	subsumed	TVTAMDVVYALKR	TVTAMDVVYALK[170]R	92	0	0	0	0	0	0	0	0	0	1	0	1	0	0	0	0	0	0	3
K	A0A498LEH5	Fibrinogen gamma chain-like protein	canonical	CHAAHLNGKYYQGGK	C[143]HAAHLNGK[170]YYQGGK	358	0	0	0	0	0	1	0	0	0	0	0	0	0	0	0	0	0	0	0
K	A0A498LEH5	Fibrinogen gamma chain-like protein	canonical	CHAAHLNGKYYQGGK	C[143]HAAHLN[115]GK[170]YYQGGK	358	0	0	0	0	0	1	0	0	0	0	0	0	0	0	0	0	6	0	13
K	A0A498LEH5	Fibrinogen gamma chain-like protein	canonical	CHAAHLNGKYYQGGK	C[160]HAAHLNGK[170]YYQGGK	358	0	0	0	0	0	0	0	0	0	0	0	0	0	0	0	0	4	0	1
K	A0A498LEH5	Fibrinogen gamma chain-like protein	canonical	CHAAHLNGKYYQGGK	C[160]HAAHLN[115]GK[170]YYQGGK	358	0	0	0	0	0	0	0	0	0	0	0	0	0	0	0	0	3	0	18
K	A0A498LEH5	Fibrinogen gamma chain-like protein	canonical	CHAAHLNGKYYQGGK	n[43]C[160]HAAHLN[115]GK[170]YYQGGK	350, 358	0	0	0	0	0	0	0	0	0	0	0	0	0	0	0	0	4	0	0
K	A0A498LEH5	Fibrinogen gamma chain-like protein	canonical	DCQDIANKGGK	DC[160]QDIAN[115]K[170]GGK	170	0	0	0	0	0	0	0	0	0	0	0	0	0	0	0	0	2	0	2
K	A0A498LEH5	Fibrinogen gamma chain-like protein	canonical	DCQDIANKGGKVSGLYYVKPAR	DC[160]QDIAN[115]K[170]GGKVSGLYYVKPAR	170	0	0	0	0	0	0	0	0	0	0	0	0	0	0	0	0	5	0	1
K	A0A498LEH5	Fibrinogen gamma chain-like protein	canonical	DCQDIANKGGKVSGLYYVKPAR	n[43]DC[160]QDIANK[170]GGKVSGLYYVKPAR	163, 170	0	0	0	0	0	0	0	0	0	0	0	0	0	0	0	0	0	0	2
K	A0A498LEH5	Fibrinogen gamma chain-like protein	canonical	DGSVDFNKNWVQYK	DGSVDFNK[170]NWVQYK	217	0	0	0	0	0	0	0	0	0	0	0	0	0	0	0	1	1	0	4
K	A0A498LEH5	Fibrinogen gamma chain-like protein	canonical	DGSVDFNKNWVQYK	DGSVDFN[115]K[170]NWVQYK	217	0	0	0	0	0	0	0	0	0	0	0	0	0	0	0	0	2	0	3
K	A0A498LEH5	Fibrinogen gamma chain-like protein	canonical	DTETQAQKQAPDTYIK	DTETQAQK[170]QAPDTYIK	87	0	0	0	0	0	0	0	0	0	0	0	0	0	0	0	0	2	0	12
K	A0A498LEH5	Fibrinogen gamma chain-like protein	canonical	DTETQAQKQAPDTYIKK	DTETQAQK[170]QAPDTYIKK	87	0	0	0	0	0	0	0	0	0	0	0	0	0	0	0	1	5	0	8
K	A0A498LEH5	Fibrinogen gamma chain-like protein	canonical	DTETQAQKQAPDTYIKK	n[43]DTETQAQK[170]QAPDTYIKK	80, 87	0	0	0	0	0	0	0	0	0	0	0	0	0	0	0	0	8	0	14
K	A0A498LEH5	Fibrinogen gamma chain-like protein	canonical	EGFGYLSPDDKTEFWLGNEK	EGFGYLSPDDK[170]TEFWLGNEK	234	0	0	0	0	0	0	0	0	0	0	0	0	0	0	0	0	1	0	2
K	A0A498LEH5	Fibrinogen gamma chain-like protein	canonical	EGFGYLSPDDKTEFWLGNEKIHLLSVQSSVPYILR	EGFGYLSPDDKTEFWLGNEK[170]IHLLSVQSSVPYILR	243	0	0	0	0	0	0	0	0	0	0	0	0	0	0	0	0	1	0	0
K	A0A498LEH5	Fibrinogen gamma chain-like protein	canonical	EGFGYLSPDDKTEFWLGNEKIHLLSVQSSVPYILR	E[111]GFGYLSPDDKTEFW[202]LGN[115]EK[170]IHLLSVQSSVPYILR	243	0	0	0	0	0	0	0	0	0	0	0	0	0	0	0	0	2	0	1
K	A0A498LEH5	Fibrinogen gamma chain-like protein	canonical	EGFGYLSPDDKTEFWLGNEKIHLLSVQSSVPYILR	E[111]GFGYLSPDDK[142]TEFWLGN[115]EK[170]IHLLSVQSSVPYILR	243	0	0	0	0	0	0	0	0	0	0	0	0	0	0	0	0	1	0	0
K	A0A498LEH5	Fibrinogen gamma chain-like protein	canonical	EGFGYLSPDDKTEFWLGNEKIHLLSVQSSVPYILR	E[111]GFGYLSPDDK[142]TEFW[202]LGNEK[170]IHLLSVQSSVPYILR	243	0	0	0	0	0	0	0	0	0	0	0	0	0	0	0	0	1	0	0
K	A0A498LEH5	Fibrinogen gamma chain-like protein	canonical	EGFGYLSPDDKTEFWLGNEKIHLLSVQSSVPYILR	E[111]GFGYLSPDDK[170]TEFW[202]LGN[115]EKIHLLSVQSSVPYILR	234	0	0	0	0	0	0	0	0	0	0	0	0	0	0	0	0	0	0	1
K	A0A498LEH5	Fibrinogen gamma chain-like protein	canonical	FEKSILAQEDQLYQLQSILQANEK	FEK[170]SILAQEDQLYQLQSILQANEK	109	0	0	0	0	0	0	0	0	0	0	0	0	0	0	0	0	0	0	2
K	A0A498LEH5	Fibrinogen gamma chain-like protein	canonical	FEKSILAQEDQLYQLQSILQANEKR	FEK[170]SILAQEDQLYQLQSILQANEKR	109	0	0	0	0	0	0	0	0	0	0	0	0	0	0	0	1	6	0	9
K	A0A498LEH5	Fibrinogen gamma chain-like protein	canonical	FEKSILAQEDQLYQLQSILQANEKR	FEK[170]SILAQEDQLYQLQSILQAN[115]EKR	109	0	0	0	0	0	0	0	0	0	0	0	0	0	0	0	0	1	0	0
K	A0A498LEH5	Fibrinogen gamma chain-like protein	canonical	FEKSILAQEDQLYQLQSILQANEKR	n[15]FEK[170]SILAQEDQLYQLQSILQANEKR	109	0	0	0	0	0	0	0	0	0	0	0	0	0	0	0	0	1	0	0
K	A0A498LEH5	Fibrinogen gamma chain-like protein	canonical	GAQDKVVYLRDTETQAQK	GAQDK[170]VVYLRDTETQAQK	74	0	0	0	0	0	0	0	0	0	0	0	0	0	0	0	0	0	0	1
K	A0A498LEH5	Fibrinogen gamma chain-like protein	canonical	GGKVSGLYYVKPAR	GGK[170]VSGLYYVKPAR	173	0	0	0	0	0	0	0	0	0	0	0	0	0	0	0	0	1	0	6
K	A0A498LEH5	Fibrinogen gamma chain-like protein	canonical	GGKVSGLYYVKPAR	n[43]GGK[170]VSGLYYVKPAR	171, 173	0	0	0	0	0	0	0	0	0	0	0	0	0	0	0	0	4	0	8
K	A0A498LEH5	Fibrinogen gamma chain-like protein	canonical	IEMVDWDGNKK	IEMVDWDGN[115]K[142]K[170]	269	0	0	0	0	0	0	0	0	0	0	0	0	0	0	0	0	1	0	0
K	A0A498LEH5	Fibrinogen gamma chain-like protein	canonical	IEMVDWDGNKK	IEMVDWDGN[115]K[170]K	268	0	0	0	0	0	0	0	0	0	0	0	0	0	0	0	0	5	0	0
K	A0A498LEH5	Fibrinogen gamma chain-like protein	canonical	IEMVDWDGNKK	n[43]IEMVDWDGNK[170]K	259, 268	0	0	0	0	0	0	0	0	0	0	0	0	0	0	0	0	0	0	2
K	A0A498LEH5	Fibrinogen gamma chain-like protein	canonical	IEMVDWDGNKKYADYATFK	IEMVDWDGNKK[170]YADYATFK	269	0	0	0	0	0	0	0	0	0	0	0	0	0	0	0	0	2	0	0
K	A0A498LEH5	Fibrinogen gamma chain-like protein	canonical	IEMVDWDGNKKYADYATFK	IEMVDWDGNK[170]K[170]YADYATFK	268, 269	0	0	0	0	0	0	0	0	0	0	0	0	0	0	0	0	0	0	2
K	A0A498LEH5	Fibrinogen gamma chain-like protein	canonical	IEMVDWDGNKKYADYATFK	IEMVDWDGN[115]K[142]K[170]YADYATFK	269	0	0	0	0	0	0	0	0	0	0	0	0	0	0	0	0	1	0	0
K	A0A498LEH5	Fibrinogen gamma chain-like protein	canonical	IEMVDWDGNKKYADYATFK	IEMVDWDGN[115]K[170]KYADYATFK	268	0	0	0	0	0	0	0	0	0	0	0	0	0	0	0	1	8	0	1
K	A0A498LEH5	Fibrinogen gamma chain-like protein	canonical	IEMVDWDGNKKYADYATFK	IEMVDWDGN[115]K[170]K[142]YADYATFK	268	0	0	0	0	0	0	0	0	0	0	0	0	0	0	0	0	1	0	0
K	A0A498LEH5	Fibrinogen gamma chain-like protein	canonical	IEMVDWDGNKKYADYATFK	IEMVDW[202]DGNK[170]KYADYATFK	268	0	0	0	0	0	0	0	0	0	0	0	0	0	0	0	0	1	0	0
K	A0A498LEH5	Fibrinogen gamma chain-like protein	canonical	IEMVDWDGNKKYADYATFK	n[43]IEMVDWDGNK[170]KYADYATFK	259, 268	0	0	0	0	0	0	0	0	0	0	0	0	0	0	0	0	0	0	4
K	A0A498LEH5	Fibrinogen gamma chain-like protein	canonical	IEMVDWDGNKKYADYATFK	n[43]IEMVDWDGN[115]K[170]KYADYATFK	259, 268	0	0	0	0	0	0	0	0	0	0	0	0	0	0	0	0	2	0	6
K	A0A498LEH5	Fibrinogen gamma chain-like protein	canonical	IGVDGQHSGAKQFGGLGDI	IGVDGQHSGAK[170]QFGGLGDI	413	0	0	0	0	0	0	0	0	0	0	0	0	0	0	0	0	0	0	2
K	A0A498LEH5	Fibrinogen gamma chain-like protein	canonical	ITDLKQMSLQLDQICK	ITDLK[170]QMSLQLDQIC[160]K	136	0	0	0	0	0	0	0	0	0	0	0	0	0	0	0	0	2	0	8
K	A0A498LEH5	Fibrinogen gamma chain-like protein	canonical	QAPDTYIKKSTSMLDDILR	QAPDTYIK[170]K[170]STSMLDDILR	95, 96	0	0	0	0	0	0	0	0	0	0	0	0	0	0	0	0	0	0	2
K	A0A498LEH5	Fibrinogen gamma chain-like protein	canonical	QAPDTYIKKSTSMLDDILR	Q[111]APDTYIK[170]K[170]STSMLDDILR	95, 96	0	0	0	0	0	0	0	0	0	0	0	0	0	0	0	0	0	0	4
K	A0A498LEH5	Fibrinogen gamma chain-like protein	canonical	QMSLQLDQICKEPCKDTVEIQSVTGK	QMSLQLDQIC[160]KEPC[160]K[170]DTVEIQSVTGK	151	0	0	0	0	0	0	0	0	0	0	0	0	0	0	0	0	2	0	0
K	A0A498LEH5	Fibrinogen gamma chain-like protein	canonical	QMSLQLDQICKEPCKDTVEIQSVTGK	QMSLQLDQIC[160]K[170]EPC[160]KDTVEIQSVTGK	147	0	0	0	0	0	0	0	0	0	0	0	0	0	0	0	0	7	0	3
K	A0A498LEH5	Fibrinogen gamma chain-like protein	canonical	QMSLQLDQICKEPCKDTVEIQSVTGK	QM[147]SLQLDQIC[160]K[170]EPC[160]KDTVEIQSVTGK	147	0	0	0	0	0	0	0	0	0	0	0	0	0	0	0	0	1	0	0
K	A0A498LEH5	Fibrinogen gamma chain-like protein	canonical	QMSLQLDQICKEPCKDTVEIQSVTGK	Q[111]M[147]SLQLDQIC[160]K[170]EPC[160]KDTVEIQSVTGK	147	0	0	0	0	0	0	0	0	0	0	0	0	0	0	0	0	1	0	0
K	A0A498LEH5	Fibrinogen gamma chain-like protein	canonical	QMSLQLDQICKEPCKDTVEIQSVTGK	n[15]QMSLQLDQIC[160]K[142]EPC[160]K[170]DTVEIQSVTGK	151	0	0	0	0	0	0	0	0	0	0	0	0	0	0	0	0	1	0	0
K	A0A498LEH5	Fibrinogen gamma chain-like protein	canonical	QMSLQLDQICKEPCKDTVEIQSVTGK	n[15]QMSLQLDQ[111]IC[160]K[170]EPC[160]KDTVEIQSVTGK	147	0	0	0	0	0	0	0	0	0	0	0	0	0	0	0	0	1	0	0
K	A0A498LEH5	Fibrinogen gamma chain-like protein	canonical	QMSLQLDQICKEPCKDTVEIQSVTGK	n[43]QMSLQLDQIC[160]K[142]EPC[160]K[170]DTVEIQSVTGK	137, 151	0	0	0	0	0	0	0	0	0	0	0	0	0	0	0	0	2	0	0
K	A0A498LEH5	Fibrinogen gamma chain-like protein	canonical	RDGSVDFNKNWVQYK	RDGSVDFNK[170]NWVQYK	217	0	0	0	0	0	0	0	0	0	0	0	0	0	0	0	0	2	0	2
K	A0A498LEH5	Fibrinogen gamma chain-like protein	canonical	RDGSVDFNKNWVQYK	RDGSVDFNK[170]N[115]WVQYK	217	0	0	0	0	0	0	0	0	0	0	0	0	0	0	0	0	2	0	0
K	A0A498LEH5	Fibrinogen gamma chain-like protein	canonical	RDGSVDFNKNWVQYK	RDGSVDFN[115]K[170]NWVQYK	217	0	0	0	0	0	0	0	0	0	0	0	0	0	0	0	0	0	0	1
K	A0A498LEH5	Fibrinogen gamma chain-like protein	canonical	SILAQEDQLYQLQSILQANEKR	SILAQEDQLYQLQSILQANEK[170]R	130	0	0	0	0	0	0	0	0	0	0	0	0	0	0	0	1	5	0	2
K	A0A498LEH5	Fibrinogen gamma chain-like protein	canonical	SILAQEDQLYQLQSILQANEKR	SILAQEDQLYQLQSILQAN[115]EK[170]R	130	0	0	5	0	0	0	0	0	0	0	0	0	0	2	0	10	13	0	9
K	A0A498LEH5	Fibrinogen gamma chain-like protein	canonical	SILAQEDQLYQLQSILQANEKR	SILAQEDQLYQLQSILQAN[115]EK[170]R[170]	130	0	0	0	0	0	0	0	0	5	0	0	0	0	0	0	2	17	0	0
K	A0A498LEH5	Fibrinogen gamma chain-like protein	canonical	VSGLYYVKPAR	n[43]VSGLYYVK[170]PAR	174, 181	0	0	0	0	0	0	0	0	0	0	0	0	0	0	0	0	2	0	10
K	A0A498LEH5	Fibrinogen gamma chain-like protein	canonical	VVYLRDTETQAQKQAPDTYIK	VVYLRDTETQAQK[170]QAPDTYIK	87	0	0	0	0	0	0	0	0	0	0	0	0	0	0	0	0	1	0	0
K	A0A498LEH5	Fibrinogen gamma chain-like protein	canonical	WYSLKETTMKIIPINR	WYSLKETTMK[170]IIPINR	396	0	0	0	0	0	0	0	0	0	0	0	0	0	0	0	0	1	0	1
K	A0A498LEH5	Fibrinogen gamma chain-like protein	canonical	WYSLKETTMKIIPINR	WYSLKETTMK[170]IIPIN[115]R	396	0	0	0	0	0	0	0	0	0	0	0	0	0	0	0	0	1	0	0
K	A0A498LEH5	Fibrinogen gamma chain-like protein	canonical	WYSLKETTMKIIPINR	WYSLK[170]ETTMKIIPINR	391	0	0	0	0	0	0	0	0	0	0	0	0	0	0	0	0	1	0	0
K	A0A498LEH5	Fibrinogen gamma chain-like protein	canonical	YADYATFKLGPEVDAYR	YADYATFK[170]LGPEVDAYR	277	0	0	1	0	0	0	0	0	0	0	0	0	0	0	0	6	11	0	14
K	A0A498LEH5	Fibrinogen gamma chain-like protein	canonical	YADYATFKLGPEVDAYR	n[43]YADYATFK[170]LGPEVDAYR	270, 277	0	0	0	0	0	0	0	0	0	0	0	0	0	0	0	0	0	0	2
K	A0A498LEH5	Fibrinogen gamma chain-like protein	canonical	YTEKDTQNGYDNGIIWATWHSR	YTEK[170]DTQNGYDNGIIWATWHSR	368	0	0	0	0	0	0	0	0	0	0	0	0	0	0	0	0	2	0	0
K	A0A498LEH5	Fibrinogen gamma chain-like protein	canonical	YTEKDTQNGYDNGIIWATWHSR	YTEK[170]DTQNGYDN[115]GIIWATWHSR	368	0	0	0	0	0	0	0	0	0	0	0	0	0	0	0	0	1	0	0
K	A0A498LEH5	Fibrinogen gamma chain-like protein	canonical	YTEKDTQNGYDNGIIWATWHSR	YTEK[170]DTQN[115]GYDNGIIWATWHSR	368	0	0	0	0	0	0	0	0	0	0	0	0	0	0	0	0	3	0	0
K	A0A498LEH5	Fibrinogen gamma chain-like protein	canonical	YTEKDTQNGYDNGIIWATWHSR	YTEK[170]DTQN[115]GYDN[115]GIIWATWHSR	368	0	0	0	0	0	0	0	0	0	0	0	0	0	0	0	0	4	0	3
K	A0A498LEJ3	Creatine kinase S-mitochondrial-like isoform X1	canonical	GQDIKIPAPIQQFR	GQDIK[170]IPAPIQQFR	421	0	0	3	0	0	0	0	0	0	0	0	0	0	0	0	0	0	0	0
K	A0A498LEJ3	Creatine kinase S-mitochondrial-like isoform X1	canonical	GQDIKIPAPIQQFRK	GQDIK[170]IPAPIQQFRK	421	0	0	1	0	0	0	0	0	0	0	0	0	0	0	0	0	0	0	0
K	A0A498LEJ3	Creatine kinase S-mitochondrial-like isoform X1	canonical	LEKGQDIKIPAPIQQFR	LEKGQDIK[170]IPAPIQQFR	421	0	0	1	0	0	0	0	0	0	0	0	0	0	0	0	0	0	0	0
K	A0A498LEJ3	Creatine kinase S-mitochondrial-like isoform X1	canonical	LEKGQDIKIPAPIQQFR	LEK[170]GQDIKIPAPIQQFR	416	0	0	1	0	0	0	0	0	0	0	0	0	0	0	0	0	0	0	0
K	A0A498LEJ3	Creatine kinase S-mitochondrial-like isoform X1	canonical	TMKHPTDLDASK	n[43]TMK[170]HPTDLDASK	137, 139	0	0	0	0	0	0	0	0	0	0	0	0	0	0	0	0	2	0	0
K	A0A498LEK9	Myosin heavy fast skeletal muscle-like protein	subsumed	ADIAESQVNKLR	ADIAESQVN[115]K[170]LR	156	0	0	3	0	0	0	0	0	0	0	0	0	0	0	0	0	0	0	0
K	A0A498LEK9	Myosin heavy fast skeletal muscle-like protein	subsumed	LQDLVDKLQLKVK	LQDLVDKLQLK[170]VK	111	0	0	0	0	0	0	0	0	0	0	0	0	0	0	0	0	1	0	0
K	A0A498LER9	Parvalbumin beta-like protein	marginally distinguished	AFLSAGDSDGDGKIGAEEFAALVK	AFLSAGDSDGDGK[142]IGAEEFAALVK[170]	231	0	0	0	0	0	0	0	0	0	0	0	1	0	0	0	0	0	0	0
K	A0A498LET5	Myosin heavy fast skeletal muscle-like protein	marginally distinguished	ADIAESQVNKLR	ADIAESQVN[115]K[170]LR	403	0	0	3	0	0	0	0	0	0	0	0	0	0	0	0	0	0	0	0
K	A0A498LET5	Myosin heavy fast skeletal muscle-like protein	marginally distinguished	LQDLVDKLQLKVK	LQDLVDKLQLK[170]VK	358	0	0	0	0	0	0	0	0	0	0	0	0	0	0	0	0	1	0	0
K	A0A498LET5	Myosin heavy fast skeletal muscle-like protein	marginally distinguished	MQGSLEDQIIAANPLLEAYGNAKTVR	M[147]QGSLEDQIIAANPLLEAYGN[115]AK[170]TVR	235	0	0	1	0	0	0	0	0	0	0	0	0	0	0	0	0	0	0	0
K	A0A498LET5	Myosin heavy fast skeletal muscle-like protein	marginally distinguished	RIEAPPHIFSISDNAYQFMLTDRENQSILITGESGAGK	RIEAPPHIFSISDNAYQFMLTDRENQSILITGESGAGK[170]	184	0	0	0	0	0	0	0	0	0	1	0	0	0	0	0	0	0	0	0
K	A0A498LET5	Myosin heavy fast skeletal muscle-like protein	marginally distinguished	VIQYFATIAVAGAK	VIQYFATIAVAGAK[170]	204	0	0	0	0	0	0	0	0	0	1	0	0	0	0	0	0	0	0	0
K	A0A498LET7	Collagen alpha-1(XXVIII) chain-like protein	indistinguishable representative	SPSALSAATDAKNHNIR	SPSALSAATDAK[170]N[115]HNIR	177	0	0	1	0	0	0	0	0	0	0	0	0	0	0	0	0	0	0	0
K	A0A498LEU6	Histone H2B	canonical	HAVSEGTKAVTK	HAVSEGTK[170]AVTK	115	0	0	0	0	0	0	0	0	0	0	0	0	0	0	0	0	3	0	1
K	A0A498LEU6	Histone H2B	canonical	LLLPGELAKHAVSEGTK	LLLPGELAK[170]HAVSEGTK	107	0	0	0	0	0	0	0	0	0	0	1	1	0	0	0	2	2	0	2
K	A0A498LEU6	Histone H2B	canonical	LLLPGELAKHAVSEGTKAVTK	LLLPGELAK[170]HAVSEGTKAVTK	107	0	0	0	0	0	0	0	0	0	0	0	0	0	0	0	0	0	0	1
K	A0A498LEU6	Histone H2B	canonical	VLKQVHPDTGISSK	VLK[170]QVHPDTGISSK	45	0	0	0	2	0	0	0	0	1	0	0	3	0	2	0	0	6	0	4
K	A0A498LEU6	Histone H2B	canonical	VLKQVHPDTGISSK	n[43]VLK[170]QVHPDTGISSK	43, 45	0	0	2	0	0	0	0	0	0	4	2	0	0	0	0	2	8	0	8
K	A0A498LEY8	C-factor-like protein	canonical	AAVKACNILITGANR	n[43]AAVK[170]AC[160]N[115]ILITGANR	2, 5, 513, 516	0	0	0	0	0	0	0	0	4	0	0	0	0	0	0	0	0	0	0
K	A0A498LEY8	C-factor-like protein	canonical	ASGTPGLSCNKAAVINISTVGGSITR	ASGTPGLSC[160]NK[170]AAVINISTVGGSITR	663	0	0	0	0	0	0	0	0	0	0	0	0	0	0	0	1	0	0	0
K	A0A498LEY8	C-factor-like protein	canonical	EYLPFLQKAAKASGTPGMSSNK	n[43]EY[243]LPFLQK[170]AAK[170]AS[167]GTPGMSSNK	131, 138, 141	0	0	0	0	0	0	0	0	0	0	0	0	0	0	0	0	0	0	3
K	A0A498LEY8	C-factor-like protein	canonical	GLGFETVKQLLEDSCPKR	GLGFETVK[170]QLLEDSC[160]PKR	535	0	0	0	0	0	0	0	0	0	0	0	0	0	0	0	1	0	0	0
K	A0A498LEY8	C-factor-like protein	canonical	GLGFETVKQLLEDSCPKR	n[43]GLGFETVK[170]QLLEDSC[160]PKR	528, 535	0	0	0	0	0	0	0	0	0	0	0	0	0	0	0	2	0	0	0
K	A0A498LEZ7	Periostin isoform X1	canonical	VVKPGVQVVETEPGVTTLTR	VVK[170]PGVQVVETEPGVTTLTR	831	0	0	0	0	0	0	0	0	0	0	0	0	0	0	0	0	0	0	1
K	A0A498LF02	Superoxide dismutase [Cu-Zn] (EC 1.15.1.1)	canonical	HGFHVHAFGDNTNGCISAGPHFNPHDKTHGGPTDSVR	HGFHVHAFGDNTNGC[160]ISAGPHFN[115]PHDK[170]THGGPTDSVR	70	0	0	0	0	0	0	0	0	0	0	0	0	0	1	0	0	0	0	0
K	A0A498LF02	Superoxide dismutase [Cu-Zn] (EC 1.15.1.1)	canonical	HGFHVHAFGDNTNGCISAGPHFNPHDKTHGGPTDSVR	HGFHVHAFGDNTNGC[160]ISAGPHFN[115]PHDK[170]THGGPTDSVR[170]	70	0	0	0	0	0	0	0	0	0	0	0	0	0	1	0	0	0	0	0
K	A0A498LF02	Superoxide dismutase [Cu-Zn] (EC 1.15.1.1)	canonical	HGFHVHAFGDNTNGCISAGPHFNPHDKTHGGPTDSVR	HGFHVHAFGDNTN[115]GC[160]ISAGPHFN[115]PHDK[170]THGGPTDSVR	70	0	0	0	0	0	0	0	0	0	0	0	0	0	1	0	1	0	0	1
K	A0A498LF02	Superoxide dismutase [Cu-Zn] (EC 1.15.1.1)	canonical	HGFHVHAFGDNTNGCISAGPHFNPHDKTHGGPTDSVR	HGFHVHAFGDNTN[115]GC[160]ISAGPHFN[115]PHDK[170]THGGPTDSVR[170]	70	0	0	0	0	0	0	0	0	0	0	0	0	0	0	0	2	0	0	0
K	A0A498LF02	Superoxide dismutase [Cu-Zn] (EC 1.15.1.1)	canonical	HVGDLGNVIAGDNGTAKIDIVDELVTLSGQHSVIGR	HVGDLGNVIAGDNGTAK[170]IDIVDELVTLSGQHSVIGR	97	0	0	1	0	0	0	0	0	0	0	0	0	0	1	0	7	0	0	5
K	A0A498LF02	Superoxide dismutase [Cu-Zn] (EC 1.15.1.1)	canonical	HVGDLGNVIAGDNGTAKIDIVDELVTLSGQHSVIGR	HVGDLGNVIAGDN[115]GTAK[170]IDIVDELVTLSGQHSVIGR	97	0	0	0	0	0	0	0	0	0	0	0	0	0	1	0	1	0	0	1
K	A0A498LF02	Superoxide dismutase [Cu-Zn] (EC 1.15.1.1)	canonical	TMVIHEKEDDLGKGGNEESLK	TMVIHEKEDDLGK[170]GGNEESLK	129	0	0	0	0	0	0	0	0	0	0	0	0	0	0	0	2	0	0	0
K	A0A498LF02	Superoxide dismutase [Cu-Zn] (EC 1.15.1.1)	canonical	TMVIHEKEDDLGKGGNEESLK	TMVIHEKEDDLGK[170]GGN[115]EESLK	129	0	0	0	0	0	0	0	0	0	0	0	0	0	0	0	2	0	0	0
K	A0A498LF02	Superoxide dismutase [Cu-Zn] (EC 1.15.1.1)	canonical	TMVIHEKEDDLGKGGNEESLK	n[43]TMVIHEK[142]EDDLGK[170]GGNEESLK	117, 129	0	0	0	0	0	0	0	0	0	0	0	0	0	0	0	2	0	0	0
K	A0A498LFD6	Protein disulfide-isomerase (EC 5.3.4.1)	canonical	KYAMEPEEFDSDVLR	n[43]K[170]YAM[147]EPEEFDSDVLR	2594	0	0	0	0	0	0	0	0	2	0	0	0	0	0	0	0	0	0	0
K	A0A498LFD6	Protein disulfide-isomerase (EC 5.3.4.1)	canonical	MDATANDIPHDSYKAEGFPTIYFAPSNKK	n[15]MDATAN[115]DIPHDSYK[170]AEGFPTIYFAPSNKK	2705	0	0	0	0	0	0	0	0	0	0	0	0	0	0	0	1	0	0	0
K	A0A498LFD6	Protein disulfide-isomerase (EC 5.3.4.1)	canonical	TLKENDPPIPVAK	n[43]TLK[170]ENDPPIPVAK	2216, 2218	0	0	0	0	0	0	0	0	0	0	0	0	0	0	0	2	0	0	0
K	A0A498LFD6	Protein disulfide-isomerase (EC 5.3.4.1)	canonical	TPPIPLAKVDATAESELATR	TPPIPLAK[170]VDATAESELATR	2343	0	0	2	0	0	0	0	0	1	0	0	0	0	1	0	5	0	0	1
K	A0A498LFE3	Myosin heavy chain, fast skeletal muscle-like	subsumed	IEDMAMMTHLNEPCVLYNLKER	IEDMAMMTHLNEPC[160]VLYN[115]LK[170]ER	106	0	0	0	0	1	0	0	0	0	0	0	0	0	0	0	0	0	0	0
K	A0A498LFE3	Myosin heavy chain, fast skeletal muscle-like	subsumed	TLTVKEDDIHPMNPPKFDK	TLTVKEDDIHPMN[115]PPK[170]FDK	83	0	0	0	0	1	0	0	0	0	0	0	0	0	0	0	0	0	0	0
K	A0A498LFE3	Myosin heavy chain, fast skeletal muscle-like	subsumed	TVNTKRVIQYFATVGAMSGPK	n[43]TVN[115]TK[170]RVIQYFATVGAMSGPK	280, 284	2	0	2	0	0	0	0	0	0	0	0	0	0	0	0	0	0	0	0
K	A0A498LFK2	Apolipoprotein B-100-like protein	canonical	ILYALQGNEIRPSTDPTK	ILYALQGN[115]EIR[170]PSTDPTK[170]	593	0	0	0	0	0	1	0	0	0	0	0	0	0	0	0	0	0	0	0
K	A0A498LFL9	Inter-alpha-trypsin inhibitor heavy chain H3-like protein	representative	EQYQKAVASGQTAGLVK	EQYQK[170]AVASGQTAGLVK	197	0	0	0	0	0	0	0	0	0	0	0	0	0	0	0	0	0	0	2
K	A0A498LFL9	Inter-alpha-trypsin inhibitor heavy chain H3-like protein	representative	EQYQKAVASGQTAGLVK	n[43]EQYQK[170]AVASGQTAGLVK	193, 197	0	0	0	0	0	0	0	0	0	0	0	0	0	0	0	0	0	0	4
K	A0A498LFL9	Inter-alpha-trypsin inhibitor heavy chain H3-like protein	representative	LWAYLTIQELLNKK	LWAYLTIQELLNK[170]K	1433	0	0	0	0	0	0	1	0	0	0	0	0	0	1	0	0	0	0	0
K	A0A498LFM1	ATP-dependent RNA helicase DDX1	canonical	ALIIEPSKELAEQTLNNVNQFKK	ALIIEPSKELAEQTLNNVN[115]QFK[170]K	310	0	0	0	0	0	0	0	0	0	0	0	0	0	1	0	0	0	0	0
K	A0A498LFM1	ATP-dependent RNA helicase DDX1	canonical	DGYVALNQASDGHVVKSSQTGSAK	DGYVALN[115]QASDGHVVK[170]SSQTGSAK	268	0	0	0	0	0	0	0	0	0	0	0	0	0	1	0	0	0	0	0
K	A0A498LFM1	ATP-dependent RNA helicase DDX1	canonical	FNFGDEPLKNQPKDGYVALNQASDGHVVK	FNFGDEPLKN[115]QPK[170]DGYVALNQASDGHVVK	252	0	0	0	0	0	0	0	0	0	0	0	0	0	1	0	0	0	0	0
K	A0A498LFM1	ATP-dependent RNA helicase DDX1	canonical	FNFGDEPLKNQPKDGYVALNQASDGHVVK	FNFGDEPLK[170]N[115]QPKDGYVALNQASDGHVVK	248	0	0	0	0	0	0	0	0	0	0	0	0	0	1	0	0	0	0	0
K	A0A498LFM1	ATP-dependent RNA helicase DDX1	canonical	GIDIHGVPYVINVTLPDEKQNYVHR	GIDIHGVPYVINVTLPDEK[170]QN[115]YVHR	596	0	0	0	0	0	0	0	0	0	0	0	0	0	3	0	0	0	0	0
K	A0A498LFM1	ATP-dependent RNA helicase DDX1	canonical	NAELKFNFGDEPLKNQPK	NAELK[170]FNFGDEPLKNQPK	239	0	0	0	0	0	0	0	0	0	0	0	0	0	1	0	0	0	0	0
K	A0A498LFM1	ATP-dependent RNA helicase DDX1	canonical	NQPFFASCVLKNAELK	NQPFFASC[160]VLK[142]N[115]AELK[170]	239	0	0	0	0	0	0	0	0	0	0	0	0	0	1	0	0	0	0	0
K	A0A498LFM1	ATP-dependent RNA helicase DDX1	canonical	SAVKTGGAVFNKWQMNPYDR	SAVK[170]TGGAVFN[115]KWQMNPYDR	82	0	0	0	0	0	0	0	0	0	0	0	0	0	1	0	0	0	0	0
K	A0A498LFM1	ATP-dependent RNA helicase DDX1	canonical	TDEVHAKDDTRPGANTSEMWSEAIK	TDEVHAK[170]DDTRPGAN[115]TSEMWSEAIK	472	0	0	0	0	0	0	0	0	0	0	0	0	0	1	0	0	0	0	0
K	A0A498LFM1	ATP-dependent RNA helicase DDX1	canonical	TDEVHAKDDTRPGANTSEMWSEAIK	TDEVHAK[170]DDTRPGAN[115]TSEM[147]WSEAIK	472	0	0	0	0	0	0	0	0	0	0	0	0	0	2	0	0	0	0	0
K	A0A498LFM1	ATP-dependent RNA helicase DDX1	canonical	TGGAVFNKWQMNPYDR	TGGAVFN[115]K[170]WQMNPYDR	90	0	0	0	0	0	0	0	0	0	0	0	0	0	1	0	0	0	0	0
K	A0A498LFM1	ATP-dependent RNA helicase DDX1	canonical	VSQVKSSSNAPR	VSQVK[170]SSSNAPR	281	0	0	0	0	0	0	0	0	0	0	0	0	0	1	0	0	0	0	0
K	A0A498LFM5	Acyl--binding	canonical	AKPTDAEMLEIYSLFKQATVGDVNTARPGMLDFTGK	AKPTDAEMLEIYSLFK[170]QATVGDVNTARPGMLDFTGK	33	0	0	0	0	0	0	0	0	0	0	0	0	0	0	0	1	0	0	0
K	A0A498LFM5	Acyl--binding	canonical	QLKAKPTDAEMLEIYSLFK	n[43]QLK[170]AKPTDAEMLEIYSLFK	15, 17	0	0	0	0	0	0	0	0	0	0	0	0	0	0	0	2	0	0	0
K	A0A498LFM5	Acyl--binding	canonical	SEAEFQKAAEEVKQLK	n[43]SEAEFQK[170]AAEEVKQLK	2, 8	0	0	0	0	0	0	0	0	0	0	0	0	0	0	0	6	0	0	0
K	A0A498LFS7	Formin 2 isoform X1	canonical	REYSMHGHNTLLK	n[43]REYSMHGHN[115]T[181]LLK[170]	2475, 2487	0	0	0	2	0	0	0	0	0	0	0	0	0	0	0	0	0	0	0
K	A0A498LFT2	Extracellular calcium-sensing receptor	canonical	ASCAVQLIDKVTR	n[43]ASC[160]AVQLIDK[170]VTR	2, 11	0	0	0	0	0	0	0	0	0	0	0	0	0	2	0	0	0	0	0
K	A0A498LFT2	Extracellular calcium-sensing receptor	canonical	YKESLGLPQKLVIGYQAHADTATK	YKESLGLPQK[170]LVIGYQAHADTATK	206	0	0	0	0	0	0	0	0	0	0	0	0	0	3	0	0	0	0	0
K	A0A498LFT5	Glutaredoxin-3	canonical	KTTSFFGVGLRPSK	n[15]K[170]TTSFFGVGLRPSK	1340	0	0	0	0	0	0	0	0	0	0	0	0	0	0	0	0	0	3	0
K	A0A498LFT5	Glutaredoxin-3	canonical	WSQGTGTSGTVASQSSSPSQGSKAPSR	WSQGTGTSGTVASQSSSPSQGSK[170]APSR	820	0	0	0	0	0	0	0	0	0	0	0	0	0	0	0	0	0	1	0
K	A0A498LFT5	Glutaredoxin-3	canonical	YALAALDAKVPVYSQAASSGSSALSQK	YALAALDAK[170]VPVYSQAASSGSSALSQK	775	0	0	0	0	0	0	0	0	0	0	0	0	0	0	0	0	0	5	0
K	A0A498LFT5	Glutaredoxin-3	canonical	YALAALDAKVPVYSQAASSGSSALSQK	n[15]YALAALDAK[170]VPVYSQAASSGSSALSQK	775	0	0	0	0	0	0	0	0	0	0	0	0	0	0	0	0	0	2	0
K	A0A498LFT5	Glutaredoxin-3	canonical	YGGLSSLSQGTSSQYGSGSLAYAKR	YGGLSSLSQGTSSQYGSGSLAYAK[170]R	1206	0	0	0	0	0	0	0	0	0	0	0	0	0	0	0	0	0	1	0
K	A0A498LG00	MHC class I antigen	indistinguishable	GYLEKECVDWLKK	n[43]GYLEK[170]EC[160]VDWLKK	350, 354, 410, 414	0	0	0	0	0	0	0	0	0	0	0	0	0	0	0	0	0	0	4
K	A0A498LG23	Pyruvate dehydrogenase E1 component subunit beta (EC 1.2.4.1)	marginally distinguished	AAIRDDNPVVVLENELMYGVPFELSDEAQSKDFVIPIGK	AAIRDDNPVVVLENELM[147]YGVPFELSDEAQSK[170]DFVIPIGK	219	0	0	0	0	0	0	0	0	0	0	0	0	0	0	0	1	0	0	0
K	A0A498LG23	Pyruvate dehydrogenase E1 component subunit beta (EC 1.2.4.1)	marginally distinguished	TIRPLDTEAIETSVMK	TIRPLDTEAIETSVM[147]K[170]	285	0	0	1	0	0	0	0	0	0	0	0	0	0	0	0	0	0	0	0
K	A0A498LG69	Alpha-1,4 glucan phosphorylase (EC 2.4.1.1)	canonical	AIPAADLSEQISTAGTEASGTGNMK	AIPAADLSEQISTAGTEASGTGN[115]MK[170]	681	0	0	0	0	1	0	0	0	0	0	0	0	0	0	0	0	0	0	0
K	A0A498LG69	Alpha-1,4 glucan phosphorylase (EC 2.4.1.1)	canonical	GYNASEYYNRIPELKQAIDQIAGGFFSPK	n[15]GY[243]N[115]ASEYYNR[170]IPELK[170]QAIDQIAGGFFSPK	740	1	0	0	0	0	0	0	0	0	0	0	0	0	0	0	0	0	0	0
K	A0A498LG69	Alpha-1,4 glucan phosphorylase (EC 2.4.1.1)	canonical	SKPLSDHDRK	n[43]SK[170]PLSDHDRK	2, 3	0	0	2	0	0	0	0	0	0	0	0	0	0	0	0	0	0	0	0
K	A0A498LG70	COP9 signalosome complex subunit 7a-like protein	canonical	ADIENYTSLQEFTEDISHSGNRPILTAQGK	n[43]ADIENYTSLQEFTEDISHSGN[115]RPILTAQGK[170]	2, 31	0	0	0	0	0	0	0	0	0	0	0	0	0	0	0	4	0	0	0
K	A0A498LG80	Sodium/potassium-transporting ATPase subunit alpha	canonical	AIAKGVGIISEGNETVEDIAAR	AIAK[170]GVGIISEGNETVEDIAAR	618	0	0	0	0	0	0	0	0	0	0	3	0	0	0	0	0	0	0	0
K	A0A498LG80	Sodium/potassium-transporting ATPase subunit alpha	canonical	EQPMDEEMKEAFQNAYLELGGLGER	EQPM[147]DEE[111]M[147]K[170]EAFQN[115]AYLELGGLGER	524	0	0	0	0	0	0	0	0	0	0	1	0	0	0	0	0	0	0	0
K	A0A498LG80	Sodium/potassium-transporting ATPase subunit alpha	canonical	NLEAVETLGSTSTICSDKTGTLTQNR	NLEAVETLGSTSTIC[160]SDK[170]TGTLTQN[115]R[170]	366	0	0	0	0	0	0	1	0	0	0	0	0	0	0	0	0	0	0	0
K	A0A498LG80	Sodium/potassium-transporting ATPase subunit alpha	canonical	QGAIVAVTGDGVNDSPALKK	QGAIVAVTGDGVNDSPALK[170]K	715	0	0	0	0	0	0	0	0	0	0	1	0	0	0	0	0	0	0	0
K	A0A498LG80	Sodium/potassium-transporting ATPase subunit alpha	canonical	QGAIVAVTGDGVNDSPALKK	QGAIVAVTGDGVN[115]DSPALK[142]K[170]	716	0	0	0	0	0	0	1	0	0	0	2	0	0	0	0	0	0	0	0
K	A0A498LG80	Sodium/potassium-transporting ATPase subunit alpha	canonical	QGAIVAVTGDGVNDSPALKK	QGAIVAVTGDGVN[115]DSPALK[170]K	715	0	0	0	0	0	0	3	0	0	0	2	0	0	0	0	0	0	0	0
K	A0A498LG80	Sodium/potassium-transporting ATPase subunit alpha	canonical	QGAIVAVTGDGVNDSPALKK	Q[111]GAIVAVTGDGVN[115]DSPALK[170]K	715	0	0	0	0	0	0	0	0	0	0	2	0	0	0	0	0	0	0	0
K	A0A498LGF7	Myosin heavy fast skeletal muscle-like protein	marginally distinguished	ADIAESQVNKLR	ADIAESQVN[115]K[170]LR	403	0	0	3	0	0	0	0	0	0	0	0	0	0	0	0	0	0	0	0
K	A0A498LGF7	Myosin heavy fast skeletal muscle-like protein	marginally distinguished	LQDLVDKLQLKVK	LQDLVDKLQLK[170]VK	358	0	0	0	0	0	0	0	0	0	0	0	0	0	0	0	0	1	0	0
K	A0A498LGF7	Myosin heavy fast skeletal muscle-like protein	marginally distinguished	MQGSLEDQIIAANPLLEAYGNAKTVR	M[147]QGSLEDQIIAANPLLEAYGN[115]AK[170]TVR	235	0	0	1	0	0	0	0	0	0	0	0	0	0	0	0	0	0	0	0
K	A0A498LGF7	Myosin heavy fast skeletal muscle-like protein	marginally distinguished	RIEAPPHIFSISDNAYQFMLTDRENQSILITGESGAGK	RIEAPPHIFSISDNAYQFMLTDRENQSILITGESGAGK[170]	184	0	0	0	0	0	0	0	0	0	1	0	0	0	0	0	0	0	0	0
K	A0A498LGK1	Histone H4	subsumed	DAVTYTEHAKR	DAVTYTEHAK[170]R	227	0	0	0	0	0	0	0	0	0	1	0	0	0	0	0	0	0	0	0
K	A0A498LGK1	Histone H4	subsumed	DNIQGITKPAIR	DNIQGITK[170]PAIR	181	0	0	0	3	0	0	2	1	0	2	1	1	0	0	0	0	0	0	3
K	A0A498LGK1	Histone H4	subsumed	DNIQGITKPAIR	DNIQGITK[170]PAIR[170]	181	0	2	0	0	0	0	0	0	0	0	0	0	0	0	0	0	0	0	0
K	A0A498LGK1	Histone H4	subsumed	DNIQGITKPAIRR	DNIQGITK[170]PAIRR	181	0	0	0	0	0	0	0	0	0	1	0	0	0	0	0	0	0	0	0
K	A0A498LGK1	Histone H4	subsumed	KTVTAMDVVYALKR	KTVTAMDVVYALK[170]R	241	0	0	0	0	0	0	0	0	0	1	0	0	0	0	0	0	2	0	0
K	A0A498LGK1	Histone H4	subsumed	KTVTAMDVVYALKR	n[15]K[170]TVTAMDVVYALKR	229	0	0	0	4	1	0	2	0	0	8	0	0	0	0	0	0	4	0	1
K	A0A498LGK1	Histone H4	subsumed	KTVTAMDVVYALKR	n[15]K[170]TVTAM[147]DVVYALKR	229	0	0	0	0	0	0	1	0	0	0	0	0	0	0	0	0	0	0	0
K	A0A498LGK1	Histone H4	subsumed	KVLRDNIQGITKPAIR	n[15]K[170]VLRDNIQGITKPAIR	170	0	0	0	0	0	0	0	0	0	1	0	0	0	0	0	0	0	0	0
K	A0A498LGK1	Histone H4	subsumed	KVLRDNIQGITKPAIR	n[15]K[170]VLR[170]DN[115]IQGITKPAIR	170	0	0	0	0	0	0	0	0	0	1	0	0	0	0	0	0	0	0	0
K	A0A498LGK1	Histone H4	subsumed	KVLRDNIQGITKPAIR	n[43]KVLRDNIQGITK[170]PAIR	170, 181	0	0	0	0	0	0	0	0	0	0	0	0	0	0	0	2	0	0	0
K	A0A498LGK1	Histone H4	subsumed	KVLRDNIQGITKPAIR	n[43]K[170]VLRDNIQGITKPAIR	170	0	0	0	0	0	0	0	0	0	2	0	0	0	0	0	0	0	0	0
K	A0A498LGK1	Histone H4	subsumed	TVTAMDVVYALKR	TVTAMDVVYALK[170]R	241	0	0	0	0	0	0	0	0	0	1	0	1	0	0	0	0	0	0	3
K	A0A498LGK8	Myosin heavy fast skeletal muscle-like protein	subsumed	IEDMAMMTHLNEPCVLYNLKER	IEDMAMMTHLNEPC[160]VLYN[115]LK[170]ER	106	0	0	0	0	1	0	0	0	0	0	0	0	0	0	0	0	0	0	0
K	A0A498LGK8	Myosin heavy fast skeletal muscle-like protein	subsumed	TLTVKEDDIHPMNPPKFDK	TLTVKEDDIHPMN[115]PPK[170]FDK	83	0	0	0	0	1	0	0	0	0	0	0	0	0	0	0	0	0	0	0
K	A0A498LGM3	Cysteine-rich 1	canonical	CNKTLSAGSHAEHDGKPYCNNPCYSALFGPK	n[43]C[143]NK[170]TLSAGSHAEHDGKPYC[160]N[115]NPC[160]YSALFGPK	34, 36	0	0	0	0	0	0	0	0	0	0	0	0	0	0	0	0	0	0	2
K	A0A498LGR2	Histone H1-like protein	subsumed	AETAPAAAAPPAKAPK	n[43]AETAPAAAAPPAK[170]APK	2, 14	0	0	0	0	0	0	0	0	2	0	0	0	0	0	0	0	0	0	0
K	A0A498LGR2	Histone H1-like protein	subsumed	ALSAGGYDVEKNNSR	ALSAGGYDVEK[170]N[115]NSR	66	0	0	0	0	0	0	0	0	0	0	0	0	0	0	0	0	1	0	0
K	A0A498LGR2	Histone H1-like protein	subsumed	ALSAGGYDVEKNNSR	ALSAGGYDVEK[170]N[115]NSR[170]	66	0	0	0	0	0	0	0	0	0	1	2	1	0	0	0	0	5	0	1
K	A0A498LGR2	Histone H1-like protein	subsumed	DLIVKTVTASKER	n[43]DLIVK[170]TVTASKER	33, 37	0	0	0	0	0	0	0	0	0	0	0	0	0	0	0	0	0	0	2
K	A0A498LGR2	Histone H1-like protein	subsumed	IAVKSLVTNGTLVQTK	IAVK[170]SLVTNGTLVQTK	76	0	0	0	0	0	0	0	0	0	0	0	0	0	0	0	0	1	0	0
K	A0A498LGR2	Histone H1-like protein	subsumed	IAVKSLVTNGTLVQTK	IAVK[170]SLVTN[115]GTLVQTK	76	0	0	0	0	0	0	0	0	1	0	0	0	0	0	0	0	11	0	4
K	A0A498LGR2	Histone H1-like protein	subsumed	KALSAGGYDVEKNNSR	KALSAGGYDVEK[170]NNSR	66	0	0	0	0	0	0	0	0	0	0	0	0	0	0	0	0	1	0	0
K	A0A498LGR2	Histone H1-like protein	subsumed	KALSAGGYDVEKNNSR	KALSAGGYDVEK[170]N[115]NSR	66	0	0	0	0	0	0	0	0	0	0	0	0	0	0	0	0	0	0	1
K	A0A498LGR2	Histone H1-like protein	subsumed	KALSAGGYDVEKNNSR	n[15]K[170]ALSAGGYDVEKNNSR	55	0	0	0	0	0	0	0	0	0	0	0	0	0	0	0	0	1	0	0
K	A0A498LGR2	Histone H1-like protein	subsumed	KPAAAKKPAKSPK	n[15]K[142]PAAAK[142]K[170]PAKS[167]PK	166	0	0	0	0	0	0	0	0	0	0	0	0	0	0	0	1	0	0	0
K	A0A498LGR2	Histone H1-like protein	subsumed	SGVSLAALKK	SGVSLAALK[170]K	54	0	0	0	0	0	0	0	0	0	0	0	0	0	0	0	0	1	0	0
K	A0A498LGR2	Histone H1-like protein	subsumed	SLVTNGTLVQTKGTGASGSFK	SLVTNGTLVQTK[170]GTGASGSFK	88	0	0	0	0	0	0	0	0	0	0	0	0	0	0	0	0	1	0	0
K	A0A498LGR2	Histone H1-like protein	subsumed	SLVTNGTLVQTKGTGASGSFK	SLVTN[115]GTLVQTK[170]GTGASGSFK	88	0	0	0	0	0	0	0	0	0	0	0	0	0	0	0	0	2	0	0
K	A0A498LGV3	Septin-6 isoform X3	canonical	RNEFMGELQK	RN[115]EFMGELQK[170]	310	0	0	0	1	0	0	0	0	0	0	0	0	0	0	0	0	0	0	0
K	A0A498LGX8	Creatine kinase M-type-like protein	canonical	FALEEEYPDLSLHNNHMAK	FALEEEYPDLSLHNNHM[147]AK[170]	40	2	0	0	0	2	0	0	0	0	0	0	0	0	0	0	0	0	0	0
K	A0A498LGX8	Creatine kinase M-type-like protein	canonical	FALEEEYPDLSLHNNHMAK	FALEEEYPDLSLHNN[115]HMAK[170]	40	1	0	0	0	0	0	0	0	0	0	0	0	0	0	0	0	0	0	0
K	A0A498LGX8	Creatine kinase M-type-like protein	canonical	FALEEEYPDLSLHNNHMAK	FALEEEYPDLSLHN[115]NHMAK[170]	40	0	0	0	0	1	0	0	0	0	0	0	0	0	0	0	0	0	0	0
K	A0A498LGX8	Creatine kinase M-type-like protein	canonical	FALEEEYPDLSLHNNHMAK	FALEEEYPDLSLHN[115]N[115]HMAK[170]	40	0	0	0	0	1	0	0	0	0	0	0	0	0	0	0	0	0	0	0
K	A0A498LGX8	Creatine kinase M-type-like protein	canonical	FALEEEYPDLSLHNNHMAKVLSK	FALEEEYPDLSLHN[115]NHMAK[170]VLSK	40	1	0	0	0	1	0	0	0	0	0	0	0	0	0	0	0	1	0	0
K	A0A498LGX8	Creatine kinase M-type-like protein	canonical	MKFALEEEYPDLSLHNNHMAK	n[15]MK[170]FALEEEYPDLSLHNNHMAK	21	3	0	0	0	0	0	0	0	0	0	0	0	0	0	0	0	0	0	0
K	A0A498LGX8	Creatine kinase M-type-like protein	canonical	NCHNDYKMKFALEEEYPDLSLHNNHMAK	n[15]N[115]C[160]HNDYK[170]MKFALEEEYPDLSLHNNHMAK	19	1	0	0	0	0	0	0	0	0	0	0	0	0	0	0	0	0	0	0
K	A0A498LH16	Histone-like protein	indistinguishable representative	LAKAEDAKKPEKPKPAAVK	LAK[170]AEDAKKPEKPKPAAVK	105	0	0	0	0	0	0	0	0	0	0	0	0	0	0	0	0	0	0	2
K	A0A498LH16	Histone-like protein	indistinguishable representative	LAKAEDAKKPEKPKPAAVK	n[43]LAK[170]AEDAKKPEKPKPAAVK	103, 105	0	0	0	0	0	0	0	0	0	0	0	0	0	0	0	0	0	0	4
K	A0A498LH16	Histone-like protein	indistinguishable representative	NHYKVGDNADSQIK	NHYK[170]VGDN[115]ADSQIK	67	0	0	0	0	0	0	0	0	0	0	0	0	0	0	0	0	0	0	1
K	A0A498LH45	Myosin heavy fast skeletal muscle-like protein	marginally distinguished	IEDMAMMTHLNEPCVLYNLKER	IEDMAMMTHLNEPC[160]VLYN[115]LK[170]ER	106	0	0	0	0	1	0	0	0	0	0	0	0	0	0	0	0	0	0	0
K	A0A498LH78	40S ribosomal protein S7	subsumed	TLTNVHDAILEDLVFPSEIVGKR	TLTNVHDAILEDLVFPSEIVGK[170]R	67	0	0	0	0	0	0	0	0	0	0	0	0	0	0	0	1	0	0	0
K	A0A498LHI3	Dehydrogenase reductase SDR family member 13-like protein	canonical	LMSFRPICSANHKESK	LMSFRPIC[160]SANHK[170]ESK	120	0	0	1	0	0	0	0	0	0	0	0	0	0	0	0	0	0	0	0
K	A0A498LHI8	Aspartate aminotransferase (EC 2.6.1.1)	canonical	KVEKMIADDHSLNHEYLPILGLPEFR	KVEK[170]MIADDHSLN[115]HEYLPILGLPEFR	56	0	0	1	0	0	0	0	0	0	0	0	0	0	0	0	0	0	0	0
K	A0A498LHM6	Histone H2B	subsumed	HAVSEGTKAVTK	HAVSEGTK[170]AVTK	117	0	0	0	0	0	0	0	0	0	0	0	0	0	0	0	0	3	0	1
K	A0A498LHM6	Histone H2B	subsumed	HAVSEGTKAVTKYTSSK	HAVSEGTKAVTK[170]YTSSK	121	0	0	1	0	0	0	0	0	0	0	0	0	0	0	0	0	0	0	1
K	A0A498LHM6	Histone H2B	subsumed	HAVSEGTKAVTKYTSSK	HAVSEGTK[170]AVTKYTSSK	117	0	0	0	0	0	0	0	0	0	0	0	0	0	0	0	0	0	0	3
K	A0A498LHM6	Histone H2B	subsumed	HAVSEGTKAVTKYTSSK	n[43]HAVSEGTKAVTK[170]YTSSK	110, 121	0	0	0	0	0	0	0	0	0	0	0	0	0	0	0	0	0	0	2
K	A0A498LHM6	Histone H2B	subsumed	KESYAIYVYK	n[15]K[170]ESYAIYVYK	35	0	1	0	0	0	0	0	0	0	0	0	0	0	0	1	0	0	0	0
K	A0A498LHM6	Histone H2B	subsumed	LLLPGELAKHAVSEGTK	LLLPGELAK[170]HAVSEGTK	109	0	0	0	0	0	0	0	0	0	0	1	1	0	0	0	2	2	0	2
K	A0A498LHM6	Histone H2B	subsumed	LLLPGELAKHAVSEGTKAVTK	LLLPGELAK[170]HAVSEGTKAVTK	109	0	0	0	0	0	0	0	0	0	0	0	0	0	0	0	0	0	0	1
K	A0A498LHM6	Histone H2B	subsumed	QVHPDTGISSKAMGIMNSFVNDIFER	QVHPDTGISSK[170]AMGIMNSFVNDIFER	58	0	0	0	0	0	0	0	0	0	0	0	0	0	0	0	0	0	0	1
K	A0A498LHM6	Histone H2B	subsumed	QVHPDTGISSKAMGIMNSFVNDIFER	QVHPDTGISSK[170]AMGIMN[115]SFVNDIFER	58	0	0	0	0	0	0	0	0	0	0	0	0	0	0	0	0	1	0	0
K	A0A498LHM6	Histone H2B	subsumed	QVHPDTGISSKAMGIMNSFVNDIFER	QVHPDTGISSK[170]AM[147]GIMNSFVNDIFER	58	0	0	0	0	0	0	0	0	0	0	0	0	0	0	0	1	0	0	0
K	A0A498LHM6	Histone H2B	subsumed	QVHPDTGISSKAMGIMNSFVNDIFER	Q[111]VHPDTGISSK[170]AMGIMNSFVNDIFER	58	0	0	0	0	0	0	0	0	0	0	0	0	0	0	0	0	0	0	1
K	A0A498LHM6	Histone H2B	subsumed	QVHPDTGISSKAMGIMNSFVNDIFER	Q[111]VHPDTGISSK[170]AM[147]GIMN[115]SFVNDIFER	58	0	0	0	0	0	0	0	0	0	0	0	0	0	0	0	0	0	0	1
K	A0A498LHM6	Histone H2B	subsumed	VLKQVHPDTGISSK	VLK[170]QVHPDTGISSK	47	0	0	0	2	0	0	0	0	1	0	0	3	0	2	0	0	6	0	4
K	A0A498LHM6	Histone H2B	subsumed	VLKQVHPDTGISSK	n[43]VLK[170]QVHPDTGISSK	45, 47	0	0	2	0	0	0	0	0	0	4	2	0	0	0	0	2	8	0	8
K	A0A498LHP7	14-3-3 epsilon	canonical	EAAENSLVAYKAASDIAMTDLQPTHPIR	EAAEN[115]SLVAYK[170]AASDIAMTDLQPTHPIR	153	0	0	0	0	0	0	0	0	0	0	0	0	0	0	0	0	0	0	1
K	A0A498LHP7	14-3-3 epsilon	canonical	GDREDLVYQAKLAEQAER	n[43]GDREDLVYQAK[170]LAEQAER	2, 12	0	0	2	0	0	0	0	0	0	0	0	0	0	2	0	0	0	0	2
K	A0A498LHP7	14-3-3 epsilon	canonical	NLLSVAYKNVIGAR	NLLSVAYK[170]N[115]VIGAR	50	0	0	0	0	0	0	0	1	0	0	1	0	0	0	0	0	0	0	0
K	A0A498LHP7	14-3-3 epsilon	canonical	NLLSVAYKNVIGAR	NLLSVAYK[170]N[115]VIGAR[170]	50	0	0	0	0	0	0	2	0	0	0	0	0	0	0	0	0	0	0	0
K	A0A498LHP7	14-3-3 epsilon	canonical	YLAEFATGNDRKEAAENSLVAYK	YLAEFATGN[115]DR[170]K[170]EAAENSLVAYK	142	0	0	0	0	0	0	1	0	0	0	0	0	0	0	0	0	0	0	0
K	A0A498LHR2	Transgelin	canonical	DFSEEQLKEGQSVIGLQMGTNK	DFSEEQLKEGQSVIGLQMGTN[115]K[170]	181	0	0	0	0	0	0	0	1	0	0	0	0	0	0	0	0	0	0	0
K	A0A498LHR2	Transgelin	canonical	DFSEEQLKEGQSVIGLQMGTNK	DFSEEQLK[170]EGQSVIGLQMGTNK	167	0	0	0	0	0	0	0	0	0	0	0	0	0	0	0	0	0	0	2
K	A0A498LHR2	Transgelin	canonical	DGCVLCELINSLCK	DGC[160]VLC[160]ELINSLC[160]K[170]	71	0	0	0	3	0	0	0	5	0	0	0	0	0	0	0	0	0	0	0
K	A0A498LHR2	Transgelin	canonical	IDKKYDPELEDR	n[43]IDK[170]KYDPELEDR	18, 20	0	0	0	0	0	0	0	0	0	0	0	0	0	0	0	0	0	0	2
K	A0A498LHR2	Transgelin	canonical	IQSSAMAFKQMEQISQFLGAAER	IQSSAMAFK[170]QMEQISQFLGAAER	87	0	0	0	0	0	0	0	0	0	0	0	0	0	0	0	0	0	0	2
K	A0A498LHR2	Transgelin	canonical	KIQSSAMAFKQMEQISQFLGAAER	KIQSSAMAFK[170]QMEQISQFLGAAER	87	0	0	0	0	0	0	0	0	0	0	0	0	0	0	0	0	0	0	3
K	A0A498LHT6	ADP ATP translocase 2	canonical	AFFKGAWSNVLR	AFFK[170]GAWSNVLR	272	0	0	0	0	0	0	0	0	0	0	0	0	0	0	0	1	0	0	0
K	A0A498LHT6	ADP ATP translocase 2	canonical	DEGGKAFFKGAWSNVLR	DEGGKAFFK[170]GAWSNVLR	272	0	0	1	0	0	0	0	0	0	0	1	0	0	0	0	2	0	0	0
K	A0A498LHT6	ADP ATP translocase 2	canonical	DFLAGGIAAAISKTAVAPIER	DFLAGGIAAAISK[170]TAVAPIER	23	0	0	0	3	0	0	1	0	0	0	14	0	0	1	0	20	5	1	1
K	A0A498LHT6	ADP ATP translocase 2	canonical	KGADIMYSGTIDCWRK	n[15]K[170]GADIMYSGTIDC[160]WRK	245	0	0	1	0	0	0	0	0	0	0	2	0	0	0	0	0	0	0	0
K	A0A498LHT6	ADP ATP translocase 2	canonical	KVFLDGVDKR	KVFLDGVDK[170]R	105	0	0	0	0	0	0	0	0	0	1	0	0	0	0	0	0	0	0	0
K	A0A498LHT6	ADP ATP translocase 2	canonical	SETAISFAKDFLAGGIAAAISK	n[43]SETAISFAK[170]DFLAGGIAAAISK	2, 10	0	0	2	0	0	0	0	0	0	0	6	0	0	2	0	20	2	0	12
K	A0A498LHT6	ADP ATP translocase 2	canonical	SETAISFAKDFLAGGIAAAISKTAVAPIER	n[43]SETAISFAKDFLAGGIAAAISK[170]TAVAPIER	2, 23	0	0	6	0	0	0	2	0	0	0	0	0	0	0	0	8	0	0	2
K	A0A498LHT6	ADP ATP translocase 2	canonical	VFLDGVDKR	VFLDGVDK[170]R	105	0	0	0	0	0	0	0	0	0	0	0	0	0	0	0	0	0	1	0
K	A0A498LHT6	ADP ATP translocase 2	canonical	VFLDGVDKR	VFLDGVDK[170]R[170]	105	0	0	0	0	0	0	0	0	0	1	0	0	0	0	0	1	1	0	0
K	A0A498LHT9	Beta-crystallin B1-like protein	canonical	KMEVSDEDIPSLWCYGFQDR	n[43]K[170]M[147]EVSDEDIPSLWC[160]YGFQDR	125	0	0	0	0	0	0	0	0	0	0	0	0	0	4	0	0	0	0	0
K	A0A498LHW4	Betaine--homocysteine S-methyltransferase 1	indistinguishable representative	ATGKPVAATLCIGPEGDMHGVTPGECAVR	ATGK[170]PVAATLC[160]IGPEGDMHGVTPGEC[160]AVR	225	0	0	0	0	0	0	0	0	0	0	0	0	0	0	0	6	0	0	0
K	A0A498LHW4	Betaine--homocysteine S-methyltransferase 1	indistinguishable representative	ATGKPVAATLCIGPEGDMHGVTPGECAVR	ATGK[170]PVAATLC[160]IGPEGDM[147]HGVTPGEC[160]AVR	225	0	0	0	0	0	0	0	0	0	0	0	0	0	0	0	1	0	0	0
K	A0A498LHW4	Betaine--homocysteine S-methyltransferase 1	indistinguishable representative	ATGKPVAATLCIGPEGDMHGVTPGECAVR	n[15]ATGK[170]PVAATLC[160]IGPEGDMHGVTPGEC[160]AVR	225	0	0	0	0	0	0	0	0	0	0	0	0	0	0	0	1	0	0	0
K	A0A498LHW4	Betaine--homocysteine S-methyltransferase 1	indistinguishable representative	EAYKAGIHYIGGCCGFEPYHIR	EAYK[170]AGIHYIGGC[160]C[160]GFEPYHIR	336	0	0	0	0	0	0	0	0	0	0	0	0	0	0	0	4	0	0	0
K	A0A498LHW4	Betaine--homocysteine S-methyltransferase 1	indistinguishable representative	EAYKAGIHYIGGCCGFEPYHIR	n[43]EAYK[170]AGIHYIGGC[160]C[160]GFEPYHIR	333, 336	0	0	0	0	0	0	0	0	2	0	0	0	0	0	0	0	0	0	0
K	A0A498LHW4	Betaine--homocysteine S-methyltransferase 1	indistinguishable representative	GHAELMQQKEATTAEQLRPLFEK	GHAELMQQK[170]EATTAEQLRPLFEK	432	0	0	0	0	0	0	0	0	0	0	0	0	0	0	0	3	0	0	1
K	A0A498LHW4	Betaine--homocysteine S-methyltransferase 1	indistinguishable representative	GHAELMQQKEATTAEQLRPLFEK	GHAELM[147]QQK[170]EATTAEQLRPLFEK	432	0	0	0	0	0	0	0	0	0	0	0	0	0	0	0	1	0	0	0
K	A0A498LHW4	Betaine--homocysteine S-methyltransferase 1	indistinguishable representative	GNKLTFTGQQINEAACDLAR	GNK[170]LTFTGQQINEAAC[160]DLAR	137	0	0	0	0	0	0	0	0	0	0	0	0	0	0	0	1	0	0	0
K	A0A498LHW4	Betaine--homocysteine S-methyltransferase 1	indistinguishable representative	GYVKAGPWTPEAAAEHPEAVR	GYVK[170]AGPWTPEAAAEHPEAVR	88	0	0	0	0	0	0	0	0	2	0	0	0	0	0	0	8	0	0	0
K	A0A498LHW4	Betaine--homocysteine S-methyltransferase 1	indistinguishable representative	GYVKAGPWTPEAAAEHPEAVR	GYVK[170]AGPW[202]TPEAAAEHPEAVR	88	0	0	0	0	0	0	0	0	0	0	0	0	0	0	0	1	0	0	0
K	A0A498LHW4	Betaine--homocysteine S-methyltransferase 1	indistinguishable representative	LVKAGADIVGVNCHFDPMTCVK	LVK[170]AGADIVGVNC[160]HFDPMTC[160]VK	253	0	0	0	0	0	0	0	0	1	0	0	0	0	0	0	2	0	0	0
K	A0A498LHY0	Myosin heavy fast skeletal muscle-like protein	subsumed	TLTVKEDDIHPMNPPKFDK	TLTVKEDDIHPMN[115]PPK[170]FDK	83	0	0	0	0	1	0	0	0	0	0	0	0	0	0	0	0	0	0	0
K	A0A498LHY8	Myosin heavy fast skeletal muscle-like protein	marginally distinguished	ADIAESQVNKLR	ADIAESQVN[115]K[170]LR	204, 268	0	0	6	0	0	0	0	0	0	0	0	0	0	0	0	0	0	0	0
K	A0A498LHY8	Myosin heavy fast skeletal muscle-like protein	marginally distinguished	LQDLVDKLQLKVK	LQDLVDKLQLK[170]VK	159	0	0	0	0	0	0	0	0	0	0	0	0	0	0	0	0	1	0	0
K	A0A498LHY8	Myosin heavy fast skeletal muscle-like protein	marginally distinguished	MQGSLEDQIVAANPLLEAYGNAKTVR	MQGSLEDQIVAANPLLEAYGNAK[170]TVR	36	4	0	0	0	3	0	0	0	0	0	0	0	0	0	0	0	0	0	0
K	A0A498LHY8	Myosin heavy fast skeletal muscle-like protein	marginally distinguished	MQGSLEDQIVAANPLLEAYGNAKTVR	MQGSLEDQIVAANPLLEAYGN[115]AK[170]TVR	36	2	0	1	0	1	0	0	0	0	0	0	0	0	0	0	0	0	0	0
K	A0A498LHY8	Myosin heavy fast skeletal muscle-like protein	marginally distinguished	MQGSLEDQIVAANPLLEAYGNAKTVR	MQGSLEDQIVAANPLLEAYGN[115]AK[170]TVR[170]	36	8	0	0	0	2	0	0	0	0	0	0	0	0	0	0	0	0	0	0
K	A0A498LHY8	Myosin heavy fast skeletal muscle-like protein	marginally distinguished	MQGSLEDQIVAANPLLEAYGNAKTVR	MQGSLEDQIVAAN[115]PLLEAYGN[115]AK[170]TVR[170]	36	4	0	0	0	1	0	0	0	0	0	0	0	0	0	0	0	0	0	0
K	A0A498LHY8	Myosin heavy fast skeletal muscle-like protein	marginally distinguished	MQGSLEDQIVAANPLLEAYGNAKTVR	M[147]QGSLEDQIVAANPLLEAYGNAK[170]TVR	36	0	0	1	0	0	0	0	0	0	0	0	0	0	0	0	0	0	0	0
K	A0A498LHY8	Myosin heavy fast skeletal muscle-like protein	marginally distinguished	MQGSLEDQIVAANPLLEAYGNAKTVR	M[147]QGSLEDQIVAANPLLEAYGN[115]AK[170]TVR	36	0	0	2	0	1	0	0	0	0	0	0	0	0	0	0	0	0	0	0
K	A0A498LHY8	Myosin heavy fast skeletal muscle-like protein	marginally distinguished	MQGSLEDQIVAANPLLEAYGNAKTVR	M[147]QGSLEDQIVAANPLLEAYGN[115]AK[170]TVR[170]	36	2	0	0	0	1	0	0	0	0	0	0	0	0	0	0	0	0	0	0
K	A0A498LHY8	Myosin heavy fast skeletal muscle-like protein	marginally distinguished	MQGSLEDQIVAANPLLEAYGNAKTVR	M[147]QGSLEDQIVAAN[115]PLLEAYGN[115]AK[170]TVR[170]	36	2	0	0	0	0	0	0	0	0	0	0	0	0	0	0	0	0	0	0
K	A0A498LI09	ATP synthase subunit gamma	canonical	LSSAGKEVMIVNVGDKLR	LSSAGK[170]EVMIVNVGDKLR	134	0	0	0	0	0	0	0	0	0	0	0	0	0	0	0	1	0	0	0
K	A0A498LI09	ATP synthase subunit gamma	canonical	SVISYKTDEKPLFSIDTVASSENMGIYDDIDADVLR	SVISYK[142]TDEK[170]PLFSIDTVASSENMGIYDDIDADVLR	209	0	0	0	0	0	0	0	0	0	0	0	0	0	0	0	0	0	1	0
K	A0A498LI09	ATP synthase subunit gamma	canonical	SVISYKTDEKPLFSIDTVASSENMGIYDDIDADVLR	SVISYK[170]TDEKPLFSIDTVASSENM[147]GIYDDIDADVLR	205	0	0	0	0	0	0	0	0	0	0	0	0	0	0	0	0	0	1	0
K	A0A498LI09	ATP synthase subunit gamma	canonical	TDEKPLFSIDTVASSENMGIYDDIDADVLR	TDEK[170]PLFSIDTVASSENM[147]GIYDDIDADVLR	209	0	0	0	0	0	0	0	0	0	0	0	0	0	0	0	1	0	0	0
K	A0A498LI09	ATP synthase subunit gamma	canonical	TDEKPLFSIDTVASSENMGIYDDIDADVLR	n[15]TDEK[170]PLFSIDTVASSEN[115]MGIYDDIDADVLR	209	0	0	0	0	0	0	0	0	0	0	0	0	0	0	0	1	0	0	0
K	A0A498LI10	ZP domain-containing protein	subsumed	MLGSLLREPWKSTQVSYGVQLPRPQLSPLSPSLAASSTQSK	n[43]MLGSLLREPWK[170]STQVSYGVQLPRPQLSPLSPSLAASSTQSK	1, 11	0	0	0	0	0	0	0	0	0	0	0	0	0	0	0	0	0	2	0
K	A0A498LI10	ZP domain-containing protein	subsumed	STQVSYGVQLPRPQLSPLSPSLAASSTQSKEELLGPVR	STQVSYGVQLPRPQLSPLSPSLAASSTQSK[170]EELLGPVR	41	0	0	0	0	0	0	0	0	0	0	0	0	0	0	0	0	0	4	0
K	A0A498LI11	Heat shock cognate 71 kDa	canonical	LDKSQVHDIVLVGGSTR	n[43]LDK[170]SQVHDIVLVGGSTR	326, 328	0	0	2	0	0	0	0	0	0	0	0	0	0	0	0	0	0	0	6
K	A0A498LI11	Heat shock cognate 71 kDa	canonical	LIGDAAKNQVAMNPTNTVFDAK	LIGDAAK[170]N[115]QVAMNPTNTVFDAK	56	0	0	0	0	0	0	0	0	0	0	1	0	0	2	0	0	0	0	3
K	A0A498LI11	Heat shock cognate 71 kDa	canonical	LIGDAAKNQVAMNPTNTVFDAKR	LIGDAAK[170]N[115]QVAMN[115]PTNTVFDAKR	56	0	0	1	0	0	0	0	0	0	0	0	0	0	0	0	0	0	0	0
K	A0A498LI11	Heat shock cognate 71 kDa	canonical	MVQEAEKYKAEDDVQR	MVQEAEK[170]YKAEDDVQR	524	0	0	0	0	0	0	0	0	0	0	0	0	0	0	0	0	0	0	1
K	A0A498LI11	Heat shock cognate 71 kDa	canonical	MVQEAEKYKAEDDVQR	n[15]MVQEAEK[170]YKAEDDVQR	524	0	0	1	0	0	0	0	0	0	0	0	0	0	0	0	1	0	0	0
K	A0A498LI11	Heat shock cognate 71 kDa	canonical	MVQEAEKYKAEDDVQR	n[43]MVQEAEK[170]YKAEDDVQR	518, 524	0	0	0	0	0	0	0	0	0	0	0	0	0	0	0	0	0	0	4
K	A0A498LI11	Heat shock cognate 71 kDa	canonical	NTTIPTKQTQTFTTYSDNQPGVLIQVYEGER	NTTIPTK[170]QTQTFTTYSDNQPGVLIQVYEGER	423	0	0	0	0	0	0	0	0	0	0	0	0	0	0	0	0	0	0	1
K	A0A498LI11	Heat shock cognate 71 kDa	canonical	QATKDAGTISGLNVLR	QATK[170]DAGTISGLNVLR	159	0	0	0	0	0	0	0	0	0	0	0	0	0	0	0	0	1	0	6
K	A0A498LI11	Heat shock cognate 71 kDa	canonical	QATKDAGTISGLNVLR	n[43]QATK[170]DAGTISGLNVLR	156, 159	0	0	0	0	0	0	0	0	0	0	0	0	0	0	0	0	0	0	2
K	A0A498LI11	Heat shock cognate 71 kDa	canonical	RFDDAVVQSDMK	RFDDAVVQSDM[147]K[170]	88	0	0	0	0	0	0	0	0	0	0	0	0	0	1	0	0	0	0	0
K	A0A498LI24	Histone H4	representative	DAVTYTEHAKR	DAVTYTEHAK[170]R	78	0	0	0	0	0	0	0	0	0	1	0	0	0	0	0	0	0	0	0
K	A0A498LI24	Histone H4	representative	DNIQGITKPAIR	DNIQGITK[170]PAIR	32	0	0	0	3	0	0	2	1	0	2	1	1	0	0	0	0	0	0	3
K	A0A498LI24	Histone H4	representative	DNIQGITKPAIR	DNIQGITK[170]PAIR[170]	32	0	2	0	0	0	0	0	0	0	0	0	0	0	0	0	0	0	0	0
K	A0A498LI24	Histone H4	representative	DNIQGITKPAIRR	DNIQGITK[170]PAIRR	32	0	0	0	0	0	0	0	0	0	1	0	0	0	0	0	0	0	0	0
K	A0A498LI24	Histone H4	representative	KTVTAMDVVYALKR	KTVTAMDVVYALK[170]R	92	0	0	0	0	0	0	0	0	0	1	0	0	0	0	0	0	2	0	0
K	A0A498LI24	Histone H4	representative	KTVTAMDVVYALKR	n[15]K[170]TVTAMDVVYALKR	80	0	0	0	4	1	0	2	0	0	8	0	0	0	0	0	0	4	0	1
K	A0A498LI24	Histone H4	representative	KTVTAMDVVYALKR	n[15]K[170]TVTAM[147]DVVYALKR	80	0	0	0	0	0	0	1	0	0	0	0	0	0	0	0	0	0	0	0
K	A0A498LI24	Histone H4	representative	TVTAMDVVYALKR	TVTAMDVVYALK[170]R	92	0	0	0	0	0	0	0	0	0	1	0	1	0	0	0	0	0	0	3
K	A0A498LI33	Rho GDP-dissociation inhibitor 1	canonical	IDKSDYMVGSYGPRPNEYEFLTPLEEAPK	n[43]IDK[170]SDYMVGSYGPRPNEYEFLTPLEEAPK	187, 189	0	0	0	0	0	0	0	0	0	0	0	0	0	0	0	0	0	0	2
K	A0A498LI33	Rho GDP-dissociation inhibitor 1	canonical	IDKSDYMVGSYGPRPNEYEFLTPLEEAPK	n[43]IDK[170]SDYMVGSYGPRPN[115]EYEFLTPLEEAPK	187, 189	0	0	0	0	0	0	0	0	0	0	0	0	0	0	0	0	0	0	2
K	A0A498LI33	Rho GDP-dissociation inhibitor 1	canonical	IDKSDYMVGSYGPRPNEYEFLTPLEEAPK	n[43]IDK[170]SDYM[147]VGSYGPRPNEYEFLTPLEEAPK	187, 189	0	0	0	0	0	0	0	0	0	0	0	0	0	0	0	0	0	0	2
K	A0A498LI33	Rho GDP-dissociation inhibitor 1	canonical	KYKEALLGTCNVVATDPNVPNVQVTR	KYK[170]EALLGTC[160]N[115]VVATDPNVPNVQVTR	70	0	0	0	0	0	0	0	0	0	0	0	0	0	0	0	0	0	0	2
K	A0A498LI33	Rho GDP-dissociation inhibitor 1	canonical	VNKEIVSGLKYVQQTFR	VNKEIVSGLK[170]YVQQTFR	175	0	0	0	0	0	0	0	0	0	0	0	0	0	0	0	0	0	0	1
K	A0A498LI59	Myosin heavy fast skeletal muscle-like protein	representative	ADIAESQVNKLR	ADIAESQVN[115]K[170]LR	156	0	0	3	0	0	0	0	0	0	0	0	0	0	0	0	0	0	0	0
K	A0A498LI59	Myosin heavy fast skeletal muscle-like protein	representative	LQDLVDKLQLKVK	LQDLVDKLQLK[170]VK	111	0	0	0	0	0	0	0	0	0	0	0	0	0	0	0	0	1	0	0
K	A0A498LIE2	Tubulin polymerization-promoting family member 3-like protein	canonical	SQEEAVQLLYGLIAGKEPANVGVTK	SQEEAVQLLYGLIAGK[142]EPAN[115]VGVTK[170]	133	0	0	0	0	0	0	1	0	0	0	0	0	0	0	0	0	0	0	0
K	A0A498LIE2	Tubulin polymerization-promoting family member 3-like protein	canonical	SQEEAVQLLYGLIAGKEPANVGVTKVAK	SQEEAVQLLYGLIAGKEPAN[115]VGVTK[142]VAK[170]	136	0	0	0	0	0	0	1	0	0	0	0	0	0	0	0	0	0	0	0
K	A0A498LIF3	Vimentin	subsumed	DSMLELKPVVENTFTKK	DSM[147]LELKPVVEN[115]TFTK[170]K	433	0	0	1	0	0	0	0	0	0	0	0	0	0	0	0	0	0	0	0
K	A0A498LIF3	Vimentin	subsumed	DSMLELKPVVENTFTKK	n[15]DSMLELK[170]PVVENTFTKK	424	0	0	0	0	0	0	1	0	0	0	0	0	0	0	0	0	0	0	0
K	A0A498LIF3	Vimentin	subsumed	FASYIEKVR	FASYIEK[170]VR	100	0	0	0	0	0	0	1	0	0	0	0	0	0	0	0	0	0	0	0
K	A0A498LIF3	Vimentin	subsumed	FLEQQNKILSAELEQLR	FLEQQN[115]K[170]ILSAELEQLR	109	0	0	1	0	0	0	0	0	0	0	0	0	0	0	0	0	0	0	0
K	A0A498LIF3	Vimentin	subsumed	FLEQQNKILSAELEQLRGQR	FLEQQN[115]K[170]ILSAELEQLRGQR	109	0	0	1	0	0	0	0	0	0	0	0	0	0	0	0	0	0	0	0
K	A0A498LIF3	Vimentin	subsumed	KVDSLQDELAFLK	n[15]K[170]VDSLQDELAFLK	216	0	0	0	0	0	0	0	0	0	0	0	1	0	0	0	0	0	0	0
K	A0A498LII5	Proteasome endopeptidase complex (EC 3.4.25.1)	canonical	TDDVSSILDWQKQQNQAEVAFSPAR	TDDVSSILDW[202]QK[170]QQNQAEVAFSPAR	82	0	0	0	0	0	0	0	0	0	0	0	0	0	0	0	0	1	0	0
K	A0A498LIJ3	Erythrocyte band 7 integral membrane-like protein	subsumed	ALKEASLVIAESPSALQLR	ALK[170]EASLVIAESPSALQLR	29	0	0	0	0	0	0	0	0	0	0	0	0	0	0	0	0	0	0	1
K	A0A498LIL1	Myosin light polypeptide 6-like isoform X2	canonical	VFDKEGNGTVMGAELR	VFDK[170]EGNGTVMGAELR	92	1	0	0	0	0	0	0	0	0	0	0	0	0	0	0	0	1	0	2
K	A0A498LIL1	Myosin light polypeptide 6-like isoform X2	canonical	VFDKEGNGTVMGAELR	VFDK[170]EGN[115]GTVMGAELR	92	0	0	0	0	0	0	0	0	0	0	0	0	0	0	0	0	1	0	1
K	A0A498LIL1	Myosin light polypeptide 6-like isoform X2	canonical	VFDKEGNGTVMGAELR	n[15]VFDK[170]EGN[115]GTVMGAELR	92	1	0	0	0	0	0	0	0	0	0	0	0	0	0	0	0	0	0	0
K	A0A498LIL1	Myosin light polypeptide 6-like isoform X2	canonical	VLGNPSNDDMNMK	VLGNPSNDDMN[115]MK[170]	57	0	0	0	1	0	0	0	0	0	0	0	0	0	0	0	0	0	0	0
K	A0A498LIL1	Myosin light polypeptide 6-like isoform X2	canonical	VLGNPSNDDMNMK	VLGNPSN[115]DDMNMK[170]	57	0	0	0	1	0	0	0	0	0	0	0	0	0	0	0	0	0	0	0
K	A0A498LIP3	EH domain-containing 1-like protein	canonical	FHDFHSPALEDADFDNKPMVLLVGQYSTGK	FHDFHSPALEDADFDNK[170]PM[147]VLLVGQYSTGK	57	0	0	0	0	0	0	0	0	0	1	0	0	0	0	0	0	0	0	0
K	A0A498LIQ9	Myosin-7-like protein	marginally distinguished	ADIAESQVNKLR	ADIAESQVN[115]K[170]LR	156	0	0	3	0	0	0	0	0	0	0	0	0	0	0	0	0	0	0	0
K	A0A498LIQ9	Myosin-7-like protein	marginally distinguished	LQDLVDKLQLKVK	LQDLVDKLQLK[170]VK	111	0	0	0	0	0	0	0	0	0	0	0	0	0	0	0	0	1	0	0
K	A0A498LIR9	Myosin heavy fast skeletal muscle-like protein	representative	ADIAESQVNKLR	ADIAESQVN[115]K[170]LR	373	0	0	3	0	0	0	0	0	0	0	0	0	0	0	0	0	0	0	0
K	A0A498LIR9	Myosin heavy fast skeletal muscle-like protein	representative	LQDLVDKLQLKVK	LQDLVDKLQLK[170]VK	328	0	0	0	0	0	0	0	0	0	0	0	0	0	0	0	0	1	0	0
K	A0A498LIR9	Myosin heavy fast skeletal muscle-like protein	representative	TLTVKEDDIHPMNPPKFDK	TLTVKEDDIHPMN[115]PPK[170]FDK	83	0	0	0	0	1	0	0	0	0	0	0	0	0	0	0	0	0	0	0
K	A0A498LIR9	Myosin heavy fast skeletal muscle-like protein	representative	TVNTKRVIQYFATVGAMSGPK	n[43]TVN[115]TK[170]RVIQYFATVGAMSGPK	185, 189	2	0	2	0	0	0	0	0	0	0	0	0	0	0	0	0	0	0	0
K	A0A498LIT6	Adenylate kinase 2, mitochondrial (AK 2) (EC 2.7.4.3) (ATP-AMP transphosphorylase 2) (ATP:AMP phosphotransferase) (Adenylate monophosphate kinase)	canonical	SYHEEFNPPKEPMKDDLTGEPLIR	SYHEEFNPPK[170]EPM[147]KDDLTGEPLIR	162	0	0	0	0	0	0	0	0	0	0	0	0	0	0	0	1	0	0	0
K	A0A498LIT6	Adenylate kinase 2, mitochondrial (AK 2) (EC 2.7.4.3) (ATP-AMP transphosphorylase 2) (ATP:AMP phosphotransferase) (Adenylate monophosphate kinase)	canonical	SYHEEFNPPKEPMKDDLTGEPLIR	SYHEEFN[115]PPK[142]EPMK[170]DDLTGEPLIR	166	0	0	0	0	0	0	0	0	0	0	0	0	0	0	0	1	0	0	0
K	A0A498LIW5	Alpha cardiac	representative	AVFPSIVGRPRHQGVMVGMGQKDSYVGDEAQSK	n[43]AVFPSIVGR[170]PRHQGVM[147]VGMGQK[170]DSYVGDEAQSK	31, 52	2	0	0	0	0	0	0	0	0	0	0	0	0	0	0	0	0	0	0
K	A0A498LIW5	Alpha cardiac	representative	CDIDIRKDLYANNVLSGGTTMYPGIADR	C[160]DIDIRK[170]DLYANNVLSGGTTMYPGIADR	293	0	0	0	0	0	0	0	1	0	0	0	0	0	0	0	0	0	0	0
K	A0A498LIW5	Alpha cardiac	representative	CDIDIRKDLYANNVLSGGTTMYPGIADR	C[160]DIDIR[170]K[170]DLYANNVLSGGTTMYPGIADR	293	0	0	0	1	0	0	0	0	0	1	0	0	0	0	0	0	0	0	0
K	A0A498LIW5	Alpha cardiac	representative	CDIDIRKDLYANNVLSGGTTMYPGIADR	C[160]DIDIR[170]K[170]DLYAN[115]NVLSGGTTMYPGIADR	293	0	0	0	5	2	0	0	1	0	0	0	0	0	0	0	0	0	0	0
K	A0A498LIW5	Alpha cardiac	representative	CPETLFQPSFIGMESAGIHETAYNSIMK	C[143]PETLFQPSFIGMESAGIHETAYNSIMK[170]	286	0	0	0	0	1	0	0	0	0	0	0	0	0	0	0	0	0	0	0
K	A0A498LIW5	Alpha cardiac	representative	CPETLFQPSFIGMESAGIHETAYNSIMK	C[143]PETLFQPSFIGMESAGIHETAYNSIM[147]K[170]	286	1	0	0	0	0	0	0	0	0	0	0	0	0	0	0	0	0	0	0
K	A0A498LIW5	Alpha cardiac	representative	CPETLFQPSFIGMESAGIHETAYNSIMK	C[143]PETLFQPSFIGMESAGIHETAYN[115]SIMK[170]	286	1	0	0	0	0	0	0	0	0	0	0	0	0	0	0	0	0	0	0
K	A0A498LIW5	Alpha cardiac	representative	CPETLFQPSFIGMESAGIHETAYNSIMK	C[143]PETLFQPSFIGM[147]ESAGIHETAYNSIMK[170]	286	0	0	0	0	3	0	0	0	0	0	0	0	0	0	0	0	0	0	0
K	A0A498LIW5	Alpha cardiac	representative	CPETLFQPSFIGMESAGIHETAYNSIMK	C[160]PETLFQPSFIGMESAGIHETAYNSIM[147]K[170]	286	1	0	0	0	0	0	0	0	0	0	0	0	0	0	0	0	0	0	0
K	A0A498LIW5	Alpha cardiac	representative	CPETLFQPSFIGMESAGIHETAYNSIMK	C[160]PETLFQPSFIGMESAGIHETAYN[115]SIMK[170]	286	5	0	0	0	4	0	0	0	0	0	0	0	0	0	0	0	0	0	0
K	A0A498LIW5	Alpha cardiac	representative	CPETLFQPSFIGMESAGIHETAYNSIMK	C[160]PETLFQPSFIGM[147]ESAGIHETAYNSIMK[170]	286	12	0	1	0	5	0	0	1	0	1	0	0	0	0	0	0	0	0	0
K	A0A498LIW5	Alpha cardiac	representative	CPETLFQPSFIGMESAGIHETAYNSIMK	C[160]PETLFQPSFIGM[147]ESAGIHETAYNSIM[147]K[170]	286	3	0	0	1	1	0	0	0	0	0	0	0	0	0	0	0	0	0	0
K	A0A498LIW5	Alpha cardiac	representative	CPETLFQPSFIGMESAGIHETAYNSIMK	C[160]PETLFQPSFIGM[147]ESAGIHETAYN[115]SIMK[170]	286	1	0	0	0	1	0	0	0	0	0	0	0	0	0	0	0	0	0	0
K	A0A498LIW5	Alpha cardiac	representative	CPETLFQPSFIGMESAGIHETAYNSIMK	n[43]C[160]PETLFQPSFIGM[147]ESAGIHETAYNSIMK[170]	259, 286	2	0	0	0	0	0	0	0	0	0	0	0	0	0	0	0	0	0	0
K	A0A498LIW5	Alpha cardiac	representative	DIKEKLCYVALDFENEMATAASSSSLEK	DIKEK[170]LC[160]YVALDFENEMATAASSSSLEK	217	0	0	0	0	0	0	0	1	0	0	0	0	0	0	0	0	0	0	0
K	A0A498LIW5	Alpha cardiac	representative	DIKEKLCYVALDFENEMATAASSSSLEK	DIK[170]EKLC[160]YVALDFENEMATAASSSSLEK	215	1	0	0	0	0	0	0	0	0	0	0	0	0	0	0	0	0	0	0
K	A0A498LIW5	Alpha cardiac	representative	DIKEKLCYVALDFENEMATAASSSSLEK	n[43]DIKEK[170]LC[160]YVALDFEN[115]EMATAASSSSLEK	213, 217	0	0	0	0	0	0	0	4	0	0	0	0	0	0	0	0	0	0	0
K	A0A498LIW5	Alpha cardiac	representative	DIKEKLCYVALDFENEMATAASSSSLEK	n[43]DIK[170]EKLC[160]YVALDFENEMATAASSSSLEK	213, 215	4	0	0	12	8	0	0	24	0	0	0	0	0	0	0	0	2	0	0
K	A0A498LIW5	Alpha cardiac	representative	DIKEKLCYVALDFENEMATAASSSSLEK	n[43]DIK[170]EKLC[160]YVALDFENEM[147]ATAASSSSLEK	213, 215	0	0	0	0	0	0	0	2	0	0	0	0	0	0	0	0	0	0	0
K	A0A498LIW5	Alpha cardiac	representative	DIKEKLCYVALDFENEMATAASSSSLEK	n[43]DIK[170]EKLC[160]YVALDFEN[115]EMATAASSSSLEK	213, 215	2	0	0	2	0	0	0	10	0	0	0	0	0	0	0	0	0	0	0
K	A0A498LIW5	Alpha cardiac	representative	DLTDYLMK	DLTDYLM[147]K[170]	193	0	0	0	3	0	0	0	5	0	0	0	0	0	0	0	0	0	0	0
K	A0A498LIW5	Alpha cardiac	representative	DLTDYLMKILTER	DLTDYLMK[170]ILTER	193	0	0	0	14	1	0	0	2	0	0	0	0	0	0	0	2	2	0	2
K	A0A498LIW5	Alpha cardiac	representative	DLTDYLMKILTER	DLTDYLM[147]K[170]ILTER	193	0	0	0	0	0	0	1	1	0	0	0	0	0	0	0	0	0	0	0
K	A0A498LIW5	Alpha cardiac	representative	DLTDYLMKILTER	n[43]DLTDYLMK[170]ILTER	186, 193	0	0	0	2	0	0	0	0	0	0	0	0	0	0	0	8	2	0	18
K	A0A498LIW5	Alpha cardiac	representative	DSYVGDEAQSKR	DSYVGDEAQSK[170]R	63	6	1	0	4	2	0	2	10	0	1	0	1	0	1	0	1	2	0	2
K	A0A498LIW5	Alpha cardiac	representative	DSYVGDEAQSKR	DSYVGDEAQSK[170]R[170]	63	0	1	0	0	0	0	3	0	0	0	0	0	0	0	0	0	0	0	0
K	A0A498LIW5	Alpha cardiac	representative	EITALAPSTMKIKIIAPPER	EITALAPSTMK[170]IKIIAPPER	328	0	0	0	0	0	0	0	0	0	0	0	0	0	0	0	0	0	0	1
K	A0A498LIW5	Alpha cardiac	representative	EKLCYVALDFENEMATAASSSSLEK	n[15]EK[170]LC[160]YVALDFENEMATAASSSSLEK	217	0	0	0	2	1	0	0	2	0	0	0	0	0	0	0	0	0	0	0
K	A0A498LIW5	Alpha cardiac	representative	EKLCYVALDFENEMATAASSSSLEK	n[15]EK[170]LC[160]YVALDFEN[115]EMATAASSSSLEK	217	6	0	0	2	0	0	0	1	0	0	0	0	0	0	0	0	0	0	0
K	A0A498LIW5	Alpha cardiac	representative	EKLCYVALDFENEMATAASSSSLEK	n[43]E[111]K[170]LC[160]YVALDFEN[115]EMATAASSSSLEK	216, 217	0	0	0	0	6	0	0	0	0	0	0	0	0	0	0	0	0	0	0
K	A0A498LIW5	Alpha cardiac	representative	FRCPETLFQPSFIGMESAGIHETAYNSIMK	FRC[160]PETLFQPSFIGMESAGIHETAYNSIM[147]K[170]	286	18	0	1	0	3	0	0	2	0	0	0	0	0	0	0	0	0	0	0
K	A0A498LIW5	Alpha cardiac	representative	FRCPETLFQPSFIGMESAGIHETAYNSIMK	FRC[160]PETLFQPSFIGMESAGIHETAYN[115]SIMK[170]	286	1	0	0	0	1	0	0	0	0	0	0	0	0	0	0	0	0	0	0
K	A0A498LIW5	Alpha cardiac	representative	FRCPETLFQPSFIGMESAGIHETAYNSIMK	FRC[160]PETLFQPSFIGMESAGIHETAYN[115]SIM[147]K[170]	286	4	0	0	0	1	0	0	0	0	0	0	0	0	0	0	0	0	0	0
K	A0A498LIW5	Alpha cardiac	representative	FRCPETLFQPSFIGMESAGIHETAYNSIMK	FRC[160]PETLFQPSFIGM[147]ESAGIHETAYNSIMK[170]	286	18	0	0	0	3	0	0	0	0	0	0	0	0	0	0	0	0	0	0
K	A0A498LIW5	Alpha cardiac	representative	FRCPETLFQPSFIGMESAGIHETAYNSIMK	FRC[160]PETLFQPSFIGM[147]ESAGIHETAYNSIM[147]K[170]	286	1	0	0	2	1	0	0	2	0	2	0	0	0	0	0	0	0	0	0
K	A0A498LIW5	Alpha cardiac	representative	FRCPETLFQPSFIGMESAGIHETAYNSIMK	FRC[160]PETLFQPSFIGM[147]ESAGIHETAYN[115]SIMK[170]	286	8	0	0	0	1	0	0	0	0	0	0	0	0	0	0	0	0	0	0
K	A0A498LIW5	Alpha cardiac	representative	FRCPETLFQPSFIGMESAGIHETAYNSIMK	n[15]FRC[160]PETLFQPSFIGMESAGIHETAYNSIM[147]K[170]	286	0	0	0	0	1	0	0	0	0	0	0	0	0	0	0	0	0	0	0
K	A0A498LIW5	Alpha cardiac	representative	FRCPETLFQPSFIGMESAGIHETAYNSIMK	n[15]FRC[160]PETLFQPSFIGM[147]ESAGIHETAYNSIMK[170]	286	0	0	0	0	1	0	0	0	0	0	0	0	0	0	0	0	0	0	0
K	A0A498LIW5	Alpha cardiac	representative	FRCPETLFQPSFIGMESAGIHETAYNSIMK	n[15]FRC[160]PETLFQPSFIGM[147]ESAGIHETAYNSIM[147]K[170]	286	1	0	0	0	0	0	0	0	0	0	0	0	0	0	0	0	0	0	0
K	A0A498LIW5	Alpha cardiac	representative	FRCPETLFQPSFIGMESAGIHETAYNSIMK	n[15]FRC[160]PETLFQPSFIGM[147]ESAGIHETAYN[115]SIMK[170]	286	0	0	0	0	1	0	0	0	0	0	0	0	0	0	0	0	0	0	0
K	A0A498LIW5	Alpha cardiac	representative	FRCPETLFQPSFIGMESAGIHETAYNSIMKCDIDIR	FRC[160]PETLFQPSFIGMESAGIHETAYNSIM[147]K[170]C[160]DIDIR	286	1	0	0	0	0	0	0	0	0	0	0	0	0	0	0	0	0	0	0
K	A0A498LIW5	Alpha cardiac	representative	GILTLKYPIEHGIITNWDDMEK	GILTLK[170]YPIEHGIITNWDDMEK	70	0	0	0	0	0	0	0	0	0	0	0	0	0	0	0	0	1	0	2
K	A0A498LIW5	Alpha cardiac	representative	GILTLKYPIEHGIITNWDDMEKIWHHTFYNELR	GILTLK[170]YPIEHGIITNW[202]DDMEKIWHHTFYNELR	70	0	0	0	0	0	0	1	0	0	0	0	0	0	0	0	0	0	0	0
K	A0A498LIW5	Alpha cardiac	representative	HQGVMVGMGQK	HQGVMVGM[147]GQK[170]	52	0	0	0	0	1	0	0	4	0	0	0	0	0	0	0	0	0	0	0
K	A0A498LIW5	Alpha cardiac	representative	HQGVMVGMGQK	HQGVM[147]VGMGQK[170]	52	0	0	0	1	3	0	0	2	0	0	0	0	0	0	0	0	0	0	0
K	A0A498LIW5	Alpha cardiac	representative	HQGVMVGMGQKDSYVGDEAQSK	HQGVMVGMGQK[170]DSYVGDEAQSK	52	14	1	12	0	9	0	1	23	1	2	5	0	0	7	0	10	16	2	32
K	A0A498LIW5	Alpha cardiac	representative	HQGVMVGMGQKDSYVGDEAQSK	HQGVMVGMGQK[170]DS[167]Y[243]VGDEAQSK	52	0	0	1	0	0	0	0	0	0	0	0	0	0	0	0	0	0	0	0
K	A0A498LIW5	Alpha cardiac	representative	HQGVMVGMGQKDSYVGDEAQSK	HQGVMVGM[147]GQK[170]DSYVGDEAQSK	52	11	0	4	3	3	0	0	11	1	0	6	0	0	1	0	1	1	0	13
K	A0A498LIW5	Alpha cardiac	representative	HQGVMVGMGQKDSYVGDEAQSK	HQGVM[147]VGMGQK[170]DSYVGDEAQSK	52	1	0	6	1	6	0	0	4	1	0	6	0	0	0	0	4	1	0	9
K	A0A498LIW5	Alpha cardiac	representative	HQGVMVGMGQKDSYVGDEAQSK	HQGVM[147]VGM[147]GQK[170]DSYVGDEAQSK	52	0	0	2	0	5	0	1	12	0	0	0	0	0	0	0	1	1	0	3
K	A0A498LIW5	Alpha cardiac	representative	HQGVMVGMGQKDSYVGDEAQSK	n[15]HQGVMVGMGQK[170]DSYVGDEAQSK	52	1	0	0	1	2	0	0	5	0	0	0	0	0	0	0	0	0	0	0
K	A0A498LIW5	Alpha cardiac	representative	HQGVMVGMGQKDSYVGDEAQSK	n[15]HQGVMVGM[147]GQK[170]DSYVGDEAQSK	52	0	0	0	0	0	0	0	3	0	0	0	0	0	0	0	0	0	0	0
K	A0A498LIW5	Alpha cardiac	representative	HQGVMVGMGQKDSYVGDEAQSK	n[15]HQGVM[147]VGMGQK[170]DSYVGDEAQSK	52	1	0	0	0	1	0	0	5	0	0	0	0	0	0	0	0	0	0	0
K	A0A498LIW5	Alpha cardiac	representative	HQGVMVGMGQKDSYVGDEAQSK	n[43]HQGVMVGMGQK[142]DSYVGDEAQSK[170]	42, 63	0	0	0	0	2	0	0	0	0	0	0	0	0	0	0	0	0	0	0
K	A0A498LIW5	Alpha cardiac	representative	HQGVMVGMGQKDSYVGDEAQSK	n[43]HQGVMVGMGQK[170]DSYVGDEAQSK	42, 52	2	0	0	0	0	0	0	0	0	0	0	0	0	0	0	0	0	0	0
K	A0A498LIW5	Alpha cardiac	representative	HQGVMVGMGQKDSYVGDEAQSK	n[43]HQGVMVGM[147]GQK[170]DSYVGDEAQSK	42, 52	0	0	0	0	2	0	0	2	0	0	0	0	0	0	0	0	0	0	0
K	A0A498LIW5	Alpha cardiac	representative	HQGVMVGMGQKDSYVGDEAQSK	n[43]HQGVM[147]VGMGQK[170]DSYVGDEAQSK	42, 52	8	0	6	0	4	0	0	6	0	0	0	0	0	2	0	2	2	0	22
K	A0A498LIW5	Alpha cardiac	representative	HQGVMVGMGQKDSYVGDEAQSK	n[43]HQGVM[147]VGM[147]GQK[170]DSYVGDEAQSK	42, 52	0	0	2	0	0	0	0	2	0	0	0	0	0	0	0	0	0	0	8
K	A0A498LIW5	Alpha cardiac	representative	HQGVMVGMGQKDSYVGDEAQSKR	HQGVMVGMGQKDSYVGDEAQSK[170]R	63	0	0	3	0	0	0	0	0	0	0	0	0	0	0	0	0	0	0	0
K	A0A498LIW5	Alpha cardiac	representative	HQGVMVGMGQKDSYVGDEAQSKR	HQGVMVGMGQKDSYVGDEAQSK[170]R[170]	63	0	0	0	1	0	0	0	0	0	0	0	0	0	0	0	0	0	0	0
K	A0A498LIW5	Alpha cardiac	representative	HQGVMVGMGQKDSYVGDEAQSKR	HQGVMVGMGQK[142]DSYVGDEAQSK[170]R	63	0	0	0	0	0	0	0	1	0	0	0	0	0	0	0	0	0	0	0
K	A0A498LIW5	Alpha cardiac	representative	HQGVMVGMGQKDSYVGDEAQSKR	HQGVMVGMGQK[170]DSYVGDEAQSKR	52	21	0	19	7	6	0	8	22	2	1	19	0	0	6	0	14	18	1	50
K	A0A498LIW5	Alpha cardiac	representative	HQGVMVGMGQKDSYVGDEAQSKR	HQGVMVGMGQK[170]DSYVGDEAQSK[170]R	52, 63	0	0	4	0	0	0	0	0	0	0	0	0	0	0	0	0	0	0	28
K	A0A498LIW5	Alpha cardiac	representative	HQGVMVGMGQKDSYVGDEAQSKR	HQGVMVGMGQK[170]DSYVGDEAQSK[170]R[170]	52, 63	0	0	0	0	0	0	0	4	0	0	0	0	0	0	0	0	0	0	0
K	A0A498LIW5	Alpha cardiac	representative	HQGVMVGMGQKDSYVGDEAQSKR	HQGVMVGM[147]GQKDSYVGDEAQSK[170]R	63	0	0	1	0	0	0	0	0	0	0	0	0	0	0	0	0	0	0	0
K	A0A498LIW5	Alpha cardiac	representative	HQGVMVGMGQKDSYVGDEAQSKR	HQGVMVGM[147]GQK[170]DSYVGDEAQSKR	52	20	0	12	8	9	0	8	16	0	1	1	0	0	2	0	3	2	1	24
K	A0A498LIW5	Alpha cardiac	representative	HQGVMVGMGQKDSYVGDEAQSKR	HQGVM[147]VGMGQK[170]DSYVGDEAQSKR	52	0	0	13	5	11	0	5	21	1	2	8	0	0	4	0	11	5	0	25
K	A0A498LIW5	Alpha cardiac	representative	HQGVMVGMGQKDSYVGDEAQSKR	HQGVM[147]VGMGQK[170]DSYVGDEAQSK[170]R	52, 63	0	0	0	0	0	0	0	0	0	0	0	0	0	0	0	0	0	0	6
K	A0A498LIW5	Alpha cardiac	representative	HQGVMVGMGQKDSYVGDEAQSKR	HQGVM[147]VGM[147]GQKDSYVGDEAQSK[170]R	63	0	0	2	0	0	0	0	0	0	0	0	0	0	0	0	0	0	0	0
K	A0A498LIW5	Alpha cardiac	representative	HQGVMVGMGQKDSYVGDEAQSKR	HQGVM[147]VGM[147]GQK[170]DSYVGDEAQSKR	52	2	0	10	1	1	0	4	2	0	0	0	0	0	9	0	3	4	0	7
K	A0A498LIW5	Alpha cardiac	representative	HQGVMVGMGQKDSYVGDEAQSKR	HQGVM[147]VGM[147]GQK[170]DSYVGDEAQSK[170]R	52, 63	0	0	4	0	0	0	0	0	0	0	0	0	0	0	0	0	0	0	0
K	A0A498LIW5	Alpha cardiac	representative	HQGVMVGMGQKDSYVGDEAQSKR	n[15]HQGVMVGMGQK[170]DSYVGDEAQSKR	52	12	0	8	17	12	0	9	15	0	11	4	0	0	0	0	2	3	2	4
K	A0A498LIW5	Alpha cardiac	representative	HQGVMVGMGQKDSYVGDEAQSKR	n[15]HQGVMVGM[147]GQK[170]DSYVGDEAQSKR	52	2	0	1	0	0	0	0	3	0	0	0	0	0	0	0	1	0	0	0
K	A0A498LIW5	Alpha cardiac	representative	HQGVMVGMGQKDSYVGDEAQSKR	n[15]HQGVM[147]VGMGQK[170]DSYVGDEAQSKR	52	2	0	2	1	1	0	2	4	0	5	0	0	0	0	0	0	0	1	1
K	A0A498LIW5	Alpha cardiac	representative	HQGVMVGMGQKDSYVGDEAQSKR	n[43]HQGVMVGMGQK[142]DSYVGDEAQSK[170]R	42, 63	2	0	0	0	0	0	0	0	0	0	0	0	0	0	0	0	0	0	0
K	A0A498LIW5	Alpha cardiac	representative	HQGVMVGMGQKDSYVGDEAQSKR	n[43]HQGVMVGM[147]GQK[170]DSYVGDEAQSKR	42, 52	2	0	4	0	0	0	0	2	0	0	0	0	0	0	0	0	0	0	6
K	A0A498LIW5	Alpha cardiac	representative	HQGVMVGMGQKDSYVGDEAQSKR	n[43]HQGVM[147]VGMGQK[170]DSYVGDEAQSKR	42, 52	4	0	20	4	0	0	8	10	0	2	6	0	0	10	0	10	2	0	56
K	A0A498LIW5	Alpha cardiac	representative	HQGVMVGMGQKDSYVGDEAQSKR	n[43]HQGVM[147]VGM[147]GQK[170]DSYVGDEAQSKR	42, 52	0	0	26	12	0	0	4	12	0	0	0	0	0	22	0	6	2	0	38
K	A0A498LIW5	Alpha cardiac	representative	HQGVMVGMGQKDSYVGDEAQSKR	n[43]HQGVM[147]VGM[147]GQK[170]DS[167]YVGDEAQSKR	42, 52	0	0	0	2	0	0	0	0	0	0	0	0	0	0	0	0	0	0	0
K	A0A498LIW5	Alpha cardiac	representative	IKIIAPPERK	IK[170]IIAPPERK	330	0	0	0	1	0	0	0	0	0	0	0	0	0	0	0	0	0	0	0
K	A0A498LIW5	Alpha cardiac	representative	LCYVALDFENEMATAASSSSLEK	LC[160]YVALDFENEM[147]ATAASSSSLEK[170]	240	1	0	0	2	0	0	0	0	0	0	0	0	0	0	0	0	0	0	0
K	A0A498LIW5	Alpha cardiac	representative	LCYVALDFENEMATAASSSSLEK	n[43]LC[160]YVALDFENEMATAASSSSLEK[170]	218, 240	0	0	0	0	0	0	0	2	0	0	0	0	0	0	0	0	0	0	0
K	A0A498LIW5	Alpha cardiac	representative	LCYVALDFENEMATAASSSSLEK	n[43]LC[160]YVALDFENEM[147]ATAASSSSLEK[170]	218, 240	0	0	0	2	4	0	0	0	0	0	0	0	0	0	0	0	0	0	0
K	A0A498LIW5	Alpha cardiac	representative	LCYVALDFENEMATAASSSSLEKSYELPDGQVITIGNER	LC[160]YVALDFENEMATAASSSSLEK[170]SYELPDGQVITIGNER	240	0	0	0	0	0	0	0	5	0	0	0	0	0	0	0	0	0	0	0
K	A0A498LIW5	Alpha cardiac	representative	LCYVALDFENEMATAASSSSLEKSYELPDGQVITIGNER	LC[160]YVALDFEN[115]EMATAASSSSLEK[170]SYELPDGQVITIGN[115]ER	240	0	0	0	0	0	0	0	1	0	0	0	0	0	0	0	0	0	0	0
K	A0A498LIW5	Alpha cardiac	representative	LDLAGRDLTDYLMKILTER	LDLAGRDLTDYLMK[170]ILTER	193	0	0	2	0	0	0	0	1	0	0	0	0	0	0	0	0	0	0	0
K	A0A498LIW5	Alpha cardiac	representative	LDLAGRDLTDYLMKILTER	LDLAGRDLTDYLM[147]K[170]ILTER	193	0	0	0	0	0	0	0	1	0	0	0	0	0	0	0	0	0	0	0
K	A0A498LIW5	Alpha cardiac	representative	MQKEITALAPSTMK	MQKEITALAPSTM[147]K[170]	328	0	0	0	1	1	0	0	0	0	0	0	0	0	0	0	0	0	0	0
K	A0A498LIW5	Alpha cardiac	representative	MQKEITALAPSTMK	MQK[170]EITALAPSTMK	317	9	0	2	6	3	0	0	8	0	3	0	0	0	0	0	0	10	0	9
K	A0A498LIW5	Alpha cardiac	representative	MQKEITALAPSTMK	MQK[170]EITALAPSTM[147]K	317	0	0	0	0	0	0	0	0	0	0	0	0	0	0	0	0	2	0	7
K	A0A498LIW5	Alpha cardiac	representative	MQKEITALAPSTMK	M[147]QK[170]EITALAPSTMK	317	0	0	0	0	2	0	0	0	0	0	0	0	0	0	0	0	3	0	7
K	A0A498LIW5	Alpha cardiac	representative	MQKEITALAPSTMK	M[147]QK[170]EITALAPSTM[147]K	317	0	0	0	0	0	0	0	1	0	0	0	0	0	0	0	0	0	0	2
K	A0A498LIW5	Alpha cardiac	representative	MQKEITALAPSTMK	n[15]MQK[170]EITALAPSTMK	317	1	0	0	0	2	0	0	0	0	1	0	0	0	0	0	0	0	0	0
K	A0A498LIW5	Alpha cardiac	representative	MQKEITALAPSTMK	n[15]MQK[170]EITALAPSTM[147]K	317	1	0	0	2	1	0	0	0	0	0	0	0	0	0	0	0	0	0	0
K	A0A498LIW5	Alpha cardiac	representative	MQKEITALAPSTMK	n[43]MQK[170]EITALAPSTMK	315, 317	4	0	0	0	0	0	0	0	0	0	0	0	0	0	0	0	0	0	6
K	A0A498LIW5	Alpha cardiac	representative	MQKEITALAPSTMK	n[43]M[147]QK[170]EITALAPSTMK	315, 317	8	0	4	0	4	0	0	0	0	0	0	0	0	0	0	0	0	0	4
K	A0A498LIW5	Alpha cardiac	representative	VAPEEHPTLLTEAPLNPKANR	VAPEEHPTLLTEAPLNPK[170]ANR	115	8	0	0	6	3	0	0	3	0	0	0	0	0	0	0	0	0	0	0
K	A0A498LIW5	Alpha cardiac	representative	VAPEEHPTLLTEAPLNPKANR	VAPEEHPTLLTEAPLNPK[170]AN[115]R	115	6	0	4	5	3	0	0	8	0	1	0	0	0	3	0	2	9	0	18
K	A0A498LIW5	Alpha cardiac	representative	VAPEEHPTLLTEAPLNPKANR	VAPEEHPTLLTEAPLNPK[170]AN[115]R[170]	115	10	0	1	5	2	0	0	12	0	0	0	0	0	0	0	0	1	0	0
K	A0A498LIW5	Alpha cardiac	representative	VAPEEHPTLLTEAPLNPKANR	VAPEEHPTLLTEAPLN[115]PK[170]ANR	115	0	0	0	0	0	0	0	0	0	0	0	0	0	0	0	0	1	0	1
K	A0A498LIW5	Alpha cardiac	representative	VAPEEHPTLLTEAPLNPKANREK	VAPEEHPTLLTEAPLNPK[170]AN[115]REK	115	0	0	0	0	0	0	0	2	0	0	0	0	0	0	0	0	0	0	0
K	A0A498LIW5	Alpha cardiac	representative	VAPEEHPTLLTEAPLNPKANREK	VAPEEHPTLLTEAPLNPK[170]AN[115]REK[142]	115	1	0	0	0	0	0	0	0	0	0	0	0	0	0	0	0	0	0	0
K	A0A498LIW5	Alpha cardiac	representative	VAPEEHPTLLTEAPLNPKANREK	VAPEEHPTLLTEAPLNPK[170]AN[115]R[170]EK	115	1	0	0	0	0	0	0	0	0	0	0	0	0	0	0	0	0	0	0
K	A0A498LIW5	Alpha cardiac	representative	YPIEHGIITNWDDMEKIWHHTFYNELR	YPIEHGIITNWDDMEK[170]IWHHTFYNELR	86	0	0	2	0	0	0	3	0	0	0	0	0	0	0	0	0	0	0	0
K	A0A498LIW5	Alpha cardiac	representative	YPIEHGIITNWDDMEKIWHHTFYNELR	YPIEHGIITNWDDMEK[170]IW[202]HHTFYNELR	86	0	0	1	0	0	0	3	0	0	0	1	0	0	0	0	1	0	1	0
K	A0A498LIW5	Alpha cardiac	representative	YPIEHGIITNWDDMEKIWHHTFYNELR	YPIEHGIITNWDDM[147]EK[170]IWHHTFYNELR	86	0	0	0	0	0	0	1	0	0	0	0	0	0	0	0	0	0	0	0
K	A0A498LIW5	Alpha cardiac	representative	YPIEHGIITNWDDMEKIWHHTFYNELR	YPIEHGIITNW[202]DDMEK[170]IWHHTFYNELR	86	0	0	0	0	0	0	1	0	0	7	0	0	0	0	0	1	0	0	1
K	A0A498LIW5	Alpha cardiac	representative	YPIEHGIITNWDDMEKIWHHTFYNELR	YPIEHGIITN[115]WDDMEK[170]IW[202]HHTFYNELR	86	0	0	0	0	0	0	1	0	0	0	0	0	0	0	0	0	0	1	0
K	A0A498LIW5	Alpha cardiac	representative	YPIEHGIITNWDDMEKIWHHTFYNELR	n[15]YPIEHGIITNWDDMEK[170]IWHHTFYNELR	86	0	0	0	0	1	0	0	0	0	14	0	0	0	0	0	0	0	0	0
K	A0A498LIW5	Alpha cardiac	representative	YPIEHGIITNWDDMEKIWHHTFYNELR	n[15]YPIEHGIITNWDDMEK[170]IWHHTFYN[115]ELR	86	0	0	0	0	0	0	0	0	0	1	0	0	0	0	0	0	0	0	0
K	A0A498LIW5	Alpha cardiac	representative	YPIEHGIITNWDDMEKIWHHTFYNELR	n[15]YPIEHGIITNW[202]DDMEK[170]IWHHTFYNELR	86	0	0	0	0	0	0	0	0	0	1	0	0	0	0	0	0	0	0	0
K	A0A498LIW5	Alpha cardiac	representative	YPIEHGIITNWDDMEKIWHHTFYNELR	n[15]YPIEHGIITN[115]WDDMEK[170]IWHHTFYNELR	86	0	0	0	0	0	0	0	0	0	3	0	0	0	0	0	0	0	0	0
K	A0A498LIW5	Alpha cardiac	representative	YPIEHGIITNWDDMEKIWHHTFYNELR	n[43]YPIEHGIITNWDDMEK[170]IWHHTFYNELR	71, 86	0	0	0	0	0	0	0	0	0	2	0	0	0	0	0	0	0	0	0
K	A0A498LIY8	ADP ATP translocase 2	representative	AFFKGAWSNVLR	AFFK[170]GAWSNVLR	272	0	0	0	0	0	0	0	0	0	0	0	0	0	0	0	1	0	0	0
K	A0A498LIY8	ADP ATP translocase 2	representative	DEGGKAFFKGAWSNVLR	DEGGKAFFK[170]GAWSNVLR	272	0	0	1	0	0	0	0	0	0	0	1	0	0	0	0	2	0	0	0
K	A0A498LIY8	ADP ATP translocase 2	representative	DFLAGGIAAAISKTAVAPIER	DFLAGGIAAAISK[170]TAVAPIER	23	0	0	0	3	0	0	1	0	0	0	14	0	0	1	0	20	5	1	1
K	A0A498LIY8	ADP ATP translocase 2	representative	KGADIMYSGTIDCWRK	n[15]K[170]GADIMYSGTIDC[160]WRK	245	0	0	1	0	0	0	0	0	0	0	2	0	0	0	0	0	0	0	0
K	A0A498LIY8	ADP ATP translocase 2	representative	SETAISFAKDFLAGGIAAAISK	n[43]SETAISFAK[170]DFLAGGIAAAISK	2, 10	0	0	2	0	0	0	0	0	0	0	6	0	0	2	0	20	2	0	12
K	A0A498LIY8	ADP ATP translocase 2	representative	SETAISFAKDFLAGGIAAAISKTAVAPIER	n[43]SETAISFAKDFLAGGIAAAISK[170]TAVAPIER	2, 23	0	0	6	0	0	0	2	0	0	0	0	0	0	0	0	8	0	0	2
K	A0A498LJ11	Guanylate cyclase soluble subunit beta-1	canonical	FMEVMGINMVKR	FMEVMGIN[115]MVK[170]R[170]	1197	0	0	0	1	0	0	0	0	0	0	0	0	0	0	0	0	0	0	0
K	A0A498LJ11	Guanylate cyclase soluble subunit beta-1	canonical	KDNGKVLTTTR	KDNGK[170]VLTTTR	1270	0	0	0	1	0	0	0	0	0	0	0	0	0	0	0	0	0	0	0
K	A0A498LJ11	Guanylate cyclase soluble subunit beta-1	canonical	KIIGDELVQSYSYEGCEAKR	KIIGDELVQSYSYEGC[160]EAK[170]R	1295	0	0	0	2	0	0	0	0	0	0	0	0	0	0	0	0	0	0	0
K	A0A498LJ11	Guanylate cyclase soluble subunit beta-1	canonical	KIIGDELVQSYSYEGCEAKR	n[15]K[170]IIGDELVQSYSYEGC[160]EAKR	1277	0	0	0	2	0	0	0	0	0	0	0	0	0	0	0	0	0	0	0
K	A0A498LJ34	SH3 domain-binding glutamic acid-rich-like protein	canonical	QQQDVMGFLAANKIEFEECDIAADEDNRK	QQQDVM[147]GFLAANK[170]IEFEEC[160]DIAADEDNRK	31	0	0	0	1	0	0	0	0	0	0	0	0	0	0	0	0	0	0	0
K	A0A498LJ34	SH3 domain-binding glutamic acid-rich-like protein	canonical	QQQDVMGFLAANKIEFEECDIAADEDNRK	Q[111]QQDVM[147]GFLAANK[170]IEFEEC[160]DIAADEDNRK	31	0	0	0	1	0	0	0	0	0	0	0	0	0	0	0	0	0	0	0
K	A0A498LJ34	SH3 domain-binding glutamic acid-rich-like protein	canonical	QQQDVMGFLAANKIEFEECDIAADEDNRK	n[15]QQQDVMGFLAAN[115]K[170]IEFEEC[160]DIAADEDNRK	31	0	0	0	1	0	0	0	0	0	0	0	0	0	0	0	0	0	0	0
K	A0A498LJ34	SH3 domain-binding glutamic acid-rich-like protein	canonical	QQQDVMGFLAANKIEFEECDIAADEDNRK	n[15]QQ[111]QDVM[147]GFLAANK[170]IEFEEC[160]DIAADEDNRK	31	0	0	0	0	0	0	0	0	0	1	0	0	0	0	0	0	0	0	0
K	A0A498LJ34	SH3 domain-binding glutamic acid-rich-like protein	canonical	QQQDVMGFLAANKIEFEECDIAADEDNRK	n[15]Q[111]QQDVMGFLAAN[115]K[170]IEFEEC[160]DIAADEDNRK	31	0	0	0	0	0	0	0	1	0	0	0	0	0	0	0	0	0	0	0
K	A0A498LJ34	SH3 domain-binding glutamic acid-rich-like protein	canonical	VIKVYIASSSGSTSIK	VIK[170]VYIASSSGSTSIK	4	0	0	0	0	0	0	0	0	0	0	0	0	0	0	0	0	0	0	1
K	A0A498LJ34	SH3 domain-binding glutamic acid-rich-like protein	canonical	VIKVYIASSSGSTSIKK	n[43]VIK[170]VYIASSSGSTSIKK	2, 4	0	0	0	0	0	0	0	0	0	0	0	0	0	0	0	0	0	0	2
K	A0A498LJ52	Lectin-like protein	representative	EKAPGAHLVSVHNKK	EKAPGAHLVSVHN[115]K[170]K	216	0	0	0	0	0	0	1	0	0	0	0	0	0	0	0	0	0	0	0
K	A0A498LJB6	Beta-enolase	canonical	AGAAEKGVPLYR	AGAAEK[170]GVPLYR	223	0	0	0	0	0	0	0	0	0	0	0	0	0	0	0	1	0	0	0
K	A0A498LJB6	Beta-enolase	canonical	AKYGKDATNVGDEGGFAPNILENNEALELLK	n[15]AK[170]YGKDATN[115]VGDEGGFAPNILENNEALELLK	296	2	0	0	0	0	0	0	0	0	0	0	0	0	0	0	1	0	0	0
K	A0A498LJB6	Beta-enolase	canonical	AKYGKDATNVGDEGGFAPNILENNEALELLK	n[15]AK[170]YGKDATN[115]VGDEGGFAPN[115]ILENNEALELLK	296	0	0	0	0	0	0	0	0	0	0	0	0	0	0	0	1	0	0	0
K	A0A498LJB6	Beta-enolase	canonical	AVDHVNKEIAPK	AVDHVN[115]K[170]EIAPK	168	0	0	0	0	0	0	0	0	0	0	0	0	0	0	0	4	0	0	3
K	A0A498LJB6	Beta-enolase	canonical	AVDHVNKEIAPK	n[43]AVDHVNK[170]EIAPK	162, 168	0	0	0	0	0	0	0	0	0	0	0	0	0	0	0	2	0	0	0
K	A0A498LJB6	Beta-enolase	canonical	AVDHVNKEIAPKLIEK	AVDHVNKEIAPK[170]LIEK	173	0	0	0	0	1	0	0	0	0	0	0	0	0	0	0	0	0	0	0
K	A0A498LJB6	Beta-enolase	canonical	DATNVGDEGGFAPNILENNEALELLKSAIEK	DATNVGDEGGFAPNILEN[115]NEALELLK[170]SAIEK	325	0	0	0	0	0	0	0	0	0	0	0	0	0	0	0	0	0	0	1
K	A0A498LJB6	Beta-enolase	canonical	FSVVEQEKIDKFMLELDGTENK	FSVVEQEKIDK[170]FMLELDGTENK	189	0	0	0	0	0	0	0	0	0	0	0	0	0	0	0	1	0	0	0
K	A0A498LJB6	Beta-enolase	canonical	FSVVEQEKIDKFMLELDGTENK	FSVVEQEK[142]IDK[170]FMLELDGTENK	189	1	0	0	0	0	0	0	0	0	0	0	0	0	0	0	0	0	0	0
K	A0A498LJB6	Beta-enolase	canonical	FSVVEQEKIDKFMLELDGTENK	FSVVEQEK[170]IDKFM[147]LELDGTENK	186	1	0	0	0	0	0	0	0	0	0	0	0	0	0	0	0	0	0	0
K	A0A498LJB6	Beta-enolase	canonical	FSVVEQEKIDKFMLELDGTENK	FSVVEQEK[170]IDK[142]FMLELDGTENK	186	1	0	0	0	0	0	0	0	0	0	0	0	0	0	0	0	0	0	0
K	A0A498LJB6	Beta-enolase	canonical	FSVVEQEKIDKFMLELDGTENK	n[43]FSVVEQEK[170]IDKFMLELDGTENK	179, 186	2	0	0	0	0	0	0	0	0	0	0	0	0	0	0	0	0	0	2
K	A0A498LJB6	Beta-enolase	canonical	FTGSVDIQVVGDDLTVTNPKR	FTGSVDIQVVGDDLTVTN[115]PK[170]R	377	0	0	1	0	0	0	0	0	0	0	0	0	0	0	0	0	0	0	0
K	A0A498LJB6	Beta-enolase	canonical	GTQKAVDHVNK	GTQK[170]AVDHVNK	161	0	0	0	0	0	0	0	0	0	0	0	0	0	0	0	1	0	0	0
K	A0A498LJB6	Beta-enolase	canonical	GTQKAVDHVNKEIAPK	n[43]GTQK[170]AVDHVNKEIAPK	158, 161	0	0	0	0	0	0	0	0	0	0	0	0	0	0	0	0	0	0	2
K	A0A498LJB6	Beta-enolase	canonical	HIADLAGNKDVILPVPAFNVINGGSHAGNK	HIADLAGNKDVILPVPAFNVIN[115]GGSHAGNK[170]	259	1	0	0	0	0	0	0	0	0	0	0	0	0	0	0	0	0	0	0
K	A0A498LJB6	Beta-enolase	canonical	HIADLAGNKDVILPVPAFNVINGGSHAGNK	HIADLAGNK[170]DVILPVPAFNVINGGSHAGNK	238	1	0	0	0	0	0	0	0	0	0	0	0	0	0	0	0	0	0	0
K	A0A498LJB6	Beta-enolase	canonical	HIADLAGNKDVILPVPAFNVINGGSHAGNK	HIADLAGN[115]K[170]DVILPVPAFNVINGGSHAGNK	238	1	0	0	0	1	0	0	0	0	0	0	0	0	0	0	0	0	0	0
K	A0A498LJB6	Beta-enolase	canonical	HIADLAGNKDVILPVPAFNVINGGSHAGNK	HIADLAGN[115]K[170]DVILPVPAFNVIN[115]GGSHAGNK	238	4	0	3	0	5	0	0	0	2	0	0	0	0	0	0	11	1	0	3
K	A0A498LJB6	Beta-enolase	canonical	HIADLAGNKDVILPVPAFNVINGGSHAGNK	HIADLAGN[115]K[170]DVILPVPAFN[115]VIN[115]GGSHAGNK	238	0	0	0	0	0	0	0	0	0	0	0	0	0	0	0	2	0	0	0
K	A0A498LJB6	Beta-enolase	canonical	HIADLAGNKDVILPVPAFNVINGGSHAGNK	n[15]HIADLAGN[115]K[170]DVILPVPAFNVINGGSHAGNK	238	2	0	0	0	1	0	0	0	0	0	0	0	0	0	0	0	0	0	0
K	A0A498LJB6	Beta-enolase	canonical	HIADLAGNKDVILPVPAFNVINGGSHAGNK	n[15]HIADLAGN[115]K[170]DVILPVPAFNVIN[115]GGSHAGNK	238	8	0	0	0	4	0	0	0	0	0	0	0	0	0	1	9	0	0	0
K	A0A498LJB6	Beta-enolase	canonical	HIADLAGNKDVILPVPAFNVINGGSHAGNK	n[15]HIADLAGN[115]K[170]DVILPVPAFN[115]VIN[115]GGSHAGNK	238	0	0	0	0	2	0	0	1	0	0	0	0	0	0	0	1	0	0	0
K	A0A498LJB6	Beta-enolase	canonical	HIADLAGNKDVILPVPAFNVINGGSHAGNK	n[43]HIADLAGN[115]K[170]DVILPVPAFNVIN[115]GGSHAGNK	230, 238	0	0	2	0	2	0	0	0	0	0	0	0	0	0	0	0	0	0	0
K	A0A498LJB6	Beta-enolase	canonical	HIADLAGNKDVILPVPAFNVINGGSHAGNKLAMQEFMILPVGAK	HIADLAGNKDVILPVPAFN[115]VINGGSHAGN[115]K[170]LAMQEFMILPVGAK	259	0	0	0	0	0	0	0	0	0	0	0	0	0	0	0	1	0	0	0
K	A0A498LJB6	Beta-enolase	canonical	HIADLAGNKDVILPVPAFNVINGGSHAGNKLAMQEFMILPVGAK	HIADLAGNKDVILPVPAFN[115]VIN[115]GGSHAGNK[170]LAMQEFMILPVGAK	259	0	0	0	0	0	0	0	0	0	0	0	0	0	0	0	0	1	0	0
K	A0A498LJB6	Beta-enolase	canonical	IDKFMLELDGTENKSK	n[15]IDK[170]FMLELDGTENKSK	189	2	0	0	0	0	0	0	0	0	0	0	0	0	0	0	0	0	0	0
K	A0A498LJB6	Beta-enolase	canonical	IGAEVYHNLKNVIK	IGAEVYHNLK[170]N[115]VIK	290	0	0	2	0	1	0	0	0	0	0	1	0	0	1	0	1	0	0	2
K	A0A498LJB6	Beta-enolase	canonical	IGAEVYHNLKNVIK	IGAEVYHN[115]LK[170]NVIK	290	0	0	0	0	0	0	0	0	1	0	0	0	0	0	0	0	0	0	0
K	A0A498LJB6	Beta-enolase	canonical	IGAEVYHNLKNVIK	IGAEVYHN[115]LK[170]NVIK[142]	290	0	0	0	0	1	0	0	0	0	0	0	0	0	0	0	0	0	0	0
K	A0A498LJB6	Beta-enolase	canonical	LAMQEFMILPVGAKNFHEAMR	LAMQEFMILPVGAK[170]N[115]FHEAMR	273	1	0	1	0	0	0	0	0	0	0	0	0	0	0	0	1	0	0	0
K	A0A498LJB6	Beta-enolase	canonical	LAMQEFMILPVGAKNFHEAMR	LAMQEFMILPVGAK[170]N[115]FHEAMR[170]	273	1	0	0	0	0	0	0	0	0	0	0	0	0	0	0	0	0	0	0
K	A0A498LJB6	Beta-enolase	canonical	LAMQEFMILPVGAKNFHEAMR	LAM[147]QEFM[147]ILPVGAK[170]N[115]FHEAM[147]R	273	0	0	3	0	0	0	0	0	0	0	0	0	0	0	0	0	0	0	0
K	A0A498LJB6	Beta-enolase	canonical	SGETEDTFIADLVVGLCTGQIKTGAPCR	SGETEDTFIADLVVGLC[160]TGQIK[170]TGAPC[160]R	445	2	0	2	0	1	0	0	0	0	0	0	0	0	0	0	0	0	0	0
K	A0A498LJB6	Beta-enolase	canonical	VNQIGSVTESIQACKLAQSNGWGVMVSHR	VNQIGSVTESIQAC[160]K[170]LAQSNGWGVMVSHR	409	1	0	0	0	0	0	0	0	0	0	0	0	0	0	0	0	0	0	0
K	A0A498LJB6	Beta-enolase	canonical	VNQIGSVTESIQACKLAQSNGWGVMVSHR	VNQIGSVTESIQAC[160]K[170]LAQSNGW[202]GVMVSHR	409	3	0	0	0	0	0	0	0	0	0	0	0	0	0	0	0	0	0	0
K	A0A498LJB6	Beta-enolase	canonical	YGKDATNVGDEGGFAPNILENNEALELLKSAIEK	YGKDATNVGDEGGFAPN[115]ILENNEALELLK[170]SAIEK	325	0	0	1	0	0	0	0	0	0	0	0	0	0	0	0	0	0	0	0
K	A0A498LJB9	Myosin heavy fast skeletal muscle-like protein	subsumed	ADIAESQVNKLR	ADIAESQVN[115]K[170]LR	156	0	0	3	0	0	0	0	0	0	0	0	0	0	0	0	0	0	0	0
K	A0A498LJB9	Myosin heavy fast skeletal muscle-like protein	subsumed	LQDLVDKLQLKVK	LQDLVDKLQLK[170]VK	111	0	0	0	0	0	0	0	0	0	0	0	0	0	0	0	0	1	0	0
K	A0A498LJK1	Glutathione S-transferase Mu 3-like protein	subsumed	MFDAACLDDYKNLR	MFDAAC[160]LDDYK[170]NLR	146	0	0	0	0	0	0	0	0	0	0	0	0	0	1	0	0	0	0	0
K	A0A498LJL1	Histone H2B	marginally distinguished	HAVSEGTKAVTK	HAVSEGTK[170]AVTK	115	0	0	0	0	0	0	0	0	0	0	0	0	0	0	0	0	3	0	1
K	A0A498LJL1	Histone H2B	marginally distinguished	HAVSEGTKAVTKYTSSK	HAVSEGTKAVTK[170]YTSSK	119	0	0	1	0	0	0	0	0	0	0	0	0	0	0	0	0	0	0	1
K	A0A498LJL1	Histone H2B	marginally distinguished	HAVSEGTKAVTKYTSSK	HAVSEGTK[170]AVTKYTSSK	115	0	0	0	0	0	0	0	0	0	0	0	0	0	0	0	0	0	0	3
K	A0A498LJL1	Histone H2B	marginally distinguished	HAVSEGTKAVTKYTSSK	n[43]HAVSEGTKAVTK[170]YTSSK	108, 119	0	0	0	0	0	0	0	0	0	0	0	0	0	0	0	0	0	0	2
K	A0A498LJL1	Histone H2B	marginally distinguished	KESYAIYVYK	n[15]K[170]ESYAIYVYK	33	0	1	0	0	0	0	0	0	0	0	0	0	0	0	1	0	0	0	0
K	A0A498LJL1	Histone H2B	marginally distinguished	LLLPGELAKHAVSEGTK	LLLPGELAK[170]HAVSEGTK	107	0	0	0	0	0	0	0	0	0	0	1	1	0	0	0	2	2	0	2
K	A0A498LJL1	Histone H2B	marginally distinguished	LLLPGELAKHAVSEGTKAVTK	LLLPGELAK[170]HAVSEGTKAVTK	107	0	0	0	0	0	0	0	0	0	0	0	0	0	0	0	0	0	0	1
K	A0A498LJL1	Histone H2B	marginally distinguished	QVHPDTGISSKAMGIMNSFVNDIFER	QVHPDTGISSK[170]AMGIMNSFVNDIFER	56	0	0	0	0	0	0	0	0	0	0	0	0	0	0	0	0	0	0	1
K	A0A498LJL1	Histone H2B	marginally distinguished	QVHPDTGISSKAMGIMNSFVNDIFER	QVHPDTGISSK[170]AMGIMN[115]SFVNDIFER	56	0	0	0	0	0	0	0	0	0	0	0	0	0	0	0	0	1	0	0
K	A0A498LJL1	Histone H2B	marginally distinguished	QVHPDTGISSKAMGIMNSFVNDIFER	QVHPDTGISSK[170]AM[147]GIMNSFVNDIFER	56	0	0	0	0	0	0	0	0	0	0	0	0	0	0	0	1	0	0	0
K	A0A498LJL1	Histone H2B	marginally distinguished	QVHPDTGISSKAMGIMNSFVNDIFER	Q[111]VHPDTGISSK[170]AMGIMNSFVNDIFER	56	0	0	0	0	0	0	0	0	0	0	0	0	0	0	0	0	0	0	1
K	A0A498LJL1	Histone H2B	marginally distinguished	QVHPDTGISSKAMGIMNSFVNDIFER	Q[111]VHPDTGISSK[170]AM[147]GIMN[115]SFVNDIFER	56	0	0	0	0	0	0	0	0	0	0	0	0	0	0	0	0	0	0	1
K	A0A498LJL1	Histone H2B	marginally distinguished	VLKQVHPDTGISSK	VLK[170]QVHPDTGISSK	45	0	0	0	2	0	0	0	0	1	0	0	3	0	2	0	0	6	0	4
K	A0A498LJL1	Histone H2B	marginally distinguished	VLKQVHPDTGISSK	n[43]VLK[170]QVHPDTGISSK	43, 45	0	0	2	0	0	0	0	0	0	4	2	0	0	0	0	2	8	0	8
K	A0A498LJP3	Profilin	canonical	DAHGGKVNPPVFDMTTYLR	DAHGGK[170]VNPPVFDMTTYLR	133	0	0	0	0	0	0	0	0	0	0	0	0	0	0	0	0	0	0	1
K	A0A498LJP3	Profilin	canonical	DAHGGKVNPPVFDMTTYLR	DAHGGK[170]VN[115]PPVFDMTTYLR	133	0	0	0	0	0	0	0	0	0	0	0	0	0	0	0	0	0	0	2
K	A0A498LJP3	Profilin	canonical	DAHGGKVNPPVFDMTTYLR	DAHGGK[170]VN[115]PPVFDM[147]TTYLR	133	0	0	0	0	0	0	0	0	0	0	0	0	0	0	0	0	0	0	1
K	A0A498LJP3	Profilin	canonical	DALNVDGQNTMDIK	DALNVDGQN[115]TMDIK[170]	98	0	0	0	2	0	0	2	1	1	0	0	0	0	0	0	0	0	0	0
K	A0A498LJP3	Profilin	canonical	GVKDAHGGKVNPPVFDMTTYLR	GVKDAHGGK[170]VN[115]PPVFDMTTYLR	133	0	0	2	0	0	0	0	0	0	0	0	0	0	0	0	0	0	0	8
K	A0A498LJP3	Profilin	canonical	GVKDAHGGKVNPPVFDMTTYLR	GVK[142]DAHGGK[170]VN[115]PPVFDMTTYLR	133	0	0	0	0	0	0	0	0	0	2	0	0	0	0	0	0	0	0	0
K	A0A498LJP3	Profilin	canonical	GVKDAHGGKVNPPVFDMTTYLR	GVK[170]DAHGGKVN[115]PPVFDMTTYLR	127	0	0	0	0	0	0	0	0	0	0	0	0	0	1	0	0	0	0	2
K	A0A498LJP3	Profilin	canonical	GVKDAHGGKVNPPVFDMTTYLR	GVK[170]DAHGGK[142]VN[115]PPVFDMTTYLR	127	0	0	0	0	0	0	1	0	0	0	0	0	0	0	0	0	0	0	0
K	A0A498LJP3	Profilin	canonical	GVKDAHGGKVNPPVFDMTTYLR	n[43]GVK[142]DAHGGK[170]VN[115]PPVFDMTTYLR	125, 133	0	0	0	0	0	0	0	0	0	2	0	0	0	0	0	0	0	0	2
K	A0A498LJP3	Profilin	canonical	GVKDAHGGKVNPPVFDMTTYLR	n[43]GVK[170]DAHGGKVN[115]PPVFDMTTYLR	125, 127	0	0	0	0	0	0	0	0	0	2	0	0	0	0	0	0	0	0	0
K	A0A498LJP3	Profilin	canonical	MKTSDKEPDPFSFTIGR	n[43]MKTSDK[170]EPDPFSFTIGR	99, 104	0	0	0	0	0	0	0	0	0	0	0	0	0	0	0	0	0	0	2
K	A0A498LJP3	Profilin	canonical	MKTSDKEPDPFSFTIGR	n[43]MK[170]TSDKEPDPFSFTIGR	99, 100	0	0	0	0	0	0	0	0	0	0	0	0	0	0	0	0	0	0	2
K	A0A498LJP3	Profilin	canonical	MKTSDKEPDPFSFTIGR	n[43]M[147]KTSDK[170]EPDPFSFTIGR	99, 104	0	0	0	0	0	0	0	0	0	0	0	0	0	0	0	0	0	0	2
K	A0A498LJP3	Profilin	canonical	SHQAIIIAKGVKDAHGGK	SHQAIIIAK[170]GVKDAHGGK	124	0	0	0	0	0	0	0	0	0	0	0	0	0	0	0	0	0	0	1
K	A0A498LJP3	Profilin	canonical	SHQAIIIAKGVKDAHGGK	SHQAIIIAK[170]GVK[170]DAHGGK	124, 127	0	0	0	0	0	0	0	0	0	0	0	0	0	0	0	0	0	0	2
K	A0A498LJP3	Profilin	canonical	TSDKEPDPFSFTIGR	TSDK[170]EPDPFSFTIGR	104	0	0	0	0	0	0	0	0	0	0	0	0	0	0	0	0	0	0	1
K	A0A498LJP4	Carboxymethylenebutenolidase-like protein	canonical	KREDINPDDKPYIEEAR	KREDINPDDK[170]PYIEEAR	230	0	0	0	0	0	0	0	0	0	0	0	0	0	0	0	1	0	0	0
K	A0A498LJT3	ERGIC-53	canonical	QLATGQQQGNVGGLGSYETVQHFNDIKEHLHVVKR	QLATGQQQGNVGGLGSYETVQHFN[115]DIK[170]EHLHVVKR	356	0	0	0	0	0	0	0	0	0	0	0	0	0	0	0	1	0	0	0
K	A0A498LJU3	60S ribosomal L7	canonical	KVGNYYVPAEPK	n[15]K[170]VGN[115]YYVPAEPK	75	0	0	0	0	0	0	0	0	0	0	0	0	0	0	0	1	0	0	0
K	A0A498LK03	ATP1B4-like isoform X2	canonical	IDDLKTYLWNAETK	IDDLK[170]TYLWNAETK	42	0	0	0	0	0	0	0	0	0	0	1	0	0	0	0	0	0	0	0
K	A0A498LK06	Histone H2B	subsumed	KESYAIYVYK	n[15]K[170]ESYAIYVYK	33	0	1	0	0	0	0	0	0	0	0	0	0	0	0	1	0	0	0	0
K	A0A498LK06	Histone H2B	subsumed	QVHPDTGISSKAMGIMNSFVNDIFER	QVHPDTGISSK[170]AMGIMNSFVNDIFER	56	0	0	0	0	0	0	0	0	0	0	0	0	0	0	0	0	0	0	1
K	A0A498LK06	Histone H2B	subsumed	QVHPDTGISSKAMGIMNSFVNDIFER	QVHPDTGISSK[170]AMGIMN[115]SFVNDIFER	56	0	0	0	0	0	0	0	0	0	0	0	0	0	0	0	0	1	0	0
K	A0A498LK06	Histone H2B	subsumed	QVHPDTGISSKAMGIMNSFVNDIFER	QVHPDTGISSK[170]AM[147]GIMNSFVNDIFER	56	0	0	0	0	0	0	0	0	0	0	0	0	0	0	0	1	0	0	0
K	A0A498LK06	Histone H2B	subsumed	QVHPDTGISSKAMGIMNSFVNDIFER	Q[111]VHPDTGISSK[170]AMGIMNSFVNDIFER	56	0	0	0	0	0	0	0	0	0	0	0	0	0	0	0	0	0	0	1
K	A0A498LK06	Histone H2B	subsumed	QVHPDTGISSKAMGIMNSFVNDIFER	Q[111]VHPDTGISSK[170]AM[147]GIMN[115]SFVNDIFER	56	0	0	0	0	0	0	0	0	0	0	0	0	0	0	0	0	0	0	1
K	A0A498LK06	Histone H2B	subsumed	VLKQVHPDTGISSK	VLK[170]QVHPDTGISSK	45	0	0	0	2	0	0	0	0	1	0	0	3	0	2	0	0	6	0	4
K	A0A498LK06	Histone H2B	subsumed	VLKQVHPDTGISSK	n[43]VLK[170]QVHPDTGISSK	43, 45	0	0	2	0	0	0	0	0	0	4	2	0	0	0	0	2	8	0	8
K	A0A498LKD5	Non-specific serine/threonine protein kinase (EC 2.7.11.1)	marginally distinguished	KAEQDVFQVEKTCNYDQWAPR	KAEQDVFQVEK[170]TC[160]NYDQWAPR	1385	0	0	0	0	0	0	0	0	0	0	0	0	0	0	0	0	0	1	0
K	A0A498LKK6	Myosin heavy fast skeletal muscle-like protein	subsumed	IEDMAMMTHLNEPCVLYNLKER	IEDMAMMTHLNEPC[160]VLYN[115]LK[170]ER	106	0	0	0	0	1	0	0	0	0	0	0	0	0	0	0	0	0	0	0
K	A0A498LKK6	Myosin heavy fast skeletal muscle-like protein	subsumed	MQGSLEDQIVAANPLLEAYGNAKTVR	MQGSLEDQIVAANPLLEAYGNAK[170]TVR	236	4	0	0	0	3	0	0	0	0	0	0	0	0	0	0	0	0	0	0
K	A0A498LKK6	Myosin heavy fast skeletal muscle-like protein	subsumed	MQGSLEDQIVAANPLLEAYGNAKTVR	MQGSLEDQIVAANPLLEAYGN[115]AK[170]TVR	236	2	0	1	0	1	0	0	0	0	0	0	0	0	0	0	0	0	0	0
K	A0A498LKK6	Myosin heavy fast skeletal muscle-like protein	subsumed	MQGSLEDQIVAANPLLEAYGNAKTVR	MQGSLEDQIVAANPLLEAYGN[115]AK[170]TVR[170]	236	8	0	0	0	2	0	0	0	0	0	0	0	0	0	0	0	0	0	0
K	A0A498LKK6	Myosin heavy fast skeletal muscle-like protein	subsumed	MQGSLEDQIVAANPLLEAYGNAKTVR	MQGSLEDQIVAAN[115]PLLEAYGN[115]AK[170]TVR[170]	236	4	0	0	0	1	0	0	0	0	0	0	0	0	0	0	0	0	0	0
K	A0A498LKK6	Myosin heavy fast skeletal muscle-like protein	subsumed	MQGSLEDQIVAANPLLEAYGNAKTVR	M[147]QGSLEDQIVAANPLLEAYGNAK[170]TVR	236	0	0	1	0	0	0	0	0	0	0	0	0	0	0	0	0	0	0	0
K	A0A498LKK6	Myosin heavy fast skeletal muscle-like protein	subsumed	MQGSLEDQIVAANPLLEAYGNAKTVR	M[147]QGSLEDQIVAANPLLEAYGN[115]AK[170]TVR	236	0	0	2	0	1	0	0	0	0	0	0	0	0	0	0	0	0	0	0
K	A0A498LKK6	Myosin heavy fast skeletal muscle-like protein	subsumed	MQGSLEDQIVAANPLLEAYGNAKTVR	M[147]QGSLEDQIVAANPLLEAYGN[115]AK[170]TVR[170]	236	2	0	0	0	1	0	0	0	0	0	0	0	0	0	0	0	0	0	0
K	A0A498LKK6	Myosin heavy fast skeletal muscle-like protein	subsumed	MQGSLEDQIVAANPLLEAYGNAKTVR	M[147]QGSLEDQIVAAN[115]PLLEAYGN[115]AK[170]TVR[170]	236	2	0	0	0	0	0	0	0	0	0	0	0	0	0	0	0	0	0	0
K	A0A498LKK6	Myosin heavy fast skeletal muscle-like protein	subsumed	TLTVKEDDIHPMNPPKFDK	TLTVKEDDIHPMN[115]PPK[170]FDK	83	0	0	0	0	1	0	0	0	0	0	0	0	0	0	0	0	0	0	0
K	A0A498LKK6	Myosin heavy fast skeletal muscle-like protein	subsumed	TVNTKRVIQYFATVGAMSGPK	n[43]TVN[115]TK[170]RVIQYFATVGAMSGPK	185, 189	2	0	2	0	0	0	0	0	0	0	0	0	0	0	0	0	0	0	0
K	A0A498LKP6	ES1 mitochondrial	canonical	DGKDCKLNNDVER	DGK[170]DC[160]KLNNDVER	122	0	0	1	0	0	0	0	0	0	0	0	0	0	0	0	0	0	0	0
K	A0A498LKP6	ES1 mitochondrial	canonical	FSHGQGMMQMNDLSKLDVNSFDAVIFPGGHGIVK	FSHGQGMMQMNDLSK[170]LDVNSFDAVIFPGGHGIVK	93	0	0	2	0	0	0	0	0	0	0	0	0	0	0	0	0	0	0	0
K	A0A498LKP6	ES1 mitochondrial	canonical	FSHGQGMMQMNDLSKLDVNSFDAVIFPGGHGIVK	FSHGQGMMQMNDLSK[170]LDVN[115]SFDAVIFPGGHGIVK	93	0	0	1	0	0	0	0	0	0	0	0	0	0	0	0	0	0	0	0
K	A0A498LKP6	ES1 mitochondrial	canonical	FSHGQGMMQMNDLSKLDVNSFDAVIFPGGHGIVK	FSHGQGMMQMN[115]DLSK[170]LDVNSFDAVIFPGGHGIVK	93	0	0	1	0	0	0	0	0	0	0	0	0	0	0	0	0	0	0	0
K	A0A498LKP6	ES1 mitochondrial	canonical	FSHGQGMMQMNDLSKLDVNSFDAVIFPGGHGIVK	FSHGQGMMQMN[115]DLSK[170]LDVN[115]SFDAVIFPGGHGIVK	93	0	0	2	0	0	0	0	0	0	0	0	0	0	0	0	0	0	0	0
K	A0A498LKP6	ES1 mitochondrial	canonical	FSHGQGMMQMNDLSKLDVNSFDAVIFPGGHGIVK	FSHGQGMMQM[147]NDLSK[170]LDVNSFDAVIFPGGHGIVK	93	0	0	3	0	0	0	0	0	0	0	0	0	0	0	0	0	0	0	0
K	A0A498LKP6	ES1 mitochondrial	canonical	FSHGQGMMQMNDLSKLDVNSFDAVIFPGGHGIVK	FSHGQGMMQM[147]NDLSK[170]LDVN[115]SFDAVIFPGGHGIVK	93	0	0	3	0	0	0	0	0	0	0	0	0	0	0	0	0	0	0	0
K	A0A498LKP6	ES1 mitochondrial	canonical	FSHGQGMMQMNDLSKLDVNSFDAVIFPGGHGIVK	FSHGQGMMQM[147]N[115]DLSK[170]LDVNSFDAVIFPGGHGIVK	93	0	0	2	0	0	0	0	0	0	0	0	0	0	0	0	0	0	0	0
K	A0A498LKP6	ES1 mitochondrial	canonical	FSHGQGMMQMNDLSKLDVNSFDAVIFPGGHGIVK	FSHGQGMMQM[147]N[115]DLSK[170]LDVN[115]SFDAVIFPGGHGIVK	93	0	0	1	0	0	0	0	0	0	0	0	0	0	0	0	0	0	0	0
K	A0A498LKP6	ES1 mitochondrial	canonical	FSHGQGMMQMNDLSKLDVNSFDAVIFPGGHGIVK	FSHGQGMM[147]QMNDLSK[170]LDVNSFDAVIFPGGHGIVK	93	0	0	1	0	0	0	0	0	0	0	0	0	0	0	0	0	0	0	0
K	A0A498LKP6	ES1 mitochondrial	canonical	FSHGQGMMQMNDLSKLDVNSFDAVIFPGGHGIVK	FSHGQGMM[147]QMNDLSK[170]LDVN[115]SFDAVIFPGGHGIVK	93	0	0	1	0	0	0	0	0	0	0	0	0	0	0	0	0	0	0	0
K	A0A498LKP6	ES1 mitochondrial	canonical	FSHGQGMMQMNDLSKLDVNSFDAVIFPGGHGIVK	FSHGQGMM[147]QMN[115]DLSK[170]LDVNSFDAVIFPGGHGIVK	93	0	0	1	0	0	0	0	0	0	0	0	0	0	0	0	0	0	0	0
K	A0A498LKP6	ES1 mitochondrial	canonical	FSHGQGMMQMNDLSKLDVNSFDAVIFPGGHGIVK	FSHGQGM[147]MQMNDLSK[170]LDVNSFDAVIFPGGHGIVK	93	0	0	2	0	0	0	0	0	0	0	0	0	0	0	0	0	0	0	0
K	A0A498LKP6	ES1 mitochondrial	canonical	FSHGQGMMQMNDLSKLDVNSFDAVIFPGGHGIVK	FSHGQGM[147]MQMN[115]DLSK[170]LDVN[115]SFDAVIFPGGHGIVK	93	0	0	2	0	0	0	0	0	0	0	0	0	0	0	0	0	0	0	0
K	A0A498LKP6	ES1 mitochondrial	canonical	FSHGQGMMQMNDLSKLDVNSFDAVIFPGGHGIVK	n[15]FSHGQGMMQMN[115]DLSK[170]LDVNSFDAVIFPGGHGIVK	93	0	0	2	0	0	0	0	0	0	0	0	0	0	0	0	0	0	0	0
K	A0A498LKP6	ES1 mitochondrial	canonical	FSHGQGMMQMNDLSKLDVNSFDAVIFPGGHGIVK	n[15]FSHGQGMMQM[147]NDLSK[170]LDVNSFDAVIFPGGHGIVK	93	0	0	1	0	0	0	0	0	0	0	0	0	0	0	0	0	0	0	0
K	A0A498LKP6	ES1 mitochondrial	canonical	FSHGQGMMQMNDLSKLDVNSFDAVIFPGGHGIVKNLSTFSK	FSHGQGMMQMNDLSKLDVNSFDAVIFPGGHGIVK[170]NLSTFSK	112	0	0	2	0	0	0	0	0	0	0	0	0	0	0	0	0	0	0	0
K	A0A498LKP6	ES1 mitochondrial	canonical	FSHGQGMMQMNDLSKLDVNSFDAVIFPGGHGIVKNLSTFSK	FSHGQGMMQMNDLSKLDVNSFDAVIFPGGHGIVK[170]N[115]LSTFSK	112	0	0	2	0	0	0	0	0	0	0	0	0	0	0	0	0	0	0	0
K	A0A498LKP6	ES1 mitochondrial	canonical	FSHGQGMMQMNDLSKLDVNSFDAVIFPGGHGIVKNLSTFSK	FSHGQGMMQMNDLSKLDVN[115]SFDAVIFPGGHGIVK[170]N[115]LSTFSK	112	0	0	1	0	0	0	0	0	0	0	0	0	0	0	0	0	0	0	0
K	A0A498LKP6	ES1 mitochondrial	canonical	FSHGQGMMQMNDLSKLDVNSFDAVIFPGGHGIVKNLSTFSK	FSHGQGMMQMN[115]DLSKLDVNSFDAVIFPGGHGIVK[170]NLSTFSK	112	0	0	2	0	0	0	0	0	0	0	0	0	0	0	0	0	0	0	0
K	A0A498LKP6	ES1 mitochondrial	canonical	LDVNSFDAVIFPGGHGIVKNLSTFSK	LDVNSFDAVIFPGGHGIVK[170]NLSTFSK	112	0	0	2	0	0	0	0	0	0	0	0	0	0	0	0	0	0	0	0
K	A0A498LKP6	ES1 mitochondrial	canonical	LDVNSFDAVIFPGGHGIVKNLSTFSK	LDVNSFDAVIFPGGHGIVK[170]N[115]LSTFSK	112	0	0	2	0	0	0	0	0	0	0	0	0	0	0	0	0	0	0	0
K	A0A498LKP6	ES1 mitochondrial	canonical	LDVNSFDAVIFPGGHGIVKNLSTFSK	LDVNSFDAVIFPGGHGIVK[170]N[115]LSTFSK[142]	112	0	0	1	0	0	0	0	0	0	0	0	0	0	0	0	0	0	0	0
K	A0A498LKP6	ES1 mitochondrial	canonical	WGRWPNTNMVQAVKSMGAR	WGRWPNTNMVQAVK[170]SMGAR	188	0	0	1	0	0	0	0	0	0	0	0	0	0	0	0	0	0	0	0
K	A0A498LKT6	Ependymin-like protein	canonical	VFEKFSYDAYGQNIR	VFEK[170]FSYDAYGQNIR	49	0	0	0	0	0	0	0	0	1	0	0	0	0	0	0	1	0	0	0
K	A0A498LL74	Annexin	canonical	CIKNTPAYFAER	n[43]C[143]IK[170]N[115]TPAYFAER	371, 373	0	0	0	0	0	0	0	0	0	0	0	0	0	0	0	0	0	0	2
K	A0A498LL74	Annexin	canonical	QDAQKLYAAGANK	QDAQK[170]LYAAGANK	338	0	0	0	0	0	0	0	0	0	0	0	0	0	0	0	0	0	0	1
K	A0A498LLC0	Adenosylhomocysteinase	subsumed	HFENMKDDAIVCNIGHFDCEIDMK	n[15]HFEN[115]MK[170]DDAIVC[160]NIGHFDC[160]EIDMK	566	0	0	0	0	0	0	0	0	0	0	0	0	0	0	0	2	0	0	0
K	A0A498LLC0	Adenosylhomocysteinase	subsumed	KAIDIAENEMPGLMK	KAIDIAENEMPGLM[147]K[170]	252	0	0	0	0	0	0	0	0	0	0	0	0	0	0	0	1	0	0	0
K	A0A498LLC0	Adenosylhomocysteinase	subsumed	KAIDIAENEMPGLMK	KAIDIAENEM[147]PGLMK[170]	252	0	0	0	0	0	0	0	0	0	0	0	0	0	0	0	1	0	0	0
K	A0A498LLC0	Adenosylhomocysteinase	subsumed	KGELKVTAINVNDSVTK	KGELK[170]VTAINVNDSVTK	409	0	0	0	0	0	0	0	0	0	0	0	0	0	0	0	3	0	0	0
K	A0A498LLC0	Adenosylhomocysteinase	subsumed	LLAGIKGISEETTTGVHNLYK	LLAGIK[170]GISEETTTGVHNLYK	386	0	0	4	0	0	0	0	0	1	0	0	0	0	0	0	4	0	0	1
K	A0A498LLC5	Gelsolin-like protein	indistinguishable representative	AAMKVAEQFIKDK	n[43]AAMK[170]VAEQFIKDK	432, 435	0	0	8	0	0	0	0	0	0	0	0	0	0	0	0	0	0	0	0
K	A0A498LLC5	Gelsolin-like protein	indistinguishable representative	ANIHMVEDGSEPEAVLAALGQKPSIPAGSPDDEKTDR	ANIHMVEDGSEPEAVLAALGQK[170]PSIPAGSPDDEKTDR	352	0	0	17	0	0	0	0	0	0	0	0	0	0	0	0	0	0	0	0
K	A0A498LLC5	Gelsolin-like protein	indistinguishable representative	ANIHMVEDGSEPEAVLAALGQKPSIPAGSPDDEKTDR	ANIHM[147]VEDGSEPEAVLAALGQK[170]PSIPAGSPDDEKTDR	352	0	0	16	0	0	0	0	0	0	0	0	0	0	0	0	0	0	0	0
K	A0A498LLC5	Gelsolin-like protein	indistinguishable representative	ANIHMVEDGSEPEAVLAALGQKPSIPAGSPDDEKTDR	n[15]ANIHMVEDGSEPEAVLAALGQK[170]PSIPAGSPDDEKTDR	352	0	0	5	0	0	0	0	0	0	1	0	0	0	0	0	2	0	0	0
K	A0A498LLC5	Gelsolin-like protein	indistinguishable representative	ANIHMVEDGSEPEAVLAALGQKPSIPAGSPDDEKTDR	n[43]ANIHM[147]VEDGSEPEAVLAALGQK[170]PSIPAGSPDDEKTDR	331, 352	0	0	8	0	0	0	0	0	0	0	0	0	0	0	0	0	0	0	0
K	A0A498LLC5	Gelsolin-like protein	indistinguishable representative	ANIHMVEDGSEPEAVLAALGQKPSIPAGSPDDEKTDRSNQNK	ANIHMVEDGSEPEAVLAALGQK[170]PSIPAGSPDDEKTDRSN[115]QNK	352	0	0	1	0	0	0	0	0	0	0	0	0	0	0	0	0	0	0	0
K	A0A498LLC5	Gelsolin-like protein	indistinguishable representative	AVEVEPTASKLNTNDAFVLK	AVEVEPTASK[170]LNTNDAFVLK	662	0	0	5	0	0	0	0	0	0	0	0	0	0	2	0	0	0	0	6
K	A0A498LLC5	Gelsolin-like protein	indistinguishable representative	AVEVEPTASKLNTNDAFVLK	AVEVEPTASK[170]LN[115]TNDAFVLK	662	0	0	3	0	0	0	0	0	0	0	0	0	0	0	0	0	0	0	0
K	A0A498LLC5	Gelsolin-like protein	indistinguishable representative	AVEVEPTASKLNTNDAFVLK	AVEVEPTASK[170]LN[115]TN[115]DAFVLK	662	0	0	1	0	0	0	0	0	0	0	0	0	0	0	0	0	0	0	0
K	A0A498LLC5	Gelsolin-like protein	indistinguishable representative	DKNYPKNTQIQVMPAGGETTLFK	DKNYPK[170]N[115]TQIQVMPAGGETTLFK	448	0	0	5	0	0	0	0	0	0	0	0	0	0	0	0	0	0	0	2
K	A0A498LLC5	Gelsolin-like protein	indistinguishable representative	EFQNAGKEPGLQIWR	EFQNAGK[170]EPGLQIWR	143	0	0	4	0	0	0	0	0	0	0	0	0	0	0	0	0	0	0	0
K	A0A498LLC5	Gelsolin-like protein	indistinguishable representative	GKPMIIHLGGTSR	GK[170]PM[147]IIHLGGTSR	617	0	0	1	0	0	0	0	0	0	0	0	0	0	0	0	0	0	0	0
K	A0A498LLC5	Gelsolin-like protein	indistinguishable representative	GTLYMVSDAAGSMKTSLVAQSSPFK	GTLYMVSDAAGSMK[170]TSLVAQSSPFK	386	0	0	1	0	0	0	0	0	0	0	0	0	0	0	0	0	0	0	0
K	A0A498LLC5	Gelsolin-like protein	indistinguishable representative	GTLYMVSDAAGSMKTSLVAQSSPFK	GTLYM[147]VSDAAGSM[147]K[170]TSLVAQSSPFK	386	0	0	1	0	0	0	0	0	0	0	0	0	0	0	0	0	0	0	0
K	A0A498LLC5	Gelsolin-like protein	indistinguishable representative	GTLYMVSDAAGSMKTSLVAQSSPFK	n[43]GTLYMVSDAAGSM[147]K[170]TSLVAQSSPFK	373, 386	0	0	2	0	0	0	0	0	0	0	0	0	0	0	0	0	0	0	0
K	A0A498LLC5	Gelsolin-like protein	indistinguishable representative	GTLYMVSDAAGSMKTSLVAQSSPFK	n[43]GTLYM[147]VSDAAGSMK[170]TSLVAQSSPFK	373, 386	0	0	2	0	0	0	0	0	0	0	0	0	0	0	0	0	0	0	0
K	A0A498LLC5	Gelsolin-like protein	indistinguishable representative	GTPIVTVKQGSEPPTFTGWFQAWDPK	GTPIVTVK[170]QGSEPPTFTGWFQAWDPK	819	0	0	1	0	0	0	0	0	0	0	0	0	0	0	0	0	0	0	0
K	A0A498LLC5	Gelsolin-like protein	indistinguishable representative	HVCSFLGGSATEISEGKEPAGFWSALGGK	HVC[160]SFLGGSATEISEGK[170]EPAGFWSALGGK	711	0	0	6	0	0	0	0	0	0	0	0	0	0	0	0	0	0	0	0
K	A0A498LLC5	Gelsolin-like protein	indistinguishable representative	HVCSFLGGSATEISEGKEPAGFWSALGGKK	HVC[160]SFLGGSATEISEGKEPAGFWSALGGK[170]K	723	0	0	3	0	0	0	0	0	0	0	0	0	0	0	0	0	0	0	0
K	A0A498LLC5	Gelsolin-like protein	indistinguishable representative	HVCSFLGGSATEISEGKEPAGFWSALGGKK	HVC[160]SFLGGSATEISEGKEPAGFW[202]SALGGK[170]K	723	0	0	4	0	0	0	0	0	0	0	0	0	0	0	0	0	0	0	0
K	A0A498LLC5	Gelsolin-like protein	indistinguishable representative	HVCSFLGGSATEISEGKEPAGFWSALGGKK	HVC[160]SFLGGSATEISEGK[170]EPAGFWSALGGKK	711	0	0	8	0	0	0	0	0	0	0	0	0	0	0	0	0	0	0	0
K	A0A498LLC5	Gelsolin-like protein	indistinguishable representative	HVCSFLGGSATEISEGKEPAGFWSALGGKK	HVC[160]SFLGGSATEISEGK[170]EPAGFW[202]SALGGKK	711	0	0	3	0	0	0	0	0	0	0	0	0	0	0	0	0	0	0	0
K	A0A498LLC5	Gelsolin-like protein	indistinguishable representative	IAKVSKVPFDASSLHSNK	IAKVSK[170]VPFDASSLHSNK	494	0	0	1	0	0	0	0	0	0	0	0	0	0	0	0	0	0	0	0
K	A0A498LLC5	Gelsolin-like protein	indistinguishable representative	IAKVSKVPFDASSLHSNK	IAK[170]VSKVPFDASSLHSNK	491	0	0	5	0	0	0	0	0	0	0	0	0	0	0	0	0	0	0	0
K	A0A498LLC5	Gelsolin-like protein	indistinguishable representative	IAKVSKVPFDASSLHSNK	n[15]IAK[170]VSKVPFDASSLHSNK	491	0	0	1	0	0	0	0	0	0	0	0	0	0	0	0	0	0	0	0
K	A0A498LLC5	Gelsolin-like protein	indistinguishable representative	IAKVSKVPFDASSLHSNK	n[43]IAK[170]VSKVPFDASSLHSNK	489, 491	0	0	4	0	0	0	0	0	0	0	0	0	0	0	0	0	0	0	0
K	A0A498LLC5	Gelsolin-like protein	indistinguishable representative	IFLWKGPSANTEER	IFLWK[170]GPSANTEER	421	0	0	6	0	0	0	0	0	0	0	0	0	0	0	0	0	0	0	2
K	A0A498LLC5	Gelsolin-like protein	indistinguishable representative	IFLWKGPSANTEER	IFLWK[170]GPSAN[115]TEER	421	0	0	1	0	0	0	0	0	0	0	0	0	0	0	0	0	0	0	0
K	A0A498LLC5	Gelsolin-like protein	indistinguishable representative	IFLWKGPSANTEER	n[43]IFLWK[170]GPSANTEER	417, 421	0	0	2	0	0	0	0	0	0	0	0	0	0	0	0	0	0	0	0
K	A0A498LLC5	Gelsolin-like protein	indistinguishable representative	IFLWKGPSANTEERK	n[43]IFLWK[170]GPSANTEERK	417, 421	0	0	4	0	0	0	0	0	0	0	0	0	0	0	0	0	0	0	0
K	A0A498LLC5	Gelsolin-like protein	indistinguishable representative	NGAGEIAKKYVDSDPSGR	N[115]GAGEIAK[170]K[170]YVDSDPSGR	800, 801	0	0	2	0	0	0	0	0	0	0	0	0	0	0	0	0	0	0	0
K	A0A498LLC5	Gelsolin-like protein	indistinguishable representative	NTQIQVMPAGGETTLFKQFFSDWK	NTQIQVMPAGGETTLFK[170]QFFSDWK	465	0	0	1	0	0	0	0	0	0	0	0	0	0	0	0	0	0	0	0
K	A0A498LLC5	Gelsolin-like protein	indistinguishable representative	NYPKNTQIQVMPAGGETTLFK	NYPK[170]N[115]TQIQVMPAGGETTLFK	448	0	0	1	0	0	0	0	0	0	0	0	0	0	0	0	0	0	0	0
K	A0A498LLC5	Gelsolin-like protein	indistinguishable representative	QFFSDWKDKDQTTGPGQAYAIGR	QFFSDWKDK[170]DQTTGPGQAYAIGR	474	0	0	2	0	0	0	0	0	0	0	0	0	0	0	0	0	0	0	1
K	A0A498LLC5	Gelsolin-like protein	indistinguishable representative	QFFSDWKDKDQTTGPGQAYAIGR	QFFSDWK[142]DK[170]DQTTGPGQAYAIGR	474	0	0	3	0	0	0	0	0	0	0	0	0	0	0	0	0	0	0	0
K	A0A498LLC5	Gelsolin-like protein	indistinguishable representative	QFFSDWKDKDQTTGPGQAYAIGR	QFFSDWK[142]DK[170]DQ[111]TTGPGQAYAIGR	474	0	0	1	0	0	0	0	0	0	0	0	0	0	0	0	0	0	0	0
K	A0A498LLC5	Gelsolin-like protein	indistinguishable representative	QFFSDWKDKDQTTGPGQAYAIGR	QFFSDWK[170]DKDQTTGPGQAYAIGR	472	0	0	25	0	0	0	0	0	0	0	0	0	0	2	0	0	0	0	2
K	A0A498LLC5	Gelsolin-like protein	indistinguishable representative	QFFSDWKDKDQTTGPGQAYAIGR	QFFSDWK[170]DK[170]DQTTGPGQAYAIGR	472, 474	0	0	2	0	0	0	0	0	0	0	0	0	0	0	0	0	0	0	0
K	A0A498LLC5	Gelsolin-like protein	indistinguishable representative	QFFSDWKDKDQTTGPGQAYAIGR	QFFSDW[202]K[170]DKDQTTGPGQAYAIGR	472	0	0	6	0	0	0	0	0	0	0	0	0	0	0	0	0	0	0	0
K	A0A498LLC5	Gelsolin-like protein	indistinguishable representative	QFFSDWKDKDQTTGPGQAYAIGR	QFFSDW[202]K[170]DKDQ[111]TTGPGQAYAIGR	472	0	0	3	0	0	0	0	0	0	0	0	0	0	0	0	0	0	0	0
K	A0A498LLC5	Gelsolin-like protein	indistinguishable representative	QFFSDWKDKDQTTGPGQAYAIGR	QFFSDW[202]K[170]DK[170]DQTTGPGQAYAIGR	472, 474	0	0	4	0	0	0	0	0	0	0	0	0	0	0	0	0	0	0	0
K	A0A498LLC5	Gelsolin-like protein	indistinguishable representative	QFFSDWKDKDQTTGPGQAYAIGR	Q[111]FFSDWKDK[170]DQTTGPGQAYAIGR	474	0	0	1	0	0	0	0	0	0	0	0	0	0	0	0	0	0	0	0
K	A0A498LLC5	Gelsolin-like protein	indistinguishable representative	QFFSDWKDKDQTTGPGQAYAIGR	Q[111]FFSDWK[142]DK[170]DQTTGPGQAYAIGR	474	0	0	6	0	0	0	0	0	0	0	0	0	0	0	0	0	0	0	0
K	A0A498LLC5	Gelsolin-like protein	indistinguishable representative	QFFSDWKDKDQTTGPGQAYAIGR	Q[111]FFSDWK[170]DKDQTTGPGQAYAIGR	472	0	0	3	0	0	0	0	0	0	0	0	0	0	0	0	0	0	0	0
K	A0A498LLC5	Gelsolin-like protein	indistinguishable representative	QFFSDWKDKDQTTGPGQAYAIGR	Q[111]FFSDW[202]K[142]DK[170]DQTTGPGQAYAIGR	474	0	0	1	0	0	0	0	0	0	0	0	0	0	0	0	0	0	0	0
K	A0A498LLC5	Gelsolin-like protein	indistinguishable representative	QFFSDWKDKDQTTGPGQAYAIGR	Q[111]FFSDW[202]K[170]DKDQTTGPGQAYAIGR	472	0	0	3	0	0	0	0	0	0	0	0	0	0	0	0	0	0	0	0
K	A0A498LLC5	Gelsolin-like protein	indistinguishable representative	QFFSDWKDKDQTTGPGQAYAIGR	n[15]QFFSDWK[170]DKDQTTGPGQAYAIGR	472	0	0	1	0	0	0	0	0	0	0	0	0	0	0	0	0	0	0	0
K	A0A498LLC5	Gelsolin-like protein	indistinguishable representative	QFFSDWKDKDQTTGPGQAYAIGR	n[15]QFFSDW[202]K[142]DK[170]DQTTGPGQAYAIGR	474	0	0	1	0	0	0	0	0	0	0	0	0	0	0	0	0	0	0	0
K	A0A498LLC5	Gelsolin-like protein	indistinguishable representative	QFFSDWKDKDQTTGPGQAYAIGR	n[43]QFFSDWKDK[170]DQTTGPGQAYAIGR	466, 474	0	0	2	0	0	0	0	0	0	0	0	0	0	0	0	0	0	0	0
K	A0A498LLC5	Gelsolin-like protein	indistinguishable representative	QFFSDWKDKDQTTGPGQAYAIGR	n[43]QFFSDWK[170]DKDQTTGPGQAYAIGR	466, 472	0	0	2	0	0	0	0	0	0	0	0	0	0	0	0	0	0	0	0
K	A0A498LLC5	Gelsolin-like protein	indistinguishable representative	QFFSDWKDKDQTTGPGQAYAIGR	n[43]QFFSDW[202]KDK[170]DQTTGPGQAYAIGR	466, 474	0	0	4	0	0	0	0	0	0	0	0	0	0	0	0	0	0	0	0
K	A0A498LLC5	Gelsolin-like protein	indistinguishable representative	QFFSDWKDKDQTTGPGQAYAIGR	n[43]QFFSDW[202]K[170]DKDQTTGPGQAYAIGR	466, 472	0	0	2	0	0	0	0	0	0	0	0	0	0	0	0	0	0	0	0
K	A0A498LLC5	Gelsolin-like protein	indistinguishable representative	QGGVASGFQHVVTNDMNVKR	QGGVASGFQHVVTNDMNVK[170]R	262	0	0	1	0	0	0	0	0	0	0	0	0	0	0	0	0	0	0	0
K	A0A498LLC5	Gelsolin-like protein	indistinguishable representative	QGGVASGFQHVVTNDMNVKR	QGGVASGFQHVVTNDMN[115]VK[170]R	262	0	0	3	0	0	0	0	0	0	0	0	0	0	0	0	0	0	0	0
K	A0A498LLC5	Gelsolin-like protein	indistinguishable representative	QGGVASGFQHVVTNDMNVKR	QGGVASGFQHVVTNDMN[115]VK[170]R[170]	262	0	0	1	0	0	0	0	0	0	0	0	0	0	0	0	0	0	0	0
K	A0A498LLC5	Gelsolin-like protein	indistinguishable representative	QGGVASGFQHVVTNDMNVKR	QGGVASGFQHVVTNDM[147]NVK[170]R	262	0	0	1	0	0	0	0	0	0	0	0	0	0	0	0	0	0	0	0
K	A0A498LLC5	Gelsolin-like protein	indistinguishable representative	QGGVASGFQHVVTNDMNVKR	QGGVASGFQHVVTNDM[147]N[115]VK[170]R	262	0	0	2	0	0	0	0	0	0	0	0	0	0	0	0	0	0	0	0
K	A0A498LLC5	Gelsolin-like protein	indistinguishable representative	QGGVASGFQHVVTNDMNVKR	QGGVASGFQHVVTN[115]DMN[115]VK[170]R	262	0	0	4	0	0	0	0	0	0	0	0	0	0	0	0	0	0	0	0
K	A0A498LLC5	Gelsolin-like protein	indistinguishable representative	QGGVASGFQHVVTNDMNVKR	QGGVASGFQHVVTN[115]DM[147]NVK[170]R	262	0	0	1	0	0	0	0	0	0	0	0	0	0	0	0	0	0	0	0
K	A0A498LLC5	Gelsolin-like protein	indistinguishable representative	QGGVASGFQHVVTNDMNVKR	QGGVASGFQHVVTN[115]DM[147]NVK[170]R[170]	262	0	0	1	0	0	0	0	0	0	0	0	0	0	0	0	0	0	0	0
K	A0A498LLC5	Gelsolin-like protein	indistinguishable representative	QGGVASGFQHVVTNDMNVKR	Q[111]GGVASGFQHVVTNDMN[115]VK[170]R	262	0	0	2	0	0	0	0	0	0	0	0	0	0	0	0	0	0	0	0
K	A0A498LLC5	Gelsolin-like protein	indistinguishable representative	QGGVASGFQHVVTNDMNVKR	Q[111]GGVASGFQHVVTNDMN[115]VK[170]R[170]	262	0	0	2	0	0	0	0	0	0	0	0	0	0	0	0	0	0	0	0
K	A0A498LLC5	Gelsolin-like protein	indistinguishable representative	QGGVASGFQHVVTNDMNVKR	Q[111]GGVASGFQHVVTN[115]DMNVK[170]R[170]	262	0	0	1	0	0	0	0	0	0	0	0	0	0	0	0	0	0	0	0
K	A0A498LLC5	Gelsolin-like protein	indistinguishable representative	QGSEPPTFTGWFQAWDPKMWDTDPLQR	QGSEPPTFTGWFQAWDPK[170]MWDTDPLQR	837	0	0	1	0	0	0	0	0	0	0	0	0	0	0	0	0	0	0	0
K	A0A498LLC5	Gelsolin-like protein	indistinguishable representative	RGTPIVTVKQGSEPPTFTGWFQAWDPK	RGTPIVTVK[170]QGSEPPTFTGWFQAWDPK	819	0	0	1	0	0	0	0	0	0	0	0	0	0	0	0	0	0	0	0
K	A0A498LLC5	Gelsolin-like protein	indistinguishable representative	SNQNKGTLYMVSDAAGSMK	SNQNK[170]GTLYMVSDAAGSMK	372	0	0	5	0	0	0	0	0	0	0	0	0	0	0	0	0	0	0	0
K	A0A498LLC5	Gelsolin-like protein	indistinguishable representative	SNQNKGTLYMVSDAAGSMK	SNQNK[170]GTLYMVSDAAGSM[147]K	372	0	0	2	0	0	0	0	0	0	0	0	0	0	0	0	0	0	0	0
K	A0A498LLC5	Gelsolin-like protein	indistinguishable representative	SNQNKGTLYMVSDAAGSMK	SNQNK[170]GTLYM[147]VSDAAGSM[147]K	372	0	0	1	0	0	0	0	0	0	0	0	0	0	0	0	0	0	0	0
K	A0A498LLC5	Gelsolin-like protein	indistinguishable representative	SNQNKGTLYMVSDAAGSMK	SNQN[115]K[170]GTLYMVSDAAGSMK	372	0	0	3	0	0	0	0	0	0	0	0	0	0	0	0	0	0	0	1
K	A0A498LLC5	Gelsolin-like protein	indistinguishable representative	SNQNKGTLYMVSDAAGSMK	SNQN[115]K[170]GTLYMVSDAAGSM[147]K	372	0	0	3	0	0	0	0	0	0	0	0	0	0	0	0	0	0	0	0
K	A0A498LLC5	Gelsolin-like protein	indistinguishable representative	SNQNKGTLYMVSDAAGSMK	SNQN[115]K[170]GTLYM[147]VSDAAGSMK	372	0	0	1	0	0	0	0	0	0	0	0	0	0	0	0	0	0	0	0
K	A0A498LLC5	Gelsolin-like protein	indistinguishable representative	SNQNKGTLYMVSDAAGSMK	SNQN[115]K[170]GTLYM[147]VSDAAGSM[147]K	372	0	0	2	0	0	0	0	0	0	0	0	0	0	0	0	0	0	0	0
K	A0A498LLC5	Gelsolin-like protein	indistinguishable representative	SNQNKGTLYMVSDAAGSMK	SN[115]QNKGTLYMVSDAAGSM[147]K[170]	386	0	0	2	0	0	0	0	0	0	0	0	0	0	0	0	0	0	0	0
K	A0A498LLC5	Gelsolin-like protein	indistinguishable representative	SNQNKGTLYMVSDAAGSMKTSLVAQSSPFK	n[43]SN[115]QNK[170]GTLYMVSDAAGSMKTSLVAQSSPFK	368, 372	0	0	2	0	0	0	0	0	0	0	0	0	0	0	0	0	0	0	0
K	A0A498LLC5	Gelsolin-like protein	indistinguishable representative	SPGGLFVWKGVGASDEEMAAAK	SPGGLFVWK[170]GVGASDEEMAAAK	681	0	0	8	0	0	0	0	0	0	0	0	0	0	0	0	0	0	0	1
K	A0A498LLC5	Gelsolin-like protein	indistinguishable representative	SPGGLFVWKGVGASDEEMAAAK	SPGGLFVWK[170]GVGASDEEM[147]AAAK	681	0	0	1	0	0	0	0	0	0	0	0	0	0	0	0	0	0	0	0
K	A0A498LLC5	Gelsolin-like protein	indistinguishable representative	TMAAQHGMVDDGSGKVQIWR	TMAAQHGMVDDGSGK[170]VQIWR	521	0	0	8	0	0	0	0	0	0	0	0	0	0	0	0	0	0	0	0
K	A0A498LLC5	Gelsolin-like protein	indistinguishable representative	TMAAQHGMVDDGSGKVQIWR	TMAAQHGM[147]VDDGSGK[170]VQIWR	521	0	0	2	0	0	0	0	0	0	0	0	0	0	0	0	0	0	0	0
K	A0A498LLC5	Gelsolin-like protein	indistinguishable representative	TMAAQHGMVDDGSGKVQIWR	TM[147]AAQHGMVDDGSGK[170]VQIWR	521	0	0	1	0	0	0	0	0	0	0	0	0	0	0	0	0	0	0	0
K	A0A498LLC5	Gelsolin-like protein	indistinguishable representative	TMAAQHGMVDDGSGKVQIWR	TM[147]AAQHGM[147]VDDGSGK[170]VQIWR	521	0	0	1	0	0	0	0	0	0	0	0	0	0	0	0	0	0	0	0
K	A0A498LLC5	Gelsolin-like protein	indistinguishable representative	TSLVAQSSPFKQQMLSPNECYILDNGVDSK	TSLVAQSSPFK[170]QQMLSPN[115]EC[160]YILDNGVDSK	397	0	0	2	0	0	0	0	0	0	0	0	0	0	0	0	0	0	0	0
K	A0A498LLC5	Gelsolin-like protein	indistinguishable representative	TSLVAQSSPFKQQMLSPNECYILDNGVDSK	TSLVAQSSPFK[170]QQM[147]LSPNEC[160]YILDN[115]GVDSK	397	0	0	3	0	0	0	0	0	0	0	0	0	0	0	0	0	0	0	0
K	A0A498LLC5	Gelsolin-like protein	indistinguishable representative	TSLVAQSSPFKQQMLSPNECYILDNGVDSK	TSLVAQSSPFK[170]QQM[147]LSPN[115]EC[160]YILDNGVDSK	397	0	0	3	0	0	0	0	0	0	0	0	0	0	0	0	0	0	0	0
K	A0A498LLC5	Gelsolin-like protein	indistinguishable representative	TSLVAQSSPFKQQMLSPNECYILDNGVDSK	TSLVAQSSPFK[170]QQM[147]LSPN[115]EC[160]YILDN[115]GVDSK	397	0	0	1	0	0	0	0	0	0	0	0	0	0	0	0	0	0	0	0
K	A0A498LLC5	Gelsolin-like protein	indistinguishable representative	TSLVAQSSPFKQQMLSPNECYILDNGVDSK	n[15]TSLVAQSSPFK[170]QQMLSPN[115]EC[160]YILDNGVDSK	397	0	0	1	0	0	0	0	0	0	0	0	0	0	0	0	0	0	0	0
K	A0A498LLC5	Gelsolin-like protein	indistinguishable representative	TSLVAQSSPFKQQMLSPNECYILDNGVDSK	n[43]TSLVAQSSPFK[170]QQM[147]LSPNEC[160]YILDN[115]GVDSK	387, 397	0	0	2	0	0	0	0	0	0	0	0	0	0	0	0	0	0	0	0
K	A0A498LLC5	Gelsolin-like protein	indistinguishable representative	VAEQFIKDKNYPK	VAEQFIKDK[170]N[115]YPK	444	0	0	1	0	0	0	0	0	0	0	0	0	0	0	0	0	0	0	0
K	A0A498LLC5	Gelsolin-like protein	indistinguishable representative	VAEQFIKDKNYPK	VAEQFIK[170]DKN[115]YPK	442	0	0	1	0	0	0	0	0	0	0	0	0	0	0	0	0	0	0	0
K	A0A498LLC5	Gelsolin-like protein	indistinguishable representative	VPFDASSLHSNKTMAAQHGMVDDGSGK	VPFDASSLHSNK[170]TMAAQHGMVDDGSGK	506	0	0	1	0	0	0	0	0	0	0	0	0	0	0	0	0	0	0	0
K	A0A498LLC5	Gelsolin-like protein	indistinguishable representative	VPFDASSLHSNKTMAAQHGMVDDGSGK	VPFDASSLHSN[115]K[170]TMAAQHGMVDDGSGK	506	0	0	1	0	0	0	0	0	0	0	0	0	0	0	0	0	0	0	0
K	A0A498LLC5	Gelsolin-like protein	indistinguishable representative	VPFDASSLHSNKTMAAQHGMVDDGSGK	VPFDASSLHSN[115]K[170]TMAAQHGM[147]VDDGSGK	506	0	0	1	0	0	0	0	0	0	0	0	0	0	0	0	0	0	0	0
K	A0A498LLC5	Gelsolin-like protein	indistinguishable representative	VSKVPFDASSLHSNK	VSK[170]VPFDASSLHSNK	494	0	0	11	0	0	0	0	0	0	0	0	0	0	0	0	0	0	0	2
K	A0A498LLC5	Gelsolin-like protein	indistinguishable representative	VSKVPFDASSLHSNK	n[15]VSK[170]VPFDASSLHSNK	494	0	0	8	0	0	0	0	0	0	0	0	0	0	0	0	0	0	0	0
K	A0A498LLC5	Gelsolin-like protein	indistinguishable representative	VSKVPFDASSLHSNKTMAAQHGMVDDGSGK	VSKVPFDASSLHSN[115]K[170]TMAAQHGMVDDGSGK	506	0	0	1	0	0	0	0	0	0	0	0	0	0	0	0	0	0	0	0
K	A0A498LLC5	Gelsolin-like protein	indistinguishable representative	VSKVPFDASSLHSNKTMAAQHGMVDDGSGK	VSKVPFDASSLHSN[115]K[170]TM[147]AAQHGMVDDGSGK	506	0	0	1	0	0	0	0	0	0	0	0	0	0	0	0	0	0	0	0
K	A0A498LLC5	Gelsolin-like protein	indistinguishable representative	VTQGQEPAHLMSLFKGKPMIIHLGGTSR	n[43]VTQGQEPAHLMSLFK[170]GKPMIIHLGGTSR	601, 615	0	0	2	0	0	0	0	0	0	0	0	0	0	0	0	0	0	0	0
K	A0A498LLC5	Gelsolin-like protein	indistinguishable representative	YKQGGVASGFQHVVTNDMNVKR	YKQGGVASGFQHVVTNDM[147]N[115]VK[170]R	262	0	0	1	0	0	0	0	0	0	0	0	0	0	0	0	0	0	0	0
K	A0A498LLF6	Moesin-like isoform X1	canonical	KGSELWLGVDALGLNIYERSDK	KGSELWLGVDALGLNIYERSDK[170]	249	0	0	0	0	0	0	0	0	0	0	0	0	0	0	0	2	0	0	0
K	A0A498LLF7	Kinesin KIF25	marginally distinguished	ANLKPEDISEVIMGHVLTAGHGQNPAR	ANLK[170]PEDISEVIMGHVLTAGHGQNPAR	46	0	0	0	0	0	0	0	0	0	0	0	0	0	0	0	1	0	0	0
K	A0A498LLG8	Adhesion G-coupled receptor L4-like protein	canonical	IQEYVPGISYIMGFYQKYEKNPER	IQEYVPGISYIMGFYQK[170]YEKN[115]PER	1414	0	0	0	0	0	0	0	0	0	0	0	0	0	0	0	0	0	2	0
K	A0A498LLG8	Adhesion G-coupled receptor L4-like protein	canonical	ITPMMPEKEDSQQGLPLAR	ITPMMPEK[170]EDSQQGLPLAR	1147	0	0	0	0	0	0	0	0	0	0	0	0	0	0	0	0	0	1	0
K	A0A498LLG8	Adhesion G-coupled receptor L4-like protein	canonical	MCANANVDKSHSSAK	MC[160]ANANVDK[170]SHSSAK	1342	0	0	0	0	0	0	0	0	0	0	0	0	0	0	0	0	0	1	0
K	A0A498LLG8	Adhesion G-coupled receptor L4-like protein	canonical	MCANANVDKSHSSAK	M[147]C[160]ANANVDK[170]SHSSAK	1342	0	0	0	0	0	0	0	0	0	0	0	0	0	0	0	0	0	1	0
K	A0A498LLG8	Adhesion G-coupled receptor L4-like protein	canonical	QYFSPFNVKGGNSR	QYFSPFNVK[170]GGN[115]SR[170]	747	0	0	0	0	0	0	0	0	0	0	0	0	0	0	0	0	0	1	0
K	A0A498LLG8	Adhesion G-coupled receptor L4-like protein	canonical	VSAACQPESKPSIYSK	VSAAC[160]QPESK[170]PSIYSK	1375	0	0	0	0	0	0	0	0	0	0	0	0	0	0	0	0	0	5	0
K	A0A498LLJ4	Fructose-bisphosphate aldolase (EC 4.1.2.13)	canonical	ALQASALAAWKGQAANK	ALQASALAAWK[142]GQAAN[115]K[170]	321	0	0	0	0	0	0	0	0	0	0	0	0	0	0	0	3	0	0	0
K	A0A498LLJ4	Fructose-bisphosphate aldolase (EC 4.1.2.13)	canonical	ALQASALAAWKGQAANK	ALQASALAAWK[170]GQAAN[115]K	315	0	0	0	0	0	0	0	0	1	0	0	0	0	0	0	3	0	0	1
K	A0A498LLJ4	Fructose-bisphosphate aldolase (EC 4.1.2.13)	canonical	ALQASALAAWKGQAANKK	ALQASALAAWKGQAAN[115]KK[170]	322	0	0	0	0	0	0	0	0	1	0	0	0	0	0	0	0	0	0	0
K	A0A498LLJ4	Fructose-bisphosphate aldolase (EC 4.1.2.13)	canonical	ALQASALAAWKGQAANKK	ALQASALAAWKGQAAN[115]K[142]K[170]	322	0	0	0	0	0	0	0	0	0	0	0	0	0	0	0	4	0	0	0
K	A0A498LLJ4	Fructose-bisphosphate aldolase (EC 4.1.2.13)	canonical	ALQASALAAWKGQAANKK	ALQASALAAWKGQAAN[115]K[170]K	321	0	0	0	0	0	0	0	0	0	0	0	0	0	0	0	5	0	0	0
K	A0A498LLJ4	Fructose-bisphosphate aldolase (EC 4.1.2.13)	canonical	ALQASALAAWKGQAANKK	ALQASALAAWK[170]GQAAN[115]KK	315	0	0	0	0	0	0	0	0	0	0	0	0	0	0	0	6	0	0	0
K	A0A498LLJ4	Fructose-bisphosphate aldolase (EC 4.1.2.13)	canonical	ALSDHHVYLEGTLLKPNMVTAGHSCTK	ALSDHHVYLEGTLLKPNMVTAGHS[167]C[160]TK[170]	242	1	0	0	0	0	0	0	0	0	0	0	0	0	0	0	0	0	0	0
K	A0A498LLJ4	Fructose-bisphosphate aldolase (EC 4.1.2.13)	canonical	ALSDHHVYLEGTLLKPNMVTAGHSCTK	ALSDHHVYLEGTLLKPNM[147]VTAGHSC[160]TK[170]	242	0	0	0	0	0	0	0	0	0	0	0	0	0	0	0	1	0	0	0
K	A0A498LLJ4	Fructose-bisphosphate aldolase (EC 4.1.2.13)	canonical	ALSDHHVYLEGTLLKPNMVTAGHSCTK	ALSDHHVYLEGTLLK[142]PN[115]MVTAGHSC[160]TK[170]	242	0	0	0	0	0	0	0	0	0	0	0	0	0	0	0	3	0	0	1
K	A0A498LLJ4	Fructose-bisphosphate aldolase (EC 4.1.2.13)	canonical	ALSDHHVYLEGTLLKPNMVTAGHSCTK	ALSDHHVYLEGTLLK[170]PNMVTAGHSC[160]TK	230	0	0	0	0	0	0	0	0	3	0	0	0	0	0	0	9	0	0	0
K	A0A498LLJ4	Fructose-bisphosphate aldolase (EC 4.1.2.13)	canonical	ALSDHHVYLEGTLLKPNMVTAGHSCTK	ALSDHHVYLEGTLLK[170]PNM[147]VTAGHSC[160]TK	230	0	0	0	1	0	0	0	0	0	0	0	0	0	0	0	15	0	0	0
K	A0A498LLJ4	Fructose-bisphosphate aldolase (EC 4.1.2.13)	canonical	ALSDHHVYLEGTLLKPNMVTAGHSCTK	ALSDHHVYLEGTLLK[170]PN[115]MVTAGHSC[160]TK[142]	230	0	0	0	0	0	0	0	0	0	0	0	0	0	0	0	2	0	0	0
K	A0A498LLJ4	Fructose-bisphosphate aldolase (EC 4.1.2.13)	canonical	ALSDHHVYLEGTLLKPNMVTAGHSCTK	ALSDHHVYLEGTLLK[170]PN[115]M[147]VTAGHSC[160]TK	230	0	0	0	0	0	0	0	0	0	0	0	0	0	0	0	1	0	0	0
K	A0A498LLJ4	Fructose-bisphosphate aldolase (EC 4.1.2.13)	canonical	ALSDHHVYLEGTLLKPNMVTAGHSCTK	n[15]ALSDHHVYLEGTLLK[170]PN[115]MVTAGHSC[160]TK	230	0	0	0	0	0	0	0	0	0	0	0	0	0	0	0	1	0	0	0
K	A0A498LLJ4	Fructose-bisphosphate aldolase (EC 4.1.2.13)	canonical	ALSDHHVYLEGTLLKPNMVTAGHSCTKK	ALSDHHVYLEGTLLKPN[115]MVTAGHSC[160]TK[170]K	242	3	0	0	0	0	0	0	0	0	0	0	0	0	0	0	0	0	0	0
K	A0A498LLJ4	Fructose-bisphosphate aldolase (EC 4.1.2.13)	canonical	ALSDHHVYLEGTLLKPNMVTAGHSCTKK	ALSDHHVYLEGTLLK[170]PNMVTAGHSC[160]TKK	230	0	0	0	0	0	0	0	0	0	0	0	0	0	0	0	1	0	0	1
K	A0A498LLJ4	Fructose-bisphosphate aldolase (EC 4.1.2.13)	canonical	ALSDHHVYLEGTLLKPNMVTAGHSCTKK	ALSDHHVYLEGTLLK[170]PNM[147]VTAGHSC[160]TKK	230	1	0	0	0	0	0	0	0	0	0	0	0	0	0	0	2	0	0	0
K	A0A498LLJ4	Fructose-bisphosphate aldolase (EC 4.1.2.13)	canonical	ALSDHHVYLEGTLLKPNMVTAGHSCTKK	ALSDHHVYLEGTLLK[170]PN[115]MVTAGHSC[160]TKK	230	3	0	0	0	0	0	0	0	0	0	0	0	0	0	0	0	0	0	0
K	A0A498LLJ4	Fructose-bisphosphate aldolase (EC 4.1.2.13)	canonical	ALSDHHVYLEGTLLKPNMVTAGHSCTKK	ALSDHHVYLEGTLLK[170]PN[115]MVTAGHSC[160]TK[142]K	230	2	0	0	0	0	0	0	0	0	0	0	0	0	0	0	0	0	0	0
K	A0A498LLJ4	Fructose-bisphosphate aldolase (EC 4.1.2.13)	canonical	CQYATEKVLAAVYK	C[143]QYATEK[170]VLAAVYK	208	0	0	0	0	0	0	0	0	0	0	0	0	0	0	0	7	0	0	1
K	A0A498LLJ4	Fructose-bisphosphate aldolase (EC 4.1.2.13)	canonical	CQYATEKVLAAVYK	C[160]QYATEK[170]VLAAVYK	208	0	0	0	0	0	0	0	0	0	0	0	0	0	0	0	10	0	0	0
K	A0A498LLJ4	Fructose-bisphosphate aldolase (EC 4.1.2.13)	canonical	CQYATEKVLAAVYK	n[43]C[160]QYATEK[170]VLAAVYK	202, 208	0	0	0	0	0	0	0	0	0	0	0	0	0	0	0	8	0	0	0
K	A0A498LLJ4	Fructose-bisphosphate aldolase (EC 4.1.2.13)	canonical	CVLKISDSCPSSLAIAENANVLAR	C[143]VLK[170]ISDSC[160]PSSLAIAENANVLAR	153	0	0	0	0	0	0	0	0	0	0	0	0	0	0	0	5	0	0	0
K	A0A498LLJ4	Fructose-bisphosphate aldolase (EC 4.1.2.13)	canonical	CVLKISDSCPSSLAIAENANVLAR	C[160]VLK[170]ISDSC[160]PSSLAIAENANVLAR	153	0	0	0	0	0	0	0	0	0	0	0	0	0	0	0	10	0	0	0
K	A0A498LLJ4	Fructose-bisphosphate aldolase (EC 4.1.2.13)	canonical	DGCDFAKWR	DGC[160]DFAK[170]WR	147	0	0	0	0	0	0	0	0	0	0	0	0	0	0	0	1	0	0	0
K	A0A498LLJ4	Fructose-bisphosphate aldolase (EC 4.1.2.13)	canonical	FQKINVENIEENRR	n[15]FQK[170]IN[115]VENIEENRR	46	0	0	0	0	0	0	0	0	0	0	0	0	0	0	0	1	0	0	0
K	A0A498LLJ4	Fructose-bisphosphate aldolase (EC 4.1.2.13)	canonical	GILAADESTGTMAK	GILAADESTGTMAK[170]	42	0	0	0	0	0	0	1	0	0	0	0	0	0	0	0	0	0	0	0
K	A0A498LLJ4	Fructose-bisphosphate aldolase (EC 4.1.2.13)	canonical	GILAADESTGTMAK	GILAADESTGTM[147]AK[170]	42	0	0	0	0	0	0	1	0	0	0	0	0	0	0	0	0	0	0	0
K	A0A498LLJ4	Fructose-bisphosphate aldolase (EC 4.1.2.13)	canonical	GILAADESTGTMAKR	GILAADESTGTMAK[170]R	42	0	0	0	0	0	0	0	0	0	0	0	0	0	0	0	2	0	0	0
K	A0A498LLJ4	Fructose-bisphosphate aldolase (EC 4.1.2.13)	canonical	GIVVGIKVDKGTAGLAGTDGETTTQGLDGLSER	GIVVGIK[142]VDK[170]GTAGLAGTDGETTTQGLDGLSER	111	0	0	0	0	0	0	0	0	0	0	0	0	0	0	0	7	0	0	0
K	A0A498LLJ4	Fructose-bisphosphate aldolase (EC 4.1.2.13)	canonical	GIVVGIKVDKGTAGLAGTDGETTTQGLDGLSER	GIVVGIK[170]VDKGTAGLAGTDGETTTQGLDGLSER	108	0	0	0	0	0	0	0	0	0	0	0	0	0	0	0	8	0	0	0
K	A0A498LLJ4	Fructose-bisphosphate aldolase (EC 4.1.2.13)	canonical	IVATGKGILAADESTGTMAK	IVATGK[170]GILAADESTGTMAK	28	0	0	0	0	0	0	0	0	3	0	0	0	0	0	0	11	0	0	1
K	A0A498LLJ4	Fructose-bisphosphate aldolase (EC 4.1.2.13)	canonical	IVATGKGILAADESTGTMAK	IVATGK[170]GILAADESTGTM[147]AK	28	0	0	0	0	0	0	0	0	1	0	0	0	0	0	0	8	0	0	1
K	A0A498LLJ4	Fructose-bisphosphate aldolase (EC 4.1.2.13)	canonical	IVATGKGILAADESTGTMAK	n[15]IVATGK[170]GILAADESTGTMAK	28	0	0	0	0	0	0	0	0	0	0	0	0	0	0	0	3	0	0	0
K	A0A498LLJ4	Fructose-bisphosphate aldolase (EC 4.1.2.13)	canonical	IVATGKGILAADESTGTMAKR	IVATGK[170]GILAADESTGTM[147]AKR	28	0	0	0	0	0	0	0	0	0	0	0	0	0	0	0	1	0	0	0
K	A0A498LLJ4	Fructose-bisphosphate aldolase (EC 4.1.2.13)	canonical	THQFPALSTEQKK	n[43]THQFPALSTEQK[170]K	2, 13	0	0	0	0	0	0	0	0	0	0	0	0	0	0	0	6	0	0	0
K	A0A498LLJ4	Fructose-bisphosphate aldolase (EC 4.1.2.13)	canonical	THQFPALSTEQKKELATIAQR	n[43]THQFPALSTEQKK[170]ELATIAQR	2, 14	0	0	0	0	0	0	0	0	0	0	0	0	0	0	0	2	0	0	0
K	A0A498LLJ4	Fructose-bisphosphate aldolase (EC 4.1.2.13)	canonical	THQFPALSTEQKKELATIAQR	n[43]THQFPALSTEQK[170]KELATIAQR	2, 13	0	0	0	0	0	0	0	0	0	0	0	0	0	0	0	48	0	0	0
K	A0A498LLJ4	Fructose-bisphosphate aldolase (EC 4.1.2.13)	canonical	THQFPALSTEQKKELATIAQR	n[43]THQFPALSTEQK[170]K[170]ELATIAQR	2, 13, 14	0	0	0	0	0	0	0	0	6	0	0	0	0	0	0	9	0	0	0
K	A0A498LLJ4	Fructose-bisphosphate aldolase (EC 4.1.2.13)	canonical	VDKGTAGLAGTDGETTTQGLDGLSER	VDK[170]GTAGLAGTDGETTTQGLDGLSER	111	0	0	0	0	0	0	0	0	1	0	0	0	0	0	0	1	0	0	0
K	A0A498LLJ4	Fructose-bisphosphate aldolase (EC 4.1.2.13)	canonical	VDKGTAGLAGTDGETTTQGLDGLSER	n[15]VDK[170]GTAGLAGTDGETTTQGLDGLSER	111	0	0	0	0	0	0	0	0	0	0	0	0	0	0	0	1	0	0	0
K	A0A498LLJ4	Fructose-bisphosphate aldolase (EC 4.1.2.13)	canonical	VDKGTAGLAGTDGETTTQGLDGLSER	n[43]VDK[170]GTAGLAGTDGETTTQGLDGLSER	109, 111	0	0	0	0	0	0	0	0	0	0	0	0	0	0	0	2	0	0	0
K	A0A498LLJ4	Fructose-bisphosphate aldolase (EC 4.1.2.13)	canonical	VIKDKGIVVGIK	VIKDK[170]GIVVGIK	101	0	0	0	0	0	0	0	0	0	0	0	0	0	0	0	2	0	0	0
K	A0A498LLJ4	Fructose-bisphosphate aldolase (EC 4.1.2.13)	canonical	VIKDKGIVVGIK	n[43]VIK[170]DKGIVVGIK	97, 99	0	0	0	0	0	0	0	0	0	0	0	0	0	0	0	14	0	0	0
K	A0A498LLJ4	Fructose-bisphosphate aldolase (EC 4.1.2.13)	canonical	VLAAVYKALSDHHVYLEGTLLKPNMVTAGHSCTK	VLAAVYK[170]ALSDHHVYLEGTLLKPN[115]M[147]VTAGHSC[160]TK	215	0	0	0	0	0	0	0	0	0	0	0	0	0	0	0	2	0	0	0
K	A0A498LLL2	Complement factor I	canonical	AEDNVKVTLMDSDAHK	AEDNVK[170]VTLMDSDAHK	271	0	0	0	0	0	0	0	0	0	0	0	0	0	0	0	0	0	0	1
K	A0A498LLL2	Complement factor I	canonical	LEELNLSDKCMQDNPAVR	LEELNLSDK[170]C[160]MQDNPAVR	589	0	0	0	0	0	0	0	0	0	0	0	0	0	0	0	0	0	0	3
K	A0A498LLM0	Aminoacyl tRNA synthase complex-interacting multifunctional 1	canonical	IISAEKHPDADALYVEQVDVGEAAPR	IISAEK[170]HPDADALYVEQVDVGEAAPR	157	0	0	0	0	0	0	0	0	0	0	0	0	0	2	0	0	0	0	0
K	A0A498LLR3	Influenza virus NS1A-binding-like protein	canonical	DRAEGLVLKVLSSFK	DRAEGLVLK[170]VLSSFK	44	0	0	0	0	0	0	0	0	0	0	0	0	0	0	0	0	0	0	2
K	A0A498LLU9	Amine sulfotransferase-like protein	marginally distinguished	LQDLVDKLQLKVK	LQDLVDKLQLK[170]VK	343	0	0	0	0	0	0	0	0	0	0	0	0	0	0	0	0	1	0	0
K	A0A498LLU9	Amine sulfotransferase-like protein	marginally distinguished	MQGSLEDQIVAANPLLEAYGNAKTVR	MQGSLEDQIVAANPLLEAYGNAK[170]TVR	220, 460	8	0	0	0	6	0	0	0	0	0	0	0	0	0	0	0	0	0	0
K	A0A498LLU9	Amine sulfotransferase-like protein	marginally distinguished	MQGSLEDQIVAANPLLEAYGNAKTVR	MQGSLEDQIVAANPLLEAYGN[115]AK[170]TVR	220, 460	4	0	2	0	2	0	0	0	0	0	0	0	0	0	0	0	0	0	0
K	A0A498LLU9	Amine sulfotransferase-like protein	marginally distinguished	MQGSLEDQIVAANPLLEAYGNAKTVR	MQGSLEDQIVAANPLLEAYGN[115]AK[170]TVR[170]	220, 460	16	0	0	0	4	0	0	0	0	0	0	0	0	0	0	0	0	0	0
K	A0A498LLU9	Amine sulfotransferase-like protein	marginally distinguished	MQGSLEDQIVAANPLLEAYGNAKTVR	MQGSLEDQIVAAN[115]PLLEAYGN[115]AK[170]TVR[170]	220, 460	8	0	0	0	2	0	0	0	0	0	0	0	0	0	0	0	0	0	0
K	A0A498LLU9	Amine sulfotransferase-like protein	marginally distinguished	MQGSLEDQIVAANPLLEAYGNAKTVR	M[147]QGSLEDQIVAANPLLEAYGNAK[170]TVR	220, 460	0	0	2	0	0	0	0	0	0	0	0	0	0	0	0	0	0	0	0
K	A0A498LLU9	Amine sulfotransferase-like protein	marginally distinguished	MQGSLEDQIVAANPLLEAYGNAKTVR	M[147]QGSLEDQIVAANPLLEAYGN[115]AK[170]TVR	220, 460	0	0	4	0	2	0	0	0	0	0	0	0	0	0	0	0	0	0	0
K	A0A498LLU9	Amine sulfotransferase-like protein	marginally distinguished	MQGSLEDQIVAANPLLEAYGNAKTVR	M[147]QGSLEDQIVAANPLLEAYGN[115]AK[170]TVR[170]	220, 460	4	0	0	0	2	0	0	0	0	0	0	0	0	0	0	0	0	0	0
K	A0A498LLU9	Amine sulfotransferase-like protein	marginally distinguished	MQGSLEDQIVAANPLLEAYGNAKTVR	M[147]QGSLEDQIVAAN[115]PLLEAYGN[115]AK[170]TVR[170]	220, 460	4	0	0	0	0	0	0	0	0	0	0	0	0	0	0	0	0	0	0
K	A0A498LLU9	Amine sulfotransferase-like protein	marginally distinguished	TLTVKEDDIHPMNPPKFDK	TLTVKEDDIHPMN[115]PPK[170]FDK	67	0	0	0	0	1	0	0	0	0	0	0	0	0	0	0	0	0	0	0
K	A0A498LLU9	Amine sulfotransferase-like protein	marginally distinguished	TVNTKRVIQYFATVGAMSGPK	n[43]TVN[115]TK[170]RVIQYFATVGAMSGPK	409, 413	2	0	2	0	0	0	0	0	0	0	0	0	0	0	0	0	0	0	0
K	A0A498LLW9	Tubulin beta chain	canonical	GLKMASTFIGNNTAIQEIFKR	n[43]GLK[170]MASTFIGNNTAIQEIFKR	348, 350	0	0	0	0	0	0	0	0	0	0	0	0	0	0	0	0	0	0	2
K	A0A498LLW9	Tubulin beta chain	canonical	TLKLTTPTYGDLNHLVSLTMSGVTTSLR	TLK[170]LTTPTYGDLN[115]HLVSLTMSGVTTSLR	204	0	0	0	0	0	0	0	0	0	0	0	0	0	0	0	0	0	0	2
K	A0A498LLY7	Semaphorin-3ab-like isoform X1	indistinguishable representative	HFCPNVPIILVGNKK	HFC[160]PNVPIILVGN[115]K[142]K[170]	121	0	0	0	0	0	0	0	1	0	0	0	0	0	0	0	0	0	0	0
K	A0A498LLY7	Semaphorin-3ab-like isoform X1	indistinguishable representative	HFCPNVPIILVGNKK	HFC[160]PNVPIILVGN[115]K[170]K	120	0	0	0	0	0	0	0	0	1	0	0	0	0	0	0	0	0	0	0
K	A0A498LM14	Myosin heavy fast skeletal muscle-like protein	subsumed	ADIAESQVNKLR	ADIAESQVN[115]K[170]LR	156	0	0	3	0	0	0	0	0	0	0	0	0	0	0	0	0	0	0	0
K	A0A498LM14	Myosin heavy fast skeletal muscle-like protein	subsumed	LQDLVDKLQLKVK	LQDLVDKLQLK[170]VK	111	0	0	0	0	0	0	0	0	0	0	0	0	0	0	0	0	1	0	0
K	A0A498LM50	Peroxiredoxin-1-like protein	canonical	ATAVVDGQFKDVQLSDYR	ATAVVDGQFK[170]DVQLSDYR	26	0	0	0	0	0	0	0	0	0	0	0	0	0	0	0	0	3	0	2
K	A0A498LM50	Peroxiredoxin-1-like protein	canonical	ATAVVDGQFKDVQLSDYR	n[43]ATAVVDGQFK[170]DVQLSDYR	17, 26	0	0	0	0	0	0	0	0	0	0	0	0	0	0	0	2	0	0	2
K	A0A498LM50	Peroxiredoxin-1-like protein	canonical	DYGVLKEDEGIAYR	DYGVLK[170]EDEGIAYR	119	0	0	0	0	0	0	0	0	0	0	1	0	0	0	0	1	7	0	4
K	A0A498LM50	Peroxiredoxin-1-like protein	canonical	KQGGLGSMNIPLVADLTQSISR	n[43]K[170]QGGLGSM[147]NIPLVADLTQSISR	92	0	0	0	0	0	0	0	0	0	0	0	0	0	0	0	0	8	0	2
K	A0A498LM50	Peroxiredoxin-1-like protein	canonical	LVQAFQHTDKYGEVCPAGWKPGSDTIVPDVQK	LVQAFQHTDKYGEVC[160]PAGWK[170]PGSDTIVPDVQK	177	0	0	0	0	0	0	0	0	0	0	0	0	0	0	0	2	2	0	2
K	A0A498LM50	Peroxiredoxin-1-like protein	canonical	LVQAFQHTDKYGEVCPAGWKPGSDTIVPDVQK	LVQAFQHTDKYGEVC[160]PAGW[202]K[170]PGSDTIVPDVQK	177	0	0	0	0	0	0	0	0	0	0	0	0	0	0	0	0	1	1	0
K	A0A498LM50	Peroxiredoxin-1-like protein	canonical	LVQAFQHTDKYGEVCPAGWKPGSDTIVPDVQK	LVQAFQHTDK[142]YGEVC[160]PAGWK[170]PGSDTIVPDVQK	177	0	0	0	0	0	0	0	0	0	0	0	0	0	0	0	0	1	0	0
K	A0A498LM50	Peroxiredoxin-1-like protein	canonical	LVQAFQHTDKYGEVCPAGWKPGSDTIVPDVQK	LVQAFQHTDK[170]YGEVC[160]PAGWKPGSDTIVPDVQK	167	0	0	1	0	0	0	0	0	0	0	2	0	0	3	0	2	6	0	2
K	A0A498LM50	Peroxiredoxin-1-like protein	canonical	LVQAFQHTDKYGEVCPAGWKPGSDTIVPDVQK	LVQAFQHTDK[170]YGEVC[160]PAGWK[142]PGSDTIVPDVQK	167	0	0	0	0	0	0	0	0	0	0	0	0	0	0	0	1	1	0	0
K	A0A498LM50	Peroxiredoxin-1-like protein	canonical	LVQAFQHTDKYGEVCPAGWKPGSDTIVPDVQK	LVQAFQHTDK[170]YGEVC[160]PAGW[202]KPGSDTIVPDVQK	167	0	0	0	0	0	0	0	0	0	0	0	0	0	0	0	1	2	0	0
K	A0A498LM50	Peroxiredoxin-1-like protein	canonical	LVQAFQHTDKYGEVCPAGWKPGSDTIVPDVQK	n[15]LVQAFQHTDK[170]YGEVC[160]PAGWKPGSDTIVPDVQK	167	0	0	0	0	0	0	0	0	0	0	0	0	0	0	0	0	2	0	0
K	A0A498LM50	Peroxiredoxin-1-like protein	canonical	LVQAFQHTDKYGEVCPAGWKPGSDTIVPDVQK	n[43]LVQAFQHTDK[170]YGEVC[160]PAGWKPGSDTIVPDVQK	158, 167	0	0	0	0	0	0	0	0	0	0	0	0	0	0	0	0	2	0	0
K	A0A498LM50	Peroxiredoxin-1-like protein	canonical	LVQAFQHTDKYGEVCPAGWKPGSDTIVPDVQKSK	LVQAFQHTDKYGEVC[160]PAGWK[170]PGSDTIVPDVQKSK	177	0	0	0	0	0	0	0	0	0	0	0	0	0	0	0	0	2	0	0
K	A0A498LM50	Peroxiredoxin-1-like protein	canonical	SSGNAKIGQPAPQFK	n[43]SSGNAK[170]IGQPAPQFK	2, 7	0	0	2	0	0	0	0	0	0	0	0	0	0	0	0	0	8	0	4
K	A0A498LM50	Peroxiredoxin-1-like protein	canonical	YGEVCPAGWKPGSDTIVPDVQK	YGEVC[160]PAGWK[170]PGSDTIVPDVQK	177	0	0	0	0	0	0	0	0	0	0	0	0	0	0	0	0	1	0	0
K	A0A498LM76	Vinculin	subsumed	AAAVGTANKSTVEGIQAAVK	AAAVGTANK[170]STVEGIQAAVK	655	0	0	0	0	0	0	0	0	0	0	0	0	0	0	0	0	0	0	7
K	A0A498LM76	Vinculin	subsumed	AAAVGTANKSTVEGIQAAVK	AAAVGTAN[115]K[170]STVEGIQAAVK	655	0	0	0	0	0	0	0	0	0	0	0	0	0	0	0	0	0	0	2
K	A0A498LM76	Vinculin	subsumed	ALAKQIATALQNLQSK	ALAK[170]QIATALQNLQSK	464	0	0	0	0	0	0	0	0	0	0	0	0	0	0	0	0	0	0	3
K	A0A498LM76	Vinculin	subsumed	AQQVSQGLDVLTGKVENAAR	AQQVSQGLDVLTGK[170]VENAAR	366	0	0	0	0	0	0	0	0	0	0	0	0	0	0	0	0	0	0	3
K	A0A498LM76	Vinculin	subsumed	AQQVSQGLDVLTGKVENAAR	AQQVSQGLDVLTGK[170]VEN[115]AAR	366	0	0	0	0	0	0	0	0	0	0	0	0	0	0	0	0	0	0	2
K	A0A498LM76	Vinculin	subsumed	DIVGTAKTLGQLTEQVSDLR	DIVGTAK[170]TLGQLTEQVSDLR	326	0	0	0	0	0	0	0	0	0	0	0	0	0	0	0	0	0	0	7
K	A0A498LM76	Vinculin	subsumed	DLDKCQVAMANHQPQMLVAGATSIAR	DLDK[170]C[160]QVAMAN[115]HQPQMLVAGATSIAR	736	0	0	0	0	0	0	0	0	0	0	0	0	0	0	0	0	0	0	2
K	A0A498LM76	Vinculin	subsumed	DLDKCQVAMANHQPQMLVAGATSIAR	n[43]DLDK[170]C[160]QVAMAN[115]HQPQMLVAGATSIAR	733, 736	0	0	0	0	0	0	0	0	0	0	0	0	0	0	0	0	0	0	2
K	A0A498LM76	Vinculin	subsumed	GSGTSPVAIQKAQQVSQGLDVLTGK	GSGTSPVAIQK[170]AQQVSQGLDVLTGK	352	0	0	0	0	0	0	0	0	0	0	0	0	0	0	0	0	0	0	4
K	A0A498LM76	Vinculin	subsumed	GSGTSPVAIQKAQQVSQGLDVLTGK	n[43]GSGTSPVAIQK[170]AQQVSQGLDVLTGK	342, 352	0	0	0	0	0	0	0	0	0	0	0	0	0	0	0	0	0	0	2
K	A0A498LM76	Vinculin	subsumed	ILLKNPGNQAAYEHFETMK	ILLK[170]NPGNQAAYEHFETMK	684	0	0	0	0	0	0	0	0	0	0	0	0	0	0	0	0	0	0	2
K	A0A498LM76	Vinculin	subsumed	ILLKNPGNQAAYEHFETMK	ILLK[170]N[115]PGNQAAYEHFETMK	684	0	0	0	0	0	0	0	0	0	0	0	0	0	0	0	0	0	0	4
K	A0A498LM76	Vinculin	subsumed	KLEAMTGSKQAIAK	KLEAMTGSK[170]QAIAK	381	0	0	0	0	0	0	0	0	0	0	0	0	0	0	0	0	0	0	1
K	A0A498LM76	Vinculin	subsumed	LGATAEKAAAVGTANK	LGATAEK[170]AAAVGTANK	646	0	0	0	0	0	0	0	0	0	0	0	0	0	0	0	0	0	0	1
K	A0A498LM76	Vinculin	subsumed	LVQAAQMLKADPYSVQAR	LVQAAQMLK[170]ADPYSVQAR	96	0	0	0	0	0	0	0	0	0	0	0	0	0	0	0	0	0	0	3
K	A0A498LM76	Vinculin	subsumed	MAQAKNWLRDPHAQPGDPGEQAIR	MAQAK[170]N[115]WLRDPHAQPGDPGEQAIR	281	0	0	0	0	0	0	0	0	0	0	0	0	0	0	0	0	0	0	1
K	A0A498LM76	Vinculin	subsumed	NFTVEKMSAEINEIIR	NFTVEK[170]MSAEINEIIR	236	0	0	0	0	0	0	0	0	0	0	0	0	0	0	0	0	0	0	2
K	A0A498LM76	Vinculin	subsumed	RIDAAQSWLADPHGGPEGEENIKALLGEAR	RIDAAQSWLADPHGGPEGEEN[115]IK[170]ALLGEAR	409	0	0	0	0	0	0	0	0	0	0	0	0	0	0	0	0	0	0	2
K	A0A498LM76	Vinculin	subsumed	TISPMVMDAKAVAANIQDQGLQR	TISPMVMDAK[170]AVAANIQDQGLQR	802	0	0	0	0	0	0	0	0	0	0	0	0	0	0	0	0	0	0	4
K	A0A498LM76	Vinculin	subsumed	VGKETVQTTEDAIMR	n[43]VGK[170]ETVQTTEDAIMR	57, 59	0	0	0	0	0	0	0	0	0	0	0	0	0	0	0	0	0	0	4
K	A0A498LM76	Vinculin	subsumed	VMLVNSMNTVKELLPVLISGIK	VMLVNSMNTVK[170]ELLPVLISGIK	199	0	0	0	0	0	0	0	0	0	0	0	0	0	0	0	0	0	0	2
K	A0A498LMD3	Vinculin	representative	AAAVGTANKSTVEGIQAAVK	AAAVGTANK[170]STVEGIQAAVK	655	0	0	0	0	0	0	0	0	0	0	0	0	0	0	0	0	0	0	7
K	A0A498LMD3	Vinculin	representative	AAAVGTANKSTVEGIQAAVK	AAAVGTAN[115]K[170]STVEGIQAAVK	655	0	0	0	0	0	0	0	0	0	0	0	0	0	0	0	0	0	0	2
K	A0A498LMD3	Vinculin	representative	ALAKQIATALQNLQSK	ALAK[170]QIATALQNLQSK	464	0	0	0	0	0	0	0	0	0	0	0	0	0	0	0	0	0	0	3
K	A0A498LMD3	Vinculin	representative	AQQVSQGLDVLTGKVENAAR	AQQVSQGLDVLTGK[170]VENAAR	366	0	0	0	0	0	0	0	0	0	0	0	0	0	0	0	0	0	0	3
K	A0A498LMD3	Vinculin	representative	AQQVSQGLDVLTGKVENAAR	AQQVSQGLDVLTGK[170]VEN[115]AAR	366	0	0	0	0	0	0	0	0	0	0	0	0	0	0	0	0	0	0	2
K	A0A498LMD3	Vinculin	representative	DIVGTAKTLGQLTEQVSDLR	DIVGTAK[170]TLGQLTEQVSDLR	326	0	0	0	0	0	0	0	0	0	0	0	0	0	0	0	0	0	0	7
K	A0A498LMD3	Vinculin	representative	DLDKCQVAMANHQPQMLVAGATSIAR	DLDK[170]C[160]QVAMAN[115]HQPQMLVAGATSIAR	736	0	0	0	0	0	0	0	0	0	0	0	0	0	0	0	0	0	0	2
K	A0A498LMD3	Vinculin	representative	DLDKCQVAMANHQPQMLVAGATSIAR	n[43]DLDK[170]C[160]QVAMAN[115]HQPQMLVAGATSIAR	733, 736	0	0	0	0	0	0	0	0	0	0	0	0	0	0	0	0	0	0	2
K	A0A498LMD3	Vinculin	representative	GSGTSPVAIQKAQQVSQGLDVLTGK	GSGTSPVAIQK[170]AQQVSQGLDVLTGK	352	0	0	0	0	0	0	0	0	0	0	0	0	0	0	0	0	0	0	4
K	A0A498LMD3	Vinculin	representative	GSGTSPVAIQKAQQVSQGLDVLTGK	n[43]GSGTSPVAIQK[170]AQQVSQGLDVLTGK	342, 352	0	0	0	0	0	0	0	0	0	0	0	0	0	0	0	0	0	0	2
K	A0A498LMD3	Vinculin	representative	ILLKNPGNQAAYEHFETMK	ILLK[170]NPGNQAAYEHFETMK	684	0	0	0	0	0	0	0	0	0	0	0	0	0	0	0	0	0	0	2
K	A0A498LMD3	Vinculin	representative	ILLKNPGNQAAYEHFETMK	ILLK[170]N[115]PGNQAAYEHFETMK	684	0	0	0	0	0	0	0	0	0	0	0	0	0	0	0	0	0	0	4
K	A0A498LMD3	Vinculin	representative	KLEAMTGSKQAIAK	KLEAMTGSK[170]QAIAK	381	0	0	0	0	0	0	0	0	0	0	0	0	0	0	0	0	0	0	1
K	A0A498LMD3	Vinculin	representative	LGATAEKAAAVGTANK	LGATAEK[170]AAAVGTANK	646	0	0	0	0	0	0	0	0	0	0	0	0	0	0	0	0	0	0	1
K	A0A498LMD3	Vinculin	representative	LVQAAQMLKADPYSVQAR	LVQAAQMLK[170]ADPYSVQAR	96	0	0	0	0	0	0	0	0	0	0	0	0	0	0	0	0	0	0	3
K	A0A498LMD3	Vinculin	representative	MAQAKNWLRDPHAQPGDPGEQAIR	MAQAK[170]N[115]WLRDPHAQPGDPGEQAIR	281	0	0	0	0	0	0	0	0	0	0	0	0	0	0	0	0	0	0	1
K	A0A498LMD3	Vinculin	representative	NFTVEKMSAEINEIIR	NFTVEK[170]MSAEINEIIR	236	0	0	0	0	0	0	0	0	0	0	0	0	0	0	0	0	0	0	2
K	A0A498LMD3	Vinculin	representative	RIDAAQSWLADPHGGPEGEENIKALLGEAR	RIDAAQSWLADPHGGPEGEEN[115]IK[170]ALLGEAR	409	0	0	0	0	0	0	0	0	0	0	0	0	0	0	0	0	0	0	2
K	A0A498LMD3	Vinculin	representative	TISPMVMDAKAVAANIQDQGLQR	TISPMVMDAK[170]AVAANIQDQGLQR	802	0	0	0	0	0	0	0	0	0	0	0	0	0	0	0	0	0	0	4
K	A0A498LMD3	Vinculin	representative	VGKETVQTTEDAIMR	n[43]VGK[170]ETVQTTEDAIMR	57, 59	0	0	0	0	0	0	0	0	0	0	0	0	0	0	0	0	0	0	4
K	A0A498LMD3	Vinculin	representative	VMLVNSMNTVKELLPVLISGIK	VMLVNSMNTVK[170]ELLPVLISGIK	199	0	0	0	0	0	0	0	0	0	0	0	0	0	0	0	0	0	0	2
K	A0A498LMH4	Ras-related Rab-1A	canonical	VVDYTTAKEFADSLGIPFLETSAK	VVDYTTAK[170]EFADSLGIPFLETSAK	137	0	0	0	0	0	0	0	0	0	0	0	0	0	0	0	0	0	0	1
K	A0A498LMI1	Myosin heavy fast skeletal muscle-like protein	subsumed	MQGSLEDQIIAANPLLEAYGNAKTVR	M[147]QGSLEDQIIAANPLLEAYGN[115]AK[170]TVR	236	0	0	1	0	0	0	0	0	0	0	0	0	0	0	0	0	0	0	0
K	A0A498LMI1	Myosin heavy fast skeletal muscle-like protein	subsumed	TLTVKEDDIHPMNPPKFDK	TLTVKEDDIHPMN[115]PPK[170]FDK	83	0	0	0	0	1	0	0	0	0	0	0	0	0	0	0	0	0	0	0
K	A0A498LMI1	Myosin heavy fast skeletal muscle-like protein	subsumed	TVNTKRVIQYFATVGAMSGPK	n[43]TVN[115]TK[170]RVIQYFATVGAMSGPK	185, 189	2	0	2	0	0	0	0	0	0	0	0	0	0	0	0	0	0	0	0
K	A0A498LMJ4	Elongation factor 1-alpha 2	representative	FEKEAAEMGK	n[43]FEK[170]EAAEMGK	201, 203	0	0	0	0	0	0	0	0	0	0	0	0	0	0	0	2	0	0	0
K	A0A498LMJ4	Elongation factor 1-alpha 2	representative	KEQHASGVTLLEALDTIMPPTRPTDKPLR	KEQHASGVTLLEALDTIMPPTR[170]PTDK[170]PLR	403	0	0	0	0	0	0	1	0	0	0	0	0	0	0	0	0	0	0	0
K	A0A498LMJ4	Elongation factor 1-alpha 2	representative	LPLQDVYKIGGIGTVPVGR	LPLQDVYK[170]IGGIGTVPVGR	414	3	0	1	0	0	0	0	0	0	0	0	0	0	1	1	10	0	0	12
K	A0A498LMJ4	Elongation factor 1-alpha 2	representative	LPLQDVYKIGGIGTVPVGR	n[43]LPLQDVYK[170]IGGIGTVPVGR	407, 414	0	0	2	0	0	0	0	0	0	0	0	0	0	0	0	0	0	0	0
K	A0A498LMJ4	Elongation factor 1-alpha 2	representative	SGDAAIVDMIPGKPMCVESFSQYPPLGR	SGDAAIVDMIPGK[170]PM[147]C[160]VESFSQYPPLGR	567	0	0	0	0	0	0	1	0	0	0	0	0	0	0	0	0	0	0	0
K	A0A498LMJ4	Elongation factor 1-alpha 2	representative	TIEKFEKEAAEMGK	TIEKFEK[170]EAAEMGK	203	0	0	0	0	0	0	0	0	0	0	0	0	0	0	0	0	0	0	1
K	A0A498LMJ4	Elongation factor 1-alpha 2	representative	TIEKFEKEAAEMGK	TIEK[170]FEKEAAEMGK	200	0	0	0	0	0	0	0	0	0	0	0	0	0	1	0	2	0	0	3
K	A0A498LMJ4	Elongation factor 1-alpha 2	representative	TIEKFEKEAAEMGK	TIEK[170]FEKEAAEM[147]GK	200	0	0	1	0	0	0	0	0	0	0	0	0	0	0	0	1	0	0	0
K	A0A498LMJ4	Elongation factor 1-alpha 2	representative	TIEKFEKEAAEMGK	n[43]TIEK[170]FEKEAAEMGK	197, 200	0	0	0	0	0	0	0	0	0	0	0	0	0	8	0	8	0	0	8
K	A0A498LMP6	Myosin heavy fast skeletal muscle	marginally distinguished	ADIAESQVNKLR	ADIAESQVN[115]K[170]LR	156, 200	0	0	6	0	0	0	0	0	0	0	0	0	0	0	0	0	0	0	0
K	A0A498LMP6	Myosin heavy fast skeletal muscle	marginally distinguished	LQDLVDKLQLKVK	LQDLVDKLQLK[170]VK	111	0	0	0	0	0	0	0	0	0	0	0	0	0	0	0	0	1	0	0
K	A0A498LMP6	Myosin heavy fast skeletal muscle	marginally distinguished	TLTVKEDDIHPMNPPKFDK	TLTVKEDDIHPMN[115]PPK[170]FDK	297	0	0	0	0	1	0	0	0	0	0	0	0	0	0	0	0	0	0	0
K	A0A498LMQ3	Enolase isoform X1	canonical	AAVPSGASTGIYEALELRDNDKTR	AAVPSGASTGIYEALELRDN[115]DK[170]TR	54	0	0	1	0	0	0	1	0	0	0	0	0	0	0	0	0	0	0	0
K	A0A498LMQ3	Enolase isoform X1	canonical	AAVPSGASTGIYEALELRDNDKTR	AAVPSGASTGIYEALELR[170]DN[115]DK[170]TR	54	0	0	0	0	0	0	6	0	0	1	0	0	0	0	0	0	0	0	0
K	A0A498LMQ3	Enolase isoform X1	canonical	AGAAEKGVPLYR	AGAAEK[170]GVPLYR	126	0	0	0	0	0	0	0	0	0	0	0	0	0	0	0	1	0	0	0
K	A0A498LMQ3	Enolase isoform X1	canonical	AVEHINKTIAPALVSQNVSVLEQEK	AVEHIN[115]K[170]TIAPALVSQNVSVLEQEK	71	0	0	1	0	0	0	0	0	0	0	1	0	0	0	0	0	0	0	0
K	A0A498LMQ3	Enolase isoform X1	canonical	AVEHINKTIAPALVSQNVSVLEQEKIDK	AVEHIN[115]K[170]TIAPALVSQNVSVLEQEKIDK	71	0	0	0	0	0	0	0	0	0	0	1	0	0	0	0	0	0	0	0
K	A0A498LMQ3	Enolase isoform X1	canonical	DATNVGDEGGFAPNILENKEALELLK	DATNVGDEGGFAPNILEN[115]K[142]EALELLK[170]	228	0	0	0	0	0	0	1	0	0	0	0	0	0	0	0	0	0	0	0
K	A0A498LMQ3	Enolase isoform X1	canonical	DATNVGDEGGFAPNILENKEALELLK	DATNVGDEGGFAPNILEN[115]K[170]EALELLK	221	0	0	0	0	1	0	0	0	0	0	0	0	0	0	0	1	1	0	2
K	A0A498LMQ3	Enolase isoform X1	canonical	DATNVGDEGGFAPNILENKEALELLK	DATNVGDEGGFAPN[115]ILENK[170]EALELLK	221	0	0	1	0	1	0	0	0	0	0	0	0	0	0	0	0	0	0	0
K	A0A498LMQ3	Enolase isoform X1	canonical	GGKYDLDFKSPDDPSR	GGKYDLDFK[170]SPDDPSR	262	0	0	1	0	0	0	0	0	0	0	0	0	0	0	0	0	0	0	1
K	A0A498LMQ3	Enolase isoform X1	canonical	GGKYDLDFKSPDDPSR	GGK[170]YDLDFKSPDDPSR	256	0	0	0	0	0	0	0	0	0	0	0	0	0	0	0	0	1	0	0
K	A0A498LMQ3	Enolase isoform X1	canonical	IGAEVYHNLKNVIK	IGAEVYHNLK[170]N[115]VIK	193	0	0	2	0	1	0	0	0	0	0	1	0	0	1	0	1	0	0	2
K	A0A498LMQ3	Enolase isoform X1	canonical	IGAEVYHNLKNVIK	IGAEVYHN[115]LK[170]NVIK	193	0	0	0	0	0	0	0	0	1	0	0	0	0	0	0	0	0	0	0
K	A0A498LMQ3	Enolase isoform X1	canonical	IGAEVYHNLKNVIK	IGAEVYHN[115]LK[170]NVIK[142]	193	0	0	0	0	1	0	0	0	0	0	0	0	0	0	0	0	0	0	0
K	A0A498LMQ3	Enolase isoform X1	canonical	LAMQEFMILPVGASNFK	LAMQEFMILPVGASN[115]FK[170]	179	0	0	0	0	0	0	0	0	0	0	0	0	0	0	2	0	0	0	1
K	A0A498LMQ3	Enolase isoform X1	canonical	LAMQEFMILPVGASNFK	LAMQEFM[147]ILPVGASN[115]FK[170]	179	0	0	0	0	0	0	0	0	0	0	0	0	0	0	2	0	0	0	0
K	A0A498LMQ3	Enolase isoform X1	canonical	LAMQEFMILPVGASNFKEAMR	LAMQEFMILPVGASN[115]FK[170]EAMR	179	0	0	1	0	0	0	0	0	0	0	1	0	0	0	0	0	0	0	2
K	A0A498LMQ3	Enolase isoform X1	canonical	SGETEDTFIADLVVGLCTGQIKTGAPCR	SGETEDTFIADLVVGLC[160]TGQIK[170]TGAPC[160]R	394	2	0	2	0	1	0	0	0	0	0	0	0	0	0	0	0	0	0	0
K	A0A498LMQ3	Enolase isoform X1	canonical	TIAPALVSQNVSVLEQEKIDKLMLDMDGTENK	TIAPALVSQNVSVLEQEKIDKLMLDMDGTEN[115]K[170]	103	0	0	0	0	0	0	1	0	0	0	0	0	0	0	0	0	0	0	0
K	A0A498LMQ3	Enolase isoform X1	canonical	TIAPALVSQNVSVLEQEKIDKLMLDMDGTENK	TIAPALVSQNVSVLEQEK[170]IDKLMLDMDGTENK	89	0	0	0	0	0	0	0	0	0	0	1	0	0	0	0	0	0	0	1
K	A0A498LMQ3	Enolase isoform X1	canonical	TIAPALVSQNVSVLEQEKIDKLMLDMDGTENK	TIAPALVSQNVSVLEQEK[170]IDKLM[147]LDMDGTENK	89	0	0	0	0	0	0	1	0	0	0	0	0	0	0	0	0	0	0	0
K	A0A498LMQ3	Enolase isoform X1	canonical	YGKDATNVGDEGGFAPNILENKEALELLK	YGKDATNVGDEGGFAPNILENK[170]EALELLK	221	0	0	1	0	0	0	0	0	0	0	0	0	0	0	0	0	0	0	0
K	A0A498LMQ3	Enolase isoform X1	canonical	YGKDATNVGDEGGFAPNILENKEALELLK	YGKDATNVGDEGGFAPNILEN[115]K[170]EALELLK	221	0	0	0	0	0	0	1	0	0	0	0	0	0	0	0	0	0	0	0
K	A0A498LMQ3	Enolase isoform X1	canonical	YGKDATNVGDEGGFAPNILENKEALELLK	YGKDATNVGDEGGFAPN[115]ILEN[115]K[170]EALELLK	221	0	0	1	0	0	0	0	0	0	0	0	0	0	0	0	0	0	0	0
K	A0A498LMQ4	Erythrocyte band 7 integral membrane-like protein	canonical	ALKEASLVIAESPSALQLR	ALK[170]EASLVIAESPSALQLR	233	0	0	0	0	0	0	0	0	0	0	0	0	0	0	0	0	0	0	1
K	A0A498LMR0	Type I cytoskeletal 13-like protein	marginally distinguished	IILQIDNAKLAAEDFR	IILQIDNAK[170]LAAEDFR	163	0	0	2	0	0	0	0	0	0	0	0	0	0	0	0	0	0	0	0
K	A0A498LMT1	Histone H2B	marginally distinguished	DNIQGITKPAIR	DNIQGITK[170]PAIR	156	0	0	0	3	0	0	2	1	0	2	1	1	0	0	0	0	0	0	3
K	A0A498LMT1	Histone H2B	marginally distinguished	DNIQGITKPAIR	DNIQGITK[170]PAIR[170]	156	0	2	0	0	0	0	0	0	0	0	0	0	0	0	0	0	0	0	0
K	A0A498LMT1	Histone H2B	marginally distinguished	DNIQGITKPAIRR	DNIQGITK[170]PAIRR	156	0	0	0	0	0	0	0	0	0	1	0	0	0	0	0	0	0	0	0
K	A0A498LMT1	Histone H2B	marginally distinguished	HAVSEGTKAVTK	HAVSEGTK[170]AVTK	115	0	0	0	0	0	0	0	0	0	0	0	0	0	0	0	0	3	0	1
K	A0A498LMT1	Histone H2B	marginally distinguished	KESYAIYVYK	n[15]K[170]ESYAIYVYK	33	0	1	0	0	0	0	0	0	0	0	0	0	0	0	1	0	0	0	0
K	A0A498LMT1	Histone H2B	marginally distinguished	KVLRDNIQGITKPAIR	n[15]K[170]VLRDNIQGITKPAIR	145	0	0	0	0	0	0	0	0	0	1	0	0	0	0	0	0	0	0	0
K	A0A498LMT1	Histone H2B	marginally distinguished	KVLRDNIQGITKPAIR	n[15]K[170]VLR[170]DN[115]IQGITKPAIR	145	0	0	0	0	0	0	0	0	0	1	0	0	0	0	0	0	0	0	0
K	A0A498LMT1	Histone H2B	marginally distinguished	KVLRDNIQGITKPAIR	n[43]KVLRDNIQGITK[170]PAIR	145, 156	0	0	0	0	0	0	0	0	0	0	0	0	0	0	0	2	0	0	0
K	A0A498LMT1	Histone H2B	marginally distinguished	KVLRDNIQGITKPAIR	n[43]K[170]VLRDNIQGITKPAIR	145	0	0	0	0	0	0	0	0	0	2	0	0	0	0	0	0	0	0	0
K	A0A498LMT1	Histone H2B	marginally distinguished	LLLPGELAKHAVSEGTK	LLLPGELAK[170]HAVSEGTK	107	0	0	0	0	0	0	0	0	0	0	1	1	0	0	0	2	2	0	2
K	A0A498LMT1	Histone H2B	marginally distinguished	LLLPGELAKHAVSEGTKAVTK	LLLPGELAK[170]HAVSEGTKAVTK	107	0	0	0	0	0	0	0	0	0	0	0	0	0	0	0	0	0	0	1
K	A0A498LMT1	Histone H2B	marginally distinguished	QVHPDTGISSKAMGIMNSFVNDIFER	QVHPDTGISSK[170]AMGIMNSFVNDIFER	56	0	0	0	0	0	0	0	0	0	0	0	0	0	0	0	0	0	0	1
K	A0A498LMT1	Histone H2B	marginally distinguished	QVHPDTGISSKAMGIMNSFVNDIFER	QVHPDTGISSK[170]AMGIMN[115]SFVNDIFER	56	0	0	0	0	0	0	0	0	0	0	0	0	0	0	0	0	1	0	0
K	A0A498LMT1	Histone H2B	marginally distinguished	QVHPDTGISSKAMGIMNSFVNDIFER	QVHPDTGISSK[170]AM[147]GIMNSFVNDIFER	56	0	0	0	0	0	0	0	0	0	0	0	0	0	0	0	1	0	0	0
K	A0A498LMT1	Histone H2B	marginally distinguished	QVHPDTGISSKAMGIMNSFVNDIFER	Q[111]VHPDTGISSK[170]AMGIMNSFVNDIFER	56	0	0	0	0	0	0	0	0	0	0	0	0	0	0	0	0	0	0	1
K	A0A498LMT1	Histone H2B	marginally distinguished	QVHPDTGISSKAMGIMNSFVNDIFER	Q[111]VHPDTGISSK[170]AM[147]GIMN[115]SFVNDIFER	56	0	0	0	0	0	0	0	0	0	0	0	0	0	0	0	0	0	0	1
K	A0A498LMT1	Histone H2B	marginally distinguished	VLKQVHPDTGISSK	VLK[170]QVHPDTGISSK	45	0	0	0	2	0	0	0	0	1	0	0	3	0	2	0	0	6	0	4
K	A0A498LMT1	Histone H2B	marginally distinguished	VLKQVHPDTGISSK	n[43]VLK[170]QVHPDTGISSK	43, 45	0	0	2	0	0	0	0	0	0	4	2	0	0	0	0	2	8	0	8
K	A0A498LMT8	Beta-crystallin B3-like protein	canonical	GFLGEQFVLEKGEYPR	n[43]GFLGEQFVLEK[170]GEYPR	402, 412	0	0	6	0	0	0	0	0	0	0	0	0	0	2	0	0	0	0	0
K	A0A498LMT8	Beta-crystallin B3-like protein	canonical	KMEIVDDDIPSLWVHGFQDHVASAK	n[15]K[170]MEIVDDDIPSLWVHGFQDHVASAK	457	0	0	2	0	0	0	0	0	0	0	0	0	0	0	0	0	0	0	0
K	A0A498LMT8	Beta-crystallin B3-like protein	canonical	NLEKVASIIVESGPWVAFEQK	NLEK[170]VASIIVESGPWVAFEQK	384	0	0	1	0	0	0	0	0	0	0	0	0	0	0	0	0	0	0	0
K	A0A498LMT8	Beta-crystallin B3-like protein	canonical	NLEKVASIIVESGPWVAFEQK	N[115]LEK[170]VASIIVESGPWVAFEQK	384	0	0	7	0	0	0	0	0	0	0	0	0	0	2	0	0	0	0	0
K	A0A498LMT8	Beta-crystallin B3-like protein	canonical	NLEKVASIIVESGPWVAFEQK	n[43]N[115]LEK[170]VASIIVESGPWVAFEQK	381, 384	0	0	0	0	0	0	0	0	0	0	0	0	0	2	0	0	0	0	0
K	A0A498LMT8	Beta-crystallin B3-like protein	canonical	SQGGAGAVYKVSLFEFENFR	SQGGAGAVYK[170]VSLFEFENFR	354	0	0	4	0	0	0	0	0	0	0	0	0	0	0	0	0	0	0	0
K	A0A498LMT8	Beta-crystallin B3-like protein	canonical	SQGGAGAVYKVSLFEFENFRGK	SQGGAGAVYK[170]VSLFEFENFRGK	354	0	0	5	0	0	0	0	0	0	0	0	0	0	0	0	0	0	0	0
K	A0A498LMT8	Beta-crystallin B3-like protein	canonical	SQGGAGAVYKVSLFEFENFRGK	n[43]SQGGAGAVYK[170]VSLFEFENFRGK	345, 354	0	0	2	0	0	0	0	0	0	0	0	0	0	0	0	0	0	0	0
K	A0A498LMT8	Beta-crystallin B3-like protein	canonical	VASIIVESGPWVAFEQKGFLGEQFVLEKGEYPR	VASIIVESGPWVAFEQK[170]GFLGEQFVLEKGEYPR	401	0	0	1	0	0	0	0	0	0	0	0	0	0	0	0	0	0	0	0
K	A0A498LN12	Vigilin isoform X1	subsumed	EAPWATGNEKAPDMSSSEEFPSFGAPVTNAR	EAPW[202]ATGNEK[170]APDM[147]SSSE[111]EFPSFGAPVTNAR	241	0	0	0	0	0	0	0	0	0	0	0	0	0	0	0	1	0	0	0
K	A0A498LN29	Zonadhesin-like isoform X1	canonical	SSVKPENLRPHMESISSTSESSSTEPEKPSAR	SSVK[170]PENLR[170]PHMESISSTSESSSTEPEKPSAR	932	0	0	0	0	0	0	0	0	0	0	0	0	0	0	0	0	0	2	0
K	A0A498LN29	Zonadhesin-like isoform X1	canonical	SSVKPENLRPHMESISSTSESSSTEPEKPSAR	SSVK[170]PEN[115]LR[170]PHMESISSTSESSSTEPEKPSAR	932	0	0	0	0	0	0	0	0	0	0	0	0	0	0	0	0	0	1	0
K	A0A498LN29	Zonadhesin-like isoform X1	canonical	SSVKPENLRPHMESISSTSESSSTEPEKPSAR	n[15]SSVK[170]PEN[115]LRPHMESISSTSESSSTEPEKPSAR	932	0	0	0	0	0	0	0	0	0	0	0	0	0	0	0	0	0	1	0
K	A0A498LN29	Zonadhesin-like isoform X1	canonical	SSVKPENLRPHMESISSTSESSSTEPEKPSAR	n[43]SSVK[170]PEN[115]LRPHMESISSTSESSSTEPEKPSAR	929, 932	0	0	0	0	0	0	0	0	0	0	0	0	0	0	0	0	0	2	0
K	A0A498LN29	Zonadhesin-like isoform X1	canonical	TSLTPEKPGSSVPVEHSPNSNLAKPNSELEK	TSLTPEKPGSSVPVEHSPN[115]SNLAK[170]PNSELEK[142]	331	0	0	0	0	0	0	0	0	0	0	0	0	0	0	0	0	0	1	0
K	A0A498LN29	Zonadhesin-like isoform X1	canonical	TVIPAEPSSSLHYEKPSSNQEKPSILLEPR	TVIPAEPSSSLHYEK[170]PSSN[115]QEKPSILLEPR	177	0	0	0	0	0	0	0	0	0	0	0	0	0	0	0	0	0	1	0
K	A0A498LN53	Cytochrome heme mitochondrial-like protein	canonical	TLAEEVEVVDGPDDTGEMFTRPGKPSDYFPKPYANPEAAR	TLAEEVEVVDGPDDTGEMFTR[170]PGK[170]PSDYFPKPYANPEAAR	188	0	0	0	0	0	0	0	0	0	0	0	0	0	0	0	0	0	1	0
K	A0A498LN53	Cytochrome heme mitochondrial-like protein	canonical	TLAEEVEVVDGPDDTGEMFTRPGKPSDYFPKPYANPEAAR	TLAEEVEVVDGPDDTGEM[147]FTRPGK[170]PSDYFPKPYANPEAAR	188	0	0	0	0	0	0	0	0	0	1	0	0	0	0	0	0	0	0	0
K	A0A498LN73	Phosphoglycerate mutase (EC 5.4.2.11) (EC 5.4.2.4)	canonical	HYGGLTGLNKAETAAK	HYGGLTGLNK[170]AETAAK	100	3	0	0	0	0	0	0	0	0	0	0	0	0	0	0	0	0	0	2
K	A0A498LN73	Phosphoglycerate mutase (EC 5.4.2.11) (EC 5.4.2.4)	canonical	HYGGLTGLNKAETAAK	HYGGLTGLN[115]K[170]AETAAK	100	1	0	0	0	1	0	0	0	0	0	0	0	0	0	0	2	1	0	0
K	A0A498LN73	Phosphoglycerate mutase (EC 5.4.2.11) (EC 5.4.2.4)	canonical	HYGGLTGLNKAETAAKHGEAQVK	HYGGLTGLN[115]KAETAAK[170]HGEAQVK	106	0	0	0	0	0	0	0	0	0	0	0	0	0	0	0	1	0	0	1
K	A0A498LN73	Phosphoglycerate mutase (EC 5.4.2.11) (EC 5.4.2.4)	canonical	HYGGLTGLNKAETAAKHGEAQVK	HYGGLTGLN[115]K[170]AETAAKHGEAQVK	100	0	0	0	0	0	0	0	0	0	0	0	0	0	0	0	1	0	0	0
K	A0A498LN73	Phosphoglycerate mutase (EC 5.4.2.11) (EC 5.4.2.4)	canonical	NLKPVKPMQFLGDEETVRK	NLK[170]PVKPMQFLGDEETVRK	225	0	0	0	0	0	0	0	0	0	0	2	0	0	0	0	0	0	0	0
K	A0A498LN76	ADP ATP translocase 2	canonical	AFFKGAWSNVLR	AFFK[170]GAWSNVLR	248	0	0	0	0	0	0	0	0	0	0	0	0	0	0	0	1	0	0	0
K	A0A498LN76	ADP ATP translocase 2	canonical	DEGGKAFFKGAWSNVLR	DEGGKAFFK[170]GAWSNVLR	248	0	0	1	0	0	0	0	0	0	0	1	0	0	0	0	2	0	0	0
K	A0A498LN83	Alpha cardiac	representative	AVFPSIVGRPRHQGVMVGMGQKDSYVGDEAQSK	n[43]AVFPSIVGR[170]PRHQGVM[147]VGMGQK[170]DSYVGDEAQSK	31, 52	2	0	0	0	0	0	0	0	0	0	0	0	0	0	0	0	0	0	0
K	A0A498LN83	Alpha cardiac	representative	CDIDIRKDLYANNVLSGGTTMYPGIADR	C[160]DIDIRK[170]DLYANNVLSGGTTMYPGIADR	293	0	0	0	0	0	0	0	1	0	0	0	0	0	0	0	0	0	0	0
K	A0A498LN83	Alpha cardiac	representative	CDIDIRKDLYANNVLSGGTTMYPGIADR	C[160]DIDIR[170]K[170]DLYANNVLSGGTTMYPGIADR	293	0	0	0	1	0	0	0	0	0	1	0	0	0	0	0	0	0	0	0
K	A0A498LN83	Alpha cardiac	representative	CDIDIRKDLYANNVLSGGTTMYPGIADR	C[160]DIDIR[170]K[170]DLYAN[115]NVLSGGTTMYPGIADR	293	0	0	0	5	2	0	0	1	0	0	0	0	0	0	0	0	0	0	0
K	A0A498LN83	Alpha cardiac	representative	CPETLFQPSFIGMESAGIHETAYNSIMK	C[143]PETLFQPSFIGMESAGIHETAYNSIMK[170]	286	0	0	0	0	1	0	0	0	0	0	0	0	0	0	0	0	0	0	0
K	A0A498LN83	Alpha cardiac	representative	CPETLFQPSFIGMESAGIHETAYNSIMK	C[143]PETLFQPSFIGMESAGIHETAYNSIM[147]K[170]	286	1	0	0	0	0	0	0	0	0	0	0	0	0	0	0	0	0	0	0
K	A0A498LN83	Alpha cardiac	representative	CPETLFQPSFIGMESAGIHETAYNSIMK	C[143]PETLFQPSFIGMESAGIHETAYN[115]SIMK[170]	286	1	0	0	0	0	0	0	0	0	0	0	0	0	0	0	0	0	0	0
K	A0A498LN83	Alpha cardiac	representative	CPETLFQPSFIGMESAGIHETAYNSIMK	C[143]PETLFQPSFIGM[147]ESAGIHETAYNSIMK[170]	286	0	0	0	0	3	0	0	0	0	0	0	0	0	0	0	0	0	0	0
K	A0A498LN83	Alpha cardiac	representative	CPETLFQPSFIGMESAGIHETAYNSIMK	C[160]PETLFQPSFIGMESAGIHETAYNSIM[147]K[170]	286	1	0	0	0	0	0	0	0	0	0	0	0	0	0	0	0	0	0	0
K	A0A498LN83	Alpha cardiac	representative	CPETLFQPSFIGMESAGIHETAYNSIMK	C[160]PETLFQPSFIGMESAGIHETAYN[115]SIMK[170]	286	5	0	0	0	4	0	0	0	0	0	0	0	0	0	0	0	0	0	0
K	A0A498LN83	Alpha cardiac	representative	CPETLFQPSFIGMESAGIHETAYNSIMK	C[160]PETLFQPSFIGM[147]ESAGIHETAYNSIMK[170]	286	12	0	1	0	5	0	0	1	0	1	0	0	0	0	0	0	0	0	0
K	A0A498LN83	Alpha cardiac	representative	CPETLFQPSFIGMESAGIHETAYNSIMK	C[160]PETLFQPSFIGM[147]ESAGIHETAYNSIM[147]K[170]	286	3	0	0	1	1	0	0	0	0	0	0	0	0	0	0	0	0	0	0
K	A0A498LN83	Alpha cardiac	representative	CPETLFQPSFIGMESAGIHETAYNSIMK	C[160]PETLFQPSFIGM[147]ESAGIHETAYN[115]SIMK[170]	286	1	0	0	0	1	0	0	0	0	0	0	0	0	0	0	0	0	0	0
K	A0A498LN83	Alpha cardiac	representative	CPETLFQPSFIGMESAGIHETAYNSIMK	n[43]C[160]PETLFQPSFIGM[147]ESAGIHETAYNSIMK[170]	259, 286	2	0	0	0	0	0	0	0	0	0	0	0	0	0	0	0	0	0	0
K	A0A498LN83	Alpha cardiac	representative	DIKEKLCYVALDFENEMATAASSSSLEK	DIKEK[170]LC[160]YVALDFENEMATAASSSSLEK	217	0	0	0	0	0	0	0	1	0	0	0	0	0	0	0	0	0	0	0
K	A0A498LN83	Alpha cardiac	representative	DIKEKLCYVALDFENEMATAASSSSLEK	DIK[170]EKLC[160]YVALDFENEMATAASSSSLEK	215	1	0	0	0	0	0	0	0	0	0	0	0	0	0	0	0	0	0	0
K	A0A498LN83	Alpha cardiac	representative	DIKEKLCYVALDFENEMATAASSSSLEK	n[43]DIKEK[170]LC[160]YVALDFEN[115]EMATAASSSSLEK	213, 217	0	0	0	0	0	0	0	4	0	0	0	0	0	0	0	0	0	0	0
K	A0A498LN83	Alpha cardiac	representative	DIKEKLCYVALDFENEMATAASSSSLEK	n[43]DIK[170]EKLC[160]YVALDFENEMATAASSSSLEK	213, 215	4	0	0	12	8	0	0	24	0	0	0	0	0	0	0	0	2	0	0
K	A0A498LN83	Alpha cardiac	representative	DIKEKLCYVALDFENEMATAASSSSLEK	n[43]DIK[170]EKLC[160]YVALDFENEM[147]ATAASSSSLEK	213, 215	0	0	0	0	0	0	0	2	0	0	0	0	0	0	0	0	0	0	0
K	A0A498LN83	Alpha cardiac	representative	DIKEKLCYVALDFENEMATAASSSSLEK	n[43]DIK[170]EKLC[160]YVALDFEN[115]EMATAASSSSLEK	213, 215	2	0	0	2	0	0	0	10	0	0	0	0	0	0	0	0	0	0	0
K	A0A498LN83	Alpha cardiac	representative	DLTDYLMK	DLTDYLM[147]K[170]	193	0	0	0	3	0	0	0	5	0	0	0	0	0	0	0	0	0	0	0
K	A0A498LN83	Alpha cardiac	representative	DLTDYLMKILTER	DLTDYLMK[170]ILTER	193	0	0	0	14	1	0	0	2	0	0	0	0	0	0	0	2	2	0	2
K	A0A498LN83	Alpha cardiac	representative	DLTDYLMKILTER	DLTDYLM[147]K[170]ILTER	193	0	0	0	0	0	0	1	1	0	0	0	0	0	0	0	0	0	0	0
K	A0A498LN83	Alpha cardiac	representative	DLTDYLMKILTER	n[43]DLTDYLMK[170]ILTER	186, 193	0	0	0	2	0	0	0	0	0	0	0	0	0	0	0	8	2	0	18
K	A0A498LN83	Alpha cardiac	representative	DSYVGDEAQSKR	DSYVGDEAQSK[170]R	63	6	1	0	4	2	0	2	10	0	1	0	1	0	1	0	1	2	0	2
K	A0A498LN83	Alpha cardiac	representative	DSYVGDEAQSKR	DSYVGDEAQSK[170]R[170]	63	0	1	0	0	0	0	3	0	0	0	0	0	0	0	0	0	0	0	0
K	A0A498LN83	Alpha cardiac	representative	EITALAPSTMKIKIIAPPER	EITALAPSTMK[170]IKIIAPPER	328	0	0	0	0	0	0	0	0	0	0	0	0	0	0	0	0	0	0	1
K	A0A498LN83	Alpha cardiac	representative	EKLCYVALDFENEMATAASSSSLEK	n[15]EK[170]LC[160]YVALDFENEMATAASSSSLEK	217	0	0	0	2	1	0	0	2	0	0	0	0	0	0	0	0	0	0	0
K	A0A498LN83	Alpha cardiac	representative	EKLCYVALDFENEMATAASSSSLEK	n[15]EK[170]LC[160]YVALDFEN[115]EMATAASSSSLEK	217	6	0	0	2	0	0	0	1	0	0	0	0	0	0	0	0	0	0	0
K	A0A498LN83	Alpha cardiac	representative	EKLCYVALDFENEMATAASSSSLEK	n[43]E[111]K[170]LC[160]YVALDFEN[115]EMATAASSSSLEK	216, 217	0	0	0	0	6	0	0	0	0	0	0	0	0	0	0	0	0	0	0
K	A0A498LN83	Alpha cardiac	representative	FRCPETLFQPSFIGMESAGIHETAYNSIMK	FRC[160]PETLFQPSFIGMESAGIHETAYNSIM[147]K[170]	286	18	0	1	0	3	0	0	2	0	0	0	0	0	0	0	0	0	0	0
K	A0A498LN83	Alpha cardiac	representative	FRCPETLFQPSFIGMESAGIHETAYNSIMK	FRC[160]PETLFQPSFIGMESAGIHETAYN[115]SIMK[170]	286	1	0	0	0	1	0	0	0	0	0	0	0	0	0	0	0	0	0	0
K	A0A498LN83	Alpha cardiac	representative	FRCPETLFQPSFIGMESAGIHETAYNSIMK	FRC[160]PETLFQPSFIGMESAGIHETAYN[115]SIM[147]K[170]	286	4	0	0	0	1	0	0	0	0	0	0	0	0	0	0	0	0	0	0
K	A0A498LN83	Alpha cardiac	representative	FRCPETLFQPSFIGMESAGIHETAYNSIMK	FRC[160]PETLFQPSFIGM[147]ESAGIHETAYNSIMK[170]	286	18	0	0	0	3	0	0	0	0	0	0	0	0	0	0	0	0	0	0
K	A0A498LN83	Alpha cardiac	representative	FRCPETLFQPSFIGMESAGIHETAYNSIMK	FRC[160]PETLFQPSFIGM[147]ESAGIHETAYNSIM[147]K[170]	286	1	0	0	2	1	0	0	2	0	2	0	0	0	0	0	0	0	0	0
K	A0A498LN83	Alpha cardiac	representative	FRCPETLFQPSFIGMESAGIHETAYNSIMK	FRC[160]PETLFQPSFIGM[147]ESAGIHETAYN[115]SIMK[170]	286	8	0	0	0	1	0	0	0	0	0	0	0	0	0	0	0	0	0	0
K	A0A498LN83	Alpha cardiac	representative	FRCPETLFQPSFIGMESAGIHETAYNSIMK	n[15]FRC[160]PETLFQPSFIGMESAGIHETAYNSIM[147]K[170]	286	0	0	0	0	1	0	0	0	0	0	0	0	0	0	0	0	0	0	0
K	A0A498LN83	Alpha cardiac	representative	FRCPETLFQPSFIGMESAGIHETAYNSIMK	n[15]FRC[160]PETLFQPSFIGM[147]ESAGIHETAYNSIMK[170]	286	0	0	0	0	1	0	0	0	0	0	0	0	0	0	0	0	0	0	0
K	A0A498LN83	Alpha cardiac	representative	FRCPETLFQPSFIGMESAGIHETAYNSIMK	n[15]FRC[160]PETLFQPSFIGM[147]ESAGIHETAYNSIM[147]K[170]	286	1	0	0	0	0	0	0	0	0	0	0	0	0	0	0	0	0	0	0
K	A0A498LN83	Alpha cardiac	representative	FRCPETLFQPSFIGMESAGIHETAYNSIMK	n[15]FRC[160]PETLFQPSFIGM[147]ESAGIHETAYN[115]SIMK[170]	286	0	0	0	0	1	0	0	0	0	0	0	0	0	0	0	0	0	0	0
K	A0A498LN83	Alpha cardiac	representative	FRCPETLFQPSFIGMESAGIHETAYNSIMKCDIDIR	FRC[160]PETLFQPSFIGMESAGIHETAYNSIM[147]K[170]C[160]DIDIR	286	1	0	0	0	0	0	0	0	0	0	0	0	0	0	0	0	0	0	0
K	A0A498LN83	Alpha cardiac	representative	GILTLKYPIEHGIITNWDDMEK	GILTLK[170]YPIEHGIITNWDDMEK	70	0	0	0	0	0	0	0	0	0	0	0	0	0	0	0	0	1	0	2
K	A0A498LN83	Alpha cardiac	representative	GILTLKYPIEHGIITNWDDMEKIWHHTFYNELR	GILTLK[170]YPIEHGIITNW[202]DDMEKIWHHTFYNELR	70	0	0	0	0	0	0	1	0	0	0	0	0	0	0	0	0	0	0	0
K	A0A498LN83	Alpha cardiac	representative	HQGVMVGMGQK	HQGVMVGM[147]GQK[170]	52	0	0	0	0	1	0	0	4	0	0	0	0	0	0	0	0	0	0	0
K	A0A498LN83	Alpha cardiac	representative	HQGVMVGMGQK	HQGVM[147]VGMGQK[170]	52	0	0	0	1	3	0	0	2	0	0	0	0	0	0	0	0	0	0	0
K	A0A498LN83	Alpha cardiac	representative	HQGVMVGMGQKDSYVGDEAQSK	HQGVMVGMGQK[170]DSYVGDEAQSK	52	14	1	12	0	9	0	1	23	1	2	5	0	0	7	0	10	16	2	32
K	A0A498LN83	Alpha cardiac	representative	HQGVMVGMGQKDSYVGDEAQSK	HQGVMVGMGQK[170]DS[167]Y[243]VGDEAQSK	52	0	0	1	0	0	0	0	0	0	0	0	0	0	0	0	0	0	0	0
K	A0A498LN83	Alpha cardiac	representative	HQGVMVGMGQKDSYVGDEAQSK	HQGVMVGM[147]GQK[170]DSYVGDEAQSK	52	11	0	4	3	3	0	0	11	1	0	6	0	0	1	0	1	1	0	13
K	A0A498LN83	Alpha cardiac	representative	HQGVMVGMGQKDSYVGDEAQSK	HQGVM[147]VGMGQK[170]DSYVGDEAQSK	52	1	0	6	1	6	0	0	4	1	0	6	0	0	0	0	4	1	0	9
K	A0A498LN83	Alpha cardiac	representative	HQGVMVGMGQKDSYVGDEAQSK	HQGVM[147]VGM[147]GQK[170]DSYVGDEAQSK	52	0	0	2	0	5	0	1	12	0	0	0	0	0	0	0	1	1	0	3
K	A0A498LN83	Alpha cardiac	representative	HQGVMVGMGQKDSYVGDEAQSK	n[15]HQGVMVGMGQK[170]DSYVGDEAQSK	52	1	0	0	1	2	0	0	5	0	0	0	0	0	0	0	0	0	0	0
K	A0A498LN83	Alpha cardiac	representative	HQGVMVGMGQKDSYVGDEAQSK	n[15]HQGVMVGM[147]GQK[170]DSYVGDEAQSK	52	0	0	0	0	0	0	0	3	0	0	0	0	0	0	0	0	0	0	0
K	A0A498LN83	Alpha cardiac	representative	HQGVMVGMGQKDSYVGDEAQSK	n[15]HQGVM[147]VGMGQK[170]DSYVGDEAQSK	52	1	0	0	0	1	0	0	5	0	0	0	0	0	0	0	0	0	0	0
K	A0A498LN83	Alpha cardiac	representative	HQGVMVGMGQKDSYVGDEAQSK	n[43]HQGVMVGMGQK[142]DSYVGDEAQSK[170]	42, 63	0	0	0	0	2	0	0	0	0	0	0	0	0	0	0	0	0	0	0
K	A0A498LN83	Alpha cardiac	representative	HQGVMVGMGQKDSYVGDEAQSK	n[43]HQGVMVGMGQK[170]DSYVGDEAQSK	42, 52	2	0	0	0	0	0	0	0	0	0	0	0	0	0	0	0	0	0	0
K	A0A498LN83	Alpha cardiac	representative	HQGVMVGMGQKDSYVGDEAQSK	n[43]HQGVMVGM[147]GQK[170]DSYVGDEAQSK	42, 52	0	0	0	0	2	0	0	2	0	0	0	0	0	0	0	0	0	0	0
K	A0A498LN83	Alpha cardiac	representative	HQGVMVGMGQKDSYVGDEAQSK	n[43]HQGVM[147]VGMGQK[170]DSYVGDEAQSK	42, 52	8	0	6	0	4	0	0	6	0	0	0	0	0	2	0	2	2	0	22
K	A0A498LN83	Alpha cardiac	representative	HQGVMVGMGQKDSYVGDEAQSK	n[43]HQGVM[147]VGM[147]GQK[170]DSYVGDEAQSK	42, 52	0	0	2	0	0	0	0	2	0	0	0	0	0	0	0	0	0	0	8
K	A0A498LN83	Alpha cardiac	representative	HQGVMVGMGQKDSYVGDEAQSKR	HQGVMVGMGQKDSYVGDEAQSK[170]R	63	0	0	3	0	0	0	0	0	0	0	0	0	0	0	0	0	0	0	0
K	A0A498LN83	Alpha cardiac	representative	HQGVMVGMGQKDSYVGDEAQSKR	HQGVMVGMGQKDSYVGDEAQSK[170]R[170]	63	0	0	0	1	0	0	0	0	0	0	0	0	0	0	0	0	0	0	0
K	A0A498LN83	Alpha cardiac	representative	HQGVMVGMGQKDSYVGDEAQSKR	HQGVMVGMGQK[142]DSYVGDEAQSK[170]R	63	0	0	0	0	0	0	0	1	0	0	0	0	0	0	0	0	0	0	0
K	A0A498LN83	Alpha cardiac	representative	HQGVMVGMGQKDSYVGDEAQSKR	HQGVMVGMGQK[170]DSYVGDEAQSKR	52	21	0	19	7	6	0	8	22	2	1	19	0	0	6	0	14	18	1	50
K	A0A498LN83	Alpha cardiac	representative	HQGVMVGMGQKDSYVGDEAQSKR	HQGVMVGMGQK[170]DSYVGDEAQSK[170]R	52, 63	0	0	4	0	0	0	0	0	0	0	0	0	0	0	0	0	0	0	28
K	A0A498LN83	Alpha cardiac	representative	HQGVMVGMGQKDSYVGDEAQSKR	HQGVMVGMGQK[170]DSYVGDEAQSK[170]R[170]	52, 63	0	0	0	0	0	0	0	4	0	0	0	0	0	0	0	0	0	0	0
K	A0A498LN83	Alpha cardiac	representative	HQGVMVGMGQKDSYVGDEAQSKR	HQGVMVGM[147]GQKDSYVGDEAQSK[170]R	63	0	0	1	0	0	0	0	0	0	0	0	0	0	0	0	0	0	0	0
K	A0A498LN83	Alpha cardiac	representative	HQGVMVGMGQKDSYVGDEAQSKR	HQGVMVGM[147]GQK[170]DSYVGDEAQSKR	52	20	0	12	8	9	0	8	16	0	1	1	0	0	2	0	3	2	1	24
K	A0A498LN83	Alpha cardiac	representative	HQGVMVGMGQKDSYVGDEAQSKR	HQGVM[147]VGMGQK[170]DSYVGDEAQSKR	52	0	0	13	5	11	0	5	21	1	2	8	0	0	4	0	11	5	0	25
K	A0A498LN83	Alpha cardiac	representative	HQGVMVGMGQKDSYVGDEAQSKR	HQGVM[147]VGMGQK[170]DSYVGDEAQSK[170]R	52, 63	0	0	0	0	0	0	0	0	0	0	0	0	0	0	0	0	0	0	6
K	A0A498LN83	Alpha cardiac	representative	HQGVMVGMGQKDSYVGDEAQSKR	HQGVM[147]VGM[147]GQKDSYVGDEAQSK[170]R	63	0	0	2	0	0	0	0	0	0	0	0	0	0	0	0	0	0	0	0
K	A0A498LN83	Alpha cardiac	representative	HQGVMVGMGQKDSYVGDEAQSKR	HQGVM[147]VGM[147]GQK[170]DSYVGDEAQSKR	52	2	0	10	1	1	0	4	2	0	0	0	0	0	9	0	3	4	0	7
K	A0A498LN83	Alpha cardiac	representative	HQGVMVGMGQKDSYVGDEAQSKR	HQGVM[147]VGM[147]GQK[170]DSYVGDEAQSK[170]R	52, 63	0	0	4	0	0	0	0	0	0	0	0	0	0	0	0	0	0	0	0
K	A0A498LN83	Alpha cardiac	representative	HQGVMVGMGQKDSYVGDEAQSKR	n[15]HQGVMVGMGQK[170]DSYVGDEAQSKR	52	12	0	8	17	12	0	9	15	0	11	4	0	0	0	0	2	3	2	4
K	A0A498LN83	Alpha cardiac	representative	HQGVMVGMGQKDSYVGDEAQSKR	n[15]HQGVMVGM[147]GQK[170]DSYVGDEAQSKR	52	2	0	1	0	0	0	0	3	0	0	0	0	0	0	0	1	0	0	0
K	A0A498LN83	Alpha cardiac	representative	HQGVMVGMGQKDSYVGDEAQSKR	n[15]HQGVM[147]VGMGQK[170]DSYVGDEAQSKR	52	2	0	2	1	1	0	2	4	0	5	0	0	0	0	0	0	0	1	1
K	A0A498LN83	Alpha cardiac	representative	HQGVMVGMGQKDSYVGDEAQSKR	n[43]HQGVMVGMGQK[142]DSYVGDEAQSK[170]R	42, 63	2	0	0	0	0	0	0	0	0	0	0	0	0	0	0	0	0	0	0
K	A0A498LN83	Alpha cardiac	representative	HQGVMVGMGQKDSYVGDEAQSKR	n[43]HQGVMVGM[147]GQK[170]DSYVGDEAQSKR	42, 52	2	0	4	0	0	0	0	2	0	0	0	0	0	0	0	0	0	0	6
K	A0A498LN83	Alpha cardiac	representative	HQGVMVGMGQKDSYVGDEAQSKR	n[43]HQGVM[147]VGMGQK[170]DSYVGDEAQSKR	42, 52	4	0	20	4	0	0	8	10	0	2	6	0	0	10	0	10	2	0	56
K	A0A498LN83	Alpha cardiac	representative	HQGVMVGMGQKDSYVGDEAQSKR	n[43]HQGVM[147]VGM[147]GQK[170]DSYVGDEAQSKR	42, 52	0	0	26	12	0	0	4	12	0	0	0	0	0	22	0	6	2	0	38
K	A0A498LN83	Alpha cardiac	representative	HQGVMVGMGQKDSYVGDEAQSKR	n[43]HQGVM[147]VGM[147]GQK[170]DS[167]YVGDEAQSKR	42, 52	0	0	0	2	0	0	0	0	0	0	0	0	0	0	0	0	0	0	0
K	A0A498LN83	Alpha cardiac	representative	IKIIAPPERK	IK[170]IIAPPERK	330	0	0	0	1	0	0	0	0	0	0	0	0	0	0	0	0	0	0	0
K	A0A498LN83	Alpha cardiac	representative	LCYVALDFENEMATAASSSSLEK	LC[160]YVALDFENEM[147]ATAASSSSLEK[170]	240	1	0	0	2	0	0	0	0	0	0	0	0	0	0	0	0	0	0	0
K	A0A498LN83	Alpha cardiac	representative	LCYVALDFENEMATAASSSSLEK	n[43]LC[160]YVALDFENEMATAASSSSLEK[170]	218, 240	0	0	0	0	0	0	0	2	0	0	0	0	0	0	0	0	0	0	0
K	A0A498LN83	Alpha cardiac	representative	LCYVALDFENEMATAASSSSLEK	n[43]LC[160]YVALDFENEM[147]ATAASSSSLEK[170]	218, 240	0	0	0	2	4	0	0	0	0	0	0	0	0	0	0	0	0	0	0
K	A0A498LN83	Alpha cardiac	representative	LCYVALDFENEMATAASSSSLEKSYELPDGQVITIGNER	LC[160]YVALDFENEMATAASSSSLEK[170]SYELPDGQVITIGNER	240	0	0	0	0	0	0	0	5	0	0	0	0	0	0	0	0	0	0	0
K	A0A498LN83	Alpha cardiac	representative	LCYVALDFENEMATAASSSSLEKSYELPDGQVITIGNER	LC[160]YVALDFEN[115]EMATAASSSSLEK[170]SYELPDGQVITIGN[115]ER	240	0	0	0	0	0	0	0	1	0	0	0	0	0	0	0	0	0	0	0
K	A0A498LN83	Alpha cardiac	representative	LDLAGRDLTDYLMKILTER	LDLAGRDLTDYLMK[170]ILTER	193	0	0	2	0	0	0	0	1	0	0	0	0	0	0	0	0	0	0	0
K	A0A498LN83	Alpha cardiac	representative	LDLAGRDLTDYLMKILTER	LDLAGRDLTDYLM[147]K[170]ILTER	193	0	0	0	0	0	0	0	1	0	0	0	0	0	0	0	0	0	0	0
K	A0A498LN83	Alpha cardiac	representative	MQKEITALAPSTMK	MQKEITALAPSTM[147]K[170]	328	0	0	0	1	1	0	0	0	0	0	0	0	0	0	0	0	0	0	0
K	A0A498LN83	Alpha cardiac	representative	MQKEITALAPSTMK	MQK[170]EITALAPSTMK	317	9	0	2	6	3	0	0	8	0	3	0	0	0	0	0	0	10	0	9
K	A0A498LN83	Alpha cardiac	representative	MQKEITALAPSTMK	MQK[170]EITALAPSTM[147]K	317	0	0	0	0	0	0	0	0	0	0	0	0	0	0	0	0	2	0	7
K	A0A498LN83	Alpha cardiac	representative	MQKEITALAPSTMK	M[147]QK[170]EITALAPSTMK	317	0	0	0	0	2	0	0	0	0	0	0	0	0	0	0	0	3	0	7
K	A0A498LN83	Alpha cardiac	representative	MQKEITALAPSTMK	M[147]QK[170]EITALAPSTM[147]K	317	0	0	0	0	0	0	0	1	0	0	0	0	0	0	0	0	0	0	2
K	A0A498LN83	Alpha cardiac	representative	MQKEITALAPSTMK	n[15]MQK[170]EITALAPSTMK	317	1	0	0	0	2	0	0	0	0	1	0	0	0	0	0	0	0	0	0
K	A0A498LN83	Alpha cardiac	representative	MQKEITALAPSTMK	n[15]MQK[170]EITALAPSTM[147]K	317	1	0	0	2	1	0	0	0	0	0	0	0	0	0	0	0	0	0	0
K	A0A498LN83	Alpha cardiac	representative	MQKEITALAPSTMK	n[43]MQK[170]EITALAPSTMK	315, 317	4	0	0	0	0	0	0	0	0	0	0	0	0	0	0	0	0	0	6
K	A0A498LN83	Alpha cardiac	representative	MQKEITALAPSTMK	n[43]M[147]QK[170]EITALAPSTMK	315, 317	8	0	4	0	4	0	0	0	0	0	0	0	0	0	0	0	0	0	4
K	A0A498LN83	Alpha cardiac	representative	VAPEEHPTLLTEAPLNPKANR	VAPEEHPTLLTEAPLNPK[170]ANR	115	8	0	0	6	3	0	0	3	0	0	0	0	0	0	0	0	0	0	0
K	A0A498LN83	Alpha cardiac	representative	VAPEEHPTLLTEAPLNPKANR	VAPEEHPTLLTEAPLNPK[170]AN[115]R	115	6	0	4	5	3	0	0	8	0	1	0	0	0	3	0	2	9	0	18
K	A0A498LN83	Alpha cardiac	representative	VAPEEHPTLLTEAPLNPKANR	VAPEEHPTLLTEAPLNPK[170]AN[115]R[170]	115	10	0	1	5	2	0	0	12	0	0	0	0	0	0	0	0	1	0	0
K	A0A498LN83	Alpha cardiac	representative	VAPEEHPTLLTEAPLNPKANR	VAPEEHPTLLTEAPLN[115]PK[170]ANR	115	0	0	0	0	0	0	0	0	0	0	0	0	0	0	0	0	1	0	1
K	A0A498LN83	Alpha cardiac	representative	VAPEEHPTLLTEAPLNPKANREK	VAPEEHPTLLTEAPLNPK[170]AN[115]REK	115	0	0	0	0	0	0	0	2	0	0	0	0	0	0	0	0	0	0	0
K	A0A498LN83	Alpha cardiac	representative	VAPEEHPTLLTEAPLNPKANREK	VAPEEHPTLLTEAPLNPK[170]AN[115]REK[142]	115	1	0	0	0	0	0	0	0	0	0	0	0	0	0	0	0	0	0	0
K	A0A498LN83	Alpha cardiac	representative	VAPEEHPTLLTEAPLNPKANREK	VAPEEHPTLLTEAPLNPK[170]AN[115]R[170]EK	115	1	0	0	0	0	0	0	0	0	0	0	0	0	0	0	0	0	0	0
K	A0A498LN83	Alpha cardiac	representative	YPIEHGIITNWDDMEKIWHHTFYNELR	YPIEHGIITNWDDMEK[170]IWHHTFYNELR	86	0	0	2	0	0	0	3	0	0	0	0	0	0	0	0	0	0	0	0
K	A0A498LN83	Alpha cardiac	representative	YPIEHGIITNWDDMEKIWHHTFYNELR	YPIEHGIITNWDDMEK[170]IW[202]HHTFYNELR	86	0	0	1	0	0	0	3	0	0	0	1	0	0	0	0	1	0	1	0
K	A0A498LN83	Alpha cardiac	representative	YPIEHGIITNWDDMEKIWHHTFYNELR	YPIEHGIITNWDDM[147]EK[170]IWHHTFYNELR	86	0	0	0	0	0	0	1	0	0	0	0	0	0	0	0	0	0	0	0
K	A0A498LN83	Alpha cardiac	representative	YPIEHGIITNWDDMEKIWHHTFYNELR	YPIEHGIITNW[202]DDMEK[170]IWHHTFYNELR	86	0	0	0	0	0	0	1	0	0	7	0	0	0	0	0	1	0	0	1
K	A0A498LN83	Alpha cardiac	representative	YPIEHGIITNWDDMEKIWHHTFYNELR	YPIEHGIITN[115]WDDMEK[170]IW[202]HHTFYNELR	86	0	0	0	0	0	0	1	0	0	0	0	0	0	0	0	0	0	1	0
K	A0A498LN83	Alpha cardiac	representative	YPIEHGIITNWDDMEKIWHHTFYNELR	n[15]YPIEHGIITNWDDMEK[170]IWHHTFYNELR	86	0	0	0	0	1	0	0	0	0	14	0	0	0	0	0	0	0	0	0
K	A0A498LN83	Alpha cardiac	representative	YPIEHGIITNWDDMEKIWHHTFYNELR	n[15]YPIEHGIITNWDDMEK[170]IWHHTFYN[115]ELR	86	0	0	0	0	0	0	0	0	0	1	0	0	0	0	0	0	0	0	0
K	A0A498LN83	Alpha cardiac	representative	YPIEHGIITNWDDMEKIWHHTFYNELR	n[15]YPIEHGIITNW[202]DDMEK[170]IWHHTFYNELR	86	0	0	0	0	0	0	0	0	0	1	0	0	0	0	0	0	0	0	0
K	A0A498LN83	Alpha cardiac	representative	YPIEHGIITNWDDMEKIWHHTFYNELR	n[15]YPIEHGIITN[115]WDDMEK[170]IWHHTFYNELR	86	0	0	0	0	0	0	0	0	0	3	0	0	0	0	0	0	0	0	0
K	A0A498LN83	Alpha cardiac	representative	YPIEHGIITNWDDMEKIWHHTFYNELR	n[43]YPIEHGIITNWDDMEK[170]IWHHTFYNELR	71, 86	0	0	0	0	0	0	0	0	0	2	0	0	0	0	0	0	0	0	0
K	A0A498LN85	Transmembrane protein 214	canonical	AAGSSSLRILIK	n[43]AAGS[167]S[167]SLRILIK[170]	2, 13	0	0	0	0	0	0	0	0	0	0	0	0	2	0	0	0	0	0	0
K	A0A498LNA1	Glutathione S-transferase Mu 3-like protein	marginally distinguished	MFDAACLDDYKNLR	MFDAAC[160]LDDYK[170]NLR	178	0	0	0	0	0	0	0	0	0	0	0	0	0	1	0	0	0	0	0
K	A0A498LNA1	Glutathione S-transferase Mu 3-like protein	marginally distinguished	SCYTEKLPGTLK	SC[160]YTEK[170]LPGTLK	129	0	0	0	0	0	0	2	0	0	1	0	0	0	2	1	0	2	1	1
K	A0A498LNC0	Calponin	canonical	AGNSIISQQMGSNK	AGNSIISQQMGSN[115]K[170]	173	0	0	0	0	0	0	0	15	0	0	0	0	0	0	0	0	0	0	0
K	A0A498LNC0	Calponin	canonical	AGNSIISQQMGSNK	AGN[115]SIISQQMGSN[115]K[170]	173	0	0	0	0	0	0	0	8	0	0	0	0	0	0	0	0	0	0	0
K	A0A498LNC0	Calponin	canonical	AGNSIISQQMGSNKYASQK	AGNSIISQQMGSNK[170]YASQK	173	0	0	0	0	0	0	0	2	0	0	0	0	0	0	0	0	0	0	0
K	A0A498LNC0	Calponin	canonical	AGNSIISQQMGSNKYASQK	AGNSIISQQMGSN[115]K[142]YASQK[170]	178	0	0	0	0	0	0	0	2	0	0	0	0	0	0	0	0	0	0	0
K	A0A498LNC0	Calponin	canonical	AGNSIISQQMGSNKYASQK	AGNSIISQQMGSN[115]K[170]YASQK	173	0	0	0	0	0	0	0	7	0	0	0	0	0	0	0	0	0	0	0
K	A0A498LNC0	Calponin	canonical	AGNSIISQQMGSNKYASQK	AGNSIISQQM[147]GSNK[170]YASQK	173	0	0	0	0	0	0	0	2	0	0	0	0	0	0	0	0	0	0	0
K	A0A498LNC0	Calponin	canonical	AGNSIISQQMGSNKYASQK	AGNSIISQQM[147]GSN[115]K[142]YASQK[170]	178	0	0	0	0	0	0	0	1	0	0	0	0	0	0	0	0	0	0	0
K	A0A498LNC0	Calponin	canonical	AGNSIISQQMGSNKYASQK	AGN[115]SIISQQMGSN[115]K[142]YASQK[170]	178	0	0	0	0	0	0	0	1	0	0	0	0	0	0	0	0	0	0	0
K	A0A498LNC0	Calponin	canonical	AGNSIISQQMGSNKYASQK	AGN[115]SIISQQM[147]GSNK[170]YASQK	173	0	0	0	0	0	0	0	2	0	0	0	0	0	0	0	0	0	0	0
K	A0A498LNC0	Calponin	canonical	AIGEYGLKPHDIFEANDLFEDMNHTQVQCTLVTLAGVAK	AIGEYGLKPHDIFEANDLFEDMN[115]HTQVQC[160]TLVTLAGVAK[170]	131	0	0	0	0	0	0	0	1	0	0	0	0	0	0	0	0	0	0	0
K	A0A498LNC0	Calponin	canonical	AIGEYGLKPHDIFEANDLFEDMNHTQVQCTLVTLAGVAK	AIGEYGLKPHDIFEANDLFEDM[147]NHTQVQC[160]TLVTLAGVAK[170]	131	0	0	0	0	0	0	0	1	0	0	0	0	0	0	0	0	0	0	0
K	A0A498LNC0	Calponin	canonical	AIGEYGLKPHDIFEANDLFEDMNHTQVQCTLVTLAGVAK	AIGEYGLKPHDIFEAN[115]DLFEDMNHTQVQC[160]TLVTLAGVAK[170]	131	0	0	0	0	0	0	0	1	0	0	0	0	0	0	0	0	0	0	0
K	A0A498LNC0	Calponin	canonical	AIGEYGLKPHDIFEANDLFEDMNHTQVQCTLVTLAGVAK	AIGEYGLK[170]PHDIFEANDLFEDMNHTQVQC[160]TLVTLAGVAK	100	0	0	0	0	0	0	0	3	0	0	0	0	0	0	0	0	0	0	0
K	A0A498LNC0	Calponin	canonical	AIGEYGLKPHDIFEANDLFEDMNHTQVQCTLVTLAGVAK	AIGEYGLK[170]PHDIFEANDLFEDMN[115]HTQVQC[160]TLVTLAGVAK	100	0	0	0	0	0	0	0	2	0	0	0	0	0	0	0	0	0	0	0
K	A0A498LNC0	Calponin	canonical	AIGEYGLKPHDIFEANDLFEDMNHTQVQCTLVTLAGVAK	AIGEYGLK[170]PHDIFEANDLFEDM[147]NHTQVQC[160]TLVTLAGVAK	100	0	0	0	0	0	0	0	27	0	2	0	0	0	0	0	0	0	0	0
K	A0A498LNC0	Calponin	canonical	AIGEYGLKPHDIFEANDLFEDMNHTQVQCTLVTLAGVAK	AIGEYGLK[170]PHDIFEANDLFEDM[147]N[115]HTQVQC[160]TLVTLAGVAK	100	0	0	0	0	0	0	0	3	0	0	0	0	0	0	0	0	0	0	0
K	A0A498LNC0	Calponin	canonical	AIGEYGLKPHDIFEANDLFEDMNHTQVQCTLVTLAGVAK	AIGEYGLK[170]PHDIFEAN[115]DLFEDMNHTQVQC[160]TLVTLAGVAK	100	0	0	0	0	0	0	0	1	0	0	0	0	0	0	0	0	0	0	0
K	A0A498LNC0	Calponin	canonical	AIGEYGLKPHDIFEANDLFEDMNHTQVQCTLVTLAGVAK	AIGEYGLK[170]PHDIFEAN[115]DLFEDM[147]NHTQVQC[160]TLVTLAGVAK	100	0	0	0	0	0	0	0	6	0	0	0	0	0	0	0	0	0	0	0
K	A0A498LNC0	Calponin	canonical	AIGEYGLKPHDIFEANDLFEDMNHTQVQCTLVTLAGVAK	AIGEYGLK[170]PHDIFEAN[115]DLFEDM[147]N[115]HTQVQC[160]TLVTLAGVAK	100	0	0	0	0	0	0	0	2	0	0	0	0	0	0	0	0	0	0	0
K	A0A498LNC0	Calponin	canonical	AIGEYGLKPHDIFEANDLFEDMNHTQVQCTLVTLAGVAK	n[15]AIGEYGLK[170]PHDIFEAN[115]DLFEDM[147]NHTQVQC[160]TLVTLAGVAK	100	0	0	0	0	0	0	0	2	0	0	0	0	0	0	0	0	0	0	0
K	A0A498LNC0	Calponin	canonical	AIGEYGLKPHDIFEANDLFEDMNHTQVQCTLVTLAGVAK	n[43]AIGEYGLK[170]PHDIFEAN[115]DLFEDMNHTQVQC[160]TLVTLAGVAK	93, 100	0	0	0	0	0	0	0	2	0	0	0	0	0	0	0	0	0	0	0
K	A0A498LNC0	Calponin	canonical	AIGEYGLKPHDIFEANDLFEDMNHTQVQCTLVTLAGVAKTK	AIGEYGLKPHDIFEANDLFEDMNHTQVQC[160]TLVTLAGVAK[170]TK	131	0	0	0	0	0	0	0	1	0	0	0	0	0	0	0	0	0	0	0
K	A0A498LNC0	Calponin	canonical	AIGEYGLKPHDIFEANDLFEDMNHTQVQCTLVTLAGVAKTK	AIGEYGLKPHDIFEAN[115]DLFEDMNHTQVQC[160]TLVTLAGVAK[170]TK	131	0	0	0	0	0	0	0	2	0	0	0	0	0	0	0	0	0	0	0
K	A0A498LNC0	Calponin	canonical	AIGEYGLKPHDIFEANDLFEDMNHTQVQCTLVTLAGVAKTK	AIGEYGLKPHDIFEAN[115]DLFEDMN[115]HTQVQC[160]TLVTLAGVAK[170]TK	131	0	0	0	0	0	0	0	1	0	0	0	0	0	0	0	0	0	0	0
K	A0A498LNC0	Calponin	canonical	AVPDNFMEGLKDGVILCELINK	AVPDNFMEGLK[170]DGVILC[160]ELINK	54	0	0	0	0	0	0	0	5	0	0	0	0	0	0	0	0	0	0	0
K	A0A498LNC0	Calponin	canonical	AVPDNFMEGLKDGVILCELINK	AVPDNFM[147]EGLK[170]DGVILC[160]ELINK	54	0	0	0	0	0	0	0	4	0	0	0	0	0	0	0	0	0	0	0
K	A0A498LNC0	Calponin	canonical	AVPDNFMEGLKDGVILCELINK	AVPDN[115]FMEGLK[170]DGVILC[160]ELINK	54	0	0	0	0	0	0	0	4	0	0	0	0	0	0	0	0	0	0	0
K	A0A498LNC0	Calponin	canonical	AVPDNFMEGLKDGVILCELINK	AVPDN[115]FM[147]EGLK[170]DGVILC[160]ELINK	54	0	0	0	0	0	0	0	1	0	0	0	0	0	0	0	0	0	0	0
K	A0A498LNC0	Calponin	canonical	AVPDNFMEGLKDGVILCELINK	n[15]AVPDN[115]FMEGLK[170]DGVILC[160]ELINK	54	0	0	0	0	0	0	0	1	0	0	0	0	0	0	0	0	0	0	0
K	A0A498LNC0	Calponin	canonical	AVPDNFMEGLKDGVILCELINK	n[43]AVPDN[115]FMEGLK[170]DGVILC[160]ELINK	44, 54	0	0	0	0	0	0	0	10	0	0	0	0	0	0	0	0	0	0	0
K	A0A498LNC0	Calponin	canonical	AVPDNFMEGLKDGVILCELINKLQPGSISK	AVPDNFMEGLK[170]DGVILC[160]ELIN[115]K[142]LQPGSISK	54	0	0	0	0	0	0	0	1	0	0	0	0	0	0	0	0	0	0	0
K	A0A498LNC0	Calponin	canonical	HLYDPNIGMEKPADR	HLYDPNIGMEK[170]PADR	198	0	0	0	0	0	0	0	1	0	0	0	0	0	0	0	0	0	0	0
K	A0A498LNC0	Calponin	canonical	HLYDPNIGMEKPADR	HLYDPNIGMEK[170]PADR[170]	198	0	0	0	0	0	0	0	2	0	0	0	0	0	0	0	0	0	0	0
K	A0A498LNC0	Calponin	canonical	HLYDPNIGMEKPADR	HLYDPNIGM[147]EK[170]PADR	198	0	0	0	0	0	0	0	24	0	0	0	0	0	0	0	0	0	0	0
K	A0A498LNC0	Calponin	canonical	HLYDPNIGMEKPADR	HLYDPN[115]IGMEK[170]PADR	198	0	0	0	0	0	0	0	21	0	0	0	0	0	0	0	0	0	0	0
K	A0A498LNC0	Calponin	canonical	HLYDPNIGMEKPADR	HLYDPN[115]IGMEK[170]PADR[170]	198	0	0	0	0	0	0	0	5	0	0	0	0	0	0	0	0	0	0	0
K	A0A498LNC0	Calponin	canonical	HLYDPNIGMEKPADR	HLYDPN[115]IGM[147]EK[170]PADR	198	0	0	0	0	0	0	0	4	0	0	0	0	0	0	0	0	0	0	0
K	A0A498LNC0	Calponin	canonical	HLYDPNIGMEKPADR	HLYDPN[115]IGM[147]EK[170]PADR[170]	198	0	0	0	0	0	0	0	2	0	0	0	0	0	0	0	0	0	0	0
K	A0A498LNC0	Calponin	canonical	LAQKYDPQMEEDLR	LAQK[170]YDPQMEEDLR	24	0	0	0	0	0	0	0	2	0	0	0	0	0	0	0	0	0	0	0
K	A0A498LNC0	Calponin	canonical	MKAGNSIISQQMGSNK	n[15]MK[170]AGN[115]SIISQQMGSNK	159	0	0	0	0	0	0	0	1	0	0	0	0	0	0	0	0	0	0	0
K	A0A498LNC0	Calponin	canonical	NVNLDPVDTTTVSLQMGTNK	NVNLDPVDTTTVSLQMGTN[115]K[170]	252	0	0	0	0	0	0	0	2	0	0	0	0	0	0	0	0	0	0	0
K	A0A498LNC0	Calponin	canonical	NVNLDPVDTTTVSLQMGTNKVPSQSGLTPMGGAR	NVNLDPVDTTTVSLQM[147]GTNK[170]VPSQSGLTPMGGAR	252	0	0	0	0	0	0	0	1	0	0	0	0	0	0	0	0	0	0	0
K	A0A498LNC0	Calponin	canonical	RHLYDPNIGMEKPADR	RHLYDPNIGMEK[170]PADR	198	0	0	0	0	0	0	0	1	0	0	0	0	0	0	0	0	0	0	0
K	A0A498LNC0	Calponin	canonical	RHLYDPNIGMEKPADR	RHLYDPNIGM[147]EK[170]PADR	198	0	0	0	0	0	0	0	2	0	0	0	0	0	0	0	0	0	0	0
K	A0A498LNC0	Calponin	canonical	STINLQMGTNK	STINLQMGTN[115]K[170]	213	0	0	0	0	0	0	0	1	0	0	0	0	0	0	0	0	0	0	0
K	A0A498LNC0	Calponin	canonical	STQFSKGPTFGLSADVR	n[43]STQFSK[170]GPTFGLSADVR	2, 7	0	0	0	0	0	0	0	6	0	0	0	0	0	0	0	0	0	0	0
K	A0A498LNC0	Calponin	canonical	VNHSTLNWHKLENITHFVR	VNHSTLNWHK[170]LENITHFVR	83	0	0	0	0	0	0	0	1	0	0	0	0	0	0	0	0	0	0	0
K	A0A498LNC0	Calponin	canonical	VNHSTLNWHKLENITHFVR	VNHSTLNW[202]HK[170]LENITHFVR	83	0	0	0	0	0	0	0	3	0	0	0	0	0	0	0	0	0	0	0
K	A0A498LNC0	Calponin	canonical	VNHSTLNWHKLENITHFVR	n[15]VNHSTLNWHK[170]LENITHFVR	83	0	0	0	0	0	0	0	4	0	0	0	0	0	0	0	0	0	0	0
K	A0A498LNC0	Calponin	canonical	VNHSTLNWHKLENITHFVR	n[15]VNHSTLN[115]WHK[170]LENITHFVR	83	0	0	0	0	0	0	0	3	0	0	0	0	0	0	0	0	0	0	0
K	A0A498LNC0	Calponin	canonical	VNHSTLNWHKLENITHFVR	n[15]VN[115]HSTLN[115]WHK[170]LENITHFVR	83	0	0	0	0	0	0	0	1	0	0	0	0	0	0	0	0	0	0	0
K	A0A498LNC0	Calponin	canonical	VNHSTLNWHKLENITHFVR	n[43]VNHSTLNWHK[170]LEN[115]ITHFVR[170]	74, 83	0	0	0	0	0	0	0	4	0	0	0	0	0	0	0	0	0	0	0
K	A0A498LNC0	Calponin	canonical	YASQKGMTSYGTR	YASQK[170]GMTSYGTR	178	0	0	0	0	0	0	0	1	0	0	0	0	0	0	0	0	0	0	0
K	A0A498LNC0	Calponin	canonical	YCAKPHEQDGTDFIN	YC[160]AK[170]PHEQDGTDFIN	276	0	0	0	0	0	0	0	1	0	0	0	0	0	0	0	0	0	0	0
K	A0A498LND3	Arrestin-C-like protein	canonical	DYVDHVDVVEPVEGVLKIDPSELGDR	DYVDHVDVVEPVEGVLK[170]IDPSELGDR	117	0	0	1	0	0	0	0	0	0	0	0	0	0	0	0	0	0	0	0
K	A0A498LND3	Arrestin-C-like protein	canonical	DYVDHVDVVEPVEGVLKIDPSELGDRK	DYVDHVDVVEPVEGVLK[170]IDPSELGDRK	117	0	0	1	0	0	0	0	0	0	0	0	0	0	0	0	0	0	0	0
K	A0A498LND3	Arrestin-C-like protein	canonical	SFMMSDKPVLLEASLDKEIYYHGDPIPVTVK	SFM[147]MSDK[170]PVLLEASLDKEIYYHGDPIPVTVK	272	0	0	1	0	0	0	0	0	0	0	0	0	0	0	0	0	0	0	0
K	A0A498LND3	Arrestin-C-like protein	canonical	SFMMSDKPVLLEASLDKEIYYHGDPIPVTVK	SFM[147]M[147]SDK[170]PVLLEASLDKEIYYHGDPIPVTVK	272	0	0	2	0	0	0	0	0	0	0	0	0	0	0	0	0	0	0	0
K	A0A498LND3	Arrestin-C-like protein	canonical	SFMMSDKPVLLEASLDKEIYYHGDPIPVTVK	n[15]SFMMSDK[170]PVLLEASLDKEIYYHGDPIPVTVK	272	0	0	2	0	0	0	0	0	0	0	0	0	0	0	0	0	0	0	0
K	A0A498LND3	Arrestin-C-like protein	canonical	SFMMSDKPVLLEASLDKEIYYHGDPIPVTVK	n[15]SFM[147]MSDK[170]PVLLEASLDKEIYYHGDPIPVTVK	272	0	0	1	0	0	0	0	0	0	0	0	0	0	0	0	0	0	0	0
K	A0A498LND3	Arrestin-C-like protein	canonical	SFMMSDKPVLLEASLDKEIYYHGDPIPVTVK	n[43]SFM[147]M[147]SDK[170]PVLLEASLDKEIYYHGDPIPVTVK	266, 272	0	0	2	0	0	0	0	0	0	0	0	0	0	0	0	0	0	0	0
[truncated: 53,834 more rows]

## Sheet: Acetylated_peptide_plot
																								Organ	#Acetylpeptides	#Acetylproteins
Acetyl mass shift 42.011				AB	Brain	Embryo	Eye	FG	Fin	GB	Gill	Gut	Heart	Kidney	Liver	MG	Muscle	Plasma	Scales	Skin	SC	Spleen		Kidney	2500	758
			K-Acetyl	148	243	28	596	111	25	49	144	141	390	1304	779	439	177	43	10	172	236	105		Liver	1841	729
Acetylation K mass	170.201		N-term Acetyl	462	968	278	949	443	183	299	592	604	795	1691	1380	885	479	49	39	503	827	252		Eye	1364	508
Acetylation n mass	42.011																							MG	1187	543
																								Brain	1136	653
																								Heart	1039	490
Total n Term Ace peptides	5036																							Spinal	994	525
Total n Term Ace proteins	5872																							Gut	694	405
Total n Term Ace can proteins	1693																							Gill	679	431
																								Skin	622	327
																								Muscle	573	254
Total K Ace peptides	3137																							Air Bladder	564	288
Total K Ace proteins	3225																							FG	529	321
Total K Ace can proteins	886																							Spleen	337	242
																								GB	334	252
																								Embryo	302	213
Total Acetyl peptides	6870																							Fin	203	151
Total Acetyl proteins	6253																							Plasma	87	68
Total Acetyl canonical proteins	1813																							Scales	44	26

## Sheet: All_Methyl
Methyl type	Protein Accession	Protein name	presence_level	Peptide sequence	Methyl peptide	Methyl site	Muscle	Gallbladder	Eye	Gut	Skin	Plasma	Spinal_cord	Airbladder	Spleen	Gill	Brain	Embryo	Scales	Male_gonad	Fin	Liver	Heart	Female_gonads	Kidney
n-Term	A0A498L1S9	Band 3 isoform X1	indistinguishable representative	VRPGELEQFESTIGFK	n[15]VRPGELEQFESTIGFK	198	0	0	0	1	0	0	0	0	0	0	0	0	0	0	0	0	0	0	1
n-Term	A0A498L2I3	Histone	indistinguishable representative	FQSAAIGALQEASEAYLVGLFEDTNLCAIHAK	n[15]FQSAAIGALQEASEAYLVGLFEDTNLC[160]AIHAK	166	0	0	0	0	0	0	0	0	0	0	0	0	0	0	0	0	1	0	0
n-Term	A0A498L2I3	Histone	indistinguishable representative	FQSAAIGALQEASEAYLVGLFEDTNLCAIHAK	n[15]FQSAAIGALQEASEAYLVGLFEDTN[115]LC[160]AIHAK	166	0	0	0	0	0	0	0	0	0	0	0	0	0	0	0	0	1	0	1
n-Term	A0A498L3C1	Filamin-B isoform X1	indistinguishable representative	KVPKPKACR	n[15]K[142]VPK[142]PKAC[160]R	259, 262	0	0	0	0	0	0	0	0	0	0	0	0	0	0	0	0	0	0	3
n-Term	A0A498L3K0	Gamma-crystallin M2-like protein	representative	RGDYADYMSMFGMNNCIR	n[15]RGDYADYMSMFGMNNC[160]IR[170]	61, 78	0	0	4	0	0	0	0	0	0	0	0	0	0	0	0	0	0	0	0
n-Term	A0A498L3K0	Gamma-crystallin M2-like protein	representative	RGDYADYMSMFGMNNCIR	n[15]RGDYADYMSMFGMN[115]NC[160]IR	61	0	0	1	0	0	0	0	0	0	0	0	0	0	0	0	0	0	0	0
n-Term	A0A498L3K0	Gamma-crystallin M2-like protein	representative	RGDYADYMSMFGMNNCIR	n[15]RGDYADYMSMFGM[147]NNC[160]IR[170]	61, 78	0	0	2	0	0	0	0	0	0	0	0	0	0	0	0	0	0	0	0
n-Term	A0A498L3L2	Gamma-crystallin M3	canonical	GKIIFYEDRNFQGR	n[15]GKIIFYEDRNFQGR	2	0	0	2	0	0	0	0	0	0	0	0	0	0	0	0	0	0	0	0
n-Term	A0A498L3L2	Gamma-crystallin M3	canonical	GKIIFYEDRNFQGR	n[15]GKIIFYEDRN[115]FQGR	2	0	0	2	0	0	0	0	0	0	0	0	0	0	0	0	0	0	0	0
n-Term	A0A498L3N5	Histone H1-like protein	subsumed	KALAAGGYDVEKNNSR	n[15]K[170]ALAAGGYDVEKNNSR	57	0	0	0	0	0	0	0	0	0	0	0	0	0	0	0	0	1	0	0
n-Term	A0A498L478	Histone H2B	subsumed	KESYAIYVYK	n[15]KESYAIYVYK	33	0	0	0	0	0	0	0	0	0	0	0	0	0	0	0	0	0	0	1
n-Term	A0A498L478	Histone H2B	subsumed	KESYAIYVYK	n[15]K[170]ESYAIYVYK	33	0	1	0	0	0	0	0	0	0	0	0	0	0	0	1	0	0	0	0
n-Term	A0A498L478	Histone H2B	subsumed	SRKESYAIYVYK	n[15]SRKESYAIYVYK	31	0	0	0	0	0	0	1	0	0	0	0	0	0	0	0	0	0	0	1
n-Term	A0A498L488	Histone H2A	subsumed	HLQLAVRNDEELNKLLGGVTIAQGGVLPNIQAVLLPK	n[15]HLQLAVR[170]N[115]DEELNKLLGGVTIAQGGVLPNIQAVLLPK	83, 89	0	0	2	0	0	0	0	0	0	0	0	0	0	0	0	0	0	0	0
n-Term	A0A498L488	Histone H2A	subsumed	NDEELNKLLGGVTIAQGGVLPNIQAVLLPK	n[15]NDEELNKLLGGVTIAQGGVLPNIQAVLLPK	90	0	0	1	0	0	0	0	0	0	0	0	0	0	0	0	1	0	0	1
n-Term	A0A498L4A0	Myofibril-bound serine ase	canonical	TGAGPASTLQCLDLPVLSKK	n[15]TGAGPASTLQC[160]LDLPVLSKK	89	0	0	0	0	0	0	0	0	0	1	0	0	0	0	0	0	0	0	0
n-Term	A0A498L4F1	Glyceraldehyde-3-phosphate testis-specific	canonical	AVGKVIPELNGKLTGMAFR	n[15]AVGK[170]VIPELN[115]GKLTGMAFR	230	1	0	0	0	0	0	0	0	0	0	0	0	0	0	0	1	0	0	0
n-Term	A0A498L4F1	Glyceraldehyde-3-phosphate testis-specific	canonical	IVSNASCTTNCLAPLAK	n[15]IVSNASC[160]TTNC[160]LAPLAK	160	7	0	0	0	1	0	0	0	0	0	0	0	0	0	0	2	0	0	0
n-Term	A0A498L4F1	Glyceraldehyde-3-phosphate testis-specific	canonical	VVVSAPSPDAPMFVMGVNQDKYDPSSMTIVSNASCTTNCLAPLAK	n[15]VVVSAPSPDAPMFVMGVNQDKYDPSSMTIVSN[115]ASC[160]TTNC[160]LAPLAK[170]	132	0	0	0	0	0	0	0	0	0	0	1	0	0	0	0	0	0	0	0
n-Term	A0A498L4F1	Glyceraldehyde-3-phosphate testis-specific	canonical	VVVSAPSPDAPMFVMGVNQDKYDPSSMTIVSNASCTTNCLAPLAK	n[15]VVVSAPSPDAPMFVMGVNQDK[170]YDPSSMTIVSNASC[160]TTNC[160]LAPLAK	132	0	0	0	0	0	0	0	0	0	0	1	0	0	0	0	0	0	0	0
n-Term	A0A498L4F1	Glyceraldehyde-3-phosphate testis-specific	canonical	VVVSAPSPDAPMFVMGVNQDKYDPSSMTIVSNASCTTNCLAPLAK	n[15]VVVSAPSPDAPMFVMGVN[115]QDK[170]YDPSSMTIVSNASC[160]TTNC[160]LAPLAK	132	0	0	0	0	0	0	0	1	0	0	0	0	0	0	0	0	0	0	0
n-Term	A0A498L4J5	Histone H3	representative	KSAPATGGVK	n[15]KSAPATGGVK[170]	141	0	0	0	0	0	0	0	0	0	0	0	0	0	0	0	0	0	0	1
n-Term	A0A498L4J5	Histone H3	representative	KSAPATGGVK	n[15]K[170]SAPATGGVK	141	0	0	0	0	0	0	0	0	0	0	0	0	0	0	0	1	2	0	3
n-Term	A0A498L4J5	Histone H3	representative	KSAPATGGVKKPHR	n[15]K[170]SAPATGGVK[142]KPHR	141, 150	0	0	0	0	0	0	0	0	0	0	0	0	0	0	0	0	0	0	4
n-Term	A0A498L4K7	FEV protein	subsumed	CANHSDSKITLYECEDFMGR	n[15]C[160]ANHSDSKITLYEC[160]EDFMGR	100	0	0	3	0	0	0	0	0	0	0	0	0	0	0	0	0	0	0	0
n-Term	A0A498L4Z1	Coatomer subunit beta	canonical	ETCLGQTRPATDYPLVTPNEER	n[15]ETC[160]LGQTRPATDYPLVTPNEER	899	0	0	0	0	0	0	0	0	0	0	0	0	0	1	0	0	0	0	0
n-Term	A0A498L4Z7	Fructose-bisphosphate aldolase (EC 4.1.2.13)	subsumed	ALSDHHVYLEGTLLKPNMVTAGHSCSQK	n[15]ALSDHHVYLEGTLLK[170]PNMVTAGHSC[160]SQK	216	0	0	0	0	1	0	0	0	0	0	0	0	0	0	0	0	0	0	0
n-Term	A0A498L4Z7	Fructose-bisphosphate aldolase (EC 4.1.2.13)	subsumed	CVLKITPTTPSR	n[15]C[160]VLKITPTTPSR	150	0	0	0	0	1	0	0	0	0	0	0	0	0	0	0	0	0	0	0
n-Term	A0A498L4Z7	Fructose-bisphosphate aldolase (EC 4.1.2.13)	subsumed	IVAPGKGILAADESTGSVAK	n[15]IVAPGK[170]GILAADESTGSVAK	23	0	0	0	1	1	0	0	0	0	0	0	0	0	0	0	0	0	0	0
n-Term	A0A498L4Z7	Fructose-bisphosphate aldolase (EC 4.1.2.13)	subsumed	IVAPGKGILAADESTGSVAKR	n[15]IVAPGK[170]GILAADESTGSVAKR	23	11	0	0	1	0	0	0	0	0	0	0	0	0	1	0	0	0	0	0
n-Term	A0A498L4Z7	Fructose-bisphosphate aldolase (EC 4.1.2.13)	subsumed	PHAYPFLTPEQK	n[15]PHAYPFLTPEQK	2	0	0	0	0	4	0	1	0	0	1	0	0	0	0	0	0	3	0	0
n-Term	A0A498L4Z7	Fructose-bisphosphate aldolase (EC 4.1.2.13)	subsumed	VDKGVVPLAGTNGETTTQGLDGLYER	n[15]VDKGVVPLAGTNGETTTQGLDGLYER	109	1	0	0	0	0	0	0	0	0	0	0	0	0	0	0	0	0	0	0
n-Term	A0A498L4Z7	Fructose-bisphosphate aldolase (EC 4.1.2.13)	subsumed	VDKGVVPLAGTNGETTTQGLDGLYER	n[15]VDK[170]GVVPLAGTN[115]GETTTQGLDGLYER	109	2	0	0	0	0	0	0	0	0	0	0	0	0	0	0	0	0	0	0
n-Term	A0A498L4Z7	Fructose-bisphosphate aldolase (EC 4.1.2.13)	subsumed	VKPCIGGVILFHETLYQK	n[15]VKPC[160]IGGVILFHETLYQK	70	20	0	0	0	2	0	0	0	2	3	0	0	0	0	0	0	0	0	0
n-Term	A0A498L557	Vitamin D-binding-like protein	representative	CCKDDASPDCYDKGATEISEK	n[15]C[160]C[160]KDDASPDC[160]YDK[142]GATEISEK	72, 84	0	0	0	0	0	2	0	0	0	0	0	0	0	0	0	0	0	0	0
n-Term	A0A498L557	Vitamin D-binding-like protein	representative	SCGKDSPFPK	n[15]SC[160]GKDSPFPK	93	0	0	0	0	0	0	0	0	0	0	0	0	0	0	0	0	0	0	1
n-Term	A0A498L5H4	Transketolase-like protein	canonical	TSRPDTAVIYDAGEK	n[15]TSRPDTAVIYDAGEK	475	0	0	0	0	0	0	0	0	0	0	0	0	0	0	0	0	1	0	0
n-Term	A0A498L5H4	Transketolase-like protein	canonical	VIDPFTIKPLDASTIVASAR	n[15]VIDPFTIK[170]PLDASTIVASAR	534	0	0	0	0	0	0	1	0	0	0	0	0	0	0	0	0	0	0	0
n-Term	A0A498L5S0	Troponin fast skeletal muscle-like isoform X1	canonical	QLVANKEAHMNENCPALSLPGSSQELQELCKK	n[15]QLVANK[170]EAHMNENC[160]PALSLPGSSQELQELC[160]KK	27	1	0	0	0	0	0	0	0	0	0	0	0	0	0	0	0	0	0	0
n-Term	A0A498L5S0	Troponin fast skeletal muscle-like isoform X1	canonical	QLVANKEAHMNENCPALSLPGSSQELQELCKK	n[15]QLVAN[115]K[170]EAHMNENC[160]PALSLPGSSQELQELC[160]KK	27	1	0	0	0	0	0	0	0	0	0	0	0	0	0	0	0	0	0	0
n-Term	A0A498L684	Myofibril-bound serine ase	canonical	GCARPGYPGVYVELCR	n[15]GC[160]ARPGYPGVYVELC[160]R	217	0	0	0	0	0	0	1	0	0	0	1	0	0	0	0	0	0	0	0
n-Term	A0A498L684	Myofibril-bound serine ase	canonical	GGKDSCQGDGGGPVVCNGK	n[15]GGKDSC[160]QGDGGGPVVC[160]N[115]GK	189	0	0	0	0	0	0	3	0	0	0	0	0	0	0	0	0	0	0	0
n-Term	A0A498L684	Myofibril-bound serine ase	canonical	GGKDSCQGDGGGPVVCNGK	n[15]GGK[170]DSC[160]QGDGGGPVVC[160]NGK	189	0	0	0	0	0	0	1	0	0	0	0	0	0	0	0	0	0	0	0
n-Term	A0A498L684	Myofibril-bound serine ase	canonical	GGKDSCQGDGGGPVVCNGKLQGVVSFGR	n[15]GGKDSC[160]QGDGGGPVVC[160]N[115]GKLQGVVSFGR	189	0	0	0	0	0	0	1	0	0	0	0	0	0	0	0	0	0	0	0
n-Term	A0A498L6A2	Annexin	subsumed	QEHDHDLEKDVTGDTGGHFQR	n[15]QEHDHDLEK[170]DVTGDTGGHFQR	132	0	0	0	0	0	0	0	1	0	0	0	0	0	0	0	0	0	0	0
n-Term	A0A498L6A5	Alpha-2-macroglobulin-like protein	canonical	QQNAYGGFSSTQDTVVALQALSLYATK	n[15]QQNAYGGFSSTQDTVVALQALSLYATK	1349	0	0	0	0	0	1	0	0	0	0	0	0	0	0	0	0	0	0	0
n-Term	A0A498L6B4	Eukaryotic translation initiation factor 4E transporter isoform X1	canonical	RSFGGGCQVAPTALPR	n[15]RSFGGGC[160]QVAPTALPR	114	0	0	0	0	0	0	0	0	0	0	0	0	0	1	0	0	0	0	0
n-Term	A0A498L6C5	Alpha-2-macroglobulin-like isoform X2	canonical	QQNAYGGFSSTQDTVVALQALSLYATK	n[15]QQNAYGGFSSTQDTVVALQALSLYATK	1752	0	0	0	0	0	1	0	0	0	0	0	0	0	0	0	0	0	0	0
n-Term	A0A498L6E5	TBC1 domain family member 22A isoform X1	canonical	HREIQSCNVLDGAWVFYEHPNYR	n[15]HREIQSC[160]NVLDGAWVFYEHPNYR	99	0	0	11	0	0	0	0	0	0	0	0	0	0	0	0	0	0	0	0
n-Term	A0A498L6E5	TBC1 domain family member 22A isoform X1	canonical	HREIQSCNVLDGAWVFYEHPNYR	n[15]HREIQSC[160]N[115]VLDGAWVFYEHPNYR	99	0	0	1	0	0	0	0	0	0	0	0	0	0	0	0	0	0	0	0
n-Term	A0A498L6M3	Type I cytoskeletal 18-like protein	canonical	MSFYAPQASHISFTR	n[15]MS[167]FYAPQASHISFTR	1	0	0	0	0	0	0	0	0	0	0	0	0	0	0	0	0	0	0	1
n-Term	A0A498L7A1	Retinol dehydrogenase 13-like protein	canonical	RSGNDNVVVK	n[15]RSGNDNVVVK	82	0	1	0	0	0	0	0	0	0	0	0	0	0	0	0	0	0	0	0
n-Term	A0A498L7I0	Type I cytoskeletal 18	canonical	VMTVTQTLVDGKVVSSSTETKER	n[15]VMTVTQTLVDGK[170]VVSSSTETKER	410	0	0	0	0	0	0	0	0	0	0	0	0	0	2	0	1	0	0	0
n-Term	A0A498L7R5	Malate dehydrogenase (EC 1.1.1.37)	canonical	FTFSLLDAMNGKEGVVECAFVR	n[15]FTFSLLDAMN[115]GK[170]EGVVEC[160]AFVR	250	0	0	0	0	0	0	0	0	0	1	0	0	0	0	0	0	0	0	0
n-Term	A0A498L7R7	Serine/threonine-protein kinase receptor (EC 2.7.11.30)	canonical	CFTGQRLEVFGDCENFQDR	n[15]C[160]FTGQRLEVFGDC[160]ENFQDR	15	0	0	1	0	0	0	0	0	0	0	0	0	0	0	0	0	0	0	0
n-Term	A0A498L7Z4	Cdc42-interacting 4 isoform X1	canonical	WYKGQTLLSQTTFTDTSITPVNEVAK	n[15]W[202]YKGQTLLSQTTFTDTSITPVNEVAK	1245	0	0	0	0	0	0	0	0	0	0	0	0	0	0	0	0	1	0	0
n-Term	A0A498L810	Cytoplasmic 1	marginally distinguished	AVFPSIVGRPRHQGVMVGMGQKDSYVGDEAQSK	n[15]AVFPSIVGRPRHQGVM[147]VGMGQKDSYVGDEAQSK	34	0	0	0	0	0	0	0	1	0	0	0	0	0	0	0	0	0	0	0
n-Term	A0A498L810	Cytoplasmic 1	marginally distinguished	CDVDIRKDLYANTVLSGGTTMYPGIADR	n[15]C[143]DVDIR[170]KDLYANTVLSGGTTMYPGIADR	290, 295	0	0	0	0	0	0	0	0	0	2	0	0	0	0	0	0	0	0	0
n-Term	A0A498L810	Cytoplasmic 1	marginally distinguished	CDVDIRKDLYANTVLSGGTTMYPGIADR	n[15]C[160]DVDIRKDLYANTVLSGGTTMYPGIADR	290	0	0	1	1	3	0	0	2	0	2	0	0	0	0	0	0	0	0	0
n-Term	A0A498L810	Cytoplasmic 1	marginally distinguished	CDVDIRKDLYANTVLSGGTTMYPGIADR	n[15]C[160]DVDIRKDLYANTVLSGGTTM[147]YPGIADR	290	0	0	0	0	0	0	0	0	0	1	0	0	0	0	0	0	0	0	0
n-Term	A0A498L810	Cytoplasmic 1	marginally distinguished	CDVDIRKDLYANTVLSGGTTMYPGIADR	n[15]C[160]DVDIRKDLYAN[115]TVLSGGTTMYPGIADR	290	0	0	0	1	1	0	0	0	0	0	0	0	0	0	0	0	0	0	0
n-Term	A0A498L810	Cytoplasmic 1	marginally distinguished	CPESLFQPSFLGMESCGIHETTFNSIMK	n[15]C[160]PESLFQPSFLGMESC[160]GIHETTFNSIMK	262	0	0	0	0	0	0	1	0	0	0	0	0	0	0	0	0	0	0	0
n-Term	A0A498L810	Cytoplasmic 1	marginally distinguished	DLYANTVLSGGTTMYPGIADR	n[15]DLYANTVLSGGTTMYPGIADR	297	0	0	0	0	0	0	0	0	0	0	0	0	0	0	0	1	0	0	0
n-Term	A0A498L810	Cytoplasmic 1	marginally distinguished	DSYVGDEAQSKR	n[15]DSYVGDEAQSKR	56	0	0	0	0	0	0	0	1	0	0	0	0	0	0	0	0	0	0	0
n-Term	A0A498L810	Cytoplasmic 1	marginally distinguished	FRCPESLFQPSFLGMESCGIHETTFNSIMK	n[15]FRC[160]PESLFQPSFLGMESC[160]GIHETTFNSIMK	260	0	0	1	1	0	0	0	0	0	2	0	0	0	0	0	0	0	0	0
n-Term	A0A498L810	Cytoplasmic 1	marginally distinguished	FRCPESLFQPSFLGMESCGIHETTFNSIMK	n[15]FRC[160]PESLFQPSFLGMESC[160]GIHETTFN[115]SIMK	260	0	0	0	0	0	0	0	0	0	2	0	0	0	0	0	0	0	1	0
n-Term	A0A498L810	Cytoplasmic 1	marginally distinguished	FRCPESLFQPSFLGMESCGIHETTFNSIMK	n[15]FRC[160]PESLFQPSFLGM[147]ESC[160]GIHETTFNSIMK	260	0	0	0	0	0	0	0	0	0	1	0	0	0	0	0	0	0	0	0
n-Term	A0A498L810	Cytoplasmic 1	marginally distinguished	HQGVMVGMGQKDSYVGDEAQSK	n[15]HQGVMVGMGQK[170]DSYVGDEAQSK	45	1	0	0	1	2	0	0	5	0	0	0	0	0	0	0	0	0	0	0
n-Term	A0A498L810	Cytoplasmic 1	marginally distinguished	HQGVMVGMGQKDSYVGDEAQSK	n[15]HQGVMVGM[147]GQK[170]DSYVGDEAQSK	45	0	0	0	0	0	0	0	3	0	0	0	0	0	0	0	0	0	0	0
n-Term	A0A498L810	Cytoplasmic 1	marginally distinguished	HQGVMVGMGQKDSYVGDEAQSK	n[15]HQGVM[147]VGMGQK[170]DSYVGDEAQSK	45	1	0	0	0	1	0	0	5	0	0	0	0	0	0	0	0	0	0	0
n-Term	A0A498L810	Cytoplasmic 1	marginally distinguished	HQGVMVGMGQKDSYVGDEAQSK	n[15]HQGVM[147]VGM[147]GQKDSYVGDEAQSK	45	4	0	2	0	1	0	0	1	0	0	2	0	0	0	0	0	0	0	0
n-Term	A0A498L810	Cytoplasmic 1	marginally distinguished	HQGVMVGMGQKDSYVGDEAQSKR	n[15]HQGVMVGMGQKDSYVGDEAQSKR	45	0	0	0	0	0	0	0	0	0	0	0	0	0	0	0	0	0	0	1
n-Term	A0A498L810	Cytoplasmic 1	marginally distinguished	HQGVMVGMGQKDSYVGDEAQSKR	n[15]HQGVMVGMGQK[170]DSYVGDEAQSKR	45	12	0	8	17	12	0	9	15	0	11	4	0	0	0	0	2	3	2	4
n-Term	A0A498L810	Cytoplasmic 1	marginally distinguished	HQGVMVGMGQKDSYVGDEAQSKR	n[15]HQGVMVGM[147]GQK[170]DSYVGDEAQSKR	45	2	0	1	0	0	0	0	3	0	0	0	0	0	0	0	1	0	0	0
n-Term	A0A498L810	Cytoplasmic 1	marginally distinguished	HQGVMVGMGQKDSYVGDEAQSKR	n[15]HQGVM[147]VGMGQK[170]DSYVGDEAQSKR	45	2	0	2	1	1	0	2	4	0	5	0	0	0	0	0	0	0	1	1
n-Term	A0A498L810	Cytoplasmic 1	marginally distinguished	IWHHTFYNELRVAPEEHPVLLTEAPLNPK	n[15]IWHHTFYN[115]ELRVAPEEHPVLLTEAPLNPK	90	0	0	0	0	0	0	0	0	1	0	0	0	0	0	0	0	0	0	0
n-Term	A0A498L810	Cytoplasmic 1	marginally distinguished	KDLYANTVLSGGTTMYPGIADR	n[15]KDLYANTVLSGGTTMYPGIADR	296	3	0	0	0	0	0	0	0	0	1	0	2	0	0	0	1	0	0	0
n-Term	A0A498L810	Cytoplasmic 1	marginally distinguished	KDLYANTVLSGGTTMYPGIADR	n[15]KDLYAN[115]TVLSGGTTMYPGIADR	296	1	0	0	0	0	0	0	0	0	0	0	0	0	0	0	0	0	0	0
n-Term	A0A498L810	Cytoplasmic 1	marginally distinguished	LCYVALDFEQEMGTAASSSSLEK	n[15]LC[160]YVALDFEQEMGTAASSSSLEK	221	61	1	0	6	9	0	0	2	0	0	1	0	0	0	0	1	0	0	0
n-Term	A0A498L810	Cytoplasmic 1	marginally distinguished	MQKEITSLAPSTMK	n[15]MQKEITSLAPSTMK	318	0	0	0	0	0	0	0	0	0	1	0	0	0	0	0	1	0	0	0
n-Term	A0A498L810	Cytoplasmic 1	marginally distinguished	MQKEITSLAPSTMK	n[15]MQK[170]EITSLAPSTMK	318	0	0	0	0	0	0	0	0	0	0	0	0	0	0	0	0	0	0	1
n-Term	A0A498L849	Neuronal membrane glyco M6-a	canonical	SKEEQELHDIHSTR	n[15]SKEEQELHDIHSTR	256	0	0	0	0	0	0	0	0	0	0	0	0	0	0	0	0	0	0	1
n-Term	A0A498L864	Obscurin isoform X19	representative	TYVLLFK	n[15]TYVLLFK	2123	0	0	0	0	1	0	0	0	0	0	0	0	0	0	0	0	0	0	0
n-Term	A0A498L8E5	Histone H2A	subsumed	HLQLAVRNDEELNKLLGGVTIAQGGVLPNIQAVLLPK	n[15]HLQLAVR[170]N[115]DEELNKLLGGVTIAQGGVLPNIQAVLLPK	83, 89	0	0	2	0	0	0	0	0	0	0	0	0	0	0	0	0	0	0	0
n-Term	A0A498L8E5	Histone H2A	subsumed	NDEELNKLLGGVTIAQGGVLPNIQAVLLPK	n[15]NDEELNKLLGGVTIAQGGVLPNIQAVLLPK	90	0	0	1	0	0	0	0	0	0	0	0	0	0	0	0	1	0	0	1
n-Term	A0A498L8G6	Type I cytoskeletal 19-like protein	subsumed	SRLEQEIATYR	n[15]SRLEQEIATYR	383, 913	0	0	0	0	0	0	0	0	2	2	0	0	0	0	0	0	2	0	2
n-Term	A0A498L8H6	Histone H1-like protein	representative	AETAPAAAAPPAK	n[15]AETAPAAAAPPAK	77	0	0	0	0	0	0	0	0	0	0	0	0	0	0	0	0	1	0	0
n-Term	A0A498L8H6	Histone H1-like protein	representative	AETAPAAAAPPAKAPK	n[15]AETAPAAAAPPAKAPK	77	0	0	0	0	0	0	0	0	0	0	0	0	0	0	0	0	1	0	0
n-Term	A0A498L8H6	Histone H1-like protein	representative	KALSAGGYDVEKNNSR	n[15]K[170]ALSAGGYDVEKNNSR	130	0	0	0	0	0	0	0	0	0	0	0	0	0	0	0	0	1	0	0
n-Term	A0A498L8H6	Histone H1-like protein	representative	KPAAAKKPAKSPK	n[15]K[142]PAAAK[142]K[170]PAKS[167]PK	229, 234	0	0	0	0	0	0	0	0	0	0	0	0	0	0	0	3	0	0	0
n-Term	A0A498L8K0	ADP ATP translocase 1	canonical	SDAVISFLKDFLAGGVAAAISKTAVAPIER	n[15]SDAVISFLK[142]DFLAGGVAAAISK[170]TAVAPIER	2, 10	0	0	0	0	0	0	0	0	0	0	0	0	0	0	0	2	0	0	0
n-Term	A0A498L8Q3	Histone H4	indistinguishable representative	KESYAIYVYK	n[15]KESYAIYVYK	137	0	0	0	0	0	0	0	0	0	0	0	0	0	0	0	0	0	0	1
n-Term	A0A498L8Q3	Histone H4	indistinguishable representative	KESYAIYVYK	n[15]K[170]ESYAIYVYK	137	0	1	0	0	0	0	0	0	0	0	0	0	0	0	1	0	0	0	0
n-Term	A0A498L8Q3	Histone H4	indistinguishable representative	KTVTAMDVVYALK	n[15]KTVTAMDVVYALK	80	0	0	0	0	0	0	0	0	0	0	0	7	0	0	0	0	0	0	2
n-Term	A0A498L8Q3	Histone H4	indistinguishable representative	KTVTAMDVVYALKR	n[15]KTVTAMDVVYALKR	80	0	0	0	0	0	0	0	0	0	2	0	0	0	0	0	0	0	0	2
n-Term	A0A498L8Q3	Histone H4	indistinguishable representative	KTVTAMDVVYALKR	n[15]K[170]TVTAMDVVYALKR	80	0	0	0	4	1	0	2	0	0	8	0	0	0	0	0	0	4	0	1
n-Term	A0A498L8Q3	Histone H4	indistinguishable representative	KTVTAMDVVYALKR	n[15]K[170]TVTAM[147]DVVYALKR	80	0	0	0	0	0	0	1	0	0	0	0	0	0	0	0	0	0	0	0
n-Term	A0A498L8Q3	Histone H4	indistinguishable representative	KVLRDNIQGITK	n[15]K[142]VLRDNIQGITK	21	0	0	0	0	0	0	0	0	0	2	0	0	0	0	0	0	2	0	0
n-Term	A0A498L8Q3	Histone H4	indistinguishable representative	KVLRDNIQGITKPAIR	n[15]KVLR[170]DN[115]IQGITKPAIR	21, 24	0	0	0	0	0	0	0	0	0	0	0	0	0	0	0	0	0	0	2
n-Term	A0A498L8Q3	Histone H4	indistinguishable representative	KVLRDNIQGITKPAIR	n[15]K[142]VLRDN[115]IQGITKPAIR	21	0	0	0	0	0	0	0	0	0	0	0	0	0	0	0	0	2	0	0
n-Term	A0A498L8Q3	Histone H4	indistinguishable representative	KVLRDNIQGITKPAIR	n[15]K[170]VLRDNIQGITKPAIR	21	0	0	0	0	0	0	0	0	0	1	0	0	0	0	0	0	0	0	0
n-Term	A0A498L8Q3	Histone H4	indistinguishable representative	KVLRDNIQGITKPAIR	n[15]K[170]VLR[170]DN[115]IQGITKPAIR	21, 24	0	0	0	0	0	0	0	0	0	2	0	0	0	0	0	0	0	0	0
n-Term	A0A498L8Q3	Histone H4	indistinguishable representative	RKTVTAMDVVYALK	n[15]RKTVTAMDVVYALK	79	0	0	0	0	0	0	0	0	0	0	0	0	0	0	0	0	0	0	1
n-Term	A0A498L8Q3	Histone H4	indistinguishable representative	SRKESYAIYVYK	n[15]SRKESYAIYVYK	135	0	0	0	0	0	0	1	0	0	0	0	0	0	0	0	0	0	0	1
n-Term	A0A498L8Q3	Histone H4	indistinguishable representative	VLKQVHPDTGISSK	n[15]VLKQVHPDTGISSK[142]	147, 160	0	0	0	0	0	0	0	0	0	0	0	2	0	0	0	0	0	0	0
n-Term	A0A498L8V3	Myosin heavy fast skeletal muscle-like protein	canonical	MQGSLEDQIIAANPLLEAYGNAK	n[15]MQGSLEDQIIAAN[115]PLLEAYGNAK	214	2	0	0	0	0	0	0	0	0	0	0	0	0	0	0	0	0	0	0
n-Term	A0A498L8V3	Myosin heavy fast skeletal muscle-like protein	canonical	RVEAPPHIFSISDNAYQFMLTDR	n[15]RVEAPPHIFSISDNAYQFMLTDR	148	1	0	0	0	0	0	0	0	0	0	0	0	0	0	0	0	0	0	0
n-Term	A0A498L8Y5	Histone H2B	subsumed	KESYAIYVYK	n[15]KESYAIYVYK	33	0	0	0	0	0	0	0	0	0	0	0	0	0	0	0	0	0	0	1
n-Term	A0A498L8Y5	Histone H2B	subsumed	KESYAIYVYK	n[15]K[170]ESYAIYVYK	33	0	1	0	0	0	0	0	0	0	0	0	0	0	0	1	0	0	0	0
n-Term	A0A498L8Y5	Histone H2B	subsumed	SRKESYAIYVYK	n[15]SRKESYAIYVYK	31	0	0	0	0	0	0	1	0	0	0	0	0	0	0	0	0	0	0	1
n-Term	A0A498L8Y5	Histone H2B	subsumed	VLKQVHPDTGISSK	n[15]VLKQVHPDTGISSK[142]	43, 56	0	0	0	0	0	0	0	0	0	0	0	2	0	0	0	0	0	0	0
n-Term	A0A498L989	Histone H2A	marginally distinguished	HLQLAVRNDEELNKLLGGVTIAQGGVLPNIQAVLLPK	n[15]HLQLAVR[170]N[115]DEELNKLLGGVTIAQGGVLPNIQAVLLPK	83, 89	0	0	2	0	0	0	0	0	0	0	0	0	0	0	0	0	0	0	0
n-Term	A0A498L989	Histone H2A	marginally distinguished	NDEELNKLLGGVTIAQGGVLPNIQAVLLPK	n[15]NDEELNKLLGGVTIAQGGVLPNIQAVLLPK	90	0	0	1	0	0	0	0	0	0	0	0	0	0	0	0	1	0	0	1
n-Term	A0A498L998	Histone H1-like protein	indistinguishable representative	AETAPAAAAPPAK	n[15]AETAPAAAAPPAK	2	0	0	0	0	0	0	0	0	0	0	0	0	0	0	0	0	1	0	0
n-Term	A0A498L998	Histone H1-like protein	indistinguishable representative	KALAAGGYDVEKNNSR	n[15]K[170]ALAAGGYDVEKNNSR	55	0	0	0	0	0	0	0	0	0	0	0	0	0	0	0	0	1	0	0
n-Term	A0A498L9A0	Gamma-crystallin M2-like protein	subsumed	RGDYADYMSMFGMNNCIR	n[15]RGDYADYMSMFGMNNC[160]IR[170]	61, 78	0	0	4	0	0	0	0	0	0	0	0	0	0	0	0	0	0	0	0
n-Term	A0A498L9A0	Gamma-crystallin M2-like protein	subsumed	RGDYADYMSMFGMNNCIR	n[15]RGDYADYMSMFGMN[115]NC[160]IR	61	0	0	1	0	0	0	0	0	0	0	0	0	0	0	0	0	0	0	0
n-Term	A0A498L9A0	Gamma-crystallin M2-like protein	subsumed	RGDYADYMSMFGMNNCIR	n[15]RGDYADYMSMFGM[147]NNC[160]IR[170]	61, 78	0	0	2	0	0	0	0	0	0	0	0	0	0	0	0	0	0	0	0
n-Term	A0A498L9F1	Tubulin beta chain	representative	GLKMAATFIGNSTAIQELFKR	n[15]GLK[170]MAATFIGNSTAIQELFKR	360	0	0	0	0	0	0	2	0	0	0	0	0	0	0	0	0	0	0	0
n-Term	A0A498L9F1	Tubulin beta chain	representative	KEAESCDCLQGFQLTHSLGGGTGSGMGTLLISK	n[15]KEAESC[160]DC[160]LQGFQLTHSLGGGTGSGMGTLLISK	122	0	0	0	0	0	0	3	0	0	0	11	0	0	2	0	0	0	2	0
n-Term	A0A498L9F1	Tubulin beta chain	representative	KLAVNMVPFPR	n[15]KLAVNMVPFPR	252	0	0	0	0	0	0	0	0	0	0	0	0	0	0	0	0	0	0	1
n-Term	A0A498L9F1	Tubulin beta chain	representative	MAATFIGNSTAIQELFKR	n[15]M[147]AATFIGNSTAIQELFK[142]R	363, 379	0	0	0	0	0	0	0	0	0	0	2	0	0	0	0	0	0	0	0
n-Term	A0A498L9F1	Tubulin beta chain	representative	MSMKEVDEQMLNVQNK	n[15]MSMKEVDEQMLNVQNK	321	0	0	0	0	0	0	0	0	0	0	1	0	0	0	0	0	0	0	0
n-Term	A0A498L9F1	Tubulin beta chain	representative	SGPFGQIFRPDNFVFGQSGAGNNWAK	n[15]SGPFGQIFRPDNFVFGQSGAGN[115]NWAK	78	0	0	0	0	0	0	1	0	0	0	0	0	0	0	0	0	0	0	0
n-Term	A0A498L9F1	Tubulin beta chain	representative	TLKLTTPTYGDLNHLVSATMSGVTTCLR	n[15]TLK[170]LTTPTYGDLN[115]HLVSATMSGVTTC[160]LR	214	0	0	0	0	0	0	1	0	0	0	0	0	0	0	0	0	0	0	0
n-Term	A0A498L9M7	Coronin	indistinguishable representative	KCEPIVMTVPR	n[15]KC[160]EPIVMTVPR	615	0	0	0	1	0	0	0	0	0	6	0	0	0	0	0	0	1	0	0
n-Term	A0A498L9R0	Histone H1-like protein	marginally distinguished	KALAAGGYDVEKNNSR	n[15]K[170]ALAAGGYDVEKNNSR	56	0	0	0	0	0	0	0	0	0	0	0	0	0	0	0	0	1	0	0
n-Term	A0A498L9S7	Histone H2A	subsumed	HLQLAVRNDEELNKLLGGVTIAQGGVLPNIQAVLLPK	n[15]HLQLAVR[170]N[115]DEELNKLLGGVTIAQGGVLPNIQAVLLPK	83, 89	0	0	2	0	0	0	0	0	0	0	0	0	0	0	0	0	0	0	0
n-Term	A0A498L9S7	Histone H2A	subsumed	NDEELNKLLGGVTIAQGGVLPNIQAVLLPK	n[15]NDEELNKLLGGVTIAQGGVLPNIQAVLLPK	90	0	0	1	0	0	0	0	0	0	0	0	0	0	0	0	1	0	0	1
n-Term	A0A498L9T6	Histone H4	representative	KTVTAMDVVYALK	n[15]KTVTAMDVVYALK	80	0	0	0	0	0	0	0	0	0	0	0	7	0	0	0	0	0	0	2
n-Term	A0A498L9T6	Histone H4	representative	KTVTAMDVVYALKR	n[15]KTVTAMDVVYALKR	80	0	0	0	0	0	0	0	0	0	2	0	0	0	0	0	0	0	0	2
n-Term	A0A498L9T6	Histone H4	representative	KTVTAMDVVYALKR	n[15]K[170]TVTAMDVVYALKR	80	0	0	0	4	1	0	2	0	0	8	0	0	0	0	0	0	4	0	1
n-Term	A0A498L9T6	Histone H4	representative	KTVTAMDVVYALKR	n[15]K[170]TVTAM[147]DVVYALKR	80	0	0	0	0	0	0	1	0	0	0	0	0	0	0	0	0	0	0	0
n-Term	A0A498L9T6	Histone H4	representative	KVLRDNIQGITK	n[15]K[142]VLRDNIQGITK	21	0	0	0	0	0	0	0	0	0	2	0	0	0	0	0	0	2	0	0
n-Term	A0A498L9T6	Histone H4	representative	KVLRDNIQGITKPAIR	n[15]KVLR[170]DN[115]IQGITKPAIR	21, 24	0	0	0	0	0	0	0	0	0	0	0	0	0	0	0	0	0	0	2
n-Term	A0A498L9T6	Histone H4	representative	KVLRDNIQGITKPAIR	n[15]K[142]VLRDN[115]IQGITKPAIR	21	0	0	0	0	0	0	0	0	0	0	0	0	0	0	0	0	2	0	0
n-Term	A0A498L9T6	Histone H4	representative	KVLRDNIQGITKPAIR	n[15]K[170]VLRDNIQGITKPAIR	21	0	0	0	0	0	0	0	0	0	1	0	0	0	0	0	0	0	0	0
n-Term	A0A498L9T6	Histone H4	representative	KVLRDNIQGITKPAIR	n[15]K[170]VLR[170]DN[115]IQGITKPAIR	21, 24	0	0	0	0	0	0	0	0	0	2	0	0	0	0	0	0	0	0	0
n-Term	A0A498L9T6	Histone H4	representative	RKTVTAMDVVYALK	n[15]RKTVTAMDVVYALK	79	0	0	0	0	0	0	0	0	0	0	0	0	0	0	0	0	0	0	1
n-Term	A0A498L9U3	Histone H2A	subsumed	HLQLAVRNDEELNKLLGGVTIAQGGVLPNIQAVLLPK	n[15]HLQLAVR[170]N[115]DEELNKLLGGVTIAQGGVLPNIQAVLLPK	83, 89	0	0	2	0	0	0	0	0	0	0	0	0	0	0	0	0	0	0	0
n-Term	A0A498L9U3	Histone H2A	subsumed	NDEELNKLLGGVTIAQGGVLPNIQAVLLPK	n[15]NDEELNKLLGGVTIAQGGVLPNIQAVLLPK	90	0	0	1	0	0	0	0	0	0	0	0	0	0	0	0	1	0	0	1
n-Term	A0A498L9V4	Histone H1-like protein	indistinguishable representative	KALAAGGYDVEKNNSR	n[15]K[170]ALAAGGYDVEKNNSR	56	0	0	0	0	0	0	0	0	0	0	0	0	0	0	0	0	1	0	0
n-Term	A0A498L9X1	Myofibril-bound serine ase	representative	GCARPGYPGVYTELCR	n[15]GC[160]ARPGYPGVYTELC[160]R	158	0	0	0	0	0	0	3	0	0	0	2	0	0	0	0	0	0	0	0
n-Term	A0A498L9X1	Myofibril-bound serine ase	representative	GGKDSCQGDSGGPVVCNGKLQGVVSFGR	n[15]GGKDSC[160]QGDSGGPVVC[160]N[115]GKLQGVVSFGR	130	0	0	0	0	0	0	0	0	0	1	0	0	0	0	0	0	0	0	0
n-Term	A0A498LA53	Type I cytoskeletal 13-like protein	canonical	KVVTIVEEVVDGK	n[15]K[170]VVTIVEEVVDGK	405	0	1	0	0	0	0	0	0	0	0	0	0	0	0	0	0	0	0	0
n-Term	A0A498LA53	Type I cytoskeletal 13-like protein	canonical	SEALNKEVAVSTETLQISR	n[15]SEALN[115]K[170]EVAVSTETLQISR	276	0	1	0	1	0	0	0	0	0	0	0	0	0	0	0	0	0	0	0
n-Term	A0A498LA73	Histone H3	indistinguishable	FQSAAIGALQEASEAYLVGLFEDTNLCAIHAK	n[15]FQSAAIGALQEASEAYLVGLFEDTNLC[160]AIHAK	85	0	0	0	0	0	0	0	0	0	0	0	0	0	0	0	0	1	0	0
n-Term	A0A498LA73	Histone H3	indistinguishable	FQSAAIGALQEASEAYLVGLFEDTNLCAIHAK	n[15]FQSAAIGALQEASEAYLVGLFEDTN[115]LC[160]AIHAK	85	0	0	0	0	0	0	0	0	0	0	0	0	0	0	0	0	1	0	1
n-Term	A0A498LAB9	Peptidyl-prolyl cis-trans isomerase (PPIase) (EC 5.2.1.8)	canonical	TDGRDKPLKDVIIHDSGK	n[15]T[181]DGRDKPLKDVIIHDSGK	187	0	0	0	0	0	0	0	0	0	0	0	0	0	0	0	0	1	0	0
n-Term	A0A498LAB9	Peptidyl-prolyl cis-trans isomerase (PPIase) (EC 5.2.1.8)	canonical	TVPKTTENFLQLATGEK	n[15]TVPK[170]TTENFLQLATGEK	68	0	0	0	0	0	0	0	0	0	0	0	0	0	0	0	1	0	0	0
n-Term	A0A498LAD7	Myosin heavy fast skeletal muscle-like protein	canonical	RIEAPPHIFSISDNAYQFMLTDR	n[15]RIEAPPHIFSISDNAYQFMLTDR	148	1	0	0	0	0	0	0	0	0	0	0	0	0	0	0	0	0	0	0
n-Term	A0A498LAD9	Ubiquitin-40S ribosomal S27a	indistinguishable representative	IQDKEGIPPDQQR	n[15]IQDKEGIPPDQQR	30	0	0	0	0	0	0	0	0	0	0	0	2	0	0	0	0	0	0	0
n-Term	A0A498LAD9	Ubiquitin-40S ribosomal S27a	indistinguishable representative	QLEDGRTLSDYNIQKESTLHLVLR	n[15]Q[111]LEDGRTLSDYNIQKESTLHLVLR	49	0	0	0	0	0	0	0	0	0	0	0	0	0	1	0	0	0	0	0
n-Term	A0A498LAI7	Polyadenylate-binding protein (PABP)	canonical	IVATKPLYVALAQR	n[15]IVATK[170]PLYVALAQR	357	0	0	0	0	0	0	0	0	0	0	0	0	0	0	0	2	0	0	0
n-Term	A0A498LAL7	Cellular retinoic acid-binding 1	canonical	PPNFAGTWK	n[15]PPN[115]FAGTWK	2	0	0	0	0	0	0	0	0	0	0	0	1	0	0	0	0	0	0	0
n-Term	A0A498LAU6	L-lactate dehydrogenase (EC 1.1.1.27)	indistinguishable representative	KCHPVSALVK	n[15]KC[160]HPVSALVK	289	2	0	0	1	4	0	0	0	0	0	0	0	0	0	0	0	0	0	0
n-Term	A0A498LAU6	L-lactate dehydrogenase (EC 1.1.1.27)	indistinguishable representative	LKGEAMDLQHGSLFLK	n[15]LK[170]GEAMDLQHGSLFLK	78	1	0	0	0	0	0	0	0	0	0	0	0	0	0	0	0	0	0	0
n-Term	A0A498LB17	Tropomyosin alpha-3 chain isoform X6	canonical	LATALQKLEEAEKAADESER	n[15]LATALQK[170]LEEAEKAADESER	70	2	0	0	0	0	0	0	0	0	0	0	0	0	0	0	0	0	0	0
n-Term	A0A498LB77	Cysteine and glycine-rich 1	indistinguishable representative	KNLDSTTVAVHENEIYCK	n[15]K[170]N[115]LDSTTVAVHENEIYC[160]K	11	0	0	0	0	0	0	0	2	0	0	0	0	0	0	0	0	0	0	0
n-Term	A0A498LBG8	Arginine-glutamic acid dipeptide repeats-like isoform X1	canonical	FGANAILGVSLAVCK	n[15]FGANAILGVSLAVC[160]K	106	1	0	0	0	0	0	0	0	0	0	0	0	0	0	0	0	0	0	0
n-Term	A0A498LBG8	Arginine-glutamic acid dipeptide repeats-like isoform X1	canonical	MSILKIHAR	n[15]M[147]SILK[142]IHAR[170]	1, 5, 9	0	0	0	0	0	0	0	0	0	0	0	0	0	0	0	0	0	0	3
n-Term	A0A498LBI5	Cytoplasmic dynein 1 heavy chain 1 isoform X2	canonical	LPAFKDLVAKVQADEQFFMWIESNSPELSVPYLWTEEK	n[15]LPAFKDLVAKVQADEQFFMWIES[167]NS[167]PELS[167]VPYLWTEEK[170]	654	0	0	0	0	0	0	0	0	0	0	0	0	0	0	0	0	0	0	1
n-Term	A0A498LBQ1	Tubulin beta chain	canonical	KESESCDCLQGFQLTHSLGGGTGSGMGTLLISK	n[15]KESESC[160]DC[160]LQGFQLTHSLGGGTGSGMGTLLISK	122	0	0	0	0	0	0	0	0	0	0	2	0	0	0	0	0	0	0	0
n-Term	A0A498LBQ1	Tubulin beta chain	canonical	KLAVNMVPFPR	n[15]KLAVNMVPFPR	252	0	0	0	0	0	0	0	0	0	0	0	0	0	0	0	0	0	0	1
n-Term	A0A498LBQ1	Tubulin beta chain	canonical	MSMKEVDEQMLNVQNK	n[15]MSMKEVDEQMLNVQNK	321	0	0	0	0	0	0	0	0	0	0	1	0	0	0	0	0	0	0	0
n-Term	A0A498LBQ1	Tubulin beta chain	canonical	SGPFGQIFRPDNFVFGQSGAGNNWAK	n[15]SGPFGQIFRPDNFVFGQSGAGN[115]NWAK	78	0	0	0	0	0	0	1	0	0	0	0	0	0	0	0	0	0	0	0
n-Term	A0A498LBQ1	Tubulin beta chain	canonical	TLKLTTPTYGDLNHLVSATMSGVTTCLR	n[15]TLK[170]LTTPTYGDLN[115]HLVSATMSGVTTC[160]LR	214	0	0	0	0	0	0	1	0	0	0	0	0	0	0	0	0	0	0	0
n-Term	A0A498LBV9	Solute carrier family facilitated glucose transporter member 2	canonical	KNEDICPSTHNMDVPNIK	n[15]KNEDIC[160]PSTHNMDVPNIK	490	0	0	0	0	0	0	0	0	0	1	0	0	0	0	0	0	0	0	0
n-Term	A0A498LBX2	Alpha-internexin-like protein	canonical	VHEEEVTELMNMIQASQVSVEMEVAKPDLTSALK	n[15]VHEEEVTELMN[115]MIQASQVSVEMEVAKPDLTSALK	224	0	0	0	0	0	0	0	0	0	0	1	0	0	0	0	0	0	0	0
n-Term	A0A498LBY4	Histone H2A	subsumed	HLQLAVRNDEELNKLLGGVTIAQGGVLPNIQAVLLPK	n[15]HLQLAVR[170]N[115]DEELNKLLGGVTIAQGGVLPNIQAVLLPK	66, 72	0	0	2	0	0	0	0	0	0	0	0	0	0	0	0	0	0	0	0
n-Term	A0A498LBY4	Histone H2A	subsumed	NDEELNKLLGGVTIAQGGVLPNIQAVLLPK	n[15]NDEELNKLLGGVTIAQGGVLPNIQAVLLPK	73	0	0	1	0	0	0	0	0	0	0	0	0	0	0	0	1	0	0	1
n-Term	A0A498LC17	Cystathionine beta-synthase-like protein	canonical	LHNKPTFSQTILIQNIYR	n[15]LHNKPTFSQTILIQNIYR	36	0	0	0	0	0	0	0	0	0	0	0	0	0	2	0	0	0	0	0
n-Term	A0A498LC17	Cystathionine beta-synthase-like protein	canonical	RYRLPSNVDQSAITCTLSADGLLTLCGPK	n[15]RYRLPSNVDQSAITC[160]TLSADGLLTLC[160]GPK	736	0	0	1	0	0	0	0	0	0	0	0	0	0	0	0	0	0	0	0
n-Term	A0A498LC17	Cystathionine beta-synthase-like protein	canonical	RYRLPSNVDQSAITCTLSADGLLTLCGPK	n[15]RYRLPSN[115]VDQSAITC[160]TLSADGLLTLC[160]GPK	736	0	0	1	0	0	0	0	0	0	0	0	0	0	0	0	0	0	0	0
n-Term	A0A498LC17	Cystathionine beta-synthase-like protein	canonical	YRLPSNVDQSAITCTLSADGLLTLCGPK	n[15]YRLPSNVDQSAITC[160]TLSADGLLTLC[160]GPK	737	0	0	6	0	0	0	0	0	0	0	0	0	0	0	0	0	0	0	0
n-Term	A0A498LC85	F-box only 22-like protein	canonical	CSELEEELKTVTNNMK	n[15]C[160]SELEEELKTVTNNMK	166	0	0	0	0	3	0	0	0	0	0	0	0	0	0	0	0	0	0	0
n-Term	A0A498LC85	F-box only 22-like protein	canonical	CSELEEELKTVTNNMK	n[15]C[160]SELEEELKTVTNN[115]MK	166	2	0	0	0	0	0	0	0	0	0	0	0	0	0	0	0	0	0	0
n-Term	A0A498LC85	F-box only 22-like protein	canonical	CSELEEELKTVTNNMK	n[15]C[160]SELEEELKTVTN[115]NMK	166	7	0	0	0	6	0	0	0	0	0	0	0	0	0	0	0	0	0	0
n-Term	A0A498LC85	F-box only 22-like protein	canonical	KATDAEGDVASLNR	n[15]KATDAEGDVASLNR	53	0	0	0	1	0	0	0	0	0	0	0	1	0	0	0	0	1	0	0
n-Term	A0A498LC85	F-box only 22-like protein	canonical	LATALQKLEEAEKAADESER	n[15]LATALQK[170]LEEAEKAADESER	82	2	0	0	0	0	0	0	0	0	0	0	0	0	0	0	0	0	0	0
n-Term	A0A498LD75	High mobility group B2-like protein	canonical	VKNDNPGISIGDIAK	n[15]VK[170]N[115]DNPGISIGDIAK	241	0	0	0	0	0	0	0	0	0	0	0	0	0	0	0	0	1	0	0
n-Term	A0A498LDA5	Type II cytoskeletal 8	canonical	DTSVIVEMDNSRNLDMDAIVAEVR	n[15]DTSVIVEMDNSRNLDM[147]DAIVAEVR	195	0	0	1	0	0	0	0	0	0	0	0	0	0	0	0	0	0	0	0
n-Term	A0A498LDA5	Type II cytoskeletal 8	canonical	KLLEGEESR	n[15]KLLEGEESR	305	0	0	0	0	0	0	0	0	0	0	0	0	0	0	0	0	0	0	1
n-Term	A0A498LDA5	Type II cytoskeletal 8	canonical	KYEDEINKR	n[15]K[170]YEDEINKR	132	0	0	1	0	0	0	0	0	0	0	0	0	0	0	0	0	0	0	0
n-Term	A0A498LDE7	Histone H2A	indistinguishable representative	HLQLAVRNDEELNKLLGGVTIAQGGVLPNIQAVLLPK	n[15]HLQLAVR[170]N[115]DEELNKLLGGVTIAQGGVLPNIQAVLLPK	83, 89	0	0	2	0	0	0	0	0	0	0	0	0	0	0	0	0	0	0	0
n-Term	A0A498LDE7	Histone H2A	indistinguishable representative	NDEELNKLLGGVTIAQGGVLPNIQAVLLPK	n[15]NDEELNKLLGGVTIAQGGVLPNIQAVLLPK	90	0	0	1	0	0	0	0	0	0	0	0	0	0	0	0	1	0	0	1
n-Term	A0A498LDF4	Histone H1-like protein	indistinguishable	KALAAGGYDVEKNNSR	n[15]K[170]ALAAGGYDVEKNNSR	56	0	0	0	0	0	0	0	0	0	0	0	0	0	0	0	0	1	0	0
n-Term	A0A498LDI9	Putative ATP-dependent RNA helicase DDX6	subsumed	NRQILLYSATFPISVQK	n[15]NRQILLYSATFPISVQK	265	0	0	0	0	0	0	0	0	0	0	0	0	0	9	0	0	0	2	0
n-Term	A0A498LDI9	Putative ATP-dependent RNA helicase DDX6	subsumed	QKVHCLNTLFSR	n[15]Q[111]KVHC[160]LNTLFSR	315	0	0	0	0	0	0	0	0	0	0	0	0	0	1	0	0	0	0	0
n-Term	A0A498LDL0	Histone H3	subsumed	KSAPATGGVK	n[15]KSAPATGGVK[170]	28	0	0	0	0	0	0	0	0	0	0	0	0	0	0	0	0	0	0	1
n-Term	A0A498LDL0	Histone H3	subsumed	KSAPATGGVK	n[15]K[170]SAPATGGVK	28	0	0	0	0	0	0	0	0	0	0	0	0	0	0	0	1	2	0	3
n-Term	A0A498LDL0	Histone H3	subsumed	KSAPATGGVKKPHR	n[15]K[170]SAPATGGVK[142]KPHR	28, 37	0	0	0	0	0	0	0	0	0	0	0	0	0	0	0	0	0	0	4
n-Term	A0A498LE46	Tropomyosin alpha-1 chain isoform X2	canonical	AMKDEEKMEIQEMQLK	n[15]AMKDEEKMEIQEMQLK	134	0	0	0	0	0	0	0	0	0	0	0	0	0	1	0	0	0	0	0
n-Term	A0A498LE46	Tropomyosin alpha-1 chain isoform X2	canonical	KLVILEGELER	n[15]KLVILEGELER	168	0	0	0	0	0	0	0	1	0	0	0	0	0	0	0	0	1	0	0
n-Term	A0A498LE46	Tropomyosin alpha-1 chain isoform X2	canonical	LATALQKLEEAEKAADESER	n[15]LATALQK[170]LEEAEKAADESER	106	2	0	0	0	0	0	0	0	0	0	0	0	0	0	0	0	0	0	0
n-Term	A0A498LE54	Myelin basic-like protein	canonical	IFKMGGSQSASSTKR	n[15]IFK[170]M[147]GGSQSASSTKR	70	0	0	0	0	0	0	4	0	0	0	0	0	0	0	0	0	0	0	0
n-Term	A0A498LE54	Myelin basic-like protein	canonical	SKKNPTVMDQIGK	n[15]SKK[170]N[115]PTVM[147]DQIGK	16	0	0	0	0	0	0	1	0	0	0	0	0	0	0	0	0	0	0	0
n-Term	A0A498LE54	Myelin basic-like protein	canonical	SKKNPTVMDQIGK	n[15]SK[170]KN[115]PTVMDQIGK	16	0	0	0	0	0	0	1	0	0	0	0	0	0	0	0	0	0	0	0
n-Term	A0A498LE55	Myosin heavy fast skeletal muscle-like protein	indistinguishable representative	MQGSLEDQIIAANPLLEAYGNAK	n[15]MQGSLEDQIIAAN[115]PLLEAYGNAK	214	2	0	0	0	0	0	0	0	0	0	0	0	0	0	0	0	0	0	0
n-Term	A0A498LE55	Myosin heavy fast skeletal muscle-like protein	indistinguishable representative	RIEAPPHIFSISDNAYQFMLTDR	n[15]RIEAPPHIFSISDNAYQFMLTDR	147	1	0	0	0	0	0	0	0	0	0	0	0	0	0	0	0	0	0	0
n-Term	A0A498LE72	Myofibril-bound serine ase	marginally distinguished	GGKDSCQGDSGGPVVCNGKLQGVVSFGR	n[15]GGKDSC[160]QGDSGGPVVC[160]N[115]GKLQGVVSFGR	130	0	0	0	0	0	0	0	0	0	1	0	0	0	0	0	0	0	0	0
n-Term	A0A498LE80	Myofibril-bound serine ase	canonical	GGKDVCQGDSGGPVVCNGK	n[15]GGKDVC[160]QGDSGGPVVC[160]N[115]GK	129	0	0	0	0	0	0	0	0	0	1	0	0	0	0	0	0	0	0	0
n-Term	A0A498LE80	Myofibril-bound serine ase	canonical	TGAGPASTLQCLDLPVLSKK	n[15]TGAGPASTLQC[160]LDLPVLSKK	89	0	0	0	0	0	0	0	0	0	1	0	0	0	0	0	0	0	0	0
n-Term	A0A498LEA2	M-striated muscle-like isoform X2	representative	CHDANKDYVVVTWK	n[15]C[160]HDANKDYVVVTWK	241	5	0	0	0	0	0	0	0	0	0	0	1	0	0	0	0	0	0	0
n-Term	A0A498LEC3	Voltage-dependent anion-selective channel 1	marginally distinguished	GLKLTFDSSFSPNTGKK	n[15]GLKLTFDSSFSPNTGKK	162	0	0	0	0	0	0	0	0	0	0	0	0	0	0	0	0	0	0	1
n-Term	A0A498LEC5	Myosin heavy fast skeletal muscle-like protein	representative	RIEAPPHIFSISDNAYQFMLTDR	n[15]RIEAPPHIFSISDNAYQFMLTDR	147	1	0	0	0	0	0	0	0	0	0	0	0	0	0	0	0	0	0	0
n-Term	A0A498LED0	Myosin heavy fast skeletal muscle-like protein	representative	MQGSLEDQIIAANPLLEAYGNAK	n[15]MQGSLEDQIIAAN[115]PLLEAYGNAK	214	2	0	0	0	0	0	0	0	0	0	0	0	0	0	0	0	0	0	0
n-Term	A0A498LED0	Myosin heavy fast skeletal muscle-like protein	representative	RIEAPPHIFSISDNAYQFMLTDR	n[15]RIEAPPHIFSISDNAYQFMLTDR	147	1	0	0	0	0	0	0	0	0	0	0	0	0	0	0	0	0	0	0
n-Term	A0A498LED1	Uncharacterized protein	canonical	QDECYSDVKNQSVQIESR	n[15]QDEC[160]YSDVKNQSVQIESR	658	1	0	0	0	0	0	0	0	0	0	0	0	0	0	0	0	0	0	0
n-Term	A0A498LED3	Myosin heavy fast skeletal muscle-like protein	marginally distinguished	ERIEAQNTPFDAKTAYFVAEPAEMYLK	n[15]ERIEAQNTPFDAK[142]TAYFVAEPAEMYLK	172, 184	2	0	0	0	0	0	0	0	0	2	0	0	0	0	0	2	0	0	0
n-Term	A0A498LED3	Myosin heavy fast skeletal muscle-like protein	marginally distinguished	ERIEAQNTPFDAKTAYFVAEPAEMYLK	n[15]ER[170]IEAQNTPFDAKTAYFVAEPAEMYLK	172, 173	2	0	0	0	0	0	0	0	0	0	0	0	0	0	0	2	0	0	0
n-Term	A0A498LED3	Myosin heavy fast skeletal muscle-like protein	marginally distinguished	RIEAPPHIFSISDNAYQFMLTDR	n[15]RIEAPPHIFSISDNAYQFMLTDR	297	1	0	0	0	0	0	0	0	0	0	0	0	0	0	0	0	0	0	0
n-Term	A0A498LED7	Histone H2B	subsumed	KESYAIYVYK	n[15]KESYAIYVYK	23	0	0	0	0	0	0	0	0	0	0	0	0	0	0	0	0	0	0	1
n-Term	A0A498LED7	Histone H2B	subsumed	KESYAIYVYK	n[15]K[170]ESYAIYVYK	23	0	1	0	0	0	0	0	0	0	0	0	0	0	0	1	0	0	0	0
n-Term	A0A498LED7	Histone H2B	subsumed	SRKESYAIYVYK	n[15]SRKESYAIYVYK	21	0	0	0	0	0	0	1	0	0	0	0	0	0	0	0	0	0	0	1
n-Term	A0A498LED7	Histone H2B	subsumed	VLKQVHPDTGISSK	n[15]VLKQVHPDTGISSK[142]	33, 46	0	0	0	0	0	0	0	0	0	0	0	2	0	0	0	0	0	0	0
n-Term	A0A498LEH2	Histone H4	subsumed	KTVTAMDVVYALK	n[15]KTVTAMDVVYALK	80	0	0	0	0	0	0	0	0	0	0	0	7	0	0	0	0	0	0	2
n-Term	A0A498LEH2	Histone H4	subsumed	KTVTAMDVVYALKR	n[15]KTVTAMDVVYALKR	80	0	0	0	0	0	0	0	0	0	2	0	0	0	0	0	0	0	0	2
n-Term	A0A498LEH2	Histone H4	subsumed	KTVTAMDVVYALKR	n[15]K[170]TVTAMDVVYALKR	80	0	0	0	4	1	0	2	0	0	8	0	0	0	0	0	0	4	0	1
n-Term	A0A498LEH2	Histone H4	subsumed	KTVTAMDVVYALKR	n[15]K[170]TVTAM[147]DVVYALKR	80	0	0	0	0	0	0	1	0	0	0	0	0	0	0	0	0	0	0	0
n-Term	A0A498LEH2	Histone H4	subsumed	RKTVTAMDVVYALK	n[15]RKTVTAMDVVYALK	79	0	0	0	0	0	0	0	0	0	0	0	0	0	0	0	0	0	0	1
n-Term	A0A498LEH5	Fibrinogen gamma chain-like protein	canonical	APEAFLVYCEIDSFGR	n[15]APEAFLVYC[160]EIDSFGR	185	0	0	0	0	0	0	0	0	0	0	0	0	0	0	0	0	1	0	0
n-Term	A0A498LEH5	Fibrinogen gamma chain-like protein	canonical	EGFGYLSPDDKTEFWLGNEK	n[15]E[111]GFGY[243]LSPDDKTEFWLGNEK	224	0	0	0	0	0	0	0	0	0	0	0	0	0	0	0	0	2	0	0
n-Term	A0A498LEH5	Fibrinogen gamma chain-like protein	canonical	EPCKDTVEIQSVTGK	n[15]EPC[160]KDTVEIQSVTGK	148	0	0	0	0	0	0	0	0	0	1	0	0	0	0	0	0	4	0	1
n-Term	A0A498LEH5	Fibrinogen gamma chain-like protein	canonical	EPCKDTVEIQSVTGK	n[15]E[111]PC[160]KDTVEIQSVTGK	148	0	0	0	0	0	0	0	0	0	0	0	0	0	0	0	0	1	0	0
n-Term	A0A498LEH5	Fibrinogen gamma chain-like protein	canonical	EPCKDTVEIQSVTGKDCQDIANK	n[15]EPC[160]KDTVEIQSVTGKDC[160]QDIANK	148	0	0	0	0	0	0	0	0	0	0	0	0	0	0	0	0	1	0	0
n-Term	A0A498LEH5	Fibrinogen gamma chain-like protein	canonical	FEKSILAQEDQLYQLQSILQANEKR	n[15]FEK[170]SILAQEDQLYQLQSILQANEKR	107	0	0	0	0	0	0	0	0	0	0	0	0	0	0	0	0	1	0	0
n-Term	A0A498LEH5	Fibrinogen gamma chain-like protein	canonical	QMSLQLDQICKEPCKDTVEIQSVTGK	n[15]QMSLQLDQIC[160]K[142]EPC[160]K[170]DTVEIQSVTGK	137, 147	0	0	0	0	0	0	0	0	0	0	0	0	0	0	0	0	2	0	0
n-Term	A0A498LEH5	Fibrinogen gamma chain-like protein	canonical	QMSLQLDQICKEPCKDTVEIQSVTGK	n[15]QMSLQLDQ[111]IC[160]K[170]EPC[160]KDTVEIQSVTGK	137	0	0	0	0	0	0	0	0	0	0	0	0	0	0	0	0	1	0	0
n-Term	A0A498LEH5	Fibrinogen gamma chain-like protein	canonical	QMSLQLDQICKEPCKDTVEIQSVTGK	n[15]QMSLQ[111]LDQIC[160]KEPC[160]K[142]DTVEIQSVTGK	137, 151	0	0	0	0	0	0	0	0	0	0	0	0	0	0	0	0	2	0	0
n-Term	A0A498LEH5	Fibrinogen gamma chain-like protein	canonical	QMSLQLDQICKEPCKDTVEIQSVTGK	n[15]Q[111]M[147]SLQLDQIC[160]KEPC[160]KDTVEIQSVTGK	137	0	0	0	0	0	0	0	0	0	0	0	0	0	0	0	0	2	0	0
n-Term	A0A498LEJ3	Creatine kinase S-mitochondrial-like isoform X1	canonical	KHNNCMASALTPAIYAK	n[15]KHNNC[160]MASALTPAIYAK	58	4	0	0	0	0	0	0	0	0	0	0	0	0	0	0	0	0	0	0
n-Term	A0A498LEJ3	Creatine kinase S-mitochondrial-like isoform X1	canonical	TMKHPTDLDASKIHSAMFDENYVLSSR	n[15]TM[147]K[142]HPTDLDASKIHSAMFDENYVLSSR	137, 139	0	0	2	0	0	0	0	0	0	0	0	0	0	0	0	0	0	0	0
n-Term	A0A498LEN5	Xylosyltransferase 2-like isoform X1	subsumed	VKLQIWDTAGQER	n[15]VKLQIWDTAGQER	1017	0	0	0	0	0	0	0	0	0	0	0	0	0	0	0	0	1	0	0
n-Term	A0A498LET5	Myosin heavy fast skeletal muscle-like protein	marginally distinguished	MQGSLEDQIIAANPLLEAYGNAK	n[15]MQGSLEDQIIAAN[115]PLLEAYGNAK	213	2	0	0	0	0	0	0	0	0	0	0	0	0	0	0	0	0	0	0
n-Term	A0A498LET5	Myosin heavy fast skeletal muscle-like protein	marginally distinguished	RIEAPPHIFSISDNAYQFMLTDR	n[15]RIEAPPHIFSISDNAYQFMLTDR	147	1	0	0	0	0	0	0	0	0	0	0	0	0	0	0	0	0	0	0
n-Term	A0A498LEU6	Histone H2B	canonical	VLKQVHPDTGISSK	n[15]VLKQVHPDTGISSK[142]	43, 56	0	0	0	0	0	0	0	0	0	0	0	2	0	0	0	0	0	0	0
n-Term	A0A498LEV5	Aldehyde dehydrogenase family 9 member A1-B-like protein	canonical	GVKPVTLELGGK	n[15]GVKPVTLELGGK	226	0	0	0	1	0	0	0	0	0	0	0	0	0	0	0	0	0	0	0
n-Term	A0A498LEZ7	Periostin isoform X1	canonical	KAMVLYECCPGYMK	n[15]KAMVLYEC[160]C[160]PGYMK	67	0	0	1	0	0	0	0	0	0	0	0	0	0	0	0	0	0	0	0
n-Term	A0A498LEZ7	Periostin isoform X1	canonical	KAMVLYECCPGYMK	n[15]KAMVLYEC[160]C[160]PGYM[147]K	67	0	0	1	0	0	0	0	0	0	0	0	0	0	0	0	0	0	0	0
n-Term	A0A498LF02	Superoxide dismutase [Cu-Zn] (EC 1.15.1.1)	canonical	HVGDLGNVIAGDNGTAKIDIVDELVTLSGQHSVIGR	n[15]HVGDLGN[115]VIAGDNGTAKIDIVDELVTLSGQHSVIGR	81	0	0	0	0	0	0	0	0	0	0	0	0	0	0	0	1	0	0	0
n-Term	A0A498LFD6	Protein disulfide-isomerase (EC 5.3.4.1)	canonical	MDATANDIPHDSYKAEGFPTIYFAPSNKK	n[15]MDATAN[115]DIPHDSYK[170]AEGFPTIYFAPSNKK	2692	0	0	0	0	0	0	0	0	0	0	0	0	0	0	0	1	0	0	0
n-Term	A0A498LFE3	Myosin heavy chain, fast skeletal muscle-like	subsumed	ERIEAQNTPFDAKTAYFVAEPAEMYLK	n[15]ERIEAQNTPFDAK[142]TAYFVAEPAEMYLK	22, 34	2	0	0	0	0	0	0	0	0	2	0	0	0	0	0	2	0	0	0
n-Term	A0A498LFE3	Myosin heavy chain, fast skeletal muscle-like	subsumed	ERIEAQNTPFDAKTAYFVAEPAEMYLK	n[15]ER[170]IEAQNTPFDAKTAYFVAEPAEMYLK	22, 23	2	0	0	0	0	0	0	0	0	0	0	0	0	0	0	2	0	0	0
n-Term	A0A498LFE3	Myosin heavy chain, fast skeletal muscle-like	subsumed	RIEAPPHIFSISDNAYQFMLTDR	n[15]RIEAPPHIFSISDNAYQFMLTDR	242	1	0	0	0	0	0	0	0	0	0	0	0	0	0	0	0	0	0	0
n-Term	A0A498LFM1	ATP-dependent RNA helicase DDX1	canonical	TKIDCDNMEQYLIK	n[15]TKIDC[160]DNMEQYLIK	515	0	0	0	0	0	0	0	0	0	0	0	0	0	3	0	0	0	0	0
n-Term	A0A498LFT5	Glutaredoxin-3	canonical	KTTSFFGVGLRPSK	n[15]K[170]TTSFFGVGLRPSK	1340	0	0	0	0	0	0	0	0	0	0	0	0	0	0	0	0	0	3	0
n-Term	A0A498LFT5	Glutaredoxin-3	canonical	YALAALDAKVPVYSQAASSGSSALSQK	n[15]YALAALDAK[170]VPVYSQAASSGSSALSQK	767	0	0	0	0	0	0	0	0	0	0	0	0	0	0	0	0	0	2	0
n-Term	A0A498LG69	Alpha-1,4 glucan phosphorylase (EC 2.4.1.1)	canonical	GYNASEYYNRIPELKQAIDQIAGGFFSPK	n[15]GY[243]N[115]ASEYYNR[170]IPELK[170]QAIDQIAGGFFSPK	726, 735	2	0	0	0	0	0	0	0	0	0	0	0	0	0	0	0	0	0	0
n-Term	A0A498LG69	Alpha-1,4 glucan phosphorylase (EC 2.4.1.1)	canonical	RWLVMCNPGLAEVIAER	n[15]RWLVMC[160]NPGLAEVIAER	491	1	0	0	0	0	0	0	0	0	0	0	0	0	0	0	0	0	0	0
n-Term	A0A498LG81	Serine/threonine-protein phosphatase (EC 3.1.3.16)	representative	FKEPPAFGPMCDLLWSDPLEDFGNEK	n[15]FKEPPAFGPMC[160]DLLWSDPLEDFGNEK	188	0	0	0	0	0	0	0	0	0	0	1	0	0	0	0	0	0	0	0
n-Term	A0A498LGF7	Myosin heavy fast skeletal muscle-like protein	marginally distinguished	MQGSLEDQIIAANPLLEAYGNAK	n[15]MQGSLEDQIIAAN[115]PLLEAYGNAK	213	2	0	0	0	0	0	0	0	0	0	0	0	0	0	0	0	0	0	0
n-Term	A0A498LGF7	Myosin heavy fast skeletal muscle-like protein	marginally distinguished	RIEAPPHIFSISDNAYQFMLTDR	n[15]RIEAPPHIFSISDNAYQFMLTDR	147	1	0	0	0	0	0	0	0	0	0	0	0	0	0	0	0	0	0	0
n-Term	A0A498LGK1	Histone H4	subsumed	KTVTAMDVVYALK	n[15]KTVTAMDVVYALK	229	0	0	0	0	0	0	0	0	0	0	0	7	0	0	0	0	0	0	2
n-Term	A0A498LGK1	Histone H4	subsumed	KTVTAMDVVYALKR	n[15]KTVTAMDVVYALKR	229	0	0	0	0	0	0	0	0	0	2	0	0	0	0	0	0	0	0	2
n-Term	A0A498LGK1	Histone H4	subsumed	KTVTAMDVVYALKR	n[15]K[170]TVTAMDVVYALKR	229	0	0	0	4	1	0	2	0	0	8	0	0	0	0	0	0	4	0	1
n-Term	A0A498LGK1	Histone H4	subsumed	KTVTAMDVVYALKR	n[15]K[170]TVTAM[147]DVVYALKR	229	0	0	0	0	0	0	1	0	0	0	0	0	0	0	0	0	0	0	0
n-Term	A0A498LGK1	Histone H4	subsumed	KVLRDNIQGITK	n[15]K[142]VLRDNIQGITK	170	0	0	0	0	0	0	0	0	0	2	0	0	0	0	0	0	2	0	0
n-Term	A0A498LGK1	Histone H4	subsumed	KVLRDNIQGITKPAIR	n[15]KVLR[170]DN[115]IQGITKPAIR	170, 173	0	0	0	0	0	0	0	0	0	0	0	0	0	0	0	0	0	0	2
n-Term	A0A498LGK1	Histone H4	subsumed	KVLRDNIQGITKPAIR	n[15]K[142]VLRDN[115]IQGITKPAIR	170	0	0	0	0	0	0	0	0	0	0	0	0	0	0	0	0	2	0	0
n-Term	A0A498LGK1	Histone H4	subsumed	KVLRDNIQGITKPAIR	n[15]K[170]VLRDNIQGITKPAIR	170	0	0	0	0	0	0	0	0	0	1	0	0	0	0	0	0	0	0	0
n-Term	A0A498LGK1	Histone H4	subsumed	KVLRDNIQGITKPAIR	n[15]K[170]VLR[170]DN[115]IQGITKPAIR	170, 173	0	0	0	0	0	0	0	0	0	2	0	0	0	0	0	0	0	0	0
n-Term	A0A498LGK1	Histone H4	subsumed	RKTVTAMDVVYALK	n[15]RKTVTAMDVVYALK	228	0	0	0	0	0	0	0	0	0	0	0	0	0	0	0	0	0	0	1
n-Term	A0A498LGK8	Myosin heavy fast skeletal muscle-like protein	subsumed	ERIEAQNTPFDAKTAYFVAEPAEMYLK	n[15]ERIEAQNTPFDAK[142]TAYFVAEPAEMYLK	22, 34	2	0	0	0	0	0	0	0	0	2	0	0	0	0	0	2	0	0	0
n-Term	A0A498LGK8	Myosin heavy fast skeletal muscle-like protein	subsumed	ERIEAQNTPFDAKTAYFVAEPAEMYLK	n[15]ER[170]IEAQNTPFDAKTAYFVAEPAEMYLK	22, 23	2	0	0	0	0	0	0	0	0	0	0	0	0	0	0	2	0	0	0
n-Term	A0A498LGQ1	Neuronal membrane glyco M6-a	canonical	SKEEQELHDIHSTR	n[15]SKEEQELHDIHSTR	689	0	0	0	0	0	0	0	0	0	0	0	0	0	0	0	0	0	0	1
n-Term	A0A498LGR2	Histone H1-like protein	subsumed	AETAPAAAAPPAK	n[15]AETAPAAAAPPAK	2	0	0	0	0	0	0	0	0	0	0	0	0	0	0	0	0	1	0	0
n-Term	A0A498LGR2	Histone H1-like protein	subsumed	AETAPAAAAPPAKAPK	n[15]AETAPAAAAPPAKAPK	2	0	0	0	0	0	0	0	0	0	0	0	0	0	0	0	0	1	0	0
n-Term	A0A498LGR2	Histone H1-like protein	subsumed	KALSAGGYDVEKNNSR	n[15]K[170]ALSAGGYDVEKNNSR	55	0	0	0	0	0	0	0	0	0	0	0	0	0	0	0	0	1	0	0
n-Term	A0A498LGR2	Histone H1-like protein	subsumed	KPAAAKKPAKSPK	n[15]K[142]PAAAK[142]K[170]PAKS[167]PK	160, 165	0	0	0	0	0	0	0	0	0	0	0	0	0	0	0	3	0	0	0
n-Term	A0A498LGV9	Ras-related ORAB-1-like protein	subsumed	VKLQIWDTAGQER	n[15]VKLQIWDTAGQER	116	0	0	0	0	0	0	0	0	0	0	0	0	0	0	0	0	1	0	0
n-Term	A0A498LGX8	Creatine kinase M-type-like protein	canonical	MKFALEEEYPDLSLHNNHMAK	n[15]MKFALEEEYPDLSLHNNHMAK	20	2	0	0	0	0	0	0	0	0	0	0	0	0	0	0	0	0	0	0
n-Term	A0A498LGX8	Creatine kinase M-type-like protein	canonical	MKFALEEEYPDLSLHNNHMAK	n[15]MK[170]FALEEEYPDLSLHNNHMAK	20	3	0	0	0	0	0	0	0	0	0	0	0	0	0	0	0	0	0	0
n-Term	A0A498LGX8	Creatine kinase M-type-like protein	canonical	NCHNDYKMKFALEEEYPDLSLHNNHMAK	n[15]N[115]C[160]HNDYK[170]MKFALEEEYPDLSLHNNHMAK	13	1	0	0	0	0	0	0	0	0	0	0	0	0	0	0	0	0	0	0
n-Term	A0A498LH09	Ras-related protein Rab-26-like	subsumed	VKLQIWDTAGQER	n[15]VKLQIWDTAGQER	105	0	0	0	0	0	0	0	0	0	0	0	0	0	0	0	0	1	0	0
n-Term	A0A498LHM6	Histone H2B	subsumed	KESYAIYVYK	n[15]KESYAIYVYK	35	0	0	0	0	0	0	0	0	0	0	0	0	0	0	0	0	0	0	1
n-Term	A0A498LHM6	Histone H2B	subsumed	KESYAIYVYK	n[15]K[170]ESYAIYVYK	35	0	1	0	0	0	0	0	0	0	0	0	0	0	0	1	0	0	0	0
n-Term	A0A498LHM6	Histone H2B	subsumed	SRKESYAIYVYK	n[15]SRKESYAIYVYK	33	0	0	0	0	0	0	1	0	0	0	0	0	0	0	0	0	0	0	1
n-Term	A0A498LHM6	Histone H2B	subsumed	VLKQVHPDTGISSK	n[15]VLKQVHPDTGISSK[142]	45, 58	0	0	0	0	0	0	0	0	0	0	0	2	0	0	0	0	0	0	0
n-Term	A0A498LHP7	14-3-3 epsilon	canonical	KEAAENSLVAYK	n[15]KEAAENSLVAYK	142	0	0	0	0	0	0	0	0	0	0	0	0	0	0	0	0	0	0	1
n-Term	A0A498LHT6	ADP ATP translocase 2	canonical	KGADIMYSGTIDCWRK	n[15]K[170]GADIMYSGTIDC[160]WRK	245	0	0	1	0	0	0	0	0	0	0	2	0	0	0	0	0	0	0	0
n-Term	A0A498LHW4	Betaine--homocysteine S-methyltransferase 1	indistinguishable representative	ATGKPVAATLCIGPEGDMHGVTPGECAVR	n[15]ATGK[170]PVAATLC[160]IGPEGDMHGVTPGEC[160]AVR	222	0	0	0	0	0	0	0	0	0	0	0	0	0	0	0	1	0	0	0
n-Term	A0A498LHY0	Myosin heavy fast skeletal muscle-like protein	subsumed	ERIEAQNTPFDAKTAYFVAEPAEMYLK	n[15]ERIEAQNTPFDAK[142]TAYFVAEPAEMYLK	22, 34	2	0	0	0	0	0	0	0	0	2	0	0	0	0	0	2	0	0	0
n-Term	A0A498LHY0	Myosin heavy fast skeletal muscle-like protein	subsumed	ERIEAQNTPFDAKTAYFVAEPAEMYLK	n[15]ER[170]IEAQNTPFDAKTAYFVAEPAEMYLK	22, 23	2	0	0	0	0	0	0	0	0	0	0	0	0	0	0	2	0	0	0
n-Term	A0A498LI09	ATP synthase subunit gamma	canonical	TDEKPLFSIDTVASSENMGIYDDIDADVLR	n[15]TDEK[170]PLFSIDTVASSEN[115]MGIYDDIDADVLR	206	0	0	0	0	0	0	0	0	0	0	0	0	0	0	0	1	0	0	0
n-Term	A0A498LI11	Heat shock cognate 71 kDa	canonical	ARFEELNADLFR	n[15]ARFEELNADLFR	300	0	0	0	0	0	0	0	0	0	0	0	0	0	0	0	1	0	0	0
n-Term	A0A498LI11	Heat shock cognate 71 kDa	canonical	MVQEAEKYKAEDDVQR	n[15]MVQEAEK[170]YKAEDDVQR	518	0	0	1	0	0	0	0	0	0	0	0	0	0	0	0	1	0	0	0
n-Term	A0A498LI24	Histone H4	representative	KTVTAMDVVYALK	n[15]KTVTAMDVVYALK	80	0	0	0	0	0	0	0	0	0	0	0	7	0	0	0	0	0	0	2
n-Term	A0A498LI24	Histone H4	representative	KTVTAMDVVYALKR	n[15]KTVTAMDVVYALKR	80	0	0	0	0	0	0	0	0	0	2	0	0	0	0	0	0	0	0	2
n-Term	A0A498LI24	Histone H4	representative	KTVTAMDVVYALKR	n[15]K[170]TVTAMDVVYALKR	80	0	0	0	4	1	0	2	0	0	8	0	0	0	0	0	0	4	0	1
n-Term	A0A498LI24	Histone H4	representative	KTVTAMDVVYALKR	n[15]K[170]TVTAM[147]DVVYALKR	80	0	0	0	0	0	0	1	0	0	0	0	0	0	0	0	0	0	0	0
n-Term	A0A498LI24	Histone H4	representative	RKTVTAMDVVYALK	n[15]RKTVTAMDVVYALK	79	0	0	0	0	0	0	0	0	0	0	0	0	0	0	0	0	0	0	1
n-Term	A0A498LI49	Tudor domain-containing 6-like isoform X1	canonical	RDFMDQGPQSCESYGAQQGNAESK	n[15]RDFMDQGPQSC[160]ESYGAQQGNAESK	1127	0	0	0	0	0	0	0	0	0	0	0	0	0	1	0	0	0	0	0
n-Term	A0A498LI49	Tudor domain-containing 6-like isoform X1	canonical	RPCPSDKTDAVKPK	n[15]RPC[160]PSDKTDAVKPK	1194	0	0	0	0	0	0	0	0	0	0	0	0	0	1	0	0	0	0	0
n-Term	A0A498LIF3	Vimentin	subsumed	DSMLELKPVVENTFTKK	n[15]DSMLELK[170]PVVENTFTKK	418	0	0	0	0	0	0	1	0	0	0	0	0	0	0	0	0	0	0	0
n-Term	A0A498LIF3	Vimentin	subsumed	KLLEGEESR	n[15]KLLEGEESR	395	0	0	0	0	0	0	0	0	0	0	0	0	0	0	0	0	0	0	1
n-Term	A0A498LIF3	Vimentin	subsumed	KVDSLQDELAFLK	n[15]K[170]VDSLQDELAFLK	216	0	0	0	0	0	0	0	0	0	0	0	1	0	0	0	0	0	0	0
n-Term	A0A498LIL1	Myosin light polypeptide 6-like isoform X2	canonical	VFDKEGNGTVMGAELR	n[15]VFDK[170]EGN[115]GTVMGAELR	89	1	0	0	0	0	0	0	0	0	0	0	0	0	0	0	0	0	0	0
n-Term	A0A498LIP3	EH domain-containing 1-like protein	canonical	FICAQMPNPVLDSISIIDTPGILSGEK	n[15]FIC[160]AQMPNPVLDSISIIDTPGILSGEK	135	0	0	0	1	0	0	0	0	0	0	0	0	0	0	0	0	0	0	0
n-Term	A0A498LIR9	Myosin heavy fast skeletal muscle-like protein	representative	ERIEAQNTPFDAKTAYFVAEPAEMYLK	n[15]ERIEAQNTPFDAK[142]TAYFVAEPAEMYLK	22, 34	2	0	0	0	0	0	0	0	0	2	0	0	0	0	0	2	0	0	0
n-Term	A0A498LIR9	Myosin heavy fast skeletal muscle-like protein	representative	ERIEAQNTPFDAKTAYFVAEPAEMYLK	n[15]ER[170]IEAQNTPFDAKTAYFVAEPAEMYLK	22, 23	2	0	0	0	0	0	0	0	0	0	0	0	0	0	0	2	0	0	0
n-Term	A0A498LIR9	Myosin heavy fast skeletal muscle-like protein	representative	RVEAPPHIFSISDNAYQFMLTDR	n[15]RVEAPPHIFSISDNAYQFMLTDR	147	1	0	0	0	0	0	0	0	0	0	0	0	0	0	0	0	0	0	0
n-Term	A0A498LIW5	Alpha cardiac	representative	AVFPSIVGRPRHQGVMVGMGQKDSYVGDEAQSK	n[15]AVFPSIVGRPRHQGVM[147]VGMGQKDSYVGDEAQSK	31	0	0	0	0	0	0	0	1	0	0	0	0	0	0	0	0	0	0	0
n-Term	A0A498LIW5	Alpha cardiac	representative	CDIDIRKDLYANNVLSGGTTMYPGIADR	n[15]C[143]DIDIR[170]KDLYAN[115]NVLSGGTTMYPGIADR	287, 292	2	0	0	0	0	0	0	0	0	0	0	0	0	0	0	0	0	0	0
n-Term	A0A498LIW5	Alpha cardiac	representative	CDIDIRKDLYANNVLSGGTTMYPGIADR	n[15]C[143]DIDIR[170]KDLYAN[115]N[115]VLSGGTTMYPGIADR	287, 292	0	0	0	2	0	0	0	0	0	0	0	0	0	0	0	0	0	0	0
n-Term	A0A498LIW5	Alpha cardiac	representative	CDIDIRKDLYANNVLSGGTTMYPGIADR	n[15]C[160]DIDIRKDLYANNVLSGGTTMYPGIADR	287	8	0	2	9	2	0	1	1	0	0	0	0	0	0	0	0	0	1	0
n-Term	A0A498LIW5	Alpha cardiac	representative	CDIDIRKDLYANNVLSGGTTMYPGIADR	n[15]C[160]DIDIRKDLYANNVLSGGTTM[147]YPGIADR	287	1	0	1	1	0	0	0	3	0	0	0	0	0	0	0	0	0	0	0
n-Term	A0A498LIW5	Alpha cardiac	representative	CDIDIRKDLYANNVLSGGTTMYPGIADR	n[15]C[160]DIDIRKDLYANN[115]VLSGGTTMYPGIADR	287	1	0	0	0	0	0	0	0	0	0	0	0	0	0	0	0	0	0	0
n-Term	A0A498LIW5	Alpha cardiac	representative	CDIDIRKDLYANNVLSGGTTMYPGIADR	n[15]C[160]DIDIRKDLYAN[115]NVLSGGTTMYPGIADR	287	3	0	0	2	1	0	0	1	0	0	0	0	0	0	0	0	0	0	0
n-Term	A0A498LIW5	Alpha cardiac	representative	CDIDIRKDLYANNVLSGGTTMYPGIADR	n[15]C[160]DIDIRKDLYAN[115]N[115]VLSGGTTMYPGIADR	287	0	0	0	1	0	0	0	0	0	0	0	0	0	0	0	0	0	0	0
n-Term	A0A498LIW5	Alpha cardiac	representative	CDIDIRKDLYANNVLSGGTTMYPGIADR	n[15]C[160]DIDIR[170]KDLYAN[115]N[115]VLSGGTTMYPGIADR	287, 292	0	0	0	0	0	0	0	2	0	0	0	0	0	0	0	0	0	0	0
n-Term	A0A498LIW5	Alpha cardiac	representative	DSYVGDEAQSKR	n[15]DSYVGDEAQSKR	53	0	0	0	0	0	0	0	1	0	0	0	0	0	0	0	0	0	0	0
n-Term	A0A498LIW5	Alpha cardiac	representative	EKLCYVALDFENEMATAASSSSLEK	n[15]EKLC[160]YVALDFENEMATAASSSSLEK	216	3	0	0	4	1	0	0	0	0	0	0	0	0	0	0	0	0	0	0
n-Term	A0A498LIW5	Alpha cardiac	representative	EKLCYVALDFENEMATAASSSSLEK	n[15]EK[170]LC[160]YVALDFENEMATAASSSSLEK	216	0	0	0	2	1	0	0	2	0	0	0	0	0	0	0	0	0	0	0
n-Term	A0A498LIW5	Alpha cardiac	representative	EKLCYVALDFENEMATAASSSSLEK	n[15]EK[170]LC[160]YVALDFEN[115]EMATAASSSSLEK	216	6	0	0	2	0	0	0	1	0	0	0	0	0	0	0	0	0	0	0
n-Term	A0A498LIW5	Alpha cardiac	representative	FRCPETLFQPSFIGMESAGIHETAYNSIMK	n[15]FRC[160]PETLFQPSFIGMESAGIHETAYNSIMK	257	40	0	1	1	11	0	0	1	0	3	1	1	0	0	0	0	1	0	0
n-Term	A0A498LIW5	Alpha cardiac	representative	FRCPETLFQPSFIGMESAGIHETAYNSIMK	n[15]FRC[160]PETLFQPSFIGMESAGIHETAYNSIM[147]K	257	0	0	0	0	1	0	0	0	0	0	0	0	0	0	0	0	1	0	0
n-Term	A0A498LIW5	Alpha cardiac	representative	FRCPETLFQPSFIGMESAGIHETAYNSIMK	n[15]FRC[160]PETLFQPSFIGMESAGIHETAYNSIM[147]K[170]	257	0	0	0	0	1	0	0	0	0	0	0	0	0	0	0	0	0	0	0
n-Term	A0A498LIW5	Alpha cardiac	representative	FRCPETLFQPSFIGMESAGIHETAYNSIMK	n[15]FRC[160]PETLFQPSFIGMESAGIHETAYN[115]SIMK	257	21	0	2	0	9	0	0	0	0	1	0	0	0	0	0	0	0	0	0
n-Term	A0A498LIW5	Alpha cardiac	representative	FRCPETLFQPSFIGMESAGIHETAYNSIMK	n[15]FRC[160]PETLFQPSFIGM[147]ESAGIHETAYNSIMK	257	0	0	0	0	0	0	0	0	0	1	0	0	0	0	0	0	0	0	0
n-Term	A0A498LIW5	Alpha cardiac	representative	FRCPETLFQPSFIGMESAGIHETAYNSIMK	n[15]FRC[160]PETLFQPSFIGM[147]ESAGIHETAYNSIMK[170]	257	0	0	0	0	1	0	0	0	0	0	0	0	0	0	0	0	0	0	0
n-Term	A0A498LIW5	Alpha cardiac	representative	FRCPETLFQPSFIGMESAGIHETAYNSIMK	n[15]FRC[160]PETLFQPSFIGM[147]ESAGIHETAYNSIM[147]K[170]	257	1	0	0	0	0	0	0	0	0	0	0	0	0	0	0	0	0	0	0
n-Term	A0A498LIW5	Alpha cardiac	representative	FRCPETLFQPSFIGMESAGIHETAYNSIMK	n[15]FRC[160]PETLFQPSFIGM[147]ESAGIHETAYN[115]SIMK	257	0	0	0	0	1	0	0	0	0	0	0	0	0	0	0	0	0	0	0
n-Term	A0A498LIW5	Alpha cardiac	representative	FRCPETLFQPSFIGMESAGIHETAYNSIMK	n[15]FRC[160]PETLFQPSFIGM[147]ESAGIHETAYN[115]SIMK[142]	257, 286	0	0	0	2	0	0	0	0	0	0	0	0	0	0	0	0	0	0	0
n-Term	A0A498LIW5	Alpha cardiac	representative	FRCPETLFQPSFIGMESAGIHETAYNSIMK	n[15]FRC[160]PETLFQPSFIGM[147]ESAGIHETAYN[115]SIMK[170]	257	0	0	0	0	1	0	0	0	0	0	0	0	0	0	0	0	0	0	0
n-Term	A0A498LIW5	Alpha cardiac	representative	HQGVMVGMGQKDSYVGDEAQSK	n[15]HQGVMVGMGQK[170]DSYVGDEAQSK	42	1	0	0	1	2	0	0	5	0	0	0	0	0	0	0	0	0	0	0
n-Term	A0A498LIW5	Alpha cardiac	representative	HQGVMVGMGQKDSYVGDEAQSK	n[15]HQGVMVGM[147]GQK[170]DSYVGDEAQSK	42	0	0	0	0	0	0	0	3	0	0	0	0	0	0	0	0	0	0	0
n-Term	A0A498LIW5	Alpha cardiac	representative	HQGVMVGMGQKDSYVGDEAQSK	n[15]HQGVM[147]VGMGQK[170]DSYVGDEAQSK	42	1	0	0	0	1	0	0	5	0	0	0	0	0	0	0	0	0	0	0
n-Term	A0A498LIW5	Alpha cardiac	representative	HQGVMVGMGQKDSYVGDEAQSK	n[15]HQGVM[147]VGM[147]GQKDSYVGDEAQSK	42	4	0	2	0	1	0	0	1	0	0	2	0	0	0	0	0	0	0	0
n-Term	A0A498LIW5	Alpha cardiac	representative	HQGVMVGMGQKDSYVGDEAQSKR	n[15]HQGVMVGMGQKDSYVGDEAQSKR	42	0	0	0	0	0	0	0	0	0	0	0	0	0	0	0	0	0	0	1
n-Term	A0A498LIW5	Alpha cardiac	representative	HQGVMVGMGQKDSYVGDEAQSKR	n[15]HQGVMVGMGQK[170]DSYVGDEAQSKR	42	12	0	8	17	12	0	9	15	0	11	4	0	0	0	0	2	3	2	4
n-Term	A0A498LIW5	Alpha cardiac	representative	HQGVMVGMGQKDSYVGDEAQSKR	n[15]HQGVMVGM[147]GQK[170]DSYVGDEAQSKR	42	2	0	1	0	0	0	0	3	0	0	0	0	0	0	0	1	0	0	0
n-Term	A0A498LIW5	Alpha cardiac	representative	HQGVMVGMGQKDSYVGDEAQSKR	n[15]HQGVM[147]VGMGQK[170]DSYVGDEAQSKR	42	2	0	2	1	1	0	2	4	0	5	0	0	0	0	0	0	0	1	1
n-Term	A0A498LIW5	Alpha cardiac	representative	KDLYANNVLSGGTTMYPGIADR	n[15]KDLYANNVLSGGTTMYPGIADR	293	1	0	0	0	1	0	0	1	0	0	0	1	0	0	0	0	0	0	0
n-Term	A0A498LIW5	Alpha cardiac	representative	KDLYANNVLSGGTTMYPGIADR	n[15]KDLYANNVLSGGTTM[147]YPGIADR	293	0	0	0	0	1	0	0	0	0	0	0	0	0	0	0	0	0	0	0
n-Term	A0A498LIW5	Alpha cardiac	representative	KDLYANNVLSGGTTMYPGIADR	n[15]KDLYAN[115]NVLSGGTTMYPGIADR	293	1	0	0	1	0	0	0	0	0	0	0	0	0	0	0	0	0	0	0
n-Term	A0A498LIW5	Alpha cardiac	representative	KDLYANNVLSGGTTMYPGIADR	n[15]KDLYAN[115]NVLSGGTTM[147]YPGIADR	293	0	1	0	0	0	0	0	0	0	0	0	0	0	0	0	0	0	0	0
n-Term	A0A498LIW5	Alpha cardiac	representative	KDLYANNVLSGGTTMYPGIADR	n[15]KDLYAN[115]N[115]VLSGGTTMYPGIADR	293	0	0	0	0	1	0	0	0	0	0	0	0	0	0	0	0	0	0	0
n-Term	A0A498LIW5	Alpha cardiac	representative	LCYVALDFENEMATAASSSSLEK	n[15]LC[160]YVALDFENEMATAASSSSLEK	218	16	0	0	0	0	0	0	0	0	0	0	0	0	0	0	0	0	0	0
n-Term	A0A498LIW5	Alpha cardiac	representative	MCDDDETTALVCDNGSGLVK	n[15]MC[160]DDDETTALVC[160]DNGSGLVK	1	0	0	0	0	0	0	0	0	0	0	0	0	0	0	0	0	1	0	0
n-Term	A0A498LIW5	Alpha cardiac	representative	MQKEITALAPSTMK	n[15]MQKEITALAPSTMK	315	0	0	0	0	0	0	0	1	0	0	0	0	0	0	0	0	1	0	0
n-Term	A0A498LIW5	Alpha cardiac	representative	MQKEITALAPSTMK	n[15]MQK[170]EITALAPSTMK	315	1	0	0	0	2	0	0	0	0	1	0	0	0	0	0	0	0	0	0
n-Term	A0A498LIW5	Alpha cardiac	representative	MQKEITALAPSTMK	n[15]MQK[170]EITALAPSTM[147]K	315	1	0	0	2	1	0	0	0	0	0	0	0	0	0	0	0	0	0	0
n-Term	A0A498LIW5	Alpha cardiac	representative	RGILTLKYPIEHGIITNWDDMEK	n[15]RGILTLKYPIEHGIITNWDDMEK	64	0	0	0	0	0	0	0	4	0	0	0	0	0	0	0	0	0	0	0
n-Term	A0A498LIW5	Alpha cardiac	representative	YPIEHGIITNWDDMEKIWHHTFYNELR	n[15]YPIEHGIITNWDDMEKIWHHTFYNELR	71	9	0	2	0	0	0	7	4	0	28	4	1	0	0	0	0	6	0	0
n-Term	A0A498LIW5	Alpha cardiac	representative	YPIEHGIITNWDDMEKIWHHTFYNELR	n[15]YPIEHGIITNWDDMEK[170]IWHHTFYNELR	71	0	0	0	0	1	0	0	0	0	14	0	0	0	0	0	0	0	0	0
n-Term	A0A498LIW5	Alpha cardiac	representative	YPIEHGIITNWDDMEKIWHHTFYNELR	n[15]YPIEHGIITNWDDMEK[170]IWHHTFYN[115]ELR	71	0	0	0	0	0	0	0	0	0	1	0	0	0	0	0	0	0	0	0
n-Term	A0A498LIW5	Alpha cardiac	representative	YPIEHGIITNWDDMEKIWHHTFYNELR	n[15]YPIEHGIITNWDDM[147]EKIWHHTFYNELR	71	20	0	0	0	0	0	0	0	0	4	0	0	0	0	0	0	0	0	0
n-Term	A0A498LIW5	Alpha cardiac	representative	YPIEHGIITNWDDMEKIWHHTFYNELR	n[15]YPIEHGIITNW[202]DDMEKIWHHTFYNELR	71	2	0	0	0	0	0	0	0	0	4	0	0	0	0	0	0	0	0	0
n-Term	A0A498LIW5	Alpha cardiac	representative	YPIEHGIITNWDDMEKIWHHTFYNELR	n[15]YPIEHGIITNW[202]DDMEK[170]IWHHTFYNELR	71	0	0	0	0	0	0	0	0	0	1	0	0	0	0	0	0	0	0	0
n-Term	A0A498LIW5	Alpha cardiac	representative	YPIEHGIITNWDDMEKIWHHTFYNELR	n[15]YPIEHGIITN[115]WDDMEKIWHHTFYNELR	71	3	0	1	0	0	0	1	6	0	1	2	0	0	0	0	0	2	0	0
n-Term	A0A498LIW5	Alpha cardiac	representative	YPIEHGIITNWDDMEKIWHHTFYNELR	n[15]YPIEHGIITN[115]WDDMEK[170]IWHHTFYNELR	71	0	0	0	0	0	0	0	0	0	3	0	0	0	0	0	0	0	0	0
n-Term	A0A498LIW5	Alpha cardiac	representative	YPIEHGIITNWDDMEKIWHHTFYNELR	n[15]YPIEHGIITN[115]WDDM[147]EKIWHHTFYNELR	71	3	0	0	0	0	0	0	0	0	0	0	0	0	0	0	0	0	0	0
n-Term	A0A498LIY8	ADP ATP translocase 2	representative	KGADIMYSGTIDCWRK	n[15]K[170]GADIMYSGTIDC[160]WRK	245	0	0	1	0	0	0	0	0	0	0	2	0	0	0	0	0	0	0	0
n-Term	A0A498LJ11	Guanylate cyclase soluble subunit beta-1	canonical	KIIGDELVQSYSYEGCEAKR	n[15]K[170]IIGDELVQSYSYEGC[160]EAKR	1277	0	0	0	2	0	0	0	0	0	0	0	0	0	0	0	0	0	0	0
n-Term	A0A498LJ34	SH3 domain-binding glutamic acid-rich-like protein	canonical	QQQDVMGFLAANKIEFEECDIAADEDNRK	n[15]QQQDVMGFLAAN[115]K[170]IEFEEC[160]DIAADEDNRK	19	0	0	0	1	0	0	0	0	0	0	0	0	0	0	0	0	0	0	0
n-Term	A0A498LJ34	SH3 domain-binding glutamic acid-rich-like protein	canonical	QQQDVMGFLAANKIEFEECDIAADEDNRK	n[15]QQ[111]QDVM[147]GFLAANK[170]IEFEEC[160]DIAADEDNRK	19	0	0	0	0	0	0	0	0	0	1	0	0	0	0	0	0	0	0	0
n-Term	A0A498LJ34	SH3 domain-binding glutamic acid-rich-like protein	canonical	QQQDVMGFLAANKIEFEECDIAADEDNRK	n[15]Q[111]QQDVMGFLAAN[115]K[170]IEFEEC[160]DIAADEDNRK	19	0	0	0	0	0	0	0	1	0	0	0	0	0	0	0	0	0	0	0
n-Term	A0A498LJB6	Beta-enolase	canonical	AKYGKDATNVGDEGGFAPNILENNEALELLK	n[15]AK[170]YGKDATN[115]VGDEGGFAPNILENNEALELLK	295	2	0	0	0	0	0	0	0	0	0	0	0	0	0	0	1	0	0	0
n-Term	A0A498LJB6	Beta-enolase	canonical	AKYGKDATNVGDEGGFAPNILENNEALELLK	n[15]AK[170]YGKDATN[115]VGDEGGFAPN[115]ILENNEALELLK	295	0	0	0	0	0	0	0	0	0	0	0	0	0	0	0	1	0	0	0
n-Term	A0A498LJB6	Beta-enolase	canonical	FGANAILGVSLAVCK	n[15]FGANAILGVSLAVC[160]K	203	1	0	0	0	0	0	0	0	0	0	0	0	0	0	0	0	0	0	0
n-Term	A0A498LJB6	Beta-enolase	canonical	HIADLAGNKDVILPVPAFNVINGGSHAGNK	n[15]HIADLAGN[115]K[170]DVILPVPAFNVINGGSHAGNK	230	2	0	0	0	1	0	0	0	0	0	0	0	0	0	0	0	0	0	0
n-Term	A0A498LJB6	Beta-enolase	canonical	HIADLAGNKDVILPVPAFNVINGGSHAGNK	n[15]HIADLAGN[115]K[170]DVILPVPAFNVIN[115]GGSHAGNK	230	8	0	0	0	4	0	0	0	0	0	0	0	0	0	1	9	0	0	0
n-Term	A0A498LJB6	Beta-enolase	canonical	HIADLAGNKDVILPVPAFNVINGGSHAGNK	n[15]HIADLAGN[115]K[170]DVILPVPAFN[115]VIN[115]GGSHAGNK	230	0	0	0	0	2	0	0	1	0	0	0	0	0	0	0	1	0	0	0
n-Term	A0A498LJB6	Beta-enolase	canonical	IDKFMLELDGTENKSK	n[15]IDK[170]FMLELDGTENKSK	187	2	0	0	0	0	0	0	0	0	0	0	0	0	0	0	0	0	0	0
n-Term	A0A498LJB6	Beta-enolase	canonical	KACNCLLLK	n[15]KAC[160]NC[160]LLLK	386	3	0	0	0	0	0	0	0	0	0	0	0	0	0	0	0	0	0	0
n-Term	A0A498LJK1	Glutathione S-transferase Mu 3-like protein	subsumed	KHNLCGETEEEQTR	n[15]KHNLC[160]GETEEEQTR	83	0	0	0	0	0	0	1	0	0	4	0	0	0	1	0	0	0	0	0
n-Term	A0A498LJK1	Glutathione S-transferase Mu 3-like protein	subsumed	KHNLCGETEEEQTRVDILENQAMDFR	n[15]KHNLC[160]GETEEEQTRVDILENQAMDFR	83	0	0	0	1	0	0	0	0	0	0	0	0	0	5	0	0	0	0	1
n-Term	A0A498LJK1	Glutathione S-transferase Mu 3-like protein	subsumed	KHNLCGETEEEQTRVDILENQAMDFR	n[15]KHNLC[160]GETEEEQTRVDILEN[115]QAMDFR	83	0	0	0	0	0	0	0	0	0	0	0	0	0	1	0	0	0	0	0
n-Term	A0A498LJL1	Histone H2B	marginally distinguished	KESYAIYVYK	n[15]KESYAIYVYK	33	0	0	0	0	0	0	0	0	0	0	0	0	0	0	0	0	0	0	1
n-Term	A0A498LJL1	Histone H2B	marginally distinguished	KESYAIYVYK	n[15]K[170]ESYAIYVYK	33	0	1	0	0	0	0	0	0	0	0	0	0	0	0	1	0	0	0	0
n-Term	A0A498LJL1	Histone H2B	marginally distinguished	VLKQVHPDTGISSK	n[15]VLKQVHPDTGISSK[142]	43, 56	0	0	0	0	0	0	0	0	0	0	0	2	0	0	0	0	0	0	0
n-Term	A0A498LJU3	60S ribosomal L7	canonical	KVGNYYVPAEPK	n[15]K[170]VGN[115]YYVPAEPK	75	0	0	0	0	0	0	0	0	0	0	0	0	0	0	0	1	0	0	0
n-Term	A0A498LK06	Histone H2B	subsumed	KESYAIYVYK	n[15]KESYAIYVYK	33	0	0	0	0	0	0	0	0	0	0	0	0	0	0	0	0	0	0	1
n-Term	A0A498LK06	Histone H2B	subsumed	KESYAIYVYK	n[15]K[170]ESYAIYVYK	33	0	1	0	0	0	0	0	0	0	0	0	0	0	0	1	0	0	0	0
n-Term	A0A498LK06	Histone H2B	subsumed	SRKESYAIYVYK	n[15]SRKESYAIYVYK	31	0	0	0	0	0	0	1	0	0	0	0	0	0	0	0	0	0	0	1
n-Term	A0A498LK06	Histone H2B	subsumed	VLKQVHPDTGISSK	n[15]VLKQVHPDTGISSK[142]	43, 56	0	0	0	0	0	0	0	0	0	0	0	2	0	0	0	0	0	0	0
n-Term	A0A498LK15	T-complex 1 subunit epsilon	canonical	QVKENGANLAICQWGFDDEANHLLLQNELPAVR	n[15]Q[111]VKENGANLAIC[160]QWGFDDEAN[115]HLLLQNELPAVR	291	0	0	0	0	0	0	0	0	0	0	0	0	0	0	0	0	0	1	0
n-Term	A0A498LKI5	Leukocyte cell-derived chemotaxin-2-like protein	indistinguishable representative	GKHEGLDIVCADGATVFAPFDVK	n[15]GKHEGLDIVC[160]ADGATVFAPFDVK	59	0	0	0	0	0	0	0	0	0	0	0	0	0	0	0	0	0	0	4
n-Term	A0A498LKI5	Leukocyte cell-derived chemotaxin-2-like protein	indistinguishable representative	NNGKGKHEGLDIVCADGATVFAPFDVK	n[15]N[115]NGKGKHEGLDIVC[160]ADGATVFAPFDVK	55	0	0	0	0	0	0	0	0	0	0	0	0	0	0	0	0	0	0	1
n-Term	A0A498LKK6	Myosin heavy fast skeletal muscle-like protein	subsumed	ERIEAQNTPFDAKTAYFVAEPAEMYLK	n[15]ERIEAQNTPFDAK[142]TAYFVAEPAEMYLK	22, 34	2	0	0	0	0	0	0	0	0	2	0	0	0	0	0	2	0	0	0
n-Term	A0A498LKK6	Myosin heavy fast skeletal muscle-like protein	subsumed	ERIEAQNTPFDAKTAYFVAEPAEMYLK	n[15]ER[170]IEAQNTPFDAKTAYFVAEPAEMYLK	22, 23	2	0	0	0	0	0	0	0	0	0	0	0	0	0	0	2	0	0	0
n-Term	A0A498LKK6	Myosin heavy fast skeletal muscle-like protein	subsumed	RIEAPPHIFSISDNAYQFMLTDR	n[15]RIEAPPHIFSISDNAYQFMLTDR	147	1	0	0	0	0	0	0	0	0	0	0	0	0	0	0	0	0	0	0
n-Term	A0A498LKP6	ES1 mitochondrial	canonical	DCKLNNDVER	n[15]DC[160]KLNNDVER	123	0	0	1	0	0	0	0	0	0	0	0	0	0	0	0	0	0	0	0
n-Term	A0A498LKP6	ES1 mitochondrial	canonical	FSHGQGMMQMNDLSKLDVNSFDAVIFPGGHGIVK	n[15]FSHGQGMMQMN[115]DLSK[170]LDVNSFDAVIFPGGHGIVK	79	0	0	2	0	0	0	0	0	0	0	0	0	0	0	0	0	0	0	0
n-Term	A0A498LKP6	ES1 mitochondrial	canonical	FSHGQGMMQMNDLSKLDVNSFDAVIFPGGHGIVK	n[15]FSHGQGMMQM[147]NDLSK[170]LDVNSFDAVIFPGGHGIVK	79	0	0	1	0	0	0	0	0	0	0	0	0	0	0	0	0	0	0	0
n-Term	A0A498LKP6	ES1 mitochondrial	canonical	NGARFQIFAPNQQQMHVMDHMR	n[15]N[115]GARFQIFAPNQQQMHVMDHMR	40	0	0	2	0	0	0	0	0	0	0	0	0	0	0	0	0	0	0	0
n-Term	A0A498LLB3	Ras-related Rab-3B-like protein	canonical	VKLQIWDTAGQER	n[15]VKLQIWDTAGQER	70	0	0	0	0	0	0	0	0	0	0	0	0	0	0	0	0	1	0	0
n-Term	A0A498LLC0	Adenosylhomocysteinase	subsumed	HFENMKDDAIVCNIGHFDCEIDMK	n[15]HFEN[115]MK[170]DDAIVC[160]NIGHFDC[160]EIDMK	561	0	0	0	0	0	0	0	0	0	0	0	0	0	0	0	2	0	0	0
n-Term	A0A498LLC5	Gelsolin-like protein	indistinguishable representative	ANIHMVEDGSEPEAVLAALGQKPSIPAGSPDDEKTDR	n[15]ANIHMVEDGSEPEAVLAALGQKPSIPAGSPDDEKTDR	331	0	0	2	0	0	0	0	0	0	0	0	0	0	0	0	0	0	0	0
n-Term	A0A498LLC5	Gelsolin-like protein	indistinguishable representative	ANIHMVEDGSEPEAVLAALGQKPSIPAGSPDDEKTDR	n[15]ANIHMVEDGSEPEAVLAALGQK[170]PSIPAGSPDDEKTDR	331	0	0	5	0	0	0	0	0	0	1	0	0	0	0	0	2	0	0	0
n-Term	A0A498LLC5	Gelsolin-like protein	indistinguishable representative	GKPMIIHLGGTSR	n[15]GKPMIIHLGGTSR	616	0	0	1	0	0	0	0	0	0	0	0	0	0	0	0	0	0	0	0
n-Term	A0A498LLC5	Gelsolin-like protein	indistinguishable representative	HVCSFLGGSATEISEGKEPAGFWSALGGKK	n[15]HVC[160]SFLGGSATEISEGKEPAGFWSALGGKK	695	0	0	1	0	0	0	0	0	0	0	0	0	0	0	0	0	0	0	0
n-Term	A0A498LLC5	Gelsolin-like protein	indistinguishable representative	IAKVSKVPFDASSLHSNK	n[15]IAK[170]VSKVPFDASSLHSNK	489	0	0	1	0	0	0	0	0	0	0	0	0	0	0	0	0	0	0	0
n-Term	A0A498LLC5	Gelsolin-like protein	indistinguishable representative	QFFSDWKDKDQTTGPGQAYAIGR	n[15]QFFSDWKDKDQTTGPGQAYAIGR	466	0	0	1	0	0	0	0	0	0	0	0	0	0	0	0	0	0	0	0
n-Term	A0A498LLC5	Gelsolin-like protein	indistinguishable representative	QFFSDWKDKDQTTGPGQAYAIGR	n[15]QFFSDWK[170]DKDQTTGPGQAYAIGR	466	0	0	1	0	0	0	0	0	0	0	0	0	0	0	0	0	0	0	0
n-Term	A0A498LLC5	Gelsolin-like protein	indistinguishable representative	QFFSDWKDKDQTTGPGQAYAIGR	n[15]QFFSDW[202]K[142]DK[170]DQTTGPGQAYAIGR	466, 472	0	0	2	0	0	0	0	0	0	0	0	0	0	0	0	0	0	0	0
n-Term	A0A498LLC5	Gelsolin-like protein	indistinguishable representative	QFFSDWKDKDQTTGPGQAYAIGR	n[15]Q[111]FFSDWKDKDQTTGPGQAYAIGR	466	0	0	1	0	0	0	0	0	0	0	0	0	0	0	0	0	0	0	0
n-Term	A0A498LLC5	Gelsolin-like protein	indistinguishable representative	QQMLSPNECYILDNGVDSK	n[15]QQMLSPNEC[160]YILDNGVDSK	398	0	0	1	0	0	0	0	0	0	0	0	0	0	0	0	0	0	0	0
n-Term	A0A498LLC5	Gelsolin-like protein	indistinguishable representative	TSLVAQSSPFKQQMLSPNECYILDNGVDSK	n[15]TSLVAQSSPFK[170]QQMLSPN[115]EC[160]YILDNGVDSK	387	0	0	1	0	0	0	0	0	0	0	0	0	0	0	0	0	0	0	0
n-Term	A0A498LLC5	Gelsolin-like protein	indistinguishable representative	VSKVPFDASSLHSNK	n[15]VSK[170]VPFDASSLHSNK	492	0	0	8	0	0	0	0	0	0	0	0	0	0	0	0	0	0	0	0
n-Term	A0A498LLD3	Alanine--glyoxylate aminotransferase mitochondrial	canonical	EKGGICIADEVQTGFGR	n[15]EKGGIC[160]IADEVQTGFGR	342	0	0	0	0	0	0	0	0	0	0	0	0	0	0	0	0	0	0	1
n-Term	A0A498LLG8	Adhesion G-coupled receptor L4-like protein	canonical	VSAACQPESKPSIYSK	n[15]VSAAC[160]QPESKPSIYSK	1366	0	0	0	0	0	0	0	0	0	0	0	0	0	0	0	0	0	4	0
n-Term	A0A498LLG8	Adhesion G-coupled receptor L4-like protein	canonical	WGAECQTYDVSMR	n[15]WGAEC[160]QTYDVSMR	1353	0	0	0	0	0	0	0	0	0	0	0	0	0	0	0	0	2	3	0
n-Term	A0A498LLJ4	Fructose-bisphosphate aldolase (EC 4.1.2.13)	canonical	ALQASALAAWK	n[15]ALQASALAAWK	305	0	0	0	0	0	0	0	0	0	0	0	0	0	0	0	1	0	0	0
n-Term	A0A498LLJ4	Fructose-bisphosphate aldolase (EC 4.1.2.13)	canonical	ALSDHHVYLEGTLLKPNMVTAGHSCTK	n[15]ALSDHHVYLEGTLLKPNMVTAGHSC[160]TK	216	0	0	0	0	0	0	0	0	0	0	0	0	0	0	0	1	0	0	0
n-Term	A0A498LLJ4	Fructose-bisphosphate aldolase (EC 4.1.2.13)	canonical	ALSDHHVYLEGTLLKPNMVTAGHSCTK	n[15]ALSDHHVYLEGTLLK[170]PN[115]MVTAGHSC[160]TK	216	0	0	0	0	0	0	0	0	0	0	0	0	0	0	0	1	0	0	0
n-Term	A0A498LLJ4	Fructose-bisphosphate aldolase (EC 4.1.2.13)	canonical	FQKINVENIEENRR	n[15]FQK[170]IN[115]VENIEENRR	44	0	0	0	0	0	0	0	0	0	0	0	0	0	0	0	1	0	0	0
n-Term	A0A498LLJ4	Fructose-bisphosphate aldolase (EC 4.1.2.13)	canonical	IVATGKGILAADESTGTMAK	n[15]IVATGK[170]GILAADESTGTMAK	23	0	0	0	0	0	0	0	0	0	0	0	0	0	0	0	3	0	0	0
n-Term	A0A498LLJ4	Fructose-bisphosphate aldolase (EC 4.1.2.13)	canonical	KAAQDAFMTR	n[15]KAAQDAFMTR	322	0	0	0	0	0	0	0	0	0	0	0	0	0	0	0	1	0	0	0
n-Term	A0A498LLJ4	Fructose-bisphosphate aldolase (EC 4.1.2.13)	canonical	VDKGTAGLAGTDGETTTQGLDGLSER	n[15]VDKGTAGLAGTDGETTTQGLDGLSER	109	0	0	0	0	0	0	0	0	0	0	0	0	0	0	0	4	0	0	0
n-Term	A0A498LLJ4	Fructose-bisphosphate aldolase (EC 4.1.2.13)	canonical	VDKGTAGLAGTDGETTTQGLDGLSER	n[15]VDK[170]GTAGLAGTDGETTTQGLDGLSER	109	0	0	0	0	0	0	0	0	0	0	0	0	0	0	0	1	0	0	0
n-Term	A0A498LLU9	Amine sulfotransferase-like protein	marginally distinguished	ERIEAQNTPFDAKTAYFVAEPAEMYLK	n[15]ERIEAQNTPFDAK[142]TAYFVAEPAEMYLK	22, 34	2	0	0	0	0	0	0	0	0	2	0	0	0	0	0	2	0	0	0
n-Term	A0A498LLU9	Amine sulfotransferase-like protein	marginally distinguished	ERIEAQNTPFDAKTAYFVAEPAEMYLK	n[15]ER[170]IEAQNTPFDAKTAYFVAEPAEMYLK	22, 23	2	0	0	0	0	0	0	0	0	0	0	0	0	0	0	2	0	0	0
n-Term	A0A498LLU9	Amine sulfotransferase-like protein	marginally distinguished	RIEAPPHIFSISDNAYQFMLTDR	n[15]RIEAPPHIFSISDNAYQFMLTDR	131	1	0	0	0	0	0	0	0	0	0	0	0	0	0	0	0	0	0	0
n-Term	A0A498LLW9	Tubulin beta chain	canonical	KLAVNMVPFPR	n[15]KLAVNMVPFPR	240	0	0	0	0	0	0	0	0	0	0	0	0	0	0	0	0	0	0	1
n-Term	A0A498LM50	Peroxiredoxin-1-like protein	canonical	KIGCEVIAASTDSHFSHLAWVNTPR	n[15]KIGC[160]EVIAASTDSHFSHLAWVNTPR	67	0	0	0	3	0	0	0	0	0	3	0	0	0	1	0	0	2	0	1
n-Term	A0A498LM50	Peroxiredoxin-1-like protein	canonical	KIGCEVIAASTDSHFSHLAWVNTPR	n[15]KIGC[160]EVIAASTDSHFSHLAWVN[115]TPR	67	0	0	0	1	0	0	0	0	0	0	0	0	0	0	0	0	0	0	0
n-Term	A0A498LM50	Peroxiredoxin-1-like protein	canonical	KQGGLGSMNIPLVADLTQSISR	n[15]KQGGLGSMN[115]IPLVADLTQSISR	92	0	0	0	0	0	0	0	0	0	0	0	0	0	0	0	0	1	0	0
n-Term	A0A498LM50	Peroxiredoxin-1-like protein	canonical	LVQAFQHTDKYGEVCPAGWKPGSDTIVPDVQK	n[15]LVQAFQHTDK[170]YGEVC[160]PAGWKPGSDTIVPDVQK	158	0	0	0	0	0	0	0	0	0	0	0	0	0	0	0	0	2	0	0
n-Term	A0A498LMB7	Alpha-actinin-2 isoform X2	canonical	MTLGMIWTIILRFAIQDISVEETSAK	n[15]MTLGM[147]IWT[181]IILRFAIQDISVEETSAK	188	0	0	0	0	0	0	0	0	0	0	0	0	0	0	0	0	0	0	1
n-Term	A0A498LMH4	Ras-related Rab-1A	canonical	EFADSLGIPFLETSAK	n[15]EFADSLGIPFLETSAK	138	0	0	0	0	0	0	0	0	0	0	0	0	0	1	0	0	0	0	0
n-Term	A0A498LMI1	Myosin heavy fast skeletal muscle-like protein	subsumed	MQGSLEDQIIAANPLLEAYGNAK	n[15]MQGSLEDQIIAAN[115]PLLEAYGNAK	214	2	0	0	0	0	0	0	0	0	0	0	0	0	0	0	0	0	0	0
n-Term	A0A498LMI1	Myosin heavy fast skeletal muscle-like protein	subsumed	RIEAPPHIFSISDNAYQFMLTDR	n[15]RIEAPPHIFSISDNAYQFMLTDR	147	1	0	0	0	0	0	0	0	0	0	0	0	0	0	0	0	0	0	0
n-Term	A0A498LMQ3	Enolase isoform X1	canonical	FGANAILGVSLAVCK	n[15]FGANAILGVSLAVC[160]K	106	1	0	0	0	0	0	0	0	0	0	0	0	0	0	0	0	0	0	0
n-Term	A0A498LMQ3	Enolase isoform X1	canonical	KACNCLLLK	n[15]KAC[160]NC[160]LLLK	335	3	0	0	0	0	0	0	0	0	0	0	0	0	0	0	0	0	0	0
n-Term	A0A498LMQ3	Enolase isoform X1	canonical	MSILKIHAR	n[15]M[147]SILK[142]IHAR[170]	1, 5, 9	0	0	0	0	0	0	0	0	0	0	0	0	0	0	0	0	0	0	3
n-Term	A0A498LMR0	Type I cytoskeletal 13-like protein	marginally distinguished	VKYENELALR	n[15]VKYENELALR	171	0	1	0	0	0	0	1	0	0	0	0	0	0	1	0	0	0	0	0
n-Term	A0A498LMT1	Histone H2B	marginally distinguished	KESYAIYVYK	n[15]KESYAIYVYK	33	0	0	0	0	0	0	0	0	0	0	0	0	0	0	0	0	0	0	1
n-Term	A0A498LMT1	Histone H2B	marginally distinguished	KESYAIYVYK	n[15]K[170]ESYAIYVYK	33	0	1	0	0	0	0	0	0	0	0	0	0	0	0	1	0	0	0	0
n-Term	A0A498LMT1	Histone H2B	marginally distinguished	KVLRDNIQGITK	n[15]K[142]VLRDNIQGITK	145	0	0	0	0	0	0	0	0	0	2	0	0	0	0	0	0	2	0	0
n-Term	A0A498LMT1	Histone H2B	marginally distinguished	KVLRDNIQGITKPAIR	n[15]KVLR[170]DN[115]IQGITKPAIR	145, 148	0	0	0	0	0	0	0	0	0	0	0	0	0	0	0	0	0	0	2
n-Term	A0A498LMT1	Histone H2B	marginally distinguished	KVLRDNIQGITKPAIR	n[15]K[142]VLRDN[115]IQGITKPAIR	145	0	0	0	0	0	0	0	0	0	0	0	0	0	0	0	0	2	0	0
n-Term	A0A498LMT1	Histone H2B	marginally distinguished	KVLRDNIQGITKPAIR	n[15]K[170]VLRDNIQGITKPAIR	145	0	0	0	0	0	0	0	0	0	1	0	0	0	0	0	0	0	0	0
n-Term	A0A498LMT1	Histone H2B	marginally distinguished	KVLRDNIQGITKPAIR	n[15]K[170]VLR[170]DN[115]IQGITKPAIR	145, 148	0	0	0	0	0	0	0	0	0	2	0	0	0	0	0	0	0	0	0
n-Term	A0A498LMT1	Histone H2B	marginally distinguished	SRKESYAIYVYK	n[15]SRKESYAIYVYK	31	0	0	0	0	0	0	1	0	0	0	0	0	0	0	0	0	0	0	1
n-Term	A0A498LMT1	Histone H2B	marginally distinguished	VLKQVHPDTGISSK	n[15]VLKQVHPDTGISSK[142]	43, 56	0	0	0	0	0	0	0	0	0	0	0	2	0	0	0	0	0	0	0
n-Term	A0A498LMT8	Beta-crystallin B3-like protein	canonical	KMEIVDDDIPSLWVHGFQDHVASAK	n[15]K[170]MEIVDDDIPSLWVHGFQDHVASAK	457	0	0	2	0	0	0	0	0	0	0	0	0	0	0	0	0	0	0	0
n-Term	A0A498LMT8	Beta-crystallin B3-like protein	canonical	WSTWTNSQNSNCLLSVRPLR	n[15]WSTWTNSQNSNC[160]LLSVRPLR	418	0	0	1	0	0	0	0	0	0	0	0	0	0	0	0	0	0	0	0
n-Term	A0A498LN29	Zonadhesin-like isoform X1	canonical	SSVKPENLRPHMESISSTSESSSTEPEKPSAR	n[15]SSVK[170]PEN[115]LRPHMESISSTSESSSTEPEKPSAR	929	0	0	0	0	0	0	0	0	0	0	0	0	0	0	0	0	0	1	0
n-Term	A0A498LN48	Vesicle-associated membrane-associated B-like isoform X1	canonical	KSTVMSAPHSSPAVR	n[15]KSTVMSAPHSSPAVR	418	0	0	0	0	0	0	0	0	0	0	2	0	0	0	0	0	0	0	0
n-Term	A0A498LN73	Phosphoglycerate mutase (EC 5.4.2.11) (EC 5.4.2.4)	canonical	AAYRLVLIRHGESCWNQENR	n[15]AAYRLVLIRHGESC[160]WNQENR	2	0	0	0	0	0	0	0	0	0	0	1	0	0	0	0	0	0	0	0
n-Term	A0A498LN83	Alpha cardiac	representative	AVFPSIVGRPRHQGVMVGMGQKDSYVGDEAQSK	n[15]AVFPSIVGRPRHQGVM[147]VGMGQKDSYVGDEAQSK	31	0	0	0	0	0	0	0	1	0	0	0	0	0	0	0	0	0	0	0
n-Term	A0A498LN83	Alpha cardiac	representative	CDIDIRKDLYANNVLSGGTTMYPGIADR	n[15]C[143]DIDIR[170]KDLYAN[115]NVLSGGTTMYPGIADR	287, 292	2	0	0	0	0	0	0	0	0	0	0	0	0	0	0	0	0	0	0
n-Term	A0A498LN83	Alpha cardiac	representative	CDIDIRKDLYANNVLSGGTTMYPGIADR	n[15]C[143]DIDIR[170]KDLYAN[115]N[115]VLSGGTTMYPGIADR	287, 292	0	0	0	2	0	0	0	0	0	0	0	0	0	0	0	0	0	0	0
n-Term	A0A498LN83	Alpha cardiac	representative	CDIDIRKDLYANNVLSGGTTMYPGIADR	n[15]C[160]DIDIRKDLYANNVLSGGTTMYPGIADR	287	8	0	2	9	2	0	1	1	0	0	0	0	0	0	0	0	0	1	0
n-Term	A0A498LN83	Alpha cardiac	representative	CDIDIRKDLYANNVLSGGTTMYPGIADR	n[15]C[160]DIDIRKDLYANNVLSGGTTM[147]YPGIADR	287	1	0	1	1	0	0	0	3	0	0	0	0	0	0	0	0	0	0	0
n-Term	A0A498LN83	Alpha cardiac	representative	CDIDIRKDLYANNVLSGGTTMYPGIADR	n[15]C[160]DIDIRKDLYANN[115]VLSGGTTMYPGIADR	287	1	0	0	0	0	0	0	0	0	0	0	0	0	0	0	0	0	0	0
n-Term	A0A498LN83	Alpha cardiac	representative	CDIDIRKDLYANNVLSGGTTMYPGIADR	n[15]C[160]DIDIRKDLYAN[115]NVLSGGTTMYPGIADR	287	3	0	0	2	1	0	0	1	0	0	0	0	0	0	0	0	0	0	0
n-Term	A0A498LN83	Alpha cardiac	representative	CDIDIRKDLYANNVLSGGTTMYPGIADR	n[15]C[160]DIDIRKDLYAN[115]N[115]VLSGGTTMYPGIADR	287	0	0	0	1	0	0	0	0	0	0	0	0	0	0	0	0	0	0	0
n-Term	A0A498LN83	Alpha cardiac	representative	CDIDIRKDLYANNVLSGGTTMYPGIADR	n[15]C[160]DIDIR[170]KDLYAN[115]N[115]VLSGGTTMYPGIADR	287, 292	0	0	0	0	0	0	0	2	0	0	0	0	0	0	0	0	0	0	0
n-Term	A0A498LN83	Alpha cardiac	representative	DSYVGDEAQSKR	n[15]DSYVGDEAQSKR	53	0	0	0	0	0	0	0	1	0	0	0	0	0	0	0	0	0	0	0
n-Term	A0A498LN83	Alpha cardiac	representative	EKLCYVALDFENEMATAASSSSLEK	n[15]EKLC[160]YVALDFENEMATAASSSSLEK	216	3	0	0	4	1	0	0	0	0	0	0	0	0	0	0	0	0	0	0
n-Term	A0A498LN83	Alpha cardiac	representative	EKLCYVALDFENEMATAASSSSLEK	n[15]EK[170]LC[160]YVALDFENEMATAASSSSLEK	216	0	0	0	2	1	0	0	2	0	0	0	0	0	0	0	0	0	0	0
n-Term	A0A498LN83	Alpha cardiac	representative	EKLCYVALDFENEMATAASSSSLEK	n[15]EK[170]LC[160]YVALDFEN[115]EMATAASSSSLEK	216	6	0	0	2	0	0	0	1	0	0	0	0	0	0	0	0	0	0	0
n-Term	A0A498LN83	Alpha cardiac	representative	FRCPETLFQPSFIGMESAGIHETAYNSIMK	n[15]FRC[160]PETLFQPSFIGMESAGIHETAYNSIMK	257	40	0	1	1	11	0	0	1	0	3	1	1	0	0	0	0	1	0	0
n-Term	A0A498LN83	Alpha cardiac	representative	FRCPETLFQPSFIGMESAGIHETAYNSIMK	n[15]FRC[160]PETLFQPSFIGMESAGIHETAYNSIM[147]K	257	0	0	0	0	1	0	0	0	0	0	0	0	0	0	0	0	1	0	0
n-Term	A0A498LN83	Alpha cardiac	representative	FRCPETLFQPSFIGMESAGIHETAYNSIMK	n[15]FRC[160]PETLFQPSFIGMESAGIHETAYNSIM[147]K[170]	257	0	0	0	0	1	0	0	0	0	0	0	0	0	0	0	0	0	0	0
n-Term	A0A498LN83	Alpha cardiac	representative	FRCPETLFQPSFIGMESAGIHETAYNSIMK	n[15]FRC[160]PETLFQPSFIGMESAGIHETAYN[115]SIMK	257	21	0	2	0	9	0	0	0	0	1	0	0	0	0	0	0	0	0	0
n-Term	A0A498LN83	Alpha cardiac	representative	FRCPETLFQPSFIGMESAGIHETAYNSIMK	n[15]FRC[160]PETLFQPSFIGM[147]ESAGIHETAYNSIMK	257	0	0	0	0	0	0	0	0	0	1	0	0	0	0	0	0	0	0	0
n-Term	A0A498LN83	Alpha cardiac	representative	FRCPETLFQPSFIGMESAGIHETAYNSIMK	n[15]FRC[160]PETLFQPSFIGM[147]ESAGIHETAYNSIMK[170]	257	0	0	0	0	1	0	0	0	0	0	0	0	0	0	0	0	0	0	0
n-Term	A0A498LN83	Alpha cardiac	representative	FRCPETLFQPSFIGMESAGIHETAYNSIMK	n[15]FRC[160]PETLFQPSFIGM[147]ESAGIHETAYNSIM[147]K[170]	257	1	0	0	0	0	0	0	0	0	0	0	0	0	0	0	0	0	0	0
n-Term	A0A498LN83	Alpha cardiac	representative	FRCPETLFQPSFIGMESAGIHETAYNSIMK	n[15]FRC[160]PETLFQPSFIGM[147]ESAGIHETAYN[115]SIMK	257	0	0	0	0	1	0	0	0	0	0	0	0	0	0	0	0	0	0	0
n-Term	A0A498LN83	Alpha cardiac	representative	FRCPETLFQPSFIGMESAGIHETAYNSIMK	n[15]FRC[160]PETLFQPSFIGM[147]ESAGIHETAYN[115]SIMK[142]	257, 286	0	0	0	2	0	0	0	0	0	0	0	0	0	0	0	0	0	0	0
n-Term	A0A498LN83	Alpha cardiac	representative	FRCPETLFQPSFIGMESAGIHETAYNSIMK	n[15]FRC[160]PETLFQPSFIGM[147]ESAGIHETAYN[115]SIMK[170]	257	0	0	0	0	1	0	0	0	0	0	0	0	0	0	0	0	0	0	0
n-Term	A0A498LN83	Alpha cardiac	representative	HQGVMVGMGQKDSYVGDEAQSK	n[15]HQGVMVGMGQK[170]DSYVGDEAQSK	42	1	0	0	1	2	0	0	5	0	0	0	0	0	0	0	0	0	0	0
n-Term	A0A498LN83	Alpha cardiac	representative	HQGVMVGMGQKDSYVGDEAQSK	n[15]HQGVMVGM[147]GQK[170]DSYVGDEAQSK	42	0	0	0	0	0	0	0	3	0	0	0	0	0	0	0	0	0	0	0
n-Term	A0A498LN83	Alpha cardiac	representative	HQGVMVGMGQKDSYVGDEAQSK	n[15]HQGVM[147]VGMGQK[170]DSYVGDEAQSK	42	1	0	0	0	1	0	0	5	0	0	0	0	0	0	0	0	0	0	0
n-Term	A0A498LN83	Alpha cardiac	representative	HQGVMVGMGQKDSYVGDEAQSK	n[15]HQGVM[147]VGM[147]GQKDSYVGDEAQSK	42	4	0	2	0	1	0	0	1	0	0	2	0	0	0	0	0	0	0	0
n-Term	A0A498LN83	Alpha cardiac	representative	HQGVMVGMGQKDSYVGDEAQSKR	n[15]HQGVMVGMGQKDSYVGDEAQSKR	42	0	0	0	0	0	0	0	0	0	0	0	0	0	0	0	0	0	0	1
n-Term	A0A498LN83	Alpha cardiac	representative	HQGVMVGMGQKDSYVGDEAQSKR	n[15]HQGVMVGMGQK[170]DSYVGDEAQSKR	42	12	0	8	17	12	0	9	15	0	11	4	0	0	0	0	2	3	2	4
n-Term	A0A498LN83	Alpha cardiac	representative	HQGVMVGMGQKDSYVGDEAQSKR	n[15]HQGVMVGM[147]GQK[170]DSYVGDEAQSKR	42	2	0	1	0	0	0	0	3	0	0	0	0	0	0	0	1	0	0	0
n-Term	A0A498LN83	Alpha cardiac	representative	HQGVMVGMGQKDSYVGDEAQSKR	n[15]HQGVM[147]VGMGQK[170]DSYVGDEAQSKR	42	2	0	2	1	1	0	2	4	0	5	0	0	0	0	0	0	0	1	1
n-Term	A0A498LN83	Alpha cardiac	representative	KDLYANNVLSGGTTMYPGIADR	n[15]KDLYANNVLSGGTTMYPGIADR	293	1	0	0	0	1	0	0	1	0	0	0	1	0	0	0	0	0	0	0
n-Term	A0A498LN83	Alpha cardiac	representative	KDLYANNVLSGGTTMYPGIADR	n[15]KDLYANNVLSGGTTM[147]YPGIADR	293	0	0	0	0	1	0	0	0	0	0	0	0	0	0	0	0	0	0	0
n-Term	A0A498LN83	Alpha cardiac	representative	KDLYANNVLSGGTTMYPGIADR	n[15]KDLYAN[115]NVLSGGTTMYPGIADR	293	1	0	0	1	0	0	0	0	0	0	0	0	0	0	0	0	0	0	0
n-Term	A0A498LN83	Alpha cardiac	representative	KDLYANNVLSGGTTMYPGIADR	n[15]KDLYAN[115]NVLSGGTTM[147]YPGIADR	293	0	1	0	0	0	0	0	0	0	0	0	0	0	0	0	0	0	0	0
n-Term	A0A498LN83	Alpha cardiac	representative	KDLYANNVLSGGTTMYPGIADR	n[15]KDLYAN[115]N[115]VLSGGTTMYPGIADR	293	0	0	0	0	1	0	0	0	0	0	0	0	0	0	0	0	0	0	0
n-Term	A0A498LN83	Alpha cardiac	representative	LCYVALDFENEMATAASSSSLEK	n[15]LC[160]YVALDFENEMATAASSSSLEK	218	16	0	0	0	0	0	0	0	0	0	0	0	0	0	0	0	0	0	0
n-Term	A0A498LN83	Alpha cardiac	representative	MCDDDETTALVCDNGSGLVK	n[15]MC[160]DDDETTALVC[160]DNGSGLVK	1	0	0	0	0	0	0	0	0	0	0	0	0	0	0	0	0	1	0	0
n-Term	A0A498LN83	Alpha cardiac	representative	MQKEITALAPSTMK	n[15]MQKEITALAPSTMK	315	0	0	0	0	0	0	0	1	0	0	0	0	0	0	0	0	1	0	0
n-Term	A0A498LN83	Alpha cardiac	representative	MQKEITALAPSTMK	n[15]MQK[170]EITALAPSTMK	315	1	0	0	0	2	0	0	0	0	1	0	0	0	0	0	0	0	0	0
n-Term	A0A498LN83	Alpha cardiac	representative	MQKEITALAPSTMK	n[15]MQK[170]EITALAPSTM[147]K	315	1	0	0	2	1	0	0	0	0	0	0	0	0	0	0	0	0	0	0
n-Term	A0A498LN83	Alpha cardiac	representative	RGILTLKYPIEHGIITNWDDMEK	n[15]RGILTLKYPIEHGIITNWDDMEK	64	0	0	0	0	0	0	0	4	0	0	0	0	0	0	0	0	0	0	0
n-Term	A0A498LN83	Alpha cardiac	representative	YPIEHGIITNWDDMEKIWHHTFYNELR	n[15]YPIEHGIITNWDDMEKIWHHTFYNELR	71	9	0	2	0	0	0	7	4	0	28	4	1	0	0	0	0	6	0	0
n-Term	A0A498LN83	Alpha cardiac	representative	YPIEHGIITNWDDMEKIWHHTFYNELR	n[15]YPIEHGIITNWDDMEK[170]IWHHTFYNELR	71	0	0	0	0	1	0	0	0	0	14	0	0	0	0	0	0	0	0	0
n-Term	A0A498LN83	Alpha cardiac	representative	YPIEHGIITNWDDMEKIWHHTFYNELR	n[15]YPIEHGIITNWDDMEK[170]IWHHTFYN[115]ELR	71	0	0	0	0	0	0	0	0	0	1	0	0	0	0	0	0	0	0	0
n-Term	A0A498LN83	Alpha cardiac	representative	YPIEHGIITNWDDMEKIWHHTFYNELR	n[15]YPIEHGIITNWDDM[147]EKIWHHTFYNELR	71	20	0	0	0	0	0	0	0	0	4	0	0	0	0	0	0	0	0	0
n-Term	A0A498LN83	Alpha cardiac	representative	YPIEHGIITNWDDMEKIWHHTFYNELR	n[15]YPIEHGIITNW[202]DDMEKIWHHTFYNELR	71	2	0	0	0	0	0	0	0	0	4	0	0	0	0	0	0	0	0	0
n-Term	A0A498LN83	Alpha cardiac	representative	YPIEHGIITNWDDMEKIWHHTFYNELR	n[15]YPIEHGIITNW[202]DDMEK[170]IWHHTFYNELR	71	0	0	0	0	0	0	0	0	0	1	0	0	0	0	0	0	0	0	0
n-Term	A0A498LN83	Alpha cardiac	representative	YPIEHGIITNWDDMEKIWHHTFYNELR	n[15]YPIEHGIITN[115]WDDMEKIWHHTFYNELR	71	3	0	1	0	0	0	1	6	0	1	2	0	0	0	0	0	2	0	0
n-Term	A0A498LN83	Alpha cardiac	representative	YPIEHGIITNWDDMEKIWHHTFYNELR	n[15]YPIEHGIITN[115]WDDMEK[170]IWHHTFYNELR	71	0	0	0	0	0	0	0	0	0	3	0	0	0	0	0	0	0	0	0
n-Term	A0A498LN83	Alpha cardiac	representative	YPIEHGIITNWDDMEKIWHHTFYNELR	n[15]YPIEHGIITN[115]WDDM[147]EKIWHHTFYNELR	71	3	0	0	0	0	0	0	0	0	0	0	0	0	0	0	0	0	0	0
n-Term	A0A498LNA1	Glutathione S-transferase Mu 3-like protein	marginally distinguished	KHNLCGETEEEQTR	n[15]KHNLC[160]GETEEEQTR	83	0	0	0	0	0	0	1	0	0	4	0	0	0	1	0	0	0	0	0
n-Term	A0A498LNA1	Glutathione S-transferase Mu 3-like protein	marginally distinguished	KHNLCGETEEEQTRVDILENQAMDFR	n[15]KHNLC[160]GETEEEQTRVDILENQAMDFR	83	0	0	0	1	0	0	0	0	0	0	0	0	0	5	0	0	0	0	1
n-Term	A0A498LNA1	Glutathione S-transferase Mu 3-like protein	marginally distinguished	KHNLCGETEEEQTRVDILENQAMDFR	n[15]KHNLC[160]GETEEEQTRVDILEN[115]QAMDFR	83	0	0	0	0	0	0	0	0	0	0	0	0	0	1	0	0	0	0	0
n-Term	A0A498LNC0	Calponin	canonical	AIGEYGLKPHDIFEANDLFEDMNHTQVQCTLVTLAGVAK	n[15]AIGEYGLK[170]PHDIFEAN[115]DLFEDM[147]NHTQVQC[160]TLVTLAGVAK	93	0	0	0	0	0	0	0	2	0	0	0	0	0	0	0	0	0	0	0
n-Term	A0A498LNC0	Calponin	canonical	AVPDNFMEGLKDGVILCELINK	n[15]AVPDN[115]FMEGLK[170]DGVILC[160]ELINK	44	0	0	0	0	0	0	0	1	0	0	0	0	0	0	0	0	0	0	0
n-Term	A0A498LNC0	Calponin	canonical	MKAGNSIISQQMGSNK	n[15]MK[170]AGN[115]SIISQQMGSNK	158	0	0	0	0	0	0	0	1	0	0	0	0	0	0	0	0	0	0	0
n-Term	A0A498LNC0	Calponin	canonical	VNHSTLNWHKLENITHFVR	n[15]VNHSTLNWHK[170]LENITHFVR	74	0	0	0	0	0	0	0	4	0	0	0	0	0	0	0	0	0	0	0
n-Term	A0A498LNC0	Calponin	canonical	VNHSTLNWHKLENITHFVR	n[15]VNHSTLN[115]WHK[170]LENITHFVR	74	0	0	0	0	0	0	0	3	0	0	0	0	0	0	0	0	0	0	0
n-Term	A0A498LNC0	Calponin	canonical	VNHSTLNWHKLENITHFVR	n[15]VN[115]HSTLN[115]WHK[170]LENITHFVR	74	0	0	0	0	0	0	0	1	0	0	0	0	0	0	0	0	0	0	0
n-Term	A0A498LNC0	Calponin	canonical	YCAKPHEQDGTDFIN	n[15]YC[160]AKPHEQDGTDFIN	273	0	0	0	0	0	0	0	3	0	0	0	0	0	0	0	0	0	0	0
n-Term	A0A498LND3	Arrestin-C-like protein	canonical	SFMMSDKPVLLEASLDKEIYYHGDPIPVTVK	n[15]SFMMSDK[170]PVLLEASLDKEIYYHGDPIPVTVK	266	0	0	2	0	0	0	0	0	0	0	0	0	0	0	0	0	0	0	0
n-Term	A0A498LND3	Arrestin-C-like protein	canonical	SFMMSDKPVLLEASLDKEIYYHGDPIPVTVK	n[15]SFM[147]MSDK[170]PVLLEASLDKEIYYHGDPIPVTVK	266	0	0	1	0	0	0	0	0	0	0	0	0	0	0	0	0	0	0	0
n-Term	A0A498LNF1	Type I cytoskeletal 13-like protein	marginally distinguished	VKYENELALR	n[15]VKYENELALR	171	0	1	0	0	0	0	1	0	0	0	0	0	0	1	0	0	0	0	0
n-Term	A0A498LNH7	GDH 6PGL endoplasmic bifunctional-like protein	canonical	SKQIVFYLGHGNLQYPAILVSK	n[15]SK[170]QIVFYLGHGN[115]LQYPAILVSK	407	0	0	0	0	0	0	0	0	0	0	0	0	0	0	0	1	0	0	0
n-Term	A0A498LNK6	LIM domain-binding 3-like protein	canonical	RAANLQSKSFR	n[15]RAANLQSKSFR	143	0	0	0	0	1	0	0	0	0	0	0	0	0	0	0	0	0	0	0
n-Term	A0A498LNN2	Tubulin alpha-1C chain	marginally distinguished	AVFVDLEPTVIDEVR	n[15]AVFVDLEPTVIDEVR	79, 512	0	0	0	0	0	0	2	0	0	0	0	0	0	0	0	0	0	0	0
n-Term	A0A498LNN2	Tubulin alpha-1C chain	marginally distinguished	LSVDYGK	n[15]LSVDYGK	171, 604	0	0	0	2	0	0	0	0	0	0	0	0	0	0	0	0	0	0	0
n-Term	A0A498LNN2	Tubulin alpha-1C chain	marginally distinguished	QLFHPEQLITGKEDAANNYAR	n[15]QLFHPEQLITGKEDAANNYAR	99, 532	0	0	0	0	0	0	2	0	0	0	6	0	0	0	0	0	0	0	0
n-Term	A0A498LNN2	Tubulin alpha-1C chain	marginally distinguished	QLFHPEQLITGKEDAANNYAR	n[15]Q[111]LFHPEQLITGKEDAANN[115]YAR	99, 532	0	0	2	0	0	0	4	0	0	0	0	0	0	0	0	0	2	0	0
n-Term	A0A498LNN2	Tubulin alpha-1C chain	marginally distinguished	QLFHPEQLITGKEDAANNYAR	n[15]Q[111]LFHPEQLITGKEDAAN[115]NYAR	99, 532	0	0	0	0	0	0	0	0	0	0	2	0	0	0	0	0	2	0	0
n-Term	A0A498LNN6	Malic enzyme	indistinguishable representative	SFLDAVNVIKPTAIIGVSGAGR	n[15]SFLDAVNVIKPTAIIGVSGAGR	551	0	0	0	0	0	0	0	0	1	0	0	0	0	0	0	0	0	0	0
n-Term	A0A498LNN9	Formimidoyltransferase-cyclodeaminase	canonical	LSDMLKVPVYLYGEAARK	n[15]LSDMLK[170]VPVYLYGEAARK	115	0	0	0	0	0	0	0	0	0	0	0	0	0	0	0	1	0	0	0
n-Term	A0A498LNN9	Formimidoyltransferase-cyclodeaminase	canonical	LVISKLGLDSLGPFVPK	n[15]LVISK[170]LGLDSLGPFVPK	302	0	0	0	0	0	0	0	0	0	0	0	0	0	0	0	1	0	0	0
n-Term	A0A498LNN9	Formimidoyltransferase-cyclodeaminase	canonical	NKEVIDTIADAVSATEGCSLLDVDPGSSTNR	n[15]NKEVIDTIADAVSATEGC[160]SLLDVDPGSSTNR	16	0	0	0	0	0	0	0	0	0	0	0	0	0	0	0	2	0	0	0
n-Term	A0A498LNN9	Formimidoyltransferase-cyclodeaminase	canonical	TVYTFVGPPAAVIEGALNAAR	n[15]TVYTFVGPPAAVIEGALN[115]AAR	47	0	0	0	0	0	0	0	0	0	0	0	0	0	0	0	1	0	0	0
n-Term	A0A498LNT8	Tubulin alpha chain	marginally distinguished	AVFVDLEPTVIDEVR	n[15]AVFVDLEPTVIDEVR	65	0	0	0	0	0	0	1	0	0	0	0	0	0	0	0	0	0	0	0
n-Term	A0A498LNT8	Tubulin alpha chain	marginally distinguished	LSVDYGK	n[15]LSVDYGK	157	0	0	0	1	0	0	0	0	0	0	0	0	0	0	0	0	0	0	0
n-Term	A0A498LNT8	Tubulin alpha chain	marginally distinguished	QLFHPEQLITGKEDAANNYAR	n[15]QLFHPEQLITGKEDAANNYAR	85	0	0	0	0	0	0	1	0	0	0	3	0	0	0	0	0	0	0	0
n-Term	A0A498LNT8	Tubulin alpha chain	marginally distinguished	QLFHPEQLITGKEDAANNYAR	n[15]Q[111]LFHPEQLITGKEDAANN[115]YAR	85	0	0	1	0	0	0	2	0	0	0	0	0	0	0	0	0	1	0	0
n-Term	A0A498LNT8	Tubulin alpha chain	marginally distinguished	QLFHPEQLITGKEDAANNYAR	n[15]Q[111]LFHPEQLITGKEDAAN[115]NYAR	85	0	0	0	0	0	0	0	0	0	0	1	0	0	0	0	0	1	0	0
n-Term	A0A498LP17	WD repeat-containing 6	indistinguishable representative	RVSVCAEAFNPDDDEEDSEPR	n[15]RVS[167]VC[160]AEAFNPDDDEEDSEPR	2638	0	0	0	0	0	0	0	0	0	0	1	0	0	0	0	0	0	0	0
n-Term	A0A498LP40	UPF0568 protein C14orf166-like	canonical	KLTALEYHNPTGFDCKDETEFR	n[15]K[170]LTALEYHN[115]PTGFDC[160]KDETEFR	5	0	0	0	0	0	0	0	0	0	0	0	0	0	1	0	0	0	0	0
n-Term	A0A498LP40	UPF0568 protein C14orf166-like	canonical	NCKPVTETSDAQK	n[15]NC[160]KPVTETSDAQK	101	0	0	0	0	0	0	0	0	0	0	0	0	0	2	0	0	0	0	0
n-Term	A0A498LP40	UPF0568 protein C14orf166-like	canonical	NCKPVTETSDAQK	n[15]N[115]C[160]KPVTETSDAQK	101	0	0	0	0	0	0	0	0	0	0	0	0	0	3	0	0	0	0	0
n-Term	A0A498LP40	UPF0568 protein C14orf166-like	canonical	NCKPVTETSDAQK	n[15]N[115]C[160]K[170]PVTETSDAQK	101	0	0	0	0	0	0	0	0	0	0	0	0	0	1	0	0	0	0	0
n-Term	A0A498LP94	B-cell lymphoma 3-like protein	representative	NRQILLYSATFPISVQK	n[15]NRQILLYSATFPISVQK	761	0	0	0	0	0	0	0	0	0	0	0	0	0	9	0	0	0	2	0
n-Term	A0A498LP94	B-cell lymphoma 3-like protein	representative	QKVHCLNTLFSR	n[15]Q[111]KVHC[160]LNTLFSR	811	0	0	0	0	0	0	0	0	0	0	0	0	0	1	0	0	0	0	0
n-Term	A0A498LPH1	60S ribosomal L7a	canonical	KTCTSVAFTQTNPEDK	n[15]KTC[160]TSVAFTQTNPEDK	197	0	0	0	1	0	0	0	0	5	1	0	1	0	0	0	0	0	0	0
n-Term	A0A498LPH1	60S ribosomal L7a	canonical	KTCTSVAFTQTNPEDK	n[15]K[170]TC[160]TSVAFTQTNPEDK	197	0	0	0	0	0	0	0	0	1	0	0	0	0	0	0	0	0	0	0
n-Term	A0A498LPH1	60S ribosomal L7a	canonical	KTCTSVAFTQTNPEDKAALAK	n[15]KTC[160]TSVAFTQTNPEDKAALAK	197	0	0	0	0	0	0	0	0	0	1	0	2	0	0	0	0	0	1	0
n-Term	A0A498LPL8	Complement component C9	canonical	LKKVTATTVK	n[15]LK[142]KVT[181]AT[181]T[181]VK	271, 272	0	0	0	0	0	0	0	0	0	2	0	0	0	0	0	0	0	0	0
n-Term	A0A498LPQ5	Histone H2A	subsumed	HLQLAVRNDEELNKLLGGVTIAQGGVLPNIQAVLLPK	n[15]HLQLAVR[170]N[115]DEELNKLLGGVTIAQGGVLPNIQAVLLPK	83, 89	0	0	2	0	0	0	0	0	0	0	0	0	0	0	0	0	0	0	0
n-Term	A0A498LPQ5	Histone H2A	subsumed	NDEELNKLLGGVTIAQGGVLPNIQAVLLPK	n[15]NDEELNKLLGGVTIAQGGVLPNIQAVLLPK	90	0	0	1	0	0	0	0	0	0	0	0	0	0	0	0	1	0	0	1
n-Term	A0A498LPS4	Actin-related protein 2	canonical	VGNIEIKDLMVGDEASELR	n[15]VGN[115]IEIK[170]DLMVGDEASELR	47	0	0	0	0	0	0	0	0	0	1	0	0	0	0	0	0	0	0	0
n-Term	A0A498LPU5	Heavy polypeptide skeletal muscle	representative	MQGSLEDQIIAANPLLEAYGNAK	n[15]MQGSLEDQIIAAN[115]PLLEAYGNAK	215	2	0	0	0	0	0	0	0	0	0	0	0	0	0	0	0	0	0	0
n-Term	A0A498LPV0	Bifunctional glutamate proline--tRNA ligase isoform X3	canonical	GGEKPQQGQDSGAGGAGDGQGPK	n[15]GGEKPQQGQDSGAGGAGDGQGPK	1098	0	0	0	0	0	0	0	0	0	0	0	0	0	0	0	1	0	0	0
n-Term	A0A498LPZ0	Creatine kinase M-type-like protein	canonical	DMTDKEQEQLIADHFLFDKPVSPLLLAAGMAR	n[15]DMTDKEQEQLIADHFLFDKPVSPLLLAAGMAR	109	2	0	0	0	0	0	0	0	0	0	0	0	0	0	0	0	0	0	0
n-Term	A0A498LPZ0	Creatine kinase M-type-like protein	canonical	DMTDKEQEQLIADHFLFDKPVSPLLLAAGMAR	n[15]DMTDKEQEQLIADHFLFDK[170]PVSPLLLAAGMAR	109	1	0	0	0	0	0	0	0	0	0	0	0	0	0	0	0	0	0	0
n-Term	A0A498LPZ0	Creatine kinase M-type-like protein	canonical	DMTDKEQEQLIADHFLFDKPVSPLLLAAGMAR	n[15]DMTDK[170]EQEQLIADHFLFDKPVSPLLLAAGMAR	109	4	0	0	0	0	0	0	0	0	0	0	0	0	0	0	0	0	0	0
n-Term	A0A498LPZ0	Creatine kinase M-type-like protein	canonical	GTGGVDTASVGGVFDISNADR	n[15]GTGGVDTASVGGVFDISNADR	252	0	0	0	0	1	0	0	0	0	0	0	0	0	0	1	0	0	0	0
n-Term	A0A498LPZ0	Creatine kinase M-type-like protein	canonical	HGGYKPTDKHSTDLNWENLKGGDDLDPNYVLSSR	n[15]HGGYKPTDKHSTDLNWENLKGGDDLDPNYVLSSR	28	1	0	0	0	1	0	0	0	0	0	0	0	0	0	0	0	0	0	0
n-Term	A0A498LPZ0	Creatine kinase M-type-like protein	canonical	HGGYKPTDKHSTDLNWENLKGGDDLDPNYVLSSR	n[15]HGGYKPTDKHSTDLNWENLKGGDDLDPN[115]YVLSSR	28	1	0	0	0	0	0	0	0	0	0	0	0	0	0	0	0	0	0	0
n-Term	A0A498LPZ0	Creatine kinase M-type-like protein	canonical	HGGYKPTDKHSTDLNWENLKGGDDLDPNYVLSSR	n[15]HGGYK[142]PTDKHSTDLN[115]WENLKGGDDLDPNYVLSSR	28, 32	2	0	0	0	0	0	0	0	0	0	0	0	0	0	0	0	0	0	0
n-Term	A0A498LPZ0	Creatine kinase M-type-like protein	canonical	HGGYKPTDKHSTDLNWENLKGGDDLDPNYVLSSR	n[15]HGGYK[142]PTDK[170]HSTDLNWENLKGGDDLDPNYVLSSR	28, 32	2	0	0	0	0	0	0	0	0	0	0	0	0	0	0	0	0	0	0
n-Term	A0A498LPZ0	Creatine kinase M-type-like protein	canonical	HGGYKPTDKHSTDLNWENLKGGDDLDPNYVLSSR	n[15]HGGYK[170]PTDKHSTDLN[115]WENLKGGDDLDPNYVLSSR	28	1	0	0	0	0	0	0	0	0	0	0	0	0	0	0	0	0	0	0
n-Term	A0A498LPZ0	Creatine kinase M-type-like protein	canonical	HSTDLNWENLKGGDDLDPNYVLSSR	n[15]HSTDLNWENLKGGDDLDPNYVLSSR	37	1	0	0	0	0	0	0	0	0	0	0	0	0	0	0	0	0	0	0
n-Term	A0A498LPZ0	Creatine kinase M-type-like protein	canonical	LEKGESIDDMIPAQK	n[15]LEKGESIDDMIPAQK	298	1	0	0	0	0	0	0	0	0	0	0	0	0	0	0	0	0	0	0
n-Term	A0A498LPZ0	Creatine kinase M-type-like protein	canonical	TVGCVAGDEESYEVFKELFDPVISDR	n[15]TVGC[160]VAGDEESYEVFKELFDPVISDR	2	1	0	0	0	1	0	0	0	0	0	0	0	0	0	0	0	0	0	0
n-Term	A0A498LQB7	Alpha-actinin-1 isoform X5	canonical	MTLGMIWTIILRFAIQDISVEETSAK	n[15]MTLGM[147]IWT[181]IILRFAIQDISVEETSAK	131	0	0	0	0	0	0	0	0	0	0	0	0	0	0	0	0	0	0	1
n-Term	A0A498LQI5	Carboxypeptidase D-like protein	canonical	RCEFTSCCQNIMEYGMETVR	n[15]RC[160]EFTSC[160]C[160]QNIMEYGMETVR	28	0	0	5	0	0	0	0	0	0	0	0	0	0	0	0	0	0	0	0
n-Term	A0A498LQI5	Carboxypeptidase D-like protein	canonical	RCEFTSCCQNIMEYGMETVR	n[15]RC[160]EFTSC[160]C[160]QNIMEYGM[147]ETVR	28	0	0	1	0	0	0	0	0	0	0	0	0	0	0	0	0	0	0	0
n-Term	A0A498LQI5	Carboxypeptidase D-like protein	canonical	RCEFTSCCQNIMEYGMETVR	n[15]RC[160]EFTSC[160]C[160]QN[115]IMEYGMETVR	28	0	0	1	0	0	0	0	0	0	0	0	0	0	0	0	0	0	0	0
n-Term	A0A498LQN4	Serpin H1-like protein	canonical	SKADLSNISGKK	n[15]SKADLSNISGKK	320	0	0	0	0	0	0	0	0	0	0	0	0	0	0	0	0	0	0	1
n-Term	A0A498LQS3	Collagen alpha-6(VI) chain-like protein	canonical	TMIEIVKELNIAEDKWR	n[15]TMIEIVK[170]ELNIAEDKWR	1379	0	0	1	0	0	0	0	0	0	0	0	0	0	0	0	0	0	0	0
[truncated: 28,150 more rows]

## Sheet: Methylated_peptide_plot
					AB	Brain	Embryo	Eye	FG	Fin	GB	Gill	Gut	Heart	Kidney	Liver	MG	Muscle	Plasma	Scales	Skin	SC	Spleen		Organ	#Methylpeptide	#Canonical methylproteins
[truncated: 22 more rows]

[truncated: 4 more sheets: All Phospho, Phosphopeptide_plot, P_proteins_in text, Muscle_PTM_figure]
