# Supplementary material for: The Proteome Map and PeptideAtlas of a widely cultivated tropical water fish Labeo rohita: A resource for the Aquaculture Community
Source: Research Square preprint supplement (doi:10.21203/rs.3.rs-397364/v1), 2021-04-12
Supplement: Supplementary file 9 [file e6c425b8f200d589b4fdebc8.xlsx]

## Sheet: Description_of_Worksheets
			Worksheet	Description
			Log_Avg_19_8498	Abundance (values with their log transformed values) for all the identified protein in all samples obtained after proteome discoverer analysis. (Proteome discoverer gave the identification of 8498 proteins of which expression analysis was done only for 5702 canonical proteins).
			Log_Avg_19_Mv_del_8128	Abundance (values with their log transformed values) for all the identified protein in all samples after removing those proteins having missing values across all samples).
			Main_exp_sheet_5702	Log 2 abundance values for the 5702 proteins which were taken for expression analysis. These 5702 proteins are those which matched with canonical protein list obtained from TPP analysis i.e. peptide atlas canonical proteins.
			Input_Ttl_19_PA_5702	Input sheet for heatmap for protein expression of all 5702 across the organs (i.e. Figure 2a).
			Input_Shared_19_PA_23	Input sheet for heatmap for protein expression of 23 shared proteins across the organs (i.e. Supplementary figure S3).

## Sheet: Log_Avg_19_8498
			Air Bladder						Brain						Eye						Female Gonad						Gall bladder			Gill						Gut						Heart						Kidney
Accession	Mix NCBI up	Protein	PH 2.5	PH 8	PH 13	AB avg	log AB		PH 2.5	PH 8	PH 13	Brain avg	log Brain		PH 2.5	PH 8	PH 13	Eye avg	log Eye		PH 2.5	PH 8	PH 13	F. Gonad avg	log F. Gonad		PH	log GB+GBE		PH 2.5	PH 8	PH 13	Gill avg	log Gill		PH 2.5	PH 8	PH 13	Gut avg	log Gut		PH 2.5	PH 8	PH 13	Heart avg	log Heart		PH 2.5	PH 8
RXN02683.1	A0A498MUQ8	Filamin-A-like isoform X2	1.59583e+11	7.50563e+10	3.20088e+11	1.84909e+11	37.428		1243877250	282960512	8.08449e+08	7.78429e+08	29.536		4165905680	851103119	6934670974	3.98389e+09	31.8915		5676772996	2.53623e+09	5.80268e+09	4.67189e+09	32.1214		4.24776e+10	35.306		19339925694	15376693345	6498835055	13738484698	33.6775		155917015606	6.47143e+09	1.90255e+11	1.17548e+11	36.7745		1935545929	1.74256e+10	1.90536e+09	7.08885e+09	32.7229		6.20336e+09	5.51077e+10
RXN29074.1	A0A498NB91	Collagen alpha-3(VI) chain-like protein	9.69219e+10	7.7268e+10	2.85046e+11	1.53079e+11	37.1555		4.99687e+09		2.30351e+08	2613612647	31.2834		2.94125e+11	5.73871e+10	931828856561	4.2778e+11	38.6381		2.34827e+09	7.32464e+08	3.53573e+09	2.20549e+09	31.0385		6.37309e+10	35.8913		4.26185e+10	3.14354e+10	2.64285e+10	3.34941e+10	34.9632		1.31027e+11	9.72654e+08	1.59086e+11	97028324659	36.4977		3757898209	22440973251	2081989930	9.42695e+09	33.1341		9.36039e+09	1.7312e+11
RXN11823.1	A0A498LW71	Talin-1 isoform X1	17008850388	6.09081e+09	2.81102e+10	1.707e+10	33.9907		3.47317e+08	21239845	2.74734e+08	2.1443e+08	27.6759		191048924	30768995	586244743	2.69354e+08	28.0049		4.36852e+07	3.7741e+07	2.86148e+08	1.22525e+08	26.8685		3.44566e+09	31.6821		2992473425	5.60255e+09	1.5068e+09	3.36728e+09	31.6489		1.26145e+10	2.63757e+07	1.67419e+10	9.79426e+09	33.1893		425433989	4.28788e+09	434351336	1.71589e+09	30.6763		2.58968e+09	5.79008e+09
RXN26771.1	A0A498N1X7	Alpha cardiac muscle 1	58871134918	9082535464	6.55936e+12	2.2091e+12	41.0066		712935768			712935768	29.4092				108704376	108704376	26.6958		3.67976e+10	1.22866e+09	1.666e+10	1.82287e+10	34.0855		349102565928	38.3449		4.82763e+11	5912425806		2.44338e+11	37.8301		3.36686e+11		2.00733e+12	1172007760008	40.0921		8726930042	51989847032	17646805730	26121194268	34.6045		36662432458	1.09998e+11
RXN19581.1	A0A498MEV5	Myosin-9 isoform X1	1.80969e+10	1.00095e+10	45368487614	2.44916e+10	34.5116		1.82174e+09	25065808	994756249	9.47188e+08	29.8191		993280477	306971052	2564187638	1288146389	30.2626		2061953447	4.1419e+08	3.46638e+09	1.98084e+09	30.8835		5361959704	32.3201		1.00246e+10	12425845138	6.60852e+09	9.68633e+09	33.1733		1.05032e+10	707373362	1.31763e+10	8.12893e+09	32.9204		5.7368e+08	2895360649	1266977064	1.57867e+09	30.5561		7.49695e+09	1.5818e+10
RXN33541.1	A0A498NNZ3	Myosin-11-like isoform X1	1.57922e+10	1.08626e+10	2.31893e+10	1.66147e+10	33.9517		621844108		2.88571e+10	1.47395e+10	33.779		216571535	3.03847e+07	666780666	3.04579e+08	28.1822		1.99091e+09	6.16593e+08	2.81951e+09	1.80901e+09	30.7525		25004496885	34.5415		9.13714e+09	1.14257e+10	1.16262e+10	1.07297e+10	33.3209		2.87698e+11	7.23316e+09	4.42758e+11	2.45896e+11	37.8393		165923918	9020064667	2.20604e+08	3.13553e+09	31.5461		1.35819e+09	2.89755e+10
RXN02394.1	A0A498L7I0	Type I cytoskeletal 18	1.48572e+11	37317990816	256957648120	1.47616e+11	37.1031		3.25976e+10	1120976829	5.58683e+09	13101813737	33.609		32018617976	6534632194	6.94393e+10	3.59975e+10	35.0672		1.10541e+10	7614142445	14183600637	1.09506e+10	33.3503		185471058259	37.4324		38845028110	3.23963e+10	3.24127e+10	3.45513e+10	35.008		5.14824e+10	487984685	6.90605e+10	4.03436e+10	35.2316		11567570815	15312804690	1.24427e+10	1.31077e+10	33.6097		1.0225e+11	8.00925e+10
RXN29944.1	A0A498NCX8	Fibronectin-like isoform X2	2.35249e+10	1.17168e+10	65131285118	33457655328	34.9616		3.49818e+08		4.84037e+08	4.16928e+08	28.6352		1477448214	350027642	1.81653e+09	1.21467e+09	30.1779		3.68555e+07	3.16015e+07	9.37326e+07	5.40632e+07	25.6881		1948413037	30.8597		5.31175e+09	2.7013e+09	2.61348e+09	3.54218e+09	31.722		3420428576	193121638	4382525132	2.66536e+09	31.3117		6255715439	1.09271e+10	1.32261e+10	1.01363e+10	33.2388		3.07244e+09	2.4096e+10
RXN16130.1	A0A498M6I9	Cytoplasmic 1	2.14782e+11	1.01718e+11	3.79829e+11	2.3211e+11	37.756		2.19126e+11		637926026248	4.28526e+11	38.6406		78324478573	1.49225e+10	268626778095	1.20625e+11	36.8117		26632324368	1.39061e+10	7.81642e+10	3.95675e+10	35.2036		23132073776	34.4292		2.06371e+11	279631705297	1.71315e+11	2.19106e+11	37.6728		4.25281e+11	28028285661	189136777465	2.14149e+11	37.6398		97570719333	66838126026	129264387355	9.78911e+10	36.5105		3.82817e+11	4.33123e+11
RXN14402.1	A0A498M4Q9	Transgelin	2.18305e+12	3.26462e+11	4.8422e+12	2.45057e+12	41.1563			2939520	35436283	1.91879e+07	24.1937		239020118		244908500	241964309	27.8502		49529651	4.29769e+07	1.82463e+07	3.69176e+07	25.1378		1.39079e+10	33.6952		14446201859	3820941788	7.25381e+09	8.50698e+09	32.986		291615003351	3869671656	90818444421	128767706476	36.906		15045337	1491421144		7.53233e+08	29.4885		9.59632e+08	2.98995e+10
RXN30539.1	A0A498N7Y8	Cytoplasmic 1	2234764032	514958000	983277160	1244333064	30.2127		3222397634	1.58734e+11	2466159372	5.48075e+10	35.6737				1117864240	1117864240	30.0581		692978932	102461286	148077420	3.14506e+08	28.2285		1.49504e+11	37.1214			3259773644	295004480	1777389062	30.7271		2288413696		4282250720	3285332208	31.6134		355760224		495163051	4.25462e+08	28.6645		42284100	782457748
RXN09093.1	A0A498LNC0	Calponin	4.55814e+11	2.23442e+11	688108531925	4.55788e+11	38.7296																				2.41074e+06	21.201		325008840		280577991	3.02793e+08	28.1738									88838792		88838792	26.4047
RXN11223.1	A0A498LUC6	Keratin 8	1.52183e+11	6.73936e+10	3.32416e+11	1.83998e+11	37.4209		4.18084e+10	3.57108e+09	13599767798	1.96597e+10	34.1945		5.90191e+10	9.48057e+09	116625079066	6.17083e+10	35.8447		1.19641e+10	1.12103e+10	1.89224e+10	1.40323e+10	33.708		1.32676e+11	36.9491		36543190669	6.81704e+10	4.44078e+10	4.97071e+10	35.5327		84689912179	5.42965e+09	9.02462e+10	6.01219e+10	35.8072		15545253233	3.13719e+10	1.97287e+10	2.22153e+10	34.3708		6.72947e+10	1.18607e+11
RXN09211.1	A0A498LMD3	Vinculin	2.90321e+10	15678751730	55867094346	3.3526e+10	34.9646		2.99205e+08	19686676	3.45678e+08	2.21523e+08	27.7229		629727762	44260392	3581387905	1.41846e+09	30.4017		2.52292e+08	115935038	2.32293e+08	2.00173e+08	27.5767		10479772361	33.2869		4.63984e+09	5492630773	1594150213	3.90887e+09	31.8641		12418446154	122152108	1.26944e+10	8.41166e+09	32.9697		1811561779	1.05106e+10	1.37412e+09	4.56542e+09	32.0881		2071675477	1.16579e+10
RXN08029.1	A0A498L6M3	Type I cytoskeletal 18-like protein	6.30332e+10	1.45018e+10	8.84714e+10	5.53354e+10	35.6875		273253243	159673244	1.89198e+08	2.07375e+08	27.6277		7.05982e+09	361966097	20500492065	9.30743e+09	33.1157		8.17559e+08	9.73704e+08	1.33157e+09	1.04094e+09	29.9552		1.15557e+10	33.4279		4674664547	6.20363e+09	4499127918	5.12581e+09	32.2551		11030862586	9963103	1.04001e+10	7.14697e+09	32.7347		1428840745	7.17628e+09	2262049721	3.62239e+09	31.7543		3.78724e+09	3.03594e+10
RXN24541.1	A0A498MVR9	Type I cytoskeletal 50 kDa-like protein	5.68698e+10	7591199210	95435142101	5.32987e+10	35.6334		503668043	67802738	1.75105e+08	2.48859e+08	27.8908		20400174608	848855554	37821506688	19690178950	34.1968		3.91964e+07	1.4204e+08	116839136	9.93585e+07	26.5661		1.84887e+10	34.1059		1.21495e+10	1.96389e+10	14545680529	1.54447e+10	33.8464		20032486462	2.79522e+08	2.47147e+10	1.50089e+10	33.8051		506087032	13006826946	1.13457e+09	4.8825e+09	32.185		8.1422e+08	9715045116
RXN20735.1	A0A498MVT8	Cochlin	1.12208e+11	2.52026e+11	128569806256	164267836499	37.2573		35860686			35860686	25.0959		1.99355e+10	3.95492e+09	41653801106	2.18481e+10	34.3468								9848380	23.2315		3.8619e+08		44991658	2.15591e+08	27.6837									69014406		69014406	26.0404		18079862	6267955872
RXN14770.1	A0A498M2L1	Collagen alpha-1(XII) chain-like isoform X1	9.20006e+09	6224332513	39773403471	1.83993e+10	34.0989		8.19274e+08	20972740	84063493	3.08103e+08	28.1988		2343977757	54051664	2373738742	1.59059e+09	30.5669		1.48832e+07		44940334	2.99118e+07	24.8342		3342365252	31.6382		5376563628	4.67099e+09	3812191339	4.61992e+09	32.1052		491300000	136618517	820335632	482751383	28.8467			4.68046e+07		4.68046e+07	25.4801		141196059	3.58067e+09
RXN23766.1	A0A498MZT6	Plastin-3	1.61404e+10	8.58607e+09	57072123081	2.72662e+10	34.6664		9.85401e+07	21607938	9.35535e+07	71233842	26.0861		1777535678	162041660	4913524018	2.28437e+09	31.0891		1.273e+08	1.52928e+07	2.78598e+08	1.40397e+08	27.0649		2108981935	30.9739		1877296244	2611427943	1123626181	1870783456	30.801		558720339	4.83712e+08	741869594	5.94767e+08	29.1478		242113373	432064773	123155832	2.65778e+08	27.9856		3.09775e+08	2.5599e+09
RXN39453.1	A0A498P5C9	Collagen alpha-3(VI) chain-like protein	1038799488	52709880	2044531136	1.04535e+09	29.9613								3110461376		12485968256	7798214816	32.8605			5833435		5833435	22.4759		38352580	25.1928		150932277		241574952	1.96254e+08	27.5481				22177982	22177982	24.4026				7.90218e+06	7.90218e+06	22.9138			203624496
RXN27874.1	A0A498N853	Transferrin variant C	3.07567e+10	22665312534	40814093382	3.1412e+10	34.8706		3.23371e+10	1798004346	4.39368e+10	2.6024e+10	34.5991		54824172182	25597793380	117113597386	6.58452e+10	35.9384		1.78168e+09	2.00107e+09	1983887702	1.92221e+09	30.8401		40373782884	35.2327		19338874816	3.38844e+10	4.7043e+09	1.93092e+10	34.1686		42875508643	14269272164	4.08004e+10	3.26484e+10	34.9263		1079170012453	95283460543	7.18943e+11	6.31132e+11	39.1992		3.25797e+10	2.21757e+11
RXN25550.1	A0A498MXP6	Annexin	58845779734	15084141799	78374576468	5.07682e+10	35.5632								6664278311			6664278311	32.6338												5078900982		5078900982	32.2419				9.22108e+09	9.22108e+09	33.1023
RXN18756.1	A0A498MIN9	Short transient receptor potential channel 4-like protein	25905509358	352520534	2.12981e+11	7.97463e+10	36.2147		8.3316e+08	10399121	1.05294e+09	6.32166e+08	29.2357		1.07614e+10	552004043	55793065908	2.23688e+10	34.3808								136044533	27.0195		1.64792e+09	1.0959e+09	1437619372	1.39381e+09	30.3764		2619552511	193025537	6.86622e+09	3.22626e+09	31.5872			50734477		50734477	25.5965		34480688	4.27015e+08
RXN24242.1	A0A498MXB9	Alpha-actinin-4 isoform X2	1.23343e+10	6631614010	28834091092	1.59333e+10	33.8913		9.61333e+09	1537999529	9.74729e+09	6.96621e+09	32.6977		4801308668	1.20656e+09	22380727400	9.46287e+09	33.1396		2.00611e+09	645483411	1.80324e+09	1.48495e+09	30.4678		17569645433	34.0324		15694356307	1.68933e+10	5.05479e+09	1.25475e+10	33.5467		53833200216	3892714061	44340629983	34022181420	34.9858		989056535	2175827739	2.48807e+09	1.88432e+09	30.8114		1.21714e+10	9384147150
RXN26180.1	A0A498MZD1	Serine beta-lactamase mitochondrial isoform X1	12021640318	5.85956e+10	21151807232	3.05897e+10	34.8323		27277631		49916529	38597080	25.202		1408486970	227939564	142519368	5.92982e+08	29.1434			2.59629e+07	8232681	1.70978e+07	24.0273		1.47217e+09	30.4553		6.78577e+08	3.39381e+08	1.54528e+09	8.54413e+08	29.6704		2494970384		2861295242	2678132813	31.3186			256724879		256724879	27.9356		9105928	9.32079e+08
RXN30122.1	A0A498NCY2	Filamin-C-like isoform X2	1.42417e+09	87037470	2.39243e+09	1301213665	30.2772		32835080		1.51724e+07	2.40038e+07	24.5168		2.64562e+08		254928466	2.59745e+08	27.9525			22507006		22507006	24.4239		2.30444e+09	31.1018		6.26674e+08	1.06209e+09	620223006	7.69661e+08	29.5196		2346698281	202798406	2033289575	1.5276e+09	30.5086		7.09745e+08	10841636574	2219655372	4.59035e+09	32.096
RXN05230.1	A0A498NRP5	Type I cytoskeletal 13-like protein	6.20125e+09	2845063884	1.46308e+10	7892365354	32.8778		4.76906e+07	131220508	3.51874e+07	7.13662e+07	26.0887		18349875884	878539213	38679077597	1.93025e+10	34.1681		57233368	1.76195e+08	125081560	1.19503e+08	26.8325		5.27229e+10	35.6177		20697913914	5.50723e+10	23801967655	3.31907e+10	34.9501		43980914670	66529218	4.71639e+10	3.04038e+10	34.8235			1.03234e+09	2.44119e+08	6.3823e+08	29.2495		4096891475	1.06604e+10
RXN38485.1	A0A498P2N6	Troponin cardiac muscle isoforms-like protein	1.24322e+10	1727952936	1.13949e+10	8.51835e+09	32.9879		661791532	198393840		430092686	28.6801			1396162086	927135128	1161648607	30.1135				6.30046e+06	6.30046e+06	22.587		171945588	27.3574		1901313180	1.62196e+09	7466621338	3.6633e+09	31.7705		71518206		9.6929e+09	4.88221e+09	32.1849								188582032
RXN28542.1	A0A498LB17	Tropomyosin alpha-3 chain isoform X6	1.7017e+11	7634893596	1.69814e+11	1.15873e+11	36.7538		2.12344e+08	4703814148	428117765	1.78143e+09	30.7304		7181218377	2313152696	8813441202	6.1026e+09	32.5068		3.50679e+08	6.03273e+08	1.00697e+09	6.53639e+08	29.2839		11194127418	33.382		1.12869e+10	16209238889	27120912399	1.82057e+10	34.0837		2920053062	452648127	3553029638	2.30858e+09	31.1044		22824660	234340833	2.13311e+08	1.56826e+08	27.2246		4100845169	2.66708e+09
RXN11824.1	A0A498LY90	Gamma-secretase subunit Aph-1b-like protein	39630632468	1724518402	35909201594	2.57548e+10	34.5841		9918947	22639046	40366751	24308248	24.5349		655416548	250962302	136911956	347763602	28.3735		11616791	3.4034e+07	161960521	6.92038e+07	26.0443		115892621	26.7882		1.45044e+08	2.86224e+09	7.46036e+08	1.25111e+09	30.2206		5630105638		9047747934	7338926786	32.7729									497771465
RXN13602.1	A0A498M278	Vitelline membrane outer layer 1-like protein	109121328629	11276993194	1.57429e+11	9.2609e+10	36.4304		1.01954e+10	50511320	393491053	3.54646e+09	31.7237		9766717356	5299427110	27301741436	14122628634	33.7173		9093432	8.52908e+07	17808124	3.73974e+07	25.1564		4055124158	31.9171		1.20169e+11	3.70744e+10	137388828273	9.82106e+10	36.5152		1.69888e+11	7.20445e+09	1.55833e+11	1.10975e+11	36.6914		1659777848	1022286809	582547729	1.0882e+09	30.0193		5.4477e+09	69727814568
RXN03250.1	A0A498L4F1	Glyceraldehyde-3-phosphate testis-specific	113715056722	9475525364	1.32013e+11	8.50678e+10	36.3079		99454959689	6.12842e+10	2.82565e+11	1.47768e+11	37.1045		6.64952e+09	10903204684	22827871800	1.34602e+10	33.648		2.09428e+08	6.62972e+07	509159312	2.61628e+08	27.9629		13477101899	33.6498		1.48728e+10	1.5213e+10	8012024564	1.26993e+10	33.564		18663684819	327113762	17439392424	1.21434e+10	33.4995		18332972305	2.46159e+09	38028064053	1.96075e+10	34.1907		8401491779	8948768572
RXN04124.1	A0A498LC85	F-box only 22-like protein	7137348656	7673689452	455731656	5.08892e+09	32.2447										49242360	49242360	25.5534								61311744	25.8697		673546930	2.03028e+08	1672881057	8.49819e+08	29.6626		47160603547	16370511	105494959594	5.08906e+10	35.5667			6596552		6596552	22.6533		21933852
RXN10677.1	A0A498LZY5	Phosphoglycerate kinase (EC 2.7.2.3)	13400611682	4.2092e+09	12421258160	1.00104e+10	33.2208		15633526798	16340799792	3.60395e+10	2.26713e+10	34.4001		4521295946	579307183	16302099323	7.13423e+09	32.7321		7.80219e+08	1.86734e+09	1568157052	1.40524e+09	30.3882		4237754992	31.9807		3747551769	6.21292e+09	1.23161e+09	3.7307e+09	31.7968		9069437227	182193322	5.56705e+09	4.93956e+09	32.2017		7282931699	2.8203e+10	11566173771	1.5684e+10	33.8686		9.14701e+09	2941898272
RXN28836.1	A0A498NCP9	Tubulin beta chain	1463673503	1.77178e+10	44756099976	2.13125e+10	34.311		680357150373	25048792980	3.54552e+10	2.46954e+11	37.8454		1912214272	1.80784e+10	6076946986	8.68918e+09	33.0166		1.25235e+09	941184289	4.09002e+09	2094516475	30.964		34173664431	34.9922		15142288164	30681269867	8.03155e+08	1.55422e+10	33.8555		74782283846	5.57045e+09	3.06497e+10	3.70008e+10	35.1068		35735518214	3545185032	1485390413	1.35887e+10	33.6617		33041820702	6.63884e+09
RXN32036.1	A0A498NJQ3	Annexin	3.86569e+10	5773144764	32502264896	2.56441e+10	34.5779		85492412	9345908	18558465	3.77989e+07	25.1718		1445193312	722447644	1.02082e+09	1.06282e+09	29.9852		5.19528e+08	407932900	7.9456e+08	574007038	29.0965		4347792512	32.0176		3.71515e+09	4695418201	7.29082e+09	5.23379e+09	32.2852		2924754270		3168105294	3046429782	31.5045		108319959	1504885132	396791503	6.69999e+08	29.3196		1222719735	6816054183
RXN23396.1	A0A498MYQ5	Troponin cardiac muscle isoforms-like protein	5287636972	2340192582	5530047336	4.38596e+09	32.0302																				158869112	27.2433		127255471			127255471	26.9232		1.53023e+09	5.9778e+07	120094138	570034559	29.0865
RXN11713.1	A0A498LVR7	Basement membrane-specific heparan sulfate proteoglycan core-like protein	2528080281	525627424	6394219975	3.14931e+09	31.5524		6.98121e+08		237150204	4.67636e+08	28.8008		455266780	239571798	145425312	2.80088e+08	28.0613		2.18489e+08	2.49926e+09	1.06254e+08	9.41333e+08	29.8101		1537368193	30.5178		5.8386e+08	422141972	1.60947e+08	388983107	28.5351		2.03668e+09	287641338	3.54205e+09	1.95546e+09	30.8649			300734465	3.61429e+07	1.68439e+08	27.3276		1.84241e+08	1.22586e+09
RXN05680.1	A0A498LBQ1	Tubulin beta chain	470945538	265602291	4823550488	1.85337e+09	30.7875		15600808612	5750859154	7.58361e+11	2.59904e+11	37.9192		67583989688	384334952	4581010980	2.41831e+10	34.4933								659476826	29.2967		223554551	967099016	17658670767	6.28311e+09	32.5488		5661543726		454205620	3057874673	31.5099		831132592		710378437	7.70756e+08	29.5217			35667704330
RXN08459.1	A0A498LJB6	Beta-enolase	1.19623e+10	10647662560	1.90122e+10	13874061111	33.6917		9.08513e+09	2699195627	3.23892e+09	5.00775e+09	32.2215		25155754994	6.96622e+08	23427186382	1.64265e+10	33.9353		2.0015e+09	2502288692	2.8038e+09	2.43586e+09	31.1818		6685842748	32.6385		1.07365e+10	1.06374e+10	4.18188e+09	8.51862e+09	32.988		2.59338e+10	2.53622e+09	1.66378e+10	1.5036e+10	33.8077		8800067410	33382439427	10668567483	1.7617e+10	34.0363		12283501779	3007152563
RXN28142.1	A0A498N8T4	Triosephosphate isomerase (EC 5.3.1.1)	2.64425e+10	15603858183	4.68558e+10	2.96341e+10	34.7865		1.60211e+10	49490691174	2.5462e+10	3.03246e+10	34.8198		2928416439	6781595171	11634188142	7.11473e+09	32.7282		3.36577e+08	1.8325e+09	8.84002e+07	752491942	29.4871		12799875072	33.5754		3.62631e+10	1.187e+10	1.52626e+10	2.11319e+10	34.2987		12973535134	1390439198	55993497433	2.34525e+10	34.449		3582143167	22243474349	6.44226e+09	1.0756e+10	33.3244		9.705e+09	5.03474e+09
RXN17738.1	A0A498M9M2	Decorin (Bone proteoglycan II)	34790980592	1.04967e+10	62368367409	3.58853e+10	35.0627		2.6567e+09		97856948	1.37728e+09	30.3592		2.28083e+10	5660271631	50263082549	2.62439e+10	34.6113		1.90021e+08	1.04897e+08	266692239	1.87204e+08	27.48		8734389396	33.0241		4234769104	3.05647e+09	2816339722	3.36919e+09	31.6498		10658559156		9711532860	10185046008	33.2457		95417126	825371252	5.12015e+08	4.77601e+08	28.8312		203289373	15497824540
RXN23886.1	A0A498N052	Tubulin alpha chain	3061440956	2732802248	34193904820	1.33294e+10	33.6339		1.91267e+10	4595990184	35145898132	1.96229e+10	34.1918		5666070065	1177329752	115226789157	4.06901e+10	35.244		3.89789e+09	4.24362e+08	4.78991e+09	3.03739e+09	31.5002		3.47211e+10	35.0151			22428482359	16857529849	19643006104	34.1933		9508381930	1089784838	7012662122	5.87028e+09	32.4508		9267413110	17444661582	10163487858	1.22919e+10	33.517		1.73987e+10	2250640003
RXN10058.1	A0A498LNN2	Tubulin alpha-1C chain	1.55449e+10	13493198583	3327622239	1.07886e+10	33.3288		6.65072e+11	153812049962		4.09442e+11	38.5749		64078709064	1.89123e+10	24382193862	3.57911e+10	35.0589		3.29128e+08	6.06693e+07	393816448	2.61205e+08	27.9606		1277391710	30.2506		238782074	632757762	282113812	384551216	28.5186		72686849026	5.48483e+09	2.95527e+10	3.59081e+10	35.0636		56899403116	406187354	90389230789	4.92316e+10	35.5189		958522810	3.40359e+10
RXN35236.1	A0A498NU79	Neuroblast differentiation-associated AHNAK isoform X1	1690487434	5252064655	822098976	2.58822e+09	31.2693		2.66808e+08		45968343	1.56388e+08	27.2206		6.05475e+08	125630706	1531072377	7.54059e+08	29.4901		500442096	1.14924e+08	1.3845e+08	2.51272e+08	27.9047		2.00614e+09	30.9018		4.12691e+08	2.80149e+09	1.8314e+08	1.13244e+09	30.0768		641127632		1075811174	858469403	29.6772			3239383539	216211017	1727797278	30.6863		2.11364e+08	6.899e+09
RXN20479.1	A0A498LE46	Tropomyosin alpha-1 chain isoform X2	703626816	24279783834	22853025248	1.59455e+10	33.8924		27486768			27486768	24.7122		124173920			124173920	26.8878			11100322	14997362	13048842	23.6374		2732858412	31.3478		77692538	1079864459	181011930	4.4619e+08	28.7331		864503744		2337160016	1600831880	30.5762		270138421	6.18733e+10	6.13658e+09	2.276e+10	34.4058		40127876	1.38148e+10
RXN12559.1	A0A498LVS6	Annexin	5.34167e+09	2.7168e+09	15567467196	7.87531e+09	32.8747		1.67228e+09	102483141	8.02855e+08	859206929	29.6784		889234410	19050652	2808931348	1.23907e+09	30.2066		5755679		1.21129e+07	8.93431e+06	23.0909		1.36542e+09	30.3467		4.22972e+08	144564485	4.077e+08	325078947	28.2762		1.38914e+10	172894770	7582084978	7.21548e+09	32.7484		773055112	1615656130	1.21426e+09	1.20099e+09	30.1616			6.90608e+08
RXN04602.1	A0A498L8Q3	Histone H4	5.58724e+10	2.46504e+10	1.15455e+11	6.53259e+10	35.9269			1.08319e+11	95871553170	1.02095e+11	36.5711		7422278926	10680005146	9733903700	9.27873e+09	33.1113			1.47765e+09	1.77553e+09	1.62659e+09	30.5992		209569278836	37.6086		1.22034e+11	1.91245e+11	3.9152e+11	2.34933e+11	37.7735		2.41076e+11	8381499957	171346272488	1.40268e+11	37.0294		53594285104	43744379097	4.4208e+11	1.79806e+11	37.3877			162642839455
RXN12929.1	A0A498LWN5	Spectrin alpha non-erythrocytic 1 isoform X4	732454658	2.06993e+09	1201826429	1.33474e+09	30.3139		3.94626e+10	6.34918e+09	3.84088e+10	2.80735e+10	34.7085		9.62483e+09	2.11165e+09	2.1207e+10	1.09812e+10	33.3543		1.16544e+08	2.23537e+08	3.57251e+08	2.32444e+08	27.7923		5.07009e+09	32.2394		2399905326	4533057028	1.97942e+09	2.97079e+09	31.4682		1.70525e+10	18175944	2.39905e+09	6.48992e+09	32.5956		3.31195e+10	1.72474e+10	4.13946e+10	3.05871e+10	34.8322		3.28289e+09	8.85727e+09
RXN09331.1	A0A498LMQ3	Enolase isoform X1	2814262091	3.37479e+09	4226201602	3.47175e+09	31.693		6.66927e+10	45372675548	1.1604e+11	7.6035e+10	36.1459		11991097774	3.73646e+09	48862633756	2.15301e+10	34.3256		88151944	30835672	7.88208e+06	4.22899e+07	25.3338		5752007444	32.4214		2107142222	3.67628e+09	1333573799	2.37233e+09	31.1437		10804017456	273672442	5434065484	5.50392e+09	32.3578		15456734230	10655584196	2.08029e+10	1.56384e+10	33.8644		3.13654e+09	9.35802e+09
RXN14294.1	A0A498M530	Tubulin beta chain	95717918	133043660	312313676	180358418	27.4263		3.28925e+10	4382286704	32584466910	2.32864e+10	34.4388			155823782	2256790652	1206307217	30.168				14136793	14136793	23.753					9850528			9850528	23.2318		98841740	82966720		90904230	26.4378		290163432		2059727898	1174945665	30.1299			436529770
RXN26218.1	A0A498MWD6	Collagen alpha-2(I) chain-like protein	42752463490	181576330921	4.39884e+10	8.94391e+10	36.3802		1.44701e+10	89644352	1778731680	5.44615e+09	32.3426		154576245860	1.51596e+10	248060580479	1.39265e+11	37.019		1.37424e+09	3.88022e+08	2.89307e+08	6.83856e+08	29.3491		13158878659	33.6153		3074069963	11712827480	3359025034	6.04864e+09	32.494		2419249343	1051233463	3.06584e+10	1.13763e+10	33.4053		1167704896	6849950707	1292277636	3.10331e+09	31.5312		5401892982	2.45073e+11
RXN25137.1	A0A498N908	Tropomyosin alpha-1 chain-like isoform X1	1751537694	5615482576	1835221122	3.06741e+09	31.5144		6.8127e+08	27176692	1.18478e+09	631076918	29.2332		201318912	219454410	125384680	1.82053e+08	27.4398		65451426	6.72002e+06	65790812	4.59874e+07	25.4547		2049777656	30.9328		1577386165	1.87047e+09	2.36037e+09	1.93608e+09	30.8505		1835950888	41383976	448706572	7.75347e+08	29.5303		1431244692		1849079943	1.64016e+09	30.6112		1099730305	1813215230
RXN35232.1	A0A498NSX2	Neuroblast differentiation-associated AHNAK isoform X1	619906377	2490776053	2321157226	1.81061e+09	30.7538		4.57771e+08		2.8463e+08	371200686	28.4676		1181549433		3009968449	2095758941	30.9648		3.8601e+08	6.96718e+08	5.64137e+08	5.48955e+08	29.0321		1662662411	30.6308		6.28856e+08	1.70881e+09	4.01948e+08	9.13204e+08	29.7664		90939750	8595801	1.47423e+07	3.80926e+07	25.183		217017558	2.92983e+09	1.53308e+09	1.55998e+09	30.5389		105782386	5.21607e+09
RXN34114.1	A0A498NRE8	Fructose-1,6-bisphosphatase isozyme 2-like isoform X2	6192415115	5766518333	5563813676	5840915708	32.4435		9.89512e+06	44381916		2.71385e+07	24.6938																	54758803		35435212	4.5097e+07	25.4265		347238618		631715868	489477243	28.8667
RXN07968.1	A0A498LI11	Heat shock cognate 71 kDa	4.68648e+09	3.11553e+08	15378099358	6792045013	32.6612		1433414306	58571968	1.27847e+09	9.23486e+08	29.7825		41515632		349581610	195548621	27.543		20965569	4006951	35635477	2.02027e+07	24.268		49258919	25.5539		3.43264e+07	18677665		2.6502e+07	24.6596		743830397		466898892	6.05365e+08	29.1732		127480801	6286894	220398479	1.18055e+08	26.8149			540652916
RXN34307.1	A0A498NRY6	Tryptophan 2,3-dioxygenase (TDO) (EC 1.13.11.11) (Tryptamin 2,3-dioxygenase) (Tryptophan oxygenase) (TO) (TRPO) (Tryptophan pyrrolase) (Tryptophanase)	8287648481	13502813230	63169724083	2.83201e+10	34.7211		5.31294e+09	27621232	859333100	2.06663e+09	30.9446		35720715332	7.19575e+09	127256642977	5.67244e+10	35.7232		5.50014e+08	7.28949e+07	5.48542e+08	3.90484e+08	28.5407		22580367691	34.3943		7487146101	14648631375	8.75068e+09	1.02955e+10	33.2613		40534489704	5901456764	77991698333	4.14759e+10	35.2716		1642578228	8809570057	1.65274e+09	4.03496e+09	31.9099		7599896390	69065160848
RXN32623.1	A0A498LY83	Serpin H1-like protein	3515399758	132129843	7365016997	3670848866	31.7735								46742144		125429058	86085601	26.3593		2700123	9.84815e+06	19832428	1.07936e+07	23.3637		24663942	24.5559		1.76172e+08	2.24213e+08	6.49188e+08	3.49857e+08	28.3822		212959235		394784595	303871915	28.1789		127223612	14766350	107232920	83074294	26.3079		9386388	6.80327e+08
RXN26922.1	A0A498NKF8	Gelsolin-like isoform X2	9.5881e+09	4538143040	32739201924	1.56218e+10	33.8628		2.63836e+09	184340318	2.47964e+09	1.76745e+09	30.719		1375759753	395621371	8740934935	3504105353	31.7064		291673671	35250744	271515789	199480068	27.5717		1272685025	30.2452		755721840	1051031688	424353987	743702505	29.4702		4834326777		5194782512	5.01455e+09	32.2235		430278018	697044725	1689997092	9.39107e+08	29.8067		6.81899e+08	2.36801e+09
RXN13692.1	A0A498M2I1	T-cell activation Rho GTPase-activating-like isoform X1	2.1577e+09	1709834860	6784337237	3.55063e+09	31.7254		2180609884	224405712	2263474756	1.55616e+09	30.5353		1663456052	344009998	7.96288e+09	3.32345e+09	31.63		1.73204e+08	1.59766e+07	3.16409e+08	1.6853e+08	27.3284		3253384592	31.5993		2.2465e+09	3856220405	1.18425e+09	2.42899e+09	31.1777		1605136490		1.12715e+09	1.36614e+09	30.3475		5901935292	6.75175e+09	8354312283	7.00267e+09	32.7053		3.89761e+09	5.29473e+09
RXN34636.1	A0A498LA53	Type I cytoskeletal 13-like protein	9.80145e+08	460426902	2304948768	1.24851e+09	30.2176		10769221	10535370		1.06523e+07	23.3447		180582347		372112448	2.76347e+08	28.0419		3.44854e+07	22036523	4.38922e+07	3.34714e+07	24.9964		1.572e+10	33.8719		9.62697e+09	12937445662	5.43845e+09	9.33429e+09	33.1199		26901546147	3.94021e+09	28602685676	1.98148e+10	34.2059		40185280	315217556	73400050	1.42934e+08	27.0908		1723609990	1783285688
RXN32238.1	A0A498NK49	Collagen alpha-1(XII) chain-like protein	793019443	9.66949e+09	2433856986	4.29879e+09	32.0013		23096427			23096427	24.4612		10603480886	8.41285e+08	1.87101e+10	1.00516e+10	33.2267		1.05893e+08	3.79427e+07	5.01174e+08	2.15003e+08	27.6798		20204775055	34.234		1.92803e+09	1.81898e+09	1.58888e+09	1.77863e+09	30.7281		13352585928	318575051	16343645550	1.00049e+10	33.22			33923226		33923226	25.0158			2.18424e+09
RXN31563.1	A0A498NI70	Tenascin-like isoform X1	2414239220	3.41528e+09	7442682116	4.42407e+09	32.0427		10477808		11632291	1.1055e+07	23.3982														1.50764e+08	27.1677		1.7417e+08		8620626	9.13952e+07	26.4456		823508383	465001584	2.80061e+09	1.36304e+09	30.3442									326886987
RXN10923.1	A0A498LTI4	Heat shock cognate 71 kDa	239140976	4562581652	227041253	1676254627	30.6426		4.29285e+10	13669095137	48141291531	3.4913e+10	35.023		11129445950	3.81789e+09	28926434923	1.46246e+10	33.7677		7.96211e+09	5.60948e+09	12579700121	8.71709e+09	33.0212		21291431218	34.3096		9.32562e+09	1.43583e+10	4864895588	9.51627e+09	33.1477		26659784767	1037499561	9850367768	12515884032	33.543		16491023108	1.26085e+10	19776501424	1.6292e+10	33.9234		1.61201e+10	12247218253
RXN34306.1	A0A498NR97	Phosphorylase b kinase regulatory subunit	8.88262e+09	13227608406	42019900674	2.13767e+10	34.3153		6714873981	68905650	922283382	2568687671	31.2584		2.39857e+10	5.59115e+09	123644662243	5.10738e+10	35.5719		7.05922e+08	1.33377e+08	9.09556e+08	5.82952e+08	29.1188		21973841284	34.3551		6.35048e+09	1.20654e+10	10401359874	9.60575e+09	33.1613		27402194986	4823490083	92388969998	4.15382e+10	35.2737		1990297088	8825355472	966350647	3.92733e+09	31.8709		8465032262	8.11457e+10
RXN30067.1	A0A498NFF7	Glucose-6-phosphate isomerase (EC 5.3.1.9)	2.17469e+09	2095284856	7433868071	3.90128e+09	31.8613		15623465721	3.83611e+08	1.73263e+10	1.11111e+10	33.3713		1873817650	129212654	3021300405	1674776903	30.6413		8.01244e+08	7.63729e+08	1.24132e+09	9.35433e+08	29.8011		1487599905	30.4703		446017868	874401152	137080376	485833132	28.8559		3.65883e+09	300129687	2296466658	2.08514e+09	30.9575		2513446219	3253240157	3.53762e+09	3.10143e+09	31.5303		1.84983e+09	1.2621e+09
RXN05257.1	A0A498LHR2	Transgelin	6.45934e+09	2558897065	13470645992	7.4963e+09	32.8035			26871268		26871268	24.6796														880538002	29.7138		1302023413	2.8086e+09	2073304695	2.06131e+09	30.9409		2581451054	25749766	1539547028	1.38225e+09	30.3644			7.67707e+08	74903437	4.21305e+08	28.6503		468127649	960150085
RXN18408.1	A0A498MBC1	Phosphoglucomutase 5	5075459477	4074772973	13398429200	7516220550	32.8074										58779472	58779472	25.8088				6.81538e+06	6.81538e+06	22.7004		1053684362	29.9728		1.4929e+08	1.05708e+08	3.93396e+07	9.81126e+07	26.5479		9.72355e+09	505147570	1.22598e+10	7.49618e+09	32.8035		60957525	52881272	200694174	1.04844e+08	26.6437			1637863062
RXN15989.1	A0A498M537	Annexin	8273327266	1770987656	7460760542	5.83503e+09	32.4421		202758214	126060587	2.70838e+08	1.99886e+08	27.5746		372085578	2.69861e+08	552782910	3.98243e+08	28.5691		5.79964e+08	4.15899e+08	786371043	5.94078e+08	29.1461		2.98111e+11	38.1171		1428270342	2.07422e+09	4.11259e+09	2538360548	31.2412		5735736560	3691257726	8.35908e+09	5.92869e+09	32.4651		1376860236	1560609595	2.78994e+09	1.90914e+09	30.8303		10665980238	2.85598e+09
RXN17799.1	A0A498M9R8	Inosine-5'-monophosphate dehydrogenase (IMP dehydrogenase) (IMPD) (IMPDH) (EC 1.1.1.205)	4.41135e+09	7.98657e+08	1.20063e+10	5.73877e+09	32.4181		1.46818e+08		173150340	1.59984e+08	27.2534		137406346		594811840	366109093	28.4477		1.79931e+07	107250613	2.13265e+07	48856722	25.5421					2.37226e+08	8.23242e+07	1.38699e+08	1.52749e+08	27.1866		5445653		90417382	4.79315e+07	25.5145		12073190		4860401	8.4668e+06	23.0134		1.64362e+07	1.10603e+08
RXN31887.1	A0A498NJQ6	ATP synthase subunit beta (EC 7.1.2.2)	3112188979	3975439257	9628783797	5.57214e+09	32.3756		73876404339	4.78949e+10	1.01565e+11	7.44455e+10	36.1155		46998872648	6807494224	6.79569e+10	4.05877e+10	35.2403		3.81068e+10	3.83211e+10	5.38786e+10	4.34355e+10	35.3382		47431522461	35.4651		1.60441e+10	2.31788e+10	2.02418e+10	1.98216e+10	34.2064		39343916446	1.76409e+09	4.41901e+10	2.84327e+10	34.7268		24159263471	146916382247	29257246010	66777630576	35.9586		7.97739e+10	1.4595e+10
RXN18438.1	A0A498MBE9	Kelch 12	462543044	386302478	2696777012	1181874178	30.1384		352884918		4.70257e+08	4.11571e+08	28.6166		484642602		1.1457e+09	8.15173e+08	29.6025								4848034185	32.1748		3555873317	1962052025	1942467835	2.4868e+09	31.2116		3034241562	668953184	6384590692	3362595146	31.6469		370741152	203940332	9.50348e+08	5.08343e+08	28.9212			1310202606
RXN33459.1	A0A498NNZ4	Desmin-like protein	4058764440	539724625	12093888543	5.56413e+09	32.3735		6.81875e+08		44234086	3.63054e+08	28.4356		2805105253	129865584	4469428302	2.46813e+09	31.2008		4.60704e+08	980475389	9.13106e+08	7.84762e+08	29.5477		17165312336	33.9988		721375794	869046860	2655781049	1.4154e+09	30.3986		2.00293e+11	2555139897	2.76015e+11	159620866991	37.2159		22387521121	45811846235	3.16671e+10	3.32888e+10	34.9543		52709678	226950521
RXN23220.1	A0A498MRY7	Tensin-1 isoform X3	2.25708e+09	4.1509e+08	3680912761	2.11769e+09	30.9798		8918919			8918919	23.0884										3.32259e+06	3.32259e+06	21.6639		65295790	25.9605		7.34903e+07	193772941	180667192	1.4931e+08	27.1537		368151180		434003384	401077282	28.5793			701528657		701528657	29.3859			3.86237e+08
RXN31002.1	A0A498NGM2	ATP synthase subunit alpha	2624009967	3503920601	7350448443	4.49279e+09	32.065		9.48658e+10	28238789085	1.12888e+11	78664309960	36.195		40043379721	6.05714e+09	6.16042e+10	3.59016e+10	35.0633		34478345480	2.58281e+10	4.78259e+10	3.60441e+10	35.069		45391387654	35.4017		1.75142e+10	1.98367e+10	2.06549e+10	1.93353e+10	34.1705		2.80737e+10	2272872932	35529797962	2.19588e+10	34.3541		31221779886	121940315613	47633197529	6.69318e+10	35.962		5.88628e+10	10760955111
RXN24798.1	A0A498MSZ6	Creatine kinase B-type	4.65414e+09	3.24257e+09	9824222723	5906976594	32.4598		5.39633e+08	211955460	825516278	5.25701e+08	28.9697		2.65718e+08	17111258	889252584	3.90694e+08	28.5415		562796161	2.87143e+09	9.8196e+08	1472062112	30.4552		3.31394e+10	34.9478		4.68065e+08	1699411719	468820234	8.78766e+08	29.7109		45803422073	1736319046	4.71712e+10	3.15703e+10	34.8778		57800316	162026616	1.15272e+08	1.117e+08	26.735		1.20773e+09	3140590710
RXN10465.1	A0A498LYI7	Glyceraldehyde-3-phosphate dehydrogenase	4887142123	3.32324e+09	5918519058	4.70963e+09	32.133		2.6547e+10	6.70404e+09	2.25403e+09	1.1835e+10	33.4623		13880735060	8.53517e+09	13314817634	1.19102e+10	33.4715		1.47219e+10	1.81057e+10	2.38661e+10	1.88979e+10	34.1375		1.36479e+10	33.668		2.60937e+10	17044584166	1.25213e+10	1.85532e+10	34.1109		4.32255e+10	2615291248	64795626795	3.68788e+10	35.1021		39212830589	108331984262	93240111558	8.02616e+10	36.224		2.24667e+10	8515708682
RXN05281.1	A0A498LAB9	Peptidyl-prolyl cis-trans isomerase (PPIase) (EC 5.2.1.8)	19210755524	8276536165	30324171898	1.92705e+10	34.1657		1.59291e+09	2753901576	3.98577e+09	2.77753e+09	31.3712		367792752	94943878	429865014	2.97534e+08	28.1485		1897811246	3.72387e+09	1215872338	2.27918e+09	31.0859		5966597071	32.4743		5605965980	2.82217e+09	6113516427	4.84722e+09	32.1745		2814652099	1.01371e+09	3667171834	2.49851e+09	31.2184		920027475	1736799004	1103165638	1.25333e+09	30.2231		2848635725	1.58756e+09
RXN04616.1	A0A498LCG9	Lipoma-preferred partner-like protein	1929591910	5.97681e+08	4.45675e+09	2.32801e+09	31.1164														5420879		19761874	1.25914e+07	23.5859																								1.29582e+09
RXN12433.1	A0A498LY02	Profilin	29642566840	1.70895e+10	77629816523	4.14539e+10	35.2708		9.94234e+07	7.83629e+08	276766049	3.86606e+08	28.5263		61037980	111135428	490016908	2.2073e+08	27.7177		40109201	2.34039e+08	2.25798e+07	9.89092e+07	26.5596		4.01295e+10	35.2239		3.95389e+09	3572399345	2370316500	3.29887e+09	31.6193		1.24997e+10	578793444	1.03003e+10	7792948381	32.8595		48233480		97437803	7.28356e+07	26.1181		2.53277e+09	7.79168e+08
RXN12838.1	A0A498LWD3	Tetratricopeptide repeat 25	3.05449e+09	827100775	9.82098e+09	4.56752e+09	32.0888		2715943104	43151923	2.62885e+09	1.79598e+09	30.7421		621166159	43134132	1814288942	826196411	29.6219		5.51379e+08	7.40904e+08	7.21865e+08	6.71382e+08	29.3226		8.83563e+08	29.7188		885209166	7.30769e+08	187837503	6.01272e+08	29.1634		8.46318e+08		978481933	9.124e+08	29.7651		593286022	169354570	7.02949e+08	4.8853e+08	28.8639			1.08605e+09
RXN09456.1	A0A498LQS3	Collagen alpha-6(VI) chain-like protein	839171443	1.55791e+09	3668917865	2.022e+09	30.9131		2.00023e+09		5.4152e+07	1.02719e+09	29.9361		32497968098	6.45092e+09	85658251034	4.15357e+10	35.2736								1.52826e+10	33.8312		4.55384e+09	4.82616e+09	3.34083e+09	4.24028e+09	31.9815		25882653540	3.20122e+09	5.32072e+10	27430367180	34.6751				5728999	5728999	22.4499		3.10656e+09	6.51939e+10
RXN29941.1	A0A498NA67	Tubulin alpha chain	8654148	100963646	2279734490	7.96451e+08	29.569		594595225	17596118	399048251	3.3708e+08	28.3285		337243816		166889580	252066698	27.9092								1634644186	30.6063		166755501	127430426	295460266	196548731	27.5503		1613056107	8.64098e+07	976492813	8.91986e+08	29.7324		11222984	433643707		2.22433e+08	27.7288		5.79639e+08	4577421
RXN10247.1	A0A498LYK8	14-3-3 beta alpha-A-like protein	4865356983	463899200	13030840614	6.12003e+09	32.5109		2.84806e+09	5226769217	6513493478	4.86277e+09	32.1791		406546984	589397460	2091447253	1.02913e+09	29.9388		7.25488e+08	2.27901e+08	6.26018e+08	5.26469e+08	28.9718		2291886680	31.0939		1726667304	2985975920	2514365633	2.409e+09	31.1658		2917618409	110379642	1382405274	1.47013e+09	30.4533		410496638	1327168505	6.19081e+08	7.85582e+08	29.5492		2.10269e+09	1.17071e+09
RXN15677.1	A0A498MF85	Four and a half LIM domains 2	8564412065	823912975	6.10605e+09	5.16479e+09	32.2661								24790350	511955552	39865212	1.92204e+08	27.5181		10823166	1.26727e+07	32199383	1.85651e+07	24.1461		537923548	29.0028		277912067	192860804	1098762835	5.23179e+08	28.9627		21185200	11254061	487736341	1.73392e+08	27.3695			345379544	30257388	187818466	27.4848			311098988
RXN22752.1	A0A498MT06	Hemoglobin subunit beta-like protein	102550350033	393140472902	245571125964	2.47087e+11	37.8462		125407769031	1.05687e+11	686518950492	3.05871e+11	38.1541		63931469688	60149176565	142372580458	88817742237	36.3701		5.03748e+07	5.44026e+07	250279306	1.18352e+08	26.8185		5.19531e+11	38.9184		5.68325e+11	8.44966e+11	4.08146e+11	6.07146e+11	39.1433		1.09504e+11	31373225572	8.61727e+10	7.56833e+10	36.1393		4060162975759	1605252719424	7.89367e+12	4.51969e+12	42.0394		854246987593	1.42697e+12
RXN14339.1	A0A498M0I3	Fructose-bisphosphate aldolase (EC 4.1.2.13)	6720121400	5900265040	7572282192	6730889544	32.6482		7.18812e+10	3.49707e+10	1.77614e+11	9.48221e+10	36.4645		7917525731	1341666790	17214925949	8.82471e+09	33.0389		2.58893e+08	655413749	579485040	4.97931e+08	28.8914		7623267764	32.8278		2.21987e+09	2.86035e+09	898555141	1.99293e+09	30.8922		1118303005	10216341	2175325392	1.10128e+09	30.0365		4814580602	3166350651	20660635978	9547189077	33.1524		1922719227	2492449010
RXN29772.1	A0A498NCC7	Chloride intracellular channel protein	4207732772	250278809	4720731394	3.05958e+09	31.5107		9000613		19062016	1.40313e+07	23.7421														109854340	26.711		53867912	9974240	68286740	44042964	25.3924		278109052		347712983	3.12911e+08	28.2212			294857670		294857670	28.1354		227975476	1.42898e+08
RXN17745.1	A0A498MKB6	L-lactate dehydrogenase (EC 1.1.1.27)	1.0748e+10	1684194654	11403076199	7.94509e+09	32.8874		44497002917	23922536832	99620436696	5.60133e+10	35.7051		10272323060	7.78169e+09	6219670174	8.09123e+09	32.9137		3.9184e+09	2193146058	6903893629	4.33848e+09	32.0145		8113042366	32.9176		1.50538e+10	12923021008	16192290397	1.4723e+10	33.7774		22857741082	1.48633e+09	2.5058e+10	1.64673e+10	33.9389		55791794170	88738235012	81835530670	7.54552e+10	36.1349		36117585496	5696073346
RXN17737.1	A0A498ML95	Lumican	34790189644	39746264343	51680036072	42072163353	35.2921		315458853		107919690	2.11689e+08	27.6574		10158508889	2212114284	40090039077	1.74869e+10	34.0256		12967114	1.11806e+08	60767897	6.18469e+07	25.8822		24124516255	34.4898		3045535949	3.21287e+09	3327215203	3.19521e+09	31.5733		882365502		7582354298	4232359900	31.9788		1196114550	3397789677	1280334526	1.95808e+09	30.8668		609830919	19917936437
RXN33313.1	A0A498NN34	Elongation factor 2	1489822185	1.90393e+09	3403348913	2.2657e+09	31.0773		7.3341e+09	823180512	11839521481	6.6656e+09	32.6341		3.47333e+09	913727165	17997043219	7.46137e+09	32.7968		2.04864e+10	2.20128e+09	12797264450	1.18283e+10	33.4615		10528613632	33.2936		9.64003e+09	8.79163e+09	6869440173	8.4337e+09	32.9735		7789311058	9.70069e+08	8179951189	5.64644e+09	32.3947		5815340595	3.0407e+09	6680253761	5.17876e+09	32.27		9.62557e+09	5444313660
RXN23366.1	A0A498MDR7	Protein disulfide-isomerase (EC 5.3.4.1)	1304804707	1.9535e+09	3664786574	2.3077e+09	31.1038		2.67919e+09	365209506	4.04723e+09	2.36388e+09	31.1385		3124015529	9.06093e+07	5605575682	2.94007e+09	31.4532		3666642616	6.46354e+09	5815815588	5.31533e+09	32.3075		7975711383	32.893		8.26357e+09	10320004943	7.19689e+09	8.59349e+09	33.0006		5928216210	77011624	7423922639	4476383491	32.0597		5.18971e+09	3361707923	6.65155e+09	5.06765e+09	32.2387		4.21533e+09	5.29695e+09
RXN02396.1	A0A498LWK8	Intermediate filament ON3-like isoform X2	3.82577e+09	3014213300	1.14866e+10	6.10885e+09	32.5083		4.62344e+09	19882391	2.8818e+09	2508374150	31.2241		20280407492	2.71736e+09	57092364434	2.66967e+10	34.6359		352572498	251322213	6.05968e+08	4.03288e+08	28.5872		3.86343e+10	35.1692		1.87283e+10	41360795374	17446790825	2.58453e+10	34.5892		14360563146	3.99176e+08	21749986311	1.21699e+10	33.5026		917344594	2.47652e+09	1796279893	1.73005e+09	30.6882		3.97362e+09	6.68471e+09
RXN32123.1	A0A498NJS6	Adapter molecule crk	8775917122	3.13545e+09	13444940912	8.4521e+09	32.9767								802380505	766130510		7.84256e+08	29.5467		2.52513e+08	2.43091e+07	5.7398e+08	2.83601e+08	28.0793		10857745118	33.338		1000967325	5.43026e+09	4964024180	3.79842e+09	31.8228		80100384	60290540	2556215441	8.98869e+08	29.7435		244901648	1.3716e+09	3004323451	1.54027e+09	30.5205		3.40352e+09	6628847369
RXN27133.1	A0A498N4K0	Glutamine gamma-glutamyltransferase	3163565980	868152122	6949811112	3660509738	31.7694		1.79539e+07		8.67013e+06	1.3312e+07	23.6662		96795985		188751276	1.42774e+08	27.0892				1.50363e+07	1.50363e+07	23.8419		4800292990	32.1605		5.25832e+08	4.83636e+08	6.5686e+08	5.55443e+08	29.0491		2603668852	3.82879e+08	4202796324	2.39645e+09	31.1583		803907194	2523584004	1071316456	1466269218	30.4495		1.60503e+08	267200353
RXN26272.1	A0A498N372	Elongation factor 1-alpha	7604447399	8216053778	1.82407e+10	1.13537e+10	33.4024		17149198298	1198508447	1.98261e+10	1.27246e+10	33.5669		9824307018	2.40036e+09	26238002193	1.28209e+10	33.5778		1.78988e+10	1.43156e+10	24417782901	18877376499	34.1359		3.15918e+10	34.8788		1.62149e+10	2.54941e+10	1.65853e+10	1.94314e+10	34.1777		34878636182	4065071405	2.16602e+10	2.02013e+10	34.2337		31424960800	2342628124	22947325856	1.8905e+10	34.138		3.18503e+10	1.807e+10
RXN19145.1	A0A498MSN4	Dihydropyrimidinase-related 2 isoform X1	2206035778	7.99357e+08	7741992564	3.58246e+09	31.7383		7.44653e+10	1.71222e+10	73663380818	5.50836e+10	35.6809		896738496	1.17957e+09	3010410584	1.69557e+09	30.6591		2.65816e+07		28130177	2.73559e+07	24.7053		257145068	27.938		777284254	327769968	2.77402e+08	4.60819e+08	28.7796		3063359415		3099704375	3081531895	31.521		1329969526	490340450	4191065839	2.00379e+09	30.9001		35753664	4.35952e+09
RXN35227.1	A0A498NUS4	Transforming growth factor-beta-induced ig-h3	2785117410	3.94919e+09	1.30737e+10	6.60265e+09	32.6204		108781191		102425364	1.05603e+08	26.6541		3472275562	1.81244e+08	9051422287	4.23498e+09	31.9797								533500769	28.9909		149590223	150089119	153229382	1.5097e+08	27.1697		7913459174	460086057	16142692008	8.17208e+09	32.9281		12859238		6.54157e+07	3.91375e+07	25.222			8.85339e+08
RXN28822.1	A0A498NAG5	14-3-3 beta alpha-A	14508404705	1458126826	1.19013e+10	9.28927e+09	33.1129		1.7069e+10	609423952	30902398290	1.61936e+10	33.9147		1136316436	3.25385e+09	2232458304	2.20754e+09	31.0398		1165156267	3.45413e+08	686260287	7.32277e+08	29.4478		3785470034	31.8178		9191179843	4924180920	4.38773e+09	6.1677e+09	32.5221		7718608110	961755392	5323175891	4.66785e+09	32.1201		2465008754	11377763898	2557415029	5466729227	32.348		2805586697	2563359476
RXN11880.1	A0A498NVQ5	Annexin	5772888901	860020426	7093335407	4.57541e+09	32.0913		3.56796e+09	5.41122e+09	5766160854	4.91511e+09	32.1946		1097227818	937971751	322522238	785907269	29.5498		14411980		5.27301e+07	3.35711e+07	25.0007		1162847942	30.115		701516265	679599798	1819549908	1066888657	29.9908		4657928328	18321144	941119477	1.87246e+09	30.8023		488574696	1206874239	1.39965e+09	1.0317e+09	29.9424		319946974	736709205
RXN09117.1	A0A498LUN9	Malate dehydrogenase (EC 1.1.1.37)	5631997169	2595236214	6618055389	4.94843e+09	32.2043		22109620664	22195417031	55915910909	33406982868	34.9594		1077225934	2088212138	4484060320	2.54983e+09	31.2478		2.50536e+09	658975021	2.12578e+09	1.76337e+09	30.7157		5572951743	32.3758		3698300118	4867770471	3359366609	3.97515e+09	31.8884		6544551022	283477228	9.23134e+09	5.35312e+09	32.3177		7995458100	19218241326	15158458228	1.41241e+10	33.7174		7.24987e+09	1.98404e+09
RXN16149.1	A0A498M5I6	Fructose-bisphosphate aldolase (EC 4.1.2.13)	4.60319e+09	1238157389	7.96309e+09	4.60148e+09	32.0995		24823553912	10333540258	1.61455e+10	1.71009e+10	33.9934		23775844729	3673705618	34723128887	2.07242e+10	34.2706		2.49273e+09	3.16597e+09	3.92935e+09	3196014634	31.5736		10778015424	33.3274		2.25811e+10	1.48835e+10	9.12963e+09	1.55314e+10	33.8545		2.53185e+10	4.94694e+06	4.74432e+10	2.42556e+10	34.4976		28915706685	5.27572e+10	5.96805e+10	4.71178e+10	35.4556		1.17947e+10	3.56511e+09
RXN15553.1	A0A498M6L7	Troponin slow skeletal muscle-like protein	46247071680	509308720	60031337702	35595906034	35.051		517460562	22284190	768979801	4.36242e+08	28.7006		165811036		212939502	189375269	27.4967		159358276	206923307	1.23593e+08	1.63292e+08	27.2829		2.50889e+08	27.9025		109665437	68936322	132822317	1.03808e+08	26.6293		13042273772	1.96597e+09	24284786846	1.30977e+10	33.6086		3733391285	29212545708	4.82837e+09	1.25914e+10	33.5517			48816028
RXN32437.1	A0A498NLH3	Heat shock beta-1-like protein	2.01037e+10	1142514152	4.03166e+10	20520919053	34.2564		16255285		225662074	1.20959e+08	26.8499			78099824	193206544	135653184	27.0153		3.69315e+07	1.00555e+08	18384218	5.19569e+07	25.6308		51884764	25.6288		3.47773e+08	177047054	371273495	2.98698e+08	28.1541		1773521929		1420278462	1.5969e+09	30.5726		6.73956e+09	2.69992e+10	9526792121	1.44219e+10	33.7475		59475174	9.14487e+08
RXN31027.1	A0A498NH21	Histone H2B	232817955	162696304	1272317176	5.55944e+08	29.0504		2.25272e+10	38624556	8.18e+09	1.02486e+10	33.2547		439809209	579061401	50730256	356533622	28.4095		4.85475e+08	1.24487e+07	420663115	3.06196e+08	28.1899		858400587	29.6771		7.63805e+09	4.00898e+09	11839108102	7.82871e+09	32.8661				1489255371	1489255371	30.4719		11893268296	1940759477	63141603855	25658543876	34.5787		9.69762e+10	3.15253e+09
RXN07670.1	A0A498LHL4	Synaptosomal-associated protein	4684369819	2295159280	11454441906	6.14466e+09	32.5167		1.01285e+08		119330100	1.10307e+08	26.717			63114484		63114484	25.9115								1269210044	30.2413		1.2633e+09	2.18342e+09	1838826511	1.76185e+09	30.7144		3712324032		2446002035	3.07916e+09	31.5199		36794962	255394800	79111871	123767211	26.8831		106725436	700381780
RXN19580.1	A0A498MHH0	Myosin-9 isoform X1	3349254346	1912288578	8764423556	4675322160	32.1224		2.84595e+08		170231067	2.27413e+08	27.7607		377665008		407447398	392556203	28.5483		3.04115e+08	2.32811e+07	4.41535e+08	2.5631e+08	27.9333		9.58231e+08	29.8358		2.19186e+09	2378700270	2.12553e+09	2.23203e+09	31.0557		2457747754	192621213	3562887731	2071085566	30.9477		52222906	381020779	83688826	172310837	27.3604		1789555997	2.11484e+09
RXN33561.1	A0A498NP17	Myosin light chain smooth muscle-like protein	1433294941	3.40331e+07	3238356313	1.56856e+09	30.5468																				3472400090	31.6933		13288927			13288927	23.6637		42229357491	1.0711e+09	4.93414e+10	3.08806e+10	34.846									73326475
RXN35011.1	A0A498NT12	Complement C3-like protein	6.96631e+08	756242146	1.03405e+09	8.28975e+08	29.6268		6.1048e+08		2.7209e+09	1.66569e+09	30.6335		2922897843	853469612	9.59239e+09	4.45625e+09	32.0532								1.91986e+09	30.8384		8.46778e+08	2.17373e+09	1.95267e+08	1.07192e+09	29.9976		2.51949e+08		305173632	2.78561e+08	28.0534		5.42217e+10	4720713287	3.80373e+10	3.23266e+10	34.912		1403526754	8.82541e+09
RXN35233.1	A0A498NTE8	Neuroblast differentiation-associated AHNAK isoform X1	87902784	380689018		234295901	27.8038		3.78327e+07			3.78327e+07	25.1731		28712430	419532822	36796564	1.61681e+08	27.2686			6.34064e+06		6.34064e+06	22.5962		82255652	26.2936		17023612	190313563	32633546	7.99902e+07	26.2533				602401028	602401028	29.1661			194358417	6.39609e+07	1.2916e+08	26.9446			5.94579e+08
RXN17549.1	A0A498M948	Alpha-crystallin B chain-like protein	1.28411e+10	92740576	17606103386	1.018e+10	33.245		9.1455e+08		889673752	9.02112e+08	29.7487		81715025046	3181556208	106402782475	6.37665e+10	35.8921											50535992	68225295	53750943	5.75041e+07	25.7772		6106652390		781223748	3443938069	31.6814		659195404	1560096045	1113776020	1.11102e+09	30.0492
RXN31035.1	A0A498NGR6	Histone H2A	18425005672	13055178052	34273490385	2.19179e+10	34.3514		93477892		17122201874	8607839883	33.003		1502588660		14791384124	8146986392	32.9236								61454281762	35.8388			105204200	40324220	72764210	26.1167		35276988512		22606201120	28941594816	34.7524			232989220	40653783710	20443386465	34.2509		66670725901
RXN17400.1	A0A498MAX9	Plastin-2	4.28441e+08	366453124	1128466229	6.4112e+08	29.256		9.11262e+08	63481856	647293298	5.40679e+08	29.0102		8.55643e+08	92412248	3444889375	1.46431e+09	30.4476								2.2227e+09	31.0497		5964126015	9.14267e+09	2470989811	5.85926e+09	32.4481		4070092080	543409591	4.55104e+09	3.05485e+09	31.5085		2319370999	529816430	5.97466e+10	2.08653e+10	34.2804		7.22392e+09	7355058634
RXN21380.1	A0A498MM94	Annexin	6569958594	1350970024	6734920312	4.88528e+09	32.1858		240545543	393189280	5.18047e+08	3.83927e+08	28.5163		211016328	118365123	409618980	246333477	27.876		14523379		43510823	29017101	24.7904		4126108415	31.9421		800139614	982279979	2132005750	1.30481e+09	30.2812		2780069112	26723108	2540392665	1.78239e+09	30.7312		85351544	3.99882e+08	506314475	3.30516e+08	28.3001		2273314526	1048444753
RXN20843.1	A0A498MM11	Ras GTPase-activating IQGAP1	656419406	4.1136e+08	1.66236e+09	910047061	29.7614		111951248		51781350	81866299	26.2868		50339286		364615743	2.07478e+08	27.6284		1.04045e+08		7.29775e+07	8.8511e+07	26.3994		517051431	28.9457		1809891491	2.65754e+09	787947648	1.75179e+09	30.7062		1024882092	26587920	4.20002e+08	4.90491e+08	28.8697		67489388	2.07348e+08	1.70031e+08	1.48289e+08	27.1438		7.28292e+08	1490736891
RXN19698.1	A0A498MEQ4	Rab GDP dissociation inhibitor	1896933475	215546051	4211906570	2.10813e+09	30.9733		6985635551	2.53309e+09	13595079092	7.7046e+09	32.8431		2733038073	215995613	7098417800	3.34915e+09	31.6411		5.62955e+08	6.32923e+08	760204193	6.52027e+08	29.2804		2893554931	31.4302		2103016328	2065411623	1.20282e+09	1.79042e+09	30.7376		5884532578	1009689773	5199223392	4031148581	31.9085		3928080135	802249041	5.44586e+09	3.39206e+09	31.6595		4588110852	2.68798e+09
RXN21391.1	A0A498MJY7	Integrin alpha-1	1135117031	331421549	1858816540	1.10845e+09	30.0459		8197145			8197145	22.9667								3.95987e+06			3.95987e+06	21.917		828452462	29.6258		2.75317e+08	30453352	139931567	1.48567e+08	27.1465		1303616602	36511808	1599003568	9.79711e+08	29.8678								4.46619e+06	9149027
RXN26203.1	A0A498N232	Fermitin family-like protein	1361402612	1265086956	3794017536	2.14017e+09	30.9951		9564112		2.90956e+07	1.93298e+07	24.2043		80905590	14226736	270760592	121964306	26.8619		1.05889e+06		8.25547e+06	4.65718e+06	22.151		402460940	28.5843		1.66868e+08	1.86365e+08	4.45208e+08	2.66147e+08	27.9876		3219572716		1.5195e+09	2.36953e+09	31.142			3.01401e+08	1.0063e+08	2.01015e+08	27.5827		6.81355e+07	4.47421e+08
RXN22751.1	A0A498MPP4	Hemoglobin subunit alpha-like protein	57471414536	374452094637	144323687525	1.92082e+11	37.4829		120657814843	40880501669	204534394631	1.22024e+11	36.8284		90028163588	5.06687e+10	154720790744	9.84725e+10	36.519		2.84221e+07	3.46592e+07	1.01492e+08	5.48578e+07	25.7092		390236083427	38.5056		3.80047e+11	6.15894e+11	376732309769	4.57558e+11	38.7352		61415386010	3.4205e+10	44419988227	4.66801e+10	35.4421		1254462815180	1174456569407	1491458896164	1.30679e+12	40.2492		2.72705e+11	1.11338e+12
RXN35295.1	A0A498NTE0	40S ribosomal S3	5187052063	1.24199e+09	6106908116	4.17865e+09	31.9604		2233318834	2100224449	5728787743	3354110342	31.6433		283266738	727210045	443262402	4.8458e+08	28.8522		12088041406	4.34056e+09	2.0842e+10	1.24235e+10	33.5324		7229068456	32.7512		4.37959e+09	3800247847	5653928304	4.61125e+09	32.1025		5112868758	1.35884e+09	4.43578e+09	3.63583e+09	31.7596		2830060528	2003917745	4873924298	3.23597e+09	31.5915		5.62202e+09	1633458666
RXN07158.1	A0A498LFS7	Formin 2 isoform X1	7.24362e+08	3.7738e+08	725834620	6.09192e+08	29.1823		11909394			11909394	23.5056														10110033	23.2693		1.03274e+08	18651611	1.02196e+08	7.47072e+07	26.1547		18195464		156960242	87577853	26.3841			471674373		471674373	28.8132		99787821	424975293
RXN14898.1	A0A498M245	Leukocyte elastase inhibitor-like isoform X2	1540530846	297711358	3048170444	1628804216	30.6012		1.07259e+09	3.86343e+08	3253487846	1.57081e+09	30.5489		601779759		331585386	4.66683e+08	28.7979		221580849	2.88519e+08	567442579	3.59181e+08	28.4201		19875232084	34.2103		558793434	665455937	173654855	4.65968e+08	28.7957		9322526264	1.26832e+10	7.80919e+09	9.93829e+09	33.2104		1893204162	940065424	3393550818	2.07561e+09	30.9509		1.52414e+09	794875142
RXN07601.1	A0A498LHP7	14-3-3 epsilon	156064696	8957314		82511005	26.2981		3.83573e+09	3669356400	8.04926e+09	5.18478e+09	32.2716			27482644	538088882	282785763	28.0751		15913749		28409558	2.21617e+07	24.4016					76754312	58084694		67419503	26.0067		10619265817			10619265817	33.306			202691812		202691812	27.5947		1.15938e+08	65571712
RXN34293.1	A0A498NQV2	Myosin regulatory light polypeptide 9	1.28658e+10	7150824315	32124571237	1.73804e+10	34.0167				19377964	19377964	24.2079								8.25849e+06	18577395	12513763	1.31165e+07	23.6449		2913887132	31.4403		345022872	8.50109e+09	3.30577e+09	4050626528	31.9155		29154806746	99268902	5.48774e+09	1.15806e+10	33.431			371000272	4.17333e+06	1.87587e+08	27.483		7.38892e+08	2580390421
RXN23302.1	A0A498MUC6	F-actin-capping protein subunit beta	4142592141	6.13527e+08	1032730844	1.92962e+09	30.8457		1.4089e+09	2956479522	3175441130	2.51361e+09	31.2271		597751168	356348890	535906784	4.96669e+08	28.8877		5.01276e+08	9.54666e+07	8.47758e+08	481500012	28.843		2.0056e+09	30.9014		1575934643	2268964842	1.90965e+09	1.91818e+09	30.8371		2.44156e+09	219891162	1816679403	1.49271e+09	30.4753		1637173639	900089532	1354169559	1.29714e+09	30.2727		2.0743e+09	1199995985
RXN25415.1	A0A498N8X6	Collagen alpha-1(I) chain-like protein	6584766182	44629133846	4923952124	18712617384	34.1233		1.58374e+09		1.4291e+08	8.63326e+08	29.6853		6157406649	3.3867e+09	23580926408	1.10417e+10	33.3622		6.35775e+07	55960133		5.97688e+07	25.8329		881219710	29.7149		567915892	1.29344e+09	556347140	8.05901e+08	29.586		25049086	133308164	2507211126	888522792	29.7268			626736018		626736018	29.2233		664651493	2.58956e+10
RXN27591.1	A0A498L7R5	Malate dehydrogenase (EC 1.1.1.37)	4641679264	843730366	6448933168	3978114266	31.8894		25720931973	41439386253	6.83502e+10	4.51702e+10	35.3947		4485423048	8.06565e+09	7667482204	6.73952e+09	32.65		5.63702e+09	6.94467e+09	8.24846e+09	6.94338e+09	32.693		14388991116	33.7442		9.55674e+09	1.05554e+10	8547423115	9.55319e+09	33.1533		21394515773	7.15055e+08	1.52737e+10	1.24611e+10	33.5367		15340676622	59359507946	2.98587e+10	3.48529e+10	35.0206		1.58692e+10	3356167260
RXN09101.1	A0A498LM50	Peroxiredoxin-1-like protein	3543644914	5143606436	14590353809	7.7592e+09	32.8533		8.75716e+09	14455911008	3.05887e+10	17933914126	34.062		1839100682	1101983764	2685076499	1.87539e+09	30.8045		4.24633e+09	4098115057	2.98866e+09	3.7777e+09	31.8149		2038652465	30.925		15227929667	1.27902e+10	8.53113e+09	1.21831e+10	33.5042		8803437866	2269428485	18597696352	9.89019e+09	33.2034		2.09643e+11	16369747684	164299275939	1.30104e+11	36.9209		6.05327e+09	9.426e+09
RXN18958.1	A0A498MCT1	Cysteine and glycine-rich 1	61603540152	4103158007	85315519936	50340739365	35.551		33144712		144267498	88706105	26.4025				96566584	96566584	26.525		34173495	2.66279e+08	1851888250	7.17447e+08	29.4183		416076303	28.6323		416321144	391049429	624163756	4.77178e+08	28.83		508543264	20126506	969357526	499342432	28.8955		165648608	192825116	139617120	1.6603e+08	27.3069		5.3691e+06	871020881
RXN22404.1	A0A498MSP0	Prolargin-like protein	3685155960	604939734	5945741488	3.41195e+09	31.6679		5.82925e+07		30347256	4.43199e+07	25.4014		8608592494	1073534654	18122252075	9.26813e+09	33.1096			3.2706e+06		3.2706e+06	21.6411		6012563405	32.4853		792840783	1.2222e+09	1.15294e+09	1.05599e+09	29.976		533772934		2326415922	1430094428	30.4135		13728520	4.30487e+08	76549377	1.73588e+08	27.3711		76891341	1.03168e+10
RXN07826.1	A0A498LLC5	Gelsolin-like protein	918833526	1120943885	3899456724	1.97974e+09	30.8827		359968268		380758234	370363251	28.4644		189985226328	6.69904e+10	896869615137	3.84615e+11	38.4846		3.42456e+07		8.90453e+06	2.15751e+07	24.3629		2007653886	30.9029		5.29461e+09	9.41031e+09	2.51654e+09	5.74049e+09	32.4185		1875394998	14176884	2.69643e+09	1.52867e+09	30.5096		2677811292	2374342264	2.56923e+09	2.54046e+09	31.2424		7.98834e+09	4.21704e+09
RXN31707.1	A0A498NJ74	Lamin-A-like protein	1152536572	1623595918	4.14069e+09	2.30561e+09	31.1025		23094168	14967473	7.41489e+07	3.74035e+07	25.1567		1101067876	40616469	4839669528	1.99378e+09	30.8929		1.02672e+08	1.44661e+08	2.02475e+08	1.49936e+08	27.1598		5.19637e+09	32.2749		2.73938e+09	3769197766	5.46186e+09	3.99015e+09	31.8938		3412341388		3250960119	3.33165e+09	31.6336		584024894	2.35546e+09	894142159	1.27788e+09	30.2511		307568410	5441613008
RXN29225.1	A0A498NEU1	Glutathione S-transferase P	6309309018	3.82455e+09	15074473670	8.40278e+09	32.9682		3.73244e+09	17532683512	7385646547	9.55026e+09	33.1529		126241708	845717860	547002578	5.06321e+08	28.9155		100240836	1.8308e+08	7.89305e+07	1.2075e+08	26.8475		1609976242	30.5844		6599123502	14473275547	3712077062	8261492037	32.9438		27092373382	4.92525e+09	40311242602	2.41096e+10	34.4889		980888993	1545594514	1548166383	1358216630	30.3391		5065697520	7.45707e+08
RXN09288.1	A0A498LLJ4	Fructose-bisphosphate aldolase (EC 4.1.2.13)	2014838751	9265469386	1697898680	4326068939	32.0104		111855984	908311376	2050088251	1023418537	29.9307		38090740		51854808	44972774	25.4225			39642825	18748332	2.91956e+07	24.7992		6919373986	32.688		658975161	1.37064e+09	3.99506e+08	8.09706e+08	29.5928		12729511770	7304256582	23964763941	14666177431	33.7718		98662662	3.71636e+08	365506152	2.78602e+08	28.0536		2.90131e+10	2.07259e+09
RXN20813.1	A0A498MLY2	Lamin-B2	440806777	830368357	1191933496	821036210	29.6129		4140503814	1.5446e+08	5.43384e+09	3.24293e+09	31.5947		3155439987	371938566	7688226274	3.73853e+09	31.7998			8.11048e+07	3.23978e+08	2.02542e+08	27.5936		2303629091	31.1013		5.25243e+09	5.4e+09	8.10349e+09	6.25197e+09	32.5417		2.20232e+09		2.30628e+09	2.2543e+09	31.07		1.26605e+10	2578771867	1.63868e+10	10542019082	33.2954		2.43638e+09	2963369446
RXN12299.1	A0A498LV15	40S ribosomal protein S3a	2262604487	481533146	3163204385	1969114006	30.8749		1.35404e+09	746221918	5.29704e+09	2.46577e+09	31.1994		626637030	875671674	572674596	691661100	29.3655		1.08306e+10	4610170540	2.20228e+10	1.24879e+10	33.5398		2782198973	31.3736		3245014574	2.99623e+09	4.38681e+09	3.54268e+09	31.7222		7.57087e+08	472600820	1969433714	1.06637e+09	29.9901		2246195850	1470894656	3.58974e+09	2.43561e+09	31.1816		5.12229e+09	1.38915e+09
RXN38715.1	A0A498P3D0	Actin-related 3	1770981608	551101173	2648182816	1656755199	30.6257		2.8085e+09	947230642	3.37448e+09	2376739432	31.1463		1157538110	5.46013e+06	2959718568	1.37424e+09	30.356		2.19893e+08	90317268	460645042	2.56952e+08	27.9369		2739212480	31.3511		2.68179e+09	4355946596	1.79796e+09	2.94523e+09	31.4557		5695601459	202707949	5865932339	3.92141e+09	31.8687		773193010	360800090	998829637	7.10941e+08	29.4052		3025642475	1.6911e+09
RXN11748.1	A0A498LTG0	Myosin light polypeptide 6 isoform X1	19288024811	9269802910	65124535604	3.12275e+10	34.8621		86236969	1436275922		7.61256e+08	29.5038		138055827	36492496	155730708	1.10093e+08	26.7141		20921384	7.58322e+07	36552797	4.44355e+07	25.4052		1.44299e+10	33.7483		8302628078	8.47841e+09	22665137998	1.31487e+10	33.6142		30048342108	148849826	628214419	10275135451	33.2584			1765976589	91099412	9.28538e+08	29.7904		2.51607e+09	4843663047
RXN11919.1	A0A498LU01	ATP-dependent 6-phosphofructokinase (ATP-PFK) (Phosphofructokinase) (EC 2.7.1.11) (Phosphohexokinase)	1.2088e+09	6.58286e+08	3307877555	1.72499e+09	30.6839		5.36769e+09	329226868	5699294181	3.79874e+09	31.8229		30991498		312850716	171921107	27.3572								21763454	24.3754								154821656		2.04199e+08	1.79511e+08	27.4195		274670815	189187986	1314939965	592932922	29.1433		43818764	9451164
RXN27158.1	A0A498LF02	Superoxide dismutase [Cu-Zn] (EC 1.15.1.1)	3082169953	2358532546	7808124212	4.41628e+09	32.0402		745424592	611911210	1.17727e+09	8.44869e+08	29.6542		178953128	95409922	525710790	266691280	27.9906		6.97734e+07	1.51888e+08	1.38004e+07	7.84872e+07	26.226		4741734940	32.1428		522568395	1.47373e+09	1124081410	1.04013e+09	29.9541		2.15967e+09	7098104022	2.6583e+09	3972022244	31.8872		1.08413e+09	1468835336	420164559	9.91044e+08	29.8844		1.16436e+09	443291478
RXN34234.1	A0A498NRR8	78 kDa glucose-regulated	553450033	1298298731	2473195020	1441647928	30.4251		2.8587e+09	7.98517e+08	3.05865e+09	2.23862e+09	31.06		1286414443	3.05581e+08	4.00989e+09	1.86729e+09	30.7983		4750643035	4.67473e+09	3.96188e+09	4.46242e+09	32.0552		5863878380	32.4492		2.81153e+09	4440660364	1.45299e+09	2.90173e+09	31.4343		7589263246	1512695103	2544193134	3.88205e+09	31.8542		3209206513	1251828534	3.91375e+09	2.79159e+09	31.3784		3417177112	2.792e+09
RXN20181.1	A0A498MGG0	Vinexin-like isoform X1	9.5128e+08	4.53553e+08	1668658502	1.0245e+09	29.9323																							20772598		18641588	19707093	24.2322		20079564		209132894	114606229	26.7721									157365673
RXN08837.1	A0A498LTT6	Nidogen-2 isoform X1	596362732	65026636	1227891721	629760363	29.2302		161143987		5.71329e+06	8.34286e+07	26.314		26503544		141215174	83859359	26.3215		227753562	6.97251e+07	249399741	1.82293e+08	27.4417		2.25754e+08	27.7502		122531850	18853598	7708815	4.96981e+07	25.5667		25416594	38938076	119344600	61233090	25.8678		42067060	1.81433e+08	1.1165e+08	111716534	26.7353		144031260	165295284
RXN19705.1	A0A498MRR5	NADH-cytochrome b5 reductase (EC 1.6.2.2)	3.43193e+09	5.62452e+08	4022411715	2.67227e+09	31.3154		1.45795e+09	241531890	3.7782e+09	1.82589e+09	30.766		201020442	109280812		155150627	27.2091		602505114	4.59046e+07	9.86064e+08	5.44824e+08	29.0212		1.5547e+09	30.534		7.52264e+08	1137644852	1657037383	1.18232e+09	30.139		1904805400	161962050	1784332624	1.2837e+09	30.2577		3.31379e+09	1904942092	10045758600	5.08816e+09	32.2445		1166094537	6.2596e+08
RXN19136.1	A0A498MJX4	Gag-pol fusion poly	2.39625e+09	4.8556e+08	3435415524	2.10574e+09	30.9717		95376003		25264217	60320110	25.8461		15997948		141413324	78705636	26.23		4.64197e+07	9.44852e+07	90993789	7.72996e+07	26.204		271936851	28.0187		5.59736e+07	12044434	5.04035e+07	3.94738e+07	25.2344		74362498		442255125	2.58309e+08	27.9445		63605713	1.71528e+08	58387955	9.78406e+07	26.5439		18175735	299413431
RXN05298.1	A0A498LAU6	L-lactate dehydrogenase (EC 1.1.1.27)	2297503883	621992700	2.05466e+09	1.65805e+09	30.6268		9.66006e+09	1845358748	1.48348e+10	8.78008e+09	33.0316		1622593692	906218480	3013597176	1.84747e+09	30.7829		3.38322e+08	9.18277e+07	517068195	3.15739e+08	28.2342		1259215680	30.2299		1.20995e+09	6.36065e+08	1182318132	1009443588	29.9109		3.64758e+09	401400333	6197185129	3.41539e+09	31.6694		7763095068	2038795046	9.81798e+09	6.53996e+09	32.6066		742915612	1.00045e+09
RXN09106.1	A0A498LPS4	Actin-related protein 2	6.86289e+08	1.70203e+08	1071025855	6.42506e+08	29.2591		1399664332	481648954	2847376976	1.57623e+09	30.5538		111279696		344007854	227643775	27.7622		1.51382e+08	2.51208e+07	156445120	1.10983e+08	26.7258					234578853	1813341824	3.79028e+08	8.08983e+08	29.5915		3.37776e+09	1234996027	1.02003e+10	4.9377e+09	32.2012		351857823	133837216	1805538266	763744435	29.5085		1.38016e+09	689351812
RXN29152.1	A0A498NB81	Guanine nucleotide-binding subunit beta-2-like 1	2939177676	36848540	2049925202	1.67532e+09	30.6418		2.30648e+09	2.32618e+09	4307665078	2980110056	31.4727			154787484		154787484	27.2057		3219181266	5257878090	1.27078e+10	7.06162e+09	32.7174		8161243195	32.9261		2596099046	3400161070	456529800	2150929972	31.0023		2900126652	1319948960	2893186474	2371087362	31.1429		1570269528	31820608	3.0165e+09	1.53953e+09	30.5198		1000485252	1.24916e+09
RXN12216.1	A0A498LYB8	Deglycase DJ-1	1.97567e+09	753705552	4276586504	2.33532e+09	31.121		236579378	838199760	6.76991e+08	5.83923e+08	29.1212		194802036	40707516	5525058984	1920189512	30.8386		56034280	90593937	1.73453e+07	5.46578e+07	25.7039		3.37891e+08	28.332		289542958	645262419	2.20704e+07	3.18959e+08	28.2488		373853528	50862940	1714387139	7.13035e+08	29.4094		79158162	1522756050	186881831	5.96265e+08	29.1514		5.48686e+08	218212088
RXN27388.1	A0A498MZM9	Calpain-2 catalytic subunit-like protein	1063065396	1262175044	2234251878	1.51983e+09	30.5013		186218923		1.00469e+08	1.43344e+08	27.0949		1230984629	116123200	5184011417	2.17704e+09	31.0197				29775681	29775681	24.8276		1039515400	29.9533		967938569	1.22176e+09	548617111	9.12773e+08	29.7657		1370727550	109772934	1492301293	9.90934e+08	29.8842		229263264	229448058	417426809	2.92046e+08	28.1216		4.12165e+08	1358734238
RXN39545.1	A0A498LRW2	Apolipo A-I	12964983620	96752462907	1.6909e+10	4.22088e+10	35.2968		3864067682	438869882	2.36067e+10	9.30323e+09	33.1151		5665549979	2.21754e+10	20191762670	1.60109e+10	33.8983		4.99099e+08	6.16344e+08	2.62174e+08	4.59206e+08	28.7746		4.20601e+10	35.2917		9.27518e+09	7.3736e+10	4953562621	2.93216e+10	34.7712		4011470651	3690621512	12876206922	6.85943e+09	32.6754		370068174462	1.9135e+11	2.91588e+11	2.84335e+11	38.0488		42505697206	2.45533e+11
RXN03759.1	A0A498LIL1	Myosin light polypeptide 6-like isoform X2	1170687728	625726518	4077663506	1.95803e+09	30.8668			362459168	272443661	3.17451e+08	28.242				5.43078e+06	5.43078e+06	22.3727								3202874591	31.5767		494852328	8.70452e+08	866090272	7.43798e+08	29.4703		1.74726e+10		1.10918e+10	1.42822e+10	33.7335			192035336		192035336	27.5168		279252950	410259716
RXN30569.1	A0A498N817	Polymerase I and transcript release factor-like protein	4254534291	1553102912	5914230510	3.90729e+09	31.8635		3.80726e+08		2.11485e+07	2.00937e+08	27.5822		82283672			82283672	26.2941		2.89609e+08	435256767	4.30451e+08	3.85106e+08	28.5207		1233498093	30.2001		622349830	661865922	1.11176e+09	7.98659e+08	29.573		1043979597		2269128386	1.65655e+09	30.6255		18013986	2.66355e+09	1.95858e+08	9.5914e+08	29.8372		32949698	1.99291e+09
RXN28686.1	A0A498NCF3	60S acidic ribosomal protein P0	4.12656e+09	789631176	5030732455	3.31564e+09	31.6266		340167893	1773718740	1543063728	1.21898e+09	30.183		674320968	497511630	564670873	5.78834e+08	29.1086		5.57137e+09	9.6207e+08	7.2704e+09	4.60128e+09	32.0994		7360329354	32.7771		3671894951	2974132647	2.95198e+09	3.19934e+09	31.5751		5206601226	63485504	2705333569	2658473433	31.308		609840955	1810383307	1145108199	1.18844e+09	30.1464		2.91239e+09	1610027385
RXN27942.1	A0A498N8B5	Vimentin	476555599	210214092	2364980732	1017250141	29.922		1.3041e+10	2.15735e+09	7.41827e+09	7.53886e+09	32.8117		32360367432	3548157968	68252718396	3.47204e+10	35.0151		33326288			33326288	24.9902		732725216	29.4487		276329687	2609326827	213662240	1.03311e+09	29.9443		32923080846	1.02833e+09	159417409	1.13703e+10	33.4045		90130786	8482743197	184031015	2.91897e+09	31.4428			3.10708e+10
RXN25902.1	A0A498N260	Complement C3-like protein	9.53993e+08	1.07831e+09	1.5078e+09	1.18004e+09	30.1362		1.6011e+09		4.43449e+09	3.01779e+09	31.4908		3350405204	1072692048	9638019955	4687039069	32.126		82264738	1.2865e+08	109938049	1.06951e+08	26.6724		4905937107	32.1919		8.23688e+08	1.77757e+09	8.8515e+08	1.16214e+09	30.1141		634461812	104951011	551458214	4.3029e+08	28.6807		1.82932e+11	8820365330	1.52116e+11	1.14623e+11	36.7381		8.11935e+09	35115962667
RXN25954.1	A0A498N2K6	Collagen alpha-1(I) chain-like protein	4.11584e+09	6.33686e+09	3168253071	4.54032e+09	32.0801		4.26282e+09		6.73088e+08	2.46796e+09	31.2007		3.75109e+10	4.55621e+09	99859594162	4.73089e+10	35.4614		8.45524e+08	1.39846e+08	258430323	4.146e+08	28.6271		515312421	28.9409		1.06391e+09	2491365524	763873000	1.43972e+09	30.4231		1096012612	441583085	1.14271e+10	4.32158e+09	32.0089		198313754	1979619837	254917234	810950275	29.595		1289453974	71751731542
RXN22754.1	A0A498NFT9	Nitrogen permease regulator 3 isoform X2	22378460399	48553513177	56009755911	42313909829	35.3004		3.46804e+10	20086405582	6.07473e+10	3.85047e+10	35.1643		9147538627	8.15124e+09	19148339316	1.2149e+10	33.5001				2.97167e+06	2.97167e+06	21.5028		68881319664	36.0034		111714722926	1.48783e+11	9.23511e+10	1.17616e+11	36.7753		25679075732	11717616840	20762367962	1.93864e+10	34.1743		4.37474e+11	214857696236	4.98597e+11	3.83643e+11	38.481		9.21367e+10	2.75247e+11
RXN30600.1	A0A498NBN5	Smoothelin isoform X1	631442914	243707171	1012981215	629377100	29.2293																													1.35799e+09		1.02582e+09	1191904874	30.1506			90259618		90259618	26.4276			7.17088e+06
RXN38025.1	A0A498ML14	Olfactomedin 3	1173900011	1.22926e+08	3059738759	1.45219e+09	30.4356								336116228		572941384	454528806	28.7598								49134795	25.5502		4532136	5561303		5.04672e+06	22.2669				20557346	20557346	24.2932									53292445
RXN27422.1	A0A498LLW9	Tubulin beta chain	122945884	52685147	794504610	323378547	28.2686		6.48436e+08		2.59097e+09	1.6197e+09	30.5931		283900808		822519084	553209946	29.0433								25572847	24.6081		2.34793e+08	1.33501e+09	584518345	7.18107e+08	29.4196								58731506081	4183623959	97695413249	53536847763	35.6398		1.10927e+09	3036655029
RXN30879.1	A0A498NGB7	Coronin	943207202	138500884	2517714125	1.19981e+09	30.1602		213100502		1.50949e+08	1.82025e+08	27.4396		71599536		214298552	142949044	27.0909		52781183	3.97579e+07	1.04265e+08	6.56013e+07	25.9672		518628860	28.9501		1.07465e+09	5.39309e+08	8.08151e+08	807370270	29.5887		1016043538	19259546	1391161728	808821604	29.5912		62169268	4.64227e+07	76477368	6.16898e+07	25.8785		126365768	666240227
RXN34863.1	A0A498NSE9	Fibulin-1-like isoform X2	1137688395	363268123	542017114	6.80991e+08	29.3431								23149952		291249256	157199604	27.228		5.66258e+07	9937070	3.89511e+07	3.51713e+07	25.0679		20983330	24.3227		26703948		13154088	19929018	24.2484		47809904		107422888	77616396	26.2099		105842980		162351133	1.34097e+08	26.9987			247274827
RXN27145.1	A0A498NCG3	Integrin-linked kinase	1625186149	5.25759e+08	3862435380	2.00446e+09	30.9006		66946244		27982410	47464327	25.5003				85515971	85515971	26.3497								354440898	28.401		106500831	331208569	300663666	2.46124e+08	27.8748		991740023	58326300	1716346195	922137506	29.7804		52531052	228177913	8.66615e+07	1.22457e+08	26.8677		27331398	401877676
RXN28733.1	A0A498N919	Creatine kinase M-type	1810967788	701049260	3278293236	1930103428	30.846		1.90041e+10	1.52741e+10	7.8039e+08	1.16862e+10	33.4441		16368398940	3.47557e+09	22547226680	1.41304e+10	33.7181								4974865093	32.212		22704339754	2.881e+10	1.31788e+10	2.15644e+10	34.3279		33894752958		5795091612	19844922285	34.2081		5509088536	65276032138	18004360804	29596493826	34.7847		3132078556	3.69887e+08
RXN25357.1	A0A498N9I9	Zinc finger MIZ domain-containing 2 isoform X1	36078586159	9038684228	24882162518	2.33331e+10	34.4417		2383696274	11930179256	8574155662	7.62934e+09	32.8289		316848288	759385572	2032159424	1.03613e+09	29.9486		8.09043e+08	1047171742	86396005	6.47537e+08	29.2704		31812532696	34.8889		21436993500	13043011822	12697860066	1.5726e+10	33.8724		5082373140	5465998496	12189688946	7.57935e+09	32.8194		4137444480	1747575725	2743623967	2876214724	31.4215		8750501034	1735741813
RXN38981.1	A0A498P452	Calponin	2.6025e+09	469679153	2404032274	1.8254e+09	30.7656			22101290	10468914	16285102	23.957		40516414	171207948	41501548	8.44086e+07	26.3309				1.20842e+06	1.20842e+06	20.2047		92043848	26.4558		385339366	595475167	7.66948e+08	5.82587e+08	29.1179				2.30969e+08	2.30969e+08	27.7831			86095162		86095162	26.3594		2.42381e+08	1.28668e+09
RXN07239.1	A0A498LG29	Pigment epithelium-derived factor	1570204394	2211761086	3851388012	2544451164	31.2447								35228708		450461606	242845157	27.8555											28135206		4.10556e+06	1.61204e+07	23.9424								28887342	26072179	1.72442e+07	2.40679e+07	24.5206		13283175	232542848
RXN14808.1	A0A498M1X6	Coiled-coil domain-containing 18-like isoform X1	496631187	417520288	2240876857	1.05168e+09	29.97		3.21445e+09	4.33802e+08	1733013788	1.79376e+09	30.7403		4.47451e+09	691120957	1.51156e+10	6.76042e+09	32.6545								862380976	29.6838		4.98311e+09	6575612268	2541626112	4.70012e+09	32.13		3919055946	1.01329e+08	4.15867e+09	2.72635e+09	31.3443		527430056	36685453	1456038396	673384635	29.3269		6.68992e+09	5.05119e+09
RXN27853.1	A0A498N6L4	Sorbin and SH3 domain-containing 1-like isoform X1	1133269708	242380571	1623689389	9.9978e+08	29.897		2.63064e+07		53363904	3.98352e+07	25.2475																									53351066	53351066	25.669		35667018	262593927	10454783	1.02905e+08	26.6167			20818188
RXN11060.1	A0A498LXQ7	Adenylate kinase isoenzyme 1 (AK 1) (EC 2.7.4.3) (EC 2.7.4.6) (ATP-AMP transphosphorylase 1) (ATP:AMP phosphotransferase) (Adenylate monophosphate kinase) (Myokinase)	3.02861e+09	2417667064	12600786324	6.01569e+09	32.4861		1.14331e+09	7565292832	2.50349e+09	3.73737e+09	31.7994		780100802	735705832	2454021094	1.32328e+09	30.3015			3.97651e+07		3.97651e+07	25.245		2395017211	31.1574		8769142761	4068044516	4759645023	5.86561e+09	32.4496		332061894	69449710	3875771780	1425761128	30.4091		1610023445	17324822702	1877212318	6.93735e+09	32.6917		8.00651e+08	625589959
RXN37128.1	A0A498NZA9	PDZ and LIM domain 1	1858133529	61389840	616304192	8.45276e+08	29.6548		36007397		11704735	23856066	24.5079								102758098	1.47105e+08	569352793	2.73072e+08	28.0247		414611333	28.6272		602396705	851513843	6.7482e+08	7.09577e+08	29.4024		12774699	327860538	32388712	1.24341e+08	26.8897		35855316	611481931	116334348	2.54557e+08	27.9234		57898450	942610461
RXN28728.1	A0A498N3H6	Calpain small subunit 1-like protein	302705854	590183424	1565837876	819575718	29.6103								132101472		254713520	193407496	27.5271		9.44495e+06	4.77431e+06	3539967	5.91974e+06	22.4971		591422528	29.1396		3580861588	1166955224	2.5206e+09	2.4228e+09	31.174		834323864	157023968	809825826	6.00391e+08	29.1613			942702062		942702062	29.8122		1.26271e+08	268619376
RXN16388.1	A0A498M656	EGF-containing fibulin-like extracellular matrix 1	2314267806	1146524084	5877947404	3112913098	31.5356								76364712		235078112	155721412	27.2144		4.31704e+06	1.03241e+07	7.45016e+06	7.36378e+06	22.812					39171254	59738148	203300117	1.00737e+08	26.586									305618116		305618116	28.1872		18762924	418994885
RXN27941.1	A0A498N579	Ras suppressor 1 isoform X2	5.6043e+09	602493346	12136327022	6.11437e+09	32.5096			43574884		43574884	25.377														650706548	29.2774		6.5881e+07	246347150	5.70861e+08	2.94363e+08	28.133		453487438		106812984	280150211	28.0616			3.73896e+08		3.73896e+08	28.4781		4.49508e+07	4.34629e+08
RXN06742.1	A0A498M0B1	Peroxiredoxin-1	516942235	545781768	15392126013	5.48495e+09	32.3528		7.472e+09	3355060909	4.38825e+09	5.07177e+09	32.2398		57741004	55229831	77340392	6.34371e+07	25.9188		388130377	3.31834e+09	2.1599e+08	1.30749e+09	30.2841		30437745555	34.8251		1423286362	7.34013e+08	5372969688	2.51009e+09	31.2251		7183366244	893029967	4470387457	4.18226e+09	31.9616		1927484989	924898716	1644624671	1499002792	30.4814		6.91266e+09	2.54637e+09
RXN12800.1	A0A498LX76	Major vault	420719706	355515141	1.68045e+09	8.18895e+08	29.6091		2.45402e+09	57937804	3628439776	2.0468e+09	30.9307		5.19137e+08	72740457	2606309597	1.06606e+09	29.9896		2.54405e+07		8.21296e+06	1.68267e+07	24.0043		7306514234	32.7665		1.30818e+09	2.37649e+09	1.02206e+09	1.56891e+09	30.5471		1176818359		978171186	1.07749e+09	30.005		460630175	419242398	4.85617e+08	4.55163e+08	28.7618		530772087	9.09779e+08
RXN20681.1	A0A498MHT5	GC-rich sequence DNA-binding factor 2-like protein	1.9843e+09	272929636	3535995933	1.93108e+09	30.8468		2.30192e+09	839417836	4171295384	2.43754e+09	31.1828		229066498	343503984		286285241	28.0929		17468977	5224903	6178682	9.62419e+06	23.1982		2.20343e+09	31.0371		6.2515e+08	901366512	1119368068	8.81962e+08	29.7161		4130687893	10283411	7.09578e+08	1.61685e+09	30.5905		342319669	5.28245e+08	6.98093e+08	5.22886e+08	28.9619		4.42153e+08	479129682
RXN26239.1	A0A498MW04	Tubulointerstitial nephritis antigen-like protein	2394384879	110883274	1838875811	1448047988	30.4315		94951841		68695027	81823434	26.286		31081074		98761960	64921517	25.9522		56195528	89338535	2.98765e+08	1.481e+08	27.142		20722858	24.3047			8976201	82252076	4.56141e+07	25.443		75558564		294294806	184926685	27.4624			12614630	31318783	2.19667e+07	24.3888			2.69134e+08
RXN32421.1	A0A498NKN9	Erythrocyte band 7 integral membrane-like isoform X2	769562501	1.94845e+08	3.13945e+08	4.26118e+08	28.6667		2.67448e+09	860933847	5.08166e+09	2.87236e+09	31.4196		172377382	75896060	17722138	8.86652e+07	26.4019		6.47411e+07		8.49173e+08	4.56957e+08	28.7675		532915641	28.9893		1059145726	307543405	2086814404	1151167845	30.1005		219186924		330449932	274818428	28.0339		1231753534	226345386	2010201604	1.1561e+09	30.1066		986332223	285862881
RXN22753.1	A0A498NG19	Hemoglobin subunit alpha-like protein	6356828992	26101465511	19361678290	1.72733e+10	34.0078		14502651664	1010679260	2.32836e+10	1.29323e+10	33.5903		4191326830	2743873480	4892162482	3942454264	31.8764								29743634546	34.7919		4.6705e+10	90690356274	31082352015	5.61592e+10	35.7088		10683199967	1373376086	6204139103	6086905052	32.5031		1.15026e+11	77011324298	1.36566e+11	109534289463	36.6726		1.05056e+10	135101724248
RXN32483.1	A0A498NKR5	Myosin regulatory light polypeptide 9	1098887712	523620928	2019535380	1.21401e+09	30.1771									20464964		20464964	24.2867								5206222452	32.2776		101468616	566632766	532033058	4.00045e+08	28.5756		2265729072		93136528	1179432800	30.1354			43842024		43842024	25.3858		4.83722e+08	1006995654
RXN17270.1	A0A498MAB6	Septin-2B isoform X1	1252655104	150889418	2279506428	1227683650	30.1933		6.03384e+08	559301902	6.8321e+08	615298668	29.1967		102917675		1046797066	5.74857e+08	29.0986		6.94816e+06	10178786	37306615	1.81445e+07	24.113		5.36538e+08	28.9991		685203720	7.26705e+08	9.54392e+08	7.88767e+08	29.555		1657964350		1.21724e+09	1.4376e+09	30.421		530435800	113993708	756325693	4.66918e+08	28.7986		326065455	1336277505
RXN17710.1	A0A498MBT3	Aldose reductase-like protein	7.39391e+09	546687447	468824022	2.80314e+09	31.3844		377721001	1607261753	1222747604	1.06924e+09	29.9939		401202320	347999828		374601074	28.4808		125282768	3.80317e+08	8.21902e+08	4.42501e+08	28.7211		127381012	26.9246		396356572	2068273127		1.23231e+09	30.1987		423506080		1035602756	729554418	29.4424		17744449815	1.78838e+09	21007576290	1.35135e+10	33.6537		759667828	1236891382
RXN34765.1	A0A498NS28	Integrin beta	1513095414	535701102	2227824316	1.42554e+09	30.4089									103487434		103487434	26.6249		5064775	5990162	7514523	6189820	22.5615		752053490	29.4863		292078174	538638099	217478867	349398380	28.3803		6.61015e+08	900905041	1939025707	1.16698e+09	30.1201		359233554	88693369	740119036	3.96015e+08	28.561		210637874
RXN17591.1	A0A498M9X2	Laminin subunit alpha-4	270878997	9539688	292070899	1.9083e+08	27.5077				28020536	28020536	24.74		13987464		17734022	15860743	23.919				1.55452e+07	1.55452e+07	23.89		347903127	28.3741		122649842	28606718	61924167	7.10602e+07	26.0825		148166322			148166322	27.1426		22269872	53470326	4.95446e+07	4.17616e+07	25.3157		2.16165e+07	1.36037e+08
RXN34192.1	A0A498M5K9	Guanine nucleotide-binding subunit beta-2-like 1	223459820	680328461		4.51894e+08	28.7514				169535197	169535197	27.337			634717635		634717635	29.2415		6749431814	203098390	955363330	2.63596e+09	31.2957		33307446	24.9893		138386334	177443128	3.68987e+09	1.33523e+09	30.3144		98495344			98495344	26.5536		54174888	761709030		407941959	28.6038		4.39936e+09	11229512
RXN02479.1	A0A498L2N3	Hyaluronan and proteoglycan link 1-like protein	2372721176	111222996	3153539198	1.87916e+09	30.8074		18102752		9.36341e+07	5.58684e+07	25.7355		95205947		696766866	3.95986e+08	28.5609											158998090	306761609	388899486	284886395	28.0858		663594676		1014790421	8.39193e+08	29.6444		37413984	1466064184	32345174	511941114	28.9314			8.09765e+08
RXN20828.1	A0A498MHQ4	Peptidyl-prolyl cis-trans isomerase (PPIase) (EC 5.2.1.8)	15405802076	2050701040	18340065160	1.19322e+10	33.4741		1.28705e+09	3247524400	5193117984	3.24256e+09	31.5945		829007768	388023712	1305034064	8.40689e+08	29.647		1.88434e+08	1.30242e+09	294854480	5.95237e+08	29.1489		6278430456	32.5478		4344508890	3945108400	2598839638	3.62949e+09	31.7571		3894463080	349725272	4985261297	3.07648e+09	31.5186		482658864	470970302	1465948193	8.06526e+08	29.5871		1.73187e+09	746957539
RXN05358.1	A0A498LB05	Isocitrate dehydrogenase [NADP] mitochondrial	5.15859e+08	2.67246e+08	1457951238	7.47019e+08	29.4766		3.49441e+10	20620599734	59669755776	3.84115e+10	35.1608		5981196489	2.19634e+09	31782494398	1.332e+10	33.6329		3.46609e+09	1552229823	5.96684e+09	3.66172e+09	31.7699		4296805867	32.0006		2.47535e+09	4.32309e+09	1.36942e+09	2.72262e+09	31.3423		1.03122e+10	243977865	7.07944e+09	5.87852e+09	32.4528		10171197059	6.69496e+10	2.39351e+10	3.36853e+10	34.9714		28924787203	1.35927e+09
RXN28119.1	A0A498N1F4	Fibronectin-like protein	1.85436e+08	16201628	616373796	2.72671e+08	28.0226																							2.73076e+08	1.39701e+08	115403724	1.7606e+08	27.3915									12532196		12532196	23.5791			1.63338e+08
RXN25729.1	A0A498MUT6	Non-muscle caldesmon-like isoform X1	559740512	365627281	1293292619	7.39553e+08	29.4621		1.31362e+08	22629186	1.54446e+08	1.02812e+08	26.6154		280979827	49448441	1522060997	6.17496e+08	29.2019		199352794	7.78666e+07	128626917	1.35282e+08	27.0114		518333621	28.9493		1.09067e+08	1049250967	4.57306e+08	5.38541e+08	29.0045		858112381	8971983	901703233	5.89596e+08	29.1352		39578008	593692536	358647476	330639340	28.3007		8.9149e+07	4169032857
RXN33665.1	A0A498NP10	Myosin regulatory light chain skeletal muscle isoform	2.34035e+09	244248312	5877447356	2.82068e+09	31.3934		422874030	1.19935e+09		8.11112e+08	29.5953		1174557222	3.30345e+09	862994180	1.78033e+09	30.7295								673641300	29.3274		25629281465	2.01822e+10	110413363709	5.2075e+10	35.5999		306844412	581505542	5999976344	2296108766	31.0965			78734958		78734958	26.2305		2.16903e+09
RXN07412.1	A0A498LHT6	ADP ATP translocase 2	2227738626	1248777434	2840652800	2.10572e+09	30.9717		4.26743e+10		2018355574	2.23463e+10	34.3793		3012919745	5.6205e+09	3.15628e+09	3.9299e+09	31.8718		1.67485e+10	6.54681e+09	2.27665e+10	1.53539e+10	33.8379		1.891e+10	34.1384		8872392304	1.26473e+10	17890235143	1.31366e+10	33.6129		23611683990	1.25478e+10	21301085932	1.91535e+10	34.1569		14105545317	6.38311e+10	26654967954	3.48639e+10	35.021		3.8665e+10	3721987459
RXN17042.1	A0A498MC86	Glutathione S-transferase A-like protein	16158517340	10829950148	3815715224	10268060904	33.2574		8027826472	20860411550	8400251364	12429496462	33.533		990100421	873981274	1394215804	1.0861e+09	30.0165		628246672	117092144	323132920	3.56157e+08	28.4079		15976250038	33.8952		552493438	3.17898e+09	142817358	1.29143e+09	30.2663		8.17832e+08	7967052676	2864351161	3.88308e+09	31.8546		942281889	3057534908	2303046421	2100954406	30.9684		2962852596	3265689297
RXN07852.1	A0A498LJ34	SH3 domain-binding glutamic acid-rich-like protein	8921151906	2127009631	20530029459	1.05261e+10	33.2932		1.78911e+07	19661472	132608328	5.67203e+07	25.7574														403122765	28.5866		1144435719	1133764950	966727268	1.08164e+09	30.0106		2839929878		2413261118	2626595498	31.2905		46501612	37490284	69763319	5.12517e+07	25.6111		126845862	4.51762e+08
RXN23560.1	A0A498MSQ5	Mimecan-like protein	2611506310	3935202490	6788378036	4.44503e+09	32.0495		340369489		8123926	1.74247e+08	27.3766		6181458655	949960271	14606637907	7.24602e+09	32.7545			18880489	7.75401e+06	1.33173e+07	23.6668		257620580	27.9407		801638904	280964620	715070297	599224607	29.1585		1484789108		1973423361	1.72911e+09	30.6874		18065942	4.82151e+08	105617678	2.01945e+08	27.5894		232302970	6.82923e+09
RXN22231.1	A0A498MMT5	WD repeat-containing 1	1649747440	421098634	5192055260	2.42097e+09	31.1729		4083868724	1008215116	4424669055	3172250965	31.5629		749656734	409508963	3.69796e+09	1.61904e+09	30.5925		4.11139e+08	1.51917e+08	7.50238e+08	4.37765e+08	28.7056		4.0033e+09	31.8985		3466327955	3.29324e+09	1.76216e+09	2.84057e+09	31.4035		2334994026	11688461	5555742847	2634141778	31.2947		1319117234	530141189	1236038964	1.02843e+09	29.9378		1.94731e+09	1.64471e+09
RXN33676.1	A0A498NPH6	Ras-related R-Ras-like protein	1256196302	666721926	3030324232	1651080820	30.6208		118009950		350101057	2.34056e+08	27.8023		18724976			18724976	24.1585				5515188	5515188	22.395		193956280	27.5312		192498414	1.19477e+08	388364522	2.33447e+08	27.7985		758688656		152128642	455408649	28.7626			302763132		302763132	28.1736		57795501	2.74424e+08
RXN06676.1	A0A498LI33	Rho GDP-dissociation inhibitor 1	1958865499	262800840	5999554752	2.74041e+09	31.3517		3160742342	1335907088	5018538295	3.17173e+09	31.5626			122906320	250012376	186459348	27.4743		3.25586e+08	6.83883e+08	173158197	3.94209e+08	28.5544		1823127299	30.7638		4271913382	2295127138	2345158904	2.97073e+09	31.4682		1719485062		1580636616	1650060839	30.6199		2533654974	2346274740	2765252896	2.54839e+09	31.2469		1915799421	1194495305
RXN15484.1	A0A498M8E6	Endoplasmin	582360452	474222042	1.17886e+09	7.45147e+08	29.4729		3473043168	602133711	5.43846e+09	3.17121e+09	31.5624		951186884	261478262	3824132024	1678932390	30.6449		6586916989	2.08835e+09	4.1977e+09	4.29099e+09	31.9987		3787641559	31.8187		2.19136e+09	3.23126e+09	9.04498e+08	2.10904e+09	30.9739		6.29678e+09	264528351	2.26364e+09	2.94165e+09	31.454		2342150796	520346747	3221041003	2027846182	30.9173		5302732329	4777095891
RXN22282.1	A0A498MRU3	Fatty acid-binding heart-like protein	2467089750	812664692	7319003628	3.53292e+09	31.7182		248536774		529814161	3.89175e+08	28.5358		4007736436	4964808000	6766162808	5246235748	32.2886		65729089	3.01408e+08		1.83569e+08	27.4517		2328818240	31.117		3390245850	2.32725e+09	1755415394	2.49097e+09	31.2141		9820020494	28913516	1262322766	3.70375e+09	31.7863		633493096	430883390	485273446	5.1655e+08	28.9443		619770614	4418680666
RXN08802.1	A0A498LLW6	Transaldolase (EC 2.2.1.2)	635176098	431658771	1210231144	7.59022e+08	29.4996		1.66305e+09	442754258	2.61064e+09	1.57215e+09	30.5501		201330748	173295560	299617875	224748061	27.7437		274963195	2.30374e+08	553355244	3.52897e+08	28.3947		3373236744	31.6515		3.38061e+08	918570188	55970620	4.37534e+08	28.7048		1.46709e+09	378606182	783868336	8.76523e+08	29.7072		354380473	227335264	698631196	426782311	28.6689		2745723838	348691678
RXN17024.1	A0A498MCJ8	Chloride intracellular channel protein	989774391	65788460	632610035	5.62724e+08	29.0679		24885440		62930616	43908028	25.388				98948010	98948010	26.5602								141585264	27.0771		729555494	7.82112e+08	8.51087e+08	787584851	29.5529		460983315		565426182	5.13205e+08	28.935		91166720	156460196	1.68339e+08	1.38655e+08	27.0469		519060912	352861315
RXN12912.1	A0A498LZX5	Glutaredoxin-1	700200664	174017464	1673573876	8.49264e+08	29.6616			72352344		72352344	26.1085				54464092	54464092	25.6988								8475142060	32.9806		117581428	324275250	431453680	2.91103e+08	28.117		1098474444		1549468452	1323971448	30.3022				30411195	30411195	24.8581		520747620	421710776
RXN06610.1	A0A498LEH5	Fibrinogen gamma chain-like protein	545597226	3058680272	1328157386	1.64414e+09	30.6147		2.08644e+09	143969504	3.67588e+09	1.96876e+09	30.8746		2307435481	566365815	6612362092	3.16205e+09	31.5582		3.25766e+07	63974270	117405387	7.13188e+07	26.0878		3909941197	31.8645		844311975	5681511324	1.6261e+09	2.71731e+09	31.3395		1341707519	181876606	1508767026	1010783717	29.9128		213171724005	22257142523	459555734075	2.31662e+11	37.7532		9.56219e+09	44059580297
RXN08994.1	A0A498LQK4	Septin-2	432160453	208562038	307981550	3.16235e+08	28.2364		1.2484e+09	196544207	2271008016	1.23865e+09	30.2061		234799193		310138954	2.72469e+08	28.0215		2.27266e+07	86939268	3.41076e+07	4.79245e+07	25.5143		1041250317	29.9557		8.44986e+08	7.81267e+08	7.72751e+08	7.99668e+08	29.5748		339077643	87829198	355670381	260859074	27.9587		35315612	137453604	442562592	2.05111e+08	27.6118		263767919	521284213
RXN08731.1	A0A498LL52	Ras-related Rab-2A	1178240056	697774356	4047094248	1.97437e+09	30.8787		3801405126	4016085574	6.72623e+09	4.84791e+09	32.1747								1.25911e+08	6.00572e+07	1.11726e+08	9.92314e+07	26.5643		8.69904e+08	29.6963		6.59578e+08	906420181	1592751090	1.05292e+09	29.9717		1202708975	536148693	248425612	662427760	29.3032		463138189	539544436	9.59821e+08	6.54168e+08	29.2851		4.95181e+08	924258089
RXN29458.1	A0A498LLY7	Semaphorin-3ab-like isoform X1	1042796162	932018234	5064068078	2346294158	31.1277		214379426	1.88806e+09	609039254	9.03825e+08	29.7515			73816080	323805830	198810955	27.5668			3.41444e+07	73891114	5.40177e+07	25.6869		408344275	28.6052			1385243775	2.07833e+09	1.73178e+09	30.6896		4522270887		2738066252	3.63017e+09	31.7574		538346911	356901028	588438055	494561998	28.8816		1069175086	498629362
RXN04361.1	A0A498N7R3	Mimecan	604499597	92658762	191072220	2.96077e+08	28.1414								5.4935e+08	109595064	788931768	4.82626e+08	28.8463			3.84332e+06	3.48462e+06	3.66397e+06	21.805		147624372	27.1374		2.08804e+08	316257948	1192712542	5.72591e+08	29.0929		404060416		2922455478	1663257947	30.6314			76877392		76877392	26.1961		45036620	8.15135e+08
RXN24822.1	A0A498P5M2	Voltage-dependent anion-selective channel 2	2260147292	1096605650	2666174386	2.00764e+09	30.9029		1.0693e+10	7.00642e+09	1.84403e+10	1.20466e+10	33.4879		1079588156	2496984752	782155862	1452909590	30.4363		1.25921e+10	11264901256	2.24433e+10	1.54334e+10	33.8453		14042530712	33.7091		4857800289	5795943738	14396501959	8.35008e+09	32.9591		6235230944	1155070288	5235035712	4208445648	31.9706		11302503020	8721029046	17599921641	1.25412e+10	33.546		16573055555	1.38942e+09
RXN09030.1	A0A498LLC0	Adenosylhomocysteinase	354286040	810409569	7.95862e+08	6.53519e+08	29.2837			387930455		387930455	28.5312		1061703650	45815560		553759605	29.0447		7.26117e+08		8.18934e+08	7.72525e+08	29.525		153849710	27.1969		2301243434	2120438836	8.91114e+08	1.77093e+09	30.7219									1609202793		1609202793	30.5837			826139746
RXN06260.1	A0A498LDE8	Disulfide-isomerase A6-like protein	291861506	325422336	400957528	339413790	28.3385		82055467	11166120	242534816	111918801	26.7379		146480088		492898822	319689455	28.2521		2.16243e+09	1.02233e+09	3.04622e+09	2.07699e+09	30.9518		2146058361	30.999		1131388049	1146675172	1.02485e+09	1.10097e+09	30.0361		8.32938e+08	98045244	1.48171e+09	8.04232e+08	29.583		121493385	298462219	1.96073e+08	2.05343e+08	27.6135		566634309	7.40729e+08
RXN24735.1	A0A498N767	Coactosin	2682679808	2825883344	5760318131	3756293761	31.8067		331233954	1568888472	958212053	9.52778e+08	29.8276			124394492	216313530	170354011	27.344		4.0762e+06	2.26539e+07		1.33651e+07	23.672		14359916352	33.7413		8042560351	6260527471	3603523422	5.96887e+09	32.4748		1318016140	234922188	503328342	6.85422e+08	29.3524		59387446	375824856	277065971	237426091	27.8229		3472810359	980303578
RXN34453.1	A0A498MZU2	Ras-related Rab-5A	964726157	136094410	4713797634	1938206067	30.8521		2092851591	1381844988	4.03353e+09	2.50274e+09	31.2209		46525928			46525928	25.4715		3.18133e+09	6.98557e+06	1.68122e+09	1.62318e+09	30.5962		119788952	26.8359		738669782	5.66529e+08	29235013	4.44811e+08	28.7286			77245952	177608064	127427008	26.9251		446119416	258123042	438924181	3.81056e+08	28.5054		42504041	169288218
RXN33533.1	A0A498NNQ1	Serum deprivation-response-like protein	4.10374e+08	95661487	322503659	2.7618e+08	28.041								23010036	9445646	10201389	1.4219e+07	23.7613		12939333	2.98297e+07	3963547	1.55775e+07	23.893		536356852	28.9986		71155696	1.33e+08	55493983	8.65498e+07	26.367		31729036			31729036	24.9193			1138524823	8.71818e+07	6.12853e+08	29.191			3.68112e+08
RXN34516.1	A0A498NRW6	4-trimethylaminobutyraldehyde dehydrogenase	1070078581	1758296265	2475127892	1767834246	30.7193		2.22219e+09	435455594	2975466981	1.8777e+09	30.8063		1728788819	1.33828e+08	4443291509	2.10197e+09	30.9691		512023531	7.62493e+08	780605085	6.85041e+08	29.3516		3606543770	31.748		1.01262e+09	1.0486e+09	291796945	784340777	29.5469		4807670150	5417573736	5909571105	5.37827e+09	32.3245		3.25924e+09	1619168100	3077653376	2.65202e+09	31.3044		4.485e+09	1.61571e+09
RXN06017.1	A0A498LK83	Gamma-glutamyltransferase 5-like protein	437259765	10069662	2484703032	977344153	29.8643		9.7702e+07		256898212	1.773e+08	27.4016																									102512432	102512432	26.6112
RXN09778.1	A0A498LMX1	Ras-related Rab-7a-like protein	409878572	77704964	2223080816	903554784	29.751		100609974	2557299838	3.11129e+08	9.8968e+08	29.8824														2165705856	31.0122		68959216	543215928		306087572	28.1894										41528152	41528152	25.3076		416201047	74960848
RXN16746.1	A0A498MCA2	14-3-3 zeta delta-like protein	5.19903e+08	45366406	1164385157	5.76552e+08	29.1029		1644015605	19856129636	3.88897e+09	8.46304e+09	32.9785		193291128	207518296	454887776	285232400	28.0876		1.73425e+08	27416367	133040540	1.11294e+08	26.7298		948301820	29.8208		118357966	313737255	249197712	2.27098e+08	27.7587		860084160	5.34739e+06	187136912	3.50856e+08	28.3863		193529688	322069720	159494900	225031436	27.7456		129558685	368110124
RXN03456.1	A0A498L9A3	Ribosomal_S17_N domain-containing protein	2213438856	175873500	2598172390	1.66249e+09	30.6307		1042738236	167287288	2295094417	1.16837e+09	30.1219		43817232	26156314	172998592	8.09907e+07	26.2713		6.26917e+09	2.83983e+09	3.71995e+09	4.27631e+09	31.9937		284421353	28.0835		8.939e+08	1423536324	2948014560	1.75515e+09	30.7089		733198876		360017682	546608279	29.0259		1301465496	301513499	8.03554e+08	8.02178e+08	29.5793		3.59603e+08	569367497
RXN30806.1	A0A498NG47	Phosphatidylethanolamine-binding 1	1348207978	368294568	2493548368	1.40335e+09	30.3862		2516305888	3004403862	7455746065	4.32549e+09	32.0102			104698204	270017192	187357698	27.4812		116211423	4.15537e+08	1.18195e+08	2.16648e+08	27.6908		59730072	25.832		297092146	164869735		2.30981e+08	27.7832		222750456		119590194	171170325	27.3509		220564326	1251829086	1443458152	9.71951e+08	29.8563		281951848	2.26602e+08
RXN39338.1	A0A498ME18	Basement membrane-specific heparan sulfate proteoglycan core-like protein	857128845	64219976	1436246246	7.85865e+08	29.5497								1.54827e+08		697864720	4.26346e+08	28.6674								1.24477e+08	26.8913		83224510	4.091e+07	63680542	6.2605e+07	25.8998		95453300		90328720	92891010	26.469		197065296	220583504	451507133	2.89719e+08	28.1101		1.47209e+09	5.00343e+08
RXN16222.1	A0A498MA04	Drebrin A isoform X1	2.64701e+08	5.42806e+07	704732702	3.41238e+08	28.3462		5.0347e+06		24796409	1.49156e+07	23.8303		12515262			12515262	23.5772		2.3273e+06			2.3273e+06	21.1502		34326300	25.0328			1.07177e+07	73949889	4.23338e+07	25.3353		62824672		144454320	103639496	26.627				3.06893e+06	3.06893e+06	21.5493			130487028
RXN04474.1	A0A498LD80	von Willebrand factor A domain-containing 7-like protein	1190044400	895482132	1394334268	1159953600	30.1114		6.61788e+08	1143852810	1584436240	1.13003e+09	30.0737				12103856	12103856	23.529		6038116	6.61348e+07	6.00754e+06	2.60602e+07	24.6353		3859146672	31.8456		216848682	679585562	142260652	346231632	28.3672		1886858264	1.07276e+08	1263169530	1.08577e+09	30.0161		321388038	275264852	477696734	3.58117e+08	28.4159		853779680	400495470
RXN10980.1	A0A498LS35	40S ribosomal S16	3364750302	1614323584	9371343376	4.78347e+09	32.1554		170603329	4.37596e+08	5.63333e+08	3.90511e+08	28.5408				111002778	111002778	26.726		1317652055	967940331	4.05056e+08	8.96883e+08	29.7403		8026820487	32.9022		2014652626	3163823642	4178257340	3.11891e+09	31.5384		2527393664	7.71374e+07	2265964004	1.6235e+09	30.5965		336695614		757548644	547122129	29.0273		1.24209e+09	975508117
RXN07254.1	A0A498LKM6	Bifunctional heparan sulfate N-deacetylase N-sulfotransferase 1-like protein	3.20329e+09	352690652	2957381904	2.17112e+09	31.0158		546654115	238917910	2703928791	1.16317e+09	30.1154		218374798	81799892	288098298	196090996	27.5469		4377747332	3.78158e+09	3.73901e+09	3.96611e+09	31.8851		2859460238	31.4131		4313879175	1198796337	4.23872e+09	3.25047e+09	31.598		909176894		434700472	671938683	29.3238		1188417872	452533132	1.67971e+09	1.10689e+09	30.0439		7.64829e+08	1.21724e+09
RXN10356.1	A0A498LTB1	Myosin heavy fast skeletal muscle-like protein	239960913	21289092	259119684	173456563	27.37				1148710402	1148710402	30.0974			7906232338		7906232338	32.8803								158392184	27.2389		3.2873e+10	130163580	4.14015e+10	2.48016e+10	34.5297														1.01543e+09
RXN17179.1	A0A498M899	Aggrecan core-like protein	729026912	192444627	741561239	5.54344e+08	29.0462									5178904		5178904	22.3042											4.02615e+08	2.09635e+08	286085338	299444876	28.1577									137842463		137842463	27.0384			134231013
RXN08249.1	A0A498LIT3	Podocan-like isoform X1	1014673168	4.54486e+06	601069456	5.40096e+08	29.0086								143993174			143993174	27.1014																														12223100
RXN24610.1	A0A498MV63	Vitelline membrane outer layer 1-like protein	982228192	109730996	569223492	553727560	29.0446				23172286	23172286	24.4659				172509760	172509760	27.3621		1.46629e+07	123064736	9.33652e+06	4.90214e+07	25.5469		310601618	28.2105		133836507	132564024	379682542	2.15361e+08	27.6822		830319012	56073136	778484692	5.54959e+08	29.0478		2721691382		3175876236	2948783809	31.4575		356223017	2197214714
RXN37381.1	A0A498NZP2	Phosphotriesterase-related	373761698	130199220	576815542	360258820	28.4245		1.77956e+07		224856441	1.21326e+08	26.8543		265542158	17669546	27863334	1.03692e+08	26.6277		7169803	1.95497e+07	27545453	1.80883e+07	24.1086		5.65481e+08	29.0749		6.93885e+07	349620138	57982129	1.58997e+08	27.2444		1004390342	631561012	1221694331	9.52549e+08	29.8272		678186183	86155045	1522217216	762186148	29.5056		4497069171	4.0096e+08
RXN03624.1	A0A498LAX2	40S ribosomal S5	1.59989e+09	681900608	5148138131	2.47664e+09	31.2057		315397406	298530260	7.37454e+08	4.5046e+08	28.7468		72319928	23376210	326212260	1.40636e+08	27.0674		2.44709e+09	1.36007e+09	2.05116e+09	1.95277e+09	30.8629		1994933807	30.8937		1953032028	292323899	2.77945e+09	1.67494e+09	30.6415		5.48399e+09	96194770	2593696294	2.72463e+09	31.3434		114485741	476855876	6.02217e+08	3.97853e+08	28.5677		253339377	8.0296e+08
RXN24490.1	A0A498MUU6	Ras-related Rab-7a-like protein	56748148	1027465975		5.42107e+08	29.014		2403226422	649220544	3.8073e+09	2.28658e+09	31.0905			51104881	117419160	8.4262e+07	26.3284		145357177	5.52995e+07	111782175	1.04146e+08	26.634		56393836	25.749		621407104		1312096499	9.66752e+08	29.8486		353033452	2260481151	313159536	9.75558e+08	29.8617		903177642	608785128	1440235373	9.84066e+08	29.8742		2.76981e+08
RXN10252.1	A0A498LRA6	40S ribosomal S19	3616085880	9.2312e+08	4474156922	3.00445e+09	31.4845		1.23064e+08	110318970	399530737	2.10971e+08	27.6525		115543808	31946498	251853048	1.33114e+08	26.9881		1299249506	668225066	611208065	859560879	29.679		4.91875e+09	32.1956		4599974536	900255952	5612344361	3.70419e+09	31.7865		1280667496	35488266	1971014219	1095723327	30.0292		269284832	695262740	199251880	3.87933e+08	28.5312		874294392	510765416
RXN03657.1	A0A498LD02	40S ribosomal S10	1252901082	370291242	1588474832	1.07056e+09	29.9957		5.21579e+07	111560152	183417570	1.15712e+08	26.786			30252092	72522290	51387191	25.6149		1.26115e+09	404420784	591361597	7.52311e+08	29.4868		1869296146	30.7998		109907212	1329094676	48912825	495971571	28.8857		3.28854e+08		4.49841e+08	3.89347e+08	28.5365			99134154	157601917	1.28368e+08	26.9357		171452613	217688245
RXN29407.1	A0A498NF37	Peroxisome proliferator-activated receptor delta-like protein	1280690148	6.23326e+08	1981186820	1.29507e+09	30.2704		1276196652	967152320	2.43486e+09	1.5594e+09	30.5383		24322218	79093584	299088182	1.34168e+08	26.9995		1.06054e+10	2.60761e+09	7.88542e+09	7.0328e+09	32.7115		1.11925e+09	30.0599		2.9082e+09	2333465658	2789714936	2.67713e+09	31.318		1.49265e+09	279420818	2.56054e+09	1.4442e+09	30.4276		303011816	1403041875	1479990151	1062014614	29.9842		1.76989e+09	8.53688e+08
RXN13896.1	A0A498M343	GTP-binding nuclear protein Ran	2155677293	453985040	5364992472	2.65822e+09	31.3078		1899436083	746868573	7.11135e+09	3.25255e+09	31.5989		67280232	342877689	490200018	300119313	28.161		1712177214	2.67972e+09	2008718885	2.13354e+09	30.9906		1611269134	30.5856		3.34734e+09	2.49253e+09	3942984033	3.26095e+09	31.6026		4169045892	403266551	1303661486	1.95866e+09	30.8672		7789408892	1622195628	7167804241	5526469587	32.3637		1634720715	1576348701
RXN19267.1	A0A498MQK3	Cofilin-2	4461782626	448969216	8464808492	4.45852e+09	32.0539		384594944	34324348	3.12781e+09	1.18224e+09	30.1389			945647	136996180	6.89709e+07	26.0395		135442672	197308254	27605598	1.20119e+08	26.8399					1518486740	312382987	383805892	7.38225e+08	29.4595		207327120	26479346	1425391047	5.53066e+08	29.0429		447110994	204223678	717892090	4.56409e+08	28.7658		1.54356e+06	188866336
RXN03499.1	A0A498L5J4	Actin-related 2 3 complex subunit 1A	615898992	32726430	392574602	3.47067e+08	28.3706			8843190		8843190	23.0761								81399876	2.99418e+06		4.2197e+07	25.3306		380665368	28.5039		4.1053e+08	4.32711e+08		4.2162e+08	28.6514		1097556272			1097556272	30.0316		76686584	41318088		59002336	25.8143		677919977	2.38817e+08
RXN30520.1	A0A498NBH4	Thioredoxin domain-containing 5	3.49499e+08	428567346	510259468	4.29442e+08	28.6779		409231481	273996756	9.64003e+08	5.49077e+08	29.0324		362574614		1520769986	941672300	29.8106		4773362999	7.41552e+09	8.68639e+09	6.95842e+09	32.6961		2509976538	31.225		350865321	1059907662	221017578	543930187	29.0188		8597475	31253140	406577645	148809420	27.1489		164989080	266476910	235359898	222275296	27.7278		1.73167e+09	3.49665e+08
RXN28068.1	A0A498N1H6	Integrin alpha-V	339647159	52638010	435733294	2.76006e+08	28.0401				9049597	9049597	23.1094														17742893	24.0807		69822276	1.46211e+07	97829520	6.07576e+07	25.8566									192632080		192632080	27.5213			2.75265e+07
RXN02675.1	A0A498LBF9	Biglycan	1151775904	3.82985e+09	1476348550	2.15266e+09	31.0035		5.11858e+07	8123230	39210497	3.28398e+07	24.9689		3116941025	351071041	2361871991	1.94329e+09	30.8559											691285973	409065616	6.59359e+08	5.8657e+08	29.1277		223583283		851159268	5.37371e+08	29.0013		123716666	246716055	227141673	1.99191e+08	27.5696		2.96016e+08	3.87375e+09
RXN27497.1	A0A498LPZ0	Creatine kinase M-type-like protein	692271146	64418190	1021556764	592748700	29.1428		7.6229e+09	4543180361	107587473	4.09122e+09	31.9299		3557011310	1003832414	39677536260	1.47461e+10	33.7796				7041492	7041492	22.7474		1190033248	30.1484		5617416073	9440284145	5.05472e+09	6.70414e+09	32.6424		13608482580	890087296	2878910750	5792493542	32.4315		14511680019	2.63522e+10	9455060619	1.6773e+10	33.9654		9.08019e+08	6.80847e+07
RXN22618.1	A0A498MMG5	Ras-related Rab-14-like protein	82324480	283772736	870664296	4.12254e+08	28.619		228686971	1886581083	4.71627e+09	2.27718e+09	31.0846			16097872		16097872	23.9404		243260841	1.06905e+08	179039270	1.76402e+08	27.3943		3.93687e+08	28.5525		2.53843e+08	177733064	748436867	3.93338e+08	28.5512		1100083746	90701066	83426178	4.24737e+08	28.662		271394390	77946076	197501476	1.82281e+08	27.4416		3.12189e+08	127124458
RXN35354.1	A0A498NUZ0	Eukaryotic initiation factor 4A-II	706051752	9.71388e+07	615639302	4.72943e+08	28.8171		108344086		176014899	1.42179e+08	27.0831				53129904	53129904	25.663				20700244	20700244	24.3031		2964805387	31.4653				1.92623e+07	1.92623e+07	24.1993		3053118002		889838828	1971478415	30.8766		8229432	35292860	148934098	64152130	25.935			149060057
RXN25434.1	A0A498N0L3	Ras-related Rab-1A	122241068	7.31706e+08	4926962460	1.92697e+09	30.8437		6.02701e+09	274839840	1927096683	2.74298e+09	31.3531		61724004		261324544	161524274	27.2672		180961734	2.12281e+08	2.1723e+08	203491097	27.6004		2453038042	31.1919		1175886296		1251345707	1.21362e+09	30.1767		3006888718	2234486032	436404102	1.89259e+09	30.8177		990996674		415653866	703325270	29.3896		1296655863	78611240
RXN11561.1	A0A498NQG1	LIM domain-containing protein	2.11129e+09	225551584	3825971192	2.05427e+09	30.936		16987364		27118310	22052837	24.3945									32188524	32371016	32279770	24.9441		428535998	28.6748			2.14047e+08	269076037	2.41561e+08	27.8478		334075288	5.1491e+08	2.07407e+09	9.7435e+08	29.8599			127204504	211533985	1.69369e+08	27.3356			191781076
RXN36780.1	A0A498M105	Disulfide-isomerase isoform X2	643776216	2285614002	1529647254	1486345824	30.4691		1.49342e+09	371258493	1.47798e+09	1.11422e+09	30.0534		1480206978	107479209	4049807305	1.87916e+09	30.8074		2.42421e+09	3.35103e+09	2844174733	2.87314e+09	31.42		9.45546e+09	33.1385		3339156802	8893187317	1422650889	4.55167e+09	32.0837		1.76054e+09	1167684863	4.07467e+09	2.3343e+09	31.1203		1630894072	2.67793e+09	1.92147e+09	2.07676e+09	30.9517		4475727650	2584427273
RXN31458.1	A0A498NI22	Voltage-dependent anion-selective channel 2-like isoform X2	1363149264	152396104	1547353766	1020966378	29.9273		1.52306e+10	15461210566	28383713885	1.96918e+10	34.1969		607099444	1546526810	766191548	9.73273e+08	29.8583		1.21676e+09	634748581	2211971970	1.35449e+09	30.3351		908276276	29.7586		541142231	371948900	1944290416	9.52461e+08	29.8271		2266305336	86755458	2347705096	1.56692e+09	30.5453		1299841900	8.14426e+09	4965066195	4.80306e+09	32.1613		2.87021e+09	263269794
RXN24819.1	A0A498MSX8	Catechol O-methyltransferase domain-containing 1-like protein	1184728976	22143363	3661033604	1.62264e+09	30.5957		3.81715e+08		1.89215e+09	1136933179	30.0825		148052300	212059600	555924052	3.05345e+08	28.1859		1.42815e+07	2.1576e+07	33904790	2.32541e+07	24.471		485513007	28.8549		107684748	425350587	236148900	256394745	27.9338		224373956	3.86799e+06	172207406	1.33483e+08	26.9921		9210110432	859377940	9.58237e+09	6.55062e+09	32.609		3.6995e+08	793292892
RXN17797.1	A0A498MJJ2	Ras-related Rap-1b	1331346308	734460984	4891919678	2.31924e+09	31.111		1584490636	982965281	2135814861	1567756926	30.5461		47867768		297557704	172712736	27.3638		16969844		13153959	1.50619e+07	23.8444		368844600	28.4584		8.35626e+08	6.62051e+08	1375311938	9.57663e+08	29.8349		2419923488	6.21958e+08	2043882824	1.69525e+09	30.6589		417100175	623193242	508172413	5.16155e+08	28.9432		400004875	316284732
RXN32681.1	A0A498NLG8	Peptidyl-prolyl cis-trans isomerase (EC 5.2.1.8)	1267118136	79110675	695555688	680594833	29.3422		322997563	579980518	1359955356	7.54311e+08	29.4906									27403849		27403849	24.7079		23506254	24.4865		2.26171e+08		138580056	1.82376e+08	27.4423				289905890	289905890	28.111		82887656	127069780	108818684	1.06259e+08	26.663		1.9235e+08	100454292
RXN25957.1	A0A498NAW3	L-xylulose reductase	546580714	1.52881e+08	797028137	4.9883e+08	28.894		4.10094e+06		29410079	1.67555e+07	23.9981														66133792	25.9789		4.99145e+07	36369856	2.92652e+07	3.85165e+07	25.199		290990351		125809559	208399955	27.6348			113026834		113026834	26.7521		2.34347e+08	7778426
RXN24842.1	A0A498MZB8	Sidoreflexin	555084332	4.68604e+07	405299700	3.35748e+08	28.3228		7434050197	3577266470	1.41804e+10	8.39725e+09	32.9673		333688192	4.12373e+07	366260490	2.47062e+08	27.8803		4.20312e+08	4.59444e+07	8.29354e+08	4.3187e+08	28.686		313275474	28.2229		3.24732e+08	350421737	4.94814e+08	389989409	28.5389		462464217	24584116	331528560	2.72859e+08	28.0236		481994668	1.88741e+09	1393604894	1.25433e+09	30.2243		1.1988e+09	2.18489e+08
RXN12809.1	A0A498LWE3	LIM and SH3 domain 1-like protein	1194602001	441842892	1.46349e+09	1.03331e+09	29.9446		3014864410	3902617964	7096905151	4.67146e+09	32.1212		560450876	290164956	335942376	3.95519e+08	28.5592		107103353	1.70419e+08	2.82477e+08	1.86667e+08	27.4759		1159975981	30.1114		1359693686	1396578933	2.96162e+09	1.90596e+09	30.8279		732071126	170012512	770485624	5.57523e+08	29.0545		714402233	417878414	1889885364	1.00739e+09	29.908		1.54458e+09	1.43756e+09
RXN15428.1	A0A498M3J2	Tetranectin-like protein	7009657705	119803912	464719448	2.53139e+09	31.2373																																			12774924			12774924	23.6068			52286854
RXN09631.1	A0A498LNL3	Chondroadherin-like protein	1088469236	414150798	435910472	6.46177e+08	29.2674								37563419	66518230	200308008	101463219	26.5964
RXN24809.1	A0A498MSX4	Annexin	3718005991	320088067	6293987376	3.44403e+09	31.6814		80258241		1.07001e+08	9.36295e+07	26.4805		750324522		1234901778	992613150	29.8867		9.80279e+07	115953577	2.21549e+08	1.45177e+08	27.1132		3240438935	31.5935		1681488217	2995163475	2790138144	2.48893e+09	31.2129		2227045214	28089356	2704562553	1.65323e+09	30.6226		1685902616	917613719	4002212993	2201909776	31.0361		1.9959e+09	2.56263e+09
RXN31470.1	A0A498NHY4	3-ketoacyl-mitochondrial	190393904	227978828	1.9346e+08	2.03944e+08	27.6036		8.41384e+08	6.03227e+08	3948293090	1.79763e+09	30.7435		119226981	6.84101e+06	769284599	2.98451e+08	28.1529		6.97605e+09	4.37266e+09	9.30387e+09	6.88419e+09	32.6806		1993266422	30.8925		1.22131e+09	3033537255	1.32276e+09	1.8592e+09	30.792		1.33102e+09	288452334	2.09289e+09	1237453992	30.2047		578177123	6420872263	3.05168e+09	3.35024e+09	31.6416		7119455144	386739710
RXN23628.1	A0A498MQ19	Neuropilin-1a isoform X1	345944730	124018396	706660230	3.92208e+08	28.547		1.71428e+08		6.93786e+07	120403378	26.8433		63055855		128832932	9.59444e+07	26.5157								77478356	26.2073		52418440	72873733	4.78501e+07	5.77141e+07	25.7824		294030764		33492676	163761720	27.287			24668660		24668660	24.5562		28374312	2.23739e+08
RXN18595.1	A0A498MN94	Protein-L-isoaspartate O-methyltransferase (EC 2.1.1.77)	559915194	6.81312e+07	1159118890	5.95722e+08	29.1501		3.06976e+08	270110977	576544640	3.84544e+08	28.5186			62496186	385836152	224166169	27.74			6.20739e+07		6.20739e+07	25.8875		47895066	25.5134		124444938	25984106	6.77949e+07	7.27413e+07	26.1163				243646938	243646938	27.8602		139583078	264317596	5.9444e+08	3.3278e+08	28.31		36831512	89818120
RXN02948.1	A0A498L4B7	ATP-dependent 6-phosphofructokinase (ATP-PFK) (Phosphofructokinase) (EC 2.7.1.11) (Phosphohexokinase)	75416711	203821700	384636012	2.21291e+08	27.7214		1718156106	131924352	1806827891	1.21897e+09	30.183		134790512		647384808	391087660	28.5429				28163888	28163888	24.7473						62352439		62352439	25.8939								464332593	6.62606e+08	597268729	5.74736e+08	29.0983			28797612
RXN27351.1	A0A498N3L1	Saccharopine dehydrogenase-like oxidoreductase	1.501e+08	97815501	400171854	2.16029e+08	27.6867		701948170	1.01663e+08	9.53489e+08	5.857e+08	29.1256		74129660	14002932	262618316	1.16917e+08	26.8009				97285464	97285464	26.5357		8.61044e+08	29.6815		75046768	69240170	183128995	1.09139e+08	26.7016		7.12082e+08		902401636	8.07242e+08	29.5884		359040358	207448542	2.15118e+08	2.60536e+08	27.9569		164077392	4.07984e+07
RXN32895.1	A0A498NLX8	Intermediate filament ON3-like protein	106426704	714208040	112636400	3.1109e+08	28.2128										105323144	105323144	26.6502			18663888		18663888	24.1537		3427872500	31.6747		85660132	2.50195e+09	254487984	9.47367e+08	29.8193		488545024	105576288	443922048	3.46014e+08	28.3663		31607814	284534602	35424656	117189024	26.8043		158830544	435764560
RXN35231.1	A0A498NTK4	Elongation factor 1-gamma	5.25632e+08	4.43367e+08	1506474918	8.25158e+08	29.6201		2.13109e+09	768849518	2.30243e+09	1.73413e+09	30.6916		641845362	120016756	1059185920	6.07016e+08	29.1772		2.93628e+09	8.8076e+08	3.17975e+09	2.33226e+09	31.1191		3139824300	31.548		2344232620	1.86908e+09	1996789634	2.07003e+09	30.947		3758490660	1.2947e+09	1127572566	2.06025e+09	30.9402		1583553810	925877012	1316544213	1.27533e+09	30.2482		2.37375e+09	1352115519
RXN26430.1	A0A498N022	Proteasome activator complex subunit 1	695101844	101524904	1172947436	656524728	29.2903		61791963	233258519	165700631	1.53584e+08	27.1944		21922154	6.57118e+07		4.3817e+07	25.385								2.88417e+09	31.4255		1.29037e+09	2.43777e+09	992412712	1.57352e+09	30.5513		3057233060	291821408	3647408499	2.33215e+09	31.119		1939771715	738322812	2.51664e+09	1.73158e+09	30.6894		1.95357e+09	765478817
RXN04355.1	A0A498LG23	Pyruvate dehydrogenase E1 component subunit beta (EC 1.2.4.1)	457694446	122615368	567708508	382672774	28.5115			9409835682		9409835682	33.1315		1134515350	1.02468e+09		1.0796e+09	30.0078				3454550612	3454550612	31.6859		1382690147	30.3648		9.82254e+07	1.51201e+09	1366873262	9.92371e+08	29.8863		1087322044	135172506	2075733295	1.09941e+09	30.0341		2098827456		3.65162e+09	2.87523e+09	31.421		4.42422e+09	3.95882e+08
RXN08524.1	A0A498LP25	EF-hand domain-containing D2	548852326	132883420	1672914237	7.84883e+08	29.5479		2.88046e+08	374416830	1040229785	5.67564e+08	29.0802				26817474	26817474	24.6767		7070978	2.4102e+07	7.05264e+07	3.38998e+07	25.0148		930596523	29.7936		1.2719e+09	4.06777e+08	1.13605e+09	9.38244e+08	29.8054		876703295		94439123	485571209	28.8551		37743468		336166593	1.86955e+08	27.4781		2.38847e+08	183472136
RXN13157.1	A0A498M7J9	Katanin p60 ATPase-containing subunit A-like 1	668275261	593853887	3007756066	1.4233e+09	30.4066		384955339	1596468224	2039959604	1.34046e+09	30.3201		178169327	1.75409e+08	397895248	2.50491e+08	27.9002		7.05229e+06	34514295		2.07833e+07	24.3089		1.25367e+09	30.2235		2910551177	2150118343	6.02891e+09	3.69653e+09	31.7835				597194958	597194958	29.1536		721870044	1495950081	1.40315e+09	1.20699e+09	30.1688		4.31925e+08	4.62002e+08
RXN27159.1	A0A498LEZ7	Periostin isoform X1	414840631	36168800	1174784634	541931355	29.0135		684536959			684536959	29.3506		663922554		1066901721	8.65412e+08	29.6888								51015356	25.6044		4.64146e+08	4.60217e+08	5.04359e+08	4.7624e+08	28.8271		873366117		2080337414	1.47685e+09	30.4599		499808524	1032090686	6.82482e+08	7.38127e+08	29.4593		13092925	1556306958
RXN32728.1	A0A498NLU9	40S ribosomal protein S4	1.39237e+09	272850530	2750472474	1.4719e+09	30.455		1.83334e+09	1123943505	4597567857	2.51829e+09	31.2298		549674602	549397214	435496020	511522612	28.9302		7.96872e+09	5.2185e+09	9.56492e+09	7.58405e+09	32.8203		1711499081	30.6726		3.27142e+09	2.6406e+09	2.67209e+09	2.86137e+09	31.4141		5004085174	80982867	3983014217	3022694086	31.4932		739210547	6.80871e+08	4.06634e+09	1828806481	30.7683		2.93679e+09	1.85124e+09
RXN27095.1	A0A498NCD5	Peroxiredoxin (EC 1.11.1.15)	4835985610	854034278	4281100979	3.32371e+09	31.6301		443044708	1718618428	1.41232e+09	1.19133e+09	30.1499		179724246	164150500	667178168	337017638	28.3282								2.41966e+09	31.1722		1.21464e+09	261608340	1.50047e+09	9.92239e+08	29.8861		550296744		174786441	3.62542e+08	28.4336		27464100	147191532	53020827	75892153	26.1774		885928544	211430590
RXN23519.1	A0A498MPP7	Transitional endoplasmic reticulum ATPase	163681535	421794753	6.68567e+08	4.18014e+08	28.639		5291861112	768450819	9.44461e+09	5.16831e+09	32.267		2183319103	445607010	8329590275	3652838796	31.7664		5.16187e+09	2.96168e+09	4899099305	4.34088e+09	32.0153		2116955139	30.9793		2.06818e+09	2600524868	7.29501e+08	1.7994e+09	30.7449		5194795805	14171014	767100038	1.99202e+09	30.8916		1520737787	921333190	3637927581	2026666186	30.9165		1.90807e+09	1.05673e+09
RXN34432.1	A0A498NQT4	Epiplakin-like protein	182684383	4.29254e+08	1075668744	5.62536e+08	29.0674		5.98612e+07	2.77796e+06	85460188	4.93665e+07	25.557		441882594	1.18919e+08	612607943	3.91137e+08	28.5431		3.21008e+08		3.76874e+08	3.48941e+08	28.3784		7.04943e+09	32.7149		7047064451	9.91431e+09	7.49924e+09	8.15354e+09	32.9248		3312211355	451324360	3.56266e+09	2.44207e+09	31.1855		314375009	660768062	1.31386e+09	7.63e+08	29.5071		758024978	824904966
RXN05512.1	A0A498LBB3	60S ribosomal L23	2276459890	1033119744	3174546838	2.16138e+09	31.0093		1.43663e+08	372129501	301761236	2.72518e+08	28.0218		59531020	64627952	313895360	1.46018e+08	27.1216		5.85605e+08	293944228	2.02762e+08	3.6077e+08	28.4265		3273389078	31.6081		2660252967	1917957697	2.14587e+09	2.24136e+09	31.0617		2346255981		1229971340	1.78811e+09	30.7358		74171960	289143952	136679950	1.66665e+08	27.3124		1.33335e+09	579337316
RXN12857.1	A0A498M6P1	Mitogen-activated protein kinase (EC 2.7.11.24)	296703944	67537263	265348348	209863185	27.6449		3040952308	397014670	5.0534e+09	2.83046e+09	31.3984		88560818	9759709	1465018752	521113093	28.957				85223421	85223421	26.3447		1306925200	30.2835		4.7851e+08	601244849	5.17425e+08	5.32393e+08	28.9879		535454150	256156844	438677253	4.10096e+08	28.6114		28625221	8.3235e+07	2.92321e+08	1.34727e+08	27.0055		4.71599e+08	5.3365e+08
RXN26577.1	A0A498NC80	Leukocyte elastase inhibitor-like protein	363300701	25506064	525170184	304658983	28.1826				14201192	14201192	23.7595		1163471644	42781677	942233828	716162383	29.4157			216705213		216705213	27.6912		5158031434	32.2642								6.358e+08	194059831	5.28897e+08	4.52919e+08	28.7547				10444395	10444395	23.3162
RXN26621.1	A0A498N1I5	Galectin	13568008044	2968127280	18161859600	11565998308	33.4292		91807432	124714000	151901476	122807636	26.8718														620063376	29.2078		536425584	437389712	950552400	6.41456e+08	29.2568		6042647584	55050028	4285298292	3.461e+09	31.6885			123574664	68754072	96164368	26.519			2158763257
RXN06699.1	A0A498NAJ1	Parvalbumin beta	2.06273e+08	371449456	476799312	3.51507e+08	28.389		46467692	1941270834		993869263	29.8885		407871615	112443306	1239928884	586747935	29.1282								2444036548	31.1866		4955985150	3764059227	3427785508	4.04928e+09	31.915		67309278		425199468	246254373	27.8756			690607624	10112886	350360255	28.3843		913821094
RXN08379.1	A0A498LJ48	Tenascin-like isoform X4	75111664	181144846	533169589	263142033	27.9713																															97284520	97284520	26.5357
RXN08460.1	A0A498LJP3	Profilin	4465218098	2382059266	11022224036	5.9565e+09	32.4718		98393226	2904836648	78433099	1027220991	29.9361		86396960	169790203	853880920	3.70023e+08	28.463								8733270464	33.0239		31152891959	1.2533e+10	8.66692e+09	1.74509e+10	34.0226		5768538827	355198457	3946767447	3.35683e+09	31.6445		155472892	781052397	75587168	337370819	28.3298		14708669768	6723650079
RXN29242.1	A0A498NBD6	60 kDa heat shock mitochondrial	9.16955e+07	289568510	76597009	1.5262e+08	27.1854		6.05616e+09	1.4096e+09	7.34358e+09	4.93645e+09	32.2008		1.56595e+09	116668786	5249307983	2.31064e+09	31.1056		7.08894e+09	9.95909e+09	8.92127e+09	8.65643e+09	33.0111		3131074766	31.544		1332905348	1.49245e+09	387496131	1.07095e+09	29.9962		3431180191		1.30987e+09	2.37052e+09	31.1426		1205776252	4049410599	1.71444e+09	2.32321e+09	31.1135		4.52282e+09	9.43071e+08
RXN25509.1	A0A498MUC4	Sorbin and SH3 domain-containing 2-like protein	522875218	34161472	1180528912	579188534	29.1095															1.15157e+07	12075914	1.17958e+07	23.4918		54600620	25.7024								279766624		745678474	512722549	28.9336		260953146	1199907061	204189757	5.55017e+08	29.048			2.82196e+08
RXN22333.1	A0A498MR69	Actin-related 2 3 complex subunit 4	6989128500	794703850	10734731584	6.17285e+09	32.5233		1357108500	1643784016		1500446258	30.4827								21582769	9.49505e+07	78863184	6.51322e+07	25.9569		2289601218	31.0924		2.43524e+09	1270777322	3.03372e+09	2.24658e+09	31.0651		3002009644	1137417698	2264164354	2.13453e+09	30.9913		1259023936	1.94373e+08	1.09726e+09	8.50217e+08	29.6633		1482403952	674708911
RXN23912.1	A0A498MWB3	Alpha-2-macroglobulin-like protein	43117660	96064719	59208708	6.61304e+07	25.9788		141655550		3.38166e+08	2.39911e+08	27.8379		395538078		575377027	4.85458e+08	28.8548								69687822	26.0544		64928803	1.60638e+08		1.12783e+08	26.749		253303179		935078832	5.94191e+08	29.1464		84986575610	184202038	6.64314e+10	5.05341e+10	35.5565		117800936	1.82794e+10
RXN29028.1	A0A498N4I9	Pleckstrin homology domain-containing family M member 3-like isoform X1	109692159	14643764	1.53655e+08	9.26636e+07	26.4655		5.05943e+09	998926286	8.02392e+09	4.69409e+09	32.1282		3.17591e+08		1161457107	7.39524e+08	29.462								1.56985e+09	30.548		281363389	433207814	140231031	284934078	28.0861		1.72766e+09	355080471	1736168892	1.27297e+09	30.2456		964353911	196616734	1.12138e+09	7.60782e+08	29.5029		5.13412e+09	6.88396e+08
RXN17410.1	A0A498MAY9	Septin-8-like isoform X2	3.77706e+08	112810874	648697410	3.79738e+08	28.5004		2.01241e+08	40873052	220097807	1.54071e+08	27.199		32782892		218492518	125637705	26.9047		6552786		14217221	1.0385e+07	23.308		1.78044e+08	27.4077		1.41743e+08	9.76128e+07	139580839	1.26312e+08	26.9124		260353878		227916105	2.44135e+08	27.8631		16126387	106169852		6.11481e+07	25.8658		72636337	2.21245e+08
RXN18990.1	A0A498MFQ8	LanC 1	5.43242e+08	62175620	425307710	3.43575e+08	28.3561		5.96428e+08	248844376	1.07372e+09	6.39664e+08	29.2527		1110419473	88005276	2201545984	1.13332e+09	30.0779				6.0336e+06	6.0336e+06	22.5246		210361874	27.6483		1.29992e+10	1.06726e+10	7690295038	1.0454e+10	33.2833		52816766	158971884	1993489499	7.35093e+08	29.4534		14654864		9.76807e+07	5.61678e+07	25.7432		8.02381e+08	8.0214e+06
RXN36279.1	A0A498NXD1	S-methyl-5-thioadenosine phosphorylase	1.60381e+09	261666711	1659866864	1.17511e+09	30.1302		5.92372e+08	852797796	1.49697e+09	9.80713e+08	29.8693		29553800	85748122	21110714	4.54709e+07	25.4384		103838305	340120295	126381396	190113332	27.5023		1039159792	29.9528		515475082	384597314	399279774	433117390	28.6902		275058786	501839264	950010776	5.75636e+08	29.1006		503920112	653320066	6.73748e+08	6.10329e+08	29.185		7.40905e+08	377399122
RXN27703.1	A0A498N678	Profilin	3652741418	2.46974e+09	18018563125	8.04702e+09	32.9058		688122096	3.06567e+09	1344127910	1.69931e+09	30.6623		134496560	130072224	146519680	137029488	27.0299		70637846	140759447	35241639	8.2213e+07	26.2929		5787729671	32.4304		1069037025	613238296	4.01674e+08	6.9465e+08	29.3717		3446766512		2603965219	3.02537e+09	31.4945		443944236	302121886	6.11709e+08	4.52592e+08	28.7536		1483485236	604646989
RXN25129.1	A0A498MTK3	Lysine 6-oxidase-like protein	1.54785e+08	15977054	658221984	2.76328e+08	28.0418
RXN27399.1	A0A498MZB2	F-actin-capping protein subunit alpha	1251155390	2.55898e+08	1968064596	1.15837e+09	30.1095		1306537972	1120334844	3031914712	1.8196e+09	30.761		453440768	187705516	37972452	226372912	27.7541		329723297	2.92642e+08	733675418	4.52014e+08	28.7518		2432090907	31.1796		949062028	2.20457e+09	2.34547e+09	1.83303e+09	30.7716		1394506064		403173500	898839782	29.7435		375850366	756455598	1354595642	828967202	29.6267		1786965836	1079555747
RXN10328.1	A0A498LPH1	60S ribosomal L7a	1094796314	170147536	2590583604	1285175818	30.2593		1.14034e+09	1181697992	4.33354e+09	2.21852e+09	31.047		559173744	4.05963e+08		4.82568e+08	28.8462		11567744895	4.33554e+09	1.81557e+10	1.1353e+10	33.4024		1256613404	30.2269		3505752310	2447763940	5162808619	3705441623	31.787		1223543600	112771784	1819291380	1.05187e+09	29.9703		1553199792	606604641	3728893784	1.9629e+09	30.8703		2.83137e+09	1515762436
RXN11708.1	A0A498LTB6	Rab GDP dissociation inhibitor	109804292	112793026	483087164	2.35228e+08	27.8095		3.34741e+10	1650681903	3.86999e+10	24608242980	34.5184		2729139686	109790654	2659455037	1.8328e+09	30.7714								158289276	27.238		24920871	22149716	8809322	1.86266e+07	24.1509		6.20507e+08		118510372	3.69509e+08	28.461		142369995		1128145813	635257904	29.2428			9.01848e+08
RXN17207.1	A0A498MJQ7	Filamin-binding LIM 1	53562176	1.04922e+08	129513784	9.59993e+07	26.5165																				160719068	27.26		6.77297e+07	62880146	209587360	1.13399e+08	26.7568			17681490		17681490	24.0757			32835590		32835590	24.9688			2.34734e+07
RXN23368.1	A0A498MPE2	Creatine kinase U-mitochondrial-like protein	151088925	18048078	2.22831e+08	1.30656e+08	26.9612								59647654	6860363	2.36485e+08	1.00998e+08	26.5897											186944276	3.20833e+08		2.53889e+08	27.9196			937962622		937962622	29.805		3.47429e+07		488064378	2.61404e+08	27.9617			34480916
RXN28802.1	A0A498NAE7	Drebrin isoform X1	225868072	28795776	258973866	1.71213e+08	27.3512		7.81813e+08	176484777	1.66336e+09	8.73884e+08	29.7029		1.32155e+08		685877890	4.09017e+08	28.6076		2.61574e+07	6.60577e+07	26750493	3.96552e+07	25.241		133815143	26.9957		230806839	356913471	46271638	2.11331e+08	27.6549				248868608	248868608	27.8908		33426656	78835821	223045387	111769288	26.7359		7.88991e+07	95847989
RXN05289.1	A0A498LAL7	Cellular retinoic acid-binding 1	914717278	367124570	2694929476	1.32559e+09	30.304		4.2198e+09	2.15311e+09	8564479268	4979130660	32.2132			53045380	127997204	90521292	26.4318											6.53535e+07			6.53535e+07	25.9618		1.67907e+09		132207674	9.05639e+08	29.7544		5.86123e+07		41066306	4.98393e+07	25.5708			1.85517e+09
RXN12801.1	A0A498LX35	Prohibitin	462093100	108736709	243927828	271585879	28.0168		1328659401	2908855938	3183152205	2473555848	31.2039		2.24335e+08	394090908	200171326	2.72866e+08	28.0236		2958160191	2.84327e+09	3.7925e+09	3.19798e+09	31.5745		1653475438	30.6229		9.28472e+08	1017025176	2.61476e+09	1.52009e+09	30.5015		1.6812e+09	101202480	7.63847e+08	8.48751e+08	29.6608		658157888	3.40922e+09	877532391	1.6483e+09	30.6183		2.4722e+09	868747988
RXN08980.1	A0A498LL74	Annexin	151955986	3479470068	354006546	1.32848e+09	30.3071		3.55963e+08	851048820	920284752	7.09099e+08	29.4014		703006511	576555220	1178387412	819316381	29.6098		65378990	183485269	81641070	110168443	26.7151		4927941962	32.1983		1.46713e+09	2.31375e+09	2391156794	2.05734e+09	30.9381		557453202	263248750	1501561670	774087874	29.5279		31785494	1033997726	1.39537e+08	4.01773e+08	28.5818		2.06505e+09	773806342
RXN18774.1	A0A498MHF5	Protocadherin Fat 4-like protein	13702800	44384738	74362984	44150174	25.3959		56611316	1017855336	340694241	4.7172e+08	28.8134														25309406	24.5932		97151930	64800072	317778978	1.5991e+08	27.2527		109875760		9858557	5.98672e+07	25.8353			76157700	59762848	67960274	26.0182		3.84334e+06
RXN25920.1	A0A498MYP0	Complement C3-like protein	31782470	112594680	155196864	9.9858e+07	26.5734		126989933		823174314	4.75082e+08	28.8236		587298301	1.46953e+08	3110054566	1.28144e+09	30.2551		3605348	6.37415e+06	3.22206e+07	1.40667e+07	23.7458		4.60568e+08	28.7788		5.53519e+07	3.08298e+08	1.5158e+07	1.26269e+08	26.9119		9918067		107847044	5.88826e+07	25.8113		2.48958e+10	1.07642e+09	22612657701	16194960651	33.9148		738748341	4.75998e+09
RXN08785.1	A0A498LTT9	Fumarate mitochondrial	8.21375e+07	54635590	50147368	6.23068e+07	25.8929		2712927065	1642286677	4069308553	2.80817e+09	31.387		893681350	53208504	1406797552	7.84562e+08	29.5473		1.40942e+09	2.32357e+09	2007162173	1.91338e+09	30.8335		483691175	28.8495		3.99381e+08	575391880	171212124	3.81995e+08	28.509		234523148		5.79883e+08	4.07203e+08	28.6012		421473403	4356705944	1138922844	1972367397	30.8773		3.98757e+09	1.94648e+08
RXN15364.1	A0A498M831	Proteasome subunit alpha type (EC 3.4.25.1)	1054009494	180981978	1267459680	834150384	29.6357		1022677808	592218039	3030748905	1.54855e+09	30.5283		133734500	274142232	121844490	1.76574e+08	27.3957		1306795751	3019946678	1.30423e+09	1.87699e+09	30.8058		1.77494e+09	30.7251		1.3614e+09	1.35389e+09	1222951593	1.31275e+09	30.2899		1400224175	89512410	855164653	781633746	29.5419		2702167069	9.24873e+08	4839448201	2.82216e+09	31.3942		8.20198e+08	5.31033e+08
RXN23916.1	A0A498N081	Alpha-2-macroglobulin-like protein	367488534	9.37859e+08	3.3114e+08	5.45496e+08	29.023		1067573274		3.20914e+09	2.13836e+09	30.9939		888611276		5142411291	3.01551e+09	31.4898			4.91948e+06		4.91948e+06	22.2301		1862888995	30.7949		5.23439e+08	1.30557e+09	1.4043e+08	6.56481e+08	29.2902		6.16098e+07	97188935	83399942	8.07329e+07	26.2667		100931130077	3986932810	6.16715e+10	5.55299e+10	35.6925		1251912151	1.54923e+10
RXN14316.1	A0A498M4D0	Sodium potassium-transporting ATPase subunit alpha-1-like protein	34623683	1.62713e+07	49914336	3.36031e+07	25.0021		9.33929e+10	2889536862	50188034178	4.88235e+10	35.5069		153289816	36633840	1034784992	408236216	28.6048				1.38431e+07	1.38431e+07	23.7227		8.66197e+09	33.012		679690294	775557959	3.15333e+08	5.90194e+08	29.1366		9743844059	14291010705	8955622757	1.09968e+10	33.3564		334772328	1.97427e+09	615345921	9.74797e+08	29.8605		4.90449e+10	9.72713e+08
RXN30785.1	A0A498NG29	Ubiquitin-conjugating enzyme E2 L3	943692456	115942520	1497691556	8.52442e+08	29.667				17459166	17459166	24.0575														1078168264	30.0059		5.53151e+06	116677216	193828313	1.05346e+08	26.6506				455965600	455965600	28.7643		56248470		238749323	1.47499e+08	27.1361		289052488	126281496
RXN28662.1	A0A498NA31	Septin-8-A isoform X1	163204530	3.2135e+08	503316956	3.2929e+08	28.2948		81279584		1.51455e+08	1.16367e+08	26.7941		18942786		141568728	80255757	26.2581		6923721			6923721	22.7231		2.88501e+08	28.104		353123583	181527829	4.81126e+08	3.38592e+08	28.335		152684118		148137302	150410710	27.1643		15060589	97384426	134922596	8.24559e+07	26.2971		2.26789e+08	334460551
RXN12547.1	A0A498M5Q0	Saxitoxin and tetrodotoxin-binding 1-like protein	314295175	123862424	238826932	2.25662e+08	27.7496		47542634		164599183	1.06071e+08	26.6605			54042936	175438940	114740938	26.7738			10871460		10871460	23.374		130645988	26.9611			147250160		147250160	27.1337								2259030180	206249724	9746032832	4.07044e+09	31.9225		96359216	1.83794e+09
RXN33530.1	A0A498NNC6	Regucalcin	5.68105e+08	2080236932	1486361286	1.37823e+09	30.3602		4.08769e+08	20687544	777718943	4.02392e+08	28.584		177975464	199283804	159335616	1.78865e+08	27.4143			15876865	20380810	1.81288e+07	24.1118		3556556868	31.7278		2.34744e+06			2.34744e+06	21.1627		6.08953e+08	280667267	218729366	3.6945e+08	28.4608		345663040	829082938	161753150	4.455e+08	28.7308		5.03744e+09	7.40158e+08
RXN17016.1	A0A498MD37	40S ribosomal S18	4172755968	1075733244	7936660711	4.39505e+09	32.0332		4.02104e+08	957836260	1116002908	8.25314e+08	29.6204		154431174	126795091	140688816	1.40638e+08	27.0674		4.09534e+09	2.44347e+09	1061109160	2533304778	31.2384		2213627753	31.0438		3.16631e+09	2024071024	6.8608e+09	4017060167	31.9035		2206871684		6.65677e+09	4.43182e+09	32.0453		216847220	1198697622	1282989881	8.99512e+08	29.7446		1.55558e+09	1707821832
RXN12652.1	A0A498LZ52	Peptidylprolyl isomerase (EC 5.2.1.8)	625917950	433874944	1063191380	7.07661e+08	29.3985		78343055	224416027	727509366	343422816	28.3554			16003967		16003967	23.9319		4.66392e+06	8.75744e+07	2458208	3.15655e+07	24.9118		2318063720	31.1103		1.08533e+09	8.95532e+08	698839832	8.93234e+08	29.7345		70575610	23072050	109826570	6.78247e+07	26.0153		62617048	1.23965e+08	43752416	7.67781e+07	26.1942		407507006	1606174253
RXN26819.1	A0A498MXR4	Alcohol dehydrogenase class-3	235590362	40131340	203718302	1.59813e+08	27.2518		9.615e+08	342888115	1.51648e+09	9.40289e+08	29.8085			9092683	30048264	1.95705e+07	24.2222		3.6604e+08	258516312	544768615	3.89775e+08	28.5381		353590918	28.3975		52919551	205490068	67389342	1.086e+08	26.6944		745637225	122129076	506347034	4.58038e+08	28.7709		171663307	61712476	480026470	237800751	27.8252		1.19738e+09	171690892
RXN33190.1	A0A498NMG8	Potassium voltage-gated channel subfamily H member 6-like protein	28331875	90112626	1150334514	4.22926e+08	28.6558		1.36068e+11	7.58547e+10	1.1847e+11	1.10131e+11	36.6804		3238807803	1.73143e+08	9434396448	4.28212e+09	31.9957		23011858			23011858	24.4559		1414964604	30.3981			82652040		82652040	26.3005		37493866222	320039148	480432112	1.27648e+10	33.5714		1.26591e+09	147770962	7193320166	2.869e+09	31.4179		57172860	6781575952
RXN20184.1	A0A498MLE9	PDZ and LIM domain 2-like protein	570212445	29086906	1408443370	6.69248e+08	29.318														63805384	9.35755e+07	112611184	8.99974e+07	26.4234					13132146			13132146	23.6466				24867890	24867890	24.5678									24351520
RXN21519.1	A0A498MJP2	Alpha-1,4 glucan phosphorylase (EC 2.4.1.1)	208234460	19296856	267523462	1.65018e+08	27.2981		2.99112e+10	1130085744	2.37316e+10	1.82576e+10	34.0878		2145942965	612494422	1.31064e+10	5.28826e+09	32.3001											171277704	199080515	31702983	1.3402e+08	26.9979		1564597212		691541855	1.12807e+09	30.0712		6882613871	9.45785e+09	1.23964e+10	9.57894e+09	33.1572		194825598	7.48555e+07
RXN31681.1	A0A498NIK2	Cell division control 42-like protein	558687602	644627688	2115281608	1106198966	30.043		1423227729	27238062	2172903825	1207789872	30.1697				137274774	137274774	27.0325		38133992	17574344	10410177	2.20395e+07	24.3936		1043157499	29.9583		1603600814	1.9422e+09	2129096850	1.89163e+09	30.817		882258033	93584664	6.4749e+08	5.41111e+08	29.0113		162311856	44807931	233303131	1.46808e+08	27.1294		187116541	225828142
RXN10317.1	A0A498LYT4	Alpha-parvin	851574972	121939906	2817969734	1263828204	30.2352		11183643		2.12818e+07	1.62327e+07	23.9524				63345770	63345770	25.9167								203057595	27.5973		105967224	3.12404e+07	137635500	9.16144e+07	26.4491		800580234	27943197	993890152	6.07471e+08	29.1782			84657942	34945118	59801530	25.8337		27826458	168398077
RXN26550.1	A0A498M9V0	Apolipo D-like protein	255634498	420579446	561410379	412541441	28.62																																										15430849
RXN25826.1	A0A498N5K0	Alpha-amylase (EC 3.2.1.1)	152346020	166387336	213961004	1.77565e+08	27.4038			85997064	3.63141e+06	4.48142e+07	25.4175										5475890	5475890	22.3847		4.80887e+09	32.1631								26675182664	5.60743e+09	40162371610	2.41483e+10	34.4912				73651048	73651048	26.1342			4.41451e+07
RXN16421.1	A0A498M6Z5	Fibrillin-1	50366876	1.7403e+08	493936698	2.39445e+08	27.8351								50325368	17436836		33881102	25.014												78078909	2.29389e+07	5.05089e+07	25.59			6.17584e+08	593086940	6.05335e+08	29.1732			80169118		80169118	26.2565		17922968	1.88764e+09
RXN34718.1	A0A498NSH0	Serine protease HTRA1	1.10345e+08	49366150	204314794	1.21342e+08	26.8545																													13236276			13236276	23.658
RXN28235.1	A0A498MR44	Programmed cell death 6 isoform X2	762274066	195294472	903095826	6.20221e+08	29.2082		19669743	1.37532e+08	50954650	6.93856e+07	26.0481														198239620	27.5627		402160176	87951786	493215604	3.27776e+08	28.2881		431626608		237153302	334389955	28.317		11571474	104307720	61209087	59029427	25.8149		10564059	101700608
RXN10213.1	A0A498LRA4	Trypsin-2-like protein	2063844334	793862360	3892232380	2.24998e+09	31.0673			132193520	15040025	7.36168e+07	26.1335								7192210	14905296		11048753	23.3974		9678581293	33.1721								91804123603	2.60473e+10	127181972820	8.16778e+10	36.2492		68019646		134213699	1.01117e+08	26.5914		167580051	152601062
RXN21608.1	A0A498MJQ6	40S ribosomal S13	1888322902	602638632	4383145603	2.29137e+09	31.0936		7.10093e+08	446762032		5.78427e+08	29.1076				23175360	23175360	24.4661		4059858964		2.4387e+09	3.24928e+09	31.5975		2410510410	31.1667		1.87214e+09	2.11835e+09	3692011553	2.56083e+09	31.254		770554624	27847676	1002694858	6.00366e+08	29.1613		708224552	87931682	1521085927	7.72414e+08	29.5248		1054385710	5.56704e+08
RXN34685.1	A0A498NRV1	Cystatin-B-like protein	2063379551	1871254951	7407735276	3780789926	31.816		518146695	2.66571e+08	2524832090	1.10318e+09	30.039		12545810	36679488	69698408	3.96412e+07	25.2405		9.11118e+06	8.58777e+07	2.93715e+06	3.2642e+07	24.9602		2.6001e+09	31.2759		1.49846e+09	1053805751	2482730343	1.67833e+09	30.6444		113531636	21539813	445167858	1.93413e+08	27.5271		168352640	131000349	2.7034e+08	1.89898e+08	27.5006		4.89124e+07	194378960
RXN28493.1	A0A498N8F6	Voltage-dependent anion-selective channel 1	977499520	226436094	777213532	6.60383e+08	29.2987		1.30806e+10	11165166008	22217750011	1.54879e+10	33.8504		1202301518	1806697504	469578656	1.15953e+09	30.1109		930829972	6.33669e+08	1.34226e+09	9.68919e+08	29.8518		441864732	28.719		174636100	71650206	1338087996	5.28125e+08	28.9763		2328885034		879978814	1604431924	30.5794		507780460	3.52494e+08	2786765114	1.21568e+09	30.1791		1.10638e+08	4.45386e+08
RXN21747.1	A0A498MZ21	Inorganic pyrophosphatase-like protein	233917924	4.22396e+07	114315560	1.30158e+08	26.9557		197271832	299568349	1.47111e+09	6.55982e+08	29.2891		86866716	79047002		82956859	26.3059		253628120	3.17626e+08	3.72055e+08	314436516	28.2282		1.33702e+09	30.3164		1.49638e+08	435108650	58395199	2.14381e+08	27.6756		968691252		2238608833	1.60365e+09	30.5787			44355741	2.02829e+08	1.23592e+08	26.881		489407678	63836527
RXN13929.1	A0A498LZD2	Lamin-B1	134878258	421676036	490821793	3.49125e+08	28.3792		2834900942	62007794	2.74994e+09	1.88228e+09	30.8098		1.37589e+09	45079918	3615473793	1.67882e+09	30.6448			1.4507e+06	6.60018e+07	3.37263e+07	25.0074		915879805	29.7706		4.8168e+08	599081754	7.71505e+08	617422483	29.2017		5.01585e+08		7.53007e+08	6.27296e+08	29.2246		1434974909	492975631	2.29654e+09	1.40816e+09	30.3912		2.79755e+08	385356190
RXN04464.1	A0A498LD75	High mobility group B2-like protein	641201384	329775652	1000870474	6.57283e+08	29.2919		5.75382e+08	1360213737	1511206802	1.14893e+09	30.0976		830717646	1292192335	1228829454	1.11725e+09	30.0573		64824532	50828829	42603864	5.27524e+07	25.6527		1.84483e+09	30.7808		7.26056e+09	5085454402	1.33651e+10	8.57036e+09	32.9967		729125259	286787241	3514553908	1.51016e+09	30.492		9948671028	6032841671	1.77103e+10	1.12306e+10	33.3867		4.37727e+09	1.5828e+09
RXN17199.1	A0A498M8B4	Microfibrillar-associated 2	2953772330	6.33961e+06	22086455840	8.34886e+09	32.9589																							79693228	89915689	5.99624e+08	2.56411e+08	27.9339		394295556		65168050	229731803	27.7754			26081722		26081722	24.6365			2.02303e+08
RXN09413.1	A0A498LP57	Lactoylglutathione lyase	566521654	552201960	2764588194	1.29444e+09	30.2697		335637559	669428606	766655235	590573800	29.1375									33531998	7107123	2.03196e+07	24.2764		424787860	28.6622		523993138	210907904	249110794	3.28004e+08	28.2891		149314188			149314188	27.1538		84709152	169875508	113002806	1.22529e+08	26.8685		149181491	30653788
RXN05755.1	A0A498LJU3	60S ribosomal L7	691713888	204179662	1.56112e+09	8.19005e+08	29.6093		2.90205e+08	1103819016	3.95726e+09	1.78376e+09	30.7323		57782576	596581026	148631196	2.67665e+08	27.9959		6.60758e+09	6.14968e+09	6.85352e+09	6.53693e+09	32.606		498763471	28.8938		1215993130	1.58211e+09	2531309925	1.77647e+09	30.7264		2859724315	492664113	1497870255	1.61675e+09	30.5905		74818167	436026486	2981277665	1.16404e+09	30.1165		2182607579	674991762
RXN11147.1	A0A498M1A6	Peptidase S1 domain-containing protein	357837964	48806854	475539584	2.94061e+08	28.1315															7738438		7738438	22.8836		114586962	26.7719		281166916	1.86956e+08	727740103	3.98621e+08	28.5704		33557112		41754800	37655956	25.1664		397868045	2862567515	199174080	1.1532e+09	30.103		3.59441e+09	444853747
RXN13931.1	A0A498M088	Alpha-aminoadipic semialdehyde dehydrogenase	1.42165e+08	2.1832e+08	274091586	2.11526e+08	27.6563		2319453901	141181956	3480977401	1.98054e+09	30.8832		1894757500	2.00866e+08	3687482538	1.9277e+09	30.8442		1.12247e+09	9.23865e+08	1524365722	1.19023e+09	30.1486		2630503260	31.2927		325033432	360695930	117534646	2.67755e+08	27.9963		1262317400	197253285	897265578	7.85612e+08	29.5492		640736914	1155804442	942304910	9.12949e+08	29.766		3.19625e+09	2.00008e+08
RXN25850.1	A0A498MYH9	Glycerol kinase 5	130176320	143610715	382319158	2.18702e+08	27.7044		733127493	279417652	1.92892e+09	9.80488e+08	29.8689		149240074	30499394	556769661	245503043	27.8712								289520359	28.1091		86840490	129419769	7.58432e+07	9.73678e+07	26.5369								320928593	243425500	6.09881e+08	3.91412e+08	28.5441		69801956	1.33813e+08
RXN31679.1	A0A498NIR7	40S ribosomal S9	680344476	4.5231e+08	2325687924	1.15278e+09	30.1025		3.21353e+08	609171190	3.71656e+09	1549028863	30.5287			19792872	55062408	37427640	25.1576		2.29593e+09	3.08543e+09	3.26344e+09	2.8816e+09	31.4242		2128372161	30.9871		2.51622e+09	2284258091	3624146977	2.80821e+09	31.387		777873024	9180054	1099654539	628902539	29.2283		254851808	347765744	2015751165	8.7279e+08	29.7011		586736039	9.30798e+08
RXN24239.1	A0A498MRK0	Glia-derived nexin-like protein	5.37394e+08	116162648	888059793	5.13872e+08	28.9368				25209796	25209796	24.5875		140572326		230094202	185333264	27.4655		3.97371e+08	389459711	3.22706e+08	369845475	28.4623		11232418	23.4212		4.9032e+07	4.62953e+07	12454385	3.59272e+07	25.0986									96647416	3049670	49848543	25.571			474569276
RXN17619.1	A0A498M9A8	Alpha-parvin	398544740	51304908	612702439	354184029	28.3999																								24495662		24495662	24.546		201755872		1023512220	612634046	29.1905									45765828
RXN28501.1	A0A498N6P6	Janus kinase and microtubule-interacting 2-like protein	209475788	3.13452e+08	388186614	3.03705e+08	28.1781		5.77822e+10	10874411831	6.14797e+10	4.33788e+10	35.3363		6350293547	1735514253	17796093780	8.6273e+09	33.0063								609932030	29.1841		247039448	290633644	619333514	3.85669e+08	28.5228		2428349956		1.79427e+09	2.11131e+09	30.9755		1.10406e+09	4291996605	4.20367e+09	3.19991e+09	31.5754		304108392	2318696789
RXN28285.1	A0A498NE08	Rho-related GTP-binding	181643104	73449016	4.12038e+08	2.22377e+08	27.7284		497062732	710102354	771536672	6.59567e+08	29.2969								31241754		13659552	22450653	24.4203		55126277	25.7162		62788168	158047241	275907360	165580923	27.303		241381112	105329762	161978016	1.69563e+08	27.3372		172660780	95286883		1.33974e+08	26.9974		8.72763e+07	29303980
RXN18234.1	A0A498MFT5	Protein FAM180A-like	424270848	65497352	910014928	466594376	28.7976																																										11017151
RXN23432.1	A0A498MUV0	Sphingosine-1-phosphate lyase 1-like protein	43324356	61860384		52592370	25.6484								38762820			38762820	25.2082		16691794	4.79728e+06	44277355	2.19221e+07	24.3859						83383332		83383332	26.3133			47921918		47921918	25.5142			2.2691e+06		2.2691e+06	21.1137			93833600
RXN37225.1	A0A498NIE7	Elastase-1-like protein	385737467	237639765	352112576	3.25163e+08	28.2766			116857548		116857548	26.8002									6581625		6581625	22.65		4275446442	31.9934								17310135567	12634197372	20270944971	16738425970	33.9624				23230324	23230324	24.4695			50982105
RXN18447.1	A0A498MN53	F-actin-capping protein subunit alpha	1749901233	94009709	950067313	931326085	29.7947		1098748046	718277542	1783467939	1200164509	30.1606		181987436		143711966	162849701	27.279		73550204	85326633	269057167	142644668	27.0879		3.99896e+08	28.5751		69994844	878304326	236998120	3.95099e+08	28.5576		1367960264	80659128	1074582698	8.41067e+08	29.6476		135035652	126603308	713720824	325119928	28.2764		699091076	241430480
RXN06496.1	A0A498LHI8	Aspartate aminotransferase (EC 2.6.1.1)	100102448	105912970	151226464	1.19081e+08	26.8274		17861952388	7830434908	2.53808e+10	1.70244e+10	33.9869		1357077184	158810922	7221083872	2.91232e+09	31.4395		29270390	4.93823e+07	88012011	5.55549e+07	25.7274		2777214384	31.371		700288279	1367390111	3.06892e+08	7.91523e+08	29.5601		2625449551	1.07528e+08	2227140149	1.65337e+09	30.6228		1654086355	5740098365	4094599664	3.82959e+09	31.8345		5.36411e+09	1.63342e+08
RXN10996.1	A0A498LV43	Cathepsin D	335669138	21203470	116036714	1.57636e+08	27.232		1.67464e+09	1963330275	3613665723	2.41721e+09	31.1707		252935800	369287783	756718501	4.59647e+08	28.776		7.65068e+06	5961559		6.80612e+06	22.6984		1358085516	30.3389		264124422	450825452	157326064	290758646	28.1152		1437006726	182272120	830769214	8.16683e+08	29.6052		149636728	223445314	1187481121	520187721	28.9545		4.40217e+09	2.37599e+08
RXN17665.1	A0A172E1Q5	NAD(P)H dehydrogenase [quinone] 1-like protein (NAD(P)H quinone oxidoreductase 1)	370310918	93003328	379222000	2.80845e+08	28.0652		118867318	22654774	4.04014e+07	6.06412e+07	25.8538																	7.2802e+08	1096873022	535872434	7.86922e+08	29.5516		401034720	1.46415e+09	571234419	8.12139e+08	29.5972			61649261	24404158	4.30267e+07	25.3587		3.85426e+08	10265918
RXN26121.1	A0A498N016	60S ribosomal L30	924945859	353250120	4034656774	1.77095e+09	30.7219		94146666	401158166	178056224	2.24454e+08	27.7418			29686166	138903596	84294881	26.3289		4.58553e+08	5.40423e+08	177744433	3.9224e+08	28.5472		2535458926	31.2396		1978749185	657740679	1300112305	1312200723	30.2893		674335943	2.35603e+07	1001458160	5.66451e+08	29.0774		45587088	6.64936e+06	5115705	1.91174e+07	24.1884		1.13739e+09	275028788
RXN34907.1	A0A498NTU1	Peptidylprolyl isomerase (EC 5.2.1.8)	444692077	14690878	144442350	2.01275e+08	27.5846		75823495	437619720	7.59862e+08	4.24435e+08	28.661								3.78045e+08	4.5206e+08	4.33058e+08	4.21054e+08	28.6494		150842310	27.1685			36611242	28369324	32490283	24.9535								81788196	148226126	378627526	202880616	27.5961		2.63796e+07	54731246
RXN26258.1	A0A498MWH4	Fatty acid-binding heart-like protein	347224718	5917562556	1009288048	2424691774	31.1752		2.54232e+10	569161920	8.3542e+09	1.14489e+10	33.4145				107236586	107236586	26.6762		2.16566e+08	689297414		4.52932e+08	28.7547		7.04028e+09	32.713		5.25815e+08	870051951	232717141	5.42861e+08	29.016		2148569974	5.42261e+06	1.68595e+09	1.27998e+09	30.2535		2982126954	2991428204	4020015932	3.33119e+09	31.6334		848017570	159456107
RXN22475.1	A0A498N0R1	Glycerol-3-phosphate dehydrogenase [NAD(+)] (EC 1.1.1.8)	197065134	79912832	3.61461e+08	2.12813e+08	27.665		399636245		5.85293e+08	4.92465e+08	28.8754		138319863		62401900	1.00361e+08	26.5806								897293802	29.741		906952444	601116249	692208338	733425677	29.4501		2326682009	1657131078	3010119921	2.33131e+09	31.1185		40098384	15036643	135526268	63553765	25.9215		9.90943e+08	109619164
RXN03954.1	A0A498LBS5	ATP synthase subunit mitochondrial-like protein	642336156	164870700	2159751904	9.88986e+08	29.8814		2.85263e+08	8423070762	776298339	3.16154e+09	31.558		584504898	789052668	906514480	7.60024e+08	29.5015		512852737	657172839	3.03519e+08	4.91181e+08	28.8717		3014059520	31.4891		1844757824	1377243684	3330382271	2.18413e+09	31.0244		1110050784		325598952	717824868	29.4191		36837308	12185979294	106217280	4.10968e+09	31.9364		4.65046e+09	477344240
RXN20792.1	A0A498MMJ7	Calreticulin-like protein	45998628	165734933	151853072	1.21196e+08	26.8528		485578511	30521062	1.20842e+09	5.7484e+08	29.0986			4.39973e+07	646111844	3.45055e+08	28.3622		4.36978e+08	1006951984	747081808	7.30337e+08	29.444		1495829054	30.4783		367038244	1704395178	691327531	9.2092e+08	29.7785		1385223714		1351011096	1368117405	30.3495		924288779	421189158	1066183529	8.03887e+08	29.5824		7.56164e+08	922934723
RXN26996.1	A0A498N8S3	Carbonyl reductase [NADPH] 1-like protein	533343952	32702981	567205672	3.77751e+08	28.4929		1.1491e+07	82438047	53129936	4.90197e+07	25.5469														1102878702	30.0386		687746271	5.52905e+08	6.14976e+08	6.18542e+08	29.2043		6707746057	1528908622	8765703843	5.66745e+09	32.4001		187381488	42554944		114968216	26.7767		1.13754e+09	240159899
RXN02662.1	A0A498MPV8	Ubiquitin-like modifier-activating enzyme 1	106311483	71321045	159423888	1.12352e+08	26.7435		8025252138	346048294	8922815026	5.76471e+09	32.4246		456508446	174567712	2444128186	1.02507e+09	29.9331		6.50681e+08	9.95094e+07	5.52289e+08	4.3416e+08	28.6937		836556230	29.6399		762576443	1.08965e+09	1.0724e+08	6.53154e+08	29.2828		1915559938	2.37847e+08	1357036686	1.17015e+09	30.124		2241943350	5.94802e+08	2.51376e+09	1.7835e+09	30.7321		1.38941e+09	183803963
RXN34831.1	A0A498NSK2	L-lactate dehydrogenase (EC 1.1.1.27)	140889104	2811030685		1.47596e+09	30.459		1032715456	947901648	1900854597	1.29382e+09	30.269		106577004	164253414	31000976	1.0061e+08	26.5842								1724154071	30.6832									38996420		38996420	25.2168			27619264		27619264	24.7192		1.10325e+09
RXN27337.1	A0A498NDE3	Proteasome subunit alpha type (EC 3.4.25.1)	211266582	81810794	6.71066e+08	3.21381e+08	28.2597		600333830	113718804	2.31654e+09	1.0102e+09	29.912		82225931	129601510	52924729	8.82507e+07	26.3951		1.33334e+09	2.32508e+09	1.4547e+09	1.70437e+09	30.6666		686956517	29.3556		360903505	7.23367e+08	289323271	4.57865e+08	28.7703		476777422	37259856	537663467	350566915	28.3851		2271574853	367356342	2037146302	1558692499	30.5377		5.79604e+08	371124892
RXN27416.1	A0A498LN48	Vesicle-associated membrane-associated B-like isoform X1	2.09942e+08	59190542	481130532	2.50088e+08	27.8979		7.62947e+08	227032772	1.55638e+09	8.48786e+08	29.6608		53416988	53944597	105628850	7.09968e+07	26.0813		1.50114e+08	1.77024e+07	4.03058e+08	1.90291e+08	27.5036		122418893	26.8673		157840086	4.02337e+07	69720978	8.92649e+07	26.4116		37395448		35368020	36381734	25.1167		17309662	2.74023e+08	1.19205e+08	1.36846e+08	27.028		4.07896e+07	2199769
RXN36910.1	A0A498NXE4	Versican core-like protein	322465656	21995278	402098693	248853209	27.8907																							50389663			50389663	25.5866		315497964		2.05873e+08	2.60686e+08	27.9577		72286040	72681048		72483544	26.1112			302061683
RXN15781.1	A0A498M5E1	Plectin isoform X1	32089666	1.6528e+08	78344032	9.19047e+07	26.4536		92985188		1.04689e+08	9.8837e+07	26.5585		944098583	71840799	1.97904e+09	9.98326e+08	29.8949				3.43183e+07	3.43183e+07	25.0325		3.1707e+09	31.5622		2.12402e+08	664428880	554649899	4.7716e+08	28.8299		2.96083e+09	11130932	6.01539e+09	2.99579e+09	31.4803		2.99679e+08	3.65914e+09	7.81437e+08	1.58008e+09	30.5574		6.70742e+07	2.03282e+09
RXN32413.1	A0A498NKJ5	GPN-loop GTPase 3	1602953584	834603258	3682533748	2.04003e+09	30.9259		1.13253e+08	495884864	1.77499e+08	262212432	27.9662		27336396		33933624	30635010	24.8687		8514123		9.24018e+06	8.87715e+06	23.0817		253708460	27.9186		249214635	826932929	1044580982	7.0691e+08	29.397		952564190	22716478	575346420	516875696	28.9452		23671348	165801124	1.87862e+07	6.94196e+07	26.0488		410823506	257307784
RXN10339.1	A0A498LPL3	60S ribosomal L12 isoform X1	4553854042	1587961162	6656762960	4.26619e+09	31.9903		245078016	879623748	388318382	5.0434e+08	28.9098		173383600	134444212	424448120	2.44092e+08	27.8628		1697159022	1313721593	941243381	1.31737e+09	30.295		3477460898	31.6954		2.87201e+09	1483637612	2896984710	2.41754e+09	31.1709		2635456486	251040340	1189297732	1358598186	30.3395		430470588	824683102	399549189	5.51568e+08	29.039		1.30143e+09	7.79589e+08
RXN10437.1	A0A498LZ60	Niban 1	104292942	37458850	83000132	74917308	26.1588																								3.38196e+06		3.38196e+06	21.6894				17476868	17476868	24.0589									1.83158e+07
RXN05542.1	A0A498NGL8	Phosphatase 1 regulatory subunit 12B-like isoform X3	166825692	22579528	6.7407e+07	8.56041e+07	26.3512																				31573316	24.9122								7.73388e+07			7.73388e+07	26.2047
RXN11287.1	A0A498M1Q4	Nascent polypeptide-associated complex subunit muscle-specific form isoform X1 (Nascent polypeptide-associated complex subunit muscle-specific form isoform X2)	234203422	247967939	753655310	4.11942e+08	28.6179		2.26097e+08	602155995	9.08257e+08	5.78836e+08	29.1086		64261672	159291456		111776564	26.736		8.3879e+08	1491065356	1.41543e+09	1.24843e+09	30.2175		1619212404	30.5926		450804072	813094042	7.89349e+08	6.84416e+08	29.3503		999038224	41077944	527137406	522417858	28.9606		748122564	613620460	1072544636	811429220	29.5959		836721636	362678466
RXN09124.1	A0A498LQX9	Cytochrome P450 2U1	449380802	156603226	552407184	386130404	28.5245		366051301	410366528	1.87661e+09	8.84344e+08	29.72		219725602	140190004	144931704	1.68282e+08	27.3263		707198765	1.68451e+09	1473826530	1.28851e+09	30.2631		2717250824	31.3395		2.92408e+08	630038952	402999272	4.41816e+08	28.7189		971216512	2.4829e+06	2309049508	1.09425e+09	30.0273		1383017778	13224029500	2921473440	5.84284e+09	32.444		3552115638	2.0355e+08
RXN21339.1	A0A498MJ23	Smoothelin-like protein	378574512	7.1178e+06	535046500	3.06913e+08	28.1933																7595296	7595296	22.8567		152761097	27.1867								3533699344	106300332	2903996120	2181331932	31.0226									3.09503e+07
RXN27264.1	A0A498N6E6	Ubiquitin-conjugating enzyme E2 N	3340262309	524723174	2935407180	2.2668e+09	31.078		8.09786e+08	664137560	1.74595e+09	1.07329e+09	29.9994		30123412	49162932	124610268	6.79655e+07	26.0183		100680052	91446690	185949406	1.26025e+08	26.9091		2743145116	31.3532		1502964796	430136110	1.96969e+09	1.30093e+09	30.2769		1029540288		934284362	981912325	29.871		529345043	109927050	776643036	4.71972e+08	28.8141		189880856	619352428
RXN07400.1	A0A498LGV3	Septin-6 isoform X3	518433035	117902458	38015436	224783643	27.744		7.0441e+09	3926028650	1.05601e+10	7176759257	32.7407		273855441		1216203630	7.4503e+08	29.4727		7546728	6.88566e+07	21153878	3.25191e+07	24.9548		1.0319e+09	29.9427		1306487305	814596052	148416777	7.565e+08	29.4948		3110028217		8.32408e+08	1.97122e+09	30.8764		1003390760	446321764	1300192239	916634921	29.7718		1.73287e+09	1.37043e+09
RXN10964.1	A0A498LVT1	Guanine nucleotide-binding G(I) subunit alpha-1	2.8741e+08	9006769		1.48208e+08	27.1431		1434233287	6018622586	2.7908e+09	3.41455e+09	31.669		53136448			53136448	25.6632		2.47728e+07			2.47728e+07	24.5623		1228839596	30.1946		11877501	8.2665e+08	40741526	2.9309e+08	28.1268		296497482		54107532	175302507	27.3853		16541179	562631519	381736130	3.20303e+08	28.2549		31879400	4.99472e+07
RXN29154.1	A0A498NBG2	Heterogeneous nuclear ribonucleo A B-like protein	178111766	124069652	50977908	1.1772e+08	26.8108		4.98185e+08	652238970	1.5466e+09	8.99007e+08	29.7438		119623235		533625056	3.26624e+08	28.2831		2.90867e+07	1.04623e+08	7.02574e+07	67988951	26.0188		1409851721	30.3929		1.21859e+09	574012924	334346581	7.08984e+08	29.4012		184762376	12646720	150305596	1.15905e+08	26.7884		82648060	446028602	5.00649e+08	3.43108e+08	28.3541		562757498	1.76766e+08
RXN15520.1	A0A498M4S7	Alcohol dehydrogenase 1-like protein	210550874	2398001349	551806440	1.05345e+09	29.9725		7.47936e+06	1.08858e+09	18175660	3.71413e+08	28.4684								1.27519e+07	8342403	2.71114e+07	16068564	23.9377		4.53719e+09	32.0792		478453429	716284474	241265897	4.78668e+08	28.8344		2732096263	4958275881	4.45389e+09	4.04809e+09	31.9146		193480604	693171220	491915944	4.59523e+08	28.7756		2.40595e+10	2095474349
RXN13717.1	A0A498L8V5	Peroxiredoxin-4	380807016	778011072	633992952	597603680	29.1546		235916633	367447964	711177201	4.38181e+08	28.707				57215464	57215464	25.7699		2459875665	5.63015e+09	2114526893	3.40152e+09	31.6635		1604251825	30.5793		561929272	671010463	691163943	6.41368e+08	29.2566		1788477584	1285534492	1484225992	1.51941e+09	30.5009		163152184	835267496	4.72695e+08	4.90372e+08	28.8693		6.4089e+08	2.17518e+08
RXN26274.1	A0A498N3H4	60S ribosomal L11	2695894242	513375120	3661122284	2.29013e+09	31.0928		383149626	1281147100	1695580962	1.11996e+09	30.0608		67291432	93960544		80625988	26.2647		2661589382	1.87169e+09	2.55865e+09	2.36398e+09	31.1386		1932988316	30.8482		1140225692	1655639972	1033954321	1.27661e+09	30.2497		1341294720	22894942	715024811	693071491	29.3684		378889760	802936582	1237775413	8.06534e+08	29.5872		1656853214	700133460
RXN04099.1	A0A498L761	Lipocalin-like protein	448851516	375387912	1611602654	8.11947e+08	29.5968		79932181		460085405	270008793	28.0084		113725260	19123808	315217624	149355564	27.1542								24006136	24.5169			129440753		129440753	26.9477				14239412	14239412	23.7634		973438450	233174333	573535162	5.93383e+08	29.1444		24177552906	1.04431e+08
RXN34333.1	A0A498NQY9	Proteasome subunit alpha type (EC 3.4.25.1)	821354080	223637872	941942024	6.62311e+08	29.3029		152248670	529654454	3.68438e+08	3.50114e+08	28.3832		55729466	150212796	103983344	1.03309e+08	26.6224		2.32599e+08	515788717	220009782	3.22799e+08	28.2661		450254102	28.7462		854187083	1220671226	905139285	9.93333e+08	29.8877		1244478146		710811340	977644743	29.8647		165418652	650710128	4.04286e+08	4.06805e+08	28.5998		7.78959e+08	605134946
RXN16765.1	A0A498MHB2	Kinesin KIF25	574301303	140520944	968025460	5.60949e+08	29.0633		2.9543e+09	2405283615	5516949208	3.62551e+09	31.7555		174949320	93173986	480457348	2.49527e+08	27.8946		6113807	3.77013e+07	3.77158e+07	2.7177e+07	24.6959		296537323	28.1436		1.14068e+08	396103082	120745161	2.10305e+08	27.6479		77102188	7.90567e+06	96705587	6.05711e+07	25.8521		1276379154	156339402	1.54491e+09	9.92543e+08	29.8866		2.71063e+08	190490377
RXN09475.1	A0A498M799	60S ribosomal L27a	679714078	144524226	2401529112	1.07526e+09	30.002		65601840	1.68496e+08	924924606	3.86341e+08	28.5253								2509783058	1.15259e+09	2.54607e+09	2.06948e+09	30.9466		652098395	29.2805		587470264	940639969	1814932489	1114347574	30.0536		1685737274	35057816	5.75505e+08	7.65433e+08	29.5117		54363196	7978588	616973258	2.26438e+08	27.7545		1.38183e+08	236399118
RXN27689.1	A0A498N071	UMP-CMP kinase (EC 2.7.4.14) (Deoxycytidylate kinase) (CK) (dCMP kinase) (Nucleoside-diphosphate kinase) (EC 2.7.4.6) (Uridine monophosphate/cytidine monophosphate kinase) (UMP/CMP kinase) (UMP/CMPK)	865913620	616702284	4021418992	1.83468e+09	30.7729		594911277	3198908066	1.71297e+09	1.8356e+09	30.7736			38198372	275310204	156754288	27.2239			7698109		7698109	22.8761		580858258	29.1136		352711900	8.66483e+08	670144784	6.2978e+08	29.2303		932685884		797565380	865125632	29.6883		236215796	946402864	622413636	601677432	29.1644		5.02614e+08	179759544
RXN26899.1	A0A498MXZ2	Extended synaptotagmin-1-like protein	1.37311e+08	1.7662e+07	177479642	1.10818e+08	26.7236		1.14043e+07			1.14043e+07	23.4431				48723684	48723684	25.5381											165733661	2.04524e+08	3.9887e+08	256375912	27.9337		47756455		2.17373e+08	1.32565e+08	26.9821			19668804		19668804	24.2294			1.50536e+08
RXN34431.1	A0A498NRH8	Plectin-like isoform X4	8.41082e+07	56607892		7.03581e+07	26.0682		7.32787e+09	2.1628e+09	4070592611	4.52042e+09	32.0738		224709337	78730763	2.4666e+08	1.83367e+08	27.4502		27021397	2.66109e+07	70275340	4.13025e+07	25.2997		2.83433e+08	28.0784		5.10403e+08	280758869	174474540	3.21879e+08	28.2619		877577614		1.96688e+07	4.48623e+08	28.7409			3.9907e+06	1.92913e+08	9.84516e+07	26.5529		25156842	5.22523e+08
RXN26765.1	A0A498NBU2	26S protease regulatory subunit 10B	125691723		105947948	1.1582e+08	26.7873		993105722	240966508	2.38177e+09	1.20528e+09	30.1667		198429994		1008980212	603705103	29.1693		9.23152e+08	759608276	1.47819e+09	1.05365e+09	29.9728		843819205	29.6524		3.86677e+08	7.65855e+08	190531991	4.47688e+08	28.7379		357748850		168112411	2.62931e+08	27.9701		664730789	458880560	1.48594e+09	8.69851e+08	29.6962		2.61451e+08	379483170
RXN10130.1	A0A498LPN4	Metallo ase inhibitor 2-like protein	56637048	27284966	532380184	205434066	27.6141		10259837			10259837	23.2905														132813768	26.9848				89864173	89864173	26.4212								48761869		28306108	3.8534e+07	25.1996
RXN11793.1	A0A498LVZ5	A-kinase anchor 2-like isoform X2	146998984	1.42972e+07	126496230	9.59308e+07	26.5155				38812865	38812865	25.21		44429308		84546416	64487862	25.9425								36084388	25.1049															355583533	16940460	1.86262e+08	27.4728			31161634
RXN26249.1	A0A498MW15	Digestive cysteine ase 2-like protein	656882160	596265872	204171600	4.85773e+08	28.8557		183231465		8.75731e+08	5.29481e+08	28.98		163120814		1539747216	851434015	29.6653		92743450	55767544	153351891	1.00621e+08	26.5844		1229988907	30.196		348476343	661856052	133349814	381227403	28.5061		38057040		66292148	52174594	25.6368		10207457954	2244147572	5663359714	6.03832e+09	32.4915		1.25118e+09	4732798843
RXN11555.1	A0A498M1K6	Peripherin	56758208	154155529	230503004	1.47139e+08	27.1326		4.50351e+09	1.29496e+08	3.52515e+09	2.71939e+09	31.3406		315016259		505594704	4.10305e+08	28.6121								129402316	26.9473		4.22289e+08	1.33119e+09	475948057	7.43141e+08	29.4691		602372019		229937942	4.16155e+08	28.6325			91121190	213658396	152389793	27.1832			6.2517e+09
RXN08246.1	A0A498LMD6	Glutathione peroxidase	1394197660	104984311	814361584	771181185	29.5225																							47094616		130412497	8.87536e+07	26.4033
RXN15179.1	A0A498M2U1	Leucine-rich alpha-2-glyco-like protein	276794413	1.14451e+08	92149072	1.61131e+08	27.2637		5805115	4.16395e+07	1.26951e+08	58131933	25.7928		56348390		218662360	137505375	27.0349								707835240	29.3988			290311023		290311023	28.113				52363866	52363866	25.6421		4722606164	864514840	4945731610	3.51095e+09	31.7092		173612108	3.33513e+09
RXN21785.1	A0A498MZB0	Pentaxin (Pentraxin)	295513344	615013801	1897583764	9.36037e+08	29.802		243920163		28980058	1.3645e+08	27.0238		351543676	328136764	345699372	3.41793e+08	28.3485											1.22795e+09	609940007	860643484	8.99512e+08	29.7446		1290446312	1718368091	1069612944	1.35948e+09	30.3404								9.41201e+07	873102746
RXN31815.1	A0A498NJ12	60S ribosomal protein L13	531663696	51262640	1101976936	561634424	29.0651		1.87299e+09	901904863	4.18212e+09	2.319e+09	31.1109			28685100	35573088	32129094	24.9374		8971841858	5.94288e+09	7.08022e+09	7.33165e+09	32.7715		454416704	28.7594		1631337030	1923345820	1012607768	1522430206	30.5037		800481556		1.2732e+09	1.03684e+09	29.9495		978160194	757824928	2.44622e+09	1.39407e+09	30.3767		1.78984e+09	738357173
RXN10206.1	A0A498LSX2	ADP-ribosylation factor 4	656309584	9.98511e+08	320866421	6.58562e+08	29.2947		1.7912e+08	422339760	1.82544e+08	2.61335e+08	27.9613									3.8797e+06		3.8797e+06	21.8875		189001492	27.4938		372527260	182178169	146620152	2.33775e+08	27.8005		654101216	189236470	251544728	3.64961e+08	28.4432		132624940	7.24498e+06	1832792224	6.57554e+08	29.2925			100096650
RXN37196.1	A0A498NZS0	Cysteine and glycine-rich 2	219814179	425500676	77233382	2.40849e+08	27.8436				43475304	43475304	25.3737								3346109	3.23145e+06		3.28878e+06	21.6491													8.22037e+06	8.22037e+06	22.9708									48969519
RXN36218.1	A0A498NWT4	Histone H3	1051372672	402170768	5990740200	2481427880	31.2085		1256291912	202735478	9.79937e+09	3.7528e+09	31.8053		427296859	423213200	487043168	4.45851e+08	28.732		2.30463e+08	109739096	36835465	1.25679e+08	26.9052		4592668132	32.0967		3295762248	4273542376	8159936864	5243080496	32.2878		6153090016	250635618	2705570130	3.03643e+09	31.4997		9981664668	313265472	35112029198	1.51357e+10	33.8172		608494940	7680563988
RXN02646.1	A0A498MSK2	60S ribosomal L22-like protein	1005064128	119968401	374337394	4.9979e+08	28.8967		266755270		6.32257e+08	4.49506e+08	28.7438				176462428	176462428	27.3948		37404170	4284765	33090177	2.49264e+07	24.5712		5.76442e+08	29.1026		795272173	160895979	821269211	592479121	29.1422		1754461312	28060730	164566689	649029577	29.2737				86743600	86743600	26.3703		5.59526e+07	3.32889e+08
RXN03662.1	A0A498L5N4	ABHD14B	297678131	2.04157e+08	1494890230	6.65575e+08	29.31		3.13639e+08	6.97193e+08	6.38363e+08	5.49731e+08	29.0342								3.19524e+06		3.4268e+06	3.31102e+06	21.6588		922544992	29.781		167826030	55608534	8.34677e+07	1.02301e+08	26.6082		940019009	114606731	1229226122	761283954	29.5039		120030484	22739786	335773272	159514514	27.2491		4.74321e+08	101833092
RXN34327.1	A0A498NS09	Glutathione peroxidase	1010545040	1163732948	2286783420	1.48702e+09	30.4698		225619398	1.3826e+09	1.04591e+09	8.84708e+08	29.7206			7.70317e+07		7.70317e+07	26.1989								1616981464	30.5907		1634108746	1406247368	1015992034	1.35212e+09	30.3326		2878863152	1942246838	5997237164	3606115718	31.7478		6339602303	2219736376	5944793136	4834710605	32.1708		3125237052	138781670
RXN26640.1	A0A498N0Q6	Rho GDP-dissociation inhibitor 2-like isoform X2	349345778	8.01184e+06	913649358	4.23669e+08	28.6584		822893072	4.54331e+08	1328763763	8.68663e+08	29.6942		33545851			33545851	24.9996			4.52991e+07		4.52991e+07	25.433		730195675	29.4437		2145561884	2580701140	1.71242e+09	2.14623e+09	30.9992		253946327		488847369	371396848	28.4684		1288148946	45298552	1775665180	1.03637e+09	29.9489		1.00467e+09	1379396136
RXN05711.1	A0A498LBM3	40S ribosomal protein S8	316005795	172483332	2680688490	1056392539	29.9765		78815316	4.87848e+08	479114959	3.48593e+08	28.377								8.84555e+09	6.21576e+09	6.27259e+09	7.1113e+09	32.7275		576126966	29.1018		1600996478	2403959784	3108169934	2.37104e+09	31.1429		3.04383e+09	316649910	3002392773	2.12096e+09	30.9821		422101142	126569056	2524744449	1024471549	29.9322		1148842299	652540395
RXN20795.1	A0A498MW06	Fibrillin-2-like protein	5.85105e+07	27885418	5.00833e+08	195743133	27.5444																													153407860			153407860	27.1928
RXN17472.1	A0A498MDL6	40S ribosomal S17	7.98335e+08	4.80862e+08	2209143218	1.16278e+09	30.1149		96485377		273316844	1.84901e+08	27.4622				374098719	374098719	28.4788		11233817	78630866	3.52609e+07	4.17085e+07	25.3138		801538288	29.5782		2408216157	6.98179e+08	806689282	1.30436e+09	30.2807		823660808		494065936	658863372	29.2954		186219984	149095798	331489664	222268482	27.7277		248380656	253170036
RXN26498.1	A0A498MX46	Transcription elongation factor B polypeptide 3-like protein	325424039	117576064	867684608	4.36895e+08	28.7027		21637397	1348230784	893992809	754620330	29.4912		257940920	85246416		171593668	27.3544			79575398	18677348	49126373	25.55		294359284	28.133		472543888	48281056	208707008	2.43177e+08	27.8574		93752620		93499896	93626258	26.4804				127645728	127645728	26.9276		2.0231e+08
RXN19138.1	A0A498MD85	Hepatocyte growth factor receptor-like protein	1513882386	16132489	1423909708	9.84642e+08	29.875														64445528	21908772	3.21446e+07	3.94996e+07	25.2353		25218893	24.588		55516624		218455264	136985944	27.0295		2653208137	65041176	509490998	1075913437	30.0029		189008910	782137641		4.85573e+08	28.8551			46617128
RXN31167.1	A0A498NHG3	Dolichyl-diphosphooligosaccharide--protein glycosyltransferase subunit 1	169337912	4.10891e+08	1089447557	5.56559e+08	29.052		1.1336e+09	105483075	1.31642e+09	8.51834e+08	29.666		141790254	32835014	2416723772	8.63783e+08	29.6861		2034730384	4.32684e+08	3.67511e+09	2.04751e+09	30.9312		2553907984	31.2501		8.9479e+08	1252862422	1249925748	1.13253e+09	30.0769		1203970359	488258578	2233876692	1.3087e+09	30.2855		171931246	222742636	543732173	3.12802e+08	28.2207		1.28271e+09	7.29701e+08
RXN20411.1	A0A498MH16	Ras-related Rab-11B	1438274508	1047904713	5267236860	2584472027	31.2672		363959444	2211215811		1.28759e+09	30.262		24705846	130308804		77507325	26.2078		319802427	266984003	4.15984e+08	3.34257e+08	28.3164		2740900324	31.352		1.81383e+09	1283280724	2425304695	1.8408e+09	30.7777		2472788722	1038982686	1584387517	1.69872e+09	30.6618		3267659092		2149863197	2.70876e+09	31.335		1.33327e+09	1547195985
RXN17002.1	A0A498MC44	NEDD8-conjugating enzyme Ubc12	591838564	142176332	1439482430	7.24499e+08	29.4324		1.5744e+08	44161188	966094918	3.89232e+08	28.5361								61329255	36969901	1.50247e+07	3.77746e+07	25.1709					151334837	68155752	178609183	132699924	26.9836		118784828		57381701	8.80833e+07	26.3924				49629824	49629824	25.5647			33945984
RXN22230.1	A0A498MPH1	WD repeat-containing 1	552936540	2.34788e+08	1033284569	6.07003e+08	29.1771		1355305972		1367702192	1361504082	30.3426		173131552	120557016	1223392908	5.05694e+08	28.9137		177303054	43077929	424366586	2.14916e+08	27.6792		743190674	29.4692		9.39386e+08	8.74114e+08	1504560850	1.10602e+09	30.0427		1332628696		1004606943	1.16862e+09	30.1222		766815772	262559198	388210666	4.72529e+08	28.8158		849690611	5.28457e+08
RXN11852.1	A0A498LWD0	Galectin	724646732	9.54988e+08	940195828	8.73277e+08	29.7019								41466080	62203796	157467974	87045950	26.3753																														6.07648e+08
RXN05689.1	A0A498LBK3	Major facilitator superfamily domain-containing 8 isoform X1	123726912	113299675	133476681	1.23501e+08	26.8799		1.47244e+08	86921728	88113001	1.07426e+08	26.6788		85860328		361685957	2.23773e+08	27.7375								26821508	24.6769		484398582	1882875486	546688684	9.71321e+08	29.8554				34282320	34282320	25.031		136881836	61960780	389270504	1.96038e+08	27.5466			752699979
RXN22011.1	A0A498MM09	Septin-7-like isoform X1	144187024	80965110	215573530	1.46909e+08	27.1303		5.04125e+09	1153248544	8.17725e+09	4.79058e+09	32.1576		106570447		207706078	1.57138e+08	27.2275								22724224	24.4377			122785781	23160555	72973168	26.1209		613151432		162297267	3.87724e+08	28.5305		164751840	75790736	114128597	1.18224e+08	26.8169		56852384	207520865
RXN22786.1	A0A498MX37	Cold-inducible RNA-binding-like protein	933939060	425856298	346431989	568742449	29.0832		146210282	150647216	309912382	2.02257e+08	27.5916		339897504		185590880	262744192	27.9691		166012915	104847397	5.64188e+07	1.09093e+08	26.701		446910298	28.7354		449967194	511449772	369169576	4.43529e+08	28.7245		234094112		2.05935e+07	1.27344e+08	26.9242			226330782		226330782	27.7539		100174900	265608380
RXN26955.1	A0A498NC59	Ankycorbin-like protein	62009361	19811794	63403412	48408189	25.5287																				8.13926e+06	22.9565
RXN28083.1	A0A498N790	Aspartate--tRNA cytoplasmic	59981054	133418768	239027270	144142364	27.1029		1671797246	36979206	1.5072e+09	1.07199e+09	29.9976		147039212		688011286	417525249	28.6373		1007296696	1.49137e+08	1344935246	8.33789e+08	29.6351		1.38346e+09	30.3656		494851436	235753839	492400956	4.07669e+08	28.6028		479626494	218825576	406762393	368404821	28.4567		333996114	326761119	339059212	3.33272e+08	28.3121		6.21151e+08	3.8896e+08
RXN02400.1	A0A498L1T3	Laminin subunit alpha-5	171813114	14263584	1054596484	4.13558e+08	28.6235		2.52864e+08	357633280	607043568	4.05847e+08	28.5964		208744248			208744248	27.6372		6159326	5.16147e+06		5.6604e+06	22.4325		61484066	25.8737		266983962	8.19686e+06	1.561e+08	143760171	27.0991		164502784	15235418	71543930	8.37607e+07	26.3198			1.05387e+08		1.05387e+08	26.6511		1.76562e+08	14131664
RXN08936.1	A0A498LPC8	Voltage-dependent anion-selective channel 2	94886484	61725280	229632656	128748140	26.94		13246261125	11041711728	2.27793e+10	1.56891e+10	33.869		233857048	492685734	27691966	2.51412e+08	27.9055		6.90119e+08	3.76174e+08	1604702674	8.90332e+08	29.7298		2514787376	31.2278		281959836	420618648	624444716	4.42341e+08	28.7206		303855832		306624896	305240364	28.1854		613126305	6853909155	1245356426	2.90413e+09	31.4355		1.30133e+09	66607679
RXN34317.1	A0A498NS01	Guanine nucleotide-binding G(I) subunit alpha-2-like protein	124354522	287710496	921385400	4.44483e+08	28.7276		11009445352	857434452	2.3558e+10	1.18083e+10	33.4591		85069550		32990330	59029940	25.8149		7.04523e+06		159267410	8.31563e+07	26.3093		121689058	26.8586		1241568801	3.87906e+08	1.3118e+09	980426140	29.8688		3653542308	353945464	1614209942	1873899238	30.8034		973606687	15500009	3162805279	1.38397e+09	30.3662		1.52634e+09	827362191
RXN33403.1	A0A498NNB9	3-hydroxyisobutyrate dehydrogenase (HIBADH) (EC 1.1.1.31)	66510026	15033874	320584196	1.34043e+08	26.9981		92432482	551199492	390295475	344642483	28.3605		174163414	122153241	67723360	1.21347e+08	26.8546			9292259	8.72584e+07	4.82753e+07	25.5248		109140255	26.7016		67086377	2.33517e+08	272424705	1.91009e+08	27.5091		162382928		190350440	176366684	27.394		43630132	4177844584	100714890	1.44073e+09	30.4242		352559619	12432543
RXN05296.1	A0A498LE97	Chondroitin sulfate proteoglycan 4	3.89606e+07	7.69052e+07	307475502	1.41114e+08	27.0723																							30817266	4887023		1.78521e+07	24.0896															26646016
RXN05028.1	A0A498LA25	Glia maturation factor	1835024421	311743260	2423957520	1523575067	30.5048		371107887	1481652843	1881141811	1.24463e+09	30.2131			19004212	69878822	44441517	25.4054		15187067	3.544e+07	1.16527e+07	2.07599e+07	24.3073		113615160	26.7596		322541764	246681729	280390938	2.83205e+08	28.0773				80146881	80146881	26.2561		67431570	33072552	220788952	1.07098e+08	26.6744		118147520	173546042
RXN08708.1	A0A498LK20	Niban-like protein	81719356	8.71022e+07	216330225	1.28384e+08	26.9359		29124529			29124529	24.7957		152903557		345110080	2.49007e+08	27.8916								44167326	25.3965		196032802	9.46005e+07	65506483	1.18713e+08	26.8229				114591560	114591560	26.7719								21300436	179854335
RXN27952.1	A0A498N8C4	Copine-3 isoform X1	329472452	2.57553e+08	790998611	4.59341e+08	28.775		358234430		286457181	3.22346e+08	28.264		294473948		1370090172	832282060	29.6325		39326288	38267748		38797018	25.2094		737174250	29.4574		688107062	801861572	482569427	657512687	29.2924		629430860	216767962	1.83338e+09	8.93194e+08	29.7344		634346774	6.6439e+07	1.19325e+09	6.31345e+08	29.2339		827440958	1017097815
RXN34832.1	A0A498NRX4	Phosphate carrier mitochondrial isoform X1	98238150	14184006	6.25496e+07	5.83239e+07	25.7976		4.3992e+09	1323860167	4540032023	3.42103e+09	31.6718		271042448	246725368	275620382	2.64463e+08	27.9785		2053650907	1.97445e+08	3.25936e+09	1.83682e+09	30.7746		667075368	29.3133		641471687	427002159	1347510924	8.05328e+08	29.585		2643107795	2.57427e+09	1589207436	2.26886e+09	31.0793		2546843460	3264421120	2447190962	2752818514	31.3583		5.54393e+09	342082346
RXN05667.1	A0A498LJ30	Flotillin-1-like protein	168629501	2.3981e+08	425907675	2.78116e+08	28.0511		4.31658e+08	489602766	560119036	4.93793e+08	28.8793		367482510		1341164809	8.54324e+08	29.6702				34438217	34438217	25.0375		1149660422	30.0986		1566071385	1.93012e+09	1764485689	1.75356e+09	30.7076		772047587	168289830	750907112	5.63748e+08	29.0705		334730344	790281780	377102633	500704919	28.8994		1.02871e+09	4.45042e+08
RXN06894.1	A0A498LJQ6	Clathrin heavy chain	121440390	111176439	378175037	2.03597e+08	27.6011		4.571e+09	452540169	3.92024e+09	2.98126e+09	31.4733		77927688		330250627	2.04089e+08	27.6046		3.85531e+08	9.58814e+07	1428434483	6.36616e+08	29.2458		1645813159	30.6162		3.27855e+09	1928785098	2219491817	2.47561e+09	31.2051		7.25956e+09	1.52188e+09	3959748632	4.24706e+09	31.9838		1763594956	2.38512e+08	5.64337e+09	2.54849e+09	31.247		7.65732e+09	2400289817
RXN12832.1	A0A498LZM8	Potassium voltage-gated channel subfamily H member 4-like protein	379555460	389819961	209404896	3.2626e+08	28.2814		996073473		2328299176	1.66219e+09	30.6304		99990434	71541680	276518980	1.4935e+08	27.1541		186546062	8.43127e+07	163776171	1.44878e+08	27.1103		1.13679e+09	30.0823		445465468	8.63797e+08	1.05703e+09	7.88764e+08	29.555		7.19013e+08	569044912	3.12647e+08	5.33568e+08	28.9911		219313608		1131398577	6.75356e+08	29.3311		765862410	8.79857e+08
RXN19807.1	A0A498MG59	40S ribosomal S2	1656617534	380772905	1947699235	1.32836e+09	30.307		1.06559e+09	454043716	2503903262	1.34118e+09	30.3209		158968880	312639880	82213280	1.84607e+08	27.4599		5491847744	2798789316	8850730173	5.71379e+09	32.4118		1379527354	30.3615		2578352935	1697643889	3.01138e+09	2.42913e+09	31.1778		1624492794	247285856	1713577650	1.19512e+09	30.1545		969571940	543112900	2402456760	1305047200	30.2815		1.87645e+09	676882133
RXN31686.1	A0A498NIQ5	Mucin-2-like isoform X2	874646176	44856512	1069279408	6.62927e+08	29.3043														1.40844e+07	3.60435e+07		2.50639e+07	24.5791		145597088	27.1174				8735701	8735701	23.0585		27609168			27609168	24.7186		720389628		7.17193e+08	7.18791e+08	29.421		196022202	1.57045e+09
RXN08847.1	A0A498LTU4	Fatty acid-binding brain-like protein	90842848	1438807612	130315908	5.53322e+08	29.0435		5.40241e+10	3.25071e+10	169967361104	8.54995e+10	36.3152		88899440	186013696	504877518	259930218	27.9535			2.45748e+06		2.45748e+06	21.2287		1853550874	30.7876		163272224	131366944	6487814	1.00376e+08	26.5808		124345008	298643161	25001212	1.4933e+08	27.1539		1241907531	23230075	3438697343	1567944983	30.5462		3.21442e+08	564308818
RXN05027.1	A0A498LH57	Galectin	276406333	42793088	7.64006e+08	3.61068e+08	28.4277		558625305	513491024	1900820927	9.90979e+08	29.8843		66676514	56267415	40091720	5.43452e+07	25.6956			208892522	9.31967e+06	1.09106e+08	26.7012		83058591	26.3076		23888100	7.12635e+07	89897524	6.1683e+07	25.8784		475263528	31843722	976982583	494696611	28.882		288609384	2.95425e+08	962744576	5.15593e+08	28.9417		3.24844e+07	1.11922e+08
RXN18532.1	A0A498MGP0	Sialic acid synthase	123127690	44641932	198183456	1.21984e+08	26.8621		4.18854e+08	269505941	1.26605e+09	6.51471e+08	29.2791		199622438		152740218	176181328	27.3925		5.53855e+07	2.1974e+08	195800981	1.56976e+08	27.226		3745391534	31.8025		7.36842e+08	1258344469	193165849	7.29451e+08	29.4422		3378301765	54967480	4151718215	2.52833e+09	31.2355		383089482	132883020	1014132700	5.10035e+08	28.926		896913460	154890176
RXN36408.1	A0A498NCC9	60S ribosomal L23a	1138073228	1443089700	9668285936	4.08315e+09	31.927		4.71975e+08	1.0492e+09	2383892184	1301687557	30.2777			17002966		17002966	24.0193		5.41625e+09	4.19315e+09	3.91154e+09	4.50698e+09	32.0695		630812688	29.2326		603494850	1.06756e+09	2377179078	1.34941e+09	30.3297		3186714860	24838924	2.11601e+09	1.77585e+09	30.7259		1170084759	405945802	1481724218	1019251593	29.9249		1228408516	1028898510
RXN07401.1	A0A498LGY1	PCTP protein	94056376	332787148	56793648	1.61212e+08	27.2644		2.22687e+09	2209159705	4.05279e+09	2.82961e+09	31.398								8.58341e+07	25871143	99136031	7.02804e+07	26.0666		32031948	24.933			27752067	115372088	7.15621e+07	26.0927			29290422		29290422	24.8039			97444224	168854976	133149600	26.9885		1.87379e+08	267639322
RXN05914.1	A0A498LGU7	Neurocalcin-delta	323976052	136809786	632608220	364464686	28.4412		21764362	156494914		89129638	26.4094														21061270	24.3281		14801014		8.6199e+07	5.05e+07	25.5898		58743778		43739098	51241438	25.6108									39418763
RXN27418.1	A0A498MZQ6	Putative aminopeptidase NPEPL1	73211609	58647453	7.50993e+07	6.89861e+07	26.0398		8.49421e+08	245614799	1.14892e+09	7.47985e+08	29.4784		206505786		377564948	292035367	28.1216		4.05574e+07	8.3169e+07	5.32106e+07	5.8979e+07	25.8137		383308142	28.5139		2.33805e+08	587502790	1.23849e+08	3.15052e+08	28.231		6.02351e+08	1105890058	9.76775e+08	8.95005e+08	29.7373		437321783	274505412	5.29612e+08	4.13813e+08	28.6244		614200801	181470505
RXN09130.1	A0A498LLM0	Aminoacyl tRNA synthase complex-interacting multifunctional 1	99605064	1.7407e+07	8.54388e+07	6.74836e+07	26.008		3.95274e+08	358733301	7.90124e+08	5.1471e+08	28.9392		7.07766e+06		181647904	9.43628e+07	26.4917		846436473	9.87216e+08	1.23407e+09	1.02258e+09	29.9296		306679862	28.1922		171125637	243638885	56189478	1.56985e+08	27.226		40681183	77225644	118737717	7.88815e+07	26.2332		54922556	53935644	256954546	121937582	26.8616		138849773	98927980
RXN32832.1	A0A498NMR0	Hsc70-interacting	33600667	81763587	15610059	4.36581e+07	25.3797		421628410	208189886	596297127	408705141	28.6065		436829672	9564620	885810804	4.44068e+08	28.7262		1.77505e+08	3.32535e+08	264478820	2.58173e+08	27.9438		648181123	29.2718		250803243	113685475	26320462	1.3027e+08	26.9569		1.14788e+08		15466709	6.51273e+07	25.9568		277331592	457639040	2.71115e+08	3.35362e+08	28.3211		4.38658e+08	222110494
RXN16925.1	A0A498MHT8	26S proteasome non-ATPase regulatory subunit 2	4.38517e+07	22776650	12829305	2.64859e+07	24.6587		7.06326e+08	4.65511e+07	8.11414e+08	5.2143e+08	28.9579		9.86675e+07	37161353	1345004352	4.93611e+08	28.8788		2.34717e+08	46760704	2.99696e+08	1.93725e+08	27.5294		171440527	27.3531		2.86579e+08	1.85181e+08	1.85169e+08	2.18976e+08	27.7062		782325615	407834325	607649618	5.9927e+08	29.1586		737020772	126438463	4.6565e+08	4.43036e+08	28.7229		221879280	141541037
RXN17300.1	A0A498MAL1	Rho GTPase-activating 1-like isoform X3	6.84999e+07	312655649	331195740	2.3745e+08	27.8231		2475393416	346560800	4164191927	2328715381	31.1169		688982103	248874724	2030411600	989422809	29.882		60674176	9198599	9.22226e+07	5.40318e+07	25.6873		8.24046e+08	29.6181		356780700	5.57117e+08	465225063	4.59707e+08	28.7761		94709174			94709174	26.497		15385649403	1664365740	27573312138	14874442427	33.7921		454825694	4585364184
RXN24495.1	A0A498N6F7	Beta-centractin	334468432	52577968	424046548	270364316	28.0103		2.34358e+09	1543351714	4309456518	2.73213e+09	31.3474		146420264	40976236	940954492	3.76117e+08	28.4866		283628021	64410033	432005526	2.60015e+08	27.954		143683508	27.0983		17985502	417741505	31747778	1.55825e+08	27.2154		566142140		167554442	366848291	28.4506		213929868	280462396	454805471	316399245	28.2372		353371404	189664964
RXN04270.1	A0A498LI09	ATP synthase subunit gamma	305145708	57888573	618626908	3.2722e+08	28.2857		4018059605	2092690178	9.07387e+09	5.06154e+09	32.2369		5.5866e+08	8.67555e+08	239324410	5.5518e+08	29.0484		5.70886e+09	2.14052e+09	7.20945e+09	5.01961e+09	32.2249		717593631	29.4186		6.39169e+08	1022817547	1685637100	1.11587e+09	30.0555		1538599622		2260233199	1.89942e+09	30.8229		1231684424	6479590020	3.80507e+09	3.83878e+09	31.838		3.79945e+09	5.1153e+08
RXN05209.1	A0A498LAF5	Unconventional myosin-Ic isoform X1	96290068	26590441	115600536	7.94937e+07	26.2443		57945156612	11425595639	94165092870	5.45119e+10	35.6659				29337290	29337290	24.8062								10622568	23.3406			20535925		20535925	24.2916		5.91913e+08		376456052	4.84185e+08	28.851		41628404	105496400	3025391351	1057505385	29.978			3.32307e+07
RXN17805.1	A0A498MKL8	Uncharacterized protein	83836036	39351818	9.55621e+07	7.29167e+07	26.1197		5.52561e+08	37224550	990110354	5.26632e+08	28.9722		343222111	34832682	1203045568	5.27033e+08	28.9733		7.90292e+08	1.17471e+08	6.53334e+08	5.20365e+08	28.9549		602758275	29.167		713641401	407887729	3.24283e+08	4.81937e+08	28.8443		922856182	343043806	1053502274	7.73134e+08	29.5261		201406992	63938073	1078773777	448039614	28.7391		5.95227e+08	3.69994e+08
RXN05295.1	A0A498LII5	Proteasome endopeptidase complex (EC 3.4.25.1)	755389756	104442693	474658496	444830315	28.7287		721832583	709496656	1683588253	1.03831e+09	29.9516		271572724	210627472	34006336	172068844	27.3584		5.18359e+08	9.02247e+08	8.27688e+08	7.49431e+08	29.4812		841664706	29.6487		622162659	709159349	6.55307e+08	6.6221e+08	29.3027		1152315926	82126444	801076812	678506394	29.3378		865777421	516821163	1663171169	1.01526e+09	29.9192		546288405	218266808
RXN32227.1	A0A498NKW3	Eukaryotic translation initiation factor 2 subunit 1	503664736	40357538	74314568	2.06112e+08	27.6189		214953070		5.90073e+08	4.02513e+08	28.5845								182665066	75282765	2.05146e+08	1.54365e+08	27.2018		303055788	28.175		14958470	180446514	4.37324e+07	7.97125e+07	26.2483		198505154			198505154	27.5646		214087264	61865293	1422976710	5.6631e+08	29.077		47295508	181240637
RXN31507.1	A0A498NIJ4	COP9 signalosome complex subunit 1	50232036	46991922	183427470	93550476	26.4792		2694242253	254918508	4.94178e+09	2.63031e+09	31.2926		46881874		113191800	80036837	26.2542		6.53687e+06	3055499	2.71202e+07	1.22375e+07	23.5448		3.19151e+08	28.2497		150070884	121199129		1.35635e+08	27.0152		330178628			330178628	28.2987		424617947		6.82926e+08	5.53772e+08	29.0447		149223936	1.10157e+08
RXN32467.1	A0A498NLK0	Tenascin-like isoform X1	54455600	4.13356e+08	322396123	2.63403e+08	27.9727		2.12927e+09	16404403	1.57034e+09	1.23867e+09	30.2061		93289700		39571636	66430668	25.9853											5.85945e+07	3115052		3.08548e+07	24.879										2.39707e+07	2.39707e+07	24.5148			3.58105e+08
RXN21754.1	A0A498MQZ9	Paladin-like isoform X2	406083724	217670157	1828319496	8.17358e+08	29.6064		338718567	101971616	972802307	4.71164e+08	28.8117								816487553	1123051346	4.4348e+08	7.9434e+08	29.5652		295724560	28.1397		1.20829e+08	533005343	2.44089e+08	299308025	28.1571		947890272		629956016	788923144	29.5553			36767137	471674912	2.54221e+08	27.9215		541794692	217253899
RXN13544.1	A0A498M340	Guanine nucleotide-binding G(I) G(S) G(T) subunit beta-1	1651856490	303404745	793921968	916394401	29.7714		19672370258	7007011127	3.48021e+10	2.04938e+10	34.2545		4500571778	1.24234e+10	3437676448	6.78722e+09	32.6602		1.52085e+08	53304239	192123888	1.32504e+08	26.9815		953557730	29.8287		747292692	950379153	2.64084e+09	1.44617e+09	30.4296		4733333108	119287364	2679967004	2510862492	31.2255		1213003628	26346904	2.70958e+09	1.31631e+09	30.2939		1490504367	2005220561
RXN32382.1	A0A498NKC4	Biotinidase isoform X2	276698404	647736539	530122092	484852345	28.853		7.1275e+08		1008909532	8.6083e+08	29.6812		1252096457	370614840	3474194962	1698968753	30.662			8.91636e+06	22132703	1.55245e+07	23.888		1362534896	30.3436		87613027	715008124		4.01311e+08	28.5801		142975756	138568797	1.67421e+08	1.49655e+08	27.1571		10067939466	2244887444	1.07368e+10	7.68321e+09	32.8391		1.61295e+09	4.08012e+09
RXN12865.1	A0A498M5D4	40S ribosomal S15a	861891822	1871920698	3735226928	2.15635e+09	31.0059		166655226	59328258	9.99138e+08	4.08374e+08	28.6053			37525860	132067432	84796646	26.3375		1.75933e+09	1.09986e+09	1.3566e+09	1.40527e+09	30.3882		5949187881	32.47		1.12264e+09	1546821824	1.57283e+09	1.4141e+09	30.3972		2920154108	4.02136e+09	1815333871	2.91895e+09	31.4428		269818712	231084854	5.09933e+08	3.36946e+08	28.3279		1.57041e+09	859966194
RXN32654.1	A0A498NLT2	Aminopeptidase	46467410	73854510	41783868	5.40353e+07	25.6874		4.612e+08	38294556	1.14201e+09	5.47167e+08	29.0274		156962385		183893550	1.70428e+08	27.3446		61257692	2.60882e+08	123684525	1.48608e+08	27.1469		2.25344e+08	27.7476		8509416	124654410	3.33423e+06	4.54994e+07	25.4393		544802542	2370772331	1022345851	1.31264e+09	30.2898		463306603	100876539	7.00629e+08	4.21604e+08	28.6513		3.46831e+09	5.5762e+08
RXN05188.1	A0A498LAI7	Polyadenylate-binding protein (PABP)	20613983	1.26344e+08	226427150	1.24462e+08	26.8911		1356294809	423929254	1.37659e+09	1.05227e+09	29.9709		277578802		1476347850	876963326	29.7079		1.15964e+10	329255620	2.94549e+08	4.07339e+09	31.9236		2.2192e+09	31.0474		1416636175	1287098083	968693254	1224142504	30.1891		971297090		305807378	638552234	29.2502		990770564	57203235	9.47092e+08	6.65022e+08	29.3088		1.396e+09	7.99907e+08
RXN16028.1	A0A498M566	ADP-ribosylarginine hydrolase-like protein	323346186	94668135	728989536	382334619	28.5103		3.83515e+08	9603246	487902809	2.93674e+08	28.1296				58512828	58512828	25.8022				4.95485e+06	4.95485e+06	22.2404		210365168	27.6483		41705340	132014976		86860158	26.3722		129032864		131501012	130266938	26.9569		96536148	188305787	304152278	1.96331e+08	27.5487		76482940	20750262
RXN34193.1	A0A498NQL0	Heterogeneous nuclear ribonucleo A B-like isoform X2		50270574	165298208	107784391	26.6836		76843466	779293120	4394457408	1750197998	30.7049		37956540	145839988		91898264	26.4535		57367610	2.3088e+08	564344565	2.84198e+08	28.0823		99322728	26.5656		393751272	828728433	737837572	6.53439e+08	29.2835								1056628964	324263112	1.77556e+09	1.05215e+09	29.9707		1911125389	75020328
RXN15961.1	A0A498LDZ5	GTP-binding SAR1b	299045096	329196208	584061080	4.04101e+08	28.5901		296387330		586463143	4.41425e+08	28.7176								1.51364e+08	1.11295e+08	150266348	1.37642e+08	27.0363		358914880	28.4191		244421154	396195997	531805431	3.90808e+08	28.5419		113894238	192835524	8.90508e+07	1.31927e+08	26.9752		461738402		302629465	3.82184e+08	28.5097		2.10841e+08	2.57455e+08
RXN12910.1	A0A498LJR2	Calpastatin-like isoform X9	64051242	83734913	76614654	7.48003e+07	26.1565		2.29879e+07		7.27187e+06	15129896	23.8509		46453407		473770624	2.60112e+08	27.9546		17166498	4.41687e+06		1.07917e+07	23.3634		616881728	29.2004		159586413	282071380	106504124	182720639	27.4451			56076752	15702845	3.58898e+07	25.0971			153152020	37235656	95193838	26.5044		14079206	64014447
RXN28406.1	A0A498NBX9	40S ribosomal S6	224874494	8.22418e+07	873021930	3.93379e+08	28.5513		1.30321e+08	728308740	1.40502e+09	7.54551e+08	29.491			42875888		42875888	25.3537		3534772854	1.85126e+09	6285067002	3.89037e+09	31.8573		114128142	26.7661		404597572	867978705	960764205	7.44447e+08	29.4716		1048859866		547257224	798058545	29.5719		121695369	247240578	2209434984	859456977	29.6789		917959336	2.13659e+08
RXN27466.1	A0A498N9T1	Leukotriene A(4) hydrolase (LTA-4 hydrolase) (EC 3.3.2.6)	49419478	15965022	78965558	48116686	25.52		8.57334e+08	18058352	7.59016e+08	544802876	29.0212		94488570	17870654	681814946	2.64725e+08	27.9799		244890726	33155415	4.29072e+08	2.35706e+08	27.8124		161096471	27.2633		489381822	654383948	41073291	3.94946e+08	28.5571		1.16747e+09	187693296	1.59582e+09	9.83664e+08	29.8736		2563663140	36100415	2814396059	1.80472e+09	30.7491		8.87148e+08	7.88034e+08
RXN31920.1	A0A498NJ14	DAZ-associated 1-like isoform X2	161259348	98676160	5.00907e+08	2.53614e+08	27.9181		154951774	16645622	487434312	219677236	27.7108		8959352		39803144	24381248	24.5393		6.33129e+08	778072698	675328485	6.9551e+08	29.3735					290023782	514397352	405199100	4.03207e+08	28.5869		2.92535e+08		189758552	2.41147e+08	27.8453		72941568	119238202	126576032	106251934	26.6629			158044439
RXN07650.1	A0A498LHJ3	Unconventional myosin-Ic isoform X1	119817504	48061816	66193828	7.80244e+07	26.2174		95476965		154823065	125150015	26.8991				290516534	290516534	28.114		4415097		3008092	3.71159e+06	21.8236		171640848	27.3548		137350439	257575194	75927160	156950931	27.2257		1136908412	133597621	1732151758	1.00089e+09	29.8986		44416977	50294192	79385360	5.80322e+07	25.7903		1.15949e+08	9585628
RXN17115.1	A0A498MIC8	Traf2 and NCK-interacting kinase-like isoform X2	1013216320	824925443	3716258927	1.85147e+09	30.786		142162528	23565472	3.18339e+08	1.61356e+08	27.2657		77429704		352510328	214970016	27.6796		2.57882e+08	3.14198e+08	138105033	2.36728e+08	27.8187		891191287	29.7312		659126546	876127516	499467776	6.78241e+08	29.3372		288308895	1.51188e+07	4.15431e+08	2.39619e+08	27.8362		111674934	66230140	342129406	1.73345e+08	27.3691		4.11645e+08	3.44757e+08
RXN26754.1	A0A498N514	3 (2),5-bisphosphate nucleotidase 1	5.18367e+07	2.08213e+07	24154194	32270757	24.9437		241339838		627212291	4.34276e+08	28.694								3.27031e+06	3943178	15330249	7.51458e+06	22.8413		691364370	29.3649			5.4511e+08	9689769	2.774e+08	28.0474		497687893	6.01676e+08	762298710	6.20554e+08	29.209		2321090444	1733040220	580732323	1544954329	30.5249		378557171	1082130726
RXN27304.1	A0A498N6J0	Proteasome subunit beta (EC 3.4.25.1)	441844572	218561558	1722303804	7.94237e+08	29.565		586343500	6.91791e+08	2.06762e+09	1.11525e+09	30.0547		73381658	30228852	181959312	9.51899e+07	26.5043		764110570	8.00723e+08	4.78901e+08	6.81245e+08	29.3436		331245196	28.3033		636692580	889061232	477328504	6.67694e+08	29.3146		643421504	18034900	710872250	4.57443e+08	28.769		1700528440	89339056	1864197335	1.21802e+09	30.1819		4.22271e+08	3.30634e+08
RXN31630.1	A0A498NIC6	Kinesin KIF20A isoform X1	584341658	3.5072e+08	1330317617	7.55126e+08	29.4921		141613556		309011302	225312429	27.7474								4.13432e+08	5.46605e+08	3.01722e+08	4.20587e+08	28.6478		1.2156e+09	30.179		555830009	327555339	764878390	549421246	29.0333		202785488		133449884	168117686	27.3249		45649988	1.31576e+08	4.67551e+07	7.46604e+07	26.1538			4.34967e+07
RXN27030.1	A0A498N1V4	F-box only 40-like protein	43894948	22697295	27509162	31367135	24.9028				27830250	27830250	24.7302														9069565	23.1126			34703944	32242376	33473160	24.9965				34562744	34562744	25.0427		361128976	54424202	265292221	2.26948e+08	27.7578			28133526
RXN20182.1	A0A498ML07	PDZ and LIM domain 2-like protein	4.00397e+08	51310436	2.28975e+08	2.26894e+08	27.7574															2.70989e+07	18003012	2.25509e+07	24.4267
RXN27200.1	A0A498N2D4	Neuronal-specific septin-3-like isoform X1	129043375	109524454	61106092	99891307	26.5739				16868820	16868820	24.0079		34887580		153337368	94112474	26.4879			2.39424e+06		2.39424e+06	21.1911		377359295	28.4914								299420607	11368118	297451196	2.02747e+08	27.5951			49272920		49272920	25.5543			1.48692e+08
RXN27203.1	A0A498N4S2	Glypican-1-like protein	80194376	151058791	117431764	1.16228e+08	26.7924		4.40198e+08		436890183	4.38544e+08	28.7081		8575247		13730307	11152777	23.4109																			6629999	6629999	22.6606									4.13167e+07
RXN03521.1	A0A498L557	Vitamin D-binding-like protein	145370916	63935742	75398133	94901597	26.4999		72516451		324636437	198576444	27.5651		447012004	85340812	2310320804	9.47558e+08	29.8196								378018976	28.4939		123016596	210079928	26524491	1.19874e+08	26.8369		106482060		42245217	7.43636e+07	26.1481		4154562266	785470454	3182710210	2.70758e+09	31.3344		365314089	1.306e+09
RXN28988.1	A0A498N4E7	Sushi repeat-containing SRPX-like isoform X1	34075744	35882333	38555564	3.61712e+07	25.1083								85233478		834391515	4.59812e+08	28.7765
RXN10578.1	A0A498LQ72	Ribosome-binding 1-like isoform X1	21489660	49408800	77741881	4.95468e+07	25.5623		125623652		209563393	1.67594e+08	27.3204				62811007	62811007	25.9045		9.55089e+07	4.24026e+07	2.25676e+08	1.21196e+08	26.8528		302836596	28.174		131270324	2.24884e+08	165041074	1.73732e+08	27.3723		184303896		5.86276e+07	1.21466e+08	26.856		128019356	66331830	1.0268e+08	9.90105e+07	26.5611		725888983	1.07079e+08
RXN17309.1	A0A498M8K8	Midkine a	407277612	37497860	731114184	3.91963e+08	28.5461		116429216		216649524	166539370	27.3113														33354706	24.9914		70670152	48645896	18220970	4.58457e+07	25.4503		78458688		35261628	56860158	25.7609									50035648
RXN09448.1	A0A498LM03	Fibulin-7 isoform X1	38530020	23454888	4.0615e+08	1.56045e+08	27.2174								40997624		104954702	72976163	26.1209
RXN34048.1	A0A498MW18	60S ribosomal L22	1014286824	204084288	943016924	7.20463e+08	29.4243		17902778		330276894	174089836	27.3753		82118810			82118810	26.2912		1181435207	768099149	9.23915e+08	9.57816e+08	29.8352		1262099993	30.2332		608048702	392346546	2329894682	1.1101e+09	30.048		866516848	36401044	1223629418	7.08849e+08	29.4009		155191015	135142964	378142068	222825349	27.7313		188591986
RXN33378.1	A0A498NNN0	Zyxin	319504271	28023536	294448789	2.13992e+08	27.673										42641532	42641532	25.3458		5.03803e+06			5.03803e+06	22.2644		46155016	25.46			3.73824e+06		3.73824e+06	21.8339				46225216	46225216	25.4622									239671824
RXN18643.1	A0A498MFP7	26S protease regulatory subunit 4	65207922	3.96538e+07	210527430	1.0513e+08	26.6476		19919408	2.47843e+06		1.11989e+07	23.4169		397666560			397666560	28.567				7390488	7390488	22.8172		641518375	29.2569		4.64042e+08		560900691	5.12471e+08	28.9329		1232708132		13950504	623329318	29.2154			293800235	589901133	441850684	28.719		2.39956e+09	643207158
RXN16580.1	A0A498M7V0	60S ribosomal L24	5.02679e+08	413104704	2356223524	1.09067e+09	30.0226		1.14179e+09	1.08041e+09	2139323519	1.45384e+09	30.4372		52998808	44312656	39288900	4.55335e+07	25.4404		4914599177	3.99079e+09	3.40669e+09	4.10403e+09	31.9344		470155848	28.8086		485889677	1564542842	2.16824e+09	1.40622e+09	30.3892		1029115712		321487810	675301761	29.331		242308764	252329456	852724780	449121000	28.7425		1.47867e+09	7.21221e+08
RXN29373.1	A0A498NAE3	ATP synthase F(0) complex subunit mitochondrial		142715470	994342325	5.68529e+08	29.0827		2471603365	1813293032	6.53332e+09	3.60607e+09	31.7478		61600636	158244828	596495568	2.72114e+08	28.0196		6.17272e+09	2.08464e+09	3.85348e+09	4.03695e+09	31.9106		520779382	28.9561		1343283097	834309748	3364274747	1.84729e+09	30.7828		295221441	14083170	1.55146e+09	6.20256e+08	29.2083		838398972	9.70061e+09	2.60947e+09	4382827027	32.0292		2.8149e+09	255608420
RXN29109.1	A0A498N3Z6	PDZ and LIM domain 7 isoform X2	245695898	46559928	374210941	222155589	27.727								65484500		112937084	89210792	26.4107		18640222	9240551	8.27132e+06	1.20507e+07	23.5226		138169710	27.0419			55247654	47414576	51331115	25.6133		4.72885e+06		576054965	2.90392e+08	28.1134		28979020	525772254	63540617	206097297	27.6188			1.81046e+08
RXN07292.1	A0A498LH99	Sorting nexin-12 isoform X2	2178248336	457321952	1427298140	1354289476	30.3349		180071783	351664828	673749542	4.01829e+08	28.582								10292348	7.22295e+06		8.75765e+06	23.0621		166797901	27.3135		406003051	254493140	260350426	3.06949e+08	28.1934		284851783		101981408	1.93417e+08	27.5271		149859070	38019704	241677208	1.43185e+08	27.0933		271723788	93242472
RXN09616.1	A0A498LR99	Glutamate mitochondrial	25886876	579208915	117878378	2.40991e+08	27.8444		7.26795e+09	2963242277	9.68383e+09	6.63834e+09	32.6282		252858036	14243459	2581400401	949500632	29.8226		2.45123e+09	1.44002e+09	3.0178e+09	2.30302e+09	31.1009		7061402936	32.7173		2004689127	2385534376	1160206496	1850143333	30.785		5108189586	357407422	6832991088	4.09953e+09	31.9328		2016503272	1.05358e+10	1807924768	4.78673e+09	32.1564		1.34674e+10	3.59361e+09
RXN07640.1	A0A498LHI3	Dehydrogenase reductase SDR family member 13-like protein	126386484	8468630	60745680	6.52003e+07	25.9584		38703297		1.11702e+08	7.52028e+07	26.1643		19797884120	3.81782e+10	14284960324	2.4087e+10	34.4875		1.75572e+07		32149375	2.48533e+07	24.5669		87615276	26.3847		13768700	18413894	166533053	66238549	25.9812		34820100	21656734	150080381	68852405	26.037		491879009	18167548	3941644581	1483897046	30.4667		36676270	148723147
RXN22517.1	A0A498N161	Calpain-2 catalytic subunit-like protein	137450010	95798091	203900364	145716155	27.1186		75568400		9073710	42321055	25.3349		221429700		1485741894	853585797	29.669								2241208346	31.0616		570481555	7.0852e+08	98927187	4.5931e+08	28.7749		1087224324	24767436	1.49015e+09	8.67379e+08	29.6921		1977790244	33648508	1.27471e+09	1.09538e+09	30.0288		81013164	1.19186e+08
RXN07461.1	A0A498MP37	Plasminogen-like protein	150090622	72773254	72259288	98374388	26.5518		521338400		1.1669e+09	8.44121e+08	29.6529		457417334	158806092	3517844628	1.37802e+09	30.36		7.11747e+07		2.61975e+07	4.86861e+07	25.537		449871671	28.7449		176909864	368550805	57013750	2.00825e+08	27.5814		156369290	112233749	125833995	1.31479e+08	26.9703		13524479815	949069684	10214626483	8229391994	32.9381		351020798	2413929916
RXN07069.1	A0A498LFN2	Phosphatase 1F-like protein	50939558	51879174	19475254	40764662	25.2808		9120930		5.1743e+07	3.0432e+07	24.8591		184024742		133424636	158724689	27.242								50461892	25.5887				6906515	6906515	22.7195		18171204			18171204	24.1152		110769002	49638040	3.1237e+07	6.38814e+07	25.9289			14664323
RXN19810.1	A0A498MFI3	Hydroxyacylglutathione mitochondrial isoform X1	143370553	14569163	108599734	8.88465e+07	26.4048		178449291	120253705	9.09539e+08	4.02747e+08	28.5853														95256616	26.5053		5.84776e+06		50959184	2.84035e+07	24.7596		8.32823e+07	201809109	221719200	1.68937e+08	27.3319		3.7053e+08	7.76389e+07	2.34738e+08	2.27636e+08	27.7622		181238400	18770302
RXN23725.1	A0A498N4C6	Tropomodulin-2-like protein	150188700	34030286	239161528	141126838	27.0724		1.92515e+08	388349884	639129002	4.06665e+08	28.5993		140067854		644218372	392143113	28.5468			60438368		60438368	25.849		1.82392e+08	27.4425		317138996	402760560	3.56054e+08	3.58651e+08	28.418		8689014			8689014	23.0508		24502032	48416258		36459145	25.1198		145785076	272861122
RXN12080.1	A0A498LVA3	Retinol-binding 4-A-like protein	1345687049	30768141	1710727826	1.02906e+09	29.9387		3.73764e+08		9.86105e+08	6.79934e+08	29.3408			66888712	134627440	100758076	26.5863								546483360	29.0256		8.73264e+07	73845236	112010470	9.10607e+07	26.4403		181206752		142391796	161799274	27.2696		10290931646	240576082	9.36168e+09	6.63106e+09	32.6266		2.10945e+08	1588995693
RXN34539.1	A0A498NSH5	Vesicle-trafficking SEC22b-B isoform X1	190080120	103641488	1024842340	439521316	28.7114			186665871	213303954	1.99985e+08	27.5753								4.89561e+07		11319711	3.01379e+07	24.8451					49943128	4.10266e+07		4.54849e+07	25.4389		475293536		71349152	273321344	28.026				7.04237e+07	7.04237e+07	26.0696			1.03958e+08
RXN20337.1	A0A498MTZ4	Proteasome endopeptidase complex (EC 3.4.25.1)	71084946	69323253	669636756	270014985	28.0085		103261535	341313208	338578885	2.61051e+08	27.9598		29702750	155888625	41260524	7.56173e+07	26.1722		4.38655e+08	615837849	3.19667e+08	4.58053e+08	28.7709		6.31163e+08	29.2334		1.47761e+09	794299603	1383318790	1.21841e+09	30.1824		2.84301e+08		1.23573e+08	203937033	27.6035		13318197	500384473	430486020	3.1473e+08	28.2295		609803368	3.2919e+08
RXN32300.1	A0A498NK48	Uncharacterized protein	703291650	262479498	47585284	3.37785e+08	28.3315		5.65224e+08		2080935798	1.32308e+09	30.3013		54884052	3.8243e+08		2.18657e+08	27.7041								163310208	27.283			248252641	97007276	1.7263e+08	27.3631				52505920	52505920	25.646		1.67526e+10	1.56582e+09	16361849344	1.15601e+10	33.4284		344031972	2075852680
RXN11811.1	A0A498LUF6	Methylglutaconyl-mitochondrial	89953012	20969551	40178332	50366965	25.586			1.62429e+08	145166106	1.53798e+08	27.1965			16898334		16898334	24.0104		2.68955e+08	3.66359e+08	2.18242e+08	2.84519e+08	28.0839		448706098	28.7412		5.85858e+07	23493053	137382159	7.31537e+07	26.1244		79005262		229303344	154154303	27.1998		9.50804e+07	1538496131	137167633	5.90248e+08	29.1367		7.85045e+08	51192695
RXN28932.1	A0A498NAQ8	ATP synthase subunit mitochondrial	543275110	610204990	4003523562	1.719e+09	30.6789		4.25121e+08	10308500476	2.72869e+09	4.48744e+09	32.0632		265622372	6.08141e+08	378401770	4.17388e+08	28.6368		1.39757e+09	1.70303e+09	1.07915e+09	1.39325e+09	30.3758		5197239186	32.2751		4073078562	2609121724	6445510058	4375903448	32.0269		925665356		1688952126	1307308741	30.284		354740046	19228166179	974432666	6852446297	32.674		3.82529e+09	380463526
RXN35982.1	RXN35982.1	V-Set And Immunoglobulin Domain-Containing 10-Like Isoform X1	211190042	119583570	64207708	131660440	26.9722		289301564	1116474399	8.23027e+08	7.42934e+08	29.4687		10495530	73940058	75311056	5.32489e+07	25.6662		8.73225e+08	1274264667	8.82637e+08	1.01004e+09	29.9118		1175395600	30.1305		2.29833e+08	2.54477e+08	1.47107e+08	2.10472e+08	27.6491		309680908		652879239	4.8128e+08	28.8423		212167174	6718939842	416035931	2449047649	31.1896		8.64386e+08	120382127
RXN10349.1	A0A498LPL8	Complement component C9	2.4088e+07	64245308	134058821	7.41307e+07	26.1436		1.48529e+08		283918085	2.16224e+08	27.6879		710154390	15853191	2076811313	9.34273e+08	29.7993								104950677	26.6451		11556669	18278170		1.49174e+07	23.8305		6.94055e+06		2.77621e+07	1.73513e+07	24.0485		7833538446	443827711	7.77701e+09	5.35146e+09	32.3173		52725588	1.90619e+09
RXN25327.1	A0A498N9G7	Histone H2A	250301118	1291643872	2.26063e+09	1.26752e+09	30.2394		134589391	1.82553e+08	6.42001e+08	3.19714e+08	28.2522		67280832	13119177	147520334	7.59734e+07	26.179		317366704		13902287	1.65634e+08	27.3034		2675299935	31.3171		3.58e+08	2029018502	3529562487	1.97219e+09	30.8772		2400865340	30487280	500655778	9.77336e+08	29.8643		252595350	1887273868	6.87893e+08	9.42588e+08	29.8121		1073228297	9.47559e+09
RXN34504.1	A0A498NSI9	Chymotrypsin-like elastase family member 2A	126179996	112737151	300851002	1.79923e+08	27.4228																				2308697906	31.1044								12498111250	1.40187e+10	19176284768	1.5231e+10	33.8263								1.96465e+06
RXN29337.1	A0A498NP55	Bifunctional epoxide hydrolase 2	105862111	85199732	65735584	8.55991e+07	26.3511		5692268945	1148440744	8.46228e+09	5.101e+09	32.2481		1130899676	6173606	2741115452	1292729578	30.2678								1239342382	30.2069		1.56371e+09	2708814991	5.03244e+08	1.59192e+09	30.5681		902611876	228780484	1902593295	1.01133e+09	29.9136		5.43384e+10	2449578036	3.42139e+10	3.0334e+10	34.8202		3.38717e+09	3.83493e+09
RXN26244.1	A0A498N3E4	Acidic leucine-rich nuclear phospho 32 family member E isoform X1	90729928	36515896	79290744	6.88455e+07	26.0369		117332048	1926497180	5.55295e+08	8.66375e+08	29.6904		343183085	514526564	152011016	336573555	28.3263		2.09005e+07	7903927	32908229	2.05709e+07	24.2941		656301348	29.2898		1099980149	1668990536	1135442406	1.30147e+09	30.2775		274805866		284199702	279502784	28.0583		35348764	584593707	690476662	4.36806e+08	28.7024		1.36221e+09	220202806
RXN06886.1	A0A498LIP3	EH domain-containing 1-like protein		99527017	285859588	1.92693e+08	27.5217		2.86783e+08		9.59137e+08	6.2296e+08	29.2146		62161552		795439628	428800590	28.6757		4.51511e+07	3.1323e+07	3.00344e+08	1.25606e+08	26.9043		1124719360	30.0669		162691318	6.39771e+08	1.95697e+08	3.3272e+08	28.3097		1.45467e+09	392485732	2.53881e+09	1461990130	30.4453			91387570	2.2506e+08	1.58224e+08	27.2374		2616089242	2.14402e+08
RXN27779.1	A0A498N0H7	Glutamate dehydrogenase	12796439	79349300		4.60729e+07	25.4574		8.17063e+07	17718896	1.008e+08	6.67417e+07	25.9921		1185464036	2.25934e+07	590986312	5.99681e+08	29.1596		13080301	1.49247e+07	48363946	2.54563e+07	24.6015		573970640	29.0964		774639318	6.53022e+08	424613086	6.17425e+08	29.2017		740923260	9331633	342613488	3.64289e+08	28.4405		153766280	333320288	148372562	211819710	27.6583		694289223	510856914
RXN34167.1	A0A498NRJ2	Peptide-N4-N-acetyl-beta-D-glucosaminylasparagine amidase F	99610240	93397558	1531260016	574755938	29.0984		9.05966e+08	55794182	1605079747	8.55613e+08	29.6724		23924772	41704028	183227152	82951984	26.3058		2.94263e+07	13881536	70083130	3.7797e+07	25.1718		7.26982e+08	29.4373		575074739	1409009737	1092459522	1025514666	29.9337		753915622	162440900	1880670603	932342375	29.7963		197764074	94590233	374718698	2.22358e+08	27.7283		401186556	454967689
RXN28660.1	A0A498N6H3	Uncharacterized protein	258239565	9.9146e+09	261945504	3.47826e+09	31.6957								107682273	66613208	185740228	120011903	26.8386																														89120567
RXN08470.1	A0A498LJQ3	Proteasome subunit beta (EC 3.4.25.1)	606674128	447662880	2081618226	1.04532e+09	29.9613		394804267	211072078	840615897	4.82164e+08	28.8449		72837968		89766280	81302124	26.2768		5.96161e+08	1.11953e+09	563369974	7.59685e+08	29.5008		233149615	27.7967		92497160	92100888	154040568	1.1288e+08	26.7502		179872472	14808743	175045339	1.23242e+08	26.8769		31517474	653712440	2.36625e+08	3.07285e+08	28.195		1.35576e+08	105158834
RXN08742.1	A0A498LLR3	Influenza virus NS1A-binding-like protein	217615312	30915050	124314764	1.24282e+08	26.889																							67885382	230336217	139559590	145927063	27.1207		40813904			40813904	25.2826								141328900	49747967
RXN31927.1	A0A498NJU7	Collagen alpha-1(II) chain isoform X2	135625184	11834758	80666914	7.60423e+07	26.1803		10222926			10222926	23.2853		1933608800	191635536	2155125632	1.42679e+09	30.4101												9.62498e+07	60924680	7.85872e+07	26.2278															9584657
RXN18116.1	A0A498MGQ3	ES1 mitochondrial-like protein	340348804	288519305	609970466	4.12946e+08	28.6214		7.92204e+08	379695994	1976947834	1.04962e+09	29.9672								722502226	7.52253e+08	4.76287e+08	6.50347e+08	29.2766		975171466	29.8611		598890990	4.04812e+08	355904442	4.53202e+08	28.7556		165944686	28475380	628075675	274165247	28.0305		832322537	1.48666e+09	926450458	1.08181e+09	30.0108		254334026	94175574
RXN36502.1	A0A498NWE3	Carboxypeptidase A1-like protein	100794770	31952141	328481550	1.53743e+08	27.1959																				3195685373	31.5735								2.3748e+10	1952209083	25088380312	1.69295e+10	33.9788									50573292
RXN05372.1	A0A498LAX4	Citrate synthase	212659948	115685426	597132676	3.08493e+08	28.2007		4254254449	4.93083e+09	7.44392e+09	5.543e+09	32.368		1643181652	522302475	3238491356	1801325161	30.7464		99053543	9.15856e+07	103650502	9.80966e+07	26.5477		3180148625	31.5664		1.45277e+09	1.5725e+09	1.09857e+09	1.37461e+09	30.3564		5287817603	2273457490	4923886314	4161720469	31.9545		253403638	1.10536e+10	2.25576e+09	4.52094e+09	32.074		7.97926e+09	7.25024e+08
RXN04990.1	A0A498N3I9	Synaptobrevin-like protein	152620428	75988216	867061560	3.65223e+08	28.4442		287442605	3.55044e+08	5.68129e+08	4.03539e+08	28.5881									3.9805e+06	1.16091e+07	7.79478e+06	22.8941		56324879	25.7473		92116334	6.11319e+07	143040898	9.8763e+07	26.5575		29477046		31717807	3.05974e+07	24.8669		39053746	26489894	37471999	3.43385e+07	25.0333		3.46951e+07	5.87902e+06
RXN24621.1	A0A498MW09	Asparagine--tRNA cytoplasmic	36982324	124035024	150502424	103839924	26.6298		5.98472e+09	4.93972e+08	6476683810	4318459466	32.0079		783544894	149976366	2182987132	1.03884e+09	29.9523		7.46751e+06	24513155		1.59903e+07	23.9307		1765804016	30.7177		4.80256e+08	5.82216e+08	2.24818e+08	4.29097e+08	28.6767		786414928	221817749	728078130	578770269	29.1084		1374818844	154891210	2269659305	1266456453	30.2382		1.03335e+09	1.56922e+08
RXN03863.1	A0A498L931	Isocitrate dehydrogenase [NAD] subunit, mitochondrial	1.3616e+07	24154979	8.13316e+07	3.97009e+07	25.2427		1.55226e+09	1.53716e+09	4.56968e+09	2.55303e+09	31.2496		75845558			75845558	26.1766		705295784	2.51536e+08	2.13737e+09	1.0314e+09	29.942		546120856	29.0246		2.7052e+08	492193088	2.04595e+08	3.22436e+08	28.2644		1.83722e+08		267063414	2.25393e+08	27.7479		142573875	738286999	529280860	4.70047e+08	28.8082		1478360107	2.31886e+08
RXN34505.1	A0A498NRA9	Chymotrypsin-like elastase family member 2A	79474064	38787520	1.82739e+08	1.00334e+08	26.5802																				1289390820	30.264								8966889270	393807053	4805012384	4.7219e+09	32.1367
RXN15567.1	A0A498MEW8	Eukaryotic translation initiation factor 5A (eIF-5A)	131017668	9267172	262293136	1.34193e+08	26.9997		7.42711e+07	199767440	67816254	1.13952e+08	26.7638														10825995	23.368			36291636		36291636	25.1131				25039212	25039212	24.5777								37277811	9581268
RXN29466.1	A0A498NDP2	Myoglobin	160167189	665628996	61496392	2.95764e+08	28.1399		5.15568e+08	151901971	4.95145e+08	387538278	28.5298		200404752	362042429	274770968	2.79073e+08	28.0561								5557100217	32.3717		19288987958	2.09575e+10	15444856946	1.85638e+10	34.1118		2859171420	145882316	1016374802	1.34048e+09	30.3201		1.56409e+10	2.59889e+11	21235393031	9.89219e+10	36.5256		5.46904e+10	5939156536
RXN02326.1	A0A498L675	Histone H1-like protein	93963132	25938236	7.66623e+07	6.55212e+07	25.9655		5.02378e+09	65818955	1.17584e+10	5.61601e+09	32.3869		158669584	1050314741		6.04492e+08	29.1711		1.12406e+08		1.86876e+08	1.49641e+08	27.1569		425844785	28.6658		3.69808e+09	1179377328	7.02705e+09	3.96817e+09	31.8858		832503065		1.18231e+09	1.00741e+09	29.908		2451983996	605042516	2.86699e+10	1.05756e+10	33.3		1.49096e+09	1218737567
RXN31710.1	A0A498NIH7	T-complex protein 1 subunit gamma	56757828	1.49986e+08	249192836	1.51979e+08	27.1793		2420312082	281694046	2.38061e+09	1.69421e+09	30.658		705625437	58597499	2266006298	1.01008e+09	29.9118		2109203169	9.30473e+08	3.05734e+09	2.03234e+09	30.9205		1.21223e+09	30.175		967577907	6.18815e+08	8.55723e+08	8.14039e+08	29.6005		425047274		311417912	368232593	28.456		383094154	5.5111e+08	773321027	5.69175e+08	29.0843		7.90262e+08	4.54592e+08
RXN05685.1	A0A498LVL4	Ras-related Rab-18	39549304	192503882	541934984	2.57996e+08	27.9428		375926414		7.99124e+08	5.87525e+08	29.1301								30995987	9982259	22720308	2.12329e+07	24.3398		109340028	26.7042		227779702			227779702	27.7631			98676924	95693556	97185240	26.5342			102092296		102092296	26.6053			139574580
RXN08433.1	A0A498LLL2	Complement factor I	300755220	155625655	423261910	2.93214e+08	28.1274		62498104		61135770	61816937	25.8815		76247857	1.07053e+08	1.72555e+09	6.36285e+08	29.2451								370270960	28.464		41542192	204670175	18414068	8.82088e+07	26.3944		26068586		89032904	57550745	25.7783		3034658185	292184242	4.0663e+09	2.46438e+09	31.1986		416242622	928035608
RXN29053.1	A0A498N9Q6	S-formylglutathione hydrolase	169684052	33802148	10292228	71259476	26.0866		89855724	75372408	1.92563e+08	1.19264e+08	26.8296								94649732	7.12876e+06	80736905	6.08385e+07	25.8585					15708148		43708322	29708235	24.8244								111695208	40461514	149065945	1.00408e+08	26.5813		49138839
RXN11843.1	A0A498LW95	Histidine triad nucleotide-binding 1	1582930055	392062960	3318758904	1764583973	30.7167		23193318	300822624	209785385	1.77934e+08	27.4068			1.95275e+06	309164676	1.55559e+08	27.2129		22434647	2.05661e+07		2.15004e+07	24.3579		190599894	27.506		8.01185e+08	4.25446e+08	490124189	5.72252e+08	29.0921		120649184		913687928	517168556	28.9461		26802716	718745214	292381075	345976335	28.3661		244243874	573140608
RXN10981.1	A0A498LS91	PRKC apoptosis WT1 regulator-like isoform X1	121262628	124396880	134511216	1.26724e+08	26.9171										86310018	86310018	26.363												34901183		34901183	25.0568		60622688			60622688	25.8534									12499946
RXN07555.1	A0A498LQA7	Kinase suppressor of Ras 1-like isoform X3	519191678	265468263	877504182	5.54055e+08	29.0455		96601073		71879429	84240251	26.328		67692866	48510472		58101669	25.7921		10326285	50099019	7.68444e+07	4.57566e+07	25.4475		3.84621e+09	31.8408		1.24304e+09	1.36907e+09	3128357503	1.91349e+09	30.8336		82753496	3.71893e+08	2427001439	9.60549e+08	29.8393		942755238	215494711	1046997445	7.35082e+08	29.4533		1606492264	482229224
RXN31185.1	A0A498NH62	Inter-alpha-trypsin inhibitor heavy chain H3-like protein	169850212	25032578	247928188	1.47604e+08	27.1372				25921906	25921906	24.6277		118284756	7.31079e+06		6.27978e+07	25.9042												78974712		78974712	26.2349		502525335		182981560	3.42753e+08	28.3526		331157708	109313814	319896130	253455884	27.9172			193331495
RXN21042.1	A0A498MN50	T-complex 1 subunit beta	34498596	7.38233e+07	92601056	6.69743e+07	25.9971		2.05379e+09	85505672	3230574260	1.78996e+09	30.7373		587574341		1027702824	8.07639e+08	29.5891		1.72467e+09	1.35388e+09	2.47085e+09	1.8498e+09	30.7847		508140760	28.9207		420431942	6.29946e+08	5.71992e+08	5.4079e+08	29.0105		282542684		93072920	187807802	27.4847		251292097	3.78465e+08	540478326	3.90079e+08	28.5392		5.5074e+08	513550623
RXN18565.1	A0A498MN67	Transitional endoplasmic reticulum ATPase-like protein	50093460	154014888		102054174	26.6048		338073136	188889888	5.8507e+08	3.70678e+08	28.4656		239275720	129058456	1201595804	5.2331e+08	28.9631		125608586	1.91213e+08		1.58411e+08	27.2391		2833054440	31.3997		66799672	178231256	39660652	9.48972e+07	26.4999		344893384		315356564	330124974	28.2984		371165440	353109496		362137468	28.432		332268472	196935277
RXN32786.1	A0A498NLZ1	Peptidylprolyl isomerase (EC 5.2.1.8)	76956837	144404912	94096836	1.05153e+08	26.6479										126702944	126702944	26.9169								25148280	24.584		62173349	6.87362e+07		6.54548e+07	25.964															9374362
RXN22942.1	A0A498LG84	Sorcin	168242278	162105240		165173759	27.2994		21343996	655498977	31503016	2.36115e+08	27.8149														295200294	28.1371		212920518	247175483	577805652	3.45967e+08	28.3661		1045110874	48304504	751895236	615103538	29.1963			53382448		53382448	25.6699		2.43622e+08	26418622
RXN05708.1	A0A498LBY9	Medium-chain specific acyl-mitochondrial	132249162	533285464	345777927	3.37104e+08	28.3286		1.25271e+09	1524742333	3.77946e+09	2.18564e+09	31.0254		244898676		644710616	444804646	28.7286		2.84437e+09	2.80911e+09	4.07943e+09	3.2443e+09	31.5953		6008750387	32.4844		1899066787	1832201574	7.74482e+08	1.50192e+09	30.4842		528758970	102681889	703511494	4.44984e+08	28.7292		2239062059	1.28986e+10	4.72325e+09	6620310768	32.6243		1.03794e+10	496347809
RXN05283.1	A0A498LD14	Sorting nexin-1-like protein	163356658	115207557	219239478	1.65935e+08	27.306		76167197	23568686	333993491	144576458	27.1073		24775204		407092740	215933972	27.686		6.78995e+07	23737196	40332405	4.39897e+07	25.3907		552656660	29.0418		230464028	170209917	200797168	200490371	27.579		133036534		104664668	118850601	26.8246		246554262	62807096	265825365	1.91729e+08	27.5145		9.74469e+08	4.10279e+08
RXN22759.1	A0A498MMR3	Vascular cell adhesion 1-like protein	80691202	78966132	95171164	8.49428e+07	26.34		294373490		226982933	2.60678e+08	27.9577		45816404		130457744	88137074	26.3932								127911068	26.9306		52346647	89728338	67121768	69732251	26.0553		182901027	61715030	82181496	1.08933e+08	26.6989		28584258	248214684	10849293	95882745	26.5148			8.88057e+07
RXN26575.1	A0A498NBE7	Leukocyte elastase inhibitor-like protein		20200726	29411606	24806166	24.5642		523771818	275257935	1059367219	6.19466e+08	29.2064		8976557		537787216	2.73382e+08	28.0263								250960897	27.9029		460403587	1441936487	318815714	7.40385e+08	29.4637		502832942	167404480	926964430	5.32401e+08	28.9879		807679707	27575060	1824970776	8.86742e+08	29.7239		2.64525e+08	960098660
RXN10255.1	A0A498LXY1	14 kDa apolipo	633419568	7.47741e+10	769304778	2.53923e+10	34.5637		553927649	1168741636	1573148815	1.09861e+09	30.033		1335886171	2141746454	3391712003	2.28978e+09	31.0926								8.13461e+10	36.2434		606964770	1.39895e+10	641371148	5.07929e+09	32.242		173056282	836693158	1223697842	7.44482e+08	29.4717		10085354664	52032365755	1.66866e+10	2.62681e+10	34.6126		1.38217e+10	7.03079e+10
RXN15670.1	A0A498M586	Epidermal differentiation-specific-like protein	291639560	1222130056	229410380	5.8106e+08	29.1141		303903583	597910110		4.50907e+08	28.7483									6.12485e+06		6.12485e+06	22.5462		46006048536	35.4211		1196466440	4765995688	4109801460	3357421196	31.6447			23965142	94234420	59099781	25.8166		36519781018	5.11348e+09	32203405408	2.46122e+10	34.5187		4.60618e+09	1365155748
RXN32563.1	A0A498NKZ2	Cadherin-4-like isoform X1	87261936	77456753	329775374	1.64831e+08	27.2964				632082775	632082775	29.2355		456690615	31685783	1207263234	5.65213e+08	29.0742			4.53478e+06		4.53478e+06	22.1126		1.50354e+09	30.4857		11734101	197439789	12797760	73990550	26.1408		105603986		145041231	1.25323e+08	26.9011		3364720580	826522536	3200269033	2463837383	31.1983		64939449	1.24935e+09
RXN33307.1	A0A498NP32	Phospholipid hydroperoxide glutathione mitochondrial-like protein	393074592	90410420	713729552	3.99072e+08	28.5721		256528236	576370538	4.38173e+08	4.23691e+08	28.6584								5.021e+06			5.021e+06	22.2595		284797200	28.0854		253052572	23857384	151627312	142845756	27.0899		89065250	25291859	176361872	96906327	26.5301			293928796	40693192	167310994	27.318		369722880
RXN33387.1	A0A498NPB6	60S ribosomal L18	97249185	80723112	934293745	3.70755e+08	28.4659		193789760		1734957123	9.64373e+08	29.845								1.18109e+09	1.45444e+09	9.70068e+08	1.20187e+09	30.1626		98513608	26.5538		146434666	1.57397e+09	4.05659e+08	7.08686e+08	29.4006		482123734		800103449	6.41114e+08	29.256		3.43376e+07	174187912	631875133	2.80134e+08	28.0615		831706742	366584571
RXN16785.1	A0A498LKX7	Sorting nexin-3	834491632	125624702	528833444	4.96317e+08	28.8867			35933036	1.7705e+07	2.6819e+07	24.6768									13628518		13628518	23.7001		171923126	27.3572		7.65074e+06		9026673	8.33871e+06	22.9914		183817952			183817952	27.4537								242484620	36175085
RXN10576.1	A0A498LTY5	Glycine N-acyltransferase 3	211289618	13379422	443645082	222771374	27.731			154780701	10927098	8.28539e+07	26.3041			28263072		28263072	24.7524			2.4137e+06		2.4137e+06	21.2028		1546695551	30.5265		253032030	57269763	208558388	1.72953e+08	27.3658		76659304		134435104	105547204	26.6533								2.91239e+08	112284656
RXN23124.1	A0A498MUL6	Inter-alpha-trypsin inhibitor heavy chain H3-like isoform X1	44897076	241888528	91804440	1.26197e+08	26.9111		1.92445e+08		1.08512e+09	6.38782e+08	29.2507		925816610	193315275	3342661139	1.48726e+09	30.47		2.98225e+06			2.98225e+06	21.508		767587681	29.5158		158758209	410628966	1.44191e+08	2.37859e+08	27.8255		33628610	6.11316e+06	184818686	7.48535e+07	26.1576		20857990929	1410375402	18352840081	1.35404e+10	33.6566		3.63203e+08	3.65889e+09
RXN26312.1	A0A498N3B3	60S ribosomal L14	723516436	298643604	1551226203	8.57795e+08	29.6761		319221198	57207428	1511231676	6.2922e+08	29.229				44508608	44508608	25.4076		2747213631	1.67671e+09	1.66984e+09	2.03125e+09	30.9197		2290047428	31.0927		6.61671e+08	8.3053e+08	1.41245e+09	9.68217e+08	29.8508		1162088942	380522820	1300289432	9.47634e+08	29.8198		236619724	76122498	577003712	296581978	28.1439		2.10075e+08	240829230
RXN17553.1	A0A498MCL6	Serine threonine-phosphatase 2A 65 kDa regulatory subunit A beta isoform	37288835	133360770	37811702	6.94871e+07	26.0502			676435912	5.49193e+09	3.08418e+09	31.5222		1.20833e+09	156084237	3565545820	1.64332e+09	30.614		64156606	8.38456e+06	164820100	7.91204e+07	26.2375		1.34271e+09	30.3225		7.52467e+08		553080955	6.52774e+08	29.282		1240576171	499865814	1945904028	1.22878e+09	30.1946		283926028	286883994		285405011	28.0884
RXN35571.1	A0A498NUJ2	Phosphoglucomutase-1	2699539600	309435900	1.27368e+08	1.04545e+09	29.9615		6.62995e+09	1088746248	6.03494e+09	4.58455e+09	32.0941		1.23492e+09	5.89917e+07	4856361066	2.05009e+09	30.933		190868797	78684312	216548678	162033929	27.2717		444695001	28.7282		295466085	4.46698e+08	130576679	2.90914e+08	28.116		701876177	127789236	844303168	557989527	29.0557		1014658918	8.41418e+08	9.67645e+08	9.41241e+08	29.81		162522235	126527138
RXN24463.1	A0A498MX98	Ceruloplasmin	106543096	113560892	342773596	1.87626e+08	27.4833		579242736		1686980630	1133111683	30.0776		639291855	94854572	2735216219	1.15645e+09	30.1071								4428023398	32.044		96916834	2.72028e+08	43670674	1.37539e+08	27.0353		375678980		1168798949	7.72239e+08	29.5245		3.8455e+10	1020127093	3.83025e+10	2.59259e+10	34.5937		251125452	7020482808
RXN34683.1	A0A498NRY3	Cystatin-B-like protein	243488492	23265536	1037014204	4.34589e+08	28.6951																				85563736	26.3505								2.01193e+08		44223272	1.22708e+08	26.8707
RXN11754.1	A0A498LY23	Spermidine synthase	111367532	16020663	30509554	52632583	25.6495		4.18843e+08	574093519	1355949460	7.82962e+08	29.5444		9.00194e+07	10981327		5.05003e+07	25.5898		4.75845e+07	1.44563e+07	123419178	6.182e+07	25.8816		290288462	28.1129		5.67219e+07	88739952	84813244	7.67584e+07	26.1938		2.07215e+07		33966121	2.73438e+07	24.7047		109683188	9217158	131065984	83322110	26.3122		3.72285e+07	51783660
RXN08278.1	A0A498LIX0	von Willebrand factor A domain-containing 1-like protein	75632068	9582967	440882226	1.75366e+08	27.3858		1.60574e+08		7.22743e+07	1.16424e+08	26.7948		31343383		44256184	3.77998e+07	25.1719		6857519		28192354	1.75249e+07	24.0629		185339242	27.4656		5.51912e+07		367507059	2.11349e+08	27.6551		884355372		606845546	745600459	29.4738			9597171		9597171	23.1942		25542165	317654755
RXN34781.1	A0A498NSF4	Apolipo M	209091300	49863112	530442266	263132226	27.9712		15824105		36945088	2.63846e+07	24.6532										8206537	8206537	22.9683		131369312	26.9691		100850804	18952662	54678724	58160730	25.7935		122016752		5.89131e+07	9.04649e+07	26.4309		1865591027	428015256	1193424763	1162343682	30.1144		17321530	1.93992e+08
RXN02954.1	A0A498MUF4	Ubiquitin carboxyl-terminal hydrolase (EC 3.4.19.12)	404382776	75150914	232158256	2.37231e+08	27.8217		3468491111	1634969701	22407368631	9170276481	33.0943			72313600	336134776	204224188	27.6056		2.98007e+09	2.64542e+09	2.0323e+09	2.5526e+09	31.2493		21063860	24.3283			11994950		11994950	23.5159				162062060	162062060	27.272		110226738	13530246	932757450	352171478	28.3917			343086581
RXN28130.1	A0A498N519	Toll-like receptor 13	77235134	11451081	189338210	9.26748e+07	26.4657																				58660824	25.8059		54848567	53802831	48144930	5.22654e+07	25.6394		26469224		41501244	33985234	25.0184			25802500		25802500	24.621
RXN31469.1	A0A498NI12	Dynein light chain	87242016	86222776	1207951490	460472094	28.7785		5.12277e+08	694513608	501747328	5.69513e+08	29.0852				86542756	86542756	26.3669		1.63815e+08	4.56184e+08	5.48621e+08	3.8954e+08	28.5372		992812676	29.8869		175981670	219511702	1316182448	5.70559e+08	29.0878		1736233708	1.57328e+07	974882908	9.0895e+08	29.7596			5.73298e+07		5.73298e+07	25.7728		166696048	169994612
RXN35550.1	A0A498NTT9	Alcohol dehydrogenase [NADP(+)] isoform X2	145857980	16924200	212686564	125156248	26.8992		347508629	1.93959e+08	1.68588e+09	7.4245e+08	29.4677		68446110			68446110	26.0285		36224731	1.19633e+08	322451473	1.59436e+08	27.2484		5.90778e+08	29.138		314561226	476611085	61633820	2.84269e+08	28.0827		67975357		206037566	1.37006e+08	27.0297		277361892	91415244	1128022318	4.98933e+08	28.8943		7.00791e+08	1.19274e+08
RXN27357.1	A0A498MDK5	Proteasome subunit alpha type (EC 3.4.25.1)	2.88959e+08	7.6231e+07	121622478	1.62271e+08	27.2738		2.44108e+08		578184894	4.11147e+08	28.6151		134896508	173131978	135858824	1.47962e+08	27.1407		2.45411e+08	2.89255e+08	247213790	2.60627e+08	27.9574		146600611	27.1273		5.08247e+08	507126879	6.32621e+08	5.49332e+08	29.0331		428928163	16793338	429150835	291624112	28.1195		480669672	374930144	609209115	4.8827e+08	28.8631		362644348	329963727
RXN26255.1	A0A498NAQ7	Programmed cell death 6-interacting-like isoform X2	22186922	86338153	239119007	1.15881e+08	26.7881		1.70351e+09	268813736	2.68408e+09	1.55213e+09	30.5316		252165017		1934867749	1093516383	30.0263		5.50173e+08	7.27262e+07	3.36569e+08	3.19823e+08	28.2527		1999621476	30.8971		6.66776e+08	7.65023e+08	135438553	5.22413e+08	28.9606		654905598	217637865	5.6392e+08	4.78821e+08	28.8349		711082524	1.84515e+08	829551634	5.7505e+08	29.0991		600592973	1.62838e+08
RXN04440.1	A0A498L7Y3	Peptidylprolyl isomerase (EC 5.2.1.8)	27812840	12146817	24453298	21470985	24.3559		1.89597e+07	1630665	2.68923e+08	9.65044e+07	26.5241														24707776	24.5585		14267230	47040112	118231998	5.98464e+07	25.8348								33444552	11080167	85585543	4.33701e+07	25.3702		20757792
RXN24786.1	A0A498N2P6	Core histone macro	111525311	34839846	530754146	2.25706e+08	27.7499		1.25694e+09	1388688962	5643265554	2.76297e+09	31.3636		300065590	46639885	392517244	246407573	27.8765				25563636	25563636	24.6076		1344375054	30.3243		8.92364e+08	8.49289e+08	1982411400	1241354766	30.2093		741872039	22587704	586509915	4.50323e+08	28.7464		1.27755e+08	396349498	1239093817	5.87733e+08	29.1306		1.21397e+09	5.62753e+08
RXN28512.1	A0A498N9P4	T-complex 1 subunit zeta	19649348	40113297	267419262	1.09061e+08	26.7006		1418226694	262337644	2.19129e+09	1.29062e+09	30.2654		659548283	4.07792e+07	1672796457	7.91041e+08	29.5592		1564919730	1215192310	2.17011e+09	1.65007e+09	30.6199		833401944	29.6344		416723786	4.44095e+08	138311424	3.33043e+08	28.3111		329302170		332094970	330698570	28.3009		339964124	366407824	515382304	4.07251e+08	28.6013		5.1049e+08	4.64485e+08
RXN29469.1	A0A498N520	Methylthioribose-1-phosphate isomerase (M1Pi) (MTR-1-P isomerase) (EC 5.3.1.23) (S-methyl-5-thioribose-1-phosphate isomerase) (Translation initiation factor eIF-2B subunit alpha/beta/delta-like protein)	83159156	1.36549e+08	51008160	9.02389e+07	26.4272		1.26111e+09	488137413	2341984599	1.36374e+09	30.3449		71609320		190894136	131251728	26.9678		23270525	1.44392e+07	102809925	4.68399e+07	25.4812		4.12413e+08	28.6195		134170277	2.83127e+08	39194475	1.52164e+08	27.1811		199157356		162397844	180777600	27.4296		207431614	296060778	8.48427e+08	4.5064e+08	28.7474		2.38202e+08	113498243
RXN27114.1	A0A498N600	Dipeptidyl peptidase 3 (EC 3.4.14.4) (Dipeptidyl aminopeptidase III) (Dipeptidyl peptidase III)	1.91925e+07	20607288		1.98999e+07	24.2463		687124052	8457391	3.14963e+08	3.36848e+08	28.3275		294282416	30786924	909165575	4.11412e+08	28.616		5.26794e+07		2.1002e+07	3.68407e+07	25.1348		685952028	29.3535		1.22518e+08	194634849	54058465	1.23737e+08	26.8827		613160880	301848265	391964857	4.35658e+08	28.6986		108375192	18627012	347887090	1.58296e+08	27.2381		229435329	5.08743e+07
RXN32399.1	A0A498NKS6	Glutathione S-transferase theta-1-like protein	100111964	570064544	755145004	4.75107e+08	28.8237		2.15112e+08	245278202	491543272	3.17311e+08	28.2413								9.87894e+07	38070211	8.06869e+07	7.25155e+07	26.1118		445224840	28.73		224368218	295962922	168014162	229448434	27.7736		1705009008	11188421	699115620	8.05104e+08	29.5846		23020000	79835669	30910438	4.45887e+07	25.4102		1.05759e+09	97464033
RXN06257.1	A0A498LKV8	Superoxide dismutase (EC 1.15.1.1)	379302297	364714656	640560896	4.61526e+08	28.7818		518722983	1460863316	955630091	9.78405e+08	29.8659		111572128	2.89791e+08	284646804	2.2867e+08	27.7687		467895733	1520974156	265938181	751602690	29.4854		994868288	29.8899		531011488	319118272	543898822	464676194	28.7917		1172153114	847814180	1088070997	1.03601e+09	29.9484		139483168	6.12911e+09	251034262	2.17321e+09	31.0172		3.38926e+09	154072144
RXN08514.1	A0A498LP17	WD repeat-containing 6	59366782	75073661	149190372	94543605	26.4945		1.68475e+09	794414572	2326704109	1.60196e+09	30.5772		136748984		557907436	347328210	28.3717		111936987	5.45469e+07	341433912	1.69306e+08	27.3351		496506796	28.8872		28256111	2.09795e+08	68522257	1.02191e+08	26.6067		908770100	6.61793e+06	1093226881	6.69538e+08	29.3186		3.46887e+08	144016562	437937442	3.09614e+08	28.2059		411944408	1.22559e+08
RXN07058.1	A0A498LFH6	Transcriptional activator Pur-beta	209238693	8996801	248615362	155616952	27.2134		400139246	808492460	1.31121e+09	8.39948e+08	29.6457		163674758	85465882	68321573	1.05821e+08	26.657		5.75948e+07	3.9895e+07	222635128	1.06708e+08	26.6691		115712432	26.786		174721300	75771480	1.72885e+08	1.41126e+08	27.0724								1155106909	306747245	1764194961	1075349705	30.0022		1.89013e+08	24080034
RXN26181.1	A0A498N072	Electron transfer flavo subunit mitochondrial	179672820	84586946	178995368	1.47752e+08	27.1386		846392016	292824800	1.87419e+09	1.00447e+09	29.9038		294217099	88755599	309543508	2.30839e+08	27.7823		1.39561e+09	9.92919e+08	2196116294	1.52822e+09	30.5092		1570561416	30.5486		217951910	452311498	310407408	326890272	28.2842		284644548		4.25312e+08	3.54978e+08	28.4032		494051476	3.28592e+09	916932811	1.56563e+09	30.5441		1.22852e+09	311233635
RXN29793.1	A0A498NBD8	60S ribosomal L13a	1.9901e+08	68150861	790028172	3.52396e+08	28.3926		319325269	65698638	1.60647e+09	6.6383e+08	29.3062								2062720500	2.32692e+09	1.70814e+09	2.03259e+09	30.9207		13468973	23.6831		4.99965e+08	528277714	4.59797e+08	4.96013e+08	28.8858		64440068	301651848	1129437865	498509927	28.893		17692832		619989606	318841219	28.2483		1.17963e+08	283314266
RXN12914.1	A0A498M1G4	Bis(5-nucleosyl)-tetraphosphatase [asymmetrical]-like protein	200404380	33428763	290207464	1.7468e+08	27.3801																				87671488	26.3856		11970127	14410277	9787237	1.20559e+07	23.5232														4.17531e+07	4774626
RXN18222.1	A0A498MFT6	Synemin-like protein	154894389	28390770	4.86968e+08	2.23418e+08	27.7352		158445039		8.66023e+07	1.22524e+08	26.8685		2699310172		135774100	1417542136	30.4007								23898858	24.5104								60835196		135818865	9.8327e+07	26.5511		1.38529e+08	2.49697e+09	2.50117e+08	9.61873e+08	29.8413			200676620
RXN10203.1	A0A498LR94	40S ribosomal S23	572754166	82060928	1544726328	733180474	29.4496		134538835	296949284	530316274	3.20601e+08	28.2562								4.40951e+08	789021020	4.96014e+08	5.75329e+08	29.0998		593935644	29.1457		4.44823e+08	467273172	4.93544e+08	4.68547e+08	28.8036		1228289068		2.90587e+08	7.59438e+08	29.5004		90920968	2.3289e+07	91116118	6.8442e+07	26.0284		384844694	3.32645e+08
RXN02596.1	A0A498L707	60S ribosomal protein L27	1250040936	577315738	2.83389e+09	1.55375e+09	30.5331		757836131	209222148	2038653116	1.0019e+09	29.9001			10257468		10257468	23.2902		2.64249e+09	2.63958e+09	1645718530	2.30926e+09	31.1048		450462624	28.7468		667376464	1273912075	2.00564e+09	1.31564e+09	30.2931		326404948	47378708	45615342	139799666	27.0588		874586488	13090044	6.59263e+08	5.15647e+08	28.9418		1.11025e+09	570912807
RXN26881.1	A0A498N295	Heat shock beta-7	385676768	51293152	7.19325e+08	3.85431e+08	28.5219																				13155964	23.6492		7420313		7734721	7577517	22.8533								37361262	856575296	63764086	319233548	28.25
RXN30087.1	A0A498NBZ7	Histone H2A	193384880	672746256	1665374984	8.43835e+08	29.6524		62634932	14443439	278396018	118491463	26.8202				214550372	214550372	27.6767		6887853			6887853	22.7156		1883920464	30.8111			2916361408		2916361408	31.4415		24433193672		956366845	1.26948e+10	33.5635			101090304	2359903232	1230496768	30.1966		149879560	15138777426
RXN31926.1	A0A498NJE4	UPF0160 mitochondrial	64481354	24876964	132259684	7.38727e+07	26.1385		279188805	105483150	7.00811e+08	3.61828e+08	28.4307		55245136			55245136	25.7193		1.83118e+08	74394884	363840176	2.07118e+08	27.6259		310931706	28.212		155585035	242075277	48702408	1.48788e+08	27.1487		206456164		264749414	235602789	27.8118		19839386	63456628	28137135	37144383	25.1466		264637238	63825261
RXN20080.1	A0A498MIU3	Mesencephalic astrocyte-derived neurotrophic factor	156359326	29687343	134577164	106874611	26.6713														2.55318e+06	2.23121e+07		12432615	23.5676		126204900	26.9112		302067786	33179086	243514768	1.92921e+08	27.5234		111983296	43844196	70795530	7.5541e+07	26.1708								279120
RXN28301.1	A0A498N651	Neutral and basic amino acid transport rBAT	32511009	34274835	48364880	3.83836e+07	25.194		2.01934e+08		1092349688	6.47142e+08	29.2695				46819856	46819856	25.4806		6.58325e+06		38126319	2.23548e+07	24.4141		75472008	26.1694			17369206	2.68567e+07	2.2113e+07	24.3984		36777144		47662614	42219879	25.3314		383545474	326831423	8.66788e+08	5.25722e+08	28.9697		35656276
RXN17403.1	A0A498MC52	60S ribosomal L31	876569782	138744096	2180778872	1065364250	29.9887		312478104		1.00883e+09	6.60655e+08	29.2993		21650484			21650484	24.3679		1.69032e+09	2036928390	1426673154	1.71797e+09	30.6781		370378992	28.4644		713202309	731436064	1343687456	929441943	29.7918		958747320	13422733	449899650	4.74023e+08	28.8204		625821802	63218360	5.70594e+08	4.19878e+08	28.6454		423918414	720776944
RXN21362.1	A0A498MNZ5	AMBP	241942440	32719370	374177872	216279894	27.6883				17924623	17924623	24.0954		47057272		225251582	136154427	27.0207								51433350	25.6162		30391906	5.92751e+07		4.48335e+07	25.4181		193382360	28605358	107127523	1.09705e+08	26.7091		1957814603	172086680	1657838500	1.26258e+09	30.2337		1.59137e+09	615646593
RXN12678.1	A0A498LW12	Nuclease-sensitive element-binding 1-like isoform X1	1.69365e+07	2.02896e+07	6223724	14483252	23.7879		53934467	7224542	4.54615e+07	3.55402e+07	25.0829		155642729		102096807	128869768	26.9413		1.84464e+09	537043638	1.2495e+09	1.2104e+09	30.1728		31074074	24.8892		205536249			205536249	27.6148		384378556			384378556	28.518		197527204		199135457	1.98331e+08	27.5633			33224703
RXN19083.1	A0A498MGW9	Pyruvate kinase (EC 2.7.1.40)	403988744	832050496	1169564343	801867861	29.5788		9147761704	3235453630	5965390790	6.1162e+09	32.51		6.43212e+09	1377592500		3.90485e+09	31.8626			30016772	2.90083e+08	1.6005e+08	27.2539		1744849272	30.7005		3769515869	1774851679	8.92976e+08	2.14578e+09	30.9989		2288674329	142617293	2.6176e+09	1.68297e+09	30.6484		3432065881	6.93473e+09	2.16819e+09	4.17833e+09	31.9603		907552594	5.77777e+08
RXN27493.1	A0A498LIC0	Complement C1q tumor necrosis factor-related 5	172604532	205038000	1037635664	4.71759e+08	28.8135
RXN26946.1	A0A498N8N2	60S ribosomal L17	187225728	494732860	1649734528	7.77231e+08	29.5338		553961318	16620625	1.57187e+09	7.14149e+08	29.4117								4.07866e+09	2848625987	2500824857	3.1427e+09	31.5494		338084212	28.3328		573823374	1512365628	1233574107	1106587703	30.0435		239502200		363244218	301373209	28.167		190110024	681578315	629700300	5.00463e+08	28.8987		7.45022e+08	4.24227e+08
RXN26879.1	A0A498MXX3	Pleckstrin homology domain-containing family M member 2-like isoform X2	30173046	224949479	233400710	1.62841e+08	27.2789		4.08693e+08	1.65786e+08	7.1213e+08	4.2887e+08	28.676		213594972		733717048	473656010	28.8193		1222733685	3.77459e+08	2.19671e+09	1.26564e+09	30.2372		2285338308	31.0898		8.0857e+08	1.17339e+09	1087187821	1.02305e+09	29.9302		503046565	2.63509e+08	356120654	3.74225e+08	28.4793		120847624	283945286	293122643	2.32639e+08	27.7935		1.1432e+09	513356207
RXN11827.1	A0A498M3F5	Receptor expression-enhancing protein	153708388	269893866	150459932	191354062	27.5117		1461373420	949099810	2.7471e+09	1.71919e+09	30.6791				33495316	33495316	24.9975		120668182	20402488	30842164	57304278	25.7721		436446060	28.7012		367250224	335253753	177114501	2.93206e+08	28.1273		866885134	825955604	158407110	617082616	29.2009		9.62759e+07	205498675	2.528e+08	184858142	27.4618		1.02559e+08	131257932
RXN29148.1	A0A498N4U5	Nap-like protein	172800608	49500500	483160624	2.35154e+08	27.809		142428048		713925616	428176832	28.6736								75601735	1.6839e+08	9.44062e+07	112799371	26.7492		101359312	26.5949		128927468	154776484	360188536	2.14631e+08	27.6773		203935284	76795216	204076200	1.61602e+08	27.2679			1568333552	326189486	947261519	29.8192		517601557	37489668
RXN29702.1	A0A498NC84	Dynactin subunit 1-like isoform X1		14618921	42892376	2.87556e+07	24.7773		7.51666e+07		1.21984e+08	9.85753e+07	26.5547				174734250	174734250	27.3806		6.34022e+07		126353746	9.4878e+07	26.4996		124947675	26.8967		73998112		56495952	65247032	25.9594		61865360		45970848	53918104	25.6843		4.28711e+07	2.12561e+07	2.10369e+07	2.8388e+07	24.7588			2.08366e+07
RXN12491.1	A0A498LWA9	Cytoplasmic dynein 1 light intermediate chain 2-like isoform X1	17351554	66187726	102833471	6.21243e+07	25.8887		2.809e+08	53191214	209088476	1.8106e+08	27.4319		9758573		40847139	25302856	24.5928		68126473	19908412	1.46101e+08	7.80453e+07	26.2178		144761500	27.1091		33388796			33388796	24.9929				33560824	33560824	25.0003				27069901	27069901	24.6902		37794924	882870377
RXN20009.1	A0A498MFL6	Carboxypeptidase Z-like isoform X1	75108412	116412701	1.96196e+08	1.29239e+08	26.9455								21986020		154828254	88407137	26.3977								10157385	23.276		9489377		3.28061e+06	6.38499e+06	22.6063
RXN31849.1	A0A498NJ90	26S proteasome non-ATPase regulatory subunit 7	1.9944e+07	1.81323e+07	43581568	2.72193e+07	24.6981		3.13871e+08	58045443	1006585859	4.59501e+08	28.7755		59669180		251785004	155727092	27.2144		6.55084e+08	1.61448e+08	1113505863	6.43346e+08	29.261		381632103	28.5076		207076449	349214844	1.56281e+08	2.37524e+08	27.8235		362205787	31963998	31450388	141873391	27.08		543976576	209373756	910104075	5.54485e+08	29.0466		281016234	3.21618e+07
RXN23019.1	A0A498MNF1	Eukaryotic initiation factor 4A-III	2492079	4.00816e+06	3.0602e+06	3186813	21.6037		186992968		300093272	243543120	27.8596		7529679		2.82152e+08	1.44841e+08	27.1099		7.28896e+06	3.05531e+06	19527687	9.95732e+06	23.2473		1.58996e+08	27.2444		2.09671e+08	286464164	1.93307e+08	2.29814e+08	27.7759		227572413		417497527	322534970	28.2649		184739918	40866558	6.93296e+08	3.06301e+08	28.1904		640643239	1.31721e+08
RXN05702.1	A0A498LBV9	Solute carrier family facilitated glucose transporter member 2	40220078	34531328	12174014	28975140	24.7883			79660242	5161382	42410812	25.3379			1.54965e+06		1.54965e+06	20.5635		3.28537e+07	76684908	11778061	4.04389e+07	25.2692		41949466	25.3221		112573430	110601346	51684427	9.16197e+07	26.4492		625893688	589960160	28630660	4.14828e+08	28.6279			12953964		12953964	23.6269		67929698	1.32291e+08
RXN09375.1	A0A498LVN4	Nidogen-1	133867880	140255391	222570786	1.65565e+08	27.3028		159413955		360029003	259721479	27.9524		258574093	46183656	641236490	315331413	28.2323		2.85669e+07	1.64699e+07	43407488	2.94815e+07	24.8133		3.92961e+08	28.5498		130998159	550829779	241696144	3.07841e+08	28.1976		316395444	35208124	5.78671e+08	3.10092e+08	28.2081		60410484	8.78191e+07	160542839	1.02924e+08	26.617		159674820	258168865
RXN03737.1	A0A498NEC0	Hyaluronan-binding 2-like protein	44063892	385042594	24175276	1.51094e+08	27.1709		509111679		2095170271	1302140975	30.2782		732366815	405427468	1864149461	1.00065e+09	29.8983								1556419936	30.5356		210757099	685010602	192992861	3.6292e+08	28.4351		4.93066e+07		100295177	7.48009e+07	26.1566		11269671088	1279788151	16233359960	9.59427e+09	33.1595		375929445	3041317260
RXN17210.1	A0A498MA61	Mitochondrial carnitine acylcarnitine carrier	33490928	12810652	32919904	2.64072e+07	24.6544		75124433		102901084	8.90128e+07	26.4075								2.88483e+07		24987002	2.69177e+07	24.682		343994779	28.3578		62269852	2.65829e+07	2.51519e+08	1.13457e+08	26.7576		178459860	116492447	363103324	219351877	27.7087		27585374	157560176	202563330	1.29236e+08	26.9454		2.87769e+08
RXN29084.1	A0A498NBA5	NADH dehydrogenase [ubiquinone] 1 alpha subcomplex subunit 10, mitochondrial	24739460	4962586		14851023	23.8241		2143640637	1445422244	6.94296e+09	3.51067e+09	31.7091		176302126	19495820	144578240	1.13459e+08	26.7576		3968519938	776434972	8714157183	4.48637e+09	32.0629		285264750	28.0877		122746136	170107810	435124430	2.42659e+08	27.8544		238654616	67674664	1122835210	4.76388e+08	28.8276		405676108	3.16957e+09	1562332903	1.71253e+09	30.6735		946640813	46017692
RXN30599.1	A0A498N845	Smoothelin isoform X1	404032058	161451571	438247770	334577133	28.3178																				34399962	25.0359																					7.48856e+06
RXN31012.1	A0A498NGN3	60S ribosomal L28	767244616	74315880	1955283364	9.32281e+08	29.7962		340904345		790205712	5.65555e+08	29.0751								1.63826e+09	9.61656e+08	1110954944	1.23696e+09	30.2041		12709368	23.5994		562449443	4.2365e+08	920535480	6.35545e+08	29.2434		407486955		415477354	4.11482e+08	28.6163		444013800	72339466	3.53397e+08	2.89917e+08	28.1111		77559816	118748771
RXN10269.1	A0A498LPF0	Protein S100-A1-like	79596568	1108599048	988705920	7.25634e+08	29.4347								87149420		268933304	178041362	27.4076								341350600	28.3467		88460875	310115730	3.71969e+08	2.56849e+08	27.9363				277274536	277274536	28.0467			123725362		123725362	26.8826		68490044	1.15409e+09
RXN06332.1	A0A498LDT5	EMILIN-1-like protein	51253966	2303388059	1331933218	1.22886e+09	30.1947										51109169	51109169	25.6071		4.9468e+06		14524555	9.73568e+06	23.2149		150748770	27.1676				12679762	12679762	23.596		48669124	4.87756e+06	322181099	1.25243e+08	26.9002			1.72583e+08		1.72583e+08	27.3627		259952065	803314257
RXN21487.1	A0A498MXY4	Serpin H1-like protein	26845381	6024504	135972630	5.62808e+07	25.7461																7965009	7965009	22.9252							13437157	13437157	23.6797									12085374	4455114	8270244	22.9795			13845589
RXN05743.1	A0A498LE76	Carbonic anhydrase-like protein	480130274	1380668238	749516932	870105148	29.6966		7334469653	8865596448	3.10365e+10	1.57455e+10	33.8742		1664953884	3106924468	2405014884	2.3923e+09	31.1557		1.74958e+07	69953323	22199493	3.65495e+07	25.1234		1937851338	30.8518		4340843625	12028585950	5186503154	7.18531e+09	32.7424		334439088	119966116	271915628	242106944	27.8511		172656476685	23711934369	166714447705	1.21028e+11	36.8165		9.02664e+09	5004152193
RXN05122.1	A0A498LA69	CD81 antigen	1162672256	415179568	252811896	610221240	29.1848		1248667646	330832016	1172453148	9.17318e+08	29.7728		15295313			15295313	23.8666								326103576	28.2808		511270460	182571124	386669234	3.6017e+08	28.4241		1762529844	243429512	753275148	9.19745e+08	29.7767		17043372	704481300	48951100	2.56825e+08	27.9362		365024570	244084608
RXN09954.1	A0A498LT55	ELAV 1 isoform X1	255624680	121810639	97687508	1.58374e+08	27.2388		67822286		459404777	2.63614e+08	27.9738		319326784	53457716		186392250	27.4738		101226097	1.04603e+08	6.52041e+08	285956716	28.0912		745818842	29.4743		819617036	343240109	133701099	4.32186e+08	28.6871		390439242		120218520	255328881	27.9278		164313484	78197652	1722599373	6.55037e+08	29.287		1.82282e+08	252747970
RXN03876.1	A0A498LAH2	Dihydrolipoyl dehydrogenase (EC 1.8.1.4)	62089336	112256244	264543358	1.46296e+08	27.1243		6.10848e+09	187798642	7.83489e+09	4.71039e+09	32.1332		1353395158	52533979	3879914154	1.76195e+09	30.7145		1842063700	2.13139e+09	2.5629e+09	2.17879e+09	31.0209		922544818	29.781		6.886e+08	8.31047e+08	493218327	6.70955e+08	29.3216		1281193901	2.38595e+08	1575026579	1.03161e+09	29.9422		1218818220	9119341667	2.49891e+09	4.27902e+09	31.9946		3.47452e+09	3.45006e+08
RXN16758.1	A0A498M765	40S ribosomal protein S7	518962334	78444540	5673947880	2.09045e+09	30.9612		4.80024e+08	11959471	1139448553	5.43811e+08	29.0185				244251881	244251881	27.8638		1.96697e+09	3.25028e+09	1149172140	2.12214e+09	30.9829		712209764	29.4077		1.41305e+09	2378869891	1.24438e+09	1.67877e+09	30.6448		1555052888		364645572	959849230	29.8382		302443412	437794676	1269032083	6.69757e+08	29.3191		2.26921e+08	806834853
RXN18260.1	A0A498MDH5	Alanine--tRNA cytoplasmic isoform X1	20832200	109512214	907521640	3.45955e+08	28.366		3.50174e+09	696960705	6.43268e+09	3.54379e+09	31.7226		140052170	45039940	861867132	348986414	28.3786		2.01395e+08	8.07199e+07	2.69043e+08	183719466	27.4529		894914960	29.7372		178844070	377553569	47366445	2.01255e+08	27.5844		421762716	67110872	748000077	4.12291e+08	28.6191		951366021	8.31348e+06	1183298809	7.14326e+08	29.412		491000663	1.03096e+08
RXN07918.1	A0A498LHW4	Betaine--homocysteine S-methyltransferase 1	136742128	1952619670	473273834	8.54212e+08	29.67		7.42553e+08	482707967	1.25698e+09	8.27414e+08	29.624		113320534		409972884	261646709	27.963		5.16784e+06	8.24433e+07	21113708	3.62416e+07	25.1111		5.22665e+09	32.2832		3.27528e+08	755782944	220807612	4.34706e+08	28.6955		1251858459		1090701573	1171280016	30.1254		40386992	139840753	108332345	9.61867e+07	26.5193		4.07909e+09	1119039529
RXN10591.1	A0A498LR71	Fibulin-5-like isoform X1	89278457	435438531	191967596	2.38895e+08	27.8318															4.67392e+06		4.67392e+06	22.1562							73313176	73313176	26.1276				29589010	29589010	24.8186			4582691040	5726028	2294208534	31.0953			793361992
RXN02684.1	A0A498L8B5	60S ribosomal l10	83164116	117554620	645663428	282127388	28.0718		1071328031	273492302	2.23163e+09	1.19215e+09	30.1509		68131504		82376294	75253899	26.1653		2500083512	1405905515	1.74019e+09	1.88206e+09	30.8097					9.116e+08	5.52421e+08	873927574	7.79316e+08	29.5376		44924424	15767901	605239023	221977116	27.7258		1.3624e+08	103771454	650928371	2.9698e+08	28.1458		324996595	4.20593e+08
RXN07281.1	A0A498LGL1	Rho-related GTP-binding-like protein		39056402	161187748	100122075	26.5772		8.09491e+06		16078339	1.20866e+07	23.5269														49795133	25.5695		3.25125e+08	1.8598e+08	247210062	2.52772e+08	27.9133		79321164		67285248	73303206	26.1274		176670968	9.20999e+06	191553361	1.25811e+08	26.9067		208395800	57452022
RXN35246.1	A0A498NU90	Peptidyl-prolyl cis-trans isomerase (EC 5.2.1.8)	93205512	41424555	145109582	9.32465e+07	26.4745														1.30137e+06	2.75203e+06		2.0267e+06	20.9507		96578644	26.5252		38295587		64433702	5.13646e+07	25.6143				52926439	52926439	25.6575			1.60619e+07		1.60619e+07	23.9371			2.92931e+06
RXN03745.1	A0A498LEG1	Thioredoxin-dependent peroxide mitochondrial	179135115	472944086	955746184	535941795	28.9975		5.47895e+09	1955225916	8.08955e+09	5.17458e+09	32.2688		351352460	4.33266e+08	1815356602	8.66658e+08	29.6909		3328960747	4361853236	2.66846e+09	3.45309e+09	31.6852		1999697748	30.8971		801007960	561089759	1.16411e+09	8.4207e+08	29.6494		1.62092e+09	310816026	2047602418	1.32645e+09	30.3049		928941920	4169961458	3586656620	2895186666	31.431		2180200467	221363899
RXN12550.1	A0A498LWI4	Macrophage migration inhibitory factor	268108292	198995415	1159580606	5.42228e+08	29.0143		38047262	638051320	31192944	235763842	27.8128			27416134	105433296	66424715	25.9852								4045117960	31.9135		321038572	331116926	143070688	2.65075e+08	27.9818		141429872		1238741585	6.90086e+08	29.3622			119630442	7746134	63688288	25.9245		573433459	399539742
RXN24617.1	A0A498N7M2	Ras-related Rab-27B	5.08444e+06	27711138	155146925	6.26475e+07	25.9008		2.59988e+07	73310080	5.25764e+07	5.06284e+07	25.5934
RXN18128.1	A0A498MAL2	Lambda-crystallin-like protein	10027141	31136888	40678306	2.72808e+07	24.7014		2.5911e+08	550111721	1215950354	6.75057e+08	29.3304		339750368		122309164	231029766	27.7835		6.12731e+06	6226037	3.13924e+07	1.45819e+07	23.7977		495117088	28.8832		3.32257e+06			3.32257e+06	21.6639		535132767	15134413	142579288	2.30949e+08	27.783		129957464		276437872	203197668	27.5983		1535215361	66906744
RXN18212.1	A0A498MFS6	Aspartate aminotransferase (EC 2.6.1.1)	156388693	94839336	615685974	2.88971e+08	28.1064		5434653671	2537035586	1.71443e+10	8.372e+09	32.9629		2289932732	243360979	4944904612	2.49273e+09	31.2151		764453060	3.5682e+08	2517436987	1.2129e+09	30.1758		2030668506	30.9193		1556659607	2.66522e+09	1.23712e+09	1819667770	30.761		4122365431	234086887	5867715714	3.40806e+09	31.6663		5991403846	1.88251e+10	1.60578e+10	13624753916	33.6655		8.53898e+09	6.6378e+08
RXN25577.1	A0A498NA38	NOXP20-like isoform X1	7.07649e+06		2.95105e+06	5.01377e+06	22.2575		1.77028e+07		7634240	1.26685e+07	23.5947				34553292	34553292	25.0423								18405524	24.1336			5211740		5211740	22.3133
RXN16195.1	A0A498MFD2	Supervillin-like isoform X2	23523578	5861750		14692664	23.8086														2.40531e+06			2.40531e+06	21.1978
RXN27813.1	A0A498MUH8	Enoyl-mitochondrial	333962496	116751193	149274404	199996031	27.5754		1831321003	2.92948e+09	5.50607e+09	3.42229e+09	31.6723			242037622	90794936	166416279	27.3102		5.41079e+08	1.58703e+09	521052107	8.83052e+08	29.7179		1084583280	30.0145		4.37577e+08	3.20834e+08	3.9096e+08	3.83124e+08	28.5132		304941054	13723931	370317056	2.29661e+08	27.7749		337644794	4823907198	1224127040	2.12856e+09	30.9872		2.06506e+09	161873150
RXN27789.1	A0A498N0I6	Hexokinase-1	33546668	32087930		32817299	24.968		3.05967e+10	3.68353e+09	3.36494e+10	2.26432e+10	34.3984		945933009	384065214	4794479160	2041492461	30.927								533906988	28.992		383956682	312427332	3.03168e+08	3.33184e+08	28.3117		206982500	39829101	517614401	2.54809e+08	27.9248		2.68285e+09	3504134496	8349087735	4.84536e+09	32.174		4.46158e+08	1.8648e+08
RXN11529.1	A0A498LSY1	Glutamine synthetase (EC 6.3.1.2)	133429088	66139747	234510312	144693049	27.1084		38455930	187814672	100240876	1.08837e+08	26.6976														261447884	27.9619																				19053364
RXN22340.1	A0A498MPS1	Succinyl-ligase [GDP-forming] subunit mitochondrial	6116587	18058734	10362742	1.15127e+07	23.4567		209017068	112425943	7.55162e+08	3.58868e+08	28.4189				47005066	47005066	25.4863		44590993	4.32816e+06	1.74618e+07	22126982	24.3993		715063766	29.4135			112373547	7.35457e+06	5.98641e+07	25.8352		6.12987e+08	26049160	264038676	3.01025e+08	28.1653		445290644	1007623914	7.20949e+08	7.24621e+08	29.4327		1.44669e+09	44446238
RXN32273.1	A0A498NK70	Transmembrane emp24 domain-containing 10	214996944	231926277	629488664	3.58804e+08	28.4186		3.24517e+08		481673615	4.03095e+08	28.5865				75553688	75553688	26.171		202225736	1.16636e+07	5.99088e+07	9.12661e+07	26.4436		307197441	28.1946		362494845	3.38462e+08	989777545	5.63578e+08	29.07		536258696	373792832	873087297	5.9438e+08	29.1468		138496508	16046334	538240154	2.30928e+08	27.7829		17340895	69197440
RXN29097.1	A0A498NEX9	Translin	271353380	3.45544e+06	74786072	1.16532e+08	26.7961		63902126	22675750	170329975	8.5636e+07	26.3517								21065609	15941609	2.45763e+07	2.05278e+07	24.2911		217743796	27.6981		1.18005e+07	8.23449e+07	95091470	6.30789e+07	25.9107		123165912	9913316		66539614	25.9877			5.86456e+07	13406153	3.60259e+07	25.1025		5.02789e+07	16199909
RXN27103.1	A0A498N4H0	Peptidylprolyl isomerase (EC 5.2.1.8)	135004912	266179624	339058204	246747580	27.8785			712760870		712760870	29.4088									5834803	4941387	5388095	22.3613		4244394618	31.9829		1.69249e+08	1.30865e+08	28398096	1.09504e+08	26.7064		210431900		21821384	116126642	26.7911								324014664	57828840
RXN23865.1	A0A498N4P6	Reticulon	8.12666e+06	45606167		2.68664e+07	24.6793		2800691097	951392406	3.15678e+09	2.30295e+09	31.1008		24781010	39403720	2.53398e+08	1.05861e+08	26.6576		7.62178e+08	2.14572e+08	1319869400	7.6554e+08	29.5119		810420218	29.5941		701616502	493525870	932274023	7.09139e+08	29.4015		635213074	581909168	486122956	5.67748e+08	29.0807		340265302	836142940	555758280	5.77389e+08	29.105		611566959	3.14401e+07
RXN18113.1	A0A498MEA4	LIM domain only 7-like isoform X7	185398128	70456624	348944736	2.016e+08	27.5869		691012965	259457238	1.26173e+09	7.37401e+08	29.4579			55794234	54797744	55295989	25.7207		1.81592e+08	185280836	267493880	2.11456e+08	27.6558		110338195	26.7174		141583784	175167891	163615018	160122231	27.2546		247033202		199872432	223452817	27.7354		282287584	291522867	407280860	327030437	28.2848		8.19999e+07	23436460
RXN25560.1	A0A498MXQ4	60S ribosomal L9	227641868	427542714	2181385696	945523426	29.8165		527206000	1.72975e+08	7.88567e+08	496249406	28.8865			12297127	25497798	1.88975e+07	24.1717		1.98897e+09	1.34071e+09	1.42715e+09	1.58561e+09	30.5624		7.63121e+08	29.5073		319661775	401003961	280661230	3.33776e+08	28.3143		545706128		430982636	488344382	28.8633		159099669	240414046	515837154	3.05117e+08	28.1848		512249025	261148292
RXN02485.1	A0A498LAX0	Poly(RC)-binding 2	59837362	6.19895e+06	70940142	4.56588e+07	25.4444		7933957	205165974	8.80197e+07	1.00373e+08	26.5808		62372602	15251259		3.88119e+07	25.21		93089944	5.68808e+06	2.07146e+08	1.01975e+08	26.6036		103731928	26.6283		171204488	1.31155e+08	110605462	1.37655e+08	27.0365		1936285034			1936285034	30.8506			17548644	15906522	16727583	23.9957		33353614	76344712
RXN11171.1	A0A498LBR0	Sex hormone-binding globulin-like protein	61557524	143931391	198871404	134786773	27.0061		214584055		8.55055e+08	5.3482e+08	28.9945		186105794	59950028	1396826374	5.47627e+08	29.0286								134488941	27.0029		85223484	281759438	41089565	1.36024e+08	27.0193				70401003	70401003	26.0691		12769823872	1041367095	8351942285	7387711084	32.7825		207283142	3169911336
RXN33673.1	A0A498NP50	Reticulocalbin-1-like isoform X1	3.41506e+07	134784824	461816160	2.10251e+08	27.6475										60245580	60245580	25.8444			7.96209e+06		7.96209e+06	22.9247						15874167		15874167	23.9202		70020672			70020672	26.0613									45242128
RXN26480.1	A0A498N076	Beta-hexosaminidase (EC 3.2.1.52)	40698762	6.52507e+06	131979026	5.97343e+07	25.8321		264673597	26802318	256576854	1.82684e+08	27.4448				568812892	568812892	29.0834			3.00593e+07	11361682	2.07105e+07	24.3039					409558147	809240429	147918989	4.55573e+08	28.7631				742337952	742337952	29.4675			240869874		240869874	27.8437			898338697
RXN34935.1	A0A498NSH4	Elongation factor 1-delta isoform X1	371416112	60894748	534079198	3.2213e+08	28.2631		1.67049e+08	7.95632e+07	251818484	166143681	27.3079		62081904	46091008		54086456	25.6888		15693138	279181359	140994284	1.4529e+08	27.1144		1008797382	29.91		87785913	2.66134e+08	119269908	1.5773e+08	27.2329				287337438	287337438	28.0982			223754970		223754970	27.7373		2.98175e+08
RXN38992.1	A0A498P2W9	Myosin-6	216538712	72061399	171302560	1.53301e+08	27.1918		6400711308	43809884	293713918	2246078370	31.0648		1660522564	1660000540	6096315204	3.13895e+09	31.5476								1386820745	30.3691		7.64911e+09	2.85378e+09	8655090588	6.38599e+09	32.5723		3.47171e+07	381451824	2347513112	9.21227e+08	29.779		50137374	1.24586e+11	116527285	4.15841e+10	35.2753		462001125
RXN16129.1	A0A498LAK0	Fascin	3.34918e+07	59767187	100257222	6.45054e+07	25.9429		6.20291e+09	8.69622e+08	8.73353e+09	5.26869e+09	32.2948		608464300	21539126	1460979713	6.96994e+08	29.3766		1.46139e+07	7.97719e+07	40037916	4.48079e+07	25.4173		53590566	25.6755		209798554	216889501	1.97598e+08	2.08095e+08	27.6327		149383391		79603410	1.14493e+08	26.7707		162739280		789520800	476130040	28.8268		50568989	1010172887
RXN02707.1	A0A498LA40	NSFL1 cofactor p47-like protein	27466832	22801242	59353079	3.65404e+07	25.123		3.56533e+08	364662890	9.21309e+08	5.47501e+08	29.0283		447500525		1155337864	8.01419e+08	29.578		130144923	2.8416e+08	367175264	2.60493e+08	27.9567		893873612	29.7355		1.06283e+08	297397806	201555960	2.01746e+08	27.588								317070878	8.86726e+07	383136276	2.6296e+08	27.9703		152321373	182153844
RXN29966.1	A0A498NE69	Potassium voltage-gated channel subfamily C member 1-like isoform X2	81709544	18568614	106193576	6.88239e+07	26.0364		58621860		169729063	1.14175e+08	26.7667		18960416			18960416	24.1765								7.10377e+07	26.0821		2541949	11229340		6.88564e+06	22.7152		51625806		20803432	36214619	25.1101		1661362058	83283992	2956837894	1.56716e+09	30.5455		15010253	278583754
RXN38563.1	A0A498P2X7	Aminopeptidase (EC 3.4.11.-)	24089426	60204855	34350784	39548355	25.2371		7800049			7800049	22.8951		66737584		366845250	216791417	27.6917											55270561	26641707	4.14036e+07	4.11053e+07	25.2928															1.12555e+08
RXN12316.1	A0A498LJ11	Guanylate cyclase soluble subunit beta-1	35725920	62976304	1496894284	5.31866e+08	28.9865		20709090	30674894	101995879	51126621	25.6076														879483627	29.7121								3.15231e+10	1463930284	1.84712e+10	1.71527e+10	33.9977
RXN06180.1	A0A498LD72	LEG1-like protein	90277853	1.32277e+08	78461672	1.00339e+08	26.5803		28010040		220808800	124409420	26.8905		132807846		123668876	128238361	26.9343								409412350	28.609		106680949	178312984	35430312	1.06808e+08	26.6704		102613756		2.34746e+07	6.30442e+07	25.9099		3057919142	499410133	4476163944	2677831073	31.3184		387091264	1326406086
RXN02577.1	A0A498L9M7	Coronin	58758472	67986926	148980634	9.19087e+07	26.4537		1.42697e+09	35945414	9.70286e+08	811066235	29.5952		487324337	7.95627e+06	1383265886	6.26182e+08	29.222			1.78954e+06	6045051	3.91729e+06	21.9014		351605468	28.3894		2737161055	3750586358	1202482146	2563409853	31.2554		1.64814e+09	180677444	1459787335	1.0962e+09	30.0299		1333934558	275516341	1272159402	960536767	29.8393		2.87793e+09	4618955553
RXN31150.1	A0A498NH26	ATP-dependent RNA helicase DDX19B		5206544		5206544	22.3119		256878434		350438885	3.03659e+08	28.1779		106552920		276810836	191681878	27.5141								137946333	27.0395		17098484	2.78379e+07	11299217	1.87452e+07	24.16		63090574			63090574	25.9109		430435664	18384106	3.32806e+08	2.60542e+08	27.9569		42258612	128319749
RXN25423.1	A0A498N0U2	Angiotensinogen	34952684	40946656		37949670	25.1776		3395844		272732277	1.38064e+08	27.0408		254370776		761351342	507861059	28.9199								447819814	28.7383			9.95073e+07		9.95073e+07	26.5683								12198157529	487075959	8014731492	6.89999e+09	32.6839		56125494	3950811752
RXN27701.1	A0A498N4I5	Alpha-2-HS-glyco-like protein	54531856	289457994	135119384	159703078	27.2508		5.6272e+07		2.77013e+08	166642487	27.3122		444590306		1406079984	925335145	29.7854		1.0682e+07	5346317	3467715	6.49868e+06	22.6317		619734607	29.2071		459646334	234673783	161391036	285237051	28.0876		15362247		9779725	12570986	23.5836		3605350832	632966306	2483738599	2.24069e+09	31.0613		176209788	1004183204
RXN05365.1	A0A498LIQ6	Integrin alpha-5-like protein	38978400	3.55818e+06	362561500	1.35033e+08	27.0087																							38718798		61081406	49900102	25.5725		94244472		760277884	427261178	28.6705			95367593	8000209	51683901	25.6232		9060645
RXN36595.1	A0A498NXA1	EGF-containing fibulin-like extracellular matrix 1 isoform X1	13390415	59203524	188814336	8.71361e+07	26.3768																																										3.62515e+07
RXN26200.1	A0A498MZF4	LYRIC-like isoform X2	49117408	21236254	43607844	3.79872e+07	25.179		2328710		28142008	15235359	23.8609				87452576	87452576	26.382		11640389			11640389	23.4726		172031500	27.3581		14897807	43011384	7.95409e+07	4.58167e+07	25.4494		33639852	134390608	121581064	9.65372e+07	26.5246				10793876	10793876	23.3637		1625657	1.9878e+07
RXN08570.1	A0A498LK15	T-complex 1 subunit epsilon		1.45986e+08	130316548	1.38151e+08	27.0417		1.17863e+09	41146746	1.92325e+09	1.04767e+09	29.9645		108002154		1137710671	6.22856e+08	29.2143		1.68637e+09	961248119	2.43631e+09	1.69464e+09	30.6583		3.873e+08	28.5289		3.98472e+08	252518931	151392059	2.67461e+08	27.9948		2.34047e+08	18029842	1.72166e+08	141414291	27.0754		140154157	133790916	336738371	203561148	27.6009		4.81174e+08	1.89967e+08
RXN31810.1	A0A498NIR2	AMP deaminase (EC 3.5.4.6)	50885736	46304794	5.11309e+07	4.94405e+07	25.5592										15712700	15712700	23.9054												7.0531e+06		7.0531e+06	22.7498
RXN28408.1	A0A498N2L1	ATP-dependent RNA helicase DDX39A	72965008	55363341	110320080	7.95495e+07	26.2453		891101014	12407783	1.09972e+09	6.67745e+08	29.3147		292663882		663877700	478270791	28.8333			8756279	37690283	23223281	24.4691		933374262	29.7979		3.20852e+08	55916756	74553718	1.50441e+08	27.1646		1.33755e+09		3.02461e+08	8.20007e+08	29.6111		738755686	2.68135e+08	858850287	6.21914e+08	29.2121		982648924	3.60159e+08
RXN14313.1	A0A498M382	SLAM family member 7-like isoform X1	84521176	122142777		1.03332e+08	26.6227			985890457		985890457	29.8769			17637400		17637400	24.0721								59390524	25.8237		76519358	684665183	164578361	308587634	28.2011		372985734	216363872	357586738	315645448	28.2337		614969436	108603124	2.10323e+09	9.42266e+08	29.8116		8.49287e+08	451296367
RXN28929.1	A0A498N3G7	60S ribosomal L8	419519894	131514181	3282063021	1277699032	30.2509		9.39211e+08	1.68491e+06	3213775184	1.38489e+09	30.3671		249888739	62009408		1.55949e+08	27.2165		5599479172	2.23519e+09	8.14103e+09	5.32523e+09	32.3102		3.09042e+08	28.2032		1.56803e+09	1759808707	1874450143	1.73409e+09	30.6915		2.03891e+09	5.72152e+07	2716427874	1.60418e+09	30.5792		695428858	5.12767e+08	1804321397	1.00417e+09	29.9034		1.84483e+09	1.12602e+09
RXN18404.1	A0A498MGA8	P2X purinoceptor 4-like protein	136800596	8.38583e+07	291690196	1.70783e+08	27.3476		2.70544e+06	39714424	3.87435e+07	2.70545e+07	24.6894								1.80646e+07			1.80646e+07	24.1067		470350234	28.8092		2.61342e+08	433885422	236497299	3.10575e+08	28.2104		210053088		137320960	173687024	27.3719		34223160		57129472	45676316	25.4449		7.89144e+07	54596428
RXN32704.1	A0A498NLX9	Period circadian-like protein	95160460	105961568	269314558	1.56812e+08	27.2245		1788813065	8.26741e+09	4823559203	4.95993e+09	32.2077		143742160		162382620	153062390	27.1895								1070909756	29.9962		120755048	35079304	87016038	80950130	26.2705		765352745	300663482	325703779	4.63907e+08	28.7893		59704201	151871066	4.55782e+08	2.22453e+08	27.7289		308915414	627122600
RXN02760.1	A0A498L2V9	T-complex 1 subunit alpha	44493604	6.49859e+07	101465322	7.03149e+07	26.0673		9.49789e+08	349924709	1138068045	8.12594e+08	29.598		376055474	22882364	913207532	437381790	28.7043		9.7545e+08	5.38084e+08	1581278392	1.0316e+09	29.9422		604048940	29.1701		3.38184e+08	4.25905e+08	90282978	2.84791e+08	28.0853		6.70135e+08		177249942	4.23693e+08	28.6584		141732916	135989636	1.39669e+08	1.39131e+08	27.0519		4.33987e+08	3.44281e+08
RXN30902.1	A0A498NGC9	Glucose-6-phosphate 1-dehydrogenase (EC 1.1.1.49)	13122609	110399230	32890512	5.21375e+07	25.6358		4.08699e+08		938319945	6.7351e+08	29.3271		3126928054	68852839	3660594930	2.28546e+09	31.0898		3.12451e+07	2.87522e+07	9.60967e+07	5.20313e+07	25.6329		2349329640	31.1296		115692541	1.55962e+08	31542070	1.01066e+08	26.5907		171538892	107623656	4.41057e+07	1.07756e+08	26.6832		205934142	20649056	305953986	1.77512e+08	27.4033		1.60184e+09	3.74658e+08
RXN34906.1	A0A498NTC1	ADP-ribosylation factor 6	251081480	75938397	669291948	3.32104e+08	28.3071		153359427	189349165	374176349	238961647	27.8322														355461702	28.4051		114149754	110989226	129255232	118131404	26.8158		191434266	87915032		139674649	27.0575		51332792	11953473	20954144	2.80801e+07	24.743		1.78856e+08	64968958
RXN34666.1	A0A498NSE5	60S ribosomal L21	55129413	31617396	937601844	341449551	28.3471		4.45117e+08	203584972	1658776667	7.6916e+08	29.5187								2.78302e+09	1.8463e+09	1.88481e+09	2.17138e+09	31.016		296324282	28.1426		5.33268e+08	359549239	1237709200	7.10176e+08	29.4036		4.29935e+08		8.81796e+08	6.55865e+08	29.2888		715431268	300187260	525346653	5.13655e+08	28.9362		501600309	2.76403e+08
RXN05645.1	A0A498LJJ3	ADP-ribosylation factor 8A	61575336	35369547		4.84724e+07	25.5307		370409366	478339472	705523644	5.18091e+08	28.9486										5721615	5721615	22.448		20060788	24.2579		60111466	45986139	7739100	3.79456e+07	25.1774		187705258	13527326		100616292	26.5843				16173330	16173330	23.9471		49603242	181405659
RXN04732.1	A0A498L925	TBC1 domain family member 1 isoform X2	13110951	66690048	48516138	42772379	25.3502		1.54271e+08	1.86961e+07		86483688	26.3659		112255594		439254024	275754809	28.0388								97914793	26.545		9195423	23547641		16371532	23.9647				127075566	127075566	26.9211		23996858		15891510	19944184	24.2495		52932809	34170800
RXN12864.1	A0A498N4C5	Adenylate cyclase-like protein	63219304	10599341	35676424	3.64984e+07	25.1213			20084084		20084084	24.2595									5.43673e+06		5.43673e+06	22.3743					64229545			64229545	25.9367
RXN19725.1	A0A498MRT9	Beta-2-microglobulin	87229936	136677712	140544196	121483948	26.8562														2.44827e+06	1.79444e+06		2.12136e+06	21.0166		332669338	28.3095		893664240	732549076	1214931920	947048412	29.8189		64025152	18127806	140637530	74263496	26.1461		92536264	28930496	218049340	1.13172e+08	26.7539			281657988
RXN13988.1	A0A498LZI5	Hydrolase RBBP9	47618696	172799070	2320098676	846838814	29.6575		106011053	34392348	355937202	1.65447e+08	27.3018				41303572	41303572	25.2998								257758104	27.9414		233813676	16050403	137717528	129193869	26.945		163710160		11123363	8.74168e+07	26.3814		17116322	190227550	212134068	139825980	27.0591		2.01163e+08	188418640
RXN21529.1	A0A498MJQ0	Prefoldin subunit 3-like protein	57777494	14121203	34670416	3.5523e+07	25.0823			107892824		107892824	26.685								1.62819e+07	1.57564e+07	1.12989e+07	1.44457e+07	23.7841
RXN06871.1	A0A498LFE2	Four and a half LIM domains 1-like protein	51936575	16384014	4734622	24351737	24.5375				36870756	36870756	25.136														16272130	23.9559		43494704	15956152	2.81194e+08	1.13548e+08	26.7587								54333055	57323624	8.5483e+07	6.57132e+07	25.9697			8788091
RXN32463.1	A0A498NKP4	Corticosteroid-binding globulin-like protein	4.73541e+06	45160956		2.49482e+07	24.5724		6.54439e+06		5.96025e+07	33073421	24.9792				77328116	77328116	26.2045		9.79738e+06	1.11112e+07		10454303	23.3176		106429040	26.6653		10366315	72571268		4.14688e+07	25.3055			2.40484e+06		2.40484e+06	21.1975		2412819300	3.79863e+08	1.25892e+09	1.35053e+09	30.3309		69035949	417196095
RXN04134.1	A0A498LC93	Retinol dehydrogenase 13-like protein	54333904	35197228	78820788	5.61173e+07	25.7419		8.11724e+06	216754164	273359056	1.66077e+08	27.3073								4.12724e+07			4.12724e+07	25.2987		2.59332e+09	31.2722		115864101	64855313	382824048	1.87848e+08	27.485		4439241481	1096384212	4960990570	3.49887e+09	31.7042		282703532	91919630	1607257390	6.60627e+08	29.2993		300713155	7246878
RXN20001.1	A0A498MEZ8	NADH dehydrogenase 1 beta subcomplex subunit 10	59197722	25465404	175289570	8.66509e+07	26.3687		373464315	518349248	992165591	6.27993e+08	29.2262			69613924	30279652	49946788	25.5739		881250732	6.59595e+08	851896310	7.97581e+08	29.5711		573348458	29.0948		342613541	1.34454e+08	735839134	4.04302e+08	28.5909		107697032		80070698	93883865	26.4844		80153714	1979052180	546747019	868650971	29.6942		404795030	51237559
RXN33677.1	A0A498NQ62	AP-2 complex subunit alpha-2-like isoform X5	2.51718e+07	4.13368e+07	52625698	39711446	25.2431		10662544783	1119495486	1.31944e+10	8.32549e+09	32.9549		269079566	12817707	1813022312	6.98307e+08	29.3793		8.60925e+07	4324543	94728819	6.17153e+07	25.8791		7.66134e+07	26.1911		427233991	383722103	271334907	360763667	28.4265		1643828318	475378185	4.59459e+08	8.59555e+08	29.679		662885791	7.26888e+07	1.52979e+09	7.55121e+08	29.4921		795734472	371025433
RXN34548.1	A0A498NS04	Endophilin-A2-like isoform X2		7.75226e+06	39214952	2.34836e+07	24.4852		26451762		217912948	122182355	26.8645				21989254	21989254	24.3903											17993897	63450344	3183686	28209309	24.7497									53883963		53883963	25.6834			42866984
RXN08795.1	A0A498LTU8	Cytochrome c oxidase subunit 4 isoform mitochondrial	270440496	191652318	867782266	4.43292e+08	28.7237		2051450111	3806652784	4.21061e+09	3.35624e+09	31.6442		152502684	12838838	584033328	2.49792e+08	27.8961		1.89402e+09	4.10496e+08	1291056045	1198525410	30.1586		924401611	29.7839		4756582296	1.13178e+09	12181096991	6.02315e+09	32.4879		2150225616	1740206568	1488429143	1.79295e+09	30.7397		54569728	387739768	661308959	3.67873e+08	28.4546		1.22653e+09	247314735
RXN33244.1	A0A498MNG1	Flavin reductase (NADPH)	18623280	308730504	502355702	2.7657e+08	28.0431		867377664	168642762	3.98364e+09	1.67322e+09	30.64		30433092			30433092	24.8591								597612079	29.1546		1.01096e+09	420869432	4.3418e+08	6.22003e+08	29.2123		112562374		59133548	85847961	26.3553		54752972424	3.52281e+09	44781123922	3.43523e+10	34.9997		6.14258e+08	1150252637
RXN04400.1	A0A498L7T5	Eukaryotic translation initiation factor 3 subunit G (eIF3g) (Eukaryotic translation initiation factor 3 RNA-binding subunit) (eIF-3 RNA-binding subunit) (Eukaryotic translation initiation factor 3 subunit 4)	12789303	9300924		1.10451e+07	23.3969		230232083		594361399	412296741	28.6191		19516598		70288280	44902439	25.4203		656261732	907954609	2122515744	1228910695	30.1947		100095548	26.5768		138418015	8.45715e+07	36695213	8.65616e+07	26.3672		75700444		19713350	47706897	25.5077		129258484	127013974	422295035	2.26189e+08	27.753		68929878	78878719
RXN05351.1	A0A498LAI4	Signal peptidase complex catalytic subunit SEC11 (EC 3.4.21.89)	33939168	37028717	172338072	8.1102e+07	26.2732		25901733	40472676	7.64232e+07	4.75992e+07	25.5044								7.78982e+06	1.15116e+07	1.06472e+07	9.9829e+06	23.251		491722840	28.8733		91915165	48919041	3.51328e+08	1.64054e+08	27.2896		198801548	109259142	29762594	1.12608e+08	26.7467		60923580	2.22732e+07	100415131	6.1204e+07	25.8671		82614938	6.00627e+07
RXN14037.1	A0A498MA66	Ribonucloprotein	46475996	273678080	197834880	1.72663e+08	27.3634				5651814	5651814	22.4303														885683072	29.7222		599039497		4.48822e+08	5.23931e+08	28.9648		33042450		135153176	84097813	26.3256								1.2028e+06	1.64561e+08
RXN14361.1	A0A498LQK2	Membrane-associated progesterone receptor component 1-like protein	73010648	241460449		1.57236e+08	27.2284		9823854	99477069	50938513	5.34131e+07	25.6707		9599632			9599632	23.1945				29753723	29753723	24.8266		1229324774	30.1952		315435308	141838070	128978369	195417249	27.542		302237790		64469014	183353402	27.4501								453358865	1.36597e+08
RXN33765.1	A0A498NP92	Delta(3,5)-Delta(2,4)-dienoyl-mitochondrial	49256748	85961232		67608990	26.0107		616810017	216945418	1.24366e+09	6.92472e+08	29.3672			22160764	48345568	35253166	25.0712		2.37045e+08	2.59805e+08	5.24618e+08	3.4049e+08	28.343		244178706	27.8634		179468541	87443144	129999122	1.32304e+08	26.9793		284798346	81652590	673506157	3.46652e+08	28.3689		112940268	1027343766	379321197	506535077	28.9161		1483492769	216849469
RXN14396.1	A0A498M4K7	Latexin-like isoform X2	46282305	8.42091e+07		6.52457e+07	25.9594			16329171	129604525	72966848	26.1207		129587764		153807066	141697415	27.0782			32433356		32433356	24.951		425838894	28.6657		7366558	1.71927e+08	77395780	8.55632e+07	26.3505			281853852	35701160	158777506	27.2424		1060779333	497792864	930710153	8.29761e+08	29.6281		3.06756e+08	1.01798e+09
RXN24768.1	A0A498MSX6	Epithelial cell adhesion molecule-like protein	66892109	130138492	2.50451e+08	1.4916e+08	27.1523								82048607			82048607	26.29				8.28518e+06	8.28518e+06	22.9821		294910108	28.1357		3.54287e+09	5.06815e+09	8.45865e+09	5.68989e+09	32.4058														2401125133
RXN18039.1	A0A498MAE5	Ubiquitin carboxyl-terminal hydrolase isozyme L5	47321888	4.63822e+07	55971064	4.98917e+07	25.5723		135502379	537692600	627413690	433536223	28.6916		28910730			28910730	24.7851		8.70955e+08	171911788	1092015209	7.11627e+08	29.4065		385292198	28.5214		197062587	54737643	150736419	134178883	26.9996		92636643	5394657	14403158	3.74782e+07	25.1595		25875236	67047751	252173776	1.15032e+08	26.7775		2.158e+08	3.82553e+07
RXN34691.1	A0A498NS73	Glycine--tRNA ligase	52092013	20192436	220392268	9.75589e+07	26.5398		2.80957e+09	331995190	2.3859e+09	1842489500	30.779		246284481	36315456	882718468	3.88439e+08	28.5331		180466968	1.17656e+07	149611151	1.13948e+08	26.7638		590317464	29.1369		173240952	3.00716e+08	99283665	1.9108e+08	27.5096		273634200		22043650	147838925	27.1395		124209632	192160076	277980281	198116663	27.5618		138493197	7.52127e+07
RXN34113.1	A0A498NQC6	Fructose-1,6-bisphosphatase 1-like protein	41452116	7724842	42721360	3.06328e+07	24.8686								32038560			32038560	24.9333								769500804	29.5193		27785435	217699193	14463757	8.66495e+07	26.3687		27792340	165282844		96537592	26.5246			10915897	11385031	11150464	23.4106		81040446	4398169
RXN09579.1	H9C4W7	Cytochrome c oxidase subunit 2	37973544	326914036	955036866	4.39975e+08	28.7128		4405402506	1256118449	6965616739	4209045898	31.9708		29584040	124782232	1342236452	4.98868e+08	28.8941		2969703798	827030241	1813442658	1870058899	30.8004		2553325700	31.2497		1392594916	3294430595	3863920675	2.85032e+09	31.4085		2679235312	1408928372	1468628944	1.85226e+09	30.7866		1136192764	7652908119	2558347490	3782482791	31.8167		2.84445e+09	651096679
RXN24918.1	A0A498MTE3	GTP-binding Rheb-like protein	51017080	30993322	47631288	4.32139e+07	25.365		40722632		32941166	36831899	25.1345														35142780	25.0667		40125162	32016600	1.19518e+08	6.38864e+07	25.929		22855948		33264730	28060339	24.742				76427702	76427702	26.1876		8723556	18307092
RXN28863.1	A0A498N9A6	Ubiquinol-cytochrome c reductase core II	9626899	12398899	44014368	2.20134e+07	24.3919		934760216	3.12867e+09	5.17372e+09	3.07905e+09	31.5198		678616340		2.01298e+09	1.3458e+09	30.3258		154524259	3.09113e+08	513097324	3.25578e+08	28.2784		2253515005	31.0695		5.51071e+08	1.18707e+09	756832290	8.31656e+08	29.6314		504933558		513475476	509204517	28.9237		574934764	9963544418	1942408740	4160295974	31.954		4.52697e+09	59706779
RXN25836.1	A0A498N5K8	Endophilin-B1-like isoform X2	110280522	9354751	82318308	6.73179e+07	26.0045		9058571	14218965	8.24228e+07	3.52334e+07	25.0704														63721440	25.9253		28266687	95606909	25196150	4.96899e+07	25.5664								382843952	55377299	4.69252e+08	3.02491e+08	28.1723		4.33114e+07	29482352
RXN25391.1	A0A498MY19	Coatomer subunit zeta-1-like isoform X2	62828348	97327840	173933124	111363104	26.7307		6.21234e+06	19902798	14265688	1.34603e+07	23.6822																	19564042	46584930	90252198	5.21337e+07	25.6357								73156133		54337292	6.37467e+07	25.9258
RXN29110.1	A0A498N7X2	PDZ and LIM domain 7 isoform X1	2.99282e+06	15505044	69107648	2.92018e+07	24.7996		12675464			12675464	23.5955		122067688			122067688	26.8631			18835431	1.48301e+07	1.68328e+07	24.0048						50670432	74114144	62392288	25.8949		1161956116	1.01144e+09	2.64227e+09	1.60522e+09	30.5801									47515648
RXN20054.1	A0A498ML40	Succinate--CoA ligase [ADP/GDP-forming] subunit alpha, mitochondrial (EC 6.2.1.4) (EC 6.2.1.5) (Succinyl-CoA synthetase subunit alpha) (SCS-alpha)	101576170	6882473	27064900	4.51745e+07	25.429		4.34164e+08	1.12495e+09	2.53674e+09	1.36528e+09	30.3466		86734414	415956332	107109544	2.03267e+08	27.5988		6.76672e+08	7.43009e+08	1631922464	1.0172e+09	29.922		610521332	29.1855		204662827	235841594	4.02474e+08	2.80993e+08	28.066		265745561		824936973	545341267	29.0226		442550210	2.22405e+09	723835017	1.13015e+09	30.0739		2590404102	7.49748e+07
RXN08129.1	A0A498LIH2	60S ribosomal protein L18a	53921052	110840360	1244632326	4.69798e+08	28.8075		462878897	30261828	6.62161e+08	3.85101e+08	28.5207								517215429	6.38172e+08	3.78056e+08	5.11148e+08	28.9292		243058638	27.8567		694945350	850942021	1115778814	8.87222e+08	29.7247		325206008	2.00381e+08	330457856	2.85348e+08	28.0881		204656224	212367460	336243506	2.51089e+08	27.9036		1.79014e+08	146702350
RXN25592.1	A0A498N1E8	Nucleolin-like isoform X5	6.24643e+06	228444910	29101069	8.79308e+07	26.3899		2.13488e+09	156303577	3266184119	1.85245e+09	30.7868		26523576	164078708	330114904	173572396	27.371		251471882	2.3141e+08	3.14654e+08	2.65845e+08	27.986		1329644902	30.3084		1.07849e+09	1319014093	8.43624e+08	1.08038e+09	30.0089		303817159	125751068	175533260	2.017e+08	27.5876		1560935209	7.14928e+08	1902455855	1.39277e+09	30.3753		1.83225e+09	8.57654e+08
RXN17539.1	A0A498M939	V-type proton ATPase subunit G	37507584	47390244	39971212	4.1623e+07	25.3109		1.18903e+08	2163896742	4.94105e+08	9.25635e+08	29.7859		28938390	36943035	65248980	43710135	25.3815								341690893	28.3481		175777711	14028967	120856465	103554381	26.6258				39371027	39371027	25.2306				11599113	11599113	23.4675		42546844	21592404
RXN21404.1	A0A498MPW1	Eosinophil peroxidase-like isoform X1	129381948	14675545	282556860	1.42205e+08	27.0834										26638854	26638854	24.667								2.26976e+09	31.0799		9.44836e+07	9.35031e+07	45068584	7.76851e+07	26.2111				65406978	65406978	25.9629		296906236		2.13932e+08	2.55419e+08	27.9283		1.06948e+10	200079836
RXN18397.1	A0A498MN05	Glutathione S-transferase theta-1-like protein	18675416	2706924342	54559408	926719722	29.7876			603102662		603102662	29.1678														1613563768	30.5876								3024737982	1.50982e+09	2327448108	2.28734e+09	31.091			155715020		155715020	27.2143		1.92203e+10	614412194
RXN04000.1	A0A498N7H4	Coatomer subunit delta	7737650	56716699	30459702	31638017	24.9152		142236343		2.1107e+08	1.76653e+08	27.3963		3001563143	1274993776	6240205026	3505587315	31.707		1.49031e+07	8.03247e+06	2.1767e+08	8.02017e+07	26.2571		6.95481e+08	29.3734		395063807	5.2167e+08	5.2071e+08	4.79148e+08	28.8359		817881604	3.58243e+07	82721600	3.12142e+08	28.2176		76127956	29937569	57408454	5.44913e+07	25.6995		7.8004e+07	3.04118e+10
RXN10236.1	A0A498LT02	Trypsin-3-like protein	41807976	300689269	67013924	136503723	27.0244																				3312328519	31.6252								3667527928	4538500295	8173070126	5.4597e+09	32.3462								32045224
RXN17114.1	A0A498MCU8	60S ribosomal L22-like 1	30075596	18568438	63237016	3.72937e+07	25.1524				8926376	8926376	23.0896								64745575	33724436	4.60785e+07	4.81828e+07	25.522		164732136	27.2955		149285940	45447269	329635814	1.7479e+08	27.381				21289768	21289768	24.3437				24399332	24399332	24.5403		29826614	15631977
RXN10458.1	A0A498LPV0	Bifunctional glutamate proline--tRNA ligase isoform X3	12729721	22877961	52968661	2.95254e+07	24.8155		1.96891e+09		1283734489	1.62632e+09	30.599				90318101	90318101	26.4285		1462842176	5.89265e+07	1.68602e+09	1.06926e+09	29.994		4.57485e+08	28.7691		1.85406e+08	2.15735e+08	29201158	1.43448e+08	27.0959		8.05556e+07	14429247	345892606	1.46959e+08	27.1308		10079158	4.40164e+07	127438460	6.05113e+07	25.8507		3.33392e+08	4.48654e+07
RXN11913.1	A0A498LWH2	Carboxypeptidase B	9882490	164923857	150605823	1.08471e+08	26.6927																				5065620848	32.2381								12129776940	5608035953	12046656790	9928156561	33.2089								31030829	3.07589e+06
RXN09628.1	A0A498LMH6	Integrin beta	39176256	2823164	31473778	24491066	24.5458																																				1.23436e+08		1.23436e+08	26.8792			1.98026e+06
RXN11541.1	A0A498LTN4	Ubiquitin-conjugating enzyme E2 variant 1	663506736	653979144	333572992	5.50353e+08	29.0358		4.84648e+07	223012232	242764172	1.71414e+08	27.3529														984969706	29.8755		450854644	133009716	214230596	266031652	27.987		30812644	38622460		34717552	25.0492			135603744	44930657	9.02672e+07	26.4277		151738172	234861586
RXN18017.1	A0A498MLZ6	60S ribosomal L32	20994938	95212783	194112259	1.0344e+08	26.6242		76487087	11917469	383248028	157217528	27.2282								1.43188e+09	3.31493e+08	7.16098e+08	8.26489e+08	29.6224					43402556	207874001	45208967	98828508	26.5584									33411642	8.16739e+06	2.07895e+07	24.3094		3.40672e+08	5941556
RXN03490.1	A0A498M8D4	ATP synthase subunit mitochondrial-like protein	106103448	216164136	507416928	276561504	28.043		274541858	3791418824	361695385	1.47589e+09	30.4589			90158632	343798400	216978516	27.693								2.98841e+09	31.4767		506646146	497733135	2425756736	1.14338e+09	30.0907		1724854848	126008924	1308524436	1.05313e+09	29.972		30601918	1743723448	120101246	6.31476e+08	29.2342		1668437160	133828848
RXN20471.1	A0A498MH64	Antithrombin-III-like isoform X1	90532684	305766547	167503060	187934097	27.4857		1.69806e+08		4.29855e+08	2.99831e+08	28.1596		671706258	40796504	1928959584	8.80487e+08	29.7137				7895067	7895067	22.9125		3010332568	31.4873		192298390	6.26977e+08	225079476	3.48118e+08	28.375		82091498	41218208	399840323	174383343	27.3777		9279772114	1042506695	6.52846e+09	5.61691e+09	32.3871		6.22317e+08	5444744964
RXN06198.1	A0A498LD70	C-C motif chemokine 8-like protein	181455936	126924282	193644192	167341470	27.3182																				59713724	25.8316		8152084	103002522	12513742	4.12228e+07	25.2969		144873624		96180208	120526916	26.8448			23763322		23763322	24.5022		1.19525e+06	18810774
RXN31276.1	A0A498NHG6	Sulfotransferase (EC 2.8.2.-)	177687768	19057166	199337770	132027568	26.9763		13439271			13439271	23.68		43382084			43382084	25.3706											215484840	87677013	69074792	1.24079e+08	26.8867				153178224	153178224	27.1906								40011532	72137736
RXN15354.1	A0A498M822	Complement C1q 2	14199236	44108536	74795368	4.43677e+07	25.403																								9368281		9368281	23.1594								276388828	32349096	177413280	1.6205e+08	27.2719		8943020
RXN33457.1	A0A498NPI3	Sorcin-like isoform X1		6.86616e+07	364798510	2.1673e+08	27.6913		248974522	501445982	534743915	4.28388e+08	28.6743								8917277	2.38721e+07	21775519	1.81883e+07	24.1165		597311893	29.1539		1.64613e+09	9.28086e+08	2127481024	1.56723e+09	30.5456		560757034	23501492	581253345	388503957	28.5334		269045008	109064249	6.36529e+08	3.38213e+08	28.3334		1063579682	159908599
RXN33734.1	A0A498NQ88	E3 ubiquitin-ligase TRIM32	16307655	313774342	34869756	1.21651e+08	26.8582		393533302		1219708569	8.06621e+08	29.5873		844242696	365483942	833142368	6.80956e+08	29.343		6.10459e+06	9549832	10750908	8.80178e+06	23.0694		1104817949	30.0412		2.99907e+08	692151304	125967685	3.72675e+08	28.4733		76779544	201111706	249223286	1.75705e+08	27.3886		26419746844	1129992474	15666712045	1.44055e+10	33.7459		601735685	8208457758
RXN35223.1	A0A498NTD8	Transmembrane emp24 domain-containing 9-like protein	22816882	182727368	529307340	244950530	27.8679				394489472	394489472	28.5554			30514752		30514752	24.863		1.38801e+08	34757480	1.73287e+08	1.15615e+08	26.7848		216543448	27.6901		450449235	291548910	663822844	4.68607e+08	28.8038		163298516	93525604	268172011	1.74999e+08	27.3828		270408324	238114668	528652181	3.45725e+08	28.365		3.01607e+07	37165468
RXN25383.1	A0A498MZR2	Adenylosuccinate lyase (ASL) (EC 4.3.2.2) (Adenylosuccinase)		24965269	22197904	2.35816e+07	24.4912		74386824		414802499	2.44595e+08	27.8658		337942244	19593540	477086665	278207483	28.0516			7.33491e+06	52315602	2.98253e+07	24.83		6.633e+07	25.9832		3.59292e+07		7.55269e+06	2.17409e+07	24.3739				30523790	30523790	24.8634		1.16475e+08	118791710	69255567	1.01507e+08	26.597		17886898	12630257
RXN09155.1	A0A498LV21	Retinoid-binding 7-like protein	15859664	72638058	66869804	5.17892e+07	25.6261																				192386756	27.5194		14816912			14816912	23.8207		88579552			88579552	26.4005
RXN20042.1	A0A498MKM0	Catenin delta-1-like isoform X1	8.34842e+06	9527028	32179725	1.66851e+07	23.9921		7.88642e+07	24091252	161028749	8.79947e+07	26.3909		26160249		374398786	2.0028e+08	27.5774		23299667		9.25587e+06	1.62778e+07	23.9564		347320553	28.3717		2.84925e+08	4.71182e+08	300738047	3.52282e+08	28.3922		203490239		276267357	239878798	27.8377								204415280	1.32629e+07
RXN28950.1	A0A498N7G9	MOB phocein isoform X3	47758504	126142412	235580312	1.36494e+08	27.0243		5.10224e+07	8.30096e+06	420607401	1.59977e+08	27.2533			8359206		8359206	22.9949		3.64399e+07	154584880	1.75641e+07	6.95296e+07	26.0511		3307920803	31.6233		335240425	88215182	363473039	2.6231e+08	27.9667		216382152		163190450	189786301	27.4998			200625848	3.40241e+07	1.17325e+08	26.8059		9.56948e+06	100082088
RXN24977.1	A0A498N8L5	Glyoxalase domain-containing 5	9289173	8.35229e+06		8.82073e+06	23.0725																				3982679184	31.8911		276454253	64256879	3.15661e+08	2.18791e+08	27.705		35351678	1.44314e+06	126303542	5.43661e+07	25.6962								1.05912e+08
RXN11690.1	A0A498LU93	Glycine N-methyltransferase	153182000	32448410	353854524	1.79828e+08	27.422		21081414	36084236	41505444	3.28904e+07	24.9712								27331801	11786095	41243073	2.6787e+07	24.675		289150152	28.1072		59831960	2.5031e+08	41377212	1.17173e+08	26.8041		513108824	172262994	569475972	4.18283e+08	28.6399			106981296	79895888	93438592	26.4775		443235386	67107928
RXN30836.1	A0A498NG76	Golgin subfamily A member 3-like isoform X1	134225952	22760864	324329344	160438720	27.2574		87913178	2.338e+08	432000420	2.51238e+08	27.9045		104184840		80757072	92470956	26.4625		911637639	4.06469e+08	658664527	6.58924e+08	29.2955		324784680	28.2749		878701122	468218956	590245180	6.45722e+08	29.2663								223785136	203324864	220058173	2.15723e+08	27.6846		5.95193e+07	1.1505e+08
RXN05871.1	A0A498LC44	Xaa-Pro dipeptidase	17650252	6.22885e+07	44516224	4.1485e+07	25.3061		2.37084e+08		228415456	2.3275e+08	27.7942		124605087		209852744	1.67229e+08	27.3172			1.52034e+07		1.52034e+07	23.8579		113125463	26.7533		24091250	1.85487e+08		1.04789e+08	26.6429		1690010586	732143264	1331842311	1.25133e+09	30.2208		62911606		8.57766e+07	7.43441e+07	26.1477		1935967884	209019330
RXN13710.1	A0A498LZL6	Cystatin-B-like protein	151341904	68544860	504566070	241484278	27.8474		4.6034e+07			4.6034e+07	25.4562									2.26063e+06		2.26063e+06	21.1083		271727976	28.0176		254687879	96818848		1.75753e+08	27.389		278938608	22519098	333072124	2.1151e+08	27.6562				85783547	85783547	26.3542		91034088
RXN04097.1	A0A498LEC0	Eukaryotic translation initiation factor 2 subunit 3		6861852	45324306	26093079	24.6372		95377455		196443747	145910601	27.1205		166077476		113496764	139787120	27.0587		4.77522e+08	2.95805e+08	5.48697e+08	4.40675e+08	28.7151		444896088	28.7289		1.54118e+08	130585923	168576400	1.51093e+08	27.1709		448805956		2.16884e+08	3.32845e+08	28.3103		134435539	5934448	225523153	121964380	26.8619		170894056	132684789
RXN07111.1	A0A498LG39	Ras-related Rap-2a	97480862	29983026	146508957	9.13243e+07	26.4445		18050400	158948824		88499612	26.3992										2.73968e+06	2.73968e+06	21.3856					40867892	30663470	110413096	6.06482e+07	25.854		128029416			128029416	26.9319		41786136			41786136	25.3165			87296358
RXN18763.1	A0A498MG16	Complement C4-like protein		4.35327e+07	51420925	4.74768e+07	25.5007		5.79695e+07		1.84641e+08	1.21305e+08	26.8541		467262357	16631776	1869253116	7.84382e+08	29.547								3.60104e+08	28.4238		19189682	9.8166e+07	8.33385e+06	4.18965e+07	25.3203		29147364		96488464	62817914	25.9047		2.27989e+09	358901647	2.19661e+09	1.6118e+09	30.586			1122045749
RXN03811.1	A0A498L605	Transport Sec61 subunit alpha-like 1	3.82138e+06	8996889		6.40914e+06	22.6117				9706475	9706475	23.2105								1.29505e+08	7.35484e+06	1.20338e+08	8.57325e+07	26.3533		3.87449e+07	25.2075		50727462	9.77156e+07	41936630	6.34599e+07	25.9193		546704399	19213621	196201695	254039905	27.9205				1.75642e+07	1.75642e+07	24.0661		70803707	1.16065e+07
RXN36434.1	A0A498MHW1	Poly(U)-specific endoribonuclease-C-like protein	28003522	18546934	224719942	90423466	26.4302		1.54803e+07		6.93225e+07	4.24014e+07	25.3376										4.70974e+06	4.70974e+06	22.1672		94548984	26.4946			46089128	79430678	62759903	25.9033		8.25848e+07		4.36296e+07	63107175	25.9113		18281540		77733014	48007277	25.5167			24359202
RXN04678.1	A0A498L965	Sorting nexin-29	49628052	7930381		2.87792e+07	24.7785		232885937	101350448	1.79474e+08	1.71237e+08	27.3514		55535100		155932512	105733806	26.6559				3.96464e+07	3.96464e+07	25.2407		6.75567e+07	26.0096		101339906	47728655	1.44352e+08	9.78068e+07	26.5434		180779177	31690912	138800194	1.1709e+08	26.803			130377496	99297395	1.14837e+08	26.775		166125464	602362799
RXN31783.1	A0A498NIW0	Apoptosis regulator BAX-like protein	28388646	46311006	49746956	4.14822e+07	25.306																								18387212	79566536	48976874	25.5456		58955904	14013278		36484591	25.1208			37358860		37358860	25.1549
RXN08436.1	A0A498LMZ7	High mobility group B2-like protein	30912956	49694784		40303870	25.2644			614330359	169257008	3.91794e+08	28.5455			44413576		44413576	25.4045			3.5918e+06		3.5918e+06	21.7763		93433034	26.4774		1321005428	677998687	1624618247	1.20787e+09	30.1698				91061416	91061416	26.4403		421104214	623554912	886213519	643624215	29.2616		5.06511e+08	180005079
RXN20491.1	A0A498MH85	Cold-inducible RNA-binding B-like isoform X1	52505960	98796136	158940288	103414128	26.6239		1.16456e+08	200663366	4.17071e+08	2.4473e+08	27.8666		56126400			56126400	25.7422		38049390	84172008		61110699	25.8649		129268910	26.9458		17091152	86334000	1.98881e+06	3.5138e+07	25.0665		21186502		9955554	15571028	23.8924			49128201	91537954	7.03331e+07	26.0677		35456652	33172044
RXN09477.1	A0A498LVZ6	Proteasome endopeptidase complex (EC 3.4.25.1)	182691984	13309131	232109496	142703537	27.0884		6.11452e+07	78314610	406927405	1.82129e+08	27.4404		1.44387e+08	134943868	94550328	1.24627e+08	26.893		2.24043e+08	2.73431e+08	267032137	2.54835e+08	27.925		97310300	26.5361		1.01594e+09	332732382	695135440	6.8127e+08	29.3437		3.20425e+08	37753124	391433304	2.49871e+08	27.8966		185181761	7.26785e+07	5.81282e+08	2.79714e+08	28.0594		4.87839e+08	2.64925e+08
RXN23836.1	A0A498N004	Diacylglycerol kinase (DAG kinase) (EC 2.7.1.107)	101669416	35788656	325847600	154435224	27.2024		168693922	72753872	7.39665e+08	3.27038e+08	28.2849														6.60207e+06	22.6545		17088070	6992201	204497057	7.61924e+07	26.1831				54109732	54109732	25.6894									13827992
RXN13913.1	A0A498M237	Prefoldin subunit 4		5.67397e+06	46997728	2.63358e+07	24.6505																								74045688		74045688	26.1419														31251166
RXN26263.1	A0A498N280	Cartilage matrix-like protein	944114253	525344548	2294352878	1254603893	30.2246		11373732		13445407	1.24096e+07	23.5649		60366842447	3214209282	141531076326	6.83707e+10	35.9927											6.6597e+09	3926252192	6.65613e+09	5747360240	32.4203															231202752
RXN20388.1	A0A498MGL5	ATP synthase subunit mitochondrial-like protein	151266160	96211924	232930768	160136284	27.2547		23229832	24813552		24021692	24.5178								11238224	30287434	9246366	16924008	24.0126		118639864	26.822		62002940	123886744	61209612	82366432	26.2956		213114740		227802576	220458658	27.7159			212195648	3.63876e+06	1.07917e+08	26.6853
RXN19724.1	A0A498MK68	DNA helicase B-like protein	16629765	7.06475e+06	70149324	3.12813e+07	24.8988		1.17839e+08	172115230	224653295	1.71536e+08	27.3539			11987675		11987675	23.515		7.42744e+07		1935157221	1.00472e+09	29.9041		21986332	24.3901		39108218	29872886	61425872	43468992	25.3735		97044376			97044376	26.5321				30323492	30323492	24.8539		98031488
RXN25589.1	A0A498MUI6	DNA-directed RNA polymerases I, II, and III subunit RPABC3	16473596	5.12258e+06	63525712	2.8374e+07	24.7581		30208944	6.52491e+06	27735114	2.14897e+07	24.3571								2.58652e+06	3775343	5.78041e+06	4047426	21.9486		17488944	24.0599		51534848		101157296	76346072	26.1861		48329288	13658848		30994068	24.8855		145266138		91838326	118552232	26.8209		14330882	1.65184e+07
RXN25563.1	A0A498N090	Ubiquitin-conjugating enzyme E2 K	11898132	10274525	322059899	1.14744e+08	26.7738		40883278	24427824	271525326	1.12279e+08	26.7425								12258676	2.501e+07	39983596	2.57508e+07	24.6181		61162380	25.8661		53836032		35646372	44741202	25.4151		116761976			116761976	26.799			42681004		42681004	25.3471
RXN26834.1	A0A498N589	Neutral alpha-glucosidase AB-like isoform X2	14055252		16117377	1.50863e+07	23.8467		172421236	12803595	4.2226e+08	2.02495e+08	27.5933				38075400	38075400	25.1824		2.11984e+08	3.23969e+09	112648807	1.18811e+09	30.146		90787931	26.436		15655565	1.29535e+08	2.18671e+07	5.5686e+07	25.7308		9.16003e+07		9.85861e+07	9.50932e+07	26.5028		106896796		5.05416e+07	7.87192e+07	26.2302		159477938	7.46427e+07
RXN33108.1	A0A498NMX0	Vesicle-fusing ATPase isoform X1	49708180	45765523		4.77369e+07	25.5086		25886374639	10123885289	2.5554e+10	2.05214e+10	34.2564		891723120	107354130	4249625686	1.74957e+09	30.7044		7.36482e+08	4.73639e+08	7.026e+08	6.37574e+08	29.248		374817637	28.4816		2.47493e+08	104437801	151794789	1.67908e+08	27.3231		1.22867e+09		2.83377e+08	7.56026e+08	29.4939		2.78137e+08	166862898	1.2761e+09	5.737e+08	29.0957		14984577	7.25592e+07
RXN15623.1	A0A498M6T7	Forkhead box G1-like protein	41992924	48147284	87216680	5.9119e+07	25.8171		15679970	121409360	57421425	6.48369e+07	25.9503								82572427	3.55232e+07		5.90478e+07	25.8154		377904996	28.4934		3.56473e+08	245223400	316340219	3.06012e+08	28.189		279216328		50324656	164770492	27.2959			13993384	54000518	33996951	25.0189		2.10238e+08	49037145
RXN03073.1	A0A498L6L1	40S ribosomal protein S12	266257712	1301672352	2490216238	1352715434	30.3332		8139436	585116161	207666336	2.66974e+08	27.9921				81144288	81144288	26.274		6.91191e+08	1.159e+09	413276848	7.54488e+08	29.4909		6635127104	32.6275		1142430781	1243119408	1666818150	1.35079e+09	30.3312		191983072	278559502	1039884540	5.03476e+08	28.9073		19394610	51500424	146374628	7.24232e+07	26.1099		1369873821	339953619
RXN25562.1	A0A498N1B2	UDP-glucose 6-dehydrogenase	10423770	1.79483e+07		1.4186e+07	23.758		2.51069e+07	5810981	21297908	1.74053e+07	24.053		143700610		425153998	284427304	28.0835		18859156	19882961	50578368	29773495	24.8275		398191277	28.5689		3.88461e+07	5.33864e+07	7.02868e+06	3.30871e+07	24.9798		602714989	68381764	437088501	3.69395e+08	28.4606			24560437	14710701	19635569	24.227			3.45568e+07
RXN02300.1	A0A498L1I1	Cytoskeleton-associated 4	35015299	14195448		2.46054e+07	24.5525										25312472	25312472	24.5933											29028773	3.69598e+07	6.9517e+07	4.51685e+07	25.4288															31525478
RXN02790.1	A0A498L311	Translationally-controlled tumor-like protein	80884472	790846418	742961588	538230826	29.0036		95328757	290924108	528610187	3.04954e+08	28.184								3.30211e+08	459765762	2.62129e+08	3.50702e+08	28.3857		276204123	28.0412		266074893	1235225224		7.5065e+08	29.4836		117061864	13553024	228126016	1.1958e+08	26.8334		215715104	484159562	372041092	3.57305e+08	28.4126		4.4935e+08	148645264
RXN10360.1	A0A498LQB2	Actin-related protein 2/3 complex subunit 5	67042368	10971104		39006736	25.2172			101900928	5146136	53523532	25.6737														29542928	24.8163		22941466	5639484		14290475	23.7686									1.86016e+07		1.86016e+07	24.1489		19734268
RXN09457.1	A0A498LVW9	MARCKS-related-like protein		112226037		112226037	26.7418																				112009208	26.739
RXN16998.1	A0A498M7T0	Death-associated-like 1-B	36621208	22360706	140608554	66530156	25.9875														1.87039e+08	1.93897e+08	109870364	1.63602e+08	27.2856		128017196	26.9318		32292655		7890498	2.00916e+07	24.2601														1.09223e+06	45197652
RXN34042.1	A0A498NPR6	Dynein light chain Tctex-type 3	46296084	14837995	46943636	36025905	25.1025		74456780		67400700	70928740	26.0799																							208343712		30777440	119560576	26.8332									13150171
RXN21049.1	A0A498MIB3	Acidic leucine-rich nuclear phospho 32 family member A	31595492	9200013	135963904	58919803	25.8122		1.38541e+08	168945020	7.45573e+08	3.5102e+08	28.387								99765305	3.78469e+07	301121265	1.46244e+08	27.1238		177804488	27.4057		6.5317e+08	1.20585e+09	820951415	8.93325e+08	29.7346		521462690		260158421	3.90811e+08	28.5419		686517960	172069226	1287133328	7.1524e+08	29.4139		1.07556e+09	373406701
RXN04669.1	A0A498L8V2	Aconitate hydratase, mitochondrial (Aconitase) (EC 4.2.1.-)		38515626	91532612	65024119	25.9545		2.24566e+10	6.33069e+09	2.70701e+10	1.86191e+10	34.1161		3300405655	9.69228e+08	20075555498	8.11506e+09	32.918		1.88963e+09	6.73932e+08	1.0441e+09	1.20255e+09	30.1635		4.11258e+09	31.9374		2086601820	1838721012	5.40294e+08	1.48854e+09	30.4712		1701702177	81455424	2.3877e+09	1.39029e+09	30.3727		6.03355e+09	31581166883	8.97116e+09	1.55286e+10	33.8542		1.15125e+10	680811973
RXN17492.1	A0A498P4F6	Quinone oxidoreductase	17515268	14285455	20449400	1.74167e+07	24.054		2.58252e+08	1.49271e+08	767468296	3.91664e+08	28.545			44831334		44831334	25.418		2563106			2563106	21.2895		557370157	29.0541		60977924	7.86083e+07	113991556	8.45259e+07	26.3329		394406902	23891120	592241852	3.36847e+08	28.3275		1547025872	1.14737e+08	1053179972	9.04981e+08	29.7533		1.03754e+09	10725121
RXN06153.1	A0A498LFA4	Heterogeneous nuclear ribonucleo Q isoform X1	37207708	7.72753e+07	79117548	6.45335e+07	25.9435		4.83103e+08	35832876	795076825	4.38004e+08	28.7064		103616501	52230770	1389049194	5.14965e+08	28.9399		2.46519e+07		73368552	4.90102e+07	25.5466		26270898	24.647		1.30848e+08	8.94241e+08	209887048	411658399	28.6169		494897120		341997209	4.18447e+08	28.6405		522614225		9.84687e+08	7.5365e+08	29.4893		164624787
RXN21541.1	A0A498MKE8	GMP reductase (GMPR) (EC 1.7.1.7) (Guanosine 5'-monophosphate oxidoreductase) (Guanosine monophosphate reductase)	115741452	24684548	37155072	5.91937e+07	25.8189		5.83896e+08	8996288	1.55058e+09	7.1449e+08	29.4123								5.24154e+07	35922227	1.57808e+08	8.20486e+07	26.29		253597885	27.918		50939628	68375465	33453008	5.09227e+07	25.6018				154232512	154232512	27.2005		47393744	15287054	850420165	3.04367e+08	28.1812		142840946	40907612
RXN13982.1	A0A498M3E5	Mannose-1-phosphate guanyltransferase beta	72953552	8634412	200406462	93998142	26.4861		61396034		347186074	204291054	27.6061		12447903			12447903	23.5694								183848740	27.4539		26005626	27965528		26985577	24.6857		64448767		122227984	9.33384e+07	26.476			17376096	321643095	1.6951e+08	27.3368		55033636	2.00544e+06
RXN06738.1	A0A498LEP1	UPF0587 protein C1orf123-like	49115180	219070864	241215608	1.69801e+08	27.3393			81836366	9962772	45899569	25.452														95523624	26.5094			23648890	34883588	29266239	24.8027									35812584		35812584	25.094		3500453
RXN17916.1	A0A498MG46	Peroxiredoxin-6-like protein	54208780	56872604	587343192	232808192	27.7946		1208351824	1446950976	1974088685	1543130495	30.5232		23437372		164711576	94074474	26.4873		113210190	286284561	83763301	1.61086e+08	27.2633		1595811392	30.5716		193953678	803807525	210382484	4.02715e+08	28.5852		1850463088		616846826	1233654957	30.2003		124563014	92821144	502254501	239879553	27.8377		4072242146	834517932
RXN33499.1	A0A498NP51	Carboxylesterase notum2-like protein	23738182	60602113	159160472	8.11669e+07	26.2744		5.18605e+08	2334277448	476958677	1.10995e+09	30.0478		250892304	218645623	550960836	3.40166e+08	28.3417		9.07645e+06	1.55447e+07		1.23106e+07	23.5534		975729750	29.8619		618564113	2.6215e+08	1304950707	7.28555e+08	29.4405		1425579388	98639679	986469960	8.36896e+08	29.6405		172214921	4380245112	1.8774e+08	1.58007e+09	30.5573		869233252	3.25657e+07
RXN11327.1	A0A498M1U7	Methylmalonate-semialdehyde dehydrogenase [acylating] mitochondrial		26963698	58988860	42976279	25.357		1.815e+09	849081414	3829844449	2.16464e+09	31.0115		2206001058	37178520	2844835782	1696005120	30.6595		1.17366e+09	1.08518e+09	2.76996e+09	1.67627e+09	30.6426		809314194	29.5921		626732714	9.59854e+08	252132621	6.12906e+08	29.1911		407806912		1009853153	7.0883e+08	29.4009		673262250	9.7263e+09	1100056737	3.83321e+09	31.8359		8.13379e+09	352791617
RXN32611.1	A0A498NL90	Glucose-6-phosphate exchanger SLC37A4-like protein	257898144	610014464	1190232232	686048280	29.3537		69852078	878689114	192710981	380417391	28.503			89795880		89795880	26.4201		362906233	3.99628e+08	3.44459e+08	3.68998e+08	28.459		2649109830	31.3029		5.29312e+08	1.2339e+09	1861720656	1.20831e+09	30.1703		474235678	125486666	680406971	4.2671e+08	28.6687		176265548	542407444	342483654	353718882	28.398		1490390716	214726698
RXN22919.1	A0A498MN52	Single-stranded DNA-binding mitochondrial	41633664	30992386	199264912	9.06303e+07	26.4335		28216973		3.367e+07	3.09435e+07	24.8831		15293987		52949236	3.41216e+07	25.0242		1.98162e+07	80458231	1.9625e+07	3.99665e+07	25.2523		168102432	27.3248		3.07715e+07	9750031	53352664	3.12914e+07	24.8993		149649200		22027672	85838436	26.3551			56533372	6376184	31454778	24.9068		1.95208e+06	1.71164e+07
RXN20069.1	A0A498MFS3	GTPase IMAP family member 4-like protein	24949232	9496477	29989804	2.14785e+07	24.3564				1.8406e+07	1.8406e+07	24.1337				37053220	37053220	25.1431								78229664	26.2212		2.38828e+07		13543657	1.87132e+07	24.1576		433665911		10723874	2.22195e+08	27.7273									19094966
RXN31363.1	A0A498NHN2	Disulfide-isomerase A5		8448578		8448578	23.0103														3.86217e+08	8.0495e+08	724062809	638409990	29.2499		392965045	28.5498		224922988	282559972	76658122	194713694	27.5368				177233940	177233940	27.4011									4.91305e+07
RXN03761.1	A0A498L5V8	Poly(U)-specific endoribonuclease-A-like isoform X2	38207480	98566738	59466616	6.54136e+07	25.9631																				1591242026	30.5675								2551734810		858188688	1704961749	30.6671									10809834
RXN19082.1	A0A498MI44	Poly [ADP-ribose] polymerase (PARP) (EC 2.4.2.-)	23032266	61604283	91707104	5.87812e+07	25.8089			1305785654	427711283	8.66748e+08	29.691		226130374		165134748	195632561	27.5436		5.9062e+07	4.10416e+07	5.09294e+07	5.03444e+07	25.5853		976745112	29.8634		812574731	1220892612	1297838353	1110435232	30.0485		263363060		465128012	364245536	28.4403		49499419	1392636451	81175956	5.07771e+08	28.9196		1698122729	166306500
RXN02706.1	A0A498MUN5	Cytochrome c oxidase subunit 4 isoform mitochondrial-like protein	84480928	1.99676e+08	224871156	1.69676e+08	27.3382		82345534	189045268	1.58643e+08	1.43345e+08	27.0949		50547796	77074244		63811020	25.9273								97757231	26.5427		113619736	67358546	710437684	2.97139e+08	28.1466		925123108	345785458	884765320	718557962	29.4205		36979436	412576824	79625808	1.76394e+08	27.3942		94959938	71013058
RXN11100.1	A0A498LSE1	G--signaling modulator 1-like isoform X2	123415648	399667012	41635140	1.88239e+08	27.488		766485952	62838188	2344801594	1.05804e+09	29.9787				172868448	172868448	27.3651								245375744	27.8704		79948680	28746510		54347595	25.6957								54003732		248992916	151498324	27.1747			392522502
RXN11326.1	A0A498LVZ9	Maleylacetoacetate isomerase isoform X2	15244254	209532025		1.12388e+08	26.7439			86843052	7464431	4.71537e+07	25.4909								2.86953e+06			2.86953e+06	21.4524		203689669	27.6018		41637640	37696845	2.89957e+07	3.61101e+07	25.1059									32744820		32744820	24.9648		5.56195e+08	9870482
RXN17677.1	A0A498ML35	N-acetylgalactosamine-6-sulfatase	52634256	92146520	465750990	2.03511e+08	27.6005		23029192	132854520	76718874	7.75342e+07	26.2083								66686476	2.31697e+08	98694727	1.32359e+08	26.9799		238790761	27.8312		61708889	1.62851e+08	86477980	1.03679e+08	26.6276		177627136	39866100	46098843	8.7864e+07	26.3888		52336984	167480870	154363732	1.24727e+08	26.8942		313747388	68309184
RXN02528.1	A0A498NJK1	Eukaryotic translation initiation factor 3 subunit D (eIF3d) (Eukaryotic translation initiation factor 3 subunit 7)	5.26352e+06	13256925		9.26022e+06	23.1426		143815002	8633932	236710614	1.2972e+08	26.9508		3.7702e+07	12591692	359291408	1.36528e+08	27.0246		4.59133e+08	8.96291e+07	9.90886e+08	5.13216e+08	28.935		1.29714e+08	26.9508		227545344	166556089	106686059	166929164	27.3147		72310568		8067133	4.01889e+07	25.2603			23282370	68692592	45987481	25.4547		2.62518e+08	63703359
RXN28637.1	A0A498NEM5	Fatty acid binding 1	15441356	695003320		355222338	28.4041																				560945248	29.0633								8002026282	1293321278	5297445973	4864264511	32.1796			4193101		4193101	21.9996		2.40969e+08
RXN17247.1	A0A498MJU8	Galectin		64038492	49834889	5.69367e+07	25.7629		31029264		9.15817e+07	6.13055e+07	25.8695														1.35904e+09	30.3399			6.47403e+07		6.47403e+07	25.9482		448257760	80283734	157413616	2.28652e+08	27.7686		1261561505	3.73499e+08	1.80531e+09	1.14679e+09	30.095		59297742	80317510
RXN27361.1	A0A498N3M1	Galectin	36649016	7.64816e+06	174917456	7.30715e+07	26.1228		7.07377e+06			7.07377e+06	22.754								16478700	137385928	98176525	8.40137e+07	26.3241		20794328	24.3097		12485191	37695872	9.48574e+07	4.83462e+07	25.5269															11088932
RXN04105.1	A0A498LFD6	Protein disulfide-isomerase (EC 5.3.4.1)		294033013	304848208	2.99441e+08	28.1577		3.57456e+08	40688068	368713353	2.55619e+08	27.9294		302719648	26225892	870210020	399718520	28.5744		1483872299	465607845	2.0164e+09	1.32196e+09	30.3		7.39771e+08	29.4625		1.13747e+09	1.04332e+09	5.181e+08	8.99631e+08	29.7448		2.38029e+08	23039294	470001904	2.4369e+08	27.8605		224967599	214422995	5.61468e+08	3.3362e+08	28.3136		5.65062e+08	7.31935e+08
RXN14811.1	A0A498M2R0	60S ribosomal L5	176975584	22934008	541696068	2.47202e+08	27.8811		91519823		905193158	4.98356e+08	28.8926								1.89892e+09	458229996	4441000030	2.26605e+09	31.0775		166882080	27.3143		625248731	400160779	1.10561e+09	7.1034e+08	29.4039		889241892		753852222	821547057	29.6138		60425035	35892604	886884351	3.27734e+08	28.288		788661064	19617716
RXN34862.1	A0A498NRZ2	Fibulin-1 isoform X1	346684576	317851388	2074847160	913127708	29.7662		7636603			7636603	22.8645				27315854	27315854	24.7032				15731573	15731573	23.9072					43581660		34585244	39083452	25.2201								61926796		125035591	9.34812e+07	26.4782			266989448
RXN15235.1	A0A498MCJ2	Cytoglobin-1-like protein	38201228	315390107	253537124	202376153	27.5925																				1773264703	30.7238								375453161	36058775	1190439100	5.33984e+08	28.9922
RXN26898.1	A0A498MY64	Proliferation-associated 2G4	38736096	66385703	79500910	61540903	25.875		104781739	105679290	299120933	169860654	27.3398		134727720		174998560	154863140	27.2064		1.19245e+09	5.49156e+08	1.87731e+09	1.20631e+09	30.1679		2.5246e+08	27.9115		3.06025e+08	461469162	1.75184e+08	3.14226e+08	28.2272		93363132		2.12002e+08	1.52683e+08	27.186		211001280	198960084	312499115	2.4082e+08	27.8434		653262874	203130883
RXN17323.1	A0A498MBY5	C-C motif chemokine	92720576	17661714	79581246	6.33212e+07	25.9162																							206858463	105589993	136601588	149683348	27.1573		25409754		140937160	83173457	26.3096			49731676		49731676	25.5677			21213632
RXN27152.1	A0A498LH60	T-complex 1 subunit theta isoform X2	29981890	1.34831e+08	108755578	9.11894e+07	26.4424		1.69557e+09	50339182	2.13313e+09	1293011786	30.2681		523606370	27872969	1659176700	7.36885e+08	29.4569		1.61271e+09	3.68536e+08	3138045197	1706431890	30.6683		1403831953	30.3867		7.88495e+08	541004000	535196863	6.21565e+08	29.2113		314467484	80487391	311349563	2.35435e+08	27.8108		393994645	309408511	4.71064e+08	3.91489e+08	28.5444		3.27234e+08	4.10872e+08
RXN21579.1	A0A498MJU1	High mobility group B3-like protein		18313120	20599526	19456323	24.2137		7.12877e+07	2027635640	4.63676e+08	8.542e+08	29.67			34226184		34226184	25.0286		11457297			11457297	23.4498		97009022	26.5316		1.50178e+08	532916352	4.54518e+08	3.79204e+08	28.4984		265784672			265784672	27.9857			23597036		23597036	24.4921		76810976
RXN10451.1	A0A498LQS7	Spectrin beta erythrocytic-like protein	13251148	21400754	65806660	3.34862e+07	24.9971		976798926	157552048	802302393	6.45551e+08	29.266														268350776	27.9995		30276193	2.43648e+08	8399565	9.41079e+07	26.4878		1152858258	54111530	283444273	496804687	28.8881		1418067901	503838454	2.71161e+09	1.54451e+09	30.5245		135022266	129486064
RXN19628.1	A0A498MEJ1	Microtubule-associated 1B-like protein	32553950	37524072	106188812	5.87556e+07	25.8082		2.15096e+10	5231557840	19165280241	1.53021e+10	33.833																							34470140			34470140	25.0388		99592641		2622751798	1.36117e+09	30.3422			6.40263e+06
RXN16382.1	A0A498MAF0	Proteasome subunit alpha type-1	127391840	13729395	35263136	5.87948e+07	25.8092		100183848	145855216	482241086	242760050	27.855		93507616	108521732	144687520	1.15572e+08	26.7842		64527452	2.12444e+08	367296948	2.14756e+08	27.6781		542241532	29.0144		139325384	397953562	339914207	2.92398e+08	28.1234		79428532	14021833	147905736	8.0452e+07	26.2616		332593991	3.95058e+08	1.92808e+08	3.0682e+08	28.1928		2.97086e+08	64706936
RXN11799.1	A0A498LTP4	Heterogeneous nuclear ribonucleo D0-like isoform X1	54082740	39524316	171892172	8.84997e+07	26.3992		923016658	1.07355e+09	3.2349e+09	1.74382e+09	30.6996		146762910	30130898	195385124	1.24093e+08	26.8868		8.31971e+07	82372253	114137617	9.32357e+07	26.4744		229084484	27.7713		138159164	198361141	126368772	154296359	27.2011		2274450654	5132573	60602140	780061789	29.539		9.28234e+07	112461934	1052986118	4.19424e+08	28.6438		190476138	5.38275e+07
RXN24408.1	A0A498MS17	Glycoprotein hormones alpha chain		1.05296e+08	12773083	5.90346e+07	25.8151		1.77028e+08	16889580	5.36194e+08	2.43371e+08	27.8586		9837343		231826526	1.20832e+08	26.8484		6.47498e+08	70636155	6.54884e+08	4.57673e+08	28.7697		695037448	29.3725		22371737	30021713	36524123	29639191	24.821		2.97052e+08		160854644	2.28953e+08	27.7705		218901076	1.7552e+08	3.01874e+08	232098449	27.7902		1351554032	19034651
RXN17146.1	A0A498MHV3	Isovaleryl-mitochondrial	13379069	17069086	59847430	3.00985e+07	24.8432		1645708035	420905659	4427794944	2.1648e+09	31.0116		121628928		428346282	274987605	28.0348		8.78748e+08	575804179	1.21e+09	888185519	29.7263		608175798	29.1799		239956114	203102650	110591156	1.8455e+08	27.4594		325969594	166859123	68912147	1.87247e+08	27.4804		610412162	4442881223	1093919315	2049070900	30.9323		3.8295e+09	9.43715e+07
RXN39272.1	A0A498P3L6	Calcium-binding mitochondrial carrier Aralar1-like protein		17896239		17896239	24.0932		9681030736	5.32009e+08	8529861527	6.24763e+09	32.5407		1.7054e+09	1.47082e+08	3.85067e+09	1.90105e+09	30.8241		2.45127e+08	9.08929e+06	3.58858e+08	204358050	27.6065		1336451933	30.3158		5.43278e+08	7.69884e+08	5.28429e+08	6.13864e+08	29.1933		3.68679e+08	540801395	1.19553e+09	7.01669e+08	29.3862		1047845025	4183517046	2.30006e+09	2.51047e+09	31.2253		2.54614e+09	7.1591e+07
RXN24864.1	A0A498MZ96	Ribose-5-phosphate isomerase	13107038	11330340		12218689	23.5426		30946694	92108656	7.61351e+07	6.63968e+07	25.9846								168874552	5.03528e+08	94999235	2.55801e+08	27.9304		52810296	25.6543		86517956	2.11565e+07	24544388	4.40729e+07	25.3934			58902688		58902688	25.8118			24516189		24516189	24.5472		133396973
RXN05559.1	A0A498M5X4	Thrombospondin-1-like protein		537122107	115714532	3.26418e+08	28.2821																									6.57154e+06	6.57154e+06	22.6478
RXN10044.1	A0A498LTD9	Coatomer subunit zeta-1	31511618	20283176	125078548	5.89578e+07	25.8132		50879005		171301868	1.1109e+08	26.7272								65021330	16228556	83516875	5.49223e+07	25.7109		62623794	25.9002			40892823	59064926	4.99789e+07	25.5748		100689680	84911036	81139920	8.89135e+07	26.4059		50319604	25323108		37821356	25.1727
RXN10888.1	A0A498LR17	Nap-like protein	98572136	56055474		77313805	26.2042		1185592858	3.42243e+09	6444862464	3.68429e+09	31.7787		284083968	48478840	286291926	2.06285e+08	27.6201		291451669	135635663	343901145	256996159	27.9372		558249816	29.0563		102880055	300272672	904275165	4.35809e+08	28.6991		452123068		655609010	553866039	29.045			2800313453	1896318941	2348316197	31.129		1179684651	67860352
RXN28524.1	A0A498N9X4	Eukaryotic translation initiation factor 3 subunit E (eIF3e) (Eukaryotic translation initiation factor 3 subunit 6)	18275162	21272097	26357056	21968105	24.3889		86880336		2.5324e+08	1.7006e+08	27.3415														207478208	27.6284		16701012	8045765		1.23734e+07	23.5607				59727858	59727858	25.8319		51368516	7.67056e+06		2.95195e+07	24.8152
RXN32255.1	A0A498NK83	Trifunctional enzyme subunit mitochondrial	6.49561e+07	440723307	237222682	2.47634e+08	27.8836		2.9188e+09	1267779558	4.05037e+09	2.74565e+09	31.3545		624205166		1097543864	860874515	29.6812		3013292564	2.74518e+09	4993543099	3.58401e+09	31.7389		3573119478	31.7345		8.71105e+08	1.55159e+09	825651177	1.08278e+09	30.0121		808061150	18868578	904452597	5.77127e+08	29.1043		2710342262	17009877942	2462480476	7394233560	32.7838		6.51349e+09	9.06641e+08
RXN06306.1	A0A498LH04	Proteoglycan 4-like isoform X3	26582742	17593428	39535728	27903966	24.734		9479389			9479389	23.1764														8.64311e+07	26.365		30060989			30060989	24.8414								1267482376		426361741	8.46922e+08	29.6577			13322487
RXN29504.1	A0A498NC63	Dynactin subunit 2 isoform X2	11412990	1460111	109460356	40777819	25.2813		133573324	408627930	609173796	3.83792e+08	28.5157		240109132		652313868	446211500	28.7332		7.06392e+07	1.56837e+08	163630416	1.30369e+08	26.958		2.50756e+08	27.9017		27785472	193000476	9734024	7.684e+07	26.1954									141644880	32344662	86994771	26.3744		57550900	77266835
RXN18284.1	A0A498MFY3	Carboxylic ester hydrolase (EC 3.1.1.-)	5998256	176603158		91300707	26.4441		129814322		5.96065e+08	3.6294e+08	28.4352		163145786	142214376	1302030912	5.35797e+08	28.9971								2.96183e+08	28.1419			165140669		165140669	27.2991								3967943964	542815796	3109913079	2.54022e+09	31.2423		38411030	768888127
RXN10257.1	A0A498LYL9	Apolipo A-I-like protein		901285684	22832240	462058962	28.7835		73963362		646796861	3.6038e+08	28.4249			56103084	153831104	104967094	26.6454								5.19161e+07	25.6297		76058384	107986270		92022327	26.4555		1093176148		723686510	908431329	29.7588		1791931650	1529832589	2559527995	1.96043e+09	30.8685		4.98407e+08	1157370451
RXN30182.1	A0A498ND13	Multidrug resistance-associated 5	29386406	25839162	96986240	5.07373e+07	25.5965		17287228		53318728	35302978	25.0733								1.2566e+08	1.41131e+08	52296877	1.06363e+08	26.6644		147721952	27.1383			399588882	6.89317e+07	2.3426e+08	27.8035										21228156	21228156	24.3395			60643088
RXN27344.1	A0A498N6N0	Leucine-rich repeat-containing 57	16484824		29584848	23034836	24.4573		24098240	74674936	60995224	5.32561e+07	25.6664																			2.66629e+07	2.66629e+07	24.6683
RXN21613.1	A0A498MP80	Coatomer subunit beta (Beta-coat protein)		18048686		18048686	24.1054		4.05774e+08		4.34365e+08	4.2007e+08	28.6461		20645592	4679558	391929582	1.39085e+08	27.0514		2.39541e+08	2.7752e+06	1.32373e+08	1.24896e+08	26.8962		260022050	27.9541		3.27049e+08	2.30392e+08	2.67668e+08	2.75036e+08	28.035		1854981251	3.14479e+08	3.38384e+08	8.35948e+08	29.6388		246034408	13877230	3.1185e+08	1.90587e+08	27.5059		72643324	57018456
RXN29072.1	A0A498NB21	Ribulose-phosphate 3-epimerase	11178644	33862056	79790554	41610418	25.3104														2.81342e+06	8018445		5.41593e+06	22.3688		10488127	23.3223		9301443		6.65851e+06	7.97997e+06	22.928														1.41089e+06
RXN20561.1	A0A498MHF6	Aldehyde dehydrogenase family 1 member A3	7.89764e+06	3.49915e+07	61607634	3.48322e+07	25.0539																																										25325720
RXN03819.1	A0A498L6D9	ADP-ribosylation factor 8B	37306448	32131558	320054040	129830682	26.9521		64054655	42423600	471772448	1.9275e+08	27.5222								1.69954e+08	47384223	1.18671e+08	1.12003e+08	26.739		201888810	27.589		8.95993e+07		273527612	1.81563e+08	27.4359		498993336	267529364	4.18548e+07	2.69459e+08	28.0055		48620371	27113458	144649072	73460967	26.1305		64404093	50998428
RXN20623.1	A0A498MLG0	2'-deoxynucleoside 5'-phosphate N-hydrolase 1 (EC 3.2.2.-)	33825216	21673110	268066800	107855042	26.6845				8074558	8074558	22.945																	62591368	51872626	13546548	4.26702e+07	25.3467		53998706	4987941		2.94933e+07	24.8139		68930636		21559992	45245314	25.4313		1.98259e+06	8248629
RXN29434.1	A0A498NC19	Aminoacyl tRNA synthase complex-interacting multifunctional 2-like isoform X2	19473596	7.71505e+06	224239150	8.38093e+07	26.3206		56402079	305688713	1.8333e+08	1.81807e+08	27.4378		60573352			60573352	25.8522		4.14794e+08	52270290	3.37907e+08	2.68324e+08	27.9994		139992836	27.0608		33576449	67330422	8.57012e+07	6.22027e+07	25.8905		288067780	649034942	136269406	3.57791e+08	28.4145		20159470	11121677	38526380	2.32692e+07	24.4719		81745312	52857318
RXN34591.1	A0A498NRY0	Epidermal growth factor receptor substrate 15-like isoform X1		21548130	98122968	59835549	25.8345		9.04724e+08	6655343	1.45888e+09	7.90087e+08	29.5574		113418684		120711684	117065184	26.8027		164445476	594957905	462982141	4.07462e+08	28.6021		272702630	28.0228		35240058	85792735	16315369	4.57827e+07	25.4483				76180320	76180320	26.1829		40710092		128479049	8.45946e+07	26.3341		4.17806e+06	1.08091e+08
RXN29171.1	A0A498N8E5	Ubiquitin-conjugating enzyme E2 D2	210406832	57133132	693115820	3.20219e+08	28.2545		9.05367e+07		312925388	2.01731e+08	27.5879				14741995	14741995	23.8134		9.38969e+07	35951488	29572942	5.31404e+07	25.6633		393031735	28.5501		32579651		73827637	53203644	25.665		672531984	330586376	109383128	3.70834e+08	28.4662		108496592	83199404		95847998	26.5142		4.67237e+06	136809532
RXN32065.1	A0A498NJQ5	Macrophage-capping-like protein	153758336	178384804	58337892	130160344	26.9557		31201668		29757754	30479711	24.8613		174518656		441865664	308192160	28.1993								251033182	27.9033		232405336	544578060	338233920	3.71739e+08	28.4697		21247294		16094218	18670756	24.1543				112147080	112147080	26.7408		105482032	76589277
RXN06372.1	A0A498MAC1	Alpha cardiac	4.08144e+12	1.18601e+12		2.63372e+12	41.2602				37144667745	37144667745	35.1124		3.01652e+11		751663546001	5.26658e+11	38.9381													5.62188e+11	5.62188e+11	39.0323			476940018		476940018	28.8292
RXN29977.1	A0A498NFD8	Collagen alpha-3(VI) chain-like protein	50506590		56815068	53660829	25.6774								229214008	126605172	558195152	304671444	28.1827																	25920398		104520388	65220393	25.9588									43658368
RXN21940.1	A0A498MNR6	Alpha cardiac muscle 1-like protein	564168560		4032469630	2298319095	31.0979		9877121127		562618355	5219869741	32.2814		8137494728		40610703320	24374099024	34.5046				13000159	13000159	23.632		88702880	26.4025		7.61835e+09	23275028367	3302448030	1.13986e+10	33.4081		21387422922		1176717926	11282070424	33.3933		525659484	602956036	2105926259	1078180593	30.006		1.5928e+09
RXN25095.1	A0A498N839	Calponin	3.0391e+11		3.37618e+11	3.20764e+11	38.2227								30237542			30237542	24.8498								41063996	25.2914		4.3373e+08		255607185	3.44669e+08	28.3606		5.89299e+09		54195717725	3.00444e+10	34.8064									4.71724e+09
RXN29259.1	A0A498N4E9	Tubulin beta-4B chain	18771361934		5079792382	11925577158	33.4733		45011306458	9158746112	85137390930	46435814500	35.4345		29930156760	2655800166	29099202158	2.05617e+10	34.2592		3.68789e+10	8693228917	5.28934e+10	3.28218e+10	34.9339		755085392	29.4921		2846224632	6058140318	3780413419	4.22826e+09	31.9774		3947640632		3418612240	3683126436	31.7783		1517985236	5127237096	7749399065	4.79821e+09	32.1598		825596416	3753380660
RXN15487.1	A0A498MEP5	Filamin-C-like isoform X1	39138325		99143222	6.91408e+07	26.043		134943499	25373248	145702625	1.02006e+08	26.6041								2.68853e+06			2.68853e+06	21.3584					102140920	3.87071e+06	8.32002e+06	3.81106e+07	25.1837		959327647	10507555	1.45977e+09	8.09867e+08	29.5931		5.10877e+07	1113004498	2.19317e+08	4.61136e+08	28.7806			36067349
RXN08536.1	A0A498LNA1	Glutathione S-transferase Mu 3-like protein	4.31359e+09	1402702339		2.85814e+09	31.4124			5199640465	4757831314	4.97874e+09	32.2131			395827588	407393672	401610630	28.5812											536545558			536545558	28.9991				3726204416	3726204416	31.7951			2033720912		2033720912	30.9215		1.04738e+09
RXN29767.1	A0A498NFA7	Serine/threonine-protein phosphatase (EC 3.1.3.16)	980754020		1241312376	1111033198	30.0493		1.95954e+09	4.99065e+08	4.65265e+09	2.37042e+09	31.1425			39116496		39116496	25.2213		15029136	8.98821e+06	127846244	5.06212e+07	25.5932		492565500	28.8757		279002353	133263035	786788537	3.99685e+08	28.5743		2767749537	370558305	2865036330	2001114724	30.8982		447361368	1.12537e+08	1383408764	6.47769e+08	29.2709		497970321	165399655
RXN07675.1	A0A498LQN4	Serpin H1-like protein	4.13176e+08		703391412	5.58284e+08	29.0564																																										6618717
RXN24566.1	A0A498N1Z6	Type I cytoskeletal 19-like protein	6.9759e+08		1168934176	9.33262e+08	29.7977			479205466		479205466	28.8361								8.98546e+08			8.98546e+08	29.743																		5.2521e+09		5.2521e+09	32.2902
RXN21078.1	A0A498MID9	Chymotrypsin A-like protein	1423012532		148089044	785550788	29.5491																				653316416	29.2832								53583976596	388885248	67130525952	40367795932	35.2325
RXN02670.1	A0A498L2K9	Laminin subunit beta-2-like isoform X1	2.05593e+08		3.44209e+08	2.74901e+08	28.0343																							15669620	14591178	17557191	1.59393e+07	23.9261									72294365		72294365	26.1074		24688187
RXN32438.1	A0A498NKU9	14-3-3 gamma-B	918808870		1269171784	1093990327	30.027		2.125e+09		306133080	1.21557e+09	30.179																							79728996		341073547	2.10401e+08	27.6486
RXN17026.1	A0A498MD47	N(G),N(G)-dimethylarginine dimethylaminohydrolase 2-like protein	1375925166		1044780248	1210352707	30.1728			37813120	88191954	63002537	25.9089		38817268			38817268	25.2102				10630695	10630695	23.3417		31020072	24.8867			8241004		8241004	22.9744															3.51166e+08
RXN32975.1	A0A498LQB7	Alpha-actinin-1 isoform X5	334330165		962061480	6.48196e+08	29.2719		52560145			52560145	25.6475		136050112		983155478	559602795	29.0598		1.84843e+07			1.84843e+07	24.1398						113001508	362653672	237827590	27.8253		756762720	30206134	1598144164	7.95038e+08	29.5664		7957637400	4.68092e+10	13503006593	2.27566e+10	34.4056			582668210
RXN17041.1	A0A498M8K9	Glutathione S-transferase A-like protein	602538297		15964633046	8.28359e+09	32.9476		446102060		18062758990	9254430525	33.1075				23995098	23995098	24.5162		3.66521e+09	1.99974e+09	1794809898	2.48659e+09	31.2115					2707652984		1477229855	2.09244e+09	30.9625		11514640342	479968	27741516608	1.30855e+10	33.6073		3706282612	6406744262	7044252638	5.71909e+09	32.4131		2.60609e+10	41946801
RXN24563.1	A0A498MXJ4	Myosin-10-like isoform X6			109886302	109886302	26.7114		1.82101e+09	40872346	1.5246e+09	1.12883e+09	30.0722			35698592	15643274	25670933	24.6136											49116173		30355701	39735937	25.2439										42128788	42128788	25.3283
RXN09043.1	A0A498LN73	Phosphoglycerate mutase (EC 5.4.2.11) (EC 5.4.2.4)	3037680486		3673984728	3355832607	31.644		1.54241e+10	8954110325	3.48407e+10	19739642516	34.2004		2017721590	1183290497	1647560984	1.61619e+09	30.59		6.46011e+08	1073508112	1.01251e+09	9.10675e+08	29.7624		673943488	29.3281		3.98905e+08	153933092	284815309	2.79218e+08	28.0568		130692288		1727410137	9.29051e+08	29.7912		1.9283e+09	564509822	493950013	9.95586e+08	29.891		6.72808e+08	89845273
RXN21317.1	A0A498MXB4	14-3-3 eta	5.17905e+08		1076379952	7.97143e+08	29.5703		4.12146e+09	4452916043	5407127365	4.6605e+09	32.1178		411282976	2.27197e+08	185294668	2.74592e+08	28.0327		55031352	7.59584e+06	6.18708e+07	41499334	25.3066		9867147	23.2342		89686049	427789602	272084155	263186602	27.9715		1.31916e+09		1.86771e+08	7.52964e+08	29.488		110027447	278803184	115095928	1.67976e+08	27.3237		3.46089e+08	665423185
RXN17711.1	A0A498MA84	Aldose reductase-like protein	512164111		5173430558	2.8428e+09	31.4047		1877318238		6054850441	3.96608e+09	31.8851		36553200		51714920	44134060	25.3954		465787159	36652671	117577320	2.06672e+08	27.6228					100469440	84665105	1145359930	4.43498e+08	28.7244		3053571896		3245212646	3149392271	31.5524		1.67453e+09	63172228	1802978026	1.18023e+09	30.1364		132117700	80070196
RXN35010.1	A0A498NSD4	Complement C3-like protein	7.56401e+07		2.11346e+07	4.83873e+07	25.5281		1.88545e+09		4637213888	3.26133e+09	31.6028		2617311393	293058011	9.66515e+09	4.19184e+09	31.9649								1201225159	30.1619		336550256	1.57146e+09	4.03056e+08	7.70357e+08	29.521		3.2655e+07		5.73597e+08	303126011	28.1753		4.45116e+10	2.21063e+09	38148316062	2.82902e+10	34.7196		1.29691e+09	8290507853
RXN23746.1	A0A498MZR8	Intelectin 2	763432628		789656423	7.76545e+08	29.5325		93322138		4.22406e+08	2.57864e+08	27.942		14323575	15748685	31443982	20505414	24.2895			5.56693e+07	4.55207e+07	50595021	25.5925		524434495	28.9662		70093022	116999600		93546311	26.4792		256646920		228081707	2.42364e+08	27.8526		116992848458	496155628	1.30476e+11	8.26551e+10	36.2664		176231386	1.6794e+10
RXN23573.1	A0A498MUR7	Transketolase-like protein	2.49898e+08	1.21632e+09		733109219	29.4495			479794846		479794846	28.8378			509130729		509130729	28.9235																		205439446	8.89569e+09	4.55056e+09	32.0834		1099462017	597181113		848321565	29.66
RXN03747.1	A0A498LDA5	Type II cytoskeletal 8	152586464		8774924	80680694	26.2657		205445816		344075512	274760664	28.0336		1173709324	513003160	1295452344	9.94055e+08	29.8888		39604228	135233864	1.32877e+08	1.02572e+08	26.6121		164389822	27.2925		4247657033	3493477759	2381198108	3.37411e+09	31.6519		439744368	274204446	3496442312	1.40346e+09	30.3863		627742304	310817496	616922568	5.18494e+08	28.9498		1101877584	1281054229
RXN17567.1	A0A498MKR0	Phosphoglycerate mutase (EC 5.4.2.11) (EC 5.4.2.4)	540008900		138517920	339263410	28.3378		1201810590	1925898212	1357083409	1494930737	30.4774		84273248	384098049	596960000	3.5511e+08	28.4037		22493083	124842407	80103072	75812854	26.1759		409806080	28.6104			57641564		57641564	25.7806		5926543776		280522792	3103533284	31.5313		343444200	2379772850	4968826708	2564014586	31.2558		191207593	3.43399e+09
RXN23788.1	A0A498MQG4	14-3-3 epsilon-like protein	141753541		393177476	2.67466e+08	27.9948		357469696	486471397	1055576411	6.33173e+08	29.238																	10488791	6.67166e+07	105151590	6.07857e+07	25.8572		187842274		5506046	96674160	26.5266		32055889	46497142	80460464	5.30045e+07	25.6596		6044396	4.59007e+08
RXN23792.1	A0A498MVY7	Myosin regulatory light chain smooth muscle minor isoform-like protein	297111943		420097240	3.58605e+08	28.4178		1.23129e+07	254898476	24208404	9.71399e+07	26.5336				63287248	63287248	25.9154				4.52707e+06	4.52707e+06	22.1101		327119620	28.2852		1038652839	2594035641	2372153496	2001613992	30.8985			25170330		25170330	24.5852			878711040		878711040	29.7108		274724220
RXN23518.1	A0A498MPS7	Elongation factor 2	1.62083e+07	9741669		1.2975e+07	23.6292		2010978226	473661493	3795737606	2.09346e+09	30.9632		125780278	67311624	1014104584	4.02399e+08	28.5841		15636668			15636668	23.8984					5.17606e+07	3.71678e+07	1.31176e+07	3.40153e+07	25.0197		606254952		8676453	3.07466e+08	28.1959		860236018	7.51476e+08	1077037723	8.9625e+08	29.7393			19389273
RXN13139.1	A0A498LX83	Collagen alpha-2(IV) chain-like protein	730558758		1712723090	1221640924	30.1862		8.95375e+07		40053866	6.47957e+07	25.9494		39600137			39600137	25.239								166301124	27.3092		50549025	59140899	47460032	5.23833e+07	25.6426		2.84416e+08	30580485	268632294	1.94543e+08	27.5355			92793400	18866961	5.58302e+07	25.7345			119670392
RXN31416.1	A0A498NHU9	Collagen alpha-2(V) chain-like protein	372778246		133174204	252976225	27.9144										46129760	46129760	25.4592																			29955946	29955946	24.8363									55053250
RXN24535.1	A0A498N6J8	Puromycin-sensitive aminopeptidase	175416639		383686470	2.79552e+08	28.0585		2.03311e+10		1.45681e+10	17449556846	34.0225			47684480		47684480	25.507		635331375	104547985	602826189	4.47569e+08	28.7375						5.55615e+08		5.55615e+08	29.0495			1.26677e+09	1927638786	1.5972e+09	30.5729			383167199	1313214981	848191090	29.6598		5.62174e+08	437574212
RXN05506.1	RXN05506.1	Immunoglobulin Mu Heavy Chain	897948751		2062576876	1.48026e+09	30.4632		2073636844		2.24843e+09	2.16104e+09	31.0091		1809951780	403572228	8676039108	3629854372	31.7573		7.93509e+07	3.52676e+07	2.80555e+07	4.7558e+07	25.5032		769734838	29.5198		65745474	1237465545	4.41048e+07	4.49105e+08	28.7425		8.48046e+08		2038215351	1.44313e+09	30.4266		1.94593e+11	4.81064e+09	1.32416e+11	1.10607e+11	36.6866			3.14573e+10
RXN16185.1	A0A498MFB9	Supervillin-like isoform X3	8.59494e+07		99917061	9.29332e+07	26.4697														1.3138e+07		25580745	1.93594e+07	24.2065
RXN04829.1	A0A498L9F0	Thrombospondin type-1 domain-containing 4-like protein	1289718870		2687491916	1988605393	30.8891																							35461884			35461884	25.0798
RXN22336.1	A0A498MVV7	Ras-related Rab-7a	598094826		46323788	322209307	28.2634		184855764	164301088	693731407	3.47629e+08	28.373		26965528		56910880	41938204	25.3218		8.72823e+08	4.74377e+08	5.49951e+08	6.32384e+08	29.2362		26264746	24.6466		1474240702		46059888	760150295	29.5017		1583206396	256054160	408823252	7.49361e+08	29.4811			19780210	65635672	42707941	25.348		6.34137e+08	803483563
RXN34966.1	A0A498NTH7	Heat shock HSP 90-alpha	477684972		1207141082	842413027	29.65		10611202555	1445975177	12391507391	8.14956e+09	32.9241		2283960830	844265913	10866099133	4664775292	32.1192		4.14632e+09	2.86557e+08	1.49893e+09	1.97727e+09	30.8809		3206031250	31.5781		2295480024	2.54156e+09	1.44209e+09	2.09304e+09	30.963		13465847566	9.67711e+08	2515702588	5.64975e+09	32.3955		3855895529	24594296	5082998332	2.98783e+09	31.4765		2.11375e+09	6574094615
RXN32153.1	A0A498NJV9	Calcium-binding 39-like protein	484821989		297803320	3.91313e+08	28.5437		2.43793e+08	85469862	9.03783e+08	4.11015e+08	28.6146		11307075			11307075	23.4307				5190064	5190064	22.3073		777497892	29.5343		63774765	358189818	126319150	1.82761e+08	27.4454		10364337		70930496	4.06474e+07	25.2767		91554286		208964230	150259258	27.1629		92225487	32172344
RXN27454.1	A0A498N6Z6	6-phosphogluconolactonase (6PGL) (EC 3.1.1.31)	286182152		295553974	290868063	28.1158			752616094	2.88889e+08	5.20753e+08	28.956		13075458		15545419	1.43104e+07	23.7706			35061751		35061751	25.0634		2.21342e+08	27.7217		148416302	8.16067e+07	28943782	8.63223e+07	26.3632		22282536		457503112	239892824	27.8378			196904242		196904242	27.5529		143610714	50425813
RXN30347.1	A0A498NFL2	Brevican core-like protein	514269492		1326456190	920362841	29.7776		1038542429	209335416	7.65198e+08	6.71025e+08	29.3218																															65452869	65452869	25.964
RXN39595.1	A0A498LMH4	Ras-related Rab-1A	1472290408		328309152	900299780	29.7458		2.99079e+08		5.34036e+09	2819717701	31.3929				45500272	45500272	25.4394		33675294		17603116	25639205	24.6118					26000370	1508300579	11453641	515251530	28.9407		377509440		1254710150	816109795	29.6042		41388984		1950347566	995868275	29.8914			9.42838e+08
RXN26780.1	A0A498N148	Heterogeneous nuclear ribonucleo A0-like protein	6.19543e+08		505287092	5.62415e+08	29.0671		4.48504e+08	345613446	2.2e+09	9.9804e+08	29.8945		189290098	115093112	199888448	1.68091e+08	27.3247		192066186	2.9938e+08	4.92599e+08	3.28015e+08	28.2892		412914362	28.6213		1.34891e+09	780653255	909688784	1.01309e+09	29.9161		2.69862e+08		8.99128e+08	5.84495e+08	29.1226		491600488	175592864	1.21429e+09	6.27162e+08	29.2243		5.1931e+08	176481144
RXN33147.1	A0A498NNQ6	60S ribosomal L3	322586616		585682112	454134364	28.7585		3.86788e+08	51242948	1378894904	6.05642e+08	29.1739		81794601		132220444	1.07008e+08	26.6731		3635466543	1.79542e+09	4.41705e+09	3.28264e+09	31.6122		64088562	25.9336		1066125898	1489005009	6.60724e+08	1.07195e+09	29.9976		1388988509	66527404	1283841912	913119275	29.7662		54318384	102332841	901647457	3.52766e+08	28.3941		1341495975	451164337
RXN31354.1	A0A498MK55	Ras-related Ral-B	233170820		514513280	373842050	28.4779		1.67959e+09	528994772	3.54129e+09	1.91663e+09	30.8359		34624668		117036530	75830599	26.1763		6.69831e+06	5532919		6.11561e+06	22.5441		88741544	26.4031		45565946	92713287	342729632	1.60336e+08	27.2565		489111440		137304782	313208111	28.2225		393341572	868545651	807122855	689670026	29.3613		355080899	3.44531e+08
RXN32777.1	A0A498NMM5	Proteasome activator complex subunit 2	287972288		575070564	431521426	28.6849			23423540	3.16962e+06	1.32966e+07	23.6646														1343790908	30.3237		407091168	1.12603e+09	689150086	7.40759e+08	29.4644		1419663054	77847048	1423516285	9.73675e+08	29.8589		835993685	216295942	1010746813	6.87679e+08	29.3572		735013849	306381970
RXN30108.1	A0A498N6P7	Histone H1-like protein	198419355		452132286	3.25276e+08	28.2771		709761721	611241616	3321013829	1.54734e+09	30.5271		25078924	3.23047e+07		2.86918e+07	24.7741		2.72687e+07		30150822	2.87097e+07	24.775		201881598	27.5889		1762172069	1.47342e+09	7976507010	3.73737e+09	31.7994		4160151926		157548656	2158850291	31.0076		6405598664	460276339	58667753711	2.18445e+10	34.3466		1.77799e+09	2.14312e+09
RXN12631.1	A0A498LWN1	Phosphoinositide phospholipase C (EC 3.1.4.11)	975368216		1497053851	1.23621e+09	30.2033		1.7651e+10	17282205184	19771888967	1.8235e+10	34.086		36922712		465552378	251237545	27.9045																	35655669071	31373914	14451157394	1.67127e+10	33.9602		114597177		2159375093	1136986135	30.0826			1.60852e+09
RXN08984.1	A0A498LQJ3	Dihydropyrimidinase-related 2 isoform X1			92019313	92019313	26.4554		2.23743e+10	4617133325	2.56073e+10	1.75329e+10	34.0293		4948033522	357212262	9553271892	4.95284e+09	32.2056											41017480	1.08899e+08		7.49582e+07	26.1596		10651182		15860914	13256048	23.6601		222697752		916826555	5.69762e+08	29.0858			107183355
RXN21833.1	A0A498MPV4	Pentaxin (Pentraxin)	406697192		520550264	463623728	28.7884		794592637		1515334924	1.15496e+09	30.1052		161270378			161270378	27.2649			439571626	56409100	247990363	27.8857		60047148	25.8396			20114642		20114642	24.2617		52824632		207448712	130136672	26.9555		18997656332	1765163538	18537346503	1.31001e+10	33.6089		80575028	1811424166
RXN18324.1	A0A498MG21	60S ribosomal L4	192913004		300895863	2.46904e+08	27.8794		1310009796	823826704	2.10669e+09	1.41351e+09	30.3966		39323940	30819769	106458608	58867439	25.811		7.41386e+09	4.15299e+09	8.47419e+09	6.68035e+09	32.6373		8.26726e+08	29.6228		2.00421e+09	2.51065e+09	1069920485	1.86159e+09	30.7939		9.25517e+08		1.12365e+09	1.02458e+09	29.9324		189676520	172439410	1814558694	725558208	29.4345		5.0527e+09	9.86862e+08
RXN31972.1	A0A498NJ76	Cellular nucleic acid-binding-like protein	711042172		782362902	746702537	29.476		6.41641e+08		1152647805	8.97144e+08	29.7408				104748675	104748675	26.6424		15595896	223428252	5.40838e+07	9.77026e+07	26.5419					323398581	142024131	227632770	231018494	27.7834		249963750	25305850	966474729	4.13915e+08	28.6248		1166016340		1074409351	1.12021e+09	30.0611			47583020
RXN38294.1	A0A498P430	Alpha-1,4 glucan phosphorylase (EC 2.4.1.1)	34918633		23646148	2.92824e+07	24.8035		4.94186e+09	2.43291e+08	4.2415e+09	3.14222e+09	31.5491		29846144		748178398	389012271	28.5352		204272644	3.18016e+06	78806074	9.54196e+07	26.5078		2.39626e+08	27.8362		116925331	245083347	32098347	1.31369e+08	26.969		1.94309e+08	2.56432e+07	624142117	2.81365e+08	28.0679		1698121042	1218805630	2571424368	1.82945e+09	30.7688		4.69001e+08	6.96403e+08
RXN19025.1	A0A498MPM1	Beta-1,4-glucuronyltransferase 1	2.1934e+08		205984664	2.12662e+08	27.664				14858636	14858636	23.8248														76263230	26.1845		285634507	33077265	96296833	1.38336e+08	27.0436				17237760	17237760	24.0391									27901518
RXN17082.1	A0A498MCC2	Ceramide synthase 2-like protein	4814815040		15212677356	10013746198	33.2213								1350954104	1019668028	3310158470	1893593534	30.8185								249647168	27.8953			7.20437e+09		7.20437e+09	32.7462			3.30957e+09		3.30957e+09	31.624		16674484194	7.79434e+09	30763401930	1.84107e+10	34.0998			7004753469
RXN23093.1	A0A498MTB3	Cell division control 42-like protein	969909414		3200796678	2085353046	30.9576		1328224900		1675579142	1501902021	30.4841								80457682			80457682	26.2617		95563352	26.51		3.15318e+08	96154049	368151793	2.59875e+08	27.9532		1541066926	46480052	694277617	7.60608e+08	29.5026		92199256	219037392	340326409	2.17188e+08	27.6944		141919784	390048970
RXN29176.1	A0A498ND90	Transcriptional activator Pur-alpha-like protein	221293472		258612019	2.39953e+08	27.8382		821651641	89621544	2119157058	1.01014e+09	29.9119		37673840			37673840	25.1671													27262920	27262920	24.7004								24963179		1.48447e+08	8.67049e+07	26.3696			7885671
RXN26406.1	A0A498N751	Peptidase inhibitor 15	1055342526		1277624030	1166483278	30.1195
RXN02429.1	A0A498L2I3	Histone	31455637474		59090632265	4.52731e+10	35.3979				1.17137e+11	1.17137e+11	36.7694		72403320		2386259248	1229331284	30.1952											48893852		240412064	144652958	27.108		73515044092		40075596240	56795320166	35.7251				481539501542	481539501542	38.8089			6.68485e+10
RXN10753.1	A0A498LT27	26S proteasome non-ATPase regulatory subunit 14	234625134		391500446	313062790	28.2219		4.28201e+08	291593944	737964636	4.8592e+08	28.8561		42570651	43939864	36015188	40841901	25.2835		2.44981e+08	83289118	631081357	3.19784e+08	28.2525		3.11051e+08	28.2126		107491688	202587398	240030320	183369802	27.4502		240791528	14937022	53955898	1.03228e+08	26.6213		436819346	40594634		238706990	27.8307		100543763	91875008
RXN22390.1	A0A498MPW5	Cysteine-rich 2-like protein	1440332056		456344341	9.48338e+08	29.8208				18963262	18963262	24.1767																									24925868	24925868	24.5711									5.77917e+06
RXN12220.1	A0A498LVN3	Aflatoxin B1 aldehyde reductase member 4-like protein	537678704		237481088	387579896	28.5299		3.09523e+08	2.21352e+08	7.8111e+08	4.37328e+08	28.7041			20666954		20666954	24.3008		6.30901e+07	4.75868e+07	1.24082e+08	7.82531e+07	26.2216		156595172	27.2225		44585161	5.24237e+07	76945544	5.79848e+07	25.7892		5.11364e+08	12794716	486084977	3.36748e+08	28.3271		141276124	371064785	697117165	4.03153e+08	28.5868		1.55023e+09	298354409
RXN14902.1	A0A498M6I7	Microtubule-associated protein	6.59283e+07		3.08914e+07	4.84098e+07	25.5288		1.5076e+09	9454771	1.45757e+09	9.91543e+08	29.8851		237335418	72858672	582894242	2.97696e+08	28.1493				2.55621e+06	2.55621e+06	21.2856		35317888	25.0739								3.05242e+07		5.90757e+07	4.48e+07	25.417			45056212	2.98062e+08	1.71559e+08	27.3541		10524414	6.56992e+07
RXN21836.1	A0A498MUC0	Pentraxin fusion-like protein	600094462		2263997171	1.43205e+09	30.4154		1189268240		141756596	665512418	29.3099			42179472	889591860	465885666	28.7954		858066873	1.65976e+10	69799059456	2.90849e+10	34.7596					2417474835	2.07374e+09	3476049392	2.65576e+09	31.3065		511008473		2.0632e+09	1.28711e+09	30.2615		282607720		52699466	167653593	27.3209		2.2895e+06	3.19286e+09
RXN23695.1	A0A498N4A4	Histone H1-like protein	53560612		256875306	155217959	27.2097		982755145	52633920	2398979512	1.14479e+09	30.0924			403299723		403299723	28.5873		31015929	5.87378e+06	2.33261e+08	9.00503e+07	26.4242		258397520	27.945		1.09063e+09	3.52032e+08	2.53497e+09	1.32587e+09	30.3043		93498120		1006905022	550201571	29.0354		12870833638	204911880	2.54425e+10	1.28394e+10	33.5799		935172339	811302474
RXN35269.1	A0A498NUJ4	Sorbin and SH3 domain-containing 2-like protein	80138473		102310430	9.12245e+07	26.4429																																										9266449
RXN35535.1	A0A498NU78	Plasminogen activator inhibitor 1 RNA-binding-like isoform X1	35840036		1.44273e+08	9.00566e+07	26.4243		9.95193e+07		34634935	6.70771e+07	25.9993		1.53345e+08		270849166	2.12097e+08	27.6601		18175939	8.0904e+07	166247587	8.84425e+07	26.3982					1.38865e+07	46949992	1.91997e+07	2.66788e+07	24.6692								18696942	112158663	74783230	6.85463e+07	26.0306		78105484	1.42115e+08
RXN35347.1	A0A498NV44	Plastin-1			10393638	10393638	23.3092																													3.35464e+08	201735834	1570299697	7.025e+08	29.3879								49394272
RXN13137.1	A0A498M7H1	Collagen alpha-1(IV) chain	263743741		1042815333	653279537	29.2831		112746943		27161310	6.99541e+07	26.0599								1.35535e+06	13088347		7.22185e+06	22.7839					140318784	17272137	2.60921e+07	6.12277e+07	25.8677		383495986		284518423	3.34007e+08	28.3153			117840107	5.86836e+06	6.18542e+07	25.8824		44399346	3.26604e+08
RXN26943.1	A0A498N416	Phosphoglycerate mutase (EC 5.4.2.11) (EC 5.4.2.4)	226174688		400476760	313325724	28.2231		5.05189e+08	223234700	7.91164e+06	2.45445e+08	27.8708		646366268	355770642	862472300	6.21536e+08	29.2113											1.94922e+09	4.29928e+08	1537708870	1305617362	30.2821			3.56476e+06	4718727390	2.36115e+09	31.1368		3548671409	4127822865	8573885866	5416793380	32.3348		1.19421e+07	14931751
RXN38970.1	A0A498P2U5	Glycogenin-1-like isoform X2	58584597		196293355	127438976	26.9252		5.3922e+07	11964399	81790537	4.92256e+07	25.5529				21481780	21481780	24.3566		2.32672e+07	9.89994e+06	10405658	1.45243e+07	23.792					83089338	123333521	67497231	9.13067e+07	26.4442		213413998		200677289	2.07046e+08	27.6254			9.12399e+07	54982484	7.31112e+07	26.1236		110598779	7.30265e+07
RXN14299.1	A0A498NE56	cAMP-dependent kinase catalytic subunit beta isoform X2	121501266		190582953	1.56042e+08	27.2174		130012672		207689140	168850906	27.3312								6.09938e+07		172741296	1.16868e+08	26.8003		36793120	25.1329								1312236594		954411272	1133323933	30.0779		473769724		1282399421	8.78085e+08	29.7098
RXN24118.1	A0A498MRB6	Cellular nucleic acid-binding-like protein	65044764		86318175	7.56815e+07	26.1734		4.52358e+07		93397130	6.93165e+07	26.0467								161612156	151207378	48575762	1.20465e+08	26.844					54498484		141984681	9.82416e+07	26.5498		5613150		2.59293e+08	1.32453e+08	26.9809		183215068		202627342	192921205	27.5234			6991275
RXN07355.1	A0A498LPR7	Sushi repeat-containing SRPX2	113581432		477266360	295423896	28.1382								62552144		312681004	187616574	27.4832								193850191	27.5304										25374010	25374010	24.5968									79877605
RXN37372.1	A0A498NTT7	Ras-related Rab-18	201028066		114952308	157990187	27.2353		115659809	373352294	2.43996e+08	2.44336e+08	27.8643																	39434536	3.54037e+07	307254888	1.27364e+08	26.9244		136977054			136977054	27.0294		470797492		493804006	482300749	28.8454		123822629	9217894
RXN18450.1	A0A498ME61	Transforming isoform X3	266434856	81868704		174151780	27.3758		528580472	466762409	1041870469	6.79071e+08	29.339								10692469			10692469	23.3501		312717344	28.2203		324286108	1.69977e+08	28271764	1.74178e+08	27.376		584042812	51171908	142072646	2.59096e+08	27.9489		45480316	383001470		214240893	27.6747		3.15037e+07	19908336
RXN12548.1	A0A498LVP1	Alpha-1,3-mannosyl-glyco 4-beta-N-acetylglucosaminyltransferase B-like protein	356570522		476860544	416715533	28.6345			79121160	16357792	47739476	25.5087		43637954		4.58353e+06	2.41107e+07	24.5232								200955302	27.5823		14258909	136235812		7.52474e+07	26.1651		135750412		72933200	104341806	26.6367		4676647874	572118306	2157921338	2.4689e+09	31.2012		57679290	2032795459
RXN24921.1	A0A498MWS4	Putative peptidyl-tRNA hydrolase 2	89310088		562271784	325790936	28.2794		84948916	268072176	160413762	1.71145e+08	27.3506														36301852	25.1135		103219504	91637256	66237608	87031456	26.375		79219254			79219254	26.2393		50054284	146231700	46825584	8.10372e+07	26.2721		10545278	28501902
RXN31709.1	A0A498NIU6	Protein disulfide-isomerase (EC 5.3.4.1)	3.3679e+07		142198862	8.79389e+07	26.39		201791198		196503212	199147205	27.5693		152199700		231310595	1.91755e+08	27.5147		2.57433e+08	2.7381e+08	5.35155e+08	3.55466e+08	28.4051		68784692	26.0356		6.13332e+07	67770275	16309299	4.84709e+07	25.5306		2977830		2.26962e+06	2.62373e+06	21.3232			36281891	8.22043e+06	2.22512e+07	24.4074		6861491	31141536
RXN10698.1	A0A498LQJ5	Lissencephaly-1 homolog	51066542	33374060		42220301	25.3314		265799079	97380441	285098573	2.16093e+08	27.6871				64313826	64313826	25.9386			6.01287e+06	4.40913e+07	2.50521e+07	24.5784		33536972	24.9992		12063805	76608843		44336324	25.402		56401477	7013933	78509139	47308183	25.4956			21809551		21809551	24.3785		13941202	7.9204e+06
RXN26392.1	A0A498N3J9	Voltage-dependent anion-selective channel 2-like isoform X2	55487808		65601176	60544492	25.8515		4.86794e+08	895109399	9.03458e+08	761787315	29.5048		359681832	321034296	575826752	4.18848e+08	28.6419		4694752		1.63232e+07	1.0509e+07	23.3251		7.09161e+08	29.4015		1.50877e+08	80256864	306366864	1.79167e+08	27.4167		184864704		101979330	143422017	27.0957		386709734	1933442821	1209566794	1.17657e+09	30.1319		7.04157e+08
RXN29836.1	A0A498NE24	Serine protease HTRA1A-like protein	35837918		5.11791e+07	4.35085e+07	25.3748
RXN07007.1	A0A498LN76	ADP ATP translocase 2	1.34647e+08		5.00269e+07	9.23368e+07	26.4604		367582406			367582406	28.4535																	43696238		2.0205e+08	1.22873e+08	26.8726		1418290760		1984787564	1701539162	30.6642		50192035		176946854	1.13569e+08	26.759			6.99319e+07
RXN27697.1	A0A498NDV2	Annexin	26401272			26401272	24.6541		6904897477	2.16952e+09	9126729594	6.06705e+09	32.4983		214423449	148632360	361437815	2.41498e+08	27.8474											28474510	69990509	155433384	84632801	26.3347		86015242			86015242	26.3581				117357848	117357848	26.8063			856670144
RXN15293.1	RXN15293.1	Membrane-Bound Immunoglobulin	15088547		58635057	36861802	25.1356		146652608		69184240	107918424	26.6854				94178488	94178488	26.4889											251442585		18424929	134933757	27.0077				97980744	97980744	26.546		13903112161		7.0601e+09	1.04816e+10	33.2871			1.91445e+09
RXN33777.1	A0A498NQF9	Radixin isoform X1	337916086	91236153		2.14576e+08	27.6769		3.11778e+08	174815568	3.63828e+08	2.83474e+08	28.0786		89280912	67644320	3.88654e+08	1.8186e+08	27.4383											305160256		290865066	298012661	28.1508		1106316020		452851718	779583869	29.5381		890840651	434182578	1446139181	9.23721e+08	29.7829
RXN06032.1	A0A498LCV7	Glutamine gamma-glutamyltransferase	126799937		3.41646e+08	2.34223e+08	27.8033		3.08311e+08		12862065	1.60587e+08	27.2588		22933038		166508333	9.47207e+07	26.4972											16249023	7.51585e+06		1.18824e+07	23.5023				5640333	5640333	22.4273			26159351	45461571	35810461	25.0939		144582564	2.05396e+07
RXN06197.1	A0A498LKP9	EH domain-containing 3	111010749	10221329		60616039	25.8532		476449537	19461624	487914125	327941762	28.2889																							43499798		86675992	65087895	25.9559
RXN26270.1	A0A498MZL6	Palmitoyl-thioesterase 1-like protein	240726620		210510642	225618631	27.7493		55066364	3.98114e+07	267130280	1.20669e+08	26.8465			13210599		13210599	23.6552				15489766	15489766	23.8848		592820874	29.143		3.11317e+08	450922608	6.53381e+08	471873515	28.8138		170927758		13388621	9.21582e+07	26.4576			76001166		76001166	26.1795		1.18171e+09	57412937
RXN19954.1	A0A498MKT8	PDZ domain-containing GIPC1-like protein	589804180			589804180	29.1357		450333273	277956908	1.51209e+09	7.46793e+08	29.4761														12743719	23.6033		19926734			19926734	24.2482										18395978	18395978	24.1329
RXN36665.1	A0A498NXI8	Sorbin and SH3 domain-containing 2-like protein	45036480		1.89749e+08	1.17393e+08	26.8068																																			35499124	220473534	104486686	1.20153e+08	26.8403			39415358
RXN14285.1	A0A498M9S8	Myosin light chain cardiac muscle-like isoform X1	24775120		176063328	100419224	26.5815								40801848	48136364	141043184	7.66605e+07	26.192											2.18086e+09	9.73426e+09	5063941779	5.65969e+09	32.3981									158008182		158008182	27.2354		147429152
RXN03847.1	A0A498LDL3	RFT1-like protein	538570697		5.72217e+08	5.55394e+08	29.0489																													1.96584e+06			1.96584e+06	20.9067
RXN30782.1	A0A498LFW3	Mitogen-activated protein kinase (EC 2.7.11.24)	16339229		24567016	2.04531e+07	24.2858		1.7775e+09	2.86433e+08	2824709798	1.62955e+09	30.6018		52865496	1.81378e+07	464727612	1.78577e+08	27.412		3.43246e+07		9353897	2.18392e+07	24.3804		112330239	26.7432		28771563	46576160	38044947	3.77976e+07	25.1718		75592104		91173787	8.33829e+07	26.3132				57332220	57332220	25.7728		115803218	148791867
RXN11515.1	A0A498M1G8	Eukaryotic translation initiation factor 4H isoform X3	299673234		25536366	162604800	27.2768		217160013	506357408	704129227	475882216	28.826		16884150		10829434	13856792	23.7241		66669178	56273008	140809959	8.79174e+07	26.3896					3.05009e+07		34259820	3.23804e+07	24.9486		194299456			194299456	27.5337		38373494	52955700	70326674	5.38853e+07	25.6834			4.68403e+07
RXN11253.1	A0A498LUF9	Syndecan binding 2	236712794		304856876	270784835	28.0126		39461429	135446904	2.59371e+08	1.4476e+08	27.1091		73585370	33003106		53294238	25.6675		97544828	41127810	99938728	79537122	26.2451		114105368	26.7658		86952986	83237572	128045400	99411986	26.5669				33169062	33169062	24.9833		32613773		130492137	81552955	26.2812		13807854	212596746
RXN23743.1	A0A498MV71	MICOS complex subunit MIC60 (Mitofilin)	50536302		68909584	59722943	25.8318		5796412796	584154884	5.78098e+09	4.05385e+09	31.9166		825415468	11463938	2991533967	1276137791	30.2491		2823589614	6.84085e+08	2.51461e+09	2.00743e+09	30.9027		427661568	28.6719		3.77432e+08	4.5616e+08	317234468	3.83609e+08	28.5151		257501678		241971646	249736662	27.8958		552275971	5.39942e+09	2.00217e+09	2.65129e+09	31.304		1305347241	2.06604e+08
RXN21561.1	A0A498MKG8	LRR and PYD domains-containing 12	29464256			29464256	24.8125		218030288	9.55194e+07	4.04951e+08	2.395e+08	27.8355				32974190	32974190	24.9748		226809823	11609698	310548804	1.82989e+08	27.4472		138837225	27.0488		99495309	206654534	118116574	141422139	27.0754		21504310			21504310	24.3581		29889642		55208182	42548912	25.3426		2.74456e+07	136570842
RXN28869.1	A0A498N3B1	Ataxin-7-like protein 3 (SAGA-associated factor 11 homolog)	55948228		164285910	110117069	26.7145		6.63663e+08	284997224	1.7748e+09	907819390	29.7578		149090195		644927896	3.97009e+08	28.5646		7.34054e+08	1004432993	1037644904	9.25377e+08	29.7855		148306692	27.144		211933842	4.01988e+08	1.36273e+08	2.50065e+08	27.8977		3.23134e+08	11320029	193356970	1.75937e+08	27.3905		754665720	359618820	780341680	6.31542e+08	29.2343		3.61971e+08	351547678
RXN17265.1	A0A498LNQ2	Autoimmune regulator	43531704		368945424	206238564	27.6197		410086502	205104648	633985360	416392170	28.6334														149728072	27.1578										25215284	25215284	24.5878				61892736	61892736	25.8833		4.83332e+06	304493648
RXN35121.1	A0A498NTA0	Twinfilin-1	28558898		130455384	79507141	26.2446		126947329	206008534	634162829	3.22373e+08	28.2642														138410702	27.0444		470380344	599409930	496659391	5.2215e+08	28.9599		81668544		184503478	133086011	26.9878		44269080	40371212	310800660	1.31814e+08	26.9739		1.7632e+08	111110750
RXN07040.1	A0A498LFT5	Glutaredoxin-3	147648902		125245368	136447135	27.0238		120978190	8.38079e+08	439540322	4.66199e+08	28.7964		65671680			65671680	25.9688		135095084811	1.2858e+11	1.47361e+11	1.37012e+11	36.9955		123710242	26.8824		1.43603e+08	74900826	61983262	9.34957e+07	26.4784		87584630		9770758	48677694	25.5368		64981632	156034421	237672300	1.52896e+08	27.188		5.32966e+07	26795173
RXN34560.1	A0A498NR65	40S ribosomal protein S8	31591212		223267410	127429311	26.9251		611651540	422080518	3787977610	1607236556	30.5819									1.6439e+07	6983028	1.1711e+07	23.4814		15341831	23.871			34848176	36984224	35916200	25.0981		298699710		73990574	186345142	27.4734		33722200	29787154	294483670	119331008	26.8304		1.35457e+09
RXN22607.1	A0A498N1E7	Ester hydrolase C11orf54-like protein	290106048		121160624	205633336	27.6155		35830852		640633220	338232036	28.3334		39364304	14007557		2.66859e+07	24.6696		3.25788e+06	46381408	5.66903e+06	1.84361e+07	24.136		13859175	23.7243			77101304	46951126	62026215	25.8864		60119546			60119546	25.8413		251998379	88149942	602673862	314274061	28.2274		3.59786e+08	50895144
RXN08569.1	A0A498LJP4	Carboxymethylenebutenolidase-like protein	285841372		441495394	363668383	28.438		146302551		304956634	2.2563e+08	27.7494		9677848			9677848	23.2063								1.60278e+09	30.5779		5.06562e+07	1.94064e+07	67949040	4.60039e+07	25.4553		28199460		20399370	24299415	24.5344		18830052		10002088	14416070	23.7812		104753861	31409550
RXN07383.1	A0A498LIJ7	Chloride intracellular channel protein	591118590		345241352	468179971	28.8025		127270692	132806160	1.61861e+08	1.40646e+08	27.0675														5.46028e+08	29.0244		4805046		5.96251e+07	3.22151e+07	24.9412		104470636		118647838	111559237	26.7332		129388712	1274802348	774869293	726353451	29.4361		66142213	5.14526e+07
RXN27047.1	A0A498NCZ9	Neural cell adhesion molecule 1-like isoform X7	17130158	58197086		37663622	25.1667		9233265429	955910033	8.81089e+09	6.33335e+09	32.5603		335813403	116929006	1159395583	5.37379e+08	29.0014		1929162			1929162	20.8795		1.95353e+07	24.2196		65205838	15735251	4.27897e+07	4.12436e+07	25.2977				21255660	21255660	24.3413		9703075		423039440	2.16371e+08	27.6889		1.41161e+08	2.39125e+06
RXN33607.1	A0A498NPY9	Myeloid-associated differentiation marker-like protein	5.03877e+07		10320972	3.03543e+07	24.8554																													117658348			117658348	26.81
RXN15177.1	A0A498MDT9	Palladin isoform X4	248084363		2.4191e+08	2.44997e+08	27.8682																							8588504	16481387	93458206	3.95094e+07	25.2357		508923249	13272173	892168914	4.71455e+08	28.8125									8.538e+07
RXN18585.1	A0A498MN87	Translocon-associated subunit gamma	222689468		261851088	242270278	27.852			37034716	8.01626e+07	5.85987e+07	25.8044								122901672	29607162	11160410	5.45564e+07	25.7012		162139112	27.2727		140918184	45004332	2.52259e+07	7.03828e+07	26.0687		638274868	443069602	359591000	4.80312e+08	28.8394		25661138		42747284	34204211	25.0277		39576112
RXN19723.1	A0A498MIW9	Microsomal glutathione S-transferase 1-like protein	119446556		921970190	520708373	28.9559		43996025		125796034	8.4896e+07	26.3392								11844728	6.0699e+06	15024204	1.09796e+07	23.3883		109019362	26.7		3.10086e+08	62382347	712787855	3.61752e+08	28.4304		734442724	1435034674	1011702951	1.06039e+09	29.982		261045184		474579600	367812392	28.4544		10879474	52387870
RXN27931.1	A0A498N571	Calponin	302425803		131538370	2.16982e+08	27.693				9.72656e+06	9.72656e+06	23.2135				11351507	11351507	23.4364		7165103	3.60488e+07	44368362	2.91941e+07	24.7992		68541852	26.0305			64727061	20233352	4.24802e+07	25.3403															169449871
RXN23482.1	A0A498MV49	Guanine nucleotide-binding G(I) G(S) G(T) subunit beta-2	62239328			62239328	25.8913		695844956	345766501	1216346200	7.52653e+08	29.4874														67113120	26.0001				22822226	22822226	24.4439		841534376			841534376	29.6484				91049056	91049056	26.4401			111142830
RXN20137.1	A0A498MTB0	Troponin fast skeletal muscle-like protein	52225309		550498664	3.01362e+08	28.1669		2.19821e+08	49896284		1.34859e+08	27.0069		805098752	107134351	384391158	432208087	28.6872								60723188	25.8557		5.28139e+09	23140241	9.59834e+09	4.96762e+09	32.2099		23935524		2580518852	1302227188	30.2783								5.57298e+06
RXN30396.1	A0A498NEK6	Endoplasmic reticulum resident 44	1.81387e+07			1.81387e+07	24.1126		981051776	125948866	192315717	433105453	28.6901		74528653		1.97879e+08	1.36204e+08	27.0212		1.81495e+08	2.45804e+08	3.50847e+08	2.59382e+08	27.9505		687201546	29.3562		306328485	577002598	271512407	384947830	28.5201		62995751		343407746	2.03202e+08	27.5983		223074782	48852912	273254816	1.81728e+08	27.4372		432664658	1.94959e+08
RXN20336.1	A0A498MNV1	Uncharacterized protein	69848016		589876852	329862434	28.2973		45697157			45697157	25.4456				318266520	318266520	28.2457		268337680		243120515	2.55729e+08	27.93		466078808	28.796		2.84926e+10	9.14235e+09	3.79472e+10	2.5194e+10	34.5524		261684096	445959849	1063782668	5.90476e+08	29.1373		264609920	62296652	365963384	230956652	27.783		1026071580	51893343
RXN07654.1	A0A498LLS3	Phosphatidylinositol transfer alpha isoform-like protein	146180448		139197248	142688848	27.0883				35594240	35594240	25.0851		198763032	254730208	82597072	1.78697e+08	27.4129		4.43687e+08	1.25978e+08	1193337288	5.87667e+08	29.1304		889403564	29.7283		3.37107e+08	1.89334e+08	194934040	2.40459e+08	27.8412		209319894	117950608	399285744	2.42185e+08	27.8515		158061004	21821358	611105151	2.63663e+08	27.9741		284687896	55500097
RXN13920.1	A0A498M060	Isochorismatase domain-containing 1	336996288		104427824	220712056	27.7176		579436215	231909938	1.20225e+09	6.712e+08	29.3222		20639588			20639588	24.2989								12439056	23.5684		62514325	11007344		3.67608e+07	25.1317		117183020		72614576	94898798	26.4999		115081920		101412898	108247409	26.6898		111159135	29425071
RXN26562.1	A0A498N415	Z-dependent protease inhibitor-like protein	25532074		66525252	46028663	25.456		631212297	2682517478	9.58194e+08	1.42397e+09	30.4073		205501299		163009469	184255384	27.4571			4.1226e+06		4.1226e+06	21.9751						7938478	3.74466e+06	5.84157e+06	22.4779		29376615			29376615	24.8082		12271227	31643905	4.06698e+07	2.8195e+07	24.7489			33590587
RXN23226.1	A0A498MY97	Arp2/3 complex 34 kDa subunit	116949538		818090824	467520181	28.8005		323020009	397793236	1004182978	574998741	29.099		40464625	49993901	52179014	4.75458e+07	25.5028		51437568	13101730	96929010	5.38228e+07	25.6817		6.55015e+08	29.287		494676081	5.76956e+08	612135912	5.61256e+08	29.0641		1.73601e+08	72795768	420343315	2.22247e+08	27.7276		197553786	4.57332e+07	151479288	1.31589e+08	26.9715		767380429	206954958
RXN12533.1	A0A498LYA1	Eukaryotic translation initiation factor 3 subunit I (eIF3i) (Eukaryotic translation initiation factor 3 subunit 2) (eIF-3-beta) (eIF3 p36)	58777912		98339514	78558713	26.2273		140688791	164536402	587314799	2.97513e+08	28.1484		58827896	29490242	50494944	4.6271e+07	25.4636		9.92909e+08	183032287	1.92214e+09	1.03269e+09	29.9438		555584108	29.0494		6.09175e+07	2.03326e+08	147113560	1.37119e+08	27.0309		99557366	7776996	79489108	62274490	25.8921		88176382	63252918	516524486	222651262	27.7302		231193654	2.25025e+07
RXN02723.1	A0A498L5M6	Dual specificity kinase TTK isoform X1			152670080	152670080	27.1858				45955023	45955023	25.4537									3.40625e+06	4.11251e+06	3.75938e+06	21.8421		20583506	24.295		32758222		59269288	46013755	25.4556				3.62348e+07	3.62348e+07	25.1109			82068948		82068948	26.2903		2.16596e+06	25669957
RXN22635.1	A0A498N173	Endothelial differentiation-related factor 1-like protein	78139909		246104108	1.62122e+08	27.2725																				51011538	25.6043		2.85432e+07		34760462	3.16518e+07	24.9158				5.53504e+06	5.53504e+06	22.4002									24598039
RXN32258.1	A0A498NK69	Ras-related Rab-10	67087656		1354137768	710612712	29.4045		1.44088e+09		1836498486	1.63869e+09	30.6099				120653562	120653562	26.8463		61849131	36304822	69831897	5.59953e+07	25.7388		327045404	28.2849		483735056	284003524	2.4725e+09	1.08008e+09	30.0085		416816436		384414717	4.00616e+08	28.5776		215673228		401674442	308673835	28.2015		6534710	476695147
RXN04845.1	A0A498LHE1	Stathmin	235861700		51654460	143758080	27.0991		345129739	742765908	629607953	572501200	29.0927
RXN10532.1	A0A498LS60	Glia maturation factor beta	422751688		97965614	260358651	27.9559		3.68683e+08		7.7124e+08	5.69961e+08	29.0863								7275391	12307274		9.79133e+06	23.2231						119971369	116626093	118298731	26.8179		266749609			266749609	27.9909				95441554	95441554	26.5081			67535902
RXN24964.1	A0A498MZJ1	Ribose-phosphate pyrophosphokinase 1	219898096		344929774	282413935	28.0732		352538029	176598300	1.0007e+09	5.09945e+08	28.9258		57161654	29548238		43354946	25.3697		2.25549e+08	92615392	515461870	2.77875e+08	28.0499					1.2242e+08	116518618	144673712	1.27871e+08	26.9301		406722827	29899032	142810368	1.93144e+08	27.5251		176786408	5.13828e+07	94730864	1.07633e+08	26.6816		2.61616e+08	261374674
RXN32070.1	A0A498NJF9	Pyruvate dehydrogenase E1 component subunit alpha (EC 1.2.4.1)	45212584	72468676		58840630	25.8103		2.15835e+09	4346258140	6.59375e+09	4.36612e+09	32.0237		14405344		450377405	2.32391e+08	27.792		5.00532e+08	1.03824e+09	1386224410	9.74997e+08	29.8608		1422245391	30.4055		3.47158e+08	360233030	4.96407e+08	4.01266e+08	28.58		1.33707e+08	21387884	8.25346e+08	3.26814e+08	28.2839		724405059	7102180140	1.51265e+09	3.11308e+09	31.5357		4450308825	120324309
RXN08660.1	A0A498LKB6	Proteasome subunit beta (EC 3.4.25.1)	91031754		35081235	6.30565e+07	25.9101		1.80849e+08		8.2016e+08	5.00504e+08	28.8988								180452804	3.99201e+08	1.90029e+08	2.56561e+08	27.9347																	11810406	151659346	21553447	6.16744e+07	25.8782			11346569
RXN34654.1	A0A498NT14	Acyl-coenzyme A thioesterase mitochondrial-like isoform X2	103825502		11875507	5.78505e+07	25.7858		1.84634e+08	42120444	371395406	1.99383e+08	27.571								6.73826e+06	1.70027e+07	5.79696e+07	2.72369e+07	24.6991		183935745	27.4546		2.18451e+07	38775160	10115012	2.35784e+07	24.491		48692560		8962965	2.88278e+07	24.781			47855020	38762048	43308534	25.3681		6318996	14520638
RXN21546.1	A0A498MT32	Prostaglandin reductase 1-like protein	139098324		197207592	168152958	27.3252		58087217	483170154	502053811	347770394	28.3736		22915724			22915724	24.4498		153496345	7.96372e+07	3.33342e+08	1.88825e+08	27.4925		106829864	26.6707		83067603	111344962	13559789	69324118	26.0469		732035494	1083009502	1125680783	9.80242e+08	29.8686		106568982		109615292	108092137	26.6877		1463318408	68348930
RXN12401.1	A0A498LVZ1	Ankyrin repeat and SOCS box 13-like protein	67399536	178080268		122739902	26.871		43767268	75164232	110049865	7.63271e+07	26.1857														95170672	26.504			127270528	127688440	127479484	26.9257		160215768			160215768	27.2554			15913362		15913362	23.9237
RXN09128.1	A0A498LL42	Nephronectin-like isoform X1	78447960		213210080	145829020	27.1197
RXN26081.1	A0A498LIT6	Adenylate kinase 2, mitochondrial (AK 2) (EC 2.7.4.3) (ATP-AMP transphosphorylase 2) (ATP:AMP phosphotransferase) (Adenylate monophosphate kinase)	108385244		40125456	74255350	26.146		3.34128e+07	237326292	218008796	1.62916e+08	27.2796			34731720		34731720	25.0498		1.52062e+08	2.5717e+08	2.68887e+08	2.2604e+08	27.752		479119268	28.8358		331299347	154147409	139187217	2.08211e+08	27.6335		110551670	15800298	3.84986e+08	1.70446e+08	27.3447			171934318	31248212	101591265	26.5982		1.44165e+08	67612704
RXN10062.1	A0A498LQP8	Low molecular weight phosphotyrosine phosphatase isoform X1	483788560	170167424		326977992	28.2846			39611764	29768536	34690150	25.048														754100696	29.4902		241134953	97214823	58478208	1.32276e+08	26.979				72086402	72086402	26.1032			74346416		74346416	26.1478		6.62574e+07	42406288
RXN17000.1	A0A498M9B4	26S proteasome non-ATPase regulatory subunit 3	22899168	1.30845e+07		1.79918e+07	24.1008		1.16092e+09	21827372	1.70295e+09	9.619e+08	29.8413		158467855		709781950	4.34125e+08	28.6935		562027268	2.66752e+08	1118304109	6.49028e+08	29.2737		708680395	29.4006		1.59971e+08	2.40888e+08	73454195	1.58104e+08	27.2363		574673574	364009173	315217548	417966765	28.6388		519803132	2.40676e+08	420849840	3.93776e+08	28.5528		4.07823e+08	2.71939e+08
RXN04022.1	A0A498L6Y2	Huntingtin-interacting 1-like protein	2.16771e+07		15141413	1.84092e+07	24.1339		105728075	10305909	1.95547e+08	1.0386e+08	26.6301														30024574	24.8396		2.99848e+07		18118215	2.40515e+07	24.5196															4.45355e+06
RXN32902.1	A0A498NLR3	Caytaxin-like isoform X1	191980012		567509892	379744952	28.5005				95376194	95376194	26.5071																	46129060	3.45498e+07	141140254	7.39397e+07	26.1398		111422996		75218352	93320674	26.4757		18397332			18397332	24.133			5500232
RXN11358.1	A0A498LSC6	Epididymal secretory E1	154768772		38948052	96858412	26.5294		74675456		83545908	79110682	26.2374														12778209	23.6072		106321888	19360356	80055988	6.85794e+07	26.0313		514908232	35033736	114864586	2.21602e+08	27.7234		40277417	9805111	27835942	2.59728e+07	24.6305		550556344	38450858
RXN12787.1	A0A498M6I3	C-type mannose receptor 2-like protein	44840035		90724654	6.77823e+07	26.0144																							31496722	15678201	10561152	1.92454e+07	24.198
RXN12820.1	A0A498LX98	Vesicular glutamate transporter 1-like protein	342193112		811614408	576903760	29.1038		716472783	1.60663e+08	1.94008e+09	9.39071e+08	29.8067										2.88029e+06	2.88029e+06	21.4578		15357595	23.8724				271106831	271106831	28.0143			48019879	28649682	3.83348e+07	25.1922			215568760	26128370	120848565	26.8486
RXN25356.1	A0A498N4A0	Transcriptional activator Pur-beta	57207134		10113274	33660204	25.0045		9.46056e+07		3.39627e+08	2.17116e+08	27.6939																	7.66946e+06			7.66946e+06	22.8707		55863840		4.0198e+06	2.99418e+07	24.8357				311832228	311832228	28.2162
RXN06228.1	A0A498LD97	Enabled-like protein	27912462	8789603		1.8351e+07	24.1294		31096999		8.92598e+07	6.01784e+07	25.8427				33982944	33982944	25.0183		12338930	11885279	13292680	1.25056e+07	23.5761											196741652			196741652	27.5517
RXN33469.1	A0A498NP09	Elongation factor 1-beta	332322516	116285720		224304118	27.7409		62688708	297265982	64820164	141591618	27.0772								3.52311e+08	829712644	74534672	4.18853e+08	28.6419		1094476748	30.0276		172050283	569507117		370778700	28.466		355359748		264904900	310132324	28.2083		27657580	464274832		245966206	27.8739		342707858	221668764
RXN34180.1	A0A498NQ38	Rapunzel 4	31950053			31950053	24.9293				11788291	11788291	23.4909																		14446466	23363131	1.89048e+07	24.1722								30898566		25947280	28422923	24.7606			16629644
RXN28139.1	A0A498N1H3	Ubiquitin carboxyl-terminal hydrolase (EC 3.4.19.12)	2.50899e+07		98521624	6.18057e+07	25.8812		1659552534	16880022	2.17071e+09	1.28238e+09	30.2562		77851450		955109870	516480660	28.9441		205316584	12576359	240553089	152815344	27.1872		133006668	26.9869		1.60455e+08	9.84714e+07	79733046	1.12886e+08	26.7503		90425106		289615141	1.9002e+08	27.5016		498923240	58477990	1059159199	5.38853e+08	29.0053		222417582	94730228
RXN27825.1	A0A498NDH5	Inhibitor of nuclear factor kappa-B kinase subunit alpha	73140256	89302414		81221335	26.2754		1.09017e+08	223271302	496990530	2.76426e+08	28.0423									3.46611e+07	39836073	3.72486e+07	25.1507		792405376	29.5617		8.41914e+08	604916626	848967355	7.65266e+08	29.5114		328670056	57554250	6.06021e+08	3.30748e+08	28.3012		451959304	277053500	87631142	2.72215e+08	28.0202		1.58749e+09
RXN27055.1	A0A498NCB2	Junctional adhesion molecule C-like isoform X1	37275103		16508709	26891906	24.6807		20277755			20277755	24.2734				16306183	16306183	23.9589		3.96064e+06			3.96064e+06	21.9173							7.32387e+06	7.32387e+06	22.8042				10738563	10738563	23.3563
RXN09097.1	A0A498LUM0	ATPase ASNA1 (EC 3.6.-.-) (Arsenical pump-driving ATPase) (Arsenite-stimulated ATPase)	26173814		47490452	36832133	25.1345		1.12229e+08	178585772	4.6567e+08	2.52162e+08	27.9098		39761028			39761028	25.2449		1.19557e+08	3.94981e+07	3.71296e+08	1.76784e+08	27.3974		120641464	26.8462		28130372	10221674		19176023	24.1928				17174200	17174200	24.0337			13592206	110560774	62076490	25.8875
RXN04396.1	A0A498LBV7	Collagen alpha-1(XI) chain-like isoform X1	93231442		5.88393e+06	4.95577e+07	25.5626
RXN07996.1	A0A498LLS5	Omega-amidase NIT2	50193500		35793892	42993696	25.3576		216180359	39362368	502126283	2.52556e+08	27.912								5086219		1.86907e+07	1.18885e+07	23.5031		66407706	25.9848			33518111	86689234	6.01037e+07	25.8409		65258160		52427460	58842810	25.8104		58354388		93192244	75773316	26.1752		4.72335e+09	1.19074e+08
RXN11548.1	A0A498LSV1	NGFI-A-binding 2-like protein	139380416	7658161		7.35193e+07	26.1316
RXN09612.1	A0A498LPA5	Phosphatase 1B-like isoform X1	3.81176e+06	10186129		6.99895e+06	22.7387		6.61992e+08	235071906	836804419	5.77956e+08	29.1064		48055311		408046876	2.28051e+08	27.7648				8791770	8791770	23.0677		121085220	26.8514		2.96747e+07	165513736	8057161	6.77485e+07	26.0137								444264430	42545470	319195978	268668626	28.0013			34001615
RXN36919.1	A0A498NEB7	Beta-2-syntrophin	7.48781e+06		67746914	3.76174e+07	25.1649								25986096			25986096	24.6312								25451973	24.6013		98729980	4.01218e+06	9.90859e+08	3.64534e+08	28.4415		55207464		48609234	51908349	25.6295			932767575	5713007	469240291	28.8058			20742188
RXN21392.1	A0A498MP26	Golgi phospho 3	19846414		71781442	45813928	25.4493		8.34534e+06		9914502	9.12992e+06	23.1222								1.05846e+07	4.57092e+06	55488700	2.35481e+07	24.4891							4.71427e+07	4.71427e+07	25.4905		3.30232e+06			3.30232e+06	21.655				84636818	84636818	26.3348		29833704
RXN04525.1	A0A498LGI9	NAD-dependent protein deacylase sirtuin-5, mitochondrial (EC 3.5.1.-) (Regulatory protein SIR2 homolog 5) (SIR2-like protein 5)	52575652		44416036	48495844	25.5314		121380968	57723676	381930559	1.87012e+08	27.4786								83116417	9.67571e+07	399462355	1.93112e+08	27.5249		71404492	26.0895		10824843	29582939	92462034	4.42899e+07	25.4005			21645704	343357376	182501540	27.4433			91353080	143163614	117258347	26.8051		293028322
RXN34936.1	A0A498NTF0	Pyrroline-5-carboxylate reductase (EC 1.5.1.2)	110672756	11932411		6.13026e+07	25.8694		108180150		363088954	235634552	27.812								2.73544e+07	1354495	5.07112e+07	2.64734e+07	24.658		126968248	26.9199		16472276			16472276	23.9735			23296802	15902278	19599540	24.2243
RXN30384.1	A0A498NDJ7	Golgi-associated plant pathogenesis-related 1	214253343		994752784	6.04503e+08	29.1712		719950577		2297361565	1508656071	30.4906								2.95187e+07	8.04736e+06	1.79877e+07	18517928	24.1424		77493039	26.2076				35442548	35442548	25.079		177951412	17523628	341343710	1.7894e+08	27.4149				54980849	54980849	25.7124
RXN11550.1	A0A498LTV9	Inositol polyphosphate 1-phosphatase	21971944		16360987	1.91665e+07	24.1921		70475307	77350448	152066522	9.99641e+07	26.5749				43988616	43988616	25.3906								6081730	22.5361		21457796	37448722		29453259	24.8119		18823564		66646175	4.27349e+07	25.3489
RXN27782.1	A0A498N7X0	Phenazine biosynthesis-like domain-containing	7.26106e+08	105744376		4.15925e+08	28.6317		7.8612e+08	150615812	1071972538	6.69569e+08	29.3187		60006220	69581328		64793774	25.9494		8.82198e+07	24611125	147492806	8.67746e+07	26.3708		903188376	29.7505		47971120	125326380		86648750	26.3687								350530548	104541936		227536242	27.7615		331980718	2.42784e+08
RXN07431.1	A0A498LH16	Histone-like protein	6.40712e+06		171020752	8.87139e+07	26.4027		2892235812		6.35576e+09	4.624e+09	32.1065		123738666	302475440		213107053	27.667		77223352	38278979	234316324	1.16606e+08	26.7971		277354784	28.0472		134602957	858034529	1590769647	861135711	29.6817				106116780	106116780	26.6611				366095316	366095316	28.4476		564590351	111279970
RXN20803.1	A0A498MLX4	Receptor-type tyrosine-phosphatase delta isoform X1	15149310			15149310	23.8527		9.64699e+07		1.67468e+08	131968961	26.9756																		7.14538e+06		7.14538e+06	22.7686									49347784		49347784	25.5565
RXN28024.1	A0A498N8J8	Inosine-uridine preferring nucleoside hydrolase-like protein	58238224	56328445		5.72833e+07	25.7716			56612488		56612488	25.7546														85665868	26.3522
RXN26685.1	A0A498MZ60	COP9 signalosome complex subunit 5	44628304			44628304	25.4115		7.09712e+07	68047100	298448017	1.45822e+08	27.1196			5004015		5004015	22.2547		7.74168e+07	7.018e+07	1.04066e+08	8.38877e+07	26.322		29566950	24.8175		4343455	38721570	6.73752e+06	1.66008e+07	23.9848		38425116			38425116	25.1955		94503460	4411721	271141778	1.23352e+08	26.8782			4302678
RXN12812.1	A0A498LZK7	Ribosomal protein L19	104734128		301937904	203336016	27.5993				1828793665	1828793665	30.7682								608771176	992802523	2418967477	1340180392	30.3198					153143703	4.7337e+08	310126072	3.12213e+08	28.218		719500208		5.28377e+08	6.23938e+08	29.2168			369713072	922936175	6.46325e+08	29.2677		141051355	265573548
RXN17295.1	A0A498MJ03	26S protease regulatory subunit 6A	51486236		56515724	54000980	25.6865		504535497	168621632	1.94266e+09	8.7194e+08	29.6997		259133976		504432790	381783383	28.5082		6.82353e+08	1.34126e+09	1769246199	1.26429e+09	30.2357		785146550	29.5484		2.6306e+08	323389250	251752890	2.79401e+08	28.0578		202314771	91442530	219545564	171100955	27.3503		808226840	393623821	5.6125e+08	5.877e+08	29.1305		4.50713e+08	2.33363e+08
RXN02804.1	A0A498L8S4	Glycogenin-1-like isoform X1	305636448			305636448	28.1872			67872464		67872464	26.0163		76239512		47337068	61788290	25.8808																			62166972	62166972	25.8896									23466312
RXN20013.1	A0A498MJN9	Alpha-2-macroglobulin receptor-associated	64520702		16403774	40462238	25.2701		108534017	135517800	351972875	1.98675e+08	27.5658				16027179	16027179	23.934			29053599		29053599	24.7922						18431832		18431832	24.1357				8299316	8299316	22.9846			13731240	6.33877e+06	1.0035e+07	23.2585		3.6037e+08
RXN28025.1	A0A498NDR9	Inosine-uridine preferring nucleoside hydrolase-like protein	88902480		131338042	110120261	26.7145		2.934e+08	21407384	7.30592e+08	3.48466e+08	28.3764									1.1414e+07	8511093	9.96257e+06	23.2481					58643654	1.015e+08	14930471	5.83579e+07	25.7984		47678336		142473936	95076136	26.5026		447364232	18461456	674228204	380017964	28.5015		371900958	23223492
RXN24893.1	A0A498MYG1	Proteasome subunit beta (EC 3.4.25.1)	1.93e+08		402747557	2.97874e+08	28.1501		264124742		568421635	4.16273e+08	28.633				19044422	19044422	24.1829		1.50766e+08	6.08317e+08	153359021	3.04147e+08	28.1802		435927992	28.6995		3.48786e+08	987822223	617893598	6.51501e+08	29.2792		277243030		6.44631e+07	1.70853e+08	27.3482		619811894	236896892	1039746692	632151826	29.2357		2.98685e+08	258841830
RXN26252.1	A0A498N352	Cartilage-associated-like protein	39221200		37767078	38494139	25.1981										19726046	19726046	24.2336												8250853		8250853	22.9761
RXN15130.1	A0A498M3M6	DNA ligase (EC 6.5.1.1)	6272636		60644452	33458544	24.9959															249397299		249397299	27.8939
RXN25252.1	A0A498N0E6	Biliverdin reductase A	42666423			42666423	25.3466		2.09056e+08		9.21589e+08	565322719	29.0745		26775904			26775904	24.6744		1.47578e+07		2.02469e+07	1.75024e+07	24.061		24534800	24.5483		86491306	173468446	156439546	138799766	27.0484								7222553882	77478485	9337856541	5.54596e+09	32.3688		66784932	8.86205e+07
RXN05465.1	A0A498LIZ7	Nuclear pore membrane glycoprotein 210-like	80501636		488395964	284448800	28.0836																							1.30531e+07	31759166	8.0444e+07	4.17521e+07	25.3153		6.6807e+06		9618389	8.14955e+06	22.9583								918529
RXN25611.1	A0A498MYN3	LDLR chaperone MESD	63401118		85690736	74545927	26.1516														157327377	219218230	9.31715e+07	1.56572e+08	27.2223																		15868763		15868763	23.9197		4547679
RXN32054.1	A0A498NK32	Nucleolysin TIA-1-like isoform X1	11991684		6.4447e+06	9.21819e+06	23.1361				7.32332e+08	7.32332e+08	29.4479								31066235	210309651	412229607	2.17868e+08	27.6989					235059687		76387049	155723368	27.2144								134206554		80812248	107509401	26.6799		3.01319e+08
RXN12671.1	A0A498LN13	Glutamine--fructose-6-phosphate aminotransferase [isomerizing] 1	10557435	31304597		20931016	24.3191		422842056		3.59772e+08	3.91307e+08	28.5437		92349646		557147518	324748582	28.2747		61118965		5.83972e+07	5.97581e+07	25.8326		396263170	28.5619		4.02264e+08	5.3258e+08	1.11882e+08	3.48908e+08	28.3783		26232973	9242967	1.90375e+07	1.81712e+07	24.1151		80489502	10353527	116952038	6.9265e+07	26.0456			5.92581e+07
RXN23008.1	A0A498MNH2	Pyrroline-5-carboxylate reductase (EC 1.5.1.2)	159161200	33463608		96312404	26.5212			47548817		47548817	25.5029		30635696			30635696	24.8687		6.05997e+08	296922008	1478929935	7.9395e+08	29.5645		549255726	29.0329		42476496	19039568	47182773	3.62329e+07	25.1108		35932582			35932582	25.0988			22060986		22060986	24.395		17213668	39808214
RXN10248.1	A0A498LP95	Serum paraoxonase arylesterase 2-like protein	287602064		99396464	193499264	27.5278		27346454		127468068	77407261	26.206										222667442	222667442	27.7303		371975014	28.4706				238788952	238788952	27.8312		115009072	114745842	298575578	176110164	27.3919		1006742033	89086032	3907691632	1667839899	30.6353
RXN11841.1	A0A498LUI2	Serine/threonine-protein phosphatase (EC 3.1.3.16)	240624556		394574592	317599574	28.2426		2276847545	2275496769	5279658425	3.27733e+09	31.6099		85283896	40705540		62994718	25.9087		4.2694e+08	2.56685e+08	697469029	460364482	28.7782						654907515	493691140	5.74299e+08	29.0972		957925582	299695913	485775051	581132182	29.1143		327756884	109324348	795169406	4.1075e+08	28.6137		4.40526e+08	137870155
RXN15665.1	A0A498MDW3	Calcium-binding 1-like protein	116075148		28521628	72298388	26.1075		33780215	97015836	32404387	54400146	25.6971				20435012	20435012	24.2845		5.28586e+07		1.47163e+08	1.00011e+08	26.5756		81690024	26.2837		134502276	22166454	250895710	1.35855e+08	27.0175			56577224		56577224	25.7537				80828494	80828494	26.2684		68275352	29733944
RXN20142.1	A0A498MKW9	GTPase KRas isoform X1			18516642	18516642	24.1423		3.88323e+07	858996540	244688106	3.80839e+08	28.5046																							21692572	20066371		2.08795e+07	24.3156		55281960	6.17389e+06		3.07279e+07	24.873		1.67523e+06	19387580
RXN14348.1	A0A498LRG8	Vitronectin-like protein	25093077	76838132		5.09656e+07	25.603				20036218	20036218	24.2561				85020752	85020752	26.3413		9014561	86192944	1.2854e+07	3.60205e+07	25.1023		79164230	26.2383														81408573	105157668	177523632	121363291	26.8548			65243762
RXN09641.1	A0A498LNM5	Charged multivesicular body 2a	79535282		2.29046e+08	1.54291e+08	27.2011		4.90992e+07	27471994	137987707	7.15196e+07	26.0918			16844828	10138440	13491634	23.6856			3.87646e+07	50435596	4.46001e+07	25.4105		51785532	25.626		8465082	42425537	48936442	33275687	24.988		21075902			21075902	24.3291		41896080	46440114	157162461	81832885	26.2862		6.72626e+07
RXN02867.1	A0A498LAJ2	Utrophin-like isoform X1		2.7259e+06		2.7259e+06	21.3783																				1.05399e+08	26.6513			15514304		15514304	23.8871									168032108		168032108	27.3242		4752794	14152898
RXN26376.1	A0A498N034	Collagen alpha-1(XVI) chain isoform X1	68143136	45853500		56998318	25.7644																																										53285807
RXN22214.1	A0A498MS62	COP9 signalosome complex subunit 6	123696582		98532676	111114629	26.7275		3.37902e+07	175912803	2.40686e+08	1.50129e+08	27.1616								4039075		129447873	66743474	25.9921						15999587	80954690	4.84771e+07	25.5308		58550696		10213238	34381967	25.0351		58317112		374189140	216253126	27.6881
RXN28189.1	A0A498MXW2	Cellular retinoic acid-binding 2-like protein	167392076	91365762		129378919	26.947		5284342			5284342	22.3333																	1.02029e+08		177821542	1.39925e+08	27.0601		526281080		2.08195e+08	3.67238e+08	28.4521									62713542
RXN26617.1	A0A498NCA7	A-kinase anchor 12-like isoform X1	32317240		40407360	36362300	25.1159		578565405	62821156	3.60195e+08	3.33861e+08	28.3147			14437673		14437673	23.7833		2.36388e+06	3426099		2.89499e+06	21.4651		67468632	26.0077		10168848	34897840		22533344	24.4256								8.70773e+06		3.44286e+07	21568180	24.3624			8.82679e+06
RXN20034.1	A0A498ML17	Lectin-like protein	112323096		4.44914e+08	2.78618e+08	28.0537			72134264		72134264	26.1042								4.08097e+06	3.47601e+06		3.77849e+06	21.8494					19438766		257413792	138426279	27.0445		2149733662	27520868	11248252846	4.47517e+09	32.0593		783970936		764498957	7.74235e+08	29.5282			1435865425
RXN08908.1	A0A498LKH3	WW domain-binding 2							7.49499e+08	343154630	1.49127e+09	861307751	29.682		32292168		49282268	40787218	25.2816				6556816	6556816	22.6446																	49474656		9.24058e+07	7.09402e+07	26.0801
RXN19137.1	A0A498NYV6	Caveolin	68953683		120664296	9.4809e+07	26.4985																															45145604	45145604	25.4281
RXN05190.1	A0A498LA32	Persulfide dioxygenase mitochondrial	3.49897e+07		71451264	5.32205e+07	25.6655		9.43229e+08	6.86621e+08	1608253622	1.07937e+09	30.0075														431044490	28.6833		63651456	451574136	28804534	1.81343e+08	27.4341		1319078816	309906526	1.90112e+09	1.1767e+09	30.1321			470389284	135979906	303184595	28.1756		43358679	35546844
RXN26391.1	A0A498N0U4	Phosphatidylinositol 4-kinase alpha-like isoform X2	44225386		34938859	3.95821e+07	25.2383		154079317		2.82044e+08	2.18062e+08	27.7002														454025192	28.7582				154201788	154201788	27.2002		1.64639e+09	4.93802e+08	733852736	958016201	29.8355								489162204
RXN34684.1	A0A498NT37	Cystatin-B-like protein	267078464			267078464	27.9927																				44464560	25.4062
RXN31728.1	A0A498NIR6	Cathepsin S-like protein	45071071			45071071	25.4257																							698440976	483068464	739812934	6.40441e+08	29.2545									208493184		208493184	27.6354		93194326	8552646
RXN32814.1	A0A498NM22	Sulfurtransferase	26736605			26736605	24.6723		249706452	224019411	1003854453	492526772	28.8756														89856298	26.4211			7.56075e+07		7.56075e+07	26.172		9904157		4928287	7416222	22.8223			214437696	172614843	1.93526e+08	27.528		393606708
RXN25646.1	A0A498N525	Eukaryotic peptide chain release factor subunit 1	14032545		63140621	38586583	25.2016		1.41308e+08	9472857		7.53905e+07	26.1679		82580988		166467148	124524068	26.8918		162460243			162460243	27.2755					99215488	97873810	8.15194e+07	9.28696e+07	26.4687		191102082		46226036	118664059	26.8223								197246598	1.10266e+08
RXN10080.1	A0A498LPI1	Coatomer subunit alpha	7.85158e+06	8683387		8.26748e+06	22.979		2.75447e+08	15317157	6.25657e+08	3.05474e+08	28.1865		117486812		258549418	188018115	27.4863		1064164784	3.30288e+07	8.07741e+08	6.34978e+08	29.2421		3.9648e+08	28.5627		7.2646e+08	755357778	4.67226e+08	6.49681e+08	29.2752		6.9595e+08	3.53159e+08	413657359	4.87589e+08	28.8611		319065666		7.5669e+08	5.37878e+08	29.0027		4.56716e+08	1.07981e+08
RXN19264.1	A0A498MIT6	Protein transport protein SEC23	8620038			8620038	23.0393		1.04666e+08		7.21562e+07	88411015	26.3977		37151127		358662952	1.97907e+08	27.5602		80663116		45325755	6.29944e+07	25.9087		17567194	24.0664		6796639	9840384	29567480	15401501	23.8766		138808180		78372492	108590336	26.6943		25964524		142599739	8.42821e+07	26.3287		19065060
RXN17354.1	A0A498MDH6	Vacuolar sorting-associated 35	8942753		44179492	2.65611e+07	24.6628		1.41396e+09	28719121	1.66568e+09	1.03612e+09	29.9485		35786928	5162720	579041894	2.06664e+08	27.6227		54265083		9.38636e+07	7.40643e+07	26.1423		353837970	28.3985		6.04344e+07	143064993	18700504	7.40666e+07	26.1423		109861344	75031088	102736762	95876398	26.5147		182770754		436666860	309718807	28.2064			3.10287e+07
RXN21483.1	A0A498MNV8	Mitochondrial fission 1 protein	48815920		100087974	74451947	26.1498		8.35908e+06		19053252	1.37062e+07	23.7083								3.99363e+06	49779719		2.68867e+07	24.6804		12872706	23.6178			40116632		40116632	25.2577		160697860		55989384	108343622	26.691				1.47489e+06	1.47489e+06	20.4922
RXN35577.1	A0A498NVU3	Adenylate kinase mitochondrial-like protein	124706904		67978560	96342732	26.5217		10492221	4.30147e+06		7.39685e+06	22.8185														32468612	24.9525		146916800	49664900	66722457	8.77681e+07	26.3872				9127785	9127785	23.1218			12940072		12940072	23.6253		1.37037e+09	101684005
RXN17510.1	A0A498MB86	Delta-aminolevulinic acid dehydratase (EC 4.2.1.24)	53086388		81327594	67206991	26.0021		1.67022e+08	377896607	733981816	4.263e+08	28.6673			93369614		93369614	26.4764		239530852	102106813	470513288	2.70717e+08	28.0122		504877393	28.9114		123325712	1.73636e+08	1.04088e+08	1.33683e+08	26.9942		128511335	214726570	160194925	1.67811e+08	27.3223		2.43914e+09	462856342	4483168683	2.46172e+09	31.197		5.14653e+08	45662253
RXN23122.1	A0A498MTS8	Inter-alpha-trypsin inhibitor heavy chain H3-like isoform X2		8428142		8428142	23.0068		4.02178e+06		1.06795e+08	5.54083e+07	25.7236		90816182		277942308	184379245	27.4581								85889779	26.356		10223500	3.02758e+07		2.02497e+07	24.2714		17820802			17820802	24.0871		2480585880	70687997	3439938205	1997070694	30.8952			8.01077e+08
RXN28734.1	A0A498LE53	F-box only 50	113398224			113398224	26.7568		6.55233e+06	87920728		4.72365e+07	25.4934		11400631			11400631	23.4426								431488286	28.6847		147513497	337360030	1.41983e+09	6.34903e+08	29.242		29796956		139349408	84573182	26.3337		30654763			30654763	24.8696		7.33157e+08
RXN12553.1	A0A498LYC7	Sidoreflexin		1.83286e+06		1.83286e+06	20.8057		5.97654e+08	160952468	1456764277	7.38457e+08	29.4599		12875515			12875515	23.6181		1.05346e+07		10051008	1.02928e+07	23.2951		202110035	27.5906				11368120	11368120	23.4385		190875537	15954468	185788031	1.30873e+08	26.9636				12705710	12705710	23.599		5.21404e+08
RXN31268.1	A0A498NHH3	Myosin-16-like isoform X2	206881952		200256368	203569160	27.6009		4962525422	91619002	415454527	1.8232e+09	30.7638		9823313953	1286676804	15185224072	8.76507e+09	33.0291								121975136	26.862		5508953866	3115183918	7779513274	5467883686	32.3483		1109294720	58196273	4722953360	1963481451	30.8708		26628888	295298271	158013602	1.5998e+08	27.2533		3.12832e+08
RXN29108.1	A0A498N4R1	Clathrin light chain	165585832			165585832	27.303			42199556		42199556	25.3307																	102777969	103633974	244584812	1.50332e+08	27.1636				18206028	18206028	24.1179									19679482
RXN32140.1	A0A498NJN0	Carbonyl reductase [NADPH] 1-like protein	52247804		84129318	68188561	26.023		9.24955e+08	1232869552	1916127409	1.35798e+09	30.3388		261186774	65828127	431828596	2.52948e+08	27.9143		2.04857e+07	6.97377e+07	2.63697e+07	3.88644e+07	25.2119		123352170	26.8782		582498661	590850352	170181821	4.47844e+08	28.7384		91982976		27579434	59781205	25.8332		183871586	447747274	901409297	5.11009e+08	28.9288		197952256	67493498
RXN35214.1	A0A498NUJ1	Secreted acidic cysteine rich glyco	15447919	129933424		7.26907e+07	26.1153																				9481347	23.1767		6486695	18087832		1.22873e+07	23.5507
RXN18218.1	A0A498MAU7	Arpin	53419638		16506156	34962897	25.0593		25067897	13353697	76295560	3.82391e+07	25.1885								3.30759e+06	5.52511e+07		2.92793e+07	24.8034		20704726	24.3035		23623531	12138887	4569576	13443998	23.6805				2.37115e+07	2.37115e+07	24.4991			21271426		21271426	24.3424		1.52465e+06	6.43919e+06
RXN33512.1	A0A498NND0	Integral membrane 2B-like protein	18324496		8794362	13559429	23.6928				3.83677e+06	3.83677e+06	21.8715																			4524229	4524229	22.1092
RXN08038.1	A0A498LI78	Separin-like protein	68439552		3.28814e+07	5.06605e+07	25.5944		70488594			70488594	26.0709		224998976		1112642383	6.68821e+08	29.317												40797837	1.75825e+08	1.08311e+08	26.6906				5225057	5225057	22.317		64755900	207690538	426916336	2.33121e+08	27.7965		11690277	56891988
RXN23280.1	A0A498MS39	Beta-soluble NSF attachment	75601448		127612912	101607180	26.5984		1185873551	471367534	1.5235e+09	1.06025e+09	29.9818																															85341105	85341105	26.3467			56320230
RXN08796.1	A0A498LP04	ER membrane complex subunit 8	10193541		26130384	1.8162e+07	24.1144															1.29378e+06		1.29378e+06	20.3032
RXN09636.1	A0A498LRC0	Hexosaminidase D-like isoform X1	23729845		55847612	3.97887e+07	25.2459		508320635	7.50942e+07	874177636	4.85864e+08	28.856		251432808		416827287	3.3413e+08	28.3158								42590748	25.344			1.41119e+08		1.41119e+08	27.0723		82903951	17094825	152360778	8.41199e+07	26.3259		29060114	41423109	1.0544e+08	5.8641e+07	25.8054		40235148	17816128
RXN18622.1	A0A498MGZ5	4-hydroxyphenylpyruvate dioxygenase	8953757		17838280	1.3396e+07	23.6753																																										11307880
RXN27523.1	A0A498LE09	Gamma-glutamylcyclotransferase-like protein							1883494496	276517368	3032666270	1.73089e+09	30.6889				90028640	90028640	26.4239												127946360		127946360	26.931								209974252		131382563	1.70678e+08	27.3467			143596018
RXN16166.1	A0A498LDS4	Flightless-1-like protein		7541821		7541821	22.8465		5.79799e+07		152057009	1.05018e+08	26.6461								1.34978e+07		14054558	1.37762e+07	23.7157					10261983	7637494	20322250	1.27406e+07	23.6029		8.16901e+06		85906000	4.70375e+07	25.4873		41121920		10248074	25684997	24.6144		1.7775e+06	11858631
RXN03190.1	A0A498L497	COMM domain-containing 6	24010870		72000186	48005528	25.5167			25577242		25577242	24.6084														15204767	23.858
RXN19828.1	A0A498MF19	2-amino-3-ketobutyrate coenzyme A mitochondrial	23363126			23363126	24.4777															1.07619e+08		1.07619e+08	26.6814					27129966		43042560	35086263	25.0644				34953424	34953424	25.0589			254917174		254917174	27.9255
RXN17023.1	A0A498MAZ7	Sperm acrosome membrane-associated 4-like protein	71655688		245359829	1.58508e+08	27.24																							11727945	10410834	54665657	2.56015e+07	24.6097									30309506		30309506	24.8533			82059713
RXN23815.1	A0A498N4K6	Calnexin isoform X1	6482006	6.81678e+06		6.64939e+06	22.6648		1.16221e+09		839610949	1.00091e+09	29.8987				366223908	366223908	28.4482		1.63459e+08	2.9589e+07	2.70199e+08	1.54416e+08	27.2022		561002564	29.0634		266585166	1.20168e+08	231811245	2.06188e+08	27.6194		227708478	109873892	139180834	158921068	27.2437		122806806	47978385	489997330	2.20261e+08	27.7146		3.94912e+08	88563427
RXN05757.1	A0A498LJF1	Ubiquitin-conjugating enzyme E2 W	27367306		26926802	27147054	24.6943			56931476	11417686	34174581	25.0264																	72112459	1.37426e+07	20889642	3.55816e+07	25.0846		76443832		38930980	57687406	25.7818								41490592
RXN18680.1	A0A498MEU0	High mobility group B3-like protein	89087488		36857264	62972376	25.9082		59821663	702566824	107141955	2.89843e+08	28.1107		165796194		182145754	173970974	27.3743			2.38336e+07	9589131	1.67114e+07	23.9943		105924364	26.6585		615866494	328460540	944050756	6.29459e+08	29.2295				24401598	24401598	24.5405		34527160	791227566		412877363	28.6211		1.02634e+08	17469002
RXN06434.1	A0A498LE30	Parvalbumin-7 isoform X1			24814868	24814868	24.5647		53997534	2545379904	2.16061e+08	9.3848e+08	29.8058		115449304		911236700	513343002	28.9353											2769323700	3901115142	700224344	2.45689e+09	31.1942				24576145	24576145	24.5508			1.89579e+07		1.89579e+07	24.1763			8693592
RXN28621.1	A0A498N724	Peptidyl-prolyl cis-trans isomerase (PPIase) (EC 5.2.1.8)	99979696		83714184	91846940	26.4527		266830612	454276420	1308910507	676672513	29.3339
RXN31448.1	A0A498NI15	Heparin cofactor 2	29606768	27488120		28547444	24.7669		2.16765e+07		106779541	6.4228e+07	25.9367		330032093	146122868	724214286	4.00123e+08	28.5759		2.55143e+06			2.55143e+06	21.2829		268910748	28.0026		57599838	6.59715e+07	18225954	4.72657e+07	25.4943		62013764		5.81627e+07	6.00882e+07	25.8406		2293161678	3.56387e+08	3.2957e+09	1.98175e+09	30.8841		8.23034e+07	994036020
RXN15405.1	A0A498MD29	ADP-ribosylation factor-binding GGA3-like isoform X2	529674720	136670696		333172708	28.3117		3.95607e+07		81227876	6.03943e+07	25.8479			24055054	69984112	47019583	25.4868		2.25018e+07	19546985	6977167	1.6342e+07	23.9621		241571047	27.8479			265172472	539447616	402310044	28.5837		875252544			875252544	29.7051				79033928	79033928	26.236		17738254	149236967
RXN29165.1	A0A498NES3	Histidine--tRNA cytoplasmic isoform X1	4473693			4473693	22.093		512375551	18181190	1.03124e+09	5.20599e+08	28.9556		49821125		106740536	7.82808e+07	26.2222		3.27638e+07	4.83488e+07	123107746	6.80734e+07	26.0206		238855872	27.8316		59504876	2.82384e+07	55151169	4.76315e+07	25.5054		56564356			56564356	25.7534		66899422	34712199	84078668	61896763	25.8834		119876961	68578157
RXN07651.1	A0A498LHU8	Unconventional myosin-Ic-like isoform X1	19830466		12182837	1.60067e+07	23.9322		9598669		4.65706e+07	2.80847e+07	24.7433				263888364	263888364	27.9754				5.0521e+06	5.0521e+06	22.2685					1.46981e+08	1.27433e+08	50648958	1.08354e+08	26.6912		2.87793e+08		212616260	2.50205e+08	27.8985		27712594		40536188	34124391	25.0243		33003572	3.86181e+07
RXN27817.1	A0A498NDY9	Erlin-1	17358676		38831812	28095244	24.7438		9.3325e+07	74619520	340709246	1.69551e+08	27.3371				27384032	27384032	24.7068		4.08472e+08	1.89002e+08	8.57104e+08	4.84859e+08	28.853		181427850	27.4348		1.80641e+08	1.83923e+08	394310120	252958157	27.9143		156534801		5.55781e+08	3.56158e+08	28.4079		175793309	97118592	1.03107e+09	4.3466e+08	28.6953		8.04294e+07	23722072
RXN27309.1	A0A498MZ16	E3 SUMO-protein ligase ZNF451 isoform X1	71372555		31741684	5.15571e+07	25.6197																				16562163	23.9814								398039082		225819912	311929497	28.2166
RXN16811.1	A0A498M820	14 kDa phosphohistidine phosphatase-like protein	13967315	15563772		1.47655e+07	23.8157																															11817500	11817500	23.4944
RXN03972.1	A0A498N211	Glyoxylate reductase hydroxypyruvate reductase-like protein	40240860		24537482	32389171	24.949		5.60687e+08	123351824	1448369830	7.10803e+08	29.4049				13608796	13608796	23.698		66928356	5.53002e+07	218633785	1.13621e+08	26.7597		37845016	25.1736			24197282		24197282	24.5283		54283872			54283872	25.694		78082560		321437565	1.9976e+08	27.5737		74118400
RXN04656.1	A0A498LCL9	Calcium-binding and coiled-coil domain-containing 2-like protein	14349757			14349757	23.7745		26274956		49649567	3.79623e+07	25.1781																													61948956			61948956	25.8846		40392636
RXN27099.1	A0A498MYH6	Barrier-to-autointegration factor	10524201		15247535	12885868	23.6193		24787170	174902048	1.28335e+07	7.08409e+07	26.0781														295513336	28.1386			485986440	51396188	268691314	28.0014		44631924		7.78225e+06	2.62071e+07	24.6435			146312127		146312127	27.1245		140628972	135651418
RXN20026.1	A0A498MMX0	NADH dehydrogenase [ubiquinone] iron-sulfur mitochondrial-like protein	20440700		28295699	2.43682e+07	24.5385		544363862	345436544	1207891581	6.99231e+08	29.3812				49558768	49558768	25.5626		447056763	3.4191e+08	210851332	3.33273e+08	28.3121		374697008	28.4811			269282746	614261222	441771984	28.7187		114145128		66369392	90257260	26.4275		91190298	911763840	362583972	455179370	28.7619		144545710	37195140
RXN38823.1	A0A498P3P8	Importin-5	15115728	1.1119e+07		1.31174e+07	23.645		169042141		146033158	1.57538e+08	27.2311		80937058		358320262	219628660	27.7105		9.09788e+08	9.86357e+07	1030749218	6.79724e+08	29.3404						16101492		16101492	23.9407			123697344	21926436	72811890	26.1177			7.83536e+06	20856316	1.43458e+07	23.7741		41159405
RXN25598.1	A0A498MUW2	26S proteasome non-ATPase regulatory subunit 1	16969916	7.23249e+06		1.21012e+07	23.5286		519624541		651390772	5.85508e+08	29.1251				136580308	136580308	27.0252		3.13093e+08	21435604	2.1807e+08	1.84199e+08	27.4567		76004748	26.1796		95135582	1.07016e+08	18073220	7.34081e+07	26.1294		76230496		203253260	139741878	27.0582		150975758	36239060	204039172	1.30418e+08	26.9586		145798860	23383126
RXN17747.1	A0A498MLA5	Lamina-associated polypeptide 2-like isoform X3	35618872		22733050	29175961	24.7983		9607079		9365832	9.48646e+06	23.1774		30922610		396813644	213868127	27.6721		1.37829e+07		4.50086e+06	9141880	23.1241		74847400	26.1574			77473106	208998990	143236048	27.0938		33277332		39715492	36496412	25.1213			190891268	10171087	1.00531e+08	26.5831			81823908
RXN08179.1	A0A498LIL7	Alpha-galactosidase (EC 3.2.1.-)			19183680	19183680	24.1934		16597696			16597696	23.9845				29406876	29406876	24.8097		5390940		6219787	5.80536e+06	22.469		348515110	28.3766		144855744	74038560	8.46182e+07	1.01171e+08	26.5922		186810301	4401498	70462635	8.72248e+07	26.3782		17093572	16372347	10481780	14649233	23.8043		859161046	33059028
RXN13491.1	A0A498LZ21	Zinc finger BED domain-containing 4-like protein	7.9766e+06		32140938	2.00588e+07	24.2577		390040003	721055578	1654710038	9.21935e+08	29.7801			5980819		5980819	22.5119		1095543554	808898426	8.35499e+08	9.13314e+08	29.7665					85515360	8618809	136954044	7.70294e+07	26.1989		176888076		38351745	1.0762e+08	26.6814		62053600	719528175		3.90791e+08	28.5418		347725876
RXN13957.1	A0A498M9Z8	Ferritin	38902272		141592668	90247470	26.4274		449015320	546761872	792415257	5.96064e+08	29.1509		8635799		30460441	19548120	24.2205		980259145	1.69812e+09	73375256	9.17252e+08	29.7727					38594799	11048927	350900189	1.33515e+08	26.9924				103238282	103238282	26.6214		511241960	325645536	426034522	420974006	28.6492		67719728	81545966
RXN26300.1	A0A498MZP1	Proteasome subunit beta (EC 3.4.25.1)	89921742		275753960	182837851	27.446		265986166	388303884	736746207	4.63679e+08	28.7886		11595808	5.26852e+06	23156376	1.33402e+07	23.6693		243012056	1.57994e+08	88354411	1.6312e+08	27.2814		233541996	27.7991		537610868	548106231	493051384	526256161	28.9712		394274496		20436340	207355418	27.6275		467425462	167659103	767128820	4.67404e+08	28.8001		7.69725e+07	2.12833e+08
RXN20168.1	A0A498MFZ8	PRA1 family protein	144398036		31256326	87827181	26.3882		37531276	90937636	123801720	8.40902e+07	26.3254																	70073108		29962386	50017747	25.5759		30684884			30684884	24.871				10108973	10108973	23.2691
RXN08432.1	A0A498LKR5	Complement factor I-like protein			14054829	14054829	23.7446		114310370	84500002	1.85481e+08	1.28097e+08	26.9327																													205888534		590689662	398289098	28.5692
RXN21545.1	A0A498MY16	Prostaglandin reductase 1-like protein	34211224		155047414	94629319	26.4958				1.60441e+07	1.60441e+07	23.9355														5544164549	32.3683		6.70667e+08	456679010	417721544	5.15023e+08	28.9401		397038652		660474254	528756453	28.978			14417395		14417395	23.7813		251204358	117888169
RXN14055.1	A0A498M8Y5	Metallo ase inhibitor 2-like protein	53457100		32726160	43091630	25.3609		18253218			18253218	24.1216									4.92355e+06		4.92355e+06	22.2313		78741464	26.2306				8.33199e+06	8.33199e+06	22.9902										16214635	16214635	23.9508
RXN12320.1	A0A498LVX5	Synaptopodin-2-like protein	14345708		16444693	1.53952e+07	23.876								84855556	21658388		53256972	25.6665												2.3452e+08	37456932	1.35988e+08	27.0189				323689668	323689668	28.27			5293050868	262038144	2777544506	31.3712			5.69165e+06
RXN21807.1	A0A498LPI5	BTB POZ domain-containing KCTD5-like isoform X2	99060416	15538228		57299322	25.772			149149008		149149008	27.1522								17839744		4.16721e+06	1.10035e+07	23.3915						79634262		79634262	26.2469									15970480		15970480	23.9289
RXN04489.1	A0A498L877	Zinc finger CCCH domain-containing 13-like protein	44228636	3973593		2.41011e+07	24.5226																				82487115	26.2977			1.13375e+06		1.13375e+06	20.1127														1339320030	20407482
RXN34513.1	A0A498NRF7	Mago nashi-like protein	49283205		118690560	8.39869e+07	26.3237		87909662	175686064	439261079	2.34286e+08	27.8037								3645028	6.12006e+06		4.88255e+06	22.2192		370156320	28.4636		297072432	48253562	234078934	193134976	27.525		159752392	141837377	60025330	1.20538e+08	26.8449		433306512			433306512	28.6908		180451024	18768840
RXN10343.1	A0A498LRM8	Serine/threonine-protein phosphatase 2A activator (EC 5.2.1.8) (Phosphotyrosyl phosphatase activator)	42500168		76943824	59721996	25.8318		8.76176e+07	58663054	515048671	2.20443e+08	27.7158		13216732			13216732	23.6559				37519657	37519657	25.1611		106596890	26.6676		9877942	2.43476e+07	4.879e+06	13034839	23.6359		32398558		29854994	31126776	24.8917		261748760		7.99684e+08	5.30716e+08	28.9834			13823291
RXN31648.1	A0A498NIJ0	Four and a half LIM domains 3-like protein	61446384		304331040	182888712	27.4464																								4690868	11713490	8202179	22.9676		61256612		295133654	178195133	27.4089			1.24496e+09		1.24496e+09	30.2135			11190587
RXN32734.1	A0A498MQJ7	Aspartate aminotransferase (EC 2.6.1.1)	13554997		47532668	3.05438e+07	24.8644		9809249769	10896995846	16768384183	12491543266	33.5402		476142430	35139376	860548012	457276606	28.7685		1994865627	944606168	2.68573e+09	1.87507e+09	30.8043		657902467	29.2933		4.29925e+08	580462026	116612664	3.75667e+08	28.4849		719131956	54378496	800073286	5.24528e+08	28.9664		338885556	1921239084	3.01351e+09	1.75788e+09	30.7112		1476936826	178761912
RXN22681.1	A0A498MPD7	Putative family 31 glucosidase KIAA1161-like protein	12069661	136684805		74377233	26.1484								26687452		626410730	326549091	28.2827
RXN37723.1	A0A498P0M2	Pro convertase subtilisin kexin type 6 isoform X1	21075586		17865118	19470352	24.2148			65371456	46828532	56099994	25.7415								6.41595e+06	4.90994e+06	66548310	2.59581e+07	24.6297		60682646	25.8548		120358322	61470467	225165532	1.35665e+08	27.0155		156859664			156859664	27.2249			11649701		11649701	23.4738
RXN38200.1	A0A498P0U4	TIP41	35944452		31364464	33654458	25.0043		48726855		41084210	4.49055e+07	25.4204								4.97868e+07		60259283	5.50231e+07	25.7135							5.6994e+06	5.6994e+06	22.4424								37534756		14050961	2.57929e+07	24.6205
RXN02427.1	A0A498L961	Eukaryotic translation initiation factor 3 subunit K (eIF3k) (Eukaryotic translation initiation factor 3 subunit 12) (eIF-3 p25)	70811896		414099232	242455564	27.8531				63391362	63391362	25.9178		70183592		74172736	72178164	26.1051		55603726	23575951	4.17378e+07	4.03058e+07	25.2645		193828584	27.5302		291120488	35594298	172673272	166462686	27.3106		119897166		199890512	159893839	27.2525			71097768	12727460	41912614	25.3209		3.48926e+08	90703515
[truncated: 7,433 more rows]
[truncated: 44 more columns]

## Sheet: Log_Avg_19_Mv_del_8128
Accession	Mix NCBI up	Protein	Air bladder	Brain	Eye	F emale gonad	Gall bladder	Gill	Gut	Heart	kidney	Liver	Male gonad	Muscle	Scales	Skin	Spinal cord	Embryo	Fin	Plasma	Spleen	Count Blank
[truncated: 8,127 more rows]

[truncated: 3 more sheets: Main_exp_sheet_5702, Input_Ttl_19_PA_5702, Input_Shared_19_PA_23]
