# Supplementary material for: The Proteome Map and PeptideAtlas of a widely cultivated tropical water fish Labeo rohita: A resource for the Aquaculture Community
Source: Research Square preprint supplement (doi:10.21203/rs.3.rs-397364/v1), 2021-04-12
Supplement: Supplementary file 10 [file e94ecdc3b881cb14376cce3e.xlsx]

## Sheet: Description_of_Worksheets
			Worksheet	Description
			Total_proteins_PA	Total 9286 proteins of peptide atlas including 6015 canonical proteins
			Organ_wise_can_prots	Organ wise total canonical proteins (matrix showing presence or absence of a prticula protein with 1 and 0 respectively.
			Canonical Protein eggNOG output	EggNOG output for functional annotation of all canonical proteins.
			Organ eggNOG output	Organ wise EggNOG output for functional annotation of canonical proteins.

## Sheet: Total_proteins_PA
biosequence_name	NCBI ID	Protein name	is_covering	presence_level	probability	confidence	n_observations	norm_PSMs_per_100K	n_distinct_peptides	chromosome	genetic_locus	start_in_chromosome	end_in_chromosome	strand	relationship_phrase	reference_biosequence	represented_by_biosequence_id	group_number	seq_unique_prots_in_group	protein_group_seq_align_link	is_keratin	is_immunoglobulin	biosequence_description	organism_full_name
A0A0G3F7Z2	RXN09585.1	NADH-ubiquinone oxidoreductase chain 4 (EC 7.1.1.2)	C	canonical	0.999	0	9	0	3								A0A0G3F7Z2	1	1				tr|A0A0G3F7Z2|A0A0G3F7Z2_LABRO NADH-ubiquinone oxidoreductase chain 4 OS=Labeo rohita OX=84645 GN=ND4 PE=3 SV=1	Labeo rohita
A0A172E1Q5	RXN17665.1	NAD(P)H dehydrogenase [quinone] 1-like protein (NAD(P)H quinone oxidoreductase 1)	C	canonical	1	0	382	0	17								A0A172E1Q5	2	1				tr|A0A172E1Q5|A0A172E1Q5_LABRO NAD(P)H dehydrogenase [quinone] 1-like protein OS=Labeo rohita OX=84645 GN=NADPHQ1 PE=2 SV=1	Labeo rohita
A0A498L1A3	RXN25870.1	E3 ubiquitin-ligase CHIP	C	indistinguishable representative	1	0	141	0	31								A0A498L1A3	3	2				tr|A0A498L1A3|A0A498L1A3_LABRO E3 ubiquitin-ligase CHIP OS=Labeo rohita OX=84645 GN=ROHU_013821 PE=4 SV=1	Labeo rohita
A0A498L1B2	RXN25879.1	TBC1 domain family member 24-like isoform X1	C	canonical	1	0	290	0	26								A0A498L1B2	4	1				tr|A0A498L1B2|A0A498L1B2_LABRO TBC1 domain family member 24-like isoform X1 OS=Labeo rohita OX=84645 GN=ROHU_013831 PE=4 SV=1	Labeo rohita
A0A498L1C4	RXN21846.1	Protein FAM234A-like	C	indistinguishable representative	0.999	0	25	0	10								A0A498L1C4	5	2				tr|A0A498L1C4|A0A498L1C4_LABRO Protein FAM234A-like OS=Labeo rohita OX=84645 GN=ROHU_006923 PE=4 SV=1	Labeo rohita
A0A498L1G4	RXN02280.1	ABHD8-like isoform X1	C	weak	0.919	0	1	0	1								A0A498L1G4	6	2				tr|A0A498L1G4|A0A498L1G4_LABRO ABHD8-like isoform X1 OS=Labeo rohita OX=84645 GN=ROHU_035084 PE=4 SV=1	Labeo rohita
A0A498L1H3		C-C motif chemokine 25-like protein	C	weak	0.999	0	2	0	1								A0A498L1H3	7	2				tr|A0A498L1H3|A0A498L1H3_LABRO C-C motif chemokine 25-like protein OS=Labeo rohita OX=84645 GN=ROHU_035094 PE=4 SV=1	Labeo rohita
A0A498L1H8		tRNA modification GTPase mitochondrial isoform X1	C	weak	0.836	0	1	0	1								A0A498L1H8	8	2				tr|A0A498L1H8|A0A498L1H8_LABRO tRNA modification GTPase mitochondrial isoform X1 OS=Labeo rohita OX=84645 GN=ROHU_035086 PE=3 SV=1	Labeo rohita
A0A498L1I1	RXN02300.1	Cytoskeleton-associated 4	C	canonical	1	0	173	0	19								A0A498L1I1	9	3				tr|A0A498L1I1|A0A498L1I1_LABRO Cytoskeleton-associated 4 OS=Labeo rohita OX=84645 GN=ROHU_013806 PE=4 SV=1	Labeo rohita
A0A498NT67	RXN34724.1	Cytoskeleton-associated 4	C	canonical	1	0	147	0	19								A0A498L1I1	9	3				tr|A0A498NT67|A0A498NT67_LABRO Cytoskeleton-associated 4 OS=Labeo rohita OX=84645 GN=ROHU_014809 PE=4 SV=1	Labeo rohita
A0A498L1L1	RXN02321.1	VIP36	C	canonical	1	0	185	0	15								A0A498L1L1	10	4				tr|A0A498L1L1|A0A498L1L1_LABRO VIP36 OS=Labeo rohita OX=84645 GN=ROHU_023652 PE=4 SV=1	Labeo rohita
A0A498LSY4	RXN09874.1	VIP36 isoform X2	C	representative	1	0	21	0	9								A0A498L1L1	10	4				tr|A0A498LSY4|A0A498LSY4_LABRO VIP36 isoform X2 OS=Labeo rohita OX=84645 GN=ROHU_010945 PE=4 SV=1	Labeo rohita
A0A498L1P6	RXN02360.1	Myotubularin-related 9	C	canonical	0.999	0	22	0	8								A0A498L1P6	11	2				tr|A0A498L1P6|A0A498L1P6_LABRO Myotubularin-related 9 OS=Labeo rohita OX=84645 GN=ROHU_028162 PE=4 SV=1	Labeo rohita
A0A498NBJ2	RXN29873.1	Myotubularin-related 9-like isoform X1	C	canonical	0.997	0	11	0	5								A0A498L1P6	11	2				tr|A0A498NBJ2|A0A498NBJ2_LABRO Myotubularin-related 9-like isoform X1 OS=Labeo rohita OX=84645 GN=ROHU_036252 PE=4 SV=1	Labeo rohita
A0A498L1V5	RXN02401.1	Proteasomal ubiquitin receptor ADRM1 isoform X2	C	indistinguishable representative	0.999	0	80	0	5								A0A498L1V5	12	2				tr|A0A498L1V5|A0A498L1V5_LABRO Proteasomal ubiquitin receptor ADRM1 isoform X2 OS=Labeo rohita OX=84645 GN=ROHU_035032 PE=4 SV=1	Labeo rohita
A0A498L1Y8	RXN02450.1	Limbic system-associated membrane-like protein	C	insufficient evidence	0.952	0	1	0	1								A0A498L1Y8	13	1				tr|A0A498L1Y8|A0A498L1Y8_LABRO Limbic system-associated membrane-like protein OS=Labeo rohita OX=84645 GN=ROHU_035016 PE=4 SV=1	Labeo rohita
A0A498L1Z8	RXN02441.1	T-cell surface glyco CD3 epsilon chain	C	weak	0.998	0	1	0	1								A0A498L1Z8	14	1				tr|A0A498L1Z8|A0A498L1Z8_LABRO T-cell surface glyco CD3 epsilon chain OS=Labeo rohita OX=84645 GN=ROHU_035007 PE=4 SV=1	Labeo rohita
A0A498L220	RXN02461.1	Phosphodiesterase (EC 3.1.4.-)	C	representative	0.999	0	57	0	20								A0A498L220	15	3				tr|A0A498L220|A0A498L220_LABRO Phosphodiesterase OS=Labeo rohita OX=84645 GN=ROHU_013762 PE=3 SV=1	Labeo rohita
A0A498L227	RXN02492.1	THEMIS2-like protein	C	indistinguishable representative	0.997	0	4	0	3								A0A498L227	16	2				tr|A0A498L227|A0A498L227_LABRO THEMIS2-like protein OS=Labeo rohita OX=84645 GN=ROHU_013750 PE=4 SV=1	Labeo rohita
A0A498L246		NYNRIN-like protein	C	weak	0.801	0	1	0	1								A0A498L246	17	1				tr|A0A498L246|A0A498L246_LABRO NYNRIN-like protein OS=Labeo rohita OX=84645 GN=ROHU_013734 PE=4 SV=1	Labeo rohita
A0A498L276	RXN26627.1	Putative basic-leucine zipper transcription factor H	C	canonical	0.999	0	20	0	6								A0A498L276	18	1				tr|A0A498L276|A0A498L276_LABRO Putative basic-leucine zipper transcription factor H OS=Labeo rohita OX=84645 GN=ROHU_005681 PE=4 SV=1	Labeo rohita
A0A498L292		Glypican-6-like isoform X2	C	weak	0.983	0	1	0	1								A0A498L292	19	1				tr|A0A498L292|A0A498L292_LABRO Glypican-6-like isoform X2 OS=Labeo rohita OX=84645 GN=ROHU_034902 PE=3 SV=1	Labeo rohita
A0A498L2B0	RXN02572.1	Uncharacterized protein	C	canonical	1	0	12	0	7								A0A498L2B0	20	1				tr|A0A498L2B0|A0A498L2B0_LABRO Uncharacterized protein OS=Labeo rohita OX=84645 GN=ROHU_015772 PE=4 SV=1	Labeo rohita
A0A498L2C1	RXN02582.1	Leucine-rich repeat-containing 4B	C	indistinguishable representative	0.999	0	17	0	7								A0A498L2C1	21	2				tr|A0A498L2C1|A0A498L2C1_LABRO Leucine-rich repeat-containing 4B OS=Labeo rohita OX=84645 GN=ROHU_034932 PE=4 SV=1	Labeo rohita
A0A498L2D3	RXN33153.1	Branched-chain-amino-acid aminotransferase (EC 2.6.1.42)	C	canonical	1	0	582	0	29								A0A498L2D3	22	1				tr|A0A498L2D3|A0A498L2D3_LABRO Branched-chain-amino-acid aminotransferase OS=Labeo rohita OX=84645 GN=ROHU_015752 PE=3 SV=1	Labeo rohita
A0A498L2E3	RXN33201.1	Liprin-alpha-3-like isoform X1	C	canonical	0.999	0	270	0	45								A0A498L2E3	23	10				tr|A0A498L2E3|A0A498L2E3_LABRO Liprin-alpha-3-like isoform X1 OS=Labeo rohita OX=84645 GN=ROHU_035858 PE=4 SV=1	Labeo rohita
A0A498L310		Liprin-alpha-3-like isoform X1	C	indistinguishable representative	0.999	0	39	0	7								A0A498L2E3	23	10				tr|A0A498L310|A0A498L310_LABRO Liprin-alpha-3-like isoform X1 OS=Labeo rohita OX=84645 GN=ROHU_034939 PE=4 SV=1	Labeo rohita
A0A498LE25	RXN06539.1	Liprin-alpha-2-like isoform X1	C	canonical	0.999	0	56	0	18								A0A498L2E3	23	10				tr|A0A498LE25|A0A498LE25_LABRO Liprin-alpha-2-like isoform X1 OS=Labeo rohita OX=84645 GN=ROHU_032773 PE=4 SV=1	Labeo rohita
A0A498LKA0		Liprin-alpha-1-like isoform X1	C	marginally distinguished	0.999	0	29	0	4								A0A498L2E3	23	10				tr|A0A498LKA0|A0A498LKA0_LABRO Liprin-alpha-1-like isoform X1 OS=Labeo rohita OX=84645 GN=ROHU_011347 PE=4 SV=1	Labeo rohita
A0A498LKM7		Liprin-alpha-1-like isoform X1	C	marginally distinguished	0.999	0	34	0	6								A0A498L2E3	23	10				tr|A0A498LKM7|A0A498LKM7_LABRO Liprin-alpha-1-like isoform X1 OS=Labeo rohita OX=84645 GN=ROHU_035301 PE=4 SV=1	Labeo rohita
A0A498LVU0	RXN10974.1	Liprin-alpha-2-like isoform X1	C	canonical	0.999	0	17	0	4								A0A498L2E3	23	10				tr|A0A498LVU0|A0A498LVU0_LABRO Liprin-alpha-2-like isoform X1 OS=Labeo rohita OX=84645 GN=ROHU_030322 PE=4 SV=1	Labeo rohita
A0A498LZZ7	RXN10975.1	Liprin-alpha-2-like isoform X1	C	canonical	0.999	0	45	0	13								A0A498L2E3	23	10				tr|A0A498LZZ7|A0A498LZZ7_LABRO Liprin-alpha-2-like isoform X1 OS=Labeo rohita OX=84645 GN=ROHU_030323 PE=4 SV=1	Labeo rohita
A0A498L2E4	RXN33165.1	Kinase C and casein kinase substrate in neurons 3-like protein	C	canonical	0.999	0	86	0	15								A0A498L2E4	24	2				tr|A0A498L2E4|A0A498L2E4_LABRO Kinase C and casein kinase substrate in neurons 3-like protein OS=Labeo rohita OX=84645 GN=ROHU_015764 PE=4 SV=1	Labeo rohita
A0A498L453	RXN25893.1	Leucine-rich repeat-containing 4B-like protein	C	canonical	0.999	0	56	0	11								A0A498L2E4	24	2				tr|A0A498L453|A0A498L453_LABRO Leucine-rich repeat-containing 4B-like protein OS=Labeo rohita OX=84645 GN=ROHU_013844 PE=4 SV=1	Labeo rohita
A0A498L2E9	RXN02610.1	Protein FAM171A2-like	C	indistinguishable representative	0.999	0	37	0	12								A0A498L2E9	25	2				tr|A0A498L2E9|A0A498L2E9_LABRO Protein FAM171A2-like OS=Labeo rohita OX=84645 GN=ROHU_034786 PE=4 SV=1	Labeo rohita
A0A498L2F0	RXN11228.1	Monocarboxylate transporter 2-like protein	C	canonical	0.999	0	50	0	10								A0A498L2F0	26	1				tr|A0A498L2F0|A0A498L2F0_LABRO Monocarboxylate transporter 2-like protein OS=Labeo rohita OX=84645 GN=ROHU_030174 PE=4 SV=1	Labeo rohita
A0A498L2F6	RXN33154.1	17-beta-hydroxysteroid dehydrogenase 14	C	canonical	1	0	62	0	16								A0A498L2F6	27	2				tr|A0A498L2F6|A0A498L2F6_LABRO 17-beta-hydroxysteroid dehydrogenase 14 OS=Labeo rohita OX=84645 GN=ROHU_015753 PE=4 SV=1	Labeo rohita
A0A498L2G4	RXN02601.1	Nucleobindin-1-like protein	C	indistinguishable representative	0.999	0	13	0	5								A0A498L2G4	28	2				tr|A0A498L2G4|A0A498L2G4_LABRO Nucleobindin-1-like protein OS=Labeo rohita OX=84645 GN=ROHU_035857 PE=4 SV=1	Labeo rohita
A0A498L2H2	RXN02611.1	Dephospho-kinase domain-containing	C	canonical	0.999	0	14	0	5								A0A498L2H2	29	1				tr|A0A498L2H2|A0A498L2H2_LABRO Dephospho-kinase domain-containing OS=Labeo rohita OX=84645 GN=ROHU_006872 PE=3 SV=1	Labeo rohita
A0A498L2J1		Synaptosomal-associated 29	C	indistinguishable representative	0.97	0	2	0	2								A0A498L2J1	30	2				tr|A0A498L2J1|A0A498L2J1_LABRO Synaptosomal-associated 29 OS=Labeo rohita OX=84645 GN=ROHU_013788 PE=4 SV=1	Labeo rohita
A0A498L2J6	RXN02631.1	N-acetyltransferase ESCO1 isoform X1	C	indistinguishable representative	0.967	0	2	0	2								A0A498L2J6	31	2				tr|A0A498L2J6|A0A498L2J6_LABRO N-acetyltransferase ESCO1 isoform X1 OS=Labeo rohita OX=84645 GN=ROHU_034807 PE=4 SV=1	Labeo rohita
A0A498L2L0	RXN02459.1	Neuromodulin-like isoform X1	C	canonical	0.999	0	34	0	2								A0A498L2L0	32	1				tr|A0A498L2L0|A0A498L2L0_LABRO Neuromodulin-like isoform X1 OS=Labeo rohita OX=84645 GN=ROHU_035878 PE=4 SV=1	Labeo rohita
A0A498L2M0	RXN02368.1	Ectonucleotide pyrophosphatase phosphodiesterase family member 5	C	indistinguishable representative	0.959	0	5	0	2								A0A498L2M0	33	2				tr|A0A498L2M0|A0A498L2M0_LABRO Ectonucleotide pyrophosphatase phosphodiesterase family member 5 OS=Labeo rohita OX=84645 GN=ROHU_035058 PE=4 SV=1	Labeo rohita
A0A498L2N3	RXN02479.1	Hyaluronan and proteoglycan link 1-like protein	C	canonical	1	0	755	0	36								A0A498L2N3	34	4				tr|A0A498L2N3|A0A498L2N3_LABRO Hyaluronan and proteoglycan link 1-like protein OS=Labeo rohita OX=84645 GN=ROHU_034982 PE=4 SV=1	Labeo rohita
A0A498MJW1	RXN19624.1	Hyaluronan and proteoglycan link 3-like protein	C	canonical	1	0	125	0	6								A0A498L2N3	34	4				tr|A0A498MJW1|A0A498MJW1_LABRO Hyaluronan and proteoglycan link 3-like protein OS=Labeo rohita OX=84645 GN=ROHU_007209 PE=4 SV=1	Labeo rohita
A0A498MM10	RXN20404.1	Hyaluronan and proteoglycan link 4	C	canonical	0.999	0	21	0	8								A0A498L2N3	34	4				tr|A0A498MM10|A0A498MM10_LABRO Hyaluronan and proteoglycan link 4 OS=Labeo rohita OX=84645 GN=ROHU_024954 PE=4 SV=1	Labeo rohita
A0A498NQ29	RXN34075.1	Hyaluronan and proteoglycan link 1-like isoform X1	C	canonical	1	0	764	0	39								A0A498L2N3	34	4				tr|A0A498NQ29|A0A498NQ29_LABRO Hyaluronan and proteoglycan link 1-like isoform X1 OS=Labeo rohita OX=84645 GN=ROHU_002523 PE=4 SV=1	Labeo rohita
A0A498L2N5		Emerin-like protein	C	indistinguishable representative	0.999	0	21	0	2								A0A498L2N5	35	2				tr|A0A498L2N5|A0A498L2N5_LABRO Emerin-like protein OS=Labeo rohita OX=84645 GN=ROHU_034858 PE=4 SV=1	Labeo rohita
A0A498L2N8		Coiled-coil domain-containing protein 115	C	weak	0.999	0	6	0	1								A0A498L2N8	36	2				tr|A0A498L2N8|A0A498L2N8_LABRO Coiled-coil domain-containing protein 115 OS=Labeo rohita OX=84645 GN=ROHU_034876 PE=4 SV=1	Labeo rohita
A0A498L2P4		Dynein heavy chain axonemal	C	indistinguishable representative	0.925	0	2	0	2								A0A498L2P4	37	2				tr|A0A498L2P4|A0A498L2P4_LABRO Dynein heavy chain axonemal OS=Labeo rohita OX=84645 GN=ROHU_034868 PE=4 SV=1	Labeo rohita
A0A498L2R3	RXN02720.1	28S ribosomal mitochondrial	C	canonical	1	0	58	0	16								A0A498L2R3	38	1				tr|A0A498L2R3|A0A498L2R3_LABRO 28S ribosomal mitochondrial OS=Labeo rohita OX=84645 GN=ROHU_014630 PE=4 SV=1	Labeo rohita
A0A498L2R8	RXN02701.1	3-beta-hydroxysteroid-Delta(8), Delta(7)-isomerase	C	representative	0.999	0	91	0	3								A0A498L2R8	39	1				tr|A0A498L2R8|A0A498L2R8_LABRO 3-beta-hydroxysteroid-Delta(8), Delta(7)-isomerase OS=Labeo rohita OX=84645 GN=ROHU_034877 PE=4 SV=1	Labeo rohita
A0A498L2U2	RXN02438.1	SID1 transmembrane family member 2 isoform X1	C	canonical	0.998	0	74	0	4								A0A498L2U2	40	1				tr|A0A498L2U2|A0A498L2U2_LABRO SID1 transmembrane family member 2 isoform X1 OS=Labeo rohita OX=84645 GN=ROHU_035004 PE=4 SV=1	Labeo rohita
A0A498L2V9	RXN02760.1	T-complex 1 subunit alpha	C	canonical	1	0	1357	0	32								A0A498L2V9	41	1				tr|A0A498L2V9|A0A498L2V9_LABRO T-complex 1 subunit alpha OS=Labeo rohita OX=84645 GN=ROHU_013623 PE=4 SV=1	Labeo rohita
A0A498L2W0		Complement C1q tumor necrosis factor-related 7	C	weak	0.748	0	1	0	1								A0A498L2W0	42	1				tr|A0A498L2W0|A0A498L2W0_LABRO Complement C1q tumor necrosis factor-related 7 OS=Labeo rohita OX=84645 GN=ROHU_013625 PE=4 SV=1	Labeo rohita
A0A498L2W1		Protein FAM134A	C	weak	0.987	0	9	0	1								A0A498L2W1	43	2				tr|A0A498L2W1|A0A498L2W1_LABRO Protein FAM134A OS=Labeo rohita OX=84645 GN=ROHU_035843 PE=4 SV=1	Labeo rohita
A0A498L2Y3	RXN02761.1	Pleckstrin homology domain-containing family G member 1-like isoform X2	C	canonical	0.999	0	14	0	8								A0A498L2Y3	44	1				tr|A0A498L2Y3|A0A498L2Y3_LABRO Pleckstrin homology domain-containing family G member 1-like isoform X2 OS=Labeo rohita OX=84645 GN=ROHU_013624 PE=4 SV=1	Labeo rohita
A0A498L2Z0		Cadherin 26	C	weak	0.989	0	1	0	1								A0A498L2Z0	45	1				tr|A0A498L2Z0|A0A498L2Z0_LABRO Cadherin 26 OS=Labeo rohita OX=84645 GN=ROHU_013645 PE=4 SV=1	Labeo rohita
A0A498L2Z1	RXN02771.1	Serine-rich adhesin for platelets-like protein	C	canonical	0.997	0	4	0	4								A0A498L2Z1	46	1				tr|A0A498L2Z1|A0A498L2Z1_LABRO Serine-rich adhesin for platelets-like protein OS=Labeo rohita OX=84645 GN=ROHU_013634 PE=4 SV=1	Labeo rohita
A0A498L309	RXN02802.1	Cyclic AMP-responsive element-binding 1-like protein	C	canonical	0.999	0	31	0	5								A0A498L309	47	4				tr|A0A498L309|A0A498L309_LABRO Cyclic AMP-responsive element-binding 1-like protein OS=Labeo rohita OX=84645 GN=ROHU_013665 PE=4 SV=1	Labeo rohita
A0A498LB71	RXN08035.1	Cyclic AMP-dependent transcription factor ATF-1-like protein	C	marginally distinguished	0.999	0	14	0	3								A0A498L309	47	4				tr|A0A498LB71|A0A498LB71_LABRO Cyclic AMP-dependent transcription factor ATF-1-like protein OS=Labeo rohita OX=84645 GN=ROHU_011721 PE=4 SV=1	Labeo rohita
A0A498NEM9	RXN29025.1	Cyclic AMP-responsive element-binding 1	C	marginally distinguished	0.998	0	16	0	4								A0A498L309	47	4				tr|A0A498NEM9|A0A498NEM9_LABRO Cyclic AMP-responsive element-binding 1 OS=Labeo rohita OX=84645 GN=ROHU_018754 PE=4 SV=1	Labeo rohita
A0A498L311	RXN02790.1	Translationally-controlled tumor-like protein	C	canonical	1	0	741	0	23								A0A498L311	48	1				tr|A0A498L311|A0A498L311_LABRO Translationally-controlled tumor-like protein OS=Labeo rohita OX=84645 GN=ROHU_013653 PE=3 SV=1	Labeo rohita
A0A498L318	RXN02801.1	Charged multivesicular body 2b	C	canonical	1	0	52	0	6								A0A498L318	49	1				tr|A0A498L318|A0A498L318_LABRO Charged multivesicular body 2b OS=Labeo rohita OX=84645 GN=ROHU_013664 PE=4 SV=1	Labeo rohita
A0A498L319	RXN02812.1	Pseudouridine-5-phosphatase	C	canonical	1	0	140	0	13								A0A498L319	50	1				tr|A0A498L319|A0A498L319_LABRO Pseudouridine-5-phosphatase OS=Labeo rohita OX=84645 GN=ROHU_013675 PE=4 SV=1	Labeo rohita
A0A498L320	RXN02599.1	Serine threonine-kinase SMG1 isoform X2	C	indistinguishable representative	0.999	0	138	0	25								A0A498L320	51	2				tr|A0A498L320|A0A498L320_LABRO Serine threonine-kinase SMG1 isoform X2 OS=Labeo rohita OX=84645 GN=ROHU_035855 PE=3 SV=1	Labeo rohita
A0A498L335	RXN02821.1	Regulating synaptic membrane exocytosis 1-like protein	C	canonical	0.999	0	14	0	7								A0A498L335	52	7				tr|A0A498L335|A0A498L335_LABRO Regulating synaptic membrane exocytosis 1-like protein OS=Labeo rohita OX=84645 GN=ROHU_013684 PE=4 SV=1	Labeo rohita
A0A498LBS9		Regulating synaptic membrane exocytosis 2 isoform X3	C	marginally distinguished	0.999	0	6	0	3								A0A498L335	52	7				tr|A0A498LBS9|A0A498LBS9_LABRO Regulating synaptic membrane exocytosis 2 isoform X3 OS=Labeo rohita OX=84645 GN=ROHU_013547 PE=4 SV=1	Labeo rohita
A0A498LEY5	RXN06622.1	Regulating synaptic membrane exocytosis 3	C	marginally distinguished	0.999	0	41	0	13								A0A498L335	52	7				tr|A0A498LEY5|A0A498LEY5_LABRO Regulating synaptic membrane exocytosis 3 OS=Labeo rohita OX=84645 GN=ROHU_032694 PE=4 SV=1	Labeo rohita
A0A498MVF7		Regulating synaptic membrane exocytosis 1-like isoform X2	C	representative	0.999	0	37	0	20								A0A498L335	52	7				tr|A0A498MVF7|A0A498MVF7_LABRO Regulating synaptic membrane exocytosis 1-like isoform X2 OS=Labeo rohita OX=84645 GN=ROHU_036670 PE=4 SV=1	Labeo rohita
A0A498NFV6	RXN30708.1	Regulating synaptic membrane exocytosis 1-like isoform X2	C	representative	0.999	0	38	0	21								A0A498L335	52	7				tr|A0A498NFV6|A0A498NFV6_LABRO Regulating synaptic membrane exocytosis 1-like isoform X2 OS=Labeo rohita OX=84645 GN=ROHU_036218 PE=4 SV=1	Labeo rohita
A0A498L342		Dachshund-like protein	C	weak	0.9	0	1	0	1								A0A498L342	53	5				tr|A0A498L342|A0A498L342_LABRO Dachshund-like protein OS=Labeo rohita OX=84645 GN=ROHU_013694 PE=4 SV=1	Labeo rohita
A0A498L371	RXN02840.1	Transmembrane 9 superfamily member	C	canonical	0.999	0	45	0	6								A0A498L371	54	1				tr|A0A498L371|A0A498L371_LABRO Transmembrane 9 superfamily member OS=Labeo rohita OX=84645 GN=ROHU_013703 PE=3 SV=1	Labeo rohita
A0A498L383	RXN02850.1	Putative cysteine--tRNA mitochondrial isoform X1	C	canonical	0.984	0	9	0	2								A0A498L383	55	1				tr|A0A498L383|A0A498L383_LABRO Putative cysteine--tRNA mitochondrial isoform X1 OS=Labeo rohita OX=84645 GN=ROHU_013713 PE=3 SV=1	Labeo rohita
A0A498L395	RXN02892.1	TSSC4-like protein	C	weak	0.998	0	4	0	1								A0A498L395	56	2				tr|A0A498L395|A0A498L395_LABRO TSSC4-like protein OS=Labeo rohita OX=84645 GN=ROHU_034734 PE=4 SV=1	Labeo rohita
A0A498L3A3		Zinc finger CCCH domain-containing 13-like protein	C	weak	0.97	0	1	0	1								A0A498L3A3	57	1				tr|A0A498L3A3|A0A498L3A3_LABRO Zinc finger CCCH domain-containing 13-like protein OS=Labeo rohita OX=84645 GN=ROHU_035841 PE=4 SV=1	Labeo rohita
A0A498L3C2	RXN02598.1	Dedicator of cytokinesis 1	C	indistinguishable representative	0.983	0	3	0	2								A0A498L3C2	58	2				tr|A0A498L3C2|A0A498L3C2_LABRO Dedicator of cytokinesis 1 OS=Labeo rohita OX=84645 GN=ROHU_035854 PE=3 SV=1	Labeo rohita
A0A498L3H8		Protein-S-isoprenylcysteine O-methyltransferase (EC 2.1.1.100)	C	weak	0.807	0	1	0	1								A0A498L3H8	59	1				tr|A0A498L3H8|A0A498L3H8_LABRO Protein-S-isoprenylcysteine O-methyltransferase OS=Labeo rohita OX=84645 GN=ROHU_023495 PE=3 SV=1	Labeo rohita
A0A498L3J8	RXN07751.1	Protein-tyrosine-phosphatase (EC 3.1.3.48)	C	weak	0.984	0	4	0	1								A0A498L3J8	60	1				tr|A0A498L3J8|A0A498L3J8_LABRO Protein-tyrosine-phosphatase OS=Labeo rohita OX=84645 GN=ROHU_013632 PE=4 SV=1	Labeo rohita
A0A498L3L5	RXN02789.1	OX-2 membrane glyco-like protein	C	canonical	0.999	0	12	0	4								A0A498L3L5	61	1				tr|A0A498L3L5|A0A498L3L5_LABRO OX-2 membrane glyco-like protein OS=Labeo rohita OX=84645 GN=ROHU_013652 PE=4 SV=1	Labeo rohita
A0A498L3R0	RXN02728.1	Bifunctional coenzyme A synthase	C	canonical	1	0	126	0	22								A0A498L3R0	62	2				tr|A0A498L3R0|A0A498L3R0_LABRO Bifunctional coenzyme A synthase OS=Labeo rohita OX=84645 GN=ROHU_035847 PE=3 SV=1	Labeo rohita
A0A498L3R2	RXN02839.1	Propionyl-carboxylase alpha mitochondrial	C	canonical	1	0	1134	0	55								A0A498L3R2	63	2				tr|A0A498L3R2|A0A498L3R2_LABRO Propionyl-carboxylase alpha mitochondrial OS=Labeo rohita OX=84645 GN=ROHU_013702 PE=4 SV=1	Labeo rohita
A0A498MVF3	RXN24481.1	Methylcrotonoyl-carboxylase subunit mitochondrial	C	canonical	1	0	568	0	39								A0A498L3R2	63	2				tr|A0A498MVF3|A0A498MVF3_LABRO Methylcrotonoyl-carboxylase subunit mitochondrial OS=Labeo rohita OX=84645 GN=ROHU_006118 PE=3 SV=1	Labeo rohita
A0A498L3R4	RXN30074.1	Sodium-coupled monocarboxylate transporter 2	C	canonical	0.972	0	2	0	2								A0A498L3R4	64	1				tr|A0A498L3R4|A0A498L3R4_LABRO Sodium-coupled monocarboxylate transporter 2 OS=Labeo rohita OX=84645 GN=ROHU_017967 PE=3 SV=1	Labeo rohita
A0A498L3T1	RXN03062.1	Retinoblastoma 2 isoform X1	C	indistinguishable representative	0.998	0	3	0	2								A0A498L3T1	65	2				tr|A0A498L3T1|A0A498L3T1_LABRO Retinoblastoma 2 isoform X1 OS=Labeo rohita OX=84645 GN=ROHU_034648 PE=4 SV=1	Labeo rohita
A0A498L3Z8	RXN02949.1	Presequence mitochondrial	C	canonical	1	0	215	0	36								A0A498L3Z8	66	1				tr|A0A498L3Z8|A0A498L3Z8_LABRO Presequence mitochondrial OS=Labeo rohita OX=84645 GN=ROHU_013589 PE=4 SV=1	Labeo rohita
A0A498L404	RXN02828.1	Exosome complex exonuclease RRP44	C	canonical	0.998	0	26	0	4								A0A498L404	67	1				tr|A0A498L404|A0A498L404_LABRO Exosome complex exonuclease RRP44 OS=Labeo rohita OX=84645 GN=ROHU_013691 PE=3 SV=1	Labeo rohita
A0A498L417	RXN03120.1	Solute carrier family 22 member 4-like protein	C	weak	0.936	0	1	0	1								A0A498L417	68	2				tr|A0A498L417|A0A498L417_LABRO Solute carrier family 22 member 4-like protein OS=Labeo rohita OX=84645 GN=ROHU_034706 PE=4 SV=1	Labeo rohita
A0A498L429	RXN03130.1	Splicing factor 3A subunit 3	C	indistinguishable representative	1	0	64	0	14								A0A498L429	69	8				tr|A0A498L429|A0A498L429_LABRO Splicing factor 3A subunit 3 OS=Labeo rohita OX=84645 GN=ROHU_035823 PE=4 SV=1	Labeo rohita
A0A498L461	RXN03201.1	Zinc finger ZIC 2-like protein	C	representative	0.998	0	4	0	2								A0A498L461	70	5				tr|A0A498L461|A0A498L461_LABRO Zinc finger ZIC 2-like protein OS=Labeo rohita OX=84645 GN=ROHU_018693 PE=4 SV=1	Labeo rohita
A0A498L4N9		Zinc finger ZIC 5	C	indistinguishable representative	0.998	0	4	0	2								A0A498L461	70	5				tr|A0A498L4N9|A0A498L4N9_LABRO Zinc finger ZIC 5 OS=Labeo rohita OX=84645 GN=ROHU_034492 PE=4 SV=1	Labeo rohita
A0A498L471	RXN03211.1	Uncharacterized protein	C	canonical	1	0	33	0	5								A0A498L471	71	1				tr|A0A498L471|A0A498L471_LABRO Uncharacterized protein OS=Labeo rohita OX=84645 GN=ROHU_034504 PE=4 SV=1	Labeo rohita
A0A498L484	RXN02908.1	RelA-associated inhibitor isoform X1	C	canonical	0.962	0	4	0	2								A0A498L484	72	1				tr|A0A498L484|A0A498L484_LABRO RelA-associated inhibitor isoform X1 OS=Labeo rohita OX=84645 GN=ROHU_034750 PE=4 SV=1	Labeo rohita
A0A498L494	RXN03222.1	Catechol O-methyltransferase-like protein	C	representative	1	0	289	0	23								A0A498L494	73	2				tr|A0A498L494|A0A498L494_LABRO Catechol O-methyltransferase-like protein OS=Labeo rohita OX=84645 GN=ROHU_034515 PE=4 SV=1	Labeo rohita
A0A498L497	RXN03190.1	COMM domain-containing 6	C	canonical	0.999	0	28	0	4								A0A498L497	74	2				tr|A0A498L497|A0A498L497_LABRO COMM domain-containing 6 OS=Labeo rohita OX=84645 GN=ROHU_034483 PE=4 SV=1	Labeo rohita
A0A498L4B6	RXN34733.1	ADP-ribosylation factor GTPase-activating 3	C	canonical	1	0	107	0	24								A0A498L4B6	75	1				tr|A0A498L4B6|A0A498L4B6_LABRO ADP-ribosylation factor GTPase-activating 3 OS=Labeo rohita OX=84645 GN=ROHU_035888 PE=4 SV=1	Labeo rohita
A0A498L4C2	RXN03079.1	YccV-like domain-containing protein	C	representative	0.999	0	12	0	4								A0A498L4C2	76	2				tr|A0A498L4C2|A0A498L4C2_LABRO YccV-like domain-containing protein OS=Labeo rohita OX=84645 GN=ROHU_034665 PE=4 SV=1	Labeo rohita
A0A498L4C7		Glutamate receptor delta-1-like isoform X3	C	weak	0.867	0	1	0	1								A0A498L4C7	77	1				tr|A0A498L4C7|A0A498L4C7_LABRO Glutamate receptor delta-1-like isoform X3 OS=Labeo rohita OX=84645 GN=ROHU_013598 PE=3 SV=1	Labeo rohita
A0A498L4D0	RXN03089.1	DnaJ-like protein	C	canonical	0.999	0	43	0	9								A0A498L4D0	78	2				tr|A0A498L4D0|A0A498L4D0_LABRO DnaJ-like protein OS=Labeo rohita OX=84645 GN=ROHU_034675 PE=4 SV=1	Labeo rohita
A0A498N2W1	RXN23087.1	DnaJ-like protein	C	canonical	0.998	0	24	0	6								A0A498L4D0	78	2				tr|A0A498N2W1|A0A498N2W1_LABRO DnaJ-like protein OS=Labeo rohita OX=84645 GN=ROHU_006484 PE=4 SV=1	Labeo rohita
A0A498L4E2	RXN03240.1	Ubiquitin carboxyl-terminal hydrolase (EC 3.4.19.12)	C	indistinguishable representative	0.999	0	11	0	8								A0A498L4E2	79	2				tr|A0A498L4E2|A0A498L4E2_LABRO Ubiquitin carboxyl-terminal hydrolase OS=Labeo rohita OX=84645 GN=ROHU_035815 PE=3 SV=1	Labeo rohita
A0A498L4F1	RXN03250.1	Glyceraldehyde-3-phosphate testis-specific	C	canonical	1	0	11372	0	197								A0A498L4F1	80	4				tr|A0A498L4F1|A0A498L4F1_LABRO Glyceraldehyde-3-phosphate testis-specific OS=Labeo rohita OX=84645 GN=ROHU_013530 PE=3 SV=1	Labeo rohita
A0A498LYI7	RXN10465.1	Glyceraldehyde-3-phosphate dehydrogenase	C	marginally distinguished	1	0	26154	0	285								A0A498L4F1	80	4				tr|A0A498LYI7|A0A498LYI7_LABRO Glyceraldehyde-3-phosphate dehydrogenase OS=Labeo rohita OX=84645 GN=ROHU_010880 PE=3 SV=1	Labeo rohita
A0A498NN13		Glyceraldehyde-3-phosphate dehydrogenase	C	marginally distinguished	1	0	11248	0	124								A0A498L4F1	80	4				tr|A0A498NN13|A0A498NN13_LABRO Glyceraldehyde-3-phosphate dehydrogenase OS=Labeo rohita OX=84645 GN=ROHU_015632 PE=4 SV=1	Labeo rohita
A0A498L4J4	RXN03312.1	Lipocalin	C	indistinguishable representative	0.999	0	17	0	11								A0A498L4J4	81	2				tr|A0A498L4J4|A0A498L4J4_LABRO Lipocalin OS=Labeo rohita OX=84645 GN=ROHU_016865 PE=3 SV=1	Labeo rohita
A0A498L4K5	RXN03322.1	Sidekick-1-like isoform X2	C	weak	0.995	0	3	0	1								A0A498L4K5	82	2				tr|A0A498L4K5|A0A498L4K5_LABRO Sidekick-1-like isoform X2 OS=Labeo rohita OX=84645 GN=ROHU_034412 PE=4 SV=1	Labeo rohita
A0A498L4L7	RXN03310.1	MICOS complex subunit	C	canonical	1	0	73	0	13								A0A498L4L7	83	1				tr|A0A498L4L7|A0A498L4L7_LABRO MICOS complex subunit OS=Labeo rohita OX=84645 GN=ROHU_009506 PE=4 SV=1	Labeo rohita
A0A498L4N8	RXN03352.1	Rapunzel isoform X1	C	canonical	1	0	50	0	12								A0A498L4N8	84	2				tr|A0A498L4N8|A0A498L4N8_LABRO Rapunzel isoform X1 OS=Labeo rohita OX=84645 GN=ROHU_034442 PE=4 SV=1	Labeo rohita
A0A498L4Q7	RXN03350.1	Rapunzel isoform X1	C	canonical	0.999	0	38	0	9								A0A498L4N8	84	2				tr|A0A498L4Q7|A0A498L4Q7_LABRO Rapunzel isoform X1 OS=Labeo rohita OX=84645 GN=ROHU_034440 PE=4 SV=1	Labeo rohita
A0A498L4P8		Tumor necrosis factor alpha-induced 8 1 isoform X2	C	weak	0.994	0	2	0	1								A0A498L4P8	85	1				tr|A0A498L4P8|A0A498L4P8_LABRO Tumor necrosis factor alpha-induced 8 1 isoform X2 OS=Labeo rohita OX=84645 GN=ROHU_015961 PE=4 SV=1	Labeo rohita
A0A498L4S2	RXN32880.1	Zinc finger RNA-binding-like isoform X2	C	canonical	0.996	0	3	0	2								A0A498L4S2	86	1				tr|A0A498L4S2|A0A498L4S2_LABRO Zinc finger RNA-binding-like isoform X2 OS=Labeo rohita OX=84645 GN=ROHU_015959 PE=4 SV=1	Labeo rohita
A0A498L4V5	RXN03138.1	RNA polymerase II subunit A C-terminal domain phosphatase SSU72	C	canonical	0.999	0	47	0	8								A0A498L4V5	87	1				tr|A0A498L4V5|A0A498L4V5_LABRO RNA polymerase II subunit A C-terminal domain phosphatase SSU72 OS=Labeo rohita OX=84645 GN=ROHU_008108 PE=4 SV=1	Labeo rohita
A0A498L4V6	RXN03431.1	GTP-binding REM 2-like isoform X2	C	canonical	0.999	0	17	0	6								A0A498L4V6	88	1				tr|A0A498L4V6|A0A498L4V6_LABRO GTP-binding REM 2-like isoform X2 OS=Labeo rohita OX=84645 GN=ROHU_013450 PE=4 SV=1	Labeo rohita
A0A498L4V8	RXN02493.1	Replication A 32 kDa subunit	C	indistinguishable representative	1	0	114	0	13								A0A498L4V8	89	2				tr|A0A498L4V8|A0A498L4V8_LABRO Replication A 32 kDa subunit OS=Labeo rohita OX=84645 GN=ROHU_013751 PE=4 SV=1	Labeo rohita
A0A498L4W7	RXN30964.1	Homeobox and leucine zipper Homez	C	canonical	0.999	0	5	0	3								A0A498L4W7	90	1				tr|A0A498L4W7|A0A498L4W7_LABRO Homeobox and leucine zipper Homez OS=Labeo rohita OX=84645 GN=ROHU_013460 PE=4 SV=1	Labeo rohita
A0A498L4X4	RXN03432.1	Leucine-rich repeat-containing 16B-like protein	C	weak	0.935	0	2	0	1								A0A498L4X4	91	2				tr|A0A498L4X4|A0A498L4X4_LABRO Leucine-rich repeat-containing 16B-like protein OS=Labeo rohita OX=84645 GN=ROHU_013451 PE=4 SV=1	Labeo rohita
A0A498L4Y6	RXN03442.1	Dehydrogenase reductase SDR family member 1	C	canonical	1	0	467	0	34								A0A498L4Y6	92	2				tr|A0A498L4Y6|A0A498L4Y6_LABRO Dehydrogenase reductase SDR family member 1 OS=Labeo rohita OX=84645 GN=ROHU_013461 PE=4 SV=1	Labeo rohita
A0A498NGK5	RXN03443.1	Dehydrogenase reductase SDR family member 1	C	canonical	1	0	310	0	22								A0A498L4Y6	92	2				tr|A0A498NGK5|A0A498NGK5_LABRO Dehydrogenase reductase SDR family member 1 OS=Labeo rohita OX=84645 GN=ROHU_013462 PE=4 SV=1	Labeo rohita
A0A498L4Z1	RXN03430.1	Coatomer subunit beta	C	canonical	1	0	1281	0	80								A0A498L4Z1	93	1				tr|A0A498L4Z1|A0A498L4Z1_LABRO Coatomer subunit beta OS=Labeo rohita OX=84645 GN=ROHU_013449 PE=4 SV=1	Labeo rohita
A0A498L506	RXN16158.1	G-activated inward rectifier potassium channel 1-like protein	C	weak	0.979	0	1	0	1								A0A498L506	94	3				tr|A0A498L506|A0A498L506_LABRO G-activated inward rectifier potassium channel 1-like protein OS=Labeo rohita OX=84645 GN=ROHU_013481 PE=3 SV=1	Labeo rohita
A0A498L508	RXN03319.1	Nicalin-1-like isoform X3	C	canonical	1	0	147	0	14								A0A498L508	95	2				tr|A0A498L508|A0A498L508_LABRO Nicalin-1-like isoform X3 OS=Labeo rohita OX=84645 GN=ROHU_035187 PE=4 SV=1	Labeo rohita
A0A498NME5	RXN32884.1	Nicalin	C	canonical	1	0	143	0	13								A0A498L508	95	2				tr|A0A498NME5|A0A498NME5_LABRO Nicalin OS=Labeo rohita OX=84645 GN=ROHU_015963 PE=3 SV=1	Labeo rohita
A0A498L533	RXN03501.1	Forkhead box K1-like protein	C	canonical	1	0	42	0	14								A0A498L533	96	4				tr|A0A498L533|A0A498L533_LABRO Forkhead box K1-like protein OS=Labeo rohita OX=84645 GN=ROHU_013520 PE=4 SV=1	Labeo rohita
A0A498LMD2	RXN15943.1	Forkhead box K2-like isoform X2	C	representative	1	0	23	0	7								A0A498L533	96	4				tr|A0A498LMD2|A0A498LMD2_LABRO Forkhead box K2-like isoform X2 OS=Labeo rohita OX=84645 GN=ROHU_008540 PE=4 SV=1	Labeo rohita
A0A498L4M6	RXN03351.1	Rapunzel 3	C	marginally distinguished	1	0	29	0	8								A0A498L542	97	2				tr|A0A498L4M6|A0A498L4M6_LABRO Rapunzel 3 OS=Labeo rohita OX=84645 GN=ROHU_034441 PE=4 SV=1	Labeo rohita
A0A498L542	RXN03349.1	Rapunzel 3	C	canonical	1	0	38	0	11								A0A498L542	97	2				tr|A0A498L542|A0A498L542_LABRO Rapunzel 3 OS=Labeo rohita OX=84645 GN=ROHU_034439 PE=4 SV=1	Labeo rohita
A0A498L557	RXN03521.1	Vitamin D-binding-like protein	C	representative	1	0	785	0	34								A0A498L557	98	2				tr|A0A498L557|A0A498L557_LABRO Vitamin D-binding-like protein OS=Labeo rohita OX=84645 GN=ROHU_013336 PE=4 SV=1	Labeo rohita
A0A498L568	RXN31021.1	WW domain-containing oxidoreductase isoform X2	C	canonical	0.999	0	2	0	2								A0A498L568	99	1				tr|A0A498L568|A0A498L568_LABRO WW domain-containing oxidoreductase isoform X2 OS=Labeo rohita OX=84645 GN=ROHU_013346 PE=4 SV=1	Labeo rohita
A0A498L573	RXN03522.1	Anion exchange protein	C	canonical	0.999	0	355	0	33								A0A498L573	100	2				tr|A0A498L573|A0A498L573_LABRO Anion exchange protein OS=Labeo rohita OX=84645 GN=ROHU_013337 PE=3 SV=1	Labeo rohita
A0A498L577	RXN33152.1	Interferon-induced 35 kDa-like protein	C	canonical	1	0	53	0	10								A0A498L577	101	1				tr|A0A498L577|A0A498L577_LABRO Interferon-induced 35 kDa-like protein OS=Labeo rohita OX=84645 GN=ROHU_015751 PE=4 SV=1	Labeo rohita
A0A498L582	RXN03258.1	RNA-binding 42-like isoform X1	C	canonical	0.999	0	17	0	4								A0A498L582	102	1				tr|A0A498L582|A0A498L582_LABRO RNA-binding 42-like isoform X1 OS=Labeo rohita OX=84645 GN=ROHU_013538 PE=4 SV=1	Labeo rohita
A0A498L588		WW domain-containing oxidoreductase isoform X2	C	weak	0.809	0	1	0	1								A0A498L588	103	2				tr|A0A498L588|A0A498L588_LABRO WW domain-containing oxidoreductase isoform X2 OS=Labeo rohita OX=84645 GN=ROHU_013345 PE=4 SV=1	Labeo rohita
A0A498L5A4	RXN03540.1	Peroxisomal coenzyme A diphosphatase NUDT7	C	canonical	0.999	0	16	0	4								A0A498L5A4	104	1				tr|A0A498L5A4|A0A498L5A4_LABRO Peroxisomal coenzyme A diphosphatase NUDT7 OS=Labeo rohita OX=84645 GN=ROHU_011141 PE=4 SV=1	Labeo rohita
A0A498L5C7	RXN03581.1	Roundabout-like protein	C	weak	0.984	0	3	0	1								A0A498L5C7	105	4				tr|A0A498L5C7|A0A498L5C7_LABRO Roundabout-like protein OS=Labeo rohita OX=84645 GN=ROHU_034386 PE=4 SV=1	Labeo rohita
A0A498L5E6	RXN18346.1	Homologous-pairing protein 2-like protein	C	canonical	0.999	0	12	0	6								A0A498L5E6	106	1				tr|A0A498L5E6|A0A498L5E6_LABRO Homologous-pairing protein 2-like protein OS=Labeo rohita OX=84645 GN=ROHU_007773 PE=4 SV=1	Labeo rohita
A0A498L5G8	RXN03348.1	Rapunzel 5	C	canonical	1	0	145	0	18								A0A498L5G8	107	2				tr|A0A498L5G8|A0A498L5G8_LABRO Rapunzel 5 OS=Labeo rohita OX=84645 GN=ROHU_034438 PE=4 SV=1	Labeo rohita
A0A498L5I4	RXN03489.1	Cleavage and polyadenylation specificity factor subunit 4	C	canonical	1	0	36	0	12								A0A498L5I4	108	2				tr|A0A498L5I4|A0A498L5I4_LABRO Cleavage and polyadenylation specificity factor subunit 4 OS=Labeo rohita OX=84645 GN=ROHU_013508 PE=4 SV=1	Labeo rohita
A0A498L5J8		Protein SYS1 homolog	C	weak	0.742	0	1	0	1								A0A498L5J8	109	1				tr|A0A498L5J8|A0A498L5J8_LABRO Protein SYS1 homolog OS=Labeo rohita OX=84645 GN=ROHU_034361 PE=3 SV=1	Labeo rohita
A0A498L5L2	RXN03661.1	Voltage-dependent calcium channel subunit alpha-2 delta-2-like protein	C	weak	0.997	0	2	0	1								A0A498L5L2	110	1				tr|A0A498L5L2|A0A498L5L2_LABRO Voltage-dependent calcium channel subunit alpha-2 delta-2-like protein OS=Labeo rohita OX=84645 GN=ROHU_034371 PE=4 SV=1	Labeo rohita
A0A498L5L4	RXN02713.1	Water dikinase 1-like protein	C	canonical	0.999	0	172	0	14								A0A498L5L4	111	1				tr|A0A498L5L4|A0A498L5L4_LABRO Water dikinase 1-like protein OS=Labeo rohita OX=84645 GN=ROHU_020973 PE=4 SV=1	Labeo rohita
A0A498L5L6	RXN03652.1	U1 small nuclear ribonucleoprotein C (U1 snRNP C) (U1-C) (U1C)	C	canonical	0.997	0	11	0	3								A0A498L5L6	112	1				tr|A0A498L5L6|A0A498L5L6_LABRO U1 small nuclear ribonucleoprotein C OS=Labeo rohita OX=84645 GN=SNRPC PE=3 SV=1	Labeo rohita
A0A498L5M6	RXN02723.1	Dual specificity kinase TTK isoform X1	C	indistinguishable representative	0.999	0	76	0	5								A0A498L5M6	113	2				tr|A0A498L5M6|A0A498L5M6_LABRO Dual specificity kinase TTK isoform X1 OS=Labeo rohita OX=84645 GN=ROHU_034899 PE=4 SV=1	Labeo rohita
A0A498L5N0	RXN03681.1	Nuclear receptor coactivator 5-like isoform X1	C	canonical	0.999	0	26	0	14								A0A498L5N0	114	1				tr|A0A498L5N0|A0A498L5N0_LABRO Nuclear receptor coactivator 5-like isoform X1 OS=Labeo rohita OX=84645 GN=ROHU_028010 PE=4 SV=1	Labeo rohita
A0A498L5N4	RXN03662.1	ABHD14B	C	canonical	1	0	539	0	16								A0A498L5N4	115	1				tr|A0A498L5N4|A0A498L5N4_LABRO ABHD14B OS=Labeo rohita OX=84645 GN=ROHU_034372 PE=4 SV=1	Labeo rohita
A0A498L5N9	RXN03418.1	Polyribonucleotide nucleotidyltransferase mitochondrial	C	canonical	1	0	59	0	23								A0A498L5N9	116	1				tr|A0A498L5N9|A0A498L5N9_LABRO Polyribonucleotide nucleotidyltransferase mitochondrial OS=Labeo rohita OX=84645 GN=ROHU_013437 PE=4 SV=1	Labeo rohita
A0A498L5Q2	RXN03428.1	Retinol-binding 1	C	canonical	0.999	0	34	0	5								A0A498L5Q2	117	1				tr|A0A498L5Q2|A0A498L5Q2_LABRO Retinol-binding 1 OS=Labeo rohita OX=84645 GN=ROHU_013447 PE=3 SV=1	Labeo rohita
A0A498L5Q4	RXN15562.1	Carboxypeptidase (EC 3.4.16.-)	C	canonical	1	0	197	0	14								A0A498L5Q4	118	1				tr|A0A498L5Q4|A0A498L5Q4_LABRO Carboxypeptidase OS=Labeo rohita OX=84645 GN=ROHU_028009 PE=3 SV=1	Labeo rohita
A0A498L5R1	RXN03692.1	Plakophilin-1-like protein	C	canonical	1	0	11	0	8								A0A498L5R1	119	2				tr|A0A498L5R1|A0A498L5R1_LABRO Plakophilin-1-like protein OS=Labeo rohita OX=84645 GN=ROHU_034354 PE=4 SV=1	Labeo rohita
A0A498L5R4	RXN19195.1	Matrix Gla	C	canonical	1	0	6	0	3								A0A498L5R4	120	1				tr|A0A498L5R4|A0A498L5R4_LABRO Matrix Gla OS=Labeo rohita OX=84645 GN=ROHU_013384 PE=4 SV=1	Labeo rohita
A0A498L5S7	RXN03731.1	Sodium channel protein	C	canonical	0.996	0	4	0	2								A0A498L5S7	121	1				tr|A0A498L5S7|A0A498L5S7_LABRO Sodium channel protein OS=Labeo rohita OX=84645 GN=ROHU_013181 PE=3 SV=1	Labeo rohita
A0A498L5U0	RXN03722.1	Ral GTPase-activating protein subunit beta-like isoform X2	C	indistinguishable representative	0.99	0	5	0	4								A0A498L5U0	122	2				tr|A0A498L5U0|A0A498L5U0_LABRO Ral GTPase-activating protein subunit beta-like isoform X2 OS=Labeo rohita OX=84645 GN=ROHU_037417 PE=4 SV=1	Labeo rohita
A0A498L5U1		Cadherin 26	C	indistinguishable representative	0.967	0	3	0	2								A0A498L5U1	123	2				tr|A0A498L5U1|A0A498L5U1_LABRO Cadherin 26 OS=Labeo rohita OX=84645 GN=ROHU_013646 PE=4 SV=1	Labeo rohita
A0A498L5U8		Sodium channel type 8 subunit alpha-like isoform X1	C	weak	0.996	0	1	0	1								A0A498L5U8	124	2				tr|A0A498L5U8|A0A498L5U8_LABRO Sodium channel type 8 subunit alpha-like isoform X1 OS=Labeo rohita OX=84645 GN=ROHU_013201 PE=4 SV=1	Labeo rohita
A0A498L5V1	RXN02793.1	LIM domain only 7-like protein	C	canonical	0.998	0	9	0	5								A0A498L5V1	125	1				tr|A0A498L5V1|A0A498L5V1_LABRO LIM domain only 7-like protein OS=Labeo rohita OX=84645 GN=ROHU_013656 PE=4 SV=1	Labeo rohita
A0A498L5V4	RXN03730.1	Signal transducer and activator of transcription	C	indistinguishable representative	1	0	102	0	23								A0A498L5V4	126	2				tr|A0A498L5V4|A0A498L5V4_LABRO Signal transducer and activator of transcription OS=Labeo rohita OX=84645 GN=ROHU_013180 PE=3 SV=1	Labeo rohita
A0A498L5V8	RXN03761.1	Poly(U)-specific endoribonuclease-A-like isoform X2	C	canonical	1	0	380	0	27								A0A498L5V8	127	1				tr|A0A498L5V8|A0A498L5V8_LABRO Poly(U)-specific endoribonuclease-A-like isoform X2 OS=Labeo rohita OX=84645 GN=ROHU_011728 PE=4 SV=1	Labeo rohita
A0A498L5W0	RXN28291.1	Eukaryotic translation initiation factor 3 subunit A (eIF3a) (Eukaryotic translation initiation factor 3 subunit 10) (eIF-3-theta)	C	canonical	1	0	1428	0	73								A0A498L5W0	128	2				tr|A0A498L5W0|A0A498L5W0_LABRO Eukaryotic translation initiation factor 3 subunit A OS=Labeo rohita OX=84645 GN=EIF3A PE=3 SV=1	Labeo rohita
A0A498L5W1	RXN02803.1	Dehydrogenase reductase SDR family member on chromosome X-like isoform X1	C	canonical	0.999	0	8	0	3								A0A498L5W1	129	1				tr|A0A498L5W1|A0A498L5W1_LABRO Dehydrogenase reductase SDR family member on chromosome X-like isoform X1 OS=Labeo rohita OX=84645 GN=ROHU_013666 PE=4 SV=1	Labeo rohita
A0A498L5W2	RXN16135.1	Serine hydroxymethyltransferase (EC 2.1.2.1)	C	canonical	1	0	1802	0	100								A0A498L5W2	130	3				tr|A0A498L5W2|A0A498L5W2_LABRO Serine hydroxymethyltransferase OS=Labeo rohita OX=84645 GN=ROHU_013507 PE=3 SV=1	Labeo rohita
A0A498LBG3	RXN11205.1	SH3 domain-binding 1-like protein	C	canonical	1	0	62	0	7								A0A498L5W2	130	3				tr|A0A498LBG3|A0A498LBG3_LABRO SH3 domain-binding 1-like protein OS=Labeo rohita OX=84645 GN=ROHU_030151 PE=4 SV=1	Labeo rohita
A0A498N951	RXN29540.1	Serine mitochondrial	C	canonical	1	0	723	0	46								A0A498L5W2	130	3				tr|A0A498N951|A0A498N951_LABRO Serine mitochondrial OS=Labeo rohita OX=84645 GN=ROHU_036275 PE=4 SV=1	Labeo rohita
A0A498L5W4	RXN03619.1	Ephexin-1	C	indistinguishable representative	0.999	0	24	0	11								A0A498L5W4	131	2				tr|A0A498L5W4|A0A498L5W4_LABRO Ephexin-1 OS=Labeo rohita OX=84645 GN=ROHU_013323 PE=4 SV=1	Labeo rohita
A0A498L5X9		Sulfatase-modifying factor 1	C	weak	0.856	0	1	0	1								A0A498L5X9	132	1				tr|A0A498L5X9|A0A498L5X9_LABRO Sulfatase-modifying factor 1 OS=Labeo rohita OX=84645 GN=ROHU_011729 PE=4 SV=1	Labeo rohita
A0A498L5Y4	RXN08041.1	Elongation factor Ts, mitochondrial (EF-Ts) (EF-TsMt)	C	canonical	1	0	158	0	15								A0A498L5Y4	133	1				tr|A0A498L5Y4|A0A498L5Y4_LABRO Elongation factor Ts, mitochondrial OS=Labeo rohita OX=84645 GN=TSFM PE=3 SV=1	Labeo rohita
A0A498L5Y7	RXN03791.1	Putative tRNA pseudouridine synthase 2	C	canonical	0.996	0	3	0	3								A0A498L5Y7	134	1				tr|A0A498L5Y7|A0A498L5Y7_LABRO Putative tRNA pseudouridine synthase 2 OS=Labeo rohita OX=84645 GN=ROHU_013241 PE=4 SV=1	Labeo rohita
A0A498L5Z4	RXN08051.1	Cereblon isoform X2	C	canonical	0.999	0	9	0	4								A0A498L5Z4	135	1				tr|A0A498L5Z4|A0A498L5Z4_LABRO Cereblon isoform X2 OS=Labeo rohita OX=84645 GN=ROHU_011737 PE=4 SV=1	Labeo rohita
A0A498L5Z7	RXN03772.1	DDI1-like protein	C	canonical	1	0	209	0	20								A0A498L5Z7	136	1				tr|A0A498L5Z7|A0A498L5Z7_LABRO DDI1-like protein OS=Labeo rohita OX=84645 GN=ROHU_011739 PE=4 SV=1	Labeo rohita
A0A498L602	RXN02843.1	GDP-Man:Man(3) c(2)-PP-Dol alpha-1,2-mannosyltransferase	C	canonical	0.999	0	68	0	9								A0A498L602	137	1				tr|A0A498L602|A0A498L602_LABRO GDP-Man:Man(3) c(2)-PP-Dol alpha-1,2-mannosyltransferase OS=Labeo rohita OX=84645 GN=ROHU_013706 PE=4 SV=1	Labeo rohita
A0A498L605	RXN03811.1	Transport Sec61 subunit alpha-like 1	C	representative	1	0	458	0	28								A0A498L605	138	2				tr|A0A498L605|A0A498L605_LABRO Transport Sec61 subunit alpha-like 1 OS=Labeo rohita OX=84645 GN=ROHU_013261 PE=3 SV=1	Labeo rohita
A0A498LRE8	RXN08047.1	Transport Sec61 subunit alpha-like 1	C	marginally distinguished	1	0	465	0	28								A0A498L605	138	2				tr|A0A498LRE8|A0A498LRE8_LABRO Transport Sec61 subunit alpha-like 1 OS=Labeo rohita OX=84645 GN=ROHU_011733 PE=3 SV=1	Labeo rohita
A0A498L607		Hyaluronidase (EC 3.2.1.35) (Hyaluronoglucosaminidase)	C	weak	0.871	0	1	0	1								A0A498L607	139	2				tr|A0A498L607|A0A498L607_LABRO Hyaluronidase OS=Labeo rohita OX=84645 GN=ROHU_034369 PE=3 SV=1	Labeo rohita
A0A498L616	RXN03821.1	Glycerate kinase isoform X1	C	canonical	0.999	0	60	0	12								A0A498L616	140	1				tr|A0A498L616|A0A498L616_LABRO Glycerate kinase isoform X1 OS=Labeo rohita OX=84645 GN=ROHU_013271 PE=4 SV=1	Labeo rohita
A0A498L617	RXN03792.1	Ectonucleoside triphosphate diphosphohydrolase 8-like protein	C	canonical	0.999	0	40	0	10								A0A498L617	141	1				tr|A0A498L617|A0A498L617_LABRO Ectonucleoside triphosphate diphosphohydrolase 8-like protein OS=Labeo rohita OX=84645 GN=ROHU_013242 PE=3 SV=1	Labeo rohita
A0A498L623	RXN02863.1	E3 ubiquitin-ligase TRIM32	C	indistinguishable representative	1	0	954	0	23								A0A498L623	142	2				tr|A0A498L623|A0A498L623_LABRO E3 ubiquitin-ligase TRIM32 OS=Labeo rohita OX=84645 GN=ROHU_013726 PE=4 SV=1	Labeo rohita
A0A498L630	RXN03810.1	ER membrane protein complex subunit 3	C	canonical	0.999	0	34	0	6								A0A498L630	143	1				tr|A0A498L630|A0A498L630_LABRO ER membrane protein complex subunit 3 OS=Labeo rohita OX=84645 GN=ROHU_013260 PE=3 SV=1	Labeo rohita
A0A498L642	RXN14121.1	Nucleosome assembly 1-like 4 isoform X1	C	canonical	1	0	436	0	28								A0A498L642	144	6				tr|A0A498L642|A0A498L642_LABRO Nucleosome assembly 1-like 4 isoform X1 OS=Labeo rohita OX=84645 GN=ROHU_009206 PE=3 SV=1	Labeo rohita
A0A498MN63	RXN22929.1	Oxysterol-binding protein	C	representative	0.999	0	25	0	4								A0A498L642	144	6				tr|A0A498MN63|A0A498MN63_LABRO Oxysterol-binding protein OS=Labeo rohita OX=84645 GN=ROHU_023218 PE=3 SV=1	Labeo rohita
A0A498MRA3	RXN22930.1	Nucleosome assembly 1-like 1 isoform X2	C	marginally distinguished	1	0	844	0	38								A0A498L642	144	6				tr|A0A498MRA3|A0A498MRA3_LABRO Nucleosome assembly 1-like 1 isoform X2 OS=Labeo rohita OX=84645 GN=ROHU_023219 PE=3 SV=1	Labeo rohita
A0A498NZ62	RXN37191.1	Nucleosome assembly 1-like 1 isoform X2	C	representative	1	0	843	0	37								A0A498L642	144	6				tr|A0A498NZ62|A0A498NZ62_LABRO Nucleosome assembly 1-like 1 isoform X2 OS=Labeo rohita OX=84645 GN=ROHU_002251 PE=3 SV=1	Labeo rohita
A0A498L647	RXN03851.1	Testis-expressed sequence 264 protein-like	C	canonical	0.986	0	4	0	2								A0A498L647	145	1				tr|A0A498L647|A0A498L647_LABRO Testis-expressed sequence 264 protein-like OS=Labeo rohita OX=84645 GN=ROHU_035767 PE=4 SV=1	Labeo rohita
A0A498L660	RXN08071.1	La-related 4-like isoform X2	C	canonical	0.999	0	8	0	5								A0A498L660	146	1				tr|A0A498L660|A0A498L660_LABRO La-related 4-like isoform X2 OS=Labeo rohita OX=84645 GN=ROHU_035400 PE=4 SV=1	Labeo rohita
A0A498L697	RXN03769.1	Sorting nexin-5-like protein	C	indistinguishable representative	0.998	0	4	0	3								A0A498L697	147	2				tr|A0A498L697|A0A498L697_LABRO Sorting nexin-5-like protein OS=Labeo rohita OX=84645 GN=ROHU_013219 PE=4 SV=1	Labeo rohita
A0A498L6A6		Coiled-coil domain-containing 36-like protein	C	insufficient evidence	0.749	0	1	0	1								A0A498L6A6	148	1				tr|A0A498L6A6|A0A498L6A6_LABRO Coiled-coil domain-containing 36-like protein OS=Labeo rohita OX=84645 GN=ROHU_013229 PE=4 SV=1	Labeo rohita
A0A498L6A7	RXN03890.1	Glyoxalase domain-containing 4	C	canonical	1	0	403	0	35								A0A498L6A7	149	1				tr|A0A498L6A7|A0A498L6A7_LABRO Glyoxalase domain-containing 4 OS=Labeo rohita OX=84645 GN=ROHU_034214 PE=4 SV=1	Labeo rohita
A0A498L6B4	RXN03789.1	Eukaryotic translation initiation factor 4E transporter isoform X1	C	canonical	1	0	2852	0	241								A0A498L6B4	150	1				tr|A0A498L6B4|A0A498L6B4_LABRO Eukaryotic translation initiation factor 4E transporter isoform X1 OS=Labeo rohita OX=84645 GN=ROHU_013239 PE=4 SV=1	Labeo rohita
A0A498L6C1	RXN03799.1	Calcium-dependent secretion activator 1-like protein	C	canonical	1	0	343	0	31								A0A498L6C1	151	6				tr|A0A498L6C1|A0A498L6C1_LABRO Calcium-dependent secretion activator 1-like protein OS=Labeo rohita OX=84645 GN=ROHU_013249 PE=4 SV=1	Labeo rohita
A0A498L6R9	RXN03798.1	Calcium-dependent secretion activator 1-like protein	C	canonical	0.999	0	280	0	36								A0A498L6C1	151	6				tr|A0A498L6R9|A0A498L6R9_LABRO Calcium-dependent secretion activator 1-like protein OS=Labeo rohita OX=84645 GN=ROHU_013248 PE=4 SV=1	Labeo rohita
A0A498LRQ3	RXN11128.1	Calcium-dependent secretion activator 1 isoform X8	C	canonical	0.999	0	317	0	32								A0A498L6C1	151	6				tr|A0A498LRQ3|A0A498LRQ3_LABRO Calcium-dependent secretion activator 1 isoform X8 OS=Labeo rohita OX=84645 GN=ROHU_030228 PE=4 SV=1	Labeo rohita
A0A498L6D0	RXN03809.1	Ubiquitin carboxyl-terminal hydrolase (EC 3.4.19.12)	C	canonical	0.999	0	20	0	10								A0A498L6D0	152	1				tr|A0A498L6D0|A0A498L6D0_LABRO Ubiquitin carboxyl-terminal hydrolase OS=Labeo rohita OX=84645 GN=ROHU_013259 PE=3 SV=1	Labeo rohita
A0A498L6D3	RXN02386.1	ATP-sensitive inward rectifier potassium channel 10-like protein	C	canonical	0.999	0	58	0	10								A0A498L6D3	153	1				tr|A0A498L6D3|A0A498L6D3_LABRO ATP-sensitive inward rectifier potassium channel 10-like protein OS=Labeo rohita OX=84645 GN=ROHU_035036 PE=3 SV=1	Labeo rohita
A0A498L6D4	RXN19602.1	Hepatocyte growth factor-regulated tyrosine kinase substrate isoform X1	C	canonical	0.999	0	80	0	14								A0A498L6D4	154	1				tr|A0A498L6D4|A0A498L6D4_LABRO Hepatocyte growth factor-regulated tyrosine kinase substrate isoform X1 OS=Labeo rohita OX=84645 GN=ROHU_025658 PE=4 SV=1	Labeo rohita
A0A498L6D9	RXN03819.1	ADP-ribosylation factor 8B	C	canonical	1	0	256	0	14								A0A498L6D9	155	3				tr|A0A498L6D9|A0A498L6D9_LABRO ADP-ribosylation factor 8B OS=Labeo rohita OX=84645 GN=ROHU_013269 PE=3 SV=1	Labeo rohita
A0A498LJJ3	RXN05645.1	ADP-ribosylation factor 8A	C	canonical	1	0	178	0	10								A0A498L6D9	155	3				tr|A0A498LJJ3|A0A498LJJ3_LABRO ADP-ribosylation factor 8A OS=Labeo rohita OX=84645 GN=ROHU_012642 PE=3 SV=1	Labeo rohita
A0A498NS08	RXN34324.1	ADP-ribosylation factor 8B	C	marginally distinguished	1	0	161	0	10								A0A498L6D9	155	3				tr|A0A498NS08|A0A498NS08_LABRO ADP-ribosylation factor 8B OS=Labeo rohita OX=84645 GN=ROHU_015047 PE=3 SV=1	Labeo rohita
A0A498L6E0	RXN03658.1	Diphosphoinositol polyphosphate phosphohydrolase 1	C	canonical	0.999	0	9	0	4								A0A498L6E0	156	3				tr|A0A498L6E0|A0A498L6E0_LABRO Diphosphoinositol polyphosphate phosphohydrolase 1 OS=Labeo rohita OX=84645 GN=ROHU_034368 PE=4 SV=1	Labeo rohita
A0A498L6E2	RXN03951.1	Tubulin-specific chaperone D	C	indistinguishable representative	0.999	0	214	0	23								A0A498L6E2	157	2				tr|A0A498L6E2|A0A498L6E2_LABRO Tubulin-specific chaperone D OS=Labeo rohita OX=84645 GN=ROHU_034275 PE=4 SV=1	Labeo rohita
A0A498L6E4	RXN03930.1	Histone chaperone asf1b-B	C	representative	1	0	36	0	8								A0A498L6E4	158	3				tr|A0A498L6E4|A0A498L6E4_LABRO Histone chaperone asf1b-B OS=Labeo rohita OX=84645 GN=ROHU_034254 PE=4 SV=1	Labeo rohita
A0A498NVE4		Histone chaperone asf1b-B	C	canonical	0.999	0	8	0	3								A0A498L6E4	158	3				tr|A0A498NVE4|A0A498NVE4_LABRO Histone chaperone asf1b-B OS=Labeo rohita OX=84645 GN=ROHU_014155 PE=4 SV=1	Labeo rohita
A0A498L6E5	RXN03003.1	TBC1 domain family member 22A isoform X1	C	canonical	1	0	518	0	39								A0A498L6E5	159	2				tr|A0A498L6E5|A0A498L6E5_LABRO TBC1 domain family member 22A isoform X1 OS=Labeo rohita OX=84645 GN=ROHU_034589 PE=3 SV=1	Labeo rohita
A0A498L6F1	RXN03852.1	Fanconi anemia group D2	C	weak	0.996	0	1	0	1								A0A498L6F1	160	1				tr|A0A498L6F1|A0A498L6F1_LABRO Fanconi anemia group D2 OS=Labeo rohita OX=84645 GN=ROHU_035768 PE=4 SV=1	Labeo rohita
A0A498L6F7	RXN03839.1	Disco-interacting 2-like protein	C	canonical	0.999	0	52	0	20								A0A498L6F7	161	8				tr|A0A498L6F7|A0A498L6F7_LABRO Disco-interacting 2-like protein OS=Labeo rohita OX=84645 GN=ROHU_035755 PE=4 SV=1	Labeo rohita
A0A498LEH1	RXN03755.1	Disco-interacting 2-like protein	C	canonical	0.999	0	42	0	18								A0A498L6F7	161	8				tr|A0A498LEH1|A0A498LEH1_LABRO Disco-interacting 2-like protein OS=Labeo rohita OX=84645 GN=ROHU_011722 PE=4 SV=1	Labeo rohita
A0A498LHS4	RXN07093.1	Disco-interacting 2-like protein	C	canonical	0.999	0	42	0	13								A0A498L6F7	161	8				tr|A0A498LHS4|A0A498LHS4_LABRO Disco-interacting 2-like protein OS=Labeo rohita OX=84645 GN=ROHU_032483 PE=4 SV=1	Labeo rohita
A0A498NNL2	RXN33358.1	Disco-interacting 2-like protein	C	canonical	0.999	0	19	0	9								A0A498L6F7	161	8				tr|A0A498NNL2|A0A498NNL2_LABRO Disco-interacting 2-like protein OS=Labeo rohita OX=84645 GN=ROHU_004312 PE=4 SV=1	Labeo rohita
A0A498NP89	RXN33357.1	Disco-interacting 2-like protein	C	canonical	0.999	0	11	0	7								A0A498L6F7	161	8				tr|A0A498NP89|A0A498NP89_LABRO Disco-interacting 2-like protein OS=Labeo rohita OX=84645 GN=ROHU_004311 PE=4 SV=1	Labeo rohita
A0A498NTF3	RXN34777.1	Disco-interacting 2-like protein	C	indistinguishable representative	0.999	0	22	0	7								A0A498L6F7	161	8				tr|A0A498NTF3|A0A498NTF3_LABRO Disco-interacting 2-like protein OS=Labeo rohita OX=84645 GN=ROHU_014698 PE=4 SV=1	Labeo rohita
A0A498L6G5		Nuclear factor of activated T-cytoplasmic 2-like protein	C	weak	0.921	0	1	0	1								A0A498L6G5	162	2				tr|A0A498L6G5|A0A498L6G5_LABRO Nuclear factor of activated T-cytoplasmic 2-like protein OS=Labeo rohita OX=84645 GN=ROHU_034350 PE=4 SV=1	Labeo rohita
A0A498L2R1	RXN02712.1	SLIT-ROBO Rho GTPase-activating 3-like isoform X1	C	canonical	1	0	127	0	25								A0A498L6G6	163	13				tr|A0A498L2R1|A0A498L2R1_LABRO SLIT-ROBO Rho GTPase-activating 3-like isoform X1 OS=Labeo rohita OX=84645 GN=ROHU_034888 PE=4 SV=1	Labeo rohita
A0A498L2T0	RXN02711.1	U8 snoRNA-decapping enzyme-like protein	C	representative	1	0	161	0	17								A0A498L6G6	163	13				tr|A0A498L2T0|A0A498L2T0_LABRO U8 snoRNA-decapping enzyme-like protein OS=Labeo rohita OX=84645 GN=ROHU_034887 PE=4 SV=1	Labeo rohita
A0A498L6G6	RXN03849.1	SLIT-ROBO Rho GTPase-activating 3 isoform X1	C	canonical	1	0	122	0	37								A0A498L6G6	163	13				tr|A0A498L6G6|A0A498L6G6_LABRO SLIT-ROBO Rho GTPase-activating 3 isoform X1 OS=Labeo rohita OX=84645 GN=ROHU_035765 PE=4 SV=1	Labeo rohita
A0A498LLS7	RXN22396.1	SLIT-ROBO Rho GTPase-activating 2 isoform X1	C	canonical	0.999	0	14	0	4								A0A498L6G6	163	13				tr|A0A498LLS7|A0A498LLS7_LABRO SLIT-ROBO Rho GTPase-activating 2 isoform X1 OS=Labeo rohita OX=84645 GN=ROHU_023471 PE=4 SV=1	Labeo rohita
A0A498LMY1		Serine threonine-kinase TBK1	C	indistinguishable representative	0.999	0	22	0	10								A0A498L6G6	163	13				tr|A0A498LMY1|A0A498LMY1_LABRO Serine threonine-kinase TBK1 OS=Labeo rohita OX=84645 GN=ROHU_031947 PE=4 SV=1	Labeo rohita
A0A498MLU9	RXN22399.1	SLIT-ROBO Rho GTPase-activating 2 isoform X1	C	canonical	0.999	0	26	0	8								A0A498L6G6	163	13				tr|A0A498MLU9|A0A498MLU9_LABRO SLIT-ROBO Rho GTPase-activating 2 isoform X1 OS=Labeo rohita OX=84645 GN=ROHU_023474 PE=4 SV=1	Labeo rohita
A0A498MPU0	RXN23538.1	U8 snoRNA-decapping enzyme-like protein	C	marginally distinguished	1	0	129	0	12								A0A498L6G6	163	13				tr|A0A498MPU0|A0A498MPU0_LABRO U8 snoRNA-decapping enzyme-like protein OS=Labeo rohita OX=84645 GN=ROHU_022944 PE=4 SV=1	Labeo rohita
A0A498MVH4	RXN24730.1	SLIT-ROBO Rho GTPase-activating 1-like isoform X1	C	canonical	0.999	0	33	0	14								A0A498L6G6	163	13				tr|A0A498MVH4|A0A498MVH4_LABRO SLIT-ROBO Rho GTPase-activating 1-like isoform X1 OS=Labeo rohita OX=84645 GN=ROHU_022035 PE=4 SV=1	Labeo rohita
A0A498N466	RXN23537.1	SLIT-ROBO Rho GTPase-activating 3-like isoform X1	C	canonical	1	0	156	0	30								A0A498L6G6	163	13				tr|A0A498N466|A0A498N466_LABRO SLIT-ROBO Rho GTPase-activating 3-like isoform X1 OS=Labeo rohita OX=84645 GN=ROHU_022943 PE=4 SV=1	Labeo rohita
A0A498N5D6	RXN26894.1	Polynucleotide 5-hydroxyl-kinase NOL9-like protein	C	canonical	0.996	0	17	0	8								A0A498L6G6	163	13				tr|A0A498N5D6|A0A498N5D6_LABRO Polynucleotide 5-hydroxyl-kinase NOL9-like protein OS=Labeo rohita OX=84645 GN=ROHU_020347 PE=3 SV=1	Labeo rohita
A0A498L6I5		Uncharacterized protein	C	indistinguishable representative	1	0	76	0	7								A0A498L6I5	164	2				tr|A0A498L6I5|A0A498L6I5_LABRO Uncharacterized protein OS=Labeo rohita OX=84645 GN=ROHU_013294 PE=4 SV=1	Labeo rohita
A0A498L6J8	RXN03879.1	Alpha-mannosidase 2C1	C	representative	0.999	0	69	0	22								A0A498L6J8	165	3				tr|A0A498L6J8|A0A498L6J8_LABRO Alpha-mannosidase 2C1 OS=Labeo rohita OX=84645 GN=ROHU_013174 PE=4 SV=1	Labeo rohita
A0A498L6K7		A disintegrin and metallo ase with thrombospondin motifs 15-like protein	C	weak	0.975	0	1	0	1								A0A498L6K7	166	2				tr|A0A498L6K7|A0A498L6K7_LABRO A disintegrin and metallo ase with thrombospondin motifs 15-like protein OS=Labeo rohita OX=84645 GN=ROHU_034192 PE=4 SV=1	Labeo rohita
A0A498L6L1	RXN03073.1	40S ribosomal protein S12	C	canonical	1	0	1099	0	29								A0A498L6L1	167	1				tr|A0A498L6L1|A0A498L6L1_LABRO 40S ribosomal protein S12 OS=Labeo rohita OX=84645 GN=ROHU_034659 PE=3 SV=1	Labeo rohita
A0A498L696	RXN03901.1	Dehydrogenase reductase SDR family member 11-like protein	C	canonical	0.999	0	120	0	14								A0A498L6M0	168	9				tr|A0A498L696|A0A498L696_LABRO Dehydrogenase reductase SDR family member 11-like protein OS=Labeo rohita OX=84645 GN=ROHU_034225 PE=3 SV=1	Labeo rohita
A0A498L6B6	RXN03900.1	Dehydrogenase reductase SDR family member 11-like protein	C	canonical	1	0	332	0	23								A0A498L6M0	168	9				tr|A0A498L6B6|A0A498L6B6_LABRO Dehydrogenase reductase SDR family member 11-like protein OS=Labeo rohita OX=84645 GN=ROHU_034224 PE=3 SV=1	Labeo rohita
A0A498L6M0	RXN03899.1	Dehydrogenase reductase SDR family member 11-like protein	C	canonical	1	0	620	0	25								A0A498L6M0	168	9				tr|A0A498L6M0|A0A498L6M0_LABRO Dehydrogenase reductase SDR family member 11-like protein OS=Labeo rohita OX=84645 GN=ROHU_034223 PE=3 SV=1	Labeo rohita
A0A498LRX7	RXN10861.1	Dehydrogenase reductase SDR family member 11-like protein	C	canonical	1	0	112	0	6								A0A498L6M0	168	9				tr|A0A498LRX7|A0A498LRX7_LABRO Dehydrogenase reductase SDR family member 11-like protein OS=Labeo rohita OX=84645 GN=ROHU_010795 PE=3 SV=1	Labeo rohita
A0A498LZV5	RXN32429.1	Dehydrogenase reductase SDR family member 11	C	canonical	1	0	56	0	10								A0A498L6M0	168	9				tr|A0A498LZV5|A0A498LZV5_LABRO Dehydrogenase reductase SDR family member 11 OS=Labeo rohita OX=84645 GN=ROHU_004631 PE=3 SV=1	Labeo rohita
A0A498MNC5		Carbonic anhydrase 4-like protein	C	representative	1	0	216	0	22								A0A498L6M0	168	9				tr|A0A498MNC5|A0A498MNC5_LABRO Carbonic anhydrase 4-like protein OS=Labeo rohita OX=84645 GN=ROHU_007716 PE=3 SV=1	Labeo rohita
A0A498N791	RXN28691.1	Carbonic anhydrase 4-like protein	C	canonical	1	0	134	0	14								A0A498L6M0	168	9				tr|A0A498N791|A0A498N791_LABRO Carbonic anhydrase 4-like protein OS=Labeo rohita OX=84645 GN=ROHU_000918 PE=3 SV=1	Labeo rohita
A0A498L6M4	RXN19604.1	39S ribosomal mitochondrial-like protein	C	canonical	1	0	24	0	6								A0A498L6M4	169	1				tr|A0A498L6M4|A0A498L6M4_LABRO 39S ribosomal mitochondrial-like protein OS=Labeo rohita OX=84645 GN=ROHU_025660 PE=3 SV=1	Labeo rohita
A0A498L6N9	RXN03919.1	Claudin	C	indistinguishable representative	1	0	194	0	9								A0A498L6N9	170	2				tr|A0A498L6N9|A0A498L6N9_LABRO Claudin OS=Labeo rohita OX=84645 GN=ROHU_034243 PE=3 SV=1	Labeo rohita
A0A498L6P4	RXN02496.1	COUP transcription factor 1 isoform X2	C	weak	0.988	0	1	0	1								A0A498L6P4	171	1				tr|A0A498L6P4|A0A498L6P4_LABRO COUP transcription factor 1 isoform X2 OS=Labeo rohita OX=84645 GN=ROHU_013754 PE=3 SV=1	Labeo rohita
A0A498L6P5		Phospholipid phosphatase 3-like protein	C	indistinguishable representative	0.998	0	16	0	2								A0A498L6P5	172	2				tr|A0A498L6P5|A0A498L6P5_LABRO Phospholipid phosphatase 3-like protein OS=Labeo rohita OX=84645 GN=ROHU_034266 PE=4 SV=1	Labeo rohita
A0A498L6P8	RXN04051.1	C2 domain-containing At1g53590-like protein	C	canonical	0.999	0	95	0	8								A0A498L6P8	173	3				tr|A0A498L6P8|A0A498L6P8_LABRO C2 domain-containing At1g53590-like protein OS=Labeo rohita OX=84645 GN=ROHU_013133 PE=4 SV=1	Labeo rohita
A0A498L6Q9	RXN03788.1	RuvB-like helicase (EC 3.6.4.12)	C	canonical	1	0	601	0	30								A0A498L6Q9	174	1				tr|A0A498L6Q9|A0A498L6Q9_LABRO RuvB-like helicase OS=Labeo rohita OX=84645 GN=ROHU_013238 PE=3 SV=1	Labeo rohita
A0A498L6R5		HLA class II histocompatibility DP alpha 1 chain-like protein	C	weak	0.995	0	1	0	1								A0A498L6R5	175	4				tr|A0A498L6R5|A0A498L6R5_LABRO HLA class II histocompatibility DP alpha 1 chain-like protein OS=Labeo rohita OX=84645 GN=ROHU_034286 PE=4 SV=1	Labeo rohita
A0A498L6S2	RXN03949.1	Tubulin-specific chaperone D	C	representative	0.999	0	19	0	5								A0A498L6S2	176	3				tr|A0A498L6S2|A0A498L6S2_LABRO Tubulin-specific chaperone D OS=Labeo rohita OX=84645 GN=ROHU_034273 PE=4 SV=1	Labeo rohita
A0A498MLE7	RXN22199.1	Arginine N-methyltransferase 6	C	marginally distinguished	0.996	0	5	0	3								A0A498L6S2	176	3				tr|A0A498MLE7|A0A498MLE7_LABRO Arginine N-methyltransferase 6 OS=Labeo rohita OX=84645 GN=ROHU_006861 PE=3 SV=1	Labeo rohita
A0A498L6T1	RXN30970.1	Calsequestrin	C	canonical	1	0	1451	0	55								A0A498L6T1	177	1				tr|A0A498L6T1|A0A498L6T1_LABRO Calsequestrin OS=Labeo rohita OX=84645 GN=ROHU_017374 PE=3 SV=1	Labeo rohita
A0A498L6U4	RXN04101.1	Phosphatidylinositol 5-phosphate 4-kinase type-2 alpha	C	canonical	1	0	486	0	34								A0A498L6U4	178	3				tr|A0A498L6U4|A0A498L6U4_LABRO Phosphatidylinositol 5-phosphate 4-kinase type-2 alpha OS=Labeo rohita OX=84645 GN=ROHU_013096 PE=4 SV=1	Labeo rohita
A0A498LNL7	RXN10038.1	Phosphatidylinositol 5-phosphate 4-kinase type-2 gamma	C	canonical	0.999	0	96	0	16								A0A498L6U4	178	3				tr|A0A498LNL7|A0A498LNL7_LABRO Phosphatidylinositol 5-phosphate 4-kinase type-2 gamma OS=Labeo rohita OX=84645 GN=ROHU_031131 PE=3 SV=1	Labeo rohita
A0A498L6U5	RXN03828.1	2,4-dienoyl-mitochondrial-like isoform X2	C	canonical	0.999	0	314	0	37								A0A498L6U5	179	1				tr|A0A498L6U5|A0A498L6U5_LABRO 2,4-dienoyl-mitochondrial-like isoform X2 OS=Labeo rohita OX=84645 GN=ROHU_013278 PE=4 SV=1	Labeo rohita
A0A498L6V6	RXN04111.1	Conserved oligomeric Golgi complex subunit 6 (COG complex subunit 6) (Component of oligomeric Golgi complex 6)	C	weak	0.99	0	2	0	1								A0A498L6V6	180	2				tr|A0A498L6V6|A0A498L6V6_LABRO Conserved oligomeric Golgi complex subunit 6 OS=Labeo rohita OX=84645 GN=ROHU_034112 PE=3 SV=1	Labeo rohita
A0A498L6W1	RXN04090.1	Hydroxylysine kinase	C	canonical	0.999	0	33	0	7								A0A498L6W1	181	1				tr|A0A498L6W1|A0A498L6W1_LABRO Hydroxylysine kinase OS=Labeo rohita OX=84645 GN=ROHU_013106 PE=4 SV=1	Labeo rohita
A0A498L6W7	RXN04121.1	Annexin	C	canonical	1	0	701	0	54								A0A498L6W7	182	1				tr|A0A498L6W7|A0A498L6W7_LABRO Annexin OS=Labeo rohita OX=84645 GN=ROHU_034122 PE=3 SV=1	Labeo rohita
A0A498L6X2	RXN04100.1	Armadillo repeat-containing 3	C	canonical	0.999	0	31	0	6								A0A498L6X2	183	1				tr|A0A498L6X2|A0A498L6X2_LABRO Armadillo repeat-containing 3 OS=Labeo rohita OX=84645 GN=ROHU_013095 PE=4 SV=1	Labeo rohita
A0A498L6X4	RXN02566.1	Cytolysin Src-1-like protein	C	indistinguishable representative	1	0	211	0	20								A0A498L6X4	184	2				tr|A0A498L6X4|A0A498L6X4_LABRO Cytolysin Src-1-like protein OS=Labeo rohita OX=84645 GN=ROHU_034916 PE=4 SV=1	Labeo rohita
A0A498L6X6	RXN04131.1	Transmembrane emp24 domain-containing 3-like protein	C	canonical	0.999	0	60	0	9								A0A498L6X6	185	1				tr|A0A498L6X6|A0A498L6X6_LABRO Transmembrane emp24 domain-containing 3-like protein OS=Labeo rohita OX=84645 GN=ROHU_034132 PE=3 SV=1	Labeo rohita
A0A498L6Z5	RXN04151.1	Methylmalonyl-mitochondrial-like isoform X1	C	canonical	1	0	83	0	6								A0A498L6Z5	186	1				tr|A0A498L6Z5|A0A498L6Z5_LABRO Methylmalonyl-mitochondrial-like isoform X1 OS=Labeo rohita OX=84645 GN=ROHU_034152 PE=4 SV=1	Labeo rohita
A0A498L6Z6	RXN03878.1	Endonuclease 8-like 1	C	representative	1	0	72	0	20								A0A498L6Z6	187	4				tr|A0A498L6Z6|A0A498L6Z6_LABRO Endonuclease 8-like 1 OS=Labeo rohita OX=84645 GN=ROHU_013173 PE=4 SV=1	Labeo rohita
A0A498L707	RXN02596.1	60S ribosomal protein L27	C	canonical	1	0	719	0	21								A0A498L707	188	1				tr|A0A498L707|A0A498L707_LABRO 60S ribosomal protein L27 OS=Labeo rohita OX=84645 GN=ROHU_015748 PE=3 SV=1	Labeo rohita
A0A498L710	RXN03888.1	Nucleoredoxin	C	canonical	0.999	0	31	0	5								A0A498L710	189	1				tr|A0A498L710|A0A498L710_LABRO Nucleoredoxin OS=Labeo rohita OX=84645 GN=ROHU_034212 PE=4 SV=1	Labeo rohita
A0A498L725		Ankyrin repeat and fibronectin type-III domain-containing 1-like protein	C	weak	0.944	0	1	0	1								A0A498L725	190	1				tr|A0A498L725|A0A498L725_LABRO Ankyrin repeat and fibronectin type-III domain-containing 1-like protein OS=Labeo rohita OX=84645 GN=ROHU_013835 PE=4 SV=1	Labeo rohita
A0A498L565	RXN02583.1	Myosin-binding fast-type isoform X1	C	marginally distinguished	1	0	1620	0	81								A0A498L733	191	6				tr|A0A498L565|A0A498L565_LABRO Myosin-binding fast-type isoform X1 OS=Labeo rohita OX=84645 GN=ROHU_034933 PE=4 SV=1	Labeo rohita
A0A498L733	RXN02244.1	Myosin-binding fast-type-like isoform X2	C	canonical	1	0	3313	0	131								A0A498L733	191	6				tr|A0A498L733|A0A498L733_LABRO Myosin-binding fast-type-like isoform X2 OS=Labeo rohita OX=84645 GN=ROHU_013845 PE=4 SV=1	Labeo rohita
A0A498M5B5	RXN08306.1	Myosin-binding cardiac-type-like protein	C	canonical	1	0	508	0	43								A0A498L733	191	6				tr|A0A498M5B5|A0A498M5B5_LABRO Myosin-binding cardiac-type-like protein OS=Labeo rohita OX=84645 GN=ROHU_011548 PE=4 SV=1	Labeo rohita
A0A498M8F9	RXN08341.1	Myosin-binding cardiac-type isoform X1	C	canonical	1	0	1093	0	80								A0A498L733	191	6				tr|A0A498M8F9|A0A498M8F9_LABRO Myosin-binding cardiac-type isoform X1 OS=Labeo rohita OX=84645 GN=ROHU_035367 PE=4 SV=1	Labeo rohita
A0A498NHS2		HSPB1-associated 1-like protein	C	marginally distinguished	0.982	0	2	0	2								A0A498L733	191	6				tr|A0A498NHS2|A0A498NHS2_LABRO HSPB1-associated 1-like protein OS=Labeo rohita OX=84645 GN=ROHU_007189 PE=4 SV=1	Labeo rohita
A0A498NMI2	RXN33163.1	Myosin-binding fast-type isoform X1	C	marginally distinguished	1	0	1590	0	81								A0A498L733	191	6				tr|A0A498NMI2|A0A498NMI2_LABRO Myosin-binding fast-type isoform X1 OS=Labeo rohita OX=84645 GN=ROHU_015762 PE=4 SV=1	Labeo rohita
A0A498L735	RXN02626.1	Alpha-N-acetylglucosaminidase	C	canonical	1	0	14	0	8								A0A498L735	192	1				tr|A0A498L735|A0A498L735_LABRO Alpha-N-acetylglucosaminidase OS=Labeo rohita OX=84645 GN=ROHU_022071 PE=4 SV=1	Labeo rohita
A0A498L741	RXN03918.1	GTPase IMAP family member 7-like protein	C	canonical	0.994	0	4	0	3								A0A498L741	193	1				tr|A0A498L741|A0A498L741_LABRO GTPase IMAP family member 7-like protein OS=Labeo rohita OX=84645 GN=ROHU_025656 PE=4 SV=1	Labeo rohita
A0A498L760		DDB1-and CUL4-associated factor 13	C	canonical	0.994	0	3	0	3								A0A498L760	194	1				tr|A0A498L760|A0A498L760_LABRO DDB1-and CUL4-associated factor 13 OS=Labeo rohita OX=84645 GN=ROHU_013543 PE=4 SV=1	Labeo rohita
A0A498L766	RXN04109.1	Thiamine pyrophosphokinase 1	C	canonical	1	0	117	0	8								A0A498L766	195	1				tr|A0A498L766|A0A498L766_LABRO Thiamine pyrophosphokinase 1 OS=Labeo rohita OX=84645 GN=ROHU_013104 PE=4 SV=1	Labeo rohita
A0A498L7A8	RXN11136.1	Rhodopsin	C	canonical	0.999	0	3	0	3								A0A498L7A8	196	1				tr|A0A498L7A8|A0A498L7A8_LABRO Rhodopsin OS=Labeo rohita OX=84645 GN=ROHU_013075 PE=3 SV=1	Labeo rohita
A0A498L7B3	RXN04142.1	Aquaporin-9	C	weak	0.96	0	1	0	1								A0A498L7B3	197	1				tr|A0A498L7B3|A0A498L7B3_LABRO Aquaporin-9 OS=Labeo rohita OX=84645 GN=ROHU_034143 PE=3 SV=1	Labeo rohita
A0A498L7B8	RXN04240.1	Cadherin-4-like isoform X2	C	representative	0.996	0	3	0	2								A0A498L7B8	198	2				tr|A0A498L7B8|A0A498L7B8_LABRO Cadherin-4-like isoform X2 OS=Labeo rohita OX=84645 GN=ROHU_013085 PE=4 SV=1	Labeo rohita
A0A498L7C3	RXN04152.1	Sorbitol dehydrogenase-like protein	C	canonical	1	0	789	0	50								A0A498L7C3	199	1				tr|A0A498L7C3|A0A498L7C3_LABRO Sorbitol dehydrogenase-like protein OS=Labeo rohita OX=84645 GN=ROHU_034153 PE=3 SV=1	Labeo rohita
A0A498L7E3	RXN04018.1	Transcription factor-like isoform X2	C	canonical	0.994	0	4	0	3								A0A498L7E3	200	1				tr|A0A498L7E3|A0A498L7E3_LABRO Transcription factor-like isoform X2 OS=Labeo rohita OX=84645 GN=ROHU_028915 PE=4 SV=1	Labeo rohita
A0A498L7G1	RXN03353.1	Rapunzel 2	C	canonical	1	0	18	0	12								A0A498L7G1	201	3				tr|A0A498L7G1|A0A498L7G1_LABRO Rapunzel 2 OS=Labeo rohita OX=84645 GN=ROHU_034443 PE=4 SV=1	Labeo rohita
A0A498L7G7		Neurobeachin-like isoform X7	C	weak	0.968	0	1	0	1								A0A498L7G7	202	2				tr|A0A498L7G7|A0A498L7G7_LABRO Neurobeachin-like isoform X7 OS=Labeo rohita OX=84645 GN=ROHU_035724 PE=4 SV=1	Labeo rohita
A0A498L7J7	RXN04310.1	Spindle and kinetochore-associated 2	C	weak	0.999	0	1	0	1								A0A498L7J7	203	2				tr|A0A498L7J7|A0A498L7J7_LABRO Spindle and kinetochore-associated 2 OS=Labeo rohita OX=84645 GN=ROHU_034088 PE=4 SV=1	Labeo rohita
A0A498L7M3	RXN02444.1	Limbic system-associated membrane isoform X2	C	canonical	0.999	0	97	0	12								A0A498L7M3	204	1				tr|A0A498L7M3|A0A498L7M3_LABRO Limbic system-associated membrane isoform X2 OS=Labeo rohita OX=84645 GN=ROHU_035010 PE=4 SV=1	Labeo rohita
A0A498L7M4	RXN04242.1	Bactericidal permeability-increasing-like protein	C	representative	0.999	0	32	0	11								A0A498L7M4	205	13				tr|A0A498L7M4|A0A498L7M4_LABRO Bactericidal permeability-increasing-like protein OS=Labeo rohita OX=84645 GN=ROHU_013087 PE=4 SV=1	Labeo rohita
A0A498MPI5	RXN21713.1	Bactericidal permeability-increasing-like protein	C	marginally distinguished	1	0	28	0	8								A0A498L7M4	205	13				tr|A0A498MPI5|A0A498MPI5_LABRO Bactericidal permeability-increasing-like protein OS=Labeo rohita OX=84645 GN=ROHU_023962 PE=4 SV=1	Labeo rohita
A0A498NU03	RXN35610.1	Bactericidal permeability-increasing-like protein	C	representative	0.999	0	31	0	11								A0A498L7M4	205	13				tr|A0A498NU03|A0A498NU03_LABRO Bactericidal permeability-increasing-like protein OS=Labeo rohita OX=84645 GN=ROHU_014198 PE=4 SV=1	Labeo rohita
A0A498NVK2		Bactericidal permeability-increasing-like protein	C	representative	0.999	0	21	0	10								A0A498L7M4	205	13				tr|A0A498NVK2|A0A498NVK2_LABRO Bactericidal permeability-increasing-like protein OS=Labeo rohita OX=84645 GN=ROHU_014197 PE=4 SV=1	Labeo rohita
A0A498L7M8	RXN03413.1	Reticulon	C	canonical	0.999	0	190	0	15								A0A498L7M8	206	1				tr|A0A498L7M8|A0A498L7M8_LABRO Reticulon OS=Labeo rohita OX=84645 GN=ROHU_013432 PE=4 SV=1	Labeo rohita
A0A498L7M9	RXN04381.1	Diacylglycerol O-acyltransferase 2	C	representative	1	0	32	0	11								A0A498L7M9	207	2				tr|A0A498L7M9|A0A498L7M9_LABRO Diacylglycerol O-acyltransferase 2 OS=Labeo rohita OX=84645 GN=ROHU_013022 PE=4 SV=1	Labeo rohita
A0A498L7N5	RXN02836.1	Vacuolar sorting-associated 8-like protein	C	canonical	0.998	0	6	0	5								A0A498L7N5	208	1				tr|A0A498L7N5|A0A498L7N5_LABRO Vacuolar sorting-associated 8-like protein OS=Labeo rohita OX=84645 GN=ROHU_013699 PE=4 SV=1	Labeo rohita
A0A498L7P5	RXN02464.1	Arf-GAP with Rho-GAP ANK repeat and PH domain-containing 1 isoform X1	C	indistinguishable representative	0.999	0	17	0	9								A0A498L7P5	209	2				tr|A0A498L7P5|A0A498L7P5_LABRO Arf-GAP with Rho-GAP ANK repeat and PH domain-containing 1 isoform X1 OS=Labeo rohita OX=84645 GN=ROHU_035871 PE=4 SV=1	Labeo rohita
A0A498L7Q0	RXN02856.1	Gem-associated 8	C	canonical	0.999	0	11	0	3								A0A498L7Q0	210	1				tr|A0A498L7Q0|A0A498L7Q0_LABRO Gem-associated 8 OS=Labeo rohita OX=84645 GN=ROHU_013719 PE=4 SV=1	Labeo rohita
A0A498L7Q3	RXN04401.1	DNA (Cytosine-5)-methyltransferase 1-like protein	C	canonical	0.999	0	7	0	6								A0A498L7Q3	211	1				tr|A0A498L7Q3|A0A498L7Q3_LABRO DNA (Cytosine-5)-methyltransferase 1-like protein OS=Labeo rohita OX=84645 GN=ROHU_034036 PE=3 SV=1	Labeo rohita
A0A498L6P1		Electroneutral sodium bicarbonate exchanger 1-like isoform X1	C	indistinguishable representative	0.999	0	12	0	8								A0A498L7R2	212	10				tr|A0A498L6P1|A0A498L6P1_LABRO Electroneutral sodium bicarbonate exchanger 1-like isoform X1 OS=Labeo rohita OX=84645 GN=ROHU_013218 PE=4 SV=1	Labeo rohita
A0A498L7R2	RXN04380.1	Microtubule-associated 6-like protein	C	canonical	1	0	307	0	33								A0A498L7R2	212	10				tr|A0A498L7R2|A0A498L7R2_LABRO Microtubule-associated 6-like protein OS=Labeo rohita OX=84645 GN=ROHU_013021 PE=4 SV=1	Labeo rohita
A0A498L7R5	RXN27591.1	Malate dehydrogenase (EC 1.1.1.37)	C	canonical	1	0	7006	0	111								A0A498L7R5	213	1				tr|A0A498L7R5|A0A498L7R5_LABRO Malate dehydrogenase OS=Labeo rohita OX=84645 GN=ROHU_019959 PE=3 SV=1	Labeo rohita
A0A498L7R9	RXN02876.1	Ubiquitin-conjugating enzyme E2 variant 3-like protein	C	canonical	0.999	0	4	0	3								A0A498L7R9	214	1				tr|A0A498L7R9|A0A498L7R9_LABRO Ubiquitin-conjugating enzyme E2 variant 3-like protein OS=Labeo rohita OX=84645 GN=ROHU_021768 PE=4 SV=1	Labeo rohita
A0A498L7S6		Cartilage intermediate layer 1-like protein	C	weak	0.982	0	1	0	1								A0A498L7S6	215	2				tr|A0A498L7S6|A0A498L7S6_LABRO Cartilage intermediate layer 1-like protein OS=Labeo rohita OX=84645 GN=ROHU_034159 PE=4 SV=1	Labeo rohita
A0A498L7T5	RXN04400.1	Eukaryotic translation initiation factor 3 subunit G (eIF3g) (Eukaryotic translation initiation factor 3 RNA-binding subunit) (eIF-3 RNA-binding subunit) (Eukaryotic translation initiation factor 3 subunit 4)	C	canonical	1	0	512	0	34								A0A498L7T5	216	1				tr|A0A498L7T5|A0A498L7T5_LABRO Eukaryotic translation initiation factor 3 subunit G OS=Labeo rohita OX=84645 GN=EIF3G PE=3 SV=1	Labeo rohita
A0A498L7U9	RXN02906.1	Exosome complex component RRP46	C	canonical	0.998	0	8	0	4								A0A498L7U9	217	1				tr|A0A498L7U9|A0A498L7U9_LABRO Exosome complex component RRP46 OS=Labeo rohita OX=84645 GN=ROHU_034748 PE=4 SV=1	Labeo rohita
A0A498L7V7	RXN04461.1	15-hydroxyprostaglandin dehydrogenase [NAD(+)]-like protein	C	canonical	1	0	99	0	11								A0A498L7V7	218	1				tr|A0A498L7V7|A0A498L7V7_LABRO 15-hydroxyprostaglandin dehydrogenase [NAD(+)]-like protein OS=Labeo rohita OX=84645 GN=ROHU_012952 PE=3 SV=1	Labeo rohita
A0A498L7Y3	RXN04440.1	Peptidylprolyl isomerase (EC 5.2.1.8)	C	canonical	1	0	161	0	12								A0A498L7Y3	219	1				tr|A0A498L7Y3|A0A498L7Y3_LABRO Peptidylprolyl isomerase OS=Labeo rohita OX=84645 GN=ROHU_012931 PE=4 SV=1	Labeo rohita
A0A498L7Z1	RXN03473.1	Phosphoribosyl pyrophosphate synthase-associated 2	C	indistinguishable representative	0.999	0	313	0	21								A0A498L7Z1	220	2				tr|A0A498L7Z1|A0A498L7Z1_LABRO Phosphoribosyl pyrophosphate synthase-associated 2 OS=Labeo rohita OX=84645 GN=ROHU_013492 PE=4 SV=1	Labeo rohita
A0A498L7Z3	RXN04352.1	RanBP-type and C3HC4-type zinc finger-containing 1-like protein	C	indistinguishable representative	0.998	0	4	0	3								A0A498L7Z3	221	2				tr|A0A498L7Z3|A0A498L7Z3_LABRO RanBP-type and C3HC4-type zinc finger-containing 1-like protein OS=Labeo rohita OX=84645 GN=ROHU_012993 PE=4 SV=1	Labeo rohita
A0A498L800	RXN33171.1	Cytochrome c oxidase subunit 6A, mitochondrial (Cytochrome c oxidase polypeptide VIa)	C	canonical	1	0	117	0	9								A0A498L800	222	1				tr|A0A498L800|A0A498L800_LABRO Cytochrome c oxidase subunit 6A, mitochondrial OS=Labeo rohita OX=84645 GN=ROHU_015770 PE=3 SV=1	Labeo rohita
A0A498L807		Receptor-type tyrosine-phosphatase eta-like protein	C	weak	0.984	0	2	0	1								A0A498L807	223	4				tr|A0A498L807|A0A498L807_LABRO Receptor-type tyrosine-phosphatase eta-like protein OS=Labeo rohita OX=84645 GN=ROHU_013606 PE=4 SV=1	Labeo rohita
A0A498L812	RXN02584.1	ER membrane complex subunit 10 isoform X1	C	indistinguishable representative	1	0	101	0	10								A0A498L812	224	2				tr|A0A498L812|A0A498L812_LABRO ER membrane complex subunit 10 isoform X1 OS=Labeo rohita OX=84645 GN=ROHU_034934 PE=4 SV=1	Labeo rohita
A0A498L827	RXN04480.1	PiggyBac transposable element-derived 3-like protein	C	weak	0.936	0	16	0	1								A0A498L827	225	1				tr|A0A498L827|A0A498L827_LABRO PiggyBac transposable element-derived 3-like protein OS=Labeo rohita OX=84645 GN=ROHU_034024 PE=4 SV=1	Labeo rohita
A0A498L837	RXN04541.1	Glycerol-3-phosphate phosphatase	C	canonical	0.999	0	118	0	16								A0A498L837	226	1				tr|A0A498L837|A0A498L837_LABRO Glycerol-3-phosphate phosphatase OS=Labeo rohita OX=84645 GN=ROHU_033895 PE=3 SV=1	Labeo rohita
A0A498L849	RXN04459.1	Neuronal membrane glyco M6-a	C	canonical	1	0	395	0	18								A0A498L849	227	2				tr|A0A498L849|A0A498L849_LABRO Neuronal membrane glyco M6-a OS=Labeo rohita OX=84645 GN=ROHU_012950 PE=4 SV=1	Labeo rohita
A0A498LGQ1	RXN07479.1	Neuronal membrane glyco M6-a	C	canonical	0.999	0	227	0	14								A0A498L849	227	2				tr|A0A498LGQ1|A0A498LGQ1_LABRO Neuronal membrane glyco M6-a OS=Labeo rohita OX=84645 GN=ROHU_035462 PE=4 SV=1	Labeo rohita
A0A498L851	RXN03533.1	ATP-dependent RNA helicase TDRD12	C	canonical	1	0	65	0	29								A0A498L851	228	2				tr|A0A498L851|A0A498L851_LABRO ATP-dependent RNA helicase TDRD12 OS=Labeo rohita OX=84645 GN=ROHU_013348 PE=4 SV=1	Labeo rohita
A0A498L856		Butyrophilin subfamily 1 member A1-like isoform X1	C	weak	0.972	0	1	0	1								A0A498L856	229	20				tr|A0A498L856|A0A498L856_LABRO Butyrophilin subfamily 1 member A1-like isoform X1 OS=Labeo rohita OX=84645 GN=ROHU_034066 PE=4 SV=1	Labeo rohita
A0A498L864	RXN02634.1	Obscurin isoform X19	C	representative	0.999	0	391	0	110								A0A498L864	230	9				tr|A0A498L864|A0A498L864_LABRO Obscurin isoform X19 OS=Labeo rohita OX=84645 GN=ROHU_034810 PE=4 SV=1	Labeo rohita
A0A498MFW4		Restin-like protein	C	marginally distinguished	1	0	5	0	3								A0A498L864	230	9				tr|A0A498MFW4|A0A498MFW4_LABRO Restin-like protein OS=Labeo rohita OX=84645 GN=ROHU_025166 PE=4 SV=1	Labeo rohita
A0A498MN77	RXN20126.1	Restin-like protein	C	indistinguishable representative	1	0	10	0	6								A0A498L864	230	9				tr|A0A498MN77|A0A498MN77_LABRO Restin-like protein OS=Labeo rohita OX=84645 GN=ROHU_025164 PE=4 SV=1	Labeo rohita
A0A498N6Z5	RXN24665.1	Obscurin isoform X17	C	marginally distinguished	0.999	0	392	0	110								A0A498L864	230	9				tr|A0A498N6Z5|A0A498N6Z5_LABRO Obscurin isoform X17 OS=Labeo rohita OX=84645 GN=ROHU_022077 PE=4 SV=1	Labeo rohita
A0A498L873	RXN04530.1	MKL myocardin 2 isoform X2	C	canonical	0.996	0	2	0	2								A0A498L873	231	1				tr|A0A498L873|A0A498L873_LABRO MKL myocardin 2 isoform X2 OS=Labeo rohita OX=84645 GN=ROHU_030160 PE=4 SV=1	Labeo rohita
A0A498L876	RXN22362.1	Rho guanine nucleotide exchange factor 10 isoform X1	C	representative	0.999	0	3	0	2								A0A498L876	232	3				tr|A0A498L876|A0A498L876_LABRO Rho guanine nucleotide exchange factor 10 isoform X1 OS=Labeo rohita OX=84645 GN=ROHU_023491 PE=4 SV=1	Labeo rohita
A0A498N1S1		Rho guanine nucleotide exchange factor 10 isoform X1	C	indistinguishable representative	0.999	0	16	0	7								A0A498L876	232	3				tr|A0A498N1S1|A0A498N1S1_LABRO Rho guanine nucleotide exchange factor 10 isoform X1 OS=Labeo rohita OX=84645 GN=ROHU_021007 PE=4 SV=1	Labeo rohita
A0A498L877	RXN04489.1	Zinc finger CCCH domain-containing 13-like protein	C	representative	0.983	0	58	0	2								A0A498L877	233	1				tr|A0A498L877|A0A498L877_LABRO Zinc finger CCCH domain-containing 13-like protein OS=Labeo rohita OX=84645 GN=ROHU_035704 PE=4 SV=1	Labeo rohita
A0A498L879	RXN04432.1	Fatty-acid amide hydrolase 2-A-like protein	C	canonical	0.999	0	25	0	9								A0A498L879	234	1				tr|A0A498L879|A0A498L879_LABRO Fatty-acid amide hydrolase 2-A-like protein OS=Labeo rohita OX=84645 GN=ROHU_012923 PE=4 SV=1	Labeo rohita
A0A498L885	RXN04540.1	Rho GTPase-activating 17 isoform X1	C	canonical	0.999	0	43	0	11								A0A498L885	235	4				tr|A0A498L885|A0A498L885_LABRO Rho GTPase-activating 17 isoform X1 OS=Labeo rohita OX=84645 GN=ROHU_033894 PE=4 SV=1	Labeo rohita
A0A498MKF5	RXN19814.1	Rho GTPase-activating 17-like isoform X1	C	marginally distinguished	0.998	0	13	0	3								A0A498L885	235	4				tr|A0A498MKF5|A0A498MKF5_LABRO Rho GTPase-activating 17-like isoform X1 OS=Labeo rohita OX=84645 GN=ROHU_025492 PE=4 SV=1	Labeo rohita
A0A498MKX8	RXN19994.1	Rho GTPase-activating 17-like isoform X3	C	representative	0.999	0	25	0	7								A0A498L885	235	4				tr|A0A498MKX8|A0A498MKX8_LABRO Rho GTPase-activating 17-like isoform X3 OS=Labeo rohita OX=84645 GN=ROHU_025296 PE=4 SV=1	Labeo rohita
A0A498L8B5	RXN02684.1	60S ribosomal l10	C	canonical	1	0	1322	0	35								A0A498L8B5	236	1				tr|A0A498L8B5|A0A498L8B5_LABRO 60S ribosomal l10 OS=Labeo rohita OX=84645 GN=ROHU_022968 PE=4 SV=1	Labeo rohita
A0A498L8C2	RXN04539.1	Leucine carboxyl methyltransferase 1 (EC 2.1.1.233)	C	canonical	0.999	0	7	0	4								A0A498L8C2	237	1				tr|A0A498L8C2|A0A498L8C2_LABRO Leucine carboxyl methyltransferase 1 OS=Labeo rohita OX=84645 GN=ROHU_033893 PE=3 SV=1	Labeo rohita
A0A498L8C8	RXN04631.1	Thymidylate kinase	C	canonical	0.999	0	6	0	3								A0A498L8C8	238	1				tr|A0A498L8C8|A0A498L8C8_LABRO Thymidylate kinase OS=Labeo rohita OX=84645 GN=ROHU_033985 PE=3 SV=1	Labeo rohita
A0A498L5K4	RXN02703.1	Brefeldin A-inhibited guanine nucleotide-exchange 2-like protein	C	indistinguishable representative	0.998	0	18	0	8								A0A498L8D0	239	4				tr|A0A498L5K4|A0A498L5K4_LABRO Brefeldin A-inhibited guanine nucleotide-exchange 2-like protein OS=Labeo rohita OX=84645 GN=ROHU_034879 PE=4 SV=1	Labeo rohita
A0A498L8D0	RXN23545.1	Brefeldin A-inhibited guanine nucleotide-exchange 2-like protein	C	canonical	0.997	0	7	0	4								A0A498L8D0	239	4				tr|A0A498L8D0|A0A498L8D0_LABRO Brefeldin A-inhibited guanine nucleotide-exchange 2-like protein OS=Labeo rohita OX=84645 GN=ROHU_022951 PE=4 SV=1	Labeo rohita
A0A498L8D7	RXN04641.1	E3 ubiquitin-ligase AMFR-like protein	C	canonical	0.995	0	5	0	2								A0A498L8D7	240	1				tr|A0A498L8D7|A0A498L8D7_LABRO E3 ubiquitin-ligase AMFR-like protein OS=Labeo rohita OX=84645 GN=ROHU_035694 PE=4 SV=1	Labeo rohita
A0A498L8E0		Glutaminyl-peptide cyclotransferase-like protein	C	indistinguishable representative	0.995	0	7	0	4								A0A498L8E0	241	3				tr|A0A498L8E0|A0A498L8E0_LABRO Glutaminyl-peptide cyclotransferase-like protein OS=Labeo rohita OX=84645 GN=ROHU_034408 PE=4 SV=1	Labeo rohita
A0A498L8E1	RXN04378.1	Autophagy-related protein 101	C	canonical	0.999	0	12	0	2								A0A498L8E1	242	1				tr|A0A498L8E1|A0A498L8E1_LABRO Autophagy-related protein 101 OS=Labeo rohita OX=84645 GN=ROHU_013019 PE=4 SV=1	Labeo rohita
A0A498L8G0	RXN03136.1	Transporter	C	canonical	0.999	0	65	0	11								A0A498L8G0	243	2				tr|A0A498L8G0|A0A498L8G0_LABRO Transporter OS=Labeo rohita OX=84645 GN=ROHU_035829 PE=3 SV=1	Labeo rohita
A0A498L8H1	RXN04630.1	Serine--pyruvate aminotransferase (EC 2.6.1.44) (EC 2.6.1.51) (Alanine--glyoxylate aminotransferase)	C	canonical	1	0	615	0	38								A0A498L8H1	244	1				tr|A0A498L8H1|A0A498L8H1_LABRO Serine--pyruvate aminotransferase OS=Labeo rohita OX=84645 GN=ROHU_033984 PE=3 SV=1	Labeo rohita
A0A498L8J1		Coiled-coil domain-containing protein 149-B-like	C	canonical	0.998	0	3	0	3								A0A498L8J1	245	1				tr|A0A498L8J1|A0A498L8J1_LABRO Coiled-coil domain-containing protein 149-B-like OS=Labeo rohita OX=84645 GN=ROHU_012929 PE=4 SV=1	Labeo rohita
A0A498L8J5	RXN03663.1	Macrophage stimulating	C	canonical	1	0	173	0	24								A0A498L8J5	246	1				tr|A0A498L8J5|A0A498L8J5_LABRO Macrophage stimulating OS=Labeo rohita OX=84645 GN=ROHU_034373 PE=4 SV=1	Labeo rohita
A0A498L8J9	RXN03186.1	Lysophosphatidic acid phosphatase type 6-like protein	C	canonical	0.999	0	46	0	9								A0A498L8J9	247	1				tr|A0A498L8J9|A0A498L8J9_LABRO Lysophosphatidic acid phosphatase type 6-like protein OS=Labeo rohita OX=84645 GN=ROHU_018707 PE=3 SV=1	Labeo rohita
A0A498L8K3		Archaemetzincin-2 isoform X1	C	weak	0.96	0	1	0	1								A0A498L8K3	248	1				tr|A0A498L8K3|A0A498L8K3_LABRO Archaemetzincin-2 isoform X1 OS=Labeo rohita OX=84645 GN=ROHU_030137 PE=4 SV=1	Labeo rohita
A0A498L8K6	RXN04458.1	WD repeat-containing 17-like isoform X1	C	canonical	0.999	0	15	0	7								A0A498L8K6	249	1				tr|A0A498L8K6|A0A498L8K6_LABRO WD repeat-containing 17-like isoform X1 OS=Labeo rohita OX=84645 GN=ROHU_012949 PE=4 SV=1	Labeo rohita
A0A498L8L0	RXN11202.1	PHD finger-like domain-containing 5A	C	canonical	1	0	50	0	6								A0A498L8L0	250	1				tr|A0A498L8L0|A0A498L8L0_LABRO PHD finger-like domain-containing 5A OS=Labeo rohita OX=84645 GN=ROHU_030148 PE=4 SV=1	Labeo rohita
A0A498L8L2	RXN02247.1	AMP deaminase 2-like isoform X1	C	canonical	0.999	0	12	0	5								A0A498L8L2	251	1				tr|A0A498L8L2|A0A498L8L2_LABRO AMP deaminase 2-like isoform X1 OS=Labeo rohita OX=84645 GN=ROHU_013848 PE=4 SV=1	Labeo rohita
A0A498L8L6	RXN04731.1	E3 ubiquitin-ligase RNF38-like protein	C	canonical	0.999	0	23	0	10								A0A498L8L6	252	2				tr|A0A498L8L6|A0A498L8L6_LABRO E3 ubiquitin-ligase RNF38-like protein OS=Labeo rohita OX=84645 GN=ROHU_035680 PE=4 SV=1	Labeo rohita
A0A498L8L8	RXN04680.1	Serine threonine-phosphatase CPPED1	C	canonical	1	0	130	0	13								A0A498L8L8	253	1				tr|A0A498L8L8|A0A498L8L8_LABRO Serine threonine-phosphatase CPPED1 OS=Labeo rohita OX=84645 GN=ROHU_030158 PE=4 SV=1	Labeo rohita
A0A498L8M4	RXN03693.1	Sphingomyelin phosphodiesterase 2-like protein	C	canonical	0.999	0	8	0	5								A0A498L8M4	254	3				tr|A0A498L8M4|A0A498L8M4_LABRO Sphingomyelin phosphodiesterase 2-like protein OS=Labeo rohita OX=84645 GN=ROHU_034355 PE=4 SV=1	Labeo rohita
A0A498L8N9	RXN03236.1	Transcription elongation factor A 2-like protein	C	indistinguishable representative	0.999	0	46	0	10								A0A498L8N9	255	2				tr|A0A498L8N9|A0A498L8N9_LABRO Transcription elongation factor A 2-like protein OS=Labeo rohita OX=84645 GN=ROHU_034529 PE=4 SV=1	Labeo rohita
A0A498L8P4	RXN04761.1	Cell division cycle 23-like protein	C	indistinguishable representative	0.999	0	4	0	3								A0A498L8P4	256	2				tr|A0A498L8P4|A0A498L8P4_LABRO Cell division cycle 23-like protein OS=Labeo rohita OX=84645 GN=ROHU_033744 PE=4 SV=1	Labeo rohita
A0A498L8P7	RXN10113.1	Complement C1q tumor necrosis factor-related 1-like protein	C	weak	0.998	0	4	0	1								A0A498L8P7	257	1				tr|A0A498L8P7|A0A498L8P7_LABRO Complement C1q tumor necrosis factor-related 1-like protein OS=Labeo rohita OX=84645 GN=ROHU_013299 PE=4 SV=1	Labeo rohita
A0A498L8Q0	RXN04619.1	Phosphatidylinositol 3,4,5-trisphosphate 5-phosphatase 1-like protein	C	canonical	1	0	279	0	46								A0A498L8Q0	258	1				tr|A0A498L8Q0|A0A498L8Q0_LABRO Phosphatidylinositol 3,4,5-trisphosphate 5-phosphatase 1-like protein OS=Labeo rohita OX=84645 GN=ROHU_025752 PE=4 SV=1	Labeo rohita
A0A498L8Q9	RXN04629.1	Mitochondrial-like protein	C	canonical	0.999	0	35	0	11								A0A498L8Q9	259	1				tr|A0A498L8Q9|A0A498L8Q9_LABRO Mitochondrial-like protein OS=Labeo rohita OX=84645 GN=ROHU_033983 PE=4 SV=1	Labeo rohita
A0A498L8R1	RXN03256.1	Neural cell adhesion molecule 1-like isoform X3	C	canonical	0.999	0	46	0	12								A0A498L8R1	260	1				tr|A0A498L8R1|A0A498L8R1_LABRO Neural cell adhesion molecule 1-like isoform X3 OS=Labeo rohita OX=84645 GN=ROHU_013536 PE=4 SV=1	Labeo rohita
A0A498L8R5	RXN02794.1	LIM domain only 7-like protein	C	canonical	0.999	0	3	0	3								A0A498L8R5	261	1				tr|A0A498L8R5|A0A498L8R5_LABRO LIM domain only 7-like protein OS=Labeo rohita OX=84645 GN=ROHU_013657 PE=4 SV=1	Labeo rohita
A0A498L8S4	RXN02804.1	Glycogenin-1-like isoform X1	C	representative	0.983	0	66	0	2								A0A498L8S4	262	1				tr|A0A498L8S4|A0A498L8S4_LABRO Glycogenin-1-like isoform X1 OS=Labeo rohita OX=84645 GN=ROHU_013667 PE=4 SV=1	Labeo rohita
A0A498L8S6	RXN08034.1	Methyltransferase 7A	C	canonical	1	0	220	0	10								A0A498L8S6	263	3				tr|A0A498L8S6|A0A498L8S6_LABRO Methyltransferase 7A OS=Labeo rohita OX=84645 GN=ROHU_011720 PE=4 SV=1	Labeo rohita
A0A498L8S8		Serine incorporator 2-like protein	C	weak	0.975	0	1	0	1								A0A498L8S8	264	2				tr|A0A498L8S8|A0A498L8S8_LABRO Serine incorporator 2-like protein OS=Labeo rohita OX=84645 GN=ROHU_035079 PE=4 SV=1	Labeo rohita
A0A498L8T0	RXN04632.1	Cysteine protease (EC 3.4.22.-)	C	canonical	0.998	0	5	0	3								A0A498L8T0	265	1				tr|A0A498L8T0|A0A498L8T0_LABRO Cysteine protease OS=Labeo rohita OX=84645 GN=ROHU_033986 PE=3 SV=1	Labeo rohita
A0A498L8T1	RXN04538.1	Aquaporin-8-like protein	C	representative	0.999	0	22	0	2								A0A498L8T1	266	1				tr|A0A498L8T1|A0A498L8T1_LABRO Aquaporin-8-like protein OS=Labeo rohita OX=84645 GN=ROHU_033892 PE=3 SV=1	Labeo rohita
A0A498L8T2	RXN02814.1	Steryl-sulfatase isoform X1	C	canonical	0.995	0	11	0	5								A0A498L8T2	267	1				tr|A0A498L8T2|A0A498L8T2_LABRO Steryl-sulfatase isoform X1 OS=Labeo rohita OX=84645 GN=ROHU_013677 PE=4 SV=1	Labeo rohita
A0A498L8T4	RXN28518.1	15-hydroxyprostaglandin dehydrogenase [NAD(+)]-like protein	C	canonical	1	0	740	0	40								A0A498L8T4	268	1				tr|A0A498L8T4|A0A498L8T4_LABRO 15-hydroxyprostaglandin dehydrogenase [NAD(+)]-like protein OS=Labeo rohita OX=84645 GN=ROHU_019119 PE=3 SV=1	Labeo rohita
A0A498L8T6	RXN03286.1	Arginine serine-rich coiled-coil 2-like isoform X3	C	weak	0.838	0	1	0	1								A0A498L8T6	269	1				tr|A0A498L8T6|A0A498L8T6_LABRO Arginine serine-rich coiled-coil 2-like isoform X3 OS=Labeo rohita OX=84645 GN=ROHU_013566 PE=4 SV=1	Labeo rohita
A0A498L8T9		Transformation transcription domain-associated isoform X1	C	canonical	0.996	0	3	0	3								A0A498L8T9	270	1				tr|A0A498L8T9|A0A498L8T9_LABRO Transformation transcription domain-associated isoform X1 OS=Labeo rohita OX=84645 GN=ROHU_033902 PE=3 SV=1	Labeo rohita
A0A498L8U3	RXN11190.1	Monocarboxylate transporter 7-like protein	C	canonical	0.998	0	3	0	2								A0A498L8U3	271	1				tr|A0A498L8U3|A0A498L8U3_LABRO Monocarboxylate transporter 7-like protein OS=Labeo rohita OX=84645 GN=ROHU_030136 PE=4 SV=1	Labeo rohita
A0A498L8U4	RXN03773.1	Rho guanine nucleotide exchange factor 19-like protein	C	canonical	1	0	38	0	9								A0A498L8U4	272	1				tr|A0A498L8U4|A0A498L8U4_LABRO Rho guanine nucleotide exchange factor 19-like protein OS=Labeo rohita OX=84645 GN=ROHU_013223 PE=4 SV=1	Labeo rohita
A0A498L8V2	RXN04669.1	Aconitate hydratase, mitochondrial (Aconitase) (EC 4.2.1.-)	C	canonical	1	0	6767	0	126								A0A498L8V2	273	3				tr|A0A498L8V2|A0A498L8V2_LABRO Aconitate hydratase, mitochondrial OS=Labeo rohita OX=84645 GN=ROHU_033871 PE=3 SV=1	Labeo rohita
A0A498N102	RXN27799.1	Conserved oligomeric Golgi complex subunit 2	C	canonical	1	0	113	0	4								A0A498L8V2	273	3				tr|A0A498N102|A0A498N102_LABRO Conserved oligomeric Golgi complex subunit 2 OS=Labeo rohita OX=84645 GN=ROHU_019808 PE=4 SV=1	Labeo rohita
A0A498L8V7	RXN04831.1	Carboxypeptidase E	C	canonical	0.999	0	126	0	23								A0A498L8V7	274	1				tr|A0A498L8V7|A0A498L8V7_LABRO Carboxypeptidase E OS=Labeo rohita OX=84645 GN=ROHU_035676 PE=4 SV=1	Labeo rohita
A0A498L8W1	RXN03793.1	Peptidylprolyl isomerase (EC 5.2.1.8)	C	canonical	0.998	0	4	0	3								A0A498L8W1	275	1				tr|A0A498L8W1|A0A498L8W1_LABRO Peptidylprolyl isomerase OS=Labeo rohita OX=84645 GN=ROHU_013243 PE=4 SV=1	Labeo rohita
A0A498L8X6	RXN04810.1	Glutamate receptor 2-like isoform X2	C	canonical	0.999	0	84	0	21								A0A498L8X6	276	12				tr|A0A498L8X6|A0A498L8X6_LABRO Glutamate receptor 2-like isoform X2 OS=Labeo rohita OX=84645 GN=ROHU_033793 PE=3 SV=1	Labeo rohita
A0A498LHF4	RXN07352.1	Glutamate receptor 2 isoform X1	C	indistinguishable representative	0.999	0	109	0	22								A0A498L8X6	276	12				tr|A0A498LHF4|A0A498LHF4_LABRO Glutamate receptor 2 isoform X1 OS=Labeo rohita OX=84645 GN=ROHU_032272 PE=3 SV=1	Labeo rohita
A0A498LHN9		Glutamate receptor 1-like isoform X2	C	indistinguishable representative	0.999	0	23	0	6								A0A498L8X6	276	12				tr|A0A498LHN9|A0A498LHN9_LABRO Glutamate receptor 1-like isoform X2 OS=Labeo rohita OX=84645 GN=ROHU_032292 PE=3 SV=1	Labeo rohita
A0A498MV88	RXN23763.1	Glutamate receptor 3 isoform X2	C	canonical	0.999	0	62	0	15								A0A498L8X6	276	12				tr|A0A498MV88|A0A498MV88_LABRO Glutamate receptor 3 isoform X2 OS=Labeo rohita OX=84645 GN=ROHU_022591 PE=3 SV=1	Labeo rohita
A0A498MYG0		Glutamate receptor 4 isoform X1	C	marginally distinguished	0.999	0	17	0	4								A0A498L8X6	276	12				tr|A0A498MYG0|A0A498MYG0_LABRO Glutamate receptor 4 isoform X1 OS=Labeo rohita OX=84645 GN=ROHU_020461 PE=3 SV=1	Labeo rohita
A0A498N9C5	RXN29610.1	Glutamate receptor 3-like isoform X1	C	marginally distinguished	0.999	0	15	0	6								A0A498L8X6	276	12				tr|A0A498N9C5|A0A498N9C5_LABRO Glutamate receptor 3-like isoform X1 OS=Labeo rohita OX=84645 GN=ROHU_018340 PE=3 SV=1	Labeo rohita
A0A498L8X7		SZT2-like isoform X2	C	weak	0.967	0	1	0	1								A0A498L8X7	277	1				tr|A0A498L8X7|A0A498L8X7_LABRO SZT2-like isoform X2 OS=Labeo rohita OX=84645 GN=ROHU_035686 PE=4 SV=1	Labeo rohita
A0A498L8X8	RXN04699.1	RNA-binding 47-like isoform X1	C	indistinguishable representative	1	0	51	0	11								A0A498L8X8	278	2				tr|A0A498L8X8|A0A498L8X8_LABRO RNA-binding 47-like isoform X1 OS=Labeo rohita OX=84645 GN=ROHU_033821 PE=4 SV=1	Labeo rohita
A0A498L8X9	RXN03813.1	Macrophage-stimulating receptor-like isoform X1	C	canonical	0.997	0	4	0	2								A0A498L8X9	279	1				tr|A0A498L8X9|A0A498L8X9_LABRO Macrophage-stimulating receptor-like isoform X1 OS=Labeo rohita OX=84645 GN=ROHU_013263 PE=3 SV=1	Labeo rohita
A0A498L8Z1	RXN04702.1	Tyrosine-phosphatase non-receptor type 9-like isoform X2	C	representative	0.994	0	17	0	3								A0A498L8Z1	280	2				tr|A0A498L8Z1|A0A498L8Z1_LABRO Tyrosine-phosphatase non-receptor type 9-like isoform X2 OS=Labeo rohita OX=84645 GN=ROHU_033824 PE=4 SV=1	Labeo rohita
A0A498L900		Glucoside xylosyltransferase 2-like protein	C	weak	0.885	0	1	0	1								A0A498L900	281	1				tr|A0A498L900|A0A498L900_LABRO Glucoside xylosyltransferase 2-like protein OS=Labeo rohita OX=84645 GN=ROHU_013283 PE=4 SV=1	Labeo rohita
A0A498L907	RXN04840.1	CTP synthase (EC 6.3.4.2) (UTP--ammonia ligase)	C	canonical	0.999	0	53	0	11								A0A498L907	282	1				tr|A0A498L907|A0A498L907_LABRO CTP synthase OS=Labeo rohita OX=84645 GN=ROHU_012846 PE=3 SV=1	Labeo rohita
A0A498L908	RXN02377.1	Sorting nexin-17 isoform X1	C	representative	0.999	0	14	0	8								A0A498L908	283	3				tr|A0A498L908|A0A498L908_LABRO Sorting nexin-17 isoform X1 OS=Labeo rohita OX=84645 GN=ROHU_013784 PE=4 SV=1	Labeo rohita
A0A498L910	RXN03843.1	Deoxyribonuclease TATDN2 isoform X1	C	indistinguishable representative	0.996	0	3	0	3								A0A498L910	284	2				tr|A0A498L910|A0A498L910_LABRO Deoxyribonuclease TATDN2 isoform X1 OS=Labeo rohita OX=84645 GN=ROHU_035759 PE=4 SV=1	Labeo rohita
A0A498L913	RXN04850.1	Regulator of chromosome condensation-like protein	C	canonical	0.999	0	86	0	13								A0A498L913	285	1				tr|A0A498L913|A0A498L913_LABRO Regulator of chromosome condensation-like protein OS=Labeo rohita OX=84645 GN=ROHU_012856 PE=4 SV=1	Labeo rohita
A0A498L914	RXN04739.1	Long-chain-fatty-acid--ligase 6-like isoform X2	C	canonical	0.999	0	32	0	12								A0A498L914	286	1				tr|A0A498L914|A0A498L914_LABRO Long-chain-fatty-acid--ligase 6-like isoform X2 OS=Labeo rohita OX=84645 GN=ROHU_008527 PE=4 SV=1	Labeo rohita
A0A498L915	RXN03366.1	Synaptic vesicle glyco 2A	C	canonical	0.999	0	138	0	19								A0A498L915	287	1				tr|A0A498L915|A0A498L915_LABRO Synaptic vesicle glyco 2A OS=Labeo rohita OX=84645 GN=ROHU_035808 PE=3 SV=1	Labeo rohita
A0A498L931	RXN03863.1	Isocitrate dehydrogenase [NAD] subunit, mitochondrial	C	indistinguishable representative	1	0	1125	0	38								A0A498L931	288	2				tr|A0A498L931|A0A498L931_LABRO Isocitrate dehydrogenase [NAD] subunit, mitochondrial OS=Labeo rohita OX=84645 GN=ROHU_034320 PE=3 SV=1	Labeo rohita
A0A498L936	RXN04648.1	Mediator of RNA polymerase II transcription subunit 8 (Mediator complex subunit 8)	C	weak	0.987	0	1	0	1								A0A498L936	289	1				tr|A0A498L936|A0A498L936_LABRO Mediator of RNA polymerase II transcription subunit 8 OS=Labeo rohita OX=84645 GN=MED8 PE=3 SV=1	Labeo rohita
A0A498L938	RXN02407.1	Forkhead box P1-B-like isoform X1	C	indistinguishable representative	0.998	0	47	0	5								A0A498L938	290	7				tr|A0A498L938|A0A498L938_LABRO Forkhead box P1-B-like isoform X1 OS=Labeo rohita OX=84645 GN=ROHU_013771 PE=4 SV=1	Labeo rohita
A0A498L943	RXN04880.1	Store-operated calcium entry-associated regulatory factor-like isoform X1	C	indistinguishable representative	0.999	0	34	0	7								A0A498L943	291	2				tr|A0A498L943|A0A498L943_LABRO Store-operated calcium entry-associated regulatory factor-like isoform X1 OS=Labeo rohita OX=84645 GN=ROHU_012886 PE=4 SV=1	Labeo rohita
A0A498L961	RXN02427.1	Eukaryotic translation initiation factor 3 subunit K (eIF3k) (Eukaryotic translation initiation factor 3 subunit 12) (eIF-3 p25)	C	representative	1	0	246	0	11								A0A498L961	292	2				tr|A0A498L961|A0A498L961_LABRO Eukaryotic translation initiation factor 3 subunit K OS=Labeo rohita OX=84645 GN=EIF3K PE=3 SV=1	Labeo rohita
A0A498L962	RXN02944.1	Integral membrane 2C-like isoform X1	C	weak	0.996	0	5	0	1								A0A498L962	293	1				tr|A0A498L962|A0A498L962_LABRO Integral membrane 2C-like isoform X1 OS=Labeo rohita OX=84645 GN=ROHU_013584 PE=4 SV=1	Labeo rohita
A0A498L967	RXN04910.1	Spindlin-1	C	canonical	0.999	0	6	0	4								A0A498L967	294	1				tr|A0A498L967|A0A498L967_LABRO Spindlin-1 OS=Labeo rohita OX=84645 GN=ROHU_033653 PE=4 SV=1	Labeo rohita
A0A498L979	RXN04688.1	Translation machinery-associated 16	C	weak	0.946	0	3	0	1								A0A498L979	295	1				tr|A0A498L979|A0A498L979_LABRO Translation machinery-associated 16 OS=Labeo rohita OX=84645 GN=ROHU_021448 PE=4 SV=1	Labeo rohita
A0A498L990	RXN04698.1	Cytosol aminopeptidase	C	indistinguishable representative	1	0	283	0	25								A0A498L990	296	2				tr|A0A498L990|A0A498L990_LABRO Cytosol aminopeptidase OS=Labeo rohita OX=84645 GN=ROHU_033820 PE=3 SV=1	Labeo rohita
A0A498L9A1	RXN04789.1	Phospholipase B-like (EC 3.1.1.-)	C	indistinguishable representative	1	0	80	0	13								A0A498L9A1	297	4				tr|A0A498L9A1|A0A498L9A1_LABRO Phospholipase B-like OS=Labeo rohita OX=84645 GN=ROHU_033772 PE=3 SV=1	Labeo rohita
A0A498L9A3	RXN03456.1	Ribosomal_S17_N domain-containing protein	C	canonical	1	0	1160	0	33								A0A498L9A3	298	3				tr|A0A498L9A3|A0A498L9A3_LABRO Ribosomal_S17_N domain-containing protein OS=Labeo rohita OX=84645 GN=ROHU_013475 PE=3 SV=1	Labeo rohita
A0A498MK82	RXN21481.1	DnaJ-like protein	C	canonical	1	0	87	0	18								A0A498L9A3	298	3				tr|A0A498MK82|A0A498MK82_LABRO DnaJ-like protein OS=Labeo rohita OX=84645 GN=ROHU_024060 PE=4 SV=1	Labeo rohita
A0A498NDC8	RXN29246.1	DnaJ-like protein	C	canonical	1	0	136	0	22								A0A498L9A3	298	3				tr|A0A498NDC8|A0A498NDC8_LABRO DnaJ-like protein OS=Labeo rohita OX=84645 GN=ROHU_036297 PE=4 SV=1	Labeo rohita
A0A498L9C8	RXN02487.1	Cytochrome P450 4B1-like protein	C	canonical	0.999	0	63	0	17								A0A498L9C8	299	1				tr|A0A498L9C8|A0A498L9C8_LABRO Cytochrome P450 4B1-like protein OS=Labeo rohita OX=84645 GN=ROHU_013745 PE=3 SV=1	Labeo rohita
A0A498L9D0	RXN04980.1	E3 ubiquitin ISG15 ligase TRIM25-like protein	C	indistinguishable representative	0.999	0	11	0	6								A0A498L9D0	300	2				tr|A0A498L9D0|A0A498L9D0_LABRO E3 ubiquitin ISG15 ligase TRIM25-like protein OS=Labeo rohita OX=84645 GN=ROHU_035664 PE=4 SV=1	Labeo rohita
A0A498L9D2	RXN04748.1	Pterin-4-alpha-carbinolamine dehydratase 2-like protein	C	indistinguishable representative	0.999	0	35	0	8								A0A498L9D2	301	2				tr|A0A498L9D2|A0A498L9D2_LABRO Pterin-4-alpha-carbinolamine dehydratase 2-like protein OS=Labeo rohita OX=84645 GN=ROHU_033731 PE=3 SV=1	Labeo rohita
A0A498L9E0		WD repeat-containing 55	C	weak	0.984	0	2	0	1								A0A498L9E0	302	1				tr|A0A498L9E0|A0A498L9E0_LABRO WD repeat-containing 55 OS=Labeo rohita OX=84645 GN=ROHU_019120 PE=4 SV=1	Labeo rohita
A0A498L9F0	RXN04829.1	Thrombospondin type-1 domain-containing 4-like protein	C	canonical	0.999	0	98	0	15								A0A498L9F0	303	2				tr|A0A498L9F0|A0A498L9F0_LABRO Thrombospondin type-1 domain-containing 4-like protein OS=Labeo rohita OX=84645 GN=ROHU_035674 PE=4 SV=1	Labeo rohita
A0A498L9F5		Transforming acidic coiled-coil-containing 3-like isoform X1	C	indistinguishable representative	0.998	0	4	0	3								A0A498L9F5	304	2				tr|A0A498L9F5|A0A498L9F5_LABRO Transforming acidic coiled-coil-containing 3-like isoform X1 OS=Labeo rohita OX=84645 GN=ROHU_033613 PE=4 SV=1	Labeo rohita
A0A498L2A2	RXN02562.1	Complexin-1	C	indistinguishable representative	0.999	0	28	0	5								A0A498L9G2	305	3				tr|A0A498L2A2|A0A498L2A2_LABRO Complexin-1 OS=Labeo rohita OX=84645 GN=ROHU_034912 PE=4 SV=1	Labeo rohita
A0A498L9G2	RXN04872.1	Complexin-1-like protein	C	canonical	1	0	23	0	7								A0A498L9G2	305	3				tr|A0A498L9G2|A0A498L9G2_LABRO Complexin-1-like protein OS=Labeo rohita OX=84645 GN=ROHU_012878 PE=4 SV=1	Labeo rohita
A0A498L9G6	RXN03074.1	SH3 domain-binding glutamic acid-rich 3	C	canonical	0.982	0	5	0	2								A0A498L9G6	306	1				tr|A0A498L9G6|A0A498L9G6_LABRO SH3 domain-binding glutamic acid-rich 3 OS=Labeo rohita OX=84645 GN=ROHU_034660 PE=4 SV=1	Labeo rohita
A0A498L9G7		Sphingosine-1-phosphate phosphatase 1	C	weak	0.891	0	1	0	1								A0A498L9G7	307	2				tr|A0A498L9G7|A0A498L9G7_LABRO Sphingosine-1-phosphate phosphatase 1 OS=Labeo rohita OX=84645 GN=ROHU_033647 PE=4 SV=1	Labeo rohita
A0A498L9H0	RXN04798.1	OX-2 membrane glyco-like protein	C	canonical	1	0	230	0	20								A0A498L9H0	308	5				tr|A0A498L9H0|A0A498L9H0_LABRO OX-2 membrane glyco-like protein OS=Labeo rohita OX=84645 GN=ROHU_033781 PE=4 SV=1	Labeo rohita
A0A498MB99	RXN14785.1	Nectin-4-like isoform X1	C	marginally distinguished	1	0	225	0	18								A0A498L9H0	308	5				tr|A0A498MB99|A0A498MB99_LABRO Nectin-4-like isoform X1 OS=Labeo rohita OX=84645 GN=ROHU_008900 PE=4 SV=1	Labeo rohita
A0A498P038		Nectin-4-like isoform X1	C	marginally distinguished	1	0	180	0	17								A0A498L9H0	308	5				tr|A0A498P038|A0A498P038_LABRO Nectin-4-like isoform X1 OS=Labeo rohita OX=84645 GN=ROHU_001981 PE=4 SV=1	Labeo rohita
A0A498L9H5	RXN04849.1	Phosphatase and actin regulator	C	canonical	0.989	0	2	0	2								A0A498L9H5	309	1				tr|A0A498L9H5|A0A498L9H5_LABRO Phosphatase and actin regulator OS=Labeo rohita OX=84645 GN=ROHU_012855 PE=3 SV=1	Labeo rohita
A0A498L9J0	RXN03104.1	RNA-binding 15	C	canonical	0.999	0	10	0	6								A0A498L9J0	310	3				tr|A0A498L9J0|A0A498L9J0_LABRO RNA-binding 15 OS=Labeo rohita OX=84645 GN=ROHU_034690 PE=4 SV=1	Labeo rohita
A0A498L9J7		Ribosomal RNA processing 1-like protein	C	weak	0.827	0	2	0	1								A0A498L9J7	311	2				tr|A0A498L9J7|A0A498L9J7_LABRO Ribosomal RNA processing 1-like protein OS=Labeo rohita OX=84645 GN=ROHU_035673 PE=4 SV=1	Labeo rohita
A0A498L9K7	RXN04838.1	Bridging integrator 3	C	indistinguishable representative	0.999	0	9	0	7								A0A498L9K7	312	2				tr|A0A498L9K7|A0A498L9K7_LABRO Bridging integrator 3 OS=Labeo rohita OX=84645 GN=ROHU_012844 PE=4 SV=1	Labeo rohita
A0A498L9L3	RXN33180.1	5-demethoxyubiquinone mitochondrial-like protein	C	canonical	0.999	0	27	0	4								A0A498L9L3	313	1				tr|A0A498L9L3|A0A498L9L3_LABRO 5-demethoxyubiquinone mitochondrial-like protein OS=Labeo rohita OX=84645 GN=ROHU_015779 PE=4 SV=1	Labeo rohita
A0A498L9M3	RXN03576.1	Transmembrane emp24 domain-containing 6-like protein	C	indistinguishable representative	0.999	0	20	0	6								A0A498L9M3	314	3				tr|A0A498L9M3|A0A498L9M3_LABRO Transmembrane emp24 domain-containing 6-like protein OS=Labeo rohita OX=84645 GN=ROHU_035792 PE=3 SV=1	Labeo rohita
A0A498L9N2		Mitochondrial assembly of ribosomal large subunit 1	C	canonical	0.999	0	4	0	2								A0A498L9N2	315	1				tr|A0A498L9N2|A0A498L9N2_LABRO Mitochondrial assembly of ribosomal large subunit 1 OS=Labeo rohita OX=84645 GN=ROHU_012808 PE=3 SV=1	Labeo rohita
A0A498L9N6	RXN05080.1	Ribonucleases P MRP subunit POP1	C	canonical	0.999	0	29	0	16								A0A498L9N6	316	1				tr|A0A498L9N6|A0A498L9N6_LABRO Ribonucleases P MRP subunit POP1 OS=Labeo rohita OX=84645 GN=ROHU_035645 PE=4 SV=1	Labeo rohita
A0A498L9P7	RXN05090.1	PH domain-containing 6-like protein	C	canonical	0.996	0	4	0	4								A0A498L9P7	317	2				tr|A0A498L9P7|A0A498L9P7_LABRO PH domain-containing 6-like protein OS=Labeo rohita OX=84645 GN=ROHU_033579 PE=3 SV=1	Labeo rohita
A0A498L9Q3	RXN05091.1	NADH dehydrogenase [ubiquinone] 1 alpha subcomplex subunit 12	C	canonical	1	0	427	0	24								A0A498L9Q3	318	1				tr|A0A498L9Q3|A0A498L9Q3_LABRO NADH dehydrogenase [ubiquinone] 1 alpha subcomplex subunit 12 OS=Labeo rohita OX=84645 GN=ROHU_033580 PE=3 SV=1	Labeo rohita
A0A498L9R8	RXN04266.1	Inter-alpha-trypsin inhibitor heavy chain H2	C	canonical	1	0	875	0	37								A0A498L9R8	319	1				tr|A0A498L9R8|A0A498L9R8_LABRO Inter-alpha-trypsin inhibitor heavy chain H2 OS=Labeo rohita OX=84645 GN=ROHU_013039 PE=4 SV=1	Labeo rohita
A0A498L9S5	RXN04908.1	BPTI Kunitz domain-containing-like protein	C	canonical	1	0	150	0	15								A0A498L9S5	320	1				tr|A0A498L9S5|A0A498L9S5_LABRO BPTI Kunitz domain-containing-like protein OS=Labeo rohita OX=84645 GN=ROHU_033651 PE=4 SV=1	Labeo rohita
A0A498L9T1	RXN05111.1	Carboxypeptidase M	C	canonical	1	0	394	0	36								A0A498L9T1	321	1				tr|A0A498L9T1|A0A498L9T1_LABRO Carboxypeptidase M OS=Labeo rohita OX=84645 GN=ROHU_033600 PE=4 SV=1	Labeo rohita
A0A498L9U6		LRR and PYD domains-containing 1b allele 5-like protein	C	weak	0.976	0	1	0	1								A0A498L9U6	322	2				tr|A0A498L9U6|A0A498L9U6_LABRO LRR and PYD domains-containing 1b allele 5-like protein OS=Labeo rohita OX=84645 GN=ROHU_033671 PE=4 SV=1	Labeo rohita
A0A498L9U8	RXN05130.1	Uncharacterized protein	C	weak	0.987	0	1	0	1								A0A498L9U8	323	1				tr|A0A498L9U8|A0A498L9U8_LABRO Uncharacterized protein OS=Labeo rohita OX=84645 GN=ROHU_012773 PE=4 SV=1	Labeo rohita
A0A498L9U9	RXN05131.1	ARL14 effector-like protein	C	indistinguishable representative	0.999	0	7	0	4								A0A498L9U9	324	2				tr|A0A498L9U9|A0A498L9U9_LABRO ARL14 effector-like protein OS=Labeo rohita OX=84645 GN=ROHU_012774 PE=4 SV=1	Labeo rohita
A0A498L9V5	RXN03656.1	Kinase C and casein kinase substrate in neurons 1	C	canonical	0.999	0	119	0	17								A0A498L9V5	325	10				tr|A0A498L9V5|A0A498L9V5_LABRO Kinase C and casein kinase substrate in neurons 1 OS=Labeo rohita OX=84645 GN=ROHU_034366 PE=4 SV=1	Labeo rohita
A0A498LFW1	RXN05544.1	Ubiquitin carboxyl-terminal hydrolase 24 isoform X3	C	canonical	0.999	0	23	0	10								A0A498L9V5	325	10				tr|A0A498LFW1|A0A498LFW1_LABRO Ubiquitin carboxyl-terminal hydrolase 24 isoform X3 OS=Labeo rohita OX=84645 GN=ROHU_035600 PE=3 SV=1	Labeo rohita
A0A498M594		Ubiquitin carboxyl-terminal hydrolase 24 isoform X3	C	marginally distinguished	0.999	0	17	0	5								A0A498L9V5	325	10				tr|A0A498M594|A0A498M594_LABRO Ubiquitin carboxyl-terminal hydrolase 24 isoform X3 OS=Labeo rohita OX=84645 GN=ROHU_027780 PE=4 SV=1	Labeo rohita
A0A498NNU3	RXN33573.1	Kinase C and casein kinase substrate in neurons 1-like protein	C	marginally distinguished	1	0	582	0	41								A0A498L9V5	325	10				tr|A0A498NNU3|A0A498NNU3_LABRO Kinase C and casein kinase substrate in neurons 1-like protein OS=Labeo rohita OX=84645 GN=ROHU_004288 PE=4 SV=1	Labeo rohita
A0A498NRM4	RXN34722.1	Kinase C and casein kinase substrate in neurons 2 isoform X3	C	canonical	0.999	0	119	0	19								A0A498L9V5	325	10				tr|A0A498NRM4|A0A498NRM4_LABRO Kinase C and casein kinase substrate in neurons 2 isoform X3 OS=Labeo rohita OX=84645 GN=ROHU_014807 PE=4 SV=1	Labeo rohita
A0A498L9W2	RXN03234.1	XK-related protein	C	weak	0.989	0	3	0	1								A0A498L9W2	326	1				tr|A0A498L9W2|A0A498L9W2_LABRO XK-related protein OS=Labeo rohita OX=84645 GN=ROHU_030182 PE=3 SV=1	Labeo rohita
A0A498L9W3		Cytochrome c oxidase assembly COX16 mitochondrial	C	weak	0.983	0	1	0	1								A0A498L9W3	327	1				tr|A0A498L9W3|A0A498L9W3_LABRO Cytochrome c oxidase assembly COX16 mitochondrial OS=Labeo rohita OX=84645 GN=ROHU_030608 PE=4 SV=1	Labeo rohita
A0A498L9W6	RXN05150.1	SCY1 2 isoform X1	C	canonical	0.999	0	35	0	9								A0A498L9W6	328	1				tr|A0A498L9W6|A0A498L9W6_LABRO SCY1 2 isoform X1 OS=Labeo rohita OX=84645 GN=ROHU_012793 PE=4 SV=1	Labeo rohita
A0A498L9Y4		Regulating synaptic membrane exocytosis 2-like protein	C	weak	0.988	0	1	0	1								A0A498L9Y4	329	1				tr|A0A498L9Y4|A0A498L9Y4_LABRO Regulating synaptic membrane exocytosis 2-like protein OS=Labeo rohita OX=84645 GN=ROHU_013544 PE=4 SV=1	Labeo rohita
A0A498L9Y5	RXN05171.1	COX assembly mitochondrial protein	C	canonical	1	0	20	0	4								A0A498L9Y5	330	1				tr|A0A498L9Y5|A0A498L9Y5_LABRO COX assembly mitochondrial protein OS=Labeo rohita OX=84645 GN=ROHU_012728 PE=3 SV=1	Labeo rohita
A0A498L9Y6	RXN05019.1	Tetratricopeptide repeat 9A-like protein	C	indistinguishable representative	0.999	0	4	0	2								A0A498L9Y6	331	2				tr|A0A498L9Y6|A0A498L9Y6_LABRO Tetratricopeptide repeat 9A-like protein OS=Labeo rohita OX=84645 GN=ROHU_033622 PE=4 SV=1	Labeo rohita
A0A498L9Z2	RXN05181.1	Cytosolic non-specific dipeptidase-like protein	C	canonical	1	0	270	0	28								A0A498L9Z2	332	5				tr|A0A498L9Z2|A0A498L9Z2_LABRO Cytosolic non-specific dipeptidase-like protein OS=Labeo rohita OX=84645 GN=ROHU_012738 PE=4 SV=1	Labeo rohita
A0A498N2Z4	RXN26192.1	Dual oxidase maturation factor 1-like protein	C	indistinguishable representative	0.998	0	19	0	2								A0A498L9Z2	332	5				tr|A0A498N2Z4|A0A498N2Z4_LABRO Dual oxidase maturation factor 1-like protein OS=Labeo rohita OX=84645 GN=ROHU_021126 PE=4 SV=1	Labeo rohita
A0A498LA00	RXN25472.1	Microtubule-associated tumor suppressor candidate 2-like isoform X1	C	canonical	0.998	0	7	0	4								A0A498LA00	333	3				tr|A0A498LA00|A0A498LA00_LABRO Microtubule-associated tumor suppressor candidate 2-like isoform X1 OS=Labeo rohita OX=84645 GN=ROHU_005891 PE=4 SV=1	Labeo rohita
A0A498LA01	RXN05039.1	E3 ubiquitin-ligase TRIM9 isoform X1	C	indistinguishable representative	0.978	0	6	0	3								A0A498LA01	334	2				tr|A0A498LA01|A0A498LA01_LABRO E3 ubiquitin-ligase TRIM9 isoform X1 OS=Labeo rohita OX=84645 GN=ROHU_033642 PE=4 SV=1	Labeo rohita
A0A498LA10	RXN03706.1	Na(+) H(+) exchange regulatory cofactor NHE-RF1-like protein	C	canonical	1	0	34	0	10								A0A498LA10	335	1				tr|A0A498LA10|A0A498LA10_LABRO Na(+) H(+) exchange regulatory cofactor NHE-RF1-like protein OS=Labeo rohita OX=84645 GN=ROHU_013292 PE=4 SV=1	Labeo rohita
A0A498LA12	RXN05008.1	Mitogen-activated kinase kinase kinase 4-like isoform X1	C	indistinguishable representative	0.998	0	7	0	5								A0A498LA12	336	2				tr|A0A498LA12|A0A498LA12_LABRO Mitogen-activated kinase kinase kinase 4-like isoform X1 OS=Labeo rohita OX=84645 GN=ROHU_033611 PE=4 SV=1	Labeo rohita
A0A498L6I2	RXN02436.1	Glia maturation factor gamma-like protein	C	canonical	1	0	37	0	6								A0A498LA25	337	5				tr|A0A498L6I2|A0A498L6I2_LABRO Glia maturation factor gamma-like protein OS=Labeo rohita OX=84645 GN=ROHU_027337 PE=4 SV=1	Labeo rohita
A0A498LA25	RXN05028.1	Glia maturation factor	C	canonical	1	0	336	0	13								A0A498LA25	337	5				tr|A0A498LA25|A0A498LA25_LABRO Glia maturation factor OS=Labeo rohita OX=84645 GN=ROHU_033631 PE=3 SV=1	Labeo rohita
A0A498LAS0	RXN02435.1	Glia maturation factor gamma	C	marginally distinguished	1	0	13	0	4								A0A498LA25	337	5				tr|A0A498LAS0|A0A498LAS0_LABRO Glia maturation factor gamma OS=Labeo rohita OX=84645 GN=ROHU_035001 PE=4 SV=1	Labeo rohita
A0A498LS60	RXN10532.1	Glia maturation factor beta	C	representative	1	0	254	0	10								A0A498LA25	337	5				tr|A0A498LS60|A0A498LS60_LABRO Glia maturation factor beta OS=Labeo rohita OX=84645 GN=ROHU_030602 PE=4 SV=1	Labeo rohita
A0A498LA27		Uncharacterized protein	C	weak	0.99	0	1	0	1								A0A498LA27	338	1				tr|A0A498LA27|A0A498LA27_LABRO Uncharacterized protein OS=Labeo rohita OX=84645 GN=ROHU_015966 PE=4 SV=1	Labeo rohita
A0A498LA32	RXN05190.1	Persulfide dioxygenase mitochondrial	C	canonical	1	0	454	0	24								A0A498LA32	339	1				tr|A0A498LA32|A0A498LA32_LABRO Persulfide dioxygenase mitochondrial OS=Labeo rohita OX=84645 GN=ROHU_012747 PE=4 SV=1	Labeo rohita
A0A498LA40	RXN02707.1	NSFL1 cofactor p47-like protein	C	canonical	1	0	646	0	34								A0A498LA40	340	1				tr|A0A498LA40|A0A498LA40_LABRO NSFL1 cofactor p47-like protein OS=Labeo rohita OX=84645 GN=ROHU_022948 PE=4 SV=1	Labeo rohita
A0A498LA44	RXN04253.1	Protein FAM184A isoform X1	C	weak	0.989	0	1	0	1								A0A498LA44	341	1				tr|A0A498LA44|A0A498LA44_LABRO Protein FAM184A isoform X1 OS=Labeo rohita OX=84645 GN=ROHU_013046 PE=4 SV=1	Labeo rohita
A0A498LA46	RXN03746.1	Transmembrane 9 superfamily member	C	indistinguishable representative	0.999	0	128	0	17								A0A498LA46	342	2				tr|A0A498LA46|A0A498LA46_LABRO Transmembrane 9 superfamily member OS=Labeo rohita OX=84645 GN=ROHU_013196 PE=3 SV=1	Labeo rohita
A0A498LA47	RXN05048.1	Ninein-like isoform X2	C	weak	0.719	0	1	0	1								A0A498LA47	343	2				tr|A0A498LA47|A0A498LA47_LABRO Ninein-like isoform X2 OS=Labeo rohita OX=84645 GN=ROHU_035658 PE=4 SV=1	Labeo rohita
A0A498LA56	RXN05058.1	DENN domain-containing 4B	C	indistinguishable representative	0.998	0	3	0	3								A0A498LA56	344	2				tr|A0A498LA56|A0A498LA56_LABRO DENN domain-containing 4B OS=Labeo rohita OX=84645 GN=ROHU_033607 PE=4 SV=1	Labeo rohita
A0A498LA62	RXN24700.1	SRC kinase signaling inhibitor 1-like protein	C	canonical	0.999	0	2	0	2								A0A498LA62	345	1				tr|A0A498LA62|A0A498LA62_LABRO SRC kinase signaling inhibitor 1-like protein OS=Labeo rohita OX=84645 GN=ROHU_035846 PE=4 SV=1	Labeo rohita
A0A498LA69	RXN05122.1	CD81 antigen	C	representative	0.999	0	197	0	6								A0A498LA69	346	1				tr|A0A498LA69|A0A498LA69_LABRO CD81 antigen OS=Labeo rohita OX=84645 GN=ROHU_012765 PE=3 SV=1	Labeo rohita
A0A498LA85	RXN06034.1	CD59 glyco-like protein	C	canonical	1	0	12	0	4								A0A498LA85	347	1				tr|A0A498LA85|A0A498LA85_LABRO CD59 glyco-like protein OS=Labeo rohita OX=84645 GN=ROHU_033087 PE=4 SV=1	Labeo rohita
A0A498LA91	RXN03796.1	Rhodopsin	C	canonical	0.999	0	3	0	2								A0A498LA91	348	1				tr|A0A498LA91|A0A498LA91_LABRO Rhodopsin OS=Labeo rohita OX=84645 GN=ROHU_013246 PE=3 SV=1	Labeo rohita
A0A498LAA2		Ammonium transporter Rh type C-like protein	C	indistinguishable representative	0.998	0	2	0	2								A0A498LAA2	349	2				tr|A0A498LAA2|A0A498LAA2_LABRO Ammonium transporter Rh type C-like protein OS=Labeo rohita OX=84645 GN=ROHU_035101 PE=3 SV=1	Labeo rohita
A0A498LAB0	RXN02275.1	CYR61-like protein	C	canonical	1	0	8	0	3								A0A498LAB0	350	1				tr|A0A498LAB0|A0A498LAB0_LABRO CYR61-like protein OS=Labeo rohita OX=84645 GN=ROHU_013814 PE=4 SV=1	Labeo rohita
A0A498LAB9	RXN05281.1	Peptidyl-prolyl cis-trans isomerase (PPIase) (EC 5.2.1.8)	C	canonical	1	0	2151	0	51								A0A498LAB9	351	1				tr|A0A498LAB9|A0A498LAB9_LABRO Peptidyl-prolyl cis-trans isomerase OS=Labeo rohita OX=84645 GN=ROHU_033511 PE=3 SV=1	Labeo rohita
A0A498LAC0	RXN05182.1	Cytosolic non-specific dipeptidase-like protein	C	canonical	0.999	0	87	0	6								A0A498LAC0	352	1				tr|A0A498LAC0|A0A498LAC0_LABRO Cytosolic non-specific dipeptidase-like protein OS=Labeo rohita OX=84645 GN=ROHU_012739 PE=4 SV=1	Labeo rohita
A0A498LAC3	RXN23456.1	WD repeat-containing 44-like isoform X1	C	canonical	0.999	0	75	0	17								A0A498LAC3	353	1				tr|A0A498LAC3|A0A498LAC3_LABRO WD repeat-containing 44-like isoform X1 OS=Labeo rohita OX=84645 GN=ROHU_022862 PE=4 SV=1	Labeo rohita
A0A498LAD5	RXN02817.1	DPCD protein	C	representative	0.999	0	15	0	3								A0A498LAD5	354	1				tr|A0A498LAD5|A0A498LAD5_LABRO DPCD protein OS=Labeo rohita OX=84645 GN=ROHU_013680 PE=4 SV=1	Labeo rohita
A0A498LAE0	RXN05280.1	DEP domain-containing 7-like protein	C	canonical	0.998	0	4	0	3								A0A498LAE0	355	1				tr|A0A498LAE0|A0A498LAE0_LABRO DEP domain-containing 7-like protein OS=Labeo rohita OX=84645 GN=ROHU_033510 PE=4 SV=1	Labeo rohita
A0A498LAE1	RXN05301.1	Calmodulin-regulated spectrin-associated 2-like protein	C	weak	0.989	0	2	0	1								A0A498LAE1	356	2				tr|A0A498LAE1|A0A498LAE1_LABRO Calmodulin-regulated spectrin-associated 2-like protein OS=Labeo rohita OX=84645 GN=ROHU_012710 PE=3 SV=1	Labeo rohita
A0A498LAE4	RXN02827.1	Methionine aminopeptidase mitochondrial	C	representative	0.988	0	3	0	2								A0A498LAE4	357	1				tr|A0A498LAE4|A0A498LAE4_LABRO Methionine aminopeptidase mitochondrial OS=Labeo rohita OX=84645 GN=ROHU_013690 PE=4 SV=1	Labeo rohita
A0A498LAE8	RXN04333.1	Piezo-type mechanosensitive ion channel component	C	indistinguishable representative	0.998	0	77	0	11								A0A498LAE8	358	2				tr|A0A498LAE8|A0A498LAE8_LABRO Piezo-type mechanosensitive ion channel component OS=Labeo rohita OX=84645 GN=ROHU_034044 PE=3 SV=1	Labeo rohita
A0A498L8Z9	RXN04861.1	Serine/threonine-protein phosphatase (EC 3.1.3.16)	C	representative	1	0	1044	0	27								A0A498LAF5	359	16				tr|A0A498L8Z9|A0A498L8Z9_LABRO Serine/threonine-protein phosphatase OS=Labeo rohita OX=84645 GN=ROHU_012867 PE=3 SV=1	Labeo rohita
A0A498LAF5	RXN05209.1	Unconventional myosin-Ic isoform X1	C	canonical	1	0	1856	0	89								A0A498LAF5	359	16				tr|A0A498LAF5|A0A498LAF5_LABRO Unconventional myosin-Ic isoform X1 OS=Labeo rohita OX=84645 GN=ROHU_022870 PE=3 SV=1	Labeo rohita
A0A498LHJ3	RXN07650.1	Unconventional myosin-Ic isoform X1	C	canonical	1	0	429	0	24								A0A498LAF5	359	16				tr|A0A498LHJ3|A0A498LHJ3_LABRO Unconventional myosin-Ic isoform X1 OS=Labeo rohita OX=84645 GN=ROHU_011880 PE=3 SV=1	Labeo rohita
A0A498LHU8	RXN07651.1	Unconventional myosin-Ic-like isoform X1	C	canonical	1	0	313	0	31								A0A498LAF5	359	16				tr|A0A498LHU8|A0A498LHU8_LABRO Unconventional myosin-Ic-like isoform X1 OS=Labeo rohita OX=84645 GN=ROHU_011881 PE=3 SV=1	Labeo rohita
A0A498LRM7	RXN10362.1	Uracil-DNA glycosylase (UDG) (EC 3.2.2.27)	C	canonical	1	0	276	0	25								A0A498LAF5	359	16				tr|A0A498LRM7|A0A498LRM7_LABRO Uracil-DNA glycosylase OS=Labeo rohita OX=84645 GN=UNG PE=3 SV=1	Labeo rohita
A0A498LUI2	RXN11841.1	Serine/threonine-protein phosphatase (EC 3.1.3.16)	C	canonical	1	0	1219	0	35								A0A498LAF5	359	16				tr|A0A498LUI2|A0A498LUI2_LABRO Serine/threonine-protein phosphatase OS=Labeo rohita OX=84645 GN=ROHU_010447 PE=3 SV=1	Labeo rohita
A0A498LXD5	RXN12860.1	Serine/threonine-protein phosphatase (EC 3.1.3.16)	C	representative	1	0	237	0	13								A0A498LAF5	359	16				tr|A0A498LXD5|A0A498LXD5_LABRO Serine/threonine-protein phosphatase OS=Labeo rohita OX=84645 GN=ROHU_005720 PE=3 SV=1	Labeo rohita
A0A498M0I0	RXN12554.1	Serine/threonine-protein phosphatase (EC 3.1.3.16)	C	canonical	1	0	817	0	25								A0A498LAF5	359	16				tr|A0A498M0I0|A0A498M0I0_LABRO Serine/threonine-protein phosphatase OS=Labeo rohita OX=84645 GN=ROHU_029523 PE=3 SV=1	Labeo rohita
A0A498MMR2	RXN21560.1	Cap-specific mRNA (Nucleoside-2-O-)-methyltransferase 2	C	canonical	0.999	0	43	0	27								A0A498LAF5	359	16				tr|A0A498MMR2|A0A498MMR2_LABRO Cap-specific mRNA (Nucleoside-2-O-)-methyltransferase 2 OS=Labeo rohita OX=84645 GN=ROHU_024139 PE=4 SV=1	Labeo rohita
A0A498MSF9	RXN22502.1	Serine/threonine-protein phosphatase (EC 3.1.3.16)	C	marginally distinguished	1	0	244	0	13								A0A498LAF5	359	16				tr|A0A498MSF9|A0A498MSF9_LABRO Serine/threonine-protein phosphatase OS=Labeo rohita OX=84645 GN=ROHU_006709 PE=3 SV=1	Labeo rohita
A0A498NLI1	RXN32830.1	Isoaspartyl peptidase	C	indistinguishable representative	0.998	0	12	0	9								A0A498LAF5	359	16				tr|A0A498NLI1|A0A498NLI1_LABRO Isoaspartyl peptidase OS=Labeo rohita OX=84645 GN=ROHU_015999 PE=4 SV=1	Labeo rohita
A0A498LAG2		E3 ubiquitin-protein ligase Midline-1-like	C	weak	0.99	0	1	0	1								A0A498LAG2	360	2				tr|A0A498LAG2|A0A498LAG2_LABRO E3 ubiquitin-protein ligase Midline-1-like OS=Labeo rohita OX=84645 GN=ROHU_035156 PE=4 SV=1	Labeo rohita
A0A498LAG4	RXN05300.1	WD repeat-containing 47-like protein	C	canonical	0.999	0	74	0	18								A0A498LAG4	361	2				tr|A0A498LAG4|A0A498LAG4_LABRO WD repeat-containing 47-like protein OS=Labeo rohita OX=84645 GN=ROHU_012709 PE=4 SV=1	Labeo rohita
A0A498MFA0	RXN18034.1	WD repeat-containing 47-like protein	C	canonical	0.999	0	17	0	7								A0A498LAG4	361	2				tr|A0A498MFA0|A0A498MFA0_LABRO WD repeat-containing 47-like protein OS=Labeo rohita OX=84645 GN=ROHU_026472 PE=4 SV=1	Labeo rohita
A0A498LAH0	RXN04353.1	Ribonuclease P subunit p14	C	canonical	0.999	0	4	0	4								A0A498LAH0	362	1				tr|A0A498LAH0|A0A498LAH0_LABRO Ribonuclease P subunit p14 OS=Labeo rohita OX=84645 GN=ROHU_012994 PE=4 SV=1	Labeo rohita
A0A498LAH1	RXN03454.1	Golgi SNAP receptor complex member 2-like protein	C	canonical	0.982	0	7	0	2								A0A498LAH1	363	1				tr|A0A498LAH1|A0A498LAH1_LABRO Golgi SNAP receptor complex member 2-like protein OS=Labeo rohita OX=84645 GN=ROHU_013473 PE=4 SV=1	Labeo rohita
A0A498LAH2	RXN03876.1	Dihydrolipoyl dehydrogenase (EC 1.8.1.4)	C	canonical	1	0	2105	0	52								A0A498LAH2	364	2				tr|A0A498LAH2|A0A498LAH2_LABRO Dihydrolipoyl dehydrogenase OS=Labeo rohita OX=84645 GN=ROHU_013171 PE=3 SV=1	Labeo rohita
A0A498M7Q0	RXN15322.1	Dihydrolipoyl dehydrogenase (EC 1.8.1.4)	C	marginally distinguished	1	0	1970	0	45								A0A498LAH2	364	2				tr|A0A498M7Q0|A0A498M7Q0_LABRO Dihydrolipoyl dehydrogenase OS=Labeo rohita OX=84645 GN=ROHU_028143 PE=3 SV=1	Labeo rohita
A0A498LAH9	RXN04363.1	Asporin	C	canonical	1	0	34	0	9								A0A498LAH9	365	1				tr|A0A498LAH9|A0A498LAH9_LABRO Asporin OS=Labeo rohita OX=84645 GN=ROHU_013004 PE=4 SV=1	Labeo rohita
A0A498LAI4	RXN05351.1	Signal peptidase complex catalytic subunit SEC11 (EC 3.4.21.89)	C	canonical	0.999	0	207	0	11								A0A498LAI4	366	1				tr|A0A498LAI4|A0A498LAI4_LABRO Signal peptidase complex catalytic subunit SEC11 OS=Labeo rohita OX=84645 GN=ROHU_033367 PE=3 SV=1	Labeo rohita
A0A498LAI5	RXN02857.1	Neuronal membrane glyco M6-b-like isoform X1	C	canonical	0.999	0	192	0	9								A0A498LAI5	367	3				tr|A0A498LAI5|A0A498LAI5_LABRO Neuronal membrane glyco M6-b-like isoform X1 OS=Labeo rohita OX=84645 GN=ROHU_013720 PE=4 SV=1	Labeo rohita
A0A498P4W0	RXN38574.1	Neuronal membrane glyco M6-b isoform X1	C	representative	0.999	0	169	0	9								A0A498LAI5	367	3				tr|A0A498P4W0|A0A498P4W0_LABRO Neuronal membrane glyco M6-b isoform X1 OS=Labeo rohita OX=84645 GN=ROHU_000997 PE=4 SV=1	Labeo rohita
A0A498LAK0	RXN16129.1	Fascin	C	canonical	1	0	1839	0	71								A0A498LAK0	368	5				tr|A0A498LAK0|A0A498LAK0_LABRO Fascin OS=Labeo rohita OX=84645 GN=ROHU_013513 PE=3 SV=1	Labeo rohita
A0A498MVZ0	RXN10138.1	Fascin	C	canonical	0.999	0	11	0	4								A0A498LAK0	368	5				tr|A0A498MVZ0|A0A498MVZ0_LABRO Fascin OS=Labeo rohita OX=84645 GN=ROHU_022418 PE=3 SV=1	Labeo rohita
A0A498N9D3	RXN29581.1	Fascin	C	canonical	0.999	0	179	0	9								A0A498LAK0	368	5				tr|A0A498N9D3|A0A498N9D3_LABRO Fascin OS=Labeo rohita OX=84645 GN=ROHU_018311 PE=3 SV=1	Labeo rohita
A0A498NBJ0	RXN30541.1	Fascin-like protein	C	canonical	1	0	672	0	39								A0A498LAK0	368	5				tr|A0A498NBJ0|A0A498NBJ0_LABRO Fascin-like protein OS=Labeo rohita OX=84645 GN=ROHU_017700 PE=4 SV=1	Labeo rohita
A0A498NBJ3	RXN30540.1	Fascin	C	canonical	1	0	440	0	16								A0A498LAK0	368	5				tr|A0A498NBJ3|A0A498NBJ3_LABRO Fascin OS=Labeo rohita OX=84645 GN=ROHU_017699 PE=4 SV=1	Labeo rohita
A0A498LAK7	RXN03504.1	Phosphatase 1 regulatory subunit 21	C	weak	0.998	0	1	0	1								A0A498LAK7	369	1				tr|A0A498LAK7|A0A498LAK7_LABRO Phosphatase 1 regulatory subunit 21 OS=Labeo rohita OX=84645 GN=ROHU_035797 PE=4 SV=1	Labeo rohita
A0A498LAL1		Retinol dehydrogenase 8-like protein	C	canonical	0.999	0	4	0	4								A0A498LAL1	370	1				tr|A0A498LAL1|A0A498LAL1_LABRO Retinol dehydrogenase 8-like protein OS=Labeo rohita OX=84645 GN=ROHU_020060 PE=3 SV=1	Labeo rohita
A0A498LAL7	RXN05289.1	Cellular retinoic acid-binding 1	C	canonical	1	0	609	0	31								A0A498LAL7	371	3				tr|A0A498LAL7|A0A498LAL7_LABRO Cellular retinoic acid-binding 1 OS=Labeo rohita OX=84645 GN=ROHU_033519 PE=3 SV=1	Labeo rohita
A0A498MD06	RXN17174.1	Cellular retinoic acid-binding 1	C	canonical	1	0	346	0	24								A0A498LAL7	371	3				tr|A0A498MD06|A0A498MD06_LABRO Cellular retinoic acid-binding 1 OS=Labeo rohita OX=84645 GN=ROHU_027051 PE=3 SV=1	Labeo rohita
A0A498MXW2	RXN28189.1	Cellular retinoic acid-binding 2-like protein	C	canonical	1	0	135	0	10								A0A498LAL7	371	3				tr|A0A498MXW2|A0A498MXW2_LABRO Cellular retinoic acid-binding 2-like protein OS=Labeo rohita OX=84645 GN=ROHU_019515 PE=4 SV=1	Labeo rohita
A0A498LAL8	RXN02385.1	Nucleolar 9	C	canonical	0.996	0	2	0	2								A0A498LAL8	372	1				tr|A0A498LAL8|A0A498LAL8_LABRO Nucleolar 9 OS=Labeo rohita OX=84645 GN=ROHU_035035 PE=4 SV=1	Labeo rohita
A0A498LAM1	RXN05272.1	Cytochrome c oxidase assembly factor 1-like protein	C	weak	0.98	0	3	0	1								A0A498LAM1	373	1				tr|A0A498LAM1|A0A498LAM1_LABRO Cytochrome c oxidase assembly factor 1-like protein OS=Labeo rohita OX=84645 GN=ROHU_021618 PE=4 SV=1	Labeo rohita
A0A498LAM5	RXN05381.1	Elongator complex 2 isoform X1	C	representative	0.998	0	5	0	4								A0A498LAM5	374	2				tr|A0A498LAM5|A0A498LAM5_LABRO Elongator complex 2 isoform X1 OS=Labeo rohita OX=84645 GN=ROHU_033397 PE=4 SV=1	Labeo rohita
A0A498LAM7	RXN05299.1	WD repeat-containing 47-like protein	C	canonical	1	0	100	0	14								A0A498LAM7	375	1				tr|A0A498LAM7|A0A498LAM7_LABRO WD repeat-containing 47-like protein OS=Labeo rohita OX=84645 GN=ROHU_012708 PE=4 SV=1	Labeo rohita
A0A498LAN3	RXN05370.1	S5A_REDUCTASE domain-containing protein	C	canonical	1	0	41	0	4								A0A498LAN3	376	1				tr|A0A498LAN3|A0A498LAN3_LABRO S5A_REDUCTASE domain-containing protein OS=Labeo rohita OX=84645 GN=ROHU_033386 PE=4 SV=1	Labeo rohita
A0A498LAN4	RXN26085.1	Microtubule-actin cross-linking factor 1 isoform X1	C	canonical	0.999	0	259	0	62								A0A498LAN4	377	18				tr|A0A498LAN4|A0A498LAN4_LABRO Microtubule-actin cross-linking factor 1 isoform X1 OS=Labeo rohita OX=84645 GN=ROHU_021019 PE=4 SV=1	Labeo rohita
A0A498LFY9	RXN05906.1	Carboxypeptidase Q	C	canonical	1	0	74	0	15								A0A498LAN4	377	18				tr|A0A498LFY9|A0A498LFY9_LABRO Carboxypeptidase Q OS=Labeo rohita OX=84645 GN=ROHU_033119 PE=4 SV=1	Labeo rohita
A0A498MBY9		Dedicator of cytokinesis 4-like protein	C	indistinguishable representative	0.996	0	3	0	2								A0A498LAN4	377	18				tr|A0A498MBY9|A0A498MBY9_LABRO Dedicator of cytokinesis 4-like protein OS=Labeo rohita OX=84645 GN=ROHU_008265 PE=3 SV=1	Labeo rohita
A0A498MFT2	RXN20079.1	Dedicator of cytokinesis 3 isoform X5	C	canonical	0.999	0	55	0	15								A0A498LAN4	377	18				tr|A0A498MFT2|A0A498MFT2_LABRO Dedicator of cytokinesis 3 isoform X5 OS=Labeo rohita OX=84645 GN=ROHU_007138 PE=3 SV=1	Labeo rohita
A0A498MJH4	RXN19006.1	Dedicator of cytokinesis 1 isoform X1	C	canonical	0.999	0	31	0	9								A0A498LAN4	377	18				tr|A0A498MJH4|A0A498MJH4_LABRO Dedicator of cytokinesis 1 isoform X1 OS=Labeo rohita OX=84645 GN=ROHU_007487 PE=3 SV=1	Labeo rohita
A0A498N1S5	RXN25694.1	Dedicator of cytokinesis 4-like protein	C	canonical	0.999	0	11	0	7								A0A498LAN4	377	18				tr|A0A498N1S5|A0A498N1S5_LABRO Dedicator of cytokinesis 4-like protein OS=Labeo rohita OX=84645 GN=ROHU_021350 PE=3 SV=1	Labeo rohita
A0A498N213	RXN28359.1	Dedicator of cytokinesis 2	C	canonical	1	0	96	0	26								A0A498LAN4	377	18				tr|A0A498N213|A0A498N213_LABRO Dedicator of cytokinesis 2 OS=Labeo rohita OX=84645 GN=ROHU_019302 PE=3 SV=1	Labeo rohita
A0A498NMW9	RXN33360.1	Cohesin subunit SA-1 isoform X1	C	marginally distinguished	0.999	0	12	0	7								A0A498LAN4	377	18				tr|A0A498NMW9|A0A498NMW9_LABRO Cohesin subunit SA-1 isoform X1 OS=Labeo rohita OX=84645 GN=ROHU_004314 PE=4 SV=1	Labeo rohita
A0A498NTM3	RXN35251.1	Cohesin subunit SA-2 isoform X1	C	canonical	0.999	0	17	0	9								A0A498LAN4	377	18				tr|A0A498NTM3|A0A498NTM3_LABRO Cohesin subunit SA-2 isoform X1 OS=Labeo rohita OX=84645 GN=ROHU_014490 PE=4 SV=1	Labeo rohita
A0A498LAN5	RXN31261.1	WD repeat domain phosphoinositide-interacting 3	C	canonical	0.998	0	3	0	2								A0A498LAN5	378	1				tr|A0A498LAN5|A0A498LAN5_LABRO WD repeat domain phosphoinositide-interacting 3 OS=Labeo rohita OX=84645 GN=ROHU_017107 PE=4 SV=1	Labeo rohita
A0A498LAP0	RXN05380.1	Gamma-aminobutyric acid type B receptor subunit 2	C	indistinguishable representative	0.998	0	3	0	2								A0A498LAP0	379	2				tr|A0A498LAP0|A0A498LAP0_LABRO Gamma-aminobutyric acid type B receptor subunit 2 OS=Labeo rohita OX=84645 GN=ROHU_033396 PE=4 SV=1	Labeo rohita
A0A498LAP4	RXN05292.1	E3 ubiquitin-ligase HECW1-like protein	C	representative	0.998	0	4	0	3								A0A498LAP4	380	3				tr|A0A498LAP4|A0A498LAP4_LABRO E3 ubiquitin-ligase HECW1-like protein OS=Labeo rohita OX=84645 GN=ROHU_035626 PE=4 SV=1	Labeo rohita
A0A498LAR2		Inhibitor of growth protein	C	weak	0.799	0	1	0	1								A0A498LAR2	381	1				tr|A0A498LAR2|A0A498LAR2_LABRO Inhibitor of growth protein OS=Labeo rohita OX=84645 GN=ROHU_012934 PE=3 SV=1	Labeo rohita
A0A498LAS3	RXN03574.1	ATP-dependent RNA helicase TDRD12	C	canonical	0.999	0	16	0	7								A0A498LAS3	382	1				tr|A0A498LAS3|A0A498LAS3_LABRO ATP-dependent RNA helicase TDRD12 OS=Labeo rohita OX=84645 GN=ROHU_035790 PE=4 SV=1	Labeo rohita
A0A498LAS9		Tetraspanin	C	weak	0.882	0	1	0	1								A0A498LAS9	383	2				tr|A0A498LAS9|A0A498LAS9_LABRO Tetraspanin OS=Labeo rohita OX=84645 GN=ROHU_033365 PE=3 SV=1	Labeo rohita
A0A498LAU0		Mitogen-activated protein kinase kinase kinase kinase (EC 2.7.11.1)	C	weak	0.98	0	1	0	1								A0A498LAU0	384	1				tr|A0A498LAU0|A0A498LAU0_LABRO Mitogen-activated protein kinase kinase kinase kinase OS=Labeo rohita OX=84645 GN=ROHU_035874 PE=3 SV=1	Labeo rohita
A0A498LAU2		Matrix metallo ase-14-like protein	C	weak	0.977	0	1	0	1								A0A498LAU2	385	2				tr|A0A498LAU2|A0A498LAU2_LABRO Matrix metallo ase-14-like protein OS=Labeo rohita OX=84645 GN=ROHU_035750 PE=3 SV=1	Labeo rohita
A0A498LAU5		Cingulin-like isoform X1	C	representative	0.985	0	5	0	3								A0A498LAU5	386	3				tr|A0A498LAU5|A0A498LAU5_LABRO Cingulin-like isoform X1 OS=Labeo rohita OX=84645 GN=ROHU_033467 PE=4 SV=1	Labeo rohita
A0A498LAU9	RXN05369.1	Bridging integrator 2-like protein	C	canonical	1	0	175	0	21								A0A498LAU9	387	2				tr|A0A498LAU9|A0A498LAU9_LABRO Bridging integrator 2-like protein OS=Labeo rohita OX=84645 GN=ROHU_033385 PE=4 SV=1	Labeo rohita
A0A498LHR8	RXN07730.1	Bridging integrator 2-like protein	C	canonical	0.999	0	41	0	12								A0A498LAU9	387	2				tr|A0A498LHR8|A0A498LHR8_LABRO Bridging integrator 2-like protein OS=Labeo rohita OX=84645 GN=ROHU_011702 PE=4 SV=1	Labeo rohita
A0A498LAV2	RXN05352.1	Sodium/nucleoside cotransporter	C	weak	0.961	0	1	0	1								A0A498LAV2	388	1				tr|A0A498LAV2|A0A498LAV2_LABRO Sodium/nucleoside cotransporter OS=Labeo rohita OX=84645 GN=ROHU_033368 PE=3 SV=1	Labeo rohita
A0A498LAW8	RXN05471.1	Pleckstrin-like protein	C	canonical	0.999	0	16	0	9								A0A498LAW8	389	1				tr|A0A498LAW8|A0A498LAW8_LABRO Pleckstrin-like protein OS=Labeo rohita OX=84645 GN=ROHU_012703 PE=4 SV=1	Labeo rohita
A0A498LAX2	RXN03624.1	40S ribosomal S5	C	canonical	1	0	1399	0	33								A0A498LAX2	390	1				tr|A0A498LAX2|A0A498LAX2_LABRO 40S ribosomal S5 OS=Labeo rohita OX=84645 GN=ROHU_008325 PE=3 SV=1	Labeo rohita
A0A498LAX4	RXN05372.1	Citrate synthase	C	canonical	1	0	2479	0	60								A0A498LAX4	391	1				tr|A0A498LAX4|A0A498LAX4_LABRO Citrate synthase OS=Labeo rohita OX=84645 GN=ROHU_033388 PE=3 SV=1	Labeo rohita
A0A498LAY2	RXN05409.1	Galactose-1-phosphate uridylyltransferase (EC 2.7.7.12)	C	canonical	0.999	0	54	0	7								A0A498LAY2	392	1				tr|A0A498LAY2|A0A498LAY2_LABRO Galactose-1-phosphate uridylyltransferase OS=Labeo rohita OX=84645 GN=ROHU_017633 PE=3 SV=1	Labeo rohita
A0A498LAY4	RXN05460.1	SKI family transcriptional corepressor 2	C	representative	0.999	0	19	0	3								A0A498LAY4	393	2				tr|A0A498LAY4|A0A498LAY4_LABRO SKI family transcriptional corepressor 2 OS=Labeo rohita OX=84645 GN=ROHU_035613 PE=4 SV=1	Labeo rohita
A0A498NDU1	RXN30584.1	Haloacid dehalogenase-like hydrolase domain-containing 2	C	marginally distinguished	0.999	0	13	0	3								A0A498LAY4	393	2				tr|A0A498NDU1|A0A498NDU1_LABRO Haloacid dehalogenase-like hydrolase domain-containing 2 OS=Labeo rohita OX=84645 GN=ROHU_017631 PE=4 SV=1	Labeo rohita
A0A498LAY5	RXN26094.1	Simiate	C	canonical	0.999	0	19	0	7								A0A498LAY5	394	1				tr|A0A498LAY5|A0A498LAY5_LABRO Simiate OS=Labeo rohita OX=84645 GN=ROHU_021028 PE=4 SV=1	Labeo rohita
A0A498LAZ1	RXN05419.1	Interferon-inducible GTPase 5-like protein	C	canonical	1	0	112	0	15								A0A498LAZ1	395	7				tr|A0A498LAZ1|A0A498LAZ1_LABRO Interferon-inducible GTPase 5-like protein OS=Labeo rohita OX=84645 GN=ROHU_019140 PE=4 SV=1	Labeo rohita
A0A498LDC2	RXN04514.1	Interferon-inducible GTPase 5-like protein	C	indistinguishable representative	1	0	102	0	12								A0A498LAZ1	395	7				tr|A0A498LDC2|A0A498LDC2_LABRO Interferon-inducible GTPase 5-like protein OS=Labeo rohita OX=84645 GN=ROHU_033993 PE=4 SV=1	Labeo rohita
A0A498LIC7		Interferon-inducible GTPase 5-like protein	C	marginally distinguished	1	0	82	0	5								A0A498LAZ1	395	7				tr|A0A498LIC7|A0A498LIC7_LABRO Interferon-inducible GTPase 5-like protein OS=Labeo rohita OX=84645 GN=ROHU_019139 PE=4 SV=1	Labeo rohita
A0A498NC56	RXN28536.1	Interferon-inducible GTPase 5-like protein	C	marginally distinguished	1	0	44	0	3								A0A498LAZ1	395	7				tr|A0A498NC56|A0A498NC56_LABRO Interferon-inducible GTPase 5-like protein OS=Labeo rohita OX=84645 GN=ROHU_019137 PE=4 SV=1	Labeo rohita
A0A498NE86	RXN28535.1	Interferon-inducible GTPase 5-like protein	C	canonical	1	0	97	0	9								A0A498LAZ1	395	7				tr|A0A498NE86|A0A498NE86_LABRO Interferon-inducible GTPase 5-like protein OS=Labeo rohita OX=84645 GN=ROHU_019136 PE=4 SV=1	Labeo rohita
A0A498LAZ5	RXN05348.1	Proline-serine-threonine phosphatase-interacting 1-like protein	C	canonical	0.998	0	5	0	4								A0A498LAZ5	396	1				tr|A0A498LAZ5|A0A498LAZ5_LABRO Proline-serine-threonine phosphatase-interacting 1-like protein OS=Labeo rohita OX=84645 GN=ROHU_033364 PE=4 SV=1	Labeo rohita
A0A498LAZ6		Small acidic	C	canonical	0.999	0	2	0	2								A0A498LAZ6	397	1				tr|A0A498LAZ6|A0A498LAZ6_LABRO Small acidic OS=Labeo rohita OX=84645 GN=ROHU_012702 PE=4 SV=1	Labeo rohita
A0A498LAZ9		Neural Wiskott-Aldrich syndrome-like protein	C	indistinguishable representative	0.998	0	2	0	2								A0A498LAZ9	398	2				tr|A0A498LAZ9|A0A498LAZ9_LABRO Neural Wiskott-Aldrich syndrome-like protein OS=Labeo rohita OX=84645 GN=ROHU_035605 PE=4 SV=1	Labeo rohita
A0A498LB02	RXN03654.1	N_BRCA1_IG domain-containing protein	C	canonical	0.999	0	3	0	2								A0A498LB02	399	1				tr|A0A498LB02|A0A498LB02_LABRO N_BRCA1_IG domain-containing protein OS=Labeo rohita OX=84645 GN=ROHU_034364 PE=4 SV=1	Labeo rohita
A0A498LB05	RXN05358.1	Isocitrate dehydrogenase [NADP] mitochondrial	C	canonical	1	0	6213	0	102								A0A498LB05	400	3				tr|A0A498LB05|A0A498LB05_LABRO Isocitrate dehydrogenase [NADP] mitochondrial OS=Labeo rohita OX=84645 GN=ROHU_006959 PE=4 SV=1	Labeo rohita
A0A498N4I9	RXN29028.1	Pleckstrin homology domain-containing family M member 3-like isoform X1	C	canonical	1	0	2714	0	78								A0A498LB05	400	3				tr|A0A498N4I9|A0A498N4I9_LABRO Pleckstrin homology domain-containing family M member 3-like isoform X1 OS=Labeo rohita OX=84645 GN=ROHU_018757 PE=4 SV=1	Labeo rohita
A0A498NIV3		FRAS1-related extracellular matrix 1	C	marginally distinguished	0.999	0	64	0	2								A0A498LB05	400	3				tr|A0A498NIV3|A0A498NIV3_LABRO FRAS1-related extracellular matrix 1 OS=Labeo rohita OX=84645 GN=ROHU_016718 PE=4 SV=1	Labeo rohita
A0A498LB07	RXN05439.1	Tripartite motif-containing 46 isoform X1	C	weak	0.99	0	4	0	1								A0A498LB07	401	1				tr|A0A498LB07|A0A498LB07_LABRO Tripartite motif-containing 46 isoform X1 OS=Labeo rohita OX=84645 GN=ROHU_030848 PE=4 SV=1	Labeo rohita
A0A498LB15	RXN05521.1	NAD-dependent protein deacylase sirtuin-5, mitochondrial (EC 3.5.1.-) (Regulatory protein SIR2 homolog 5) (SIR2-like protein 5)	C	canonical	1	0	115	0	16								A0A498LB15	402	3				tr|A0A498LB15|A0A498LB15_LABRO NAD-dependent protein deacylase sirtuin-5, mitochondrial OS=Labeo rohita OX=84645 GN=SIRT5 PE=3 SV=1	Labeo rohita
A0A498LGI9	RXN04525.1	NAD-dependent protein deacylase sirtuin-5, mitochondrial (EC 3.5.1.-) (Regulatory protein SIR2 homolog 5) (SIR2-like protein 5)	C	canonical	1	0	247	0	14								A0A498LB15	402	3				tr|A0A498LGI9|A0A498LGI9_LABRO NAD-dependent protein deacylase sirtuin-5, mitochondrial OS=Labeo rohita OX=84645 GN=SIRT5 PE=3 SV=1	Labeo rohita
A0A498LB19	RXN03684.1	Phosphorylated CTD-interacting factor 1-like protein	C	canonical	1	0	34	0	14								A0A498LB19	403	1				tr|A0A498LB19|A0A498LB19_LABRO Phosphorylated CTD-interacting factor 1-like protein OS=Labeo rohita OX=84645 GN=ROHU_028007 PE=4 SV=1	Labeo rohita
A0A498LB21	RXN05459.1	Microtubule-actin cross-linking factor 1-like protein	C	representative	0.999	0	15	0	3								A0A498LB21	404	1				tr|A0A498LB21|A0A498LB21_LABRO Microtubule-actin cross-linking factor 1-like protein OS=Labeo rohita OX=84645 GN=ROHU_035612 PE=4 SV=1	Labeo rohita
A0A498LB24	RXN05432.1	Hormone-sensitive lipase-like protein	C	representative	0.999	0	18	0	7								A0A498LB24	405	2				tr|A0A498LB24|A0A498LB24_LABRO Hormone-sensitive lipase-like protein OS=Labeo rohita OX=84645 GN=ROHU_033448 PE=4 SV=1	Labeo rohita
A0A498LB35		Histone-lysine N-methyltransferase EZH2 isoform X2	C	weak	0.971	0	1	0	1								A0A498LB35	406	1				tr|A0A498LB35|A0A498LB35_LABRO Histone-lysine N-methyltransferase EZH2 isoform X2 OS=Labeo rohita OX=84645 GN=ROHU_013101 PE=4 SV=1	Labeo rohita
A0A498LB40	RXN05489.1	Myosin-9-like isoform X1	C	weak	0.988	0	39	0	1								A0A498LB40	407	1				tr|A0A498LB40|A0A498LB40_LABRO Myosin-9-like isoform X1 OS=Labeo rohita OX=84645 GN=ROHU_033348 PE=4 SV=1	Labeo rohita
A0A498LB48	RXN33182.1	Bryoporin-like protein	C	canonical	1	0	89	0	12								A0A498LB48	408	1				tr|A0A498LB48|A0A498LB48_LABRO Bryoporin-like protein OS=Labeo rohita OX=84645 GN=ROHU_015781 PE=4 SV=1	Labeo rohita
A0A498LB59	RXN04543.1	Target of rapamycin complex subunit lst8	C	canonical	0.999	0	16	0	8								A0A498LB59	409	1				tr|A0A498LB59|A0A498LB59_LABRO Target of rapamycin complex subunit lst8 OS=Labeo rohita OX=84645 GN=ROHU_033897 PE=4 SV=1	Labeo rohita
A0A498LB62	RXN03744.1	Sideroflexin-4	C	indistinguishable representative	0.999	0	17	0	4								A0A498LB62	410	2				tr|A0A498LB62|A0A498LB62_LABRO Sideroflexin-4 OS=Labeo rohita OX=84645 GN=ROHU_013194 PE=4 SV=1	Labeo rohita
A0A498LB63		Glycine-rich cell wall structural-like protein	C	weak	0.87	0	2	0	1								A0A498LB63	411	2				tr|A0A498LB63|A0A498LB63_LABRO Glycine-rich cell wall structural-like protein OS=Labeo rohita OX=84645 GN=ROHU_034925 PE=4 SV=1	Labeo rohita
A0A498LB65		SAFB-like transcription modulator isoform X3	C	weak	0.825	0	1	0	1								A0A498LB65	412	1				tr|A0A498LB65|A0A498LB65_LABRO SAFB-like transcription modulator isoform X3 OS=Labeo rohita OX=84645 GN=ROHU_034147 PE=4 SV=1	Labeo rohita
A0A498LB67	RXN04553.1	Tectonin beta-propeller repeat-containing 1	C	canonical	0.999	0	10	0	9								A0A498LB67	413	1				tr|A0A498LB67|A0A498LB67_LABRO Tectonin beta-propeller repeat-containing 1 OS=Labeo rohita OX=84645 GN=ROHU_033907 PE=4 SV=1	Labeo rohita
A0A498LB77		Cysteine and glycine-rich 1	C	indistinguishable representative	1	0	996	0	33								A0A498LB77	414	2				tr|A0A498LB77|A0A498LB77_LABRO Cysteine and glycine-rich 1 OS=Labeo rohita OX=84645 GN=ROHU_033341 PE=4 SV=1	Labeo rohita
A0A498LB78	RXN04156.1	CASC4-like isoform X1	C	representative	0.999	0	19	0	7								A0A498LB78	415	2				tr|A0A498LB78|A0A498LB78_LABRO CASC4-like isoform X1 OS=Labeo rohita OX=84645 GN=ROHU_034157 PE=4 SV=1	Labeo rohita
A0A498LB81	RXN05448.1	Protein S100 (S100 calcium-binding protein)	C	indistinguishable representative	1	0	5	0	3								A0A498LB81	416	2				tr|A0A498LB81|A0A498LB81_LABRO Protein S100 OS=Labeo rohita OX=84645 GN=ROHU_033464 PE=3 SV=1	Labeo rohita
A0A498LB82	RXN05539.1	RNA-binding 38-like protein	C	representative	0.999	0	33	0	7								A0A498LB82	417	2				tr|A0A498LB82|A0A498LB82_LABRO RNA-binding 38-like protein OS=Labeo rohita OX=84645 GN=ROHU_012697 PE=4 SV=1	Labeo rohita
A0A498LB99	RXN03774.1	Translocator	C	representative	1	0	9	0	4								A0A498LB99	418	1				tr|A0A498LB99|A0A498LB99_LABRO Translocator OS=Labeo rohita OX=84645 GN=ROHU_013224 PE=4 SV=1	Labeo rohita
A0A498LBA5	RXN10309.1	SHC-transforming 1 isoform X1	C	weak	0.99	0	1	0	1								A0A498LBA5	419	1				tr|A0A498LBA5|A0A498LBA5_LABRO SHC-transforming 1 isoform X1 OS=Labeo rohita OX=84645 GN=ROHU_035621 PE=4 SV=1	Labeo rohita
A0A498LBA9	RXN29388.1	Sortilin	C	canonical	0.998	0	9	0	2								A0A498LBA9	420	1				tr|A0A498LBA9|A0A498LBA9_LABRO Sortilin OS=Labeo rohita OX=84645 GN=ROHU_018514 PE=4 SV=1	Labeo rohita
A0A498LBB3	RXN05512.1	60S ribosomal L23	C	canonical	1	0	809	0	25								A0A498LBB3	421	1				tr|A0A498LBB3|A0A498LBB3_LABRO 60S ribosomal L23 OS=Labeo rohita OX=84645 GN=ROHU_012670 PE=3 SV=1	Labeo rohita
A0A498LBC3	RXN05589.1	Tryptophan--tRNA cytoplasmic	C	representative	1	0	284	0	26								A0A498LBC3	422	2				tr|A0A498LBC3|A0A498LBC3_LABRO Tryptophan--tRNA cytoplasmic OS=Labeo rohita OX=84645 GN=ROHU_033332 PE=3 SV=1	Labeo rohita
A0A498LBH8	RXN05572.1	Tryptophan--tRNA cytoplasmic	C	marginally distinguished	1	0	302	0	26								A0A498LBC3	422	2				tr|A0A498LBH8|A0A498LBH8_LABRO Tryptophan--tRNA cytoplasmic OS=Labeo rohita OX=84645 GN=ROHU_033315 PE=3 SV=1	Labeo rohita
A0A498LBD1	RXN05570.1	Mitochondrial basic amino acids transporter isoform X1	C	canonical	0.999	0	6	0	5								A0A498LBD1	423	2				tr|A0A498LBD1|A0A498LBD1_LABRO Mitochondrial basic amino acids transporter isoform X1 OS=Labeo rohita OX=84645 GN=ROHU_033313 PE=3 SV=1	Labeo rohita
A0A498NTP5	RXN34914.1	Mitochondrial basic amino acids transporter-like protein	C	canonical	0.996	0	3	0	3								A0A498LBD1	423	2				tr|A0A498NTP5|A0A498NTP5_LABRO Mitochondrial basic amino acids transporter-like protein OS=Labeo rohita OX=84645 GN=ROHU_014557 PE=3 SV=1	Labeo rohita
A0A498LBD4	RXN22363.1	RCC2	C	canonical	1	0	231	0	28								A0A498LBD4	424	1				tr|A0A498LBD4|A0A498LBD4_LABRO RCC2 OS=Labeo rohita OX=84645 GN=ROHU_023492 PE=4 SV=1	Labeo rohita
A0A498LBD7		DENN domain-containing 2D-like protein	C	canonical	0.998	0	2	0	2								A0A498LBD7	425	1				tr|A0A498LBD7|A0A498LBD7_LABRO DENN domain-containing 2D-like protein OS=Labeo rohita OX=84645 GN=ROHU_035588 PE=4 SV=1	Labeo rohita
A0A498LBD9	RXN03814.1	CaM kinase-like vesicle-associated	C	canonical	0.999	0	147	0	22								A0A498LBD9	426	2				tr|A0A498LBD9|A0A498LBD9_LABRO CaM kinase-like vesicle-associated OS=Labeo rohita OX=84645 GN=ROHU_013264 PE=4 SV=1	Labeo rohita
A0A498NRP1	RXN34349.1	CaM kinase-like vesicle-associated	C	canonical	0.999	0	144	0	23								A0A498LBD9	426	2				tr|A0A498NRP1|A0A498NRP1_LABRO CaM kinase-like vesicle-associated OS=Labeo rohita OX=84645 GN=ROHU_036001 PE=4 SV=1	Labeo rohita
A0A498LBE4	RXN05580.1	Serine threonine-phosphatase 2A 56 kDa regulatory subunit gamma isoform isoform X1	C	canonical	0.999	0	3	0	2								A0A498LBE4	427	1				tr|A0A498LBE4|A0A498LBE4_LABRO Serine threonine-phosphatase 2A 56 kDa regulatory subunit gamma isoform isoform X1 OS=Labeo rohita OX=84645 GN=ROHU_033323 PE=4 SV=1	Labeo rohita
A0A498LBE6	RXN05498.1	Synaptotagmin-2-like isoform X1	C	representative	0.999	0	20	0	3								A0A498LBE6	428	1				tr|A0A498LBE6|A0A498LBE6_LABRO Synaptotagmin-2-like isoform X1 OS=Labeo rohita OX=84645 GN=ROHU_035153 PE=4 SV=1	Labeo rohita
A0A498LBE8	RXN03824.1	CCA tRNA nucleotidyltransferase mitochondrial	C	canonical	0.998	0	5	0	4								A0A498LBE8	429	1				tr|A0A498LBE8|A0A498LBE8_LABRO CCA tRNA nucleotidyltransferase mitochondrial OS=Labeo rohita OX=84645 GN=ROHU_013274 PE=3 SV=1	Labeo rohita
A0A498LBF9	RXN02675.1	Biglycan	C	canonical	1	0	1372	0	48								A0A498LBF9	430	1				tr|A0A498LBF9|A0A498LBF9_LABRO Biglycan OS=Labeo rohita OX=84645 GN=ROHU_022977 PE=3 SV=1	Labeo rohita
A0A498LBG1	RXN05671.1	ABHD16A	C	canonical	0.999	0	75	0	14								A0A498LBG1	431	1				tr|A0A498LBG1|A0A498LBG1_LABRO ABHD16A OS=Labeo rohita OX=84645 GN=ROHU_012606 PE=4 SV=1	Labeo rohita
A0A498LBG2	RXN05639.1	Transmembrane protein 263-like	C	weak	0.995	0	2	0	1								A0A498LBG2	432	1				tr|A0A498LBG2|A0A498LBG2_LABRO Transmembrane protein 263-like OS=Labeo rohita OX=84645 GN=ROHU_012636 PE=4 SV=1	Labeo rohita
A0A498LBG9	RXN02685.1	Deoxyribonuclease gamma-like protein	C	indistinguishable representative	0.991	0	3	0	2								A0A498LBG9	433	2				tr|A0A498LBG9|A0A498LBG9_LABRO Deoxyribonuclease gamma-like protein OS=Labeo rohita OX=84645 GN=ROHU_034861 PE=4 SV=1	Labeo rohita
A0A498LBH1		Mediator of DNA damage checkpoint 1	C	weak	0.985	0	1	0	1								A0A498LBH1	434	1				tr|A0A498LBH1|A0A498LBH1_LABRO Mediator of DNA damage checkpoint 1 OS=Labeo rohita OX=84645 GN=ROHU_035581 PE=4 SV=1	Labeo rohita
A0A498LBI0	RXN03864.1	Long-chain-fatty-acid--ligase ACSBG1	C	representative	0.999	0	198	0	31								A0A498LBI0	435	2				tr|A0A498LBI0|A0A498LBI0_LABRO Long-chain-fatty-acid--ligase ACSBG1 OS=Labeo rohita OX=84645 GN=ROHU_034321 PE=4 SV=1	Labeo rohita
A0A498LBI5	RXN05582.1	Cytoplasmic dynein 1 heavy chain 1 isoform X2	C	canonical	1	0	1225	0	63								A0A498LBI5	436	2				tr|A0A498LBI5|A0A498LBI5_LABRO Cytoplasmic dynein 1 heavy chain 1 isoform X2 OS=Labeo rohita OX=84645 GN=ROHU_033325 PE=4 SV=1	Labeo rohita
A0A498N3Z0	RXN26913.1	V-type proton ATPase subunit S1-like protein	C	canonical	0.999	0	47	0	9								A0A498LBI5	436	2				tr|A0A498N3Z0|A0A498N3Z0_LABRO V-type proton ATPase subunit S1-like protein OS=Labeo rohita OX=84645 GN=ROHU_020366 PE=4 SV=1	Labeo rohita
A0A498LBI7	RXN05669.1	Uncharacterized protein	C	canonical	0.999	0	21	0	8								A0A498LBI7	437	1				tr|A0A498LBI7|A0A498LBI7_LABRO Uncharacterized protein OS=Labeo rohita OX=84645 GN=ROHU_012604 PE=4 SV=1	Labeo rohita
A0A498LBJ9	RXN05630.1	Methylosome 50	C	indistinguishable representative	1	0	174	0	23								A0A498LBJ9	438	2				tr|A0A498LBJ9|A0A498LBJ9_LABRO Methylosome 50 OS=Labeo rohita OX=84645 GN=ROHU_012627 PE=4 SV=1	Labeo rohita
A0A498LBK9	RXN26041.1	3-hydroxyacyl-dehydrogenase type-2	C	canonical	1	0	416	0	19								A0A498LBK9	439	1				tr|A0A498LBK9|A0A498LBK9_LABRO 3-hydroxyacyl-dehydrogenase type-2 OS=Labeo rohita OX=84645 GN=ROHU_020975 PE=3 SV=1	Labeo rohita
A0A498LBL0	RXN03197.1	Citrate lyase subunit beta mitochondrial	C	indistinguishable representative	1	0	127	0	13								A0A498LBL0	440	2				tr|A0A498LBL0|A0A498LBL0_LABRO Citrate lyase subunit beta mitochondrial OS=Labeo rohita OX=84645 GN=ROHU_034490 PE=4 SV=1	Labeo rohita
A0A498LBL2		Heme-binding 1-like protein	C	weak	0.831	0	1	0	1								A0A498LBL2	441	2				tr|A0A498LBL2|A0A498LBL2_LABRO Heme-binding 1-like protein OS=Labeo rohita OX=84645 GN=ROHU_033311 PE=4 SV=1	Labeo rohita
A0A498LBM0	RXN03207.1	Apolipo A-I-like protein	C	representative	1	0	331	0	42								A0A498LBM0	442	2				tr|A0A498LBM0|A0A498LBM0_LABRO Apolipo A-I-like protein OS=Labeo rohita OX=84645 GN=ROHU_034500 PE=3 SV=1	Labeo rohita
A0A498LBM3	RXN05711.1	40S ribosomal protein S8	C	canonical	1	0	2006	0	44								A0A498LBM3	443	2				tr|A0A498LBM3|A0A498LBM3_LABRO 40S ribosomal protein S8 OS=Labeo rohita OX=84645 GN=ROHU_033206 PE=3 SV=1	Labeo rohita
A0A498NR65	RXN34560.1	40S ribosomal protein S8	C	canonical	1	0	1287	0	33								A0A498LBM3	443	2				tr|A0A498NR65|A0A498NR65_LABRO 40S ribosomal protein S8 OS=Labeo rohita OX=84645 GN=ROHU_014890 PE=3 SV=1	Labeo rohita
A0A498LBM4	RXN05709.1	E3 ubiquitin-ligase HECTD3	C	canonical	0.999	0	16	0	11								A0A498LBM4	444	1				tr|A0A498LBM4|A0A498LBM4_LABRO E3 ubiquitin-ligase HECTD3 OS=Labeo rohita OX=84645 GN=ROHU_033204 PE=4 SV=1	Labeo rohita
A0A498LBN7	RXN04316.1	Reversion-inducing cysteine-rich with Kazal motifs-like protein	C	weak	0.976	0	1	0	1								A0A498LBN7	445	1				tr|A0A498LBN7|A0A498LBN7_LABRO Reversion-inducing cysteine-rich with Kazal motifs-like protein OS=Labeo rohita OX=84645 GN=ROHU_035719 PE=4 SV=1	Labeo rohita
A0A498LBP1	RXN03227.1	ER membrane complex subunit 3-like protein	C	canonical	1	0	17	0	6								A0A498LBP1	446	1				tr|A0A498LBP1|A0A498LBP1_LABRO ER membrane complex subunit 3-like protein OS=Labeo rohita OX=84645 GN=ROHU_009492 PE=4 SV=1	Labeo rohita
A0A498LBP2	RXN05670.1	Valine--tRNA ligase-like isoform X1	C	canonical	1	0	825	0	71								A0A498LBP2	447	1				tr|A0A498LBP2|A0A498LBP2_LABRO Valine--tRNA ligase-like isoform X1 OS=Labeo rohita OX=84645 GN=ROHU_012605 PE=3 SV=1	Labeo rohita
A0A498LBP3	RXN05729.1	E3 ubiquitin-ligase RNF31	C	canonical	0.999	0	9	0	5								A0A498LBP3	448	1				tr|A0A498LBP3|A0A498LBP3_LABRO E3 ubiquitin-ligase RNF31 OS=Labeo rohita OX=84645 GN=ROHU_033224 PE=4 SV=1	Labeo rohita
A0A498LBP8	RXN03944.1	Adhesion G-coupled receptor L1-like isoform X1	C	representative	0.999	0	18	0	9								A0A498LBP8	449	7				tr|A0A498LBP8|A0A498LBP8_LABRO Adhesion G-coupled receptor L1-like isoform X1 OS=Labeo rohita OX=84645 GN=ROHU_034268 PE=3 SV=1	Labeo rohita
A0A498P146	RXN37768.1	Adhesion G-coupled receptor L3 isoform X6	C	representative	0.999	0	12	0	5								A0A498LBP8	449	7				tr|A0A498P146|A0A498P146_LABRO Adhesion G-coupled receptor L3 isoform X6 OS=Labeo rohita OX=84645 GN=ROHU_013971 PE=4 SV=1	Labeo rohita
A0A498LBQ0		Clustered mitochondria-like protein	C	weak	0.984	0	2	0	1								A0A498LBQ0	450	2				tr|A0A498LBQ0|A0A498LBQ0_LABRO Clustered mitochondria-like protein OS=Labeo rohita OX=84645 GN=ROHU_035812 PE=4 SV=1	Labeo rohita
A0A498LBR0	RXN11171.1	Sex hormone-binding globulin-like protein	C	canonical	1	0	642	0	39								A0A498LBR0	451	1				tr|A0A498LBR0|A0A498LBR0_LABRO Sex hormone-binding globulin-like protein OS=Labeo rohita OX=84645 GN=ROHU_030117 PE=4 SV=1	Labeo rohita
A0A498LBS4		Laminin subunit beta-3	C	weak	0.996	0	1	0	1								A0A498LBS4	452	2				tr|A0A498LBS4|A0A498LBS4_LABRO Laminin subunit beta-3 OS=Labeo rohita OX=84645 GN=ROHU_035585 PE=4 SV=1	Labeo rohita
A0A498LBS5	RXN03954.1	ATP synthase subunit mitochondrial-like protein	C	canonical	1	0	1138	0	34								A0A498LBS5	453	1				tr|A0A498LBS5|A0A498LBS5_LABRO ATP synthase subunit mitochondrial-like protein OS=Labeo rohita OX=84645 GN=ROHU_020031 PE=4 SV=1	Labeo rohita
A0A498LBT2	RXN05730.1	Bucky ball	C	canonical	1	0	209	0	34								A0A498LBT2	454	1				tr|A0A498LBT2|A0A498LBT2_LABRO Bucky ball OS=Labeo rohita OX=84645 GN=ROHU_033225 PE=4 SV=1	Labeo rohita
A0A498LBT3	RXN05672.1	Nectin-2-like isoform X2	C	canonical	1	0	168	0	15								A0A498LBT3	455	1				tr|A0A498LBT3|A0A498LBT3_LABRO Nectin-2-like isoform X2 OS=Labeo rohita OX=84645 GN=ROHU_012607 PE=4 SV=1	Labeo rohita
A0A498LBU4	RXN05682.1	Formin 14	C	canonical	1	0	923	0	62								A0A498LBU4	456	1				tr|A0A498LBU4|A0A498LBU4_LABRO Formin 14 OS=Labeo rohita OX=84645 GN=ROHU_035582 PE=4 SV=1	Labeo rohita
A0A498LBU9	RXN05789.1	Actinodin2	C	indistinguishable representative	1	0	44	0	16								A0A498LBU9	457	2				tr|A0A498LBU9|A0A498LBU9_LABRO Actinodin2 OS=Labeo rohita OX=84645 GN=ROHU_033284 PE=4 SV=1	Labeo rohita
A0A498LBV3	RXN05750.1	Canopy-1 isoform X1	C	representative	0.999	0	31	0	4								A0A498LBV3	458	1				tr|A0A498LBV3|A0A498LBV3_LABRO Canopy-1 isoform X1 OS=Labeo rohita OX=84645 GN=ROHU_033245 PE=4 SV=1	Labeo rohita
A0A498LBV4	RXN02795.1	BTB POZ domain-containing KCTD12-like protein	C	canonical	1	0	356	0	18								A0A498LBV4	459	6				tr|A0A498LBV4|A0A498LBV4_LABRO BTB POZ domain-containing KCTD12-like protein OS=Labeo rohita OX=84645 GN=ROHU_013658 PE=4 SV=1	Labeo rohita
A0A498MFH0	RXN18114.1	BTB POZ domain-containing KCTD12	C	canonical	1	0	122	0	10								A0A498LBV4	459	6				tr|A0A498MFH0|A0A498MFH0_LABRO BTB POZ domain-containing KCTD12 OS=Labeo rohita OX=84645 GN=ROHU_007824 PE=4 SV=1	Labeo rohita
A0A498MTG9	RXN24958.1	BTB POZ domain-containing KCTD12-like protein	C	canonical	0.999	0	49	0	12								A0A498LBV4	459	6				tr|A0A498MTG9|A0A498MTG9_LABRO BTB POZ domain-containing KCTD12-like protein OS=Labeo rohita OX=84645 GN=ROHU_006007 PE=4 SV=1	Labeo rohita
A0A498N2P7	RXN28448.1	BTB POZ domain-containing KCTD16-like protein	C	canonical	0.999	0	33	0	6								A0A498LBV4	459	6				tr|A0A498N2P7|A0A498N2P7_LABRO BTB POZ domain-containing KCTD16-like protein OS=Labeo rohita OX=84645 GN=ROHU_005652 PE=4 SV=1	Labeo rohita
A0A498N8G3	RXN29191.1	BTB POZ domain-containing KCTD8-like protein	C	canonical	1	0	41	0	5								A0A498LBV4	459	6				tr|A0A498N8G3|A0A498N8G3_LABRO BTB POZ domain-containing KCTD8-like protein OS=Labeo rohita OX=84645 GN=ROHU_018920 PE=4 SV=1	Labeo rohita
A0A498NU35	RXN35186.1	BTB POZ domain-containing KCTD16-like protein	C	canonical	1	0	64	0	9								A0A498LBV4	459	6				tr|A0A498NU35|A0A498NU35_LABRO BTB POZ domain-containing KCTD16-like protein OS=Labeo rohita OX=84645 GN=ROHU_014425 PE=4 SV=1	Labeo rohita
A0A498LBV7	RXN04396.1	Collagen alpha-1(XI) chain-like isoform X1	C	canonical	0.998	0	25	0	8								A0A498LBV7	460	1				tr|A0A498LBV7|A0A498LBV7_LABRO Collagen alpha-1(XI) chain-like isoform X1 OS=Labeo rohita OX=84645 GN=ROHU_034031 PE=4 SV=1	Labeo rohita
A0A498LBW0	RXN03994.1	DnaJ-like protein	C	indistinguishable representative	0.998	0	8	0	2								A0A498LBW0	461	2				tr|A0A498LBW0|A0A498LBW0_LABRO DnaJ-like protein OS=Labeo rohita OX=84645 GN=ROHU_035748 PE=4 SV=1	Labeo rohita
A0A498LBW2	RXN05678.1	Guanine nucleotide-binding-like 1	C	canonical	0.999	0	12	0	5								A0A498LBW2	462	1				tr|A0A498LBW2|A0A498LBW2_LABRO Guanine nucleotide-binding-like 1 OS=Labeo rohita OX=84645 GN=ROHU_035578 PE=4 SV=1	Labeo rohita
A0A498LBX9	RXN02825.1	Integrin alpha-6-like protein	C	canonical	1	0	66	0	18								A0A498LBX9	463	5				tr|A0A498LBX9|A0A498LBX9_LABRO Integrin alpha-6-like protein OS=Labeo rohita OX=84645 GN=ROHU_013688 PE=3 SV=1	Labeo rohita
A0A498LG77	RXN07151.1	Integrin alpha-6-like protein	C	marginally distinguished	0.997	0	4	0	2								A0A498LBX9	463	5				tr|A0A498LG77|A0A498LG77_LABRO Integrin alpha-6-like protein OS=Labeo rohita OX=84645 GN=ROHU_032541 PE=3 SV=1	Labeo rohita
A0A498LQI2	RXN10659.1	Proline-rich 7-like isoform X1	C	representative	0.999	0	18	0	3								A0A498LBX9	463	5				tr|A0A498LQI2|A0A498LQI2_LABRO Proline-rich 7-like isoform X1 OS=Labeo rohita OX=84645 GN=ROHU_030499 PE=4 SV=1	Labeo rohita
A0A498LBY6	RXN04426.1	Polycystin-1-like protein	C	indistinguishable representative	0.997	0	13	0	3								A0A498LBY6	464	2				tr|A0A498LBY6|A0A498LBY6_LABRO Polycystin-1-like protein OS=Labeo rohita OX=84645 GN=ROHU_034025 PE=4 SV=1	Labeo rohita
A0A498LBY9	RXN05708.1	Medium-chain specific acyl-mitochondrial	C	canonical	1	0	3300	0	75								A0A498LBY9	465	1				tr|A0A498LBY9|A0A498LBY9_LABRO Medium-chain specific acyl-mitochondrial OS=Labeo rohita OX=84645 GN=ROHU_033203 PE=4 SV=1	Labeo rohita
A0A498LBZ1	RXN13868.1	Glycerophosphodiester phosphodiesterase domain-containing 1	C	canonical	0.999	0	9	0	4								A0A498LBZ1	466	1				tr|A0A498LBZ1|A0A498LBZ1_LABRO Glycerophosphodiester phosphodiesterase domain-containing 1 OS=Labeo rohita OX=84645 GN=ROHU_028921 PE=4 SV=1	Labeo rohita
A0A498LBZ4	RXN02835.1	Transmembrane 41A	C	weak	0.984	0	1	0	1								A0A498LBZ4	467	1				tr|A0A498LBZ4|A0A498LBZ4_LABRO Transmembrane 41A OS=Labeo rohita OX=84645 GN=ROHU_013698 PE=4 SV=1	Labeo rohita
A0A498LC08		Transmembrane 68-like protein	C	weak	0.845	0	1	0	1								A0A498LC08	468	1				tr|A0A498LC08|A0A498LC08_LABRO Transmembrane 68-like protein OS=Labeo rohita OX=84645 GN=ROHU_033223 PE=4 SV=1	Labeo rohita
A0A498LC14	RXN04456.1	Signal peptidase complex subunit 3 (EC 3.4.-.-)	C	canonical	0.999	0	100	0	4								A0A498LC14	469	1				tr|A0A498LC14|A0A498LC14_LABRO Signal peptidase complex subunit 3 OS=Labeo rohita OX=84645 GN=ROHU_012947 PE=3 SV=1	Labeo rohita
A0A498LC15	RXN04883.1	G protein-coupled receptor kinase (EC 2.7.11.-)	C	weak	0.977	0	3	0	1								A0A498LC15	470	1				tr|A0A498LC15|A0A498LC15_LABRO G protein-coupled receptor kinase OS=Labeo rohita OX=84645 GN=ROHU_012889 PE=3 SV=1	Labeo rohita
A0A498L8W6	RXN04800.1	Cystathionine beta-synthase (EC 4.2.1.22)	C	canonical	1	0	323	0	35								A0A498LC17	471	7				tr|A0A498L8W6|A0A498L8W6_LABRO Cystathionine beta-synthase OS=Labeo rohita OX=84645 GN=ROHU_029137 PE=3 SV=1	Labeo rohita
A0A498LC17	RXN02855.1	Cystathionine beta-synthase-like protein	C	canonical	1	0	1188	0	107								A0A498LC17	471	7				tr|A0A498LC17|A0A498LC17_LABRO Cystathionine beta-synthase-like protein OS=Labeo rohita OX=84645 GN=ROHU_013718 PE=3 SV=1	Labeo rohita
A0A498LY45	RXN04799.1	Splicing factor U2AF 35 kDa subunit isoform X3	C	canonical	1	0	113	0	8								A0A498LC17	471	7				tr|A0A498LY45|A0A498LY45_LABRO Splicing factor U2AF 35 kDa subunit isoform X3 OS=Labeo rohita OX=84645 GN=ROHU_029138 PE=4 SV=1	Labeo rohita
A0A498LC26	RXN05882.1	Rab proteins geranylgeranyltransferase component A	C	indistinguishable representative	0.999	0	38	0	11								A0A498LC26	472	2				tr|A0A498LC26|A0A498LC26_LABRO Rab proteins geranylgeranyltransferase component A OS=Labeo rohita OX=84645 GN=ROHU_012553 PE=3 SV=1	Labeo rohita
A0A498LC29		E3 ubiquitin-ligase DTX3L-like isoform X1	C	indistinguishable representative	0.983	0	2	0	2								A0A498LC29	473	3				tr|A0A498LC29|A0A498LC29_LABRO E3 ubiquitin-ligase DTX3L-like isoform X1 OS=Labeo rohita OX=84645 GN=ROHU_013146 PE=4 SV=1	Labeo rohita
A0A498LC39	RXN04903.1	Smad nuclear-interacting 1	C	representative	0.999	0	5	0	4								A0A498LC39	474	1				tr|A0A498LC39|A0A498LC39_LABRO Smad nuclear-interacting 1 OS=Labeo rohita OX=84645 GN=ROHU_035666 PE=4 SV=1	Labeo rohita
A0A498LC41	RXN04486.1	Docking 2-like protein	C	canonical	0.998	0	7	0	4								A0A498LC41	475	2				tr|A0A498LC41|A0A498LC41_LABRO Docking 2-like protein OS=Labeo rohita OX=84645 GN=ROHU_034018 PE=4 SV=1	Labeo rohita
A0A498LC44	RXN05871.1	Xaa-Pro dipeptidase	C	indistinguishable representative	1	0	888	0	38								A0A498LC44	476	2				tr|A0A498LC44|A0A498LC44_LABRO Xaa-Pro dipeptidase OS=Labeo rohita OX=84645 GN=ROHU_012542 PE=3 SV=1	Labeo rohita
A0A498LC57		Zymogen granule membrane 16-like protein	C	weak	0.98	0	4	0	1								A0A498LC57	477	2				tr|A0A498LC57|A0A498LC57_LABRO Zymogen granule membrane 16-like protein OS=Labeo rohita OX=84645 GN=ROHU_033112 PE=4 SV=1	Labeo rohita
A0A498L2G9	RXN02622.1	ADP-ribosylation factor 1	C	canonical	1	0	1112	0	29								A0A498LC60	478	8				tr|A0A498L2G9|A0A498L2G9_LABRO ADP-ribosylation factor 1 OS=Labeo rohita OX=84645 GN=ROHU_022067 PE=4 SV=1	Labeo rohita
A0A498L4Z6	RXN03452.1	ADP-ribosylation factor 1-like protein	C	marginally distinguished	1	0	1280	0	35								A0A498LC60	478	8				tr|A0A498L4Z6|A0A498L4Z6_LABRO ADP-ribosylation factor 1-like protein OS=Labeo rohita OX=84645 GN=ROHU_013471 PE=3 SV=1	Labeo rohita
A0A498LC60	RXN02905.1	2-oxoisovalerate dehydrogenase subunit alpha (EC 1.2.4.4) (Branched-chain alpha-keto acid dehydrogenase E1 component alpha chain)	C	canonical	1	0	855	0	40								A0A498LC60	478	8				tr|A0A498LC60|A0A498LC60_LABRO 2-oxoisovalerate dehydrogenase subunit alpha OS=Labeo rohita OX=84645 GN=ROHU_034747 PE=3 SV=1	Labeo rohita
A0A498LSX2	RXN10206.1	ADP-ribosylation factor 4	C	canonical	1	0	833	0	24								A0A498LC60	478	8				tr|A0A498LSX2|A0A498LSX2_LABRO ADP-ribosylation factor 4 OS=Labeo rohita OX=84645 GN=ROHU_010923 PE=3 SV=1	Labeo rohita
A0A498LVT6		ADP-ribosylation factor 3	C	marginally distinguished	1	0	746	0	20								A0A498LC60	478	8				tr|A0A498LVT6|A0A498LVT6_LABRO ADP-ribosylation factor 3 OS=Labeo rohita OX=84645 GN=ROHU_029882 PE=3 SV=1	Labeo rohita
A0A498M4H7	RXN27848.1	ADP-ribosylation factor 1	C	marginally distinguished	1	0	1007	0	29								A0A498LC60	478	8				tr|A0A498M4H7|A0A498M4H7_LABRO ADP-ribosylation factor 1 OS=Labeo rohita OX=84645 GN=ROHU_036377 PE=3 SV=1	Labeo rohita
A0A498NTC1	RXN34906.1	ADP-ribosylation factor 6	C	canonical	1	0	192	0	14								A0A498LC60	478	8				tr|A0A498NTC1|A0A498NTC1_LABRO ADP-ribosylation factor 6 OS=Labeo rohita OX=84645 GN=ROHU_014549 PE=3 SV=1	Labeo rohita
A0A498LC70	RXN04516.1	Alanine aminotransferase 2-like protein	C	representative	0.999	0	18	0	9								A0A498LC70	479	7				tr|A0A498LC70|A0A498LC70_LABRO Alanine aminotransferase 2-like protein OS=Labeo rohita OX=84645 GN=ROHU_035702 PE=4 SV=1	Labeo rohita
A0A498N4H3	RXN29279.1	Alanine aminotransferase 2-like protein	C	representative	0.999	0	42	0	10								A0A498LC70	479	7				tr|A0A498N4H3|A0A498N4H3_LABRO Alanine aminotransferase 2-like protein OS=Labeo rohita OX=84645 GN=ROHU_018597 PE=4 SV=1	Labeo rohita
A0A498N578	RXN29278.1	Alanine aminotransferase 2-like protein	C	representative	0.999	0	49	0	8								A0A498LC70	479	7				tr|A0A498N578|A0A498N578_LABRO Alanine aminotransferase 2-like protein OS=Labeo rohita OX=84645 GN=ROHU_018596 PE=4 SV=1	Labeo rohita
A0A498LC78	RXN03417.1	Girdin isoform X1	C	canonical	0.999	0	23	0	13								A0A498LC78	480	1				tr|A0A498LC78|A0A498LC78_LABRO Girdin isoform X1 OS=Labeo rohita OX=84645 GN=ROHU_013436 PE=4 SV=1	Labeo rohita
A0A498LC81	RXN05798.1	Amphiphysin isoform X10	C	indistinguishable representative	0.999	0	33	0	7								A0A498LC81	481	2				tr|A0A498LC81|A0A498LC81_LABRO Amphiphysin isoform X10 OS=Labeo rohita OX=84645 GN=ROHU_033293 PE=4 SV=1	Labeo rohita
A0A498LC89	RXN05808.1	XK-related protein	C	canonical	0.996	0	4	0	2								A0A498LC89	482	1				tr|A0A498LC89|A0A498LC89_LABRO XK-related protein OS=Labeo rohita OX=84645 GN=ROHU_035573 PE=3 SV=1	Labeo rohita
A0A498LC92	RXN05939.1	Protein FAM160B1	C	canonical	0.996	0	7	0	3								A0A498LC92	483	1				tr|A0A498LC92|A0A498LC92_LABRO Protein FAM160B1 OS=Labeo rohita OX=84645 GN=ROHU_012505 PE=4 SV=1	Labeo rohita
A0A498LC95	RXN04546.1	TOM1 2 isoform X2	C	canonical	0.999	0	127	0	16								A0A498LC95	484	1				tr|A0A498LC95|A0A498LC95_LABRO TOM1 2 isoform X2 OS=Labeo rohita OX=84645 GN=ROHU_033900 PE=3 SV=1	Labeo rohita
A0A498LC96	RXN20604.1	ABC transporter F family member 4-like protein	C	weak	0.991	0	1	0	1								A0A498LC96	485	1				tr|A0A498LC96|A0A498LC96_LABRO ABC transporter F family member 4-like protein OS=Labeo rohita OX=84645 GN=ROHU_024918 PE=4 SV=1	Labeo rohita
A0A498LCA1	RXN04144.1	Disintegrin and metallo ase domain-containing 10-like isoform X2	C	canonical	1	0	84	0	12								A0A498LCA1	486	2				tr|A0A498LCA1|A0A498LCA1_LABRO Disintegrin and metallo ase domain-containing 10-like isoform X2 OS=Labeo rohita OX=84645 GN=ROHU_034145 PE=4 SV=1	Labeo rohita
A0A498MDU9	RXN17474.1	Disintegrin and metallo ase domain-containing 10-like protein	C	canonical	0.999	0	61	0	10								A0A498LCA1	486	2				tr|A0A498MDU9|A0A498MDU9_LABRO Disintegrin and metallo ase domain-containing 10-like protein OS=Labeo rohita OX=84645 GN=ROHU_026875 PE=4 SV=1	Labeo rohita
A0A498LCA5	RXN04556.1	Disks large-associated 5-like isoform X3	C	canonical	0.999	0	22	0	12								A0A498LCA5	487	1				tr|A0A498LCA5|A0A498LCA5_LABRO Disks large-associated 5-like isoform X3 OS=Labeo rohita OX=84645 GN=ROHU_033910 PE=4 SV=1	Labeo rohita
A0A498LCB0	RXN05959.1	Aromatic-L-amino-acid decarboxylase-like protein	C	canonical	0.999	0	34	0	5								A0A498LCB0	488	1				tr|A0A498LCB0|A0A498LCB0_LABRO Aromatic-L-amino-acid decarboxylase-like protein OS=Labeo rohita OX=84645 GN=ROHU_012525 PE=3 SV=1	Labeo rohita
A0A498LCD0	RXN05033.1	L-2-hydroxyglutarate mitochondrial	C	indistinguishable representative	1	0	185	0	22								A0A498LCD0	489	2				tr|A0A498LCD0|A0A498LCD0_LABRO L-2-hydroxyglutarate mitochondrial OS=Labeo rohita OX=84645 GN=ROHU_033636 PE=4 SV=1	Labeo rohita
A0A498LCD5		CD209 antigen-like protein	C	weak	0.979	0	3	0	1								A0A498LCD5	490	5				tr|A0A498LCD5|A0A498LCD5_LABRO CD209 antigen-like protein OS=Labeo rohita OX=84645 GN=ROHU_033110 PE=4 SV=1	Labeo rohita
A0A498LCE5	RXN05999.1	Pyridoxal kinase-like protein	C	canonical	0.999	0	114	0	9								A0A498LCE5	491	2				tr|A0A498LCE5|A0A498LCE5_LABRO Pyridoxal kinase-like protein OS=Labeo rohita OX=84645 GN=ROHU_012480 PE=4 SV=1	Labeo rohita
A0A498NKB7	RXN32144.1	Pyridoxal kinase-like protein	C	canonical	0.999	0	82	0	6								A0A498LCE5	491	2				tr|A0A498NKB7|A0A498NKB7_LABRO Pyridoxal kinase-like protein OS=Labeo rohita OX=84645 GN=ROHU_016419 PE=4 SV=1	Labeo rohita
A0A498LCF1	RXN05053.1	MEMO1	C	indistinguishable representative	1	0	112	0	13								A0A498LCF1	492	2				tr|A0A498LCF1|A0A498LCF1_LABRO MEMO1 OS=Labeo rohita OX=84645 GN=ROHU_012821 PE=3 SV=1	Labeo rohita
A0A498LCF3	RXN05940.1	Actin-binding LIM 1-like isoform X5	C	indistinguishable representative	0.999	0	19	0	6								A0A498LCF3	493	2				tr|A0A498LCF3|A0A498LCF3_LABRO Actin-binding LIM 1-like isoform X5 OS=Labeo rohita OX=84645 GN=ROHU_012506 PE=4 SV=1	Labeo rohita
A0A498LCF8	RXN06009.1	Hermansky-Pudlak syndrome 4-like isoform X1	C	canonical	0.988	0	76	0	2								A0A498LCF8	494	1				tr|A0A498LCF8|A0A498LCF8_LABRO Hermansky-Pudlak syndrome 4-like isoform X1 OS=Labeo rohita OX=84645 GN=ROHU_012490 PE=4 SV=1	Labeo rohita
A0A498LCG8	RXN03507.1	Leucine-rich repeat-containing 16B isoform X2	C	weak	0.989	0	2	0	1								A0A498LCG8	495	2				tr|A0A498LCG8|A0A498LCG8_LABRO Leucine-rich repeat-containing 16B isoform X2 OS=Labeo rohita OX=84645 GN=ROHU_035800 PE=4 SV=1	Labeo rohita
A0A498LCG9	RXN04616.1	Lipoma-preferred partner-like protein	C	indistinguishable representative	1	0	1283	0	57								A0A498LCG9	496	2				tr|A0A498LCG9|A0A498LCG9_LABRO Lipoma-preferred partner-like protein OS=Labeo rohita OX=84645 GN=ROHU_033970 PE=4 SV=1	Labeo rohita
A0A498LCH3	RXN05908.1	Cleft lip and palate transmembrane 1	C	representative	0.998	0	9	0	2								A0A498LCH3	497	1				tr|A0A498LCH3|A0A498LCH3_LABRO Cleft lip and palate transmembrane 1 OS=Labeo rohita OX=84645 GN=ROHU_033121 PE=4 SV=1	Labeo rohita
A0A498LCH7	RXN04626.1	Rootletin-like protein	C	canonical	0.998	0	17	0	9								A0A498LCH7	498	1				tr|A0A498LCH7|A0A498LCH7_LABRO Rootletin-like protein OS=Labeo rohita OX=84645 GN=ROHU_033980 PE=4 SV=1	Labeo rohita
A0A498LCI1	RXN05902.1	Zymogen granule membrane 16-like protein	C	weak	0.98	0	3	0	1								A0A498LCI1	499	2				tr|A0A498LCI1|A0A498LCI1_LABRO Zymogen granule membrane 16-like protein OS=Labeo rohita OX=84645 GN=ROHU_033115 PE=4 SV=1	Labeo rohita
A0A498LBV2	RXN05692.1	Vigilin-like protein	C	canonical	0.999	0	140	0	15								A0A498LCI4	500	6				tr|A0A498LBV2|A0A498LBV2_LABRO Vigilin-like protein OS=Labeo rohita OX=84645 GN=ROHU_030119 PE=4 SV=1	Labeo rohita
A0A498LCI4	RXN04636.1	Vigilin isoform X2	C	canonical	1	0	1699	0	100								A0A498LCI4	500	6				tr|A0A498LCI4|A0A498LCI4_LABRO Vigilin isoform X2 OS=Labeo rohita OX=84645 GN=ROHU_033990 PE=4 SV=1	Labeo rohita
A0A498M0Q4	RXN13403.1	Kinase C-binding NELL2-like protein	C	canonical	1	0	43	0	11								A0A498LCI4	500	6				tr|A0A498M0Q4|A0A498M0Q4_LABRO Kinase C-binding NELL2-like protein OS=Labeo rohita OX=84645 GN=ROHU_009739 PE=4 SV=1	Labeo rohita
A0A498LCI6	RXN05912.1	Centrosomal of 76 kDa	C	weak	0.902	0	2	0	1								A0A498LCI6	501	1				tr|A0A498LCI6|A0A498LCI6_LABRO Centrosomal of 76 kDa OS=Labeo rohita OX=84645 GN=ROHU_033125 PE=4 SV=1	Labeo rohita
A0A498LCJ0	RXN04234.1	26S proteasome non-ATPase regulatory subunit 6	C	indistinguishable representative	1	0	854	0	38								A0A498LCJ0	502	2				tr|A0A498LCJ0|A0A498LCJ0_LABRO 26S proteasome non-ATPase regulatory subunit 6 OS=Labeo rohita OX=84645 GN=ROHU_013079 PE=4 SV=1	Labeo rohita
A0A498LCJ6	RXN05938.1	Zinc finger FYVE domain-containing 21 isoform X2	C	indistinguishable representative	0.999	0	26	0	5								A0A498LCJ6	503	2				tr|A0A498LCJ6|A0A498LCJ6_LABRO Zinc finger FYVE domain-containing 21 isoform X2 OS=Labeo rohita OX=84645 GN=ROHU_012504 PE=4 SV=1	Labeo rohita
A0A498LCK2	RXN06001.1	Homeobox PKNOX1-like isoform X1	C	canonical	0.999	0	108	0	13								A0A498LCK2	504	1				tr|A0A498LCK2|A0A498LCK2_LABRO Homeobox PKNOX1-like isoform X1 OS=Labeo rohita OX=84645 GN=ROHU_012482 PE=4 SV=1	Labeo rohita
A0A498LCK7	RXN04268.1	Inter-alpha-trypsin inhibitor heavy chain H2	C	canonical	0.999	0	63	0	4								A0A498LCK7	505	1				tr|A0A498LCK7|A0A498LCK7_LABRO Inter-alpha-trypsin inhibitor heavy chain H2 OS=Labeo rohita OX=84645 GN=ROHU_013041 PE=4 SV=1	Labeo rohita
A0A498LCL0	RXN04254.1	Protein FAM184A-like isoform X1	C	weak	0.929	0	1	0	1								A0A498LCL0	506	1				tr|A0A498LCL0|A0A498LCL0_LABRO Protein FAM184A-like isoform X1 OS=Labeo rohita OX=84645 GN=ROHU_013047 PE=4 SV=1	Labeo rohita
A0A498LCL8		Echinoderm microtubule-associated-like 3	C	weak	0.987	0	1	0	1								A0A498LCL8	507	1				tr|A0A498LCL8|A0A498LCL8_LABRO Echinoderm microtubule-associated-like 3 OS=Labeo rohita OX=84645 GN=ROHU_033038 PE=4 SV=1	Labeo rohita
A0A498LCN4	RXN06089.1	Aspartyl asparaginyl beta-hydroxylase isoform X2	C	indistinguishable representative	0.983	0	18	0	3								A0A498LCN4	508	2				tr|A0A498LCN4|A0A498LCN4_LABRO Aspartyl asparaginyl beta-hydroxylase isoform X2 OS=Labeo rohita OX=84645 GN=ROHU_033058 PE=4 SV=1	Labeo rohita
A0A498LCN5	RXN06031.1	ABHD4-like isoform X1	C	canonical	0.998	0	3	0	2								A0A498LCN5	509	1				tr|A0A498LCN5|A0A498LCN5_LABRO ABHD4-like isoform X1 OS=Labeo rohita OX=84645 GN=ROHU_033084 PE=4 SV=1	Labeo rohita
A0A498LCN6	RXN05962.1	O-linked-mannose beta-1,4-N-acetylglucosaminyltransferase 2	C	canonical	0.998	0	4	0	3								A0A498LCN6	510	1				tr|A0A498LCN6|A0A498LCN6_LABRO O-linked-mannose beta-1,4-N-acetylglucosaminyltransferase 2 OS=Labeo rohita OX=84645 GN=ROHU_012528 PE=4 SV=1	Labeo rohita
A0A498LCP1	RXN03075.1	SH3 domain-binding glutamic acid-rich-like protein	C	canonical	1	0	33	0	4								A0A498LCP1	511	1				tr|A0A498LCP1|A0A498LCP1_LABRO SH3 domain-binding glutamic acid-rich-like protein OS=Labeo rohita OX=84645 GN=ROHU_034661 PE=3 SV=1	Labeo rohita
A0A498LCQ6	RXN06020.1	Anaphase-promoting complex subunit 5	C	weak	0.953	0	1	0	1								A0A498LCQ6	512	2				tr|A0A498LCQ6|A0A498LCQ6_LABRO Anaphase-promoting complex subunit 5 OS=Labeo rohita OX=84645 GN=ROHU_012501 PE=4 SV=1	Labeo rohita
A0A498LCR1	RXN06018.1	Gamma-glutamyltranspeptidase 1-like protein	C	indistinguishable representative	0.994	0	3	0	2								A0A498LCR1	513	2				tr|A0A498LCR1|A0A498LCR1_LABRO Gamma-glutamyltranspeptidase 1-like protein OS=Labeo rohita OX=84645 GN=ROHU_012499 PE=4 SV=1	Labeo rohita
A0A498LCR9	RXN03105.1	Monocarboxylate transporter 5	C	weak	0.989	0	3	0	1								A0A498LCR9	514	2				tr|A0A498LCR9|A0A498LCR9_LABRO Monocarboxylate transporter 5 OS=Labeo rohita OX=84645 GN=ROHU_034691 PE=4 SV=1	Labeo rohita
A0A498LCS3	RXN06040.1	Phospholipid phosphatase 2-like protein	C	weak	0.985	0	7	0	1								A0A498LCS3	515	1				tr|A0A498LCS3|A0A498LCS3_LABRO Phospholipid phosphatase 2-like protein OS=Labeo rohita OX=84645 GN=ROHU_033093 PE=4 SV=1	Labeo rohita
A0A498LCU0	RXN06050.1	RalA-binding 1	C	canonical	0.988	0	2	0	2								A0A498LCU0	516	1				tr|A0A498LCU0|A0A498LCU0_LABRO RalA-binding 1 OS=Labeo rohita OX=84645 GN=ROHU_035545 PE=4 SV=1	Labeo rohita
A0A498LCU2	RXN03607.1	Roundabout-like protein	C	indistinguishable representative	0.998	0	7	0	4								A0A498LCU2	517	2				tr|A0A498LCU2|A0A498LCU2_LABRO Roundabout-like protein OS=Labeo rohita OX=84645 GN=ROHU_035785 PE=4 SV=1	Labeo rohita
A0A498LCU9		Evolutionarily conserved signaling intermediate in Toll mitochondrial-like protein	C	weak	0.996	0	1	0	1								A0A498LCU9	518	1				tr|A0A498LCU9|A0A498LCU9_LABRO Evolutionarily conserved signaling intermediate in Toll mitochondrial-like protein OS=Labeo rohita OX=84645 GN=ROHU_033037 PE=4 SV=1	Labeo rohita
A0A498LCV6		CMP-N-acetylneuraminate-beta-galactosamide-alpha-2,3-sialyltransferase 1-like protein	C	weak	1	0	1	0	1								A0A498LCV6	519	2				tr|A0A498LCV6|A0A498LCV6_LABRO CMP-N-acetylneuraminate-beta-galactosamide-alpha-2,3-sialyltransferase 1-like protein OS=Labeo rohita OX=84645 GN=ROHU_033570 PE=3 SV=1	Labeo rohita
A0A498LCW2	RXN06101.1	UPF0577 protein KIAA1324-like	C	canonical	0.994	0	4	0	3								A0A498LCW2	520	1				tr|A0A498LCW2|A0A498LCW2_LABRO UPF0577 protein KIAA1324-like OS=Labeo rohita OX=84645 GN=ROHU_033070 PE=4 SV=1	Labeo rohita
A0A498LCW4	RXN06070.1	Metastasis-associated MTA2-like protein	C	canonical	0.999	0	65	0	15								A0A498LCW4	521	2				tr|A0A498LCW4|A0A498LCW4_LABRO Metastasis-associated MTA2-like protein OS=Labeo rohita OX=84645 GN=ROHU_033039 PE=4 SV=1	Labeo rohita
A0A498LMK8	RXN09609.1	Metastasis-associated MTA3-like protein	C	marginally distinguished	0.996	0	4	0	2								A0A498LCW4	521	2				tr|A0A498LMK8|A0A498LMK8_LABRO Metastasis-associated MTA3-like protein OS=Labeo rohita OX=84645 GN=ROHU_031276 PE=4 SV=1	Labeo rohita
A0A498LCW5	RXN04766.1	KDEL motif-containing 2	C	indistinguishable representative	0.995	0	12	0	7								A0A498LCW5	522	2				tr|A0A498LCW5|A0A498LCW5_LABRO KDEL motif-containing 2 OS=Labeo rohita OX=84645 GN=ROHU_033749 PE=4 SV=1	Labeo rohita
A0A498LCW6		Cyclin-dependent kinase 12-like isoform X1	C	weak	0.9	0	1	0	1								A0A498LCW6	523	2				tr|A0A498LCW6|A0A498LCW6_LABRO Cyclin-dependent kinase 12-like isoform X1 OS=Labeo rohita OX=84645 GN=ROHU_035637 PE=4 SV=1	Labeo rohita
A0A498LCW8	RXN06042.1	C2 calcium-dependent domain-containing 4C-like protein	C	weak	0.989	0	1	0	1								A0A498LCW8	524	1				tr|A0A498LCW8|A0A498LCW8_LABRO C2 calcium-dependent domain-containing 4C-like protein OS=Labeo rohita OX=84645 GN=ROHU_033095 PE=4 SV=1	Labeo rohita
A0A498LCY3	RXN06090.1	Syntenin-1	C	canonical	0.999	0	5	0	4								A0A498LCY3	525	1				tr|A0A498LCY3|A0A498LCY3_LABRO Syntenin-1 OS=Labeo rohita OX=84645 GN=ROHU_016741 PE=3 SV=1	Labeo rohita
A0A498LCZ3	RXN06131.1	MOB kinase activator 2-like isoform X1	C	canonical	0.999	0	21	0	4								A0A498LCZ3	526	2				tr|A0A498LCZ3|A0A498LCZ3_LABRO MOB kinase activator 2-like isoform X1 OS=Labeo rohita OX=84645 GN=ROHU_024658 PE=4 SV=1	Labeo rohita
A0A498P3M8	RXN38803.1	MOB kinase activator 2-like isoform X1	C	canonical	0.999	0	15	0	3								A0A498LCZ3	526	2				tr|A0A498P3M8|A0A498P3M8_LABRO MOB kinase activator 2-like isoform X1 OS=Labeo rohita OX=84645 GN=ROHU_000779 PE=4 SV=1	Labeo rohita
A0A498LD02	RXN03657.1	40S ribosomal S10	C	canonical	1	0	664	0	24								A0A498LD02	527	1				tr|A0A498LD02|A0A498LD02_LABRO 40S ribosomal S10 OS=Labeo rohita OX=84645 GN=ROHU_034367 PE=4 SV=1	Labeo rohita
A0A498LD03	RXN06128.1	Leucine-rich repeat and fibronectin type III domain-containing 1	C	indistinguishable representative	0.991	0	3	0	2								A0A498LD03	528	2				tr|A0A498LD03|A0A498LD03_LABRO Leucine-rich repeat and fibronectin type III domain-containing 1 OS=Labeo rohita OX=84645 GN=ROHU_033023 PE=4 SV=1	Labeo rohita
A0A498LD08	RXN04394.1	Neurogenic locus notch-like protein	C	indistinguishable representative	0.996	0	9	0	5								A0A498LD08	529	5				tr|A0A498LD08|A0A498LD08_LABRO Neurogenic locus notch-like protein OS=Labeo rohita OX=84645 GN=ROHU_034029 PE=4 SV=1	Labeo rohita
A0A498LD14	RXN05283.1	Sorting nexin-1-like protein	C	canonical	1	0	1053	0	35								A0A498LD14	530	5				tr|A0A498LD14|A0A498LD14_LABRO Sorting nexin-1-like protein OS=Labeo rohita OX=84645 GN=ROHU_033513 PE=4 SV=1	Labeo rohita
A0A498MDE0	RXN17314.1	Sorting nexin-1-like isoform X2	C	marginally distinguished	0.999	0	65	0	9								A0A498LD14	530	5				tr|A0A498MDE0|A0A498MDE0_LABRO Sorting nexin-1-like isoform X2 OS=Labeo rohita OX=84645 GN=ROHU_026994 PE=4 SV=1	Labeo rohita
A0A498N6C7	RXN28620.1	Sorting nexin-2	C	canonical	1	0	109	0	7								A0A498LD14	530	5				tr|A0A498N6C7|A0A498N6C7_LABRO Sorting nexin-2 OS=Labeo rohita OX=84645 GN=ROHU_019221 PE=4 SV=1	Labeo rohita
A0A498LD15		CMP-sialic acid transporter	C	weak	0.739	0	1	0	1								A0A498LD15	531	1				tr|A0A498LD15|A0A498LD15_LABRO CMP-sialic acid transporter OS=Labeo rohita OX=84645 GN=ROHU_012429 PE=4 SV=1	Labeo rohita
A0A498LD21	RXN03677.1	RTF2-like protein	C	canonical	0.999	0	4	0	3								A0A498LD21	532	1				tr|A0A498LD21|A0A498LD21_LABRO RTF2-like protein OS=Labeo rohita OX=84645 GN=ROHU_009389 PE=4 SV=1	Labeo rohita
A0A498LD23	RXN06148.1	Ribosome production factor 2-like protein	C	canonical	1	0	45	0	16								A0A498LD23	533	1				tr|A0A498LD23|A0A498LD23_LABRO Ribosome production factor 2-like protein OS=Labeo rohita OX=84645 GN=ROHU_012426 PE=4 SV=1	Labeo rohita
A0A498LD24	RXN05293.1	AP-3 complex subunit beta	C	canonical	0.999	0	153	0	31								A0A498LD24	534	3				tr|A0A498LD24|A0A498LD24_LABRO AP-3 complex subunit beta OS=Labeo rohita OX=84645 GN=ROHU_035627 PE=3 SV=1	Labeo rohita
A0A498M1W5	RXN11655.1	AP-3 complex subunit beta-1-like protein	C	canonical	1	0	105	0	28								A0A498LD24	534	3				tr|A0A498M1W5|A0A498M1W5_LABRO AP-3 complex subunit beta-1-like protein OS=Labeo rohita OX=84645 GN=ROHU_010495 PE=4 SV=1	Labeo rohita
A0A498LD27	RXN04826.1	La-related 1 isoform X1	C	indistinguishable representative	0.999	0	33	0	9								A0A498LD27	535	2				tr|A0A498LD27|A0A498LD27_LABRO La-related 1 isoform X1 OS=Labeo rohita OX=84645 GN=ROHU_035671 PE=4 SV=1	Labeo rohita
A0A498LD35		Monocyte chemotactic 1B-like protein	C	weak	0.932	0	1	0	1								A0A498LD35	536	1				tr|A0A498LD35|A0A498LD35_LABRO Monocyte chemotactic 1B-like protein OS=Labeo rohita OX=84645 GN=ROHU_012712 PE=4 SV=1	Labeo rohita
A0A498LD36	RXN04836.1	Phosphatidylethanolamine-binding 4	C	weak	0.984	0	5	0	1								A0A498LD36	537	1				tr|A0A498LD36|A0A498LD36_LABRO Phosphatidylethanolamine-binding 4 OS=Labeo rohita OX=84645 GN=ROHU_012842 PE=4 SV=1	Labeo rohita
A0A498LD39	RXN06249.1	Ribonuclease H1 (RNase H1) (EC 3.1.26.4)	C	indistinguishable representative	0.999	0	12	0	6								A0A498LD39	538	2				tr|A0A498LD39|A0A498LD39_LABRO Ribonuclease H1 OS=Labeo rohita OX=84645 GN=ROHU_032849 PE=3 SV=1	Labeo rohita
A0A498LD43	RXN06102.1	Heat shock 70 kDa 14	C	canonical	0.999	0	91	0	27								A0A498LD43	539	1				tr|A0A498LD43|A0A498LD43_LABRO Heat shock 70 kDa 14 OS=Labeo rohita OX=84645 GN=ROHU_033071 PE=3 SV=1	Labeo rohita
A0A498LD50	RXN06178.1	Receptor-type tyrosine-phosphatase kappa-like protein	C	canonical	0.999	0	3	0	2								A0A498LD50	540	1				tr|A0A498LD50|A0A498LD50_LABRO Receptor-type tyrosine-phosphatase kappa-like protein OS=Labeo rohita OX=84645 GN=ROHU_012456 PE=4 SV=1	Labeo rohita
A0A498LD54		Conserved oligomeric Golgi complex subunit 3	C	weak	0.931	0	1	0	1								A0A498LD54	541	2				tr|A0A498LD54|A0A498LD54_LABRO Conserved oligomeric Golgi complex subunit 3 OS=Labeo rohita OX=84645 GN=ROHU_012705 PE=4 SV=1	Labeo rohita
A0A498L4B2	RXN03251.1	Sulfotransferase (EC 2.8.2.-)	C	canonical	1	0	234	0	22								A0A498LD61	542	5				tr|A0A498L4B2|A0A498L4B2_LABRO Sulfotransferase OS=Labeo rohita OX=84645 GN=ROHU_013531 PE=3 SV=1	Labeo rohita
A0A498L4C8	RXN03252.1	Sulfotransferase (EC 2.8.2.-)	C	canonical	0.999	0	117	0	12								A0A498LD61	542	5				tr|A0A498L4C8|A0A498L4C8_LABRO Sulfotransferase OS=Labeo rohita OX=84645 GN=ROHU_013532 PE=3 SV=1	Labeo rohita
A0A498L747	RXN03253.1	Sulfotransferase (EC 2.8.2.-)	C	canonical	1	0	198	0	15								A0A498LD61	542	5				tr|A0A498L747|A0A498L747_LABRO Sulfotransferase OS=Labeo rohita OX=84645 GN=ROHU_013533 PE=3 SV=1	Labeo rohita
A0A498L9X7	RXN03254.1	Sulfotransferase (EC 2.8.2.-)	C	canonical	1	0	501	0	33								A0A498LD61	542	5				tr|A0A498L9X7|A0A498L9X7_LABRO Sulfotransferase OS=Labeo rohita OX=84645 GN=ROHU_013534 PE=3 SV=1	Labeo rohita
A0A498LD61	RXN03255.1	Sulfotransferase (EC 2.8.2.-)	C	canonical	1	0	543	0	35								A0A498LD61	542	5				tr|A0A498LD61|A0A498LD61_LABRO Sulfotransferase OS=Labeo rohita OX=84645 GN=ROHU_013535 PE=3 SV=1	Labeo rohita
A0A498LD67	RXN06122.1	Ribosome maturation SBDS	C	indistinguishable representative	1	0	100	0	11								A0A498LD67	543	3				tr|A0A498LD67|A0A498LD67_LABRO Ribosome maturation SBDS OS=Labeo rohita OX=84645 GN=ROHU_033017 PE=4 SV=1	Labeo rohita
A0A498LD68	RXN06201.1	Atypical kinase mitochondrial	C	canonical	1	0	248	0	22								A0A498LD68	544	1				tr|A0A498LD68|A0A498LD68_LABRO Atypical kinase mitochondrial OS=Labeo rohita OX=84645 GN=ROHU_032981 PE=4 SV=1	Labeo rohita
A0A498LD70	RXN06198.1	C-C motif chemokine 8-like protein	C	canonical	1	0	45	0	7								A0A498LD70	545	1				tr|A0A498LD70|A0A498LD70_LABRO C-C motif chemokine 8-like protein OS=Labeo rohita OX=84645 GN=ROHU_032978 PE=4 SV=1	Labeo rohita
A0A498LD72	RXN06180.1	LEG1-like protein	C	canonical	1	0	603	0	25								A0A498LD72	546	1				tr|A0A498LD72|A0A498LD72_LABRO LEG1-like protein OS=Labeo rohita OX=84645 GN=ROHU_012458 PE=4 SV=1	Labeo rohita
A0A498LD75	RXN04464.1	High mobility group B2-like protein	C	canonical	1	0	2101	0	39								A0A498LD75	547	8				tr|A0A498LD75|A0A498LD75_LABRO High mobility group B2-like protein OS=Labeo rohita OX=84645 GN=ROHU_012955 PE=4 SV=1	Labeo rohita
A0A498LMZ7	RXN08436.1	High mobility group B2-like protein	C	canonical	1	0	481	0	25								A0A498LD75	547	8				tr|A0A498LMZ7|A0A498LMZ7_LABRO High mobility group B2-like protein OS=Labeo rohita OX=84645 GN=ROHU_031858 PE=4 SV=1	Labeo rohita
A0A498M5Z1		Katanin p60 ATPase-containing subunit A1 (Katanin p60 subunit A1) (EC 5.6.1.1) (p60 katanin)	C	indistinguishable representative	0.997	0	19	0	2								A0A498LD75	547	8				tr|A0A498M5Z1|A0A498M5Z1_LABRO Katanin p60 ATPase-containing subunit A1 OS=Labeo rohita OX=84645 GN=KATNA1 PE=3 SV=1	Labeo rohita
A0A498M7J9	RXN13157.1	Katanin p60 ATPase-containing subunit A-like 1	C	canonical	1	0	1156	0	44								A0A498LD75	547	8				tr|A0A498M7J9|A0A498M7J9_LABRO Katanin p60 ATPase-containing subunit A-like 1 OS=Labeo rohita OX=84645 GN=ROHU_029144 PE=4 SV=1	Labeo rohita
A0A498MEU0	RXN18680.1	High mobility group B3-like protein	C	canonical	1	0	324	0	18								A0A498LD75	547	8				tr|A0A498MEU0|A0A498MEU0_LABRO High mobility group B3-like protein OS=Labeo rohita OX=84645 GN=ROHU_007658 PE=4 SV=1	Labeo rohita
A0A498MHF5	RXN18774.1	Protocadherin Fat 4-like protein	C	canonical	1	0	596	0	33								A0A498LD75	547	8				tr|A0A498MHF5|A0A498MHF5_LABRO Protocadherin Fat 4-like protein OS=Labeo rohita OX=84645 GN=ROHU_026067 PE=4 SV=1	Labeo rohita
A0A498MJU1	RXN21579.1	High mobility group B3-like protein	C	canonical	1	0	193	0	20								A0A498LD75	547	8				tr|A0A498MJU1|A0A498MJU1_LABRO High mobility group B3-like protein OS=Labeo rohita OX=84645 GN=ROHU_024158 PE=4 SV=1	Labeo rohita
A0A498LD80	RXN04474.1	von Willebrand factor A domain-containing 7-like protein	C	canonical	0.999	0	672	0	20								A0A498LD80	548	2				tr|A0A498LD80|A0A498LD80_LABRO von Willebrand factor A domain-containing 7-like protein OS=Labeo rohita OX=84645 GN=ROHU_035706 PE=4 SV=1	Labeo rohita
A0A498MY16	RXN21545.1	Prostaglandin reductase 1-like protein	C	canonical	1	0	430	0	16								A0A498LD80	548	2				tr|A0A498MY16|A0A498MY16_LABRO Prostaglandin reductase 1-like protein OS=Labeo rohita OX=84645 GN=ROHU_024124 PE=4 SV=1	Labeo rohita
A0A498LD97	RXN06228.1	Enabled-like protein	C	indistinguishable representative	0.999	0	52	0	10								A0A498LD97	549	3				tr|A0A498LD97|A0A498LD97_LABRO Enabled-like protein OS=Labeo rohita OX=84645 GN=ROHU_032952 PE=4 SV=1	Labeo rohita
A0A498LDA4	RXN16826.1	Kinesin-associated 3-like protein	C	weak	0.989	0	4	0	1								A0A498LDA4	550	1				tr|A0A498LDA4|A0A498LDA4_LABRO Kinesin-associated 3-like protein OS=Labeo rohita OX=84645 GN=ROHU_027303 PE=4 SV=1	Labeo rohita
A0A498LDA6	RXN06152.1	Putative arginine--tRNA mitochondrial	C	canonical	0.998	0	10	0	4								A0A498LDA6	551	1				tr|A0A498LDA6|A0A498LDA6_LABRO Putative arginine--tRNA mitochondrial OS=Labeo rohita OX=84645 GN=ROHU_012430 PE=3 SV=1	Labeo rohita
A0A498LDA8	RXN06241.1	Vacuolar sorting-associated VTA1-like protein	C	canonical	1	0	107	0	15								A0A498LDA8	552	1				tr|A0A498LDA8|A0A498LDA8_LABRO Vacuolar sorting-associated VTA1-like protein OS=Labeo rohita OX=84645 GN=ROHU_032965 PE=4 SV=1	Labeo rohita
A0A498LDC1	RXN05393.1	NADH dehydrogenase [ubiquinone] iron-sulfur 5	C	canonical	1	0	258	0	10								A0A498LDC1	553	1				tr|A0A498LDC1|A0A498LDC1_LABRO NADH dehydrogenase [ubiquinone] iron-sulfur 5 OS=Labeo rohita OX=84645 GN=ROHU_021017 PE=4 SV=1	Labeo rohita
A0A498LDC5		Fibronectin type III domain-containing 1-like protein	C	indistinguishable representative	0.98	0	2	0	2								A0A498LDC5	554	2				tr|A0A498LDC5|A0A498LDC5_LABRO Fibronectin type III domain-containing 1-like protein OS=Labeo rohita OX=84645 GN=ROHU_032858 PE=4 SV=1	Labeo rohita
A0A498LDC6	RXN16771.1	Disulfide-isomerase A6	C	canonical	1	0	240	0	9								A0A498LDC6	555	1				tr|A0A498LDC6|A0A498LDC6_LABRO Disulfide-isomerase A6 OS=Labeo rohita OX=84645 GN=ROHU_027248 PE=4 SV=1	Labeo rohita
A0A498LDD0	RXN03767.1	Collagen alpha-1(VII) chain	C	indistinguishable representative	1	0	34	0	14								A0A498LDD0	556	2				tr|A0A498LDD0|A0A498LDD0_LABRO Collagen alpha-1(VII) chain OS=Labeo rohita OX=84645 GN=ROHU_013217 PE=4 SV=1	Labeo rohita
A0A498LDD4	RXN06268.1	Ras-related Rab-32	C	indistinguishable representative	0.999	0	33	0	8								A0A498LDD4	557	9				tr|A0A498LDD4|A0A498LDD4_LABRO Ras-related Rab-32 OS=Labeo rohita OX=84645 GN=ROHU_032868 PE=4 SV=1	Labeo rohita
A0A498LFC2		Ras-related Rab-38-like protein	C	representative	0.999	0	19	0	5								A0A498LDD4	557	9				tr|A0A498LFC2|A0A498LFC2_LABRO Ras-related Rab-38-like protein OS=Labeo rohita OX=84645 GN=ROHU_012132 PE=4 SV=1	Labeo rohita
A0A498N251	RXN27150.1	Metabotropic glutamate receptor 5-like protein	C	representative	0.999	0	30	0	8								A0A498LDD4	557	9				tr|A0A498N251|A0A498N251_LABRO Metabotropic glutamate receptor 5-like protein OS=Labeo rohita OX=84645 GN=ROHU_020290 PE=3 SV=1	Labeo rohita
A0A498LDE1	RXN03777.1	Peptidyl-prolyl cis-trans isomerase (PPIase) (EC 5.2.1.8)	C	canonical	1	0	62	0	7								A0A498LDE1	558	1				tr|A0A498LDE1|A0A498LDE1_LABRO Peptidyl-prolyl cis-trans isomerase OS=Labeo rohita OX=84645 GN=ROHU_013227 PE=3 SV=1	Labeo rohita
A0A498LDG5		FAD synthase-like isoform X1	C	weak	0.938	0	1	0	1								A0A498LDG5	559	1				tr|A0A498LDG5|A0A498LDG5_LABRO FAD synthase-like isoform X1 OS=Labeo rohita OX=84645 GN=ROHU_030852 PE=4 SV=1	Labeo rohita
A0A498LDH3	RXN03807.1	Poly [ADP-ribose] polymerase (PARP) (EC 2.4.2.-)	C	canonical	0.999	0	82	0	17								A0A498LDH3	560	2				tr|A0A498LDH3|A0A498LDH3_LABRO Poly [ADP-ribose] polymerase OS=Labeo rohita OX=84645 GN=ROHU_013257 PE=3 SV=1	Labeo rohita
A0A498NRE0	RXN34328.1	Metabotropic glutamate receptor 2-like protein	C	canonical	0.999	0	18	0	9								A0A498LDH3	560	2				tr|A0A498NRE0|A0A498NRE0_LABRO Metabotropic glutamate receptor 2-like protein OS=Labeo rohita OX=84645 GN=ROHU_015051 PE=3 SV=1	Labeo rohita
A0A498LDH5	RXN04996.1	Pyridoxal phosphate phosphatase-like protein	C	canonical	0.999	0	78	0	11								A0A498LDH5	561	1				tr|A0A498LDH5|A0A498LDH5_LABRO Pyridoxal phosphate phosphatase-like protein OS=Labeo rohita OX=84645 GN=ROHU_012838 PE=3 SV=1	Labeo rohita
A0A498LDH7	RXN05453.1	L-rhamnose-binding lectin CSL2-like protein	C	weak	0.996	0	1	0	1								A0A498LDH7	562	1				tr|A0A498LDH7|A0A498LDH7_LABRO L-rhamnose-binding lectin CSL2-like protein OS=Labeo rohita OX=84645 GN=ROHU_033469 PE=4 SV=1	Labeo rohita
A0A498LDI5	RXN05006.1	Endoplasmic reticulum lectin 1-like isoform X1	C	indistinguishable representative	1	0	13	0	6								A0A498LDI5	563	2				tr|A0A498LDI5|A0A498LDI5_LABRO Endoplasmic reticulum lectin 1-like isoform X1 OS=Labeo rohita OX=84645 GN=ROHU_033609 PE=4 SV=1	Labeo rohita
A0A498LDI6	RXN16825.1	Kinesin-associated 3-like protein	C	weak	0.955	0	1	0	1								A0A498LDI6	564	1				tr|A0A498LDI6|A0A498LDI6_LABRO Kinesin-associated 3-like protein OS=Labeo rohita OX=84645 GN=ROHU_027302 PE=4 SV=1	Labeo rohita
A0A498LDI8	RXN04584.1	Calpain-2 catalytic subunit-like protein	C	canonical	0.998	0	5	0	2								A0A498LDI8	565	1				tr|A0A498LDI8|A0A498LDI8_LABRO Calpain-2 catalytic subunit-like protein OS=Labeo rohita OX=84645 GN=ROHU_033938 PE=4 SV=1	Labeo rohita
A0A498LDJ1		Ubinuclein-1-like isoform X3	C	weak	0.99	0	6	0	1								A0A498LDJ1	566	2				tr|A0A498LDJ1|A0A498LDJ1_LABRO Ubinuclein-1-like isoform X3 OS=Labeo rohita OX=84645 GN=ROHU_032839 PE=4 SV=1	Labeo rohita
A0A498LDJ8	RXN06310.1	Actin-related protein 2/3 complex subunit 5	C	canonical	1	0	148	0	17								A0A498LDJ8	567	5				tr|A0A498LDJ8|A0A498LDJ8_LABRO Actin-related protein 2/3 complex subunit 5 OS=Labeo rohita OX=84645 GN=ROHU_027295 PE=3 SV=1	Labeo rohita
A0A498LLR3	RXN08742.1	Influenza virus NS1A-binding-like protein	C	canonical	0.999	0	71	0	14								A0A498LDJ8	567	5				tr|A0A498LLR3|A0A498LLR3_LABRO Influenza virus NS1A-binding-like protein OS=Labeo rohita OX=84645 GN=ROHU_035320 PE=4 SV=1	Labeo rohita
A0A498M832	RXN16821.1	Influenza virus NS1A-binding	C	canonical	0.999	0	6	0	4								A0A498LDJ8	567	5				tr|A0A498M832|A0A498M832_LABRO Influenza virus NS1A-binding OS=Labeo rohita OX=84645 GN=ROHU_027298 PE=4 SV=1	Labeo rohita
A0A498LDJ9	RXN16839.1	Stathmin-4	C	canonical	0.997	0	5	0	3								A0A498LDJ9	568	1				tr|A0A498LDJ9|A0A498LDJ9_LABRO Stathmin-4 OS=Labeo rohita OX=84645 GN=ROHU_027316 PE=4 SV=1	Labeo rohita
A0A498LDK4	RXN03405.1	Putative serine threonine-kinase kinX	C	indistinguishable representative	0.999	0	28	0	5								A0A498LDK4	569	2				tr|A0A498LDK4|A0A498LDK4_LABRO Putative serine threonine-kinase kinX OS=Labeo rohita OX=84645 GN=ROHU_013424 PE=4 SV=1	Labeo rohita
A0A498LDK5	RXN05026.1	Desumoylating isopeptidase 2-like protein	C	canonical	1	0	67	0	8								A0A498LDK5	570	2				tr|A0A498LDK5|A0A498LDK5_LABRO Desumoylating isopeptidase 2-like protein OS=Labeo rohita OX=84645 GN=ROHU_033629 PE=4 SV=1	Labeo rohita
A0A498LDK7	RXN16845.1	Non-specific serine/threonine protein kinase (EC 2.7.11.1)	C	canonical	0.999	0	35	0	12								A0A498LDK7	571	5				tr|A0A498LDK7|A0A498LDK7_LABRO Non-specific serine/threonine protein kinase OS=Labeo rohita OX=84645 GN=ROHU_027322 PE=3 SV=1	Labeo rohita
A0A498M492	RXN15350.1	Serine threonine-kinase MRCK beta	C	representative	0.999	0	78	0	19								A0A498LDK7	571	5				tr|A0A498M492|A0A498M492_LABRO Serine threonine-kinase MRCK beta OS=Labeo rohita OX=84645 GN=ROHU_028171 PE=3 SV=1	Labeo rohita
A0A498MFD7	RXN18082.1	Non-specific serine/threonine protein kinase (EC 2.7.11.1)	C	indistinguishable representative	0.999	0	43	0	14								A0A498LDK7	571	5				tr|A0A498MFD7|A0A498MFD7_LABRO Non-specific serine/threonine protein kinase OS=Labeo rohita OX=84645 GN=ROHU_007858 PE=3 SV=1	Labeo rohita
A0A498LDL2	RXN03415.1	Prolyl-tRNA synthetase associated domain-containing 1-like protein	C	canonical	1	0	18	0	7								A0A498LDL2	572	1				tr|A0A498LDL2|A0A498LDL2_LABRO Prolyl-tRNA synthetase associated domain-containing 1-like protein OS=Labeo rohita OX=84645 GN=ROHU_013434 PE=4 SV=1	Labeo rohita
A0A498LDL3	RXN03847.1	RFT1-like protein	C	canonical	0.998	0	50	0	6								A0A498LDL3	573	1				tr|A0A498LDL3|A0A498LDL3_LABRO RFT1-like protein OS=Labeo rohita OX=84645 GN=ROHU_035763 PE=4 SV=1	Labeo rohita
A0A498LDM1	RXN06419.1	ELFN1-like protein	C	weak	0.945	0	1	0	1								A0A498LDM1	574	2				tr|A0A498LDM1|A0A498LDM1_LABRO ELFN1-like protein OS=Labeo rohita OX=84645 GN=ROHU_012380 PE=4 SV=1	Labeo rohita
A0A498LDN7	RXN04634.1	Pleckstrin domain-containing 2	C	representative	0.956	0	3	0	2								A0A498LDN7	575	1				tr|A0A498LDN7|A0A498LDN7_LABRO Pleckstrin domain-containing 2 OS=Labeo rohita OX=84645 GN=ROHU_033988 PE=4 SV=1	Labeo rohita
A0A498LDN9	RXN06427.1	Proteoglycan 4-like isoform X1	C	weak	0.834	0	1	0	1								A0A498LDN9	576	1				tr|A0A498LDN9|A0A498LDN9_LABRO Proteoglycan 4-like isoform X1 OS=Labeo rohita OX=84645 GN=ROHU_012326 PE=4 SV=1	Labeo rohita
A0A498LDP8	RXN05523.1	Delta(24)-sterol reductase	C	canonical	0.999	0	54	0	6								A0A498LDP8	577	1				tr|A0A498LDP8|A0A498LDP8_LABRO Delta(24)-sterol reductase OS=Labeo rohita OX=84645 GN=ROHU_012681 PE=4 SV=1	Labeo rohita
A0A498LDQ3	RXN03455.1	Apoptosis regulator BAX-like protein	C	canonical	0.999	0	11	0	2								A0A498LDQ3	578	1				tr|A0A498LDQ3|A0A498LDQ3_LABRO Apoptosis regulator BAX-like protein OS=Labeo rohita OX=84645 GN=ROHU_013474 PE=4 SV=1	Labeo rohita
A0A498LDR7	RXN06380.1	Kinase D-interacting substrate of 220 kDa isoform X4	C	indistinguishable representative	0.996	0	6	0	4								A0A498LDR7	579	4				tr|A0A498LDR7|A0A498LDR7_LABRO Kinase D-interacting substrate of 220 kDa isoform X4 OS=Labeo rohita OX=84645 GN=ROHU_012412 PE=4 SV=1	Labeo rohita
A0A498LDR9		Zinc finger and BTB domain-containing 7B-like isoform X2	C	weak	0.881	0	1	0	1								A0A498LDR9	580	1				tr|A0A498LDR9|A0A498LDR9_LABRO Zinc finger and BTB domain-containing 7B-like isoform X2 OS=Labeo rohita OX=84645 GN=ROHU_035651 PE=4 SV=1	Labeo rohita
A0A498LDS3	RXN06418.1	Mitotic spindle assembly checkpoint MAD1	C	canonical	1	0	24	0	12								A0A498LDS3	581	2				tr|A0A498LDS3|A0A498LDS3_LABRO Mitotic spindle assembly checkpoint MAD1 OS=Labeo rohita OX=84645 GN=ROHU_012379 PE=4 SV=1	Labeo rohita
A0A498NBK4	RXN30560.1	Mitotic spindle assembly checkpoint MAD1	C	marginally distinguished	1	0	19	0	11								A0A498LDS3	581	2				tr|A0A498NBK4|A0A498NBK4_LABRO Mitotic spindle assembly checkpoint MAD1 OS=Labeo rohita OX=84645 GN=ROHU_017719 PE=4 SV=1	Labeo rohita
A0A498LDS4	RXN16166.1	Flightless-1-like protein	C	canonical	0.999	0	215	0	24								A0A498LDS4	582	1				tr|A0A498LDS4|A0A498LDS4_LABRO Flightless-1-like protein OS=Labeo rohita OX=84645 GN=ROHU_013504 PE=4 SV=1	Labeo rohita
A0A498LDT0	RXN06469.1	Neutrophil cytosol factor 4-like protein	C	canonical	0.999	0	4	0	2								A0A498LDT0	583	1				tr|A0A498LDT0|A0A498LDT0_LABRO Neutrophil cytosol factor 4-like protein OS=Labeo rohita OX=84645 GN=ROHU_012320 PE=4 SV=1	Labeo rohita
A0A498LDT5	RXN06332.1	EMILIN-1-like protein	C	canonical	1	0	855	0	61								A0A498LDT5	584	1				tr|A0A498LDT5|A0A498LDT5_LABRO EMILIN-1-like protein OS=Labeo rohita OX=84645 GN=ROHU_027317 PE=4 SV=1	Labeo rohita
A0A498LDT8	RXN05583.1	Cytoplasmic dynein 1 heavy chain 1	C	canonical	1	0	353	0	18								A0A498LDT8	585	1				tr|A0A498LDT8|A0A498LDT8_LABRO Cytoplasmic dynein 1 heavy chain 1 OS=Labeo rohita OX=84645 GN=ROHU_033326 PE=4 SV=1	Labeo rohita
A0A498LDM3	RXN06262.1	Hippocalcin 1	C	canonical	1	0	120	0	12								A0A498LDU4	586	6				tr|A0A498LDM3|A0A498LDM3_LABRO Hippocalcin 1 OS=Labeo rohita OX=84645 GN=ROHU_027249 PE=4 SV=1	Labeo rohita
A0A498LDU4	RXN16849.1	Visinin 1	C	canonical	1	0	287	0	26								A0A498LDU4	586	6				tr|A0A498LDU4|A0A498LDU4_LABRO Visinin 1 OS=Labeo rohita OX=84645 GN=ROHU_027326 PE=4 SV=1	Labeo rohita
A0A498LGU7	RXN05914.1	Neurocalcin-delta	C	canonical	1	0	114	0	10								A0A498LDU4	586	6				tr|A0A498LGU7|A0A498LGU7_LABRO Neurocalcin-delta OS=Labeo rohita OX=84645 GN=ROHU_033127 PE=4 SV=1	Labeo rohita
A0A498MR29	RXN26127.1	Hippocalcin 1	C	canonical	1	0	106	0	12								A0A498LDU4	586	6				tr|A0A498MR29|A0A498MR29_LABRO Hippocalcin 1 OS=Labeo rohita OX=84645 GN=ROHU_006799 PE=4 SV=1	Labeo rohita
A0A498NPW8	RXN29321.1	Visinin 1	C	canonical	1	0	280	0	24								A0A498LDU4	586	6				tr|A0A498NPW8|A0A498NPW8_LABRO Visinin 1 OS=Labeo rohita OX=84645 GN=ROHU_015265 PE=4 SV=1	Labeo rohita
A0A498P3S4	RXN38087.1	Visinin 1	C	canonical	1	0	30	0	3								A0A498LDU4	586	6				tr|A0A498P3S4|A0A498P3S4_LABRO Visinin 1 OS=Labeo rohita OX=84645 GN=ROHU_001452 PE=4 SV=1	Labeo rohita
A0A498LDV1	RXN03907.1	Diablo mitochondrial-like isoform X1	C	canonical	0.999	0	11	0	5								A0A498LDV1	587	1				tr|A0A498LDV1|A0A498LDV1_LABRO Diablo mitochondrial-like isoform X1 OS=Labeo rohita OX=84645 GN=ROHU_034231 PE=4 SV=1	Labeo rohita
A0A498LDV2	RXN06411.1	Tripartite motif-containing 2-like protein	C	canonical	0.999	0	126	0	22								A0A498LDV2	588	1				tr|A0A498LDV2|A0A498LDV2_LABRO Tripartite motif-containing 2-like protein OS=Labeo rohita OX=84645 GN=ROHU_012372 PE=4 SV=1	Labeo rohita
A0A498LDV6	RXN16919.1	Nucleo TPR-like isoform X1	C	canonical	0.999	0	173	0	38								A0A498LDV6	589	4				tr|A0A498LDV6|A0A498LDV6_LABRO Nucleo TPR-like isoform X1 OS=Labeo rohita OX=84645 GN=ROHU_035532 PE=4 SV=1	Labeo rohita
A0A498MDM9	RXN17196.1	Adaptin ear-binding coat-associated 2	C	representative	0.999	0	100	0	13								A0A498LDV6	589	4				tr|A0A498MDM9|A0A498MDM9_LABRO Adaptin ear-binding coat-associated 2 OS=Labeo rohita OX=84645 GN=ROHU_008109 PE=4 SV=1	Labeo rohita
A0A498LDW2	RXN06421.1	Lysosomal alpha-glucosidase-like protein	C	canonical	0.999	0	257	0	33								A0A498LDW2	590	1				tr|A0A498LDW2|A0A498LDW2_LABRO Lysosomal alpha-glucosidase-like protein OS=Labeo rohita OX=84645 GN=ROHU_012382 PE=3 SV=1	Labeo rohita
A0A498LDW4	RXN05136.1	Solute carrier organic anion transporter family member	C	canonical	0.999	0	18	0	7								A0A498LDW4	591	1				tr|A0A498LDW4|A0A498LDW4_LABRO Solute carrier organic anion transporter family member OS=Labeo rohita OX=84645 GN=ROHU_012779 PE=3 SV=1	Labeo rohita
A0A498LDW8	RXN06509.1	Autophagy protein 5	C	canonical	0.999	0	14	0	8								A0A498LDW8	592	1				tr|A0A498LDW8|A0A498LDW8_LABRO Autophagy protein 5 OS=Labeo rohita OX=84645 GN=ROHU_032804 PE=3 SV=1	Labeo rohita
A0A498LDX0	RXN03535.1	5-hydroxyisourate hydrolase-like protein	C	indistinguishable representative	0.999	0	6	0	3								A0A498LDX0	593	2				tr|A0A498LDX0|A0A498LDX0_LABRO 5-hydroxyisourate hydrolase-like protein OS=Labeo rohita OX=84645 GN=ROHU_013350 PE=4 SV=1	Labeo rohita
A0A498LDX7	RXN19950.1	Queuine tRNA-ribosyltransferase catalytic subunit 1 (EC 2.4.2.29) (Guanine insertion enzyme) (tRNA-guanine transglycosylase)	C	weak	0.815	0	1	0	1								A0A498LDX7	594	1				tr|A0A498LDX7|A0A498LDX7_LABRO Queuine tRNA-ribosyltransferase catalytic subunit 1 OS=Labeo rohita OX=84645 GN=QTRT1 PE=3 SV=1	Labeo rohita
A0A498LDX8		Protocadherin Fat 1-like protein	C	weak	0.99	0	1	0	1								A0A498LDX8	595	2				tr|A0A498LDX8|A0A498LDX8_LABRO Protocadherin Fat 1-like protein OS=Labeo rohita OX=84645 GN=ROHU_035683 PE=4 SV=1	Labeo rohita
A0A498LDZ2	RXN06519.1	Phosphomevalonate kinase (PMKase) (EC 2.7.4.2)	C	canonical	1	0	72	0	16								A0A498LDZ2	596	1				tr|A0A498LDZ2|A0A498LDZ2_LABRO Phosphomevalonate kinase OS=Labeo rohita OX=84645 GN=ROHU_006539 PE=4 SV=1	Labeo rohita
A0A498LDZ9	RXN06461.1	Structural maintenance of chromosomes 3	C	indistinguishable representative	1	0	303	0	33								A0A498LDZ9	597	2				tr|A0A498LDZ9|A0A498LDZ9_LABRO Structural maintenance of chromosomes 3 OS=Labeo rohita OX=84645 GN=ROHU_012348 PE=4 SV=1	Labeo rohita
A0A498LE08	RXN06471.1	85 88 kDa calcium-independent phospholipase A2 isoform X2	C	indistinguishable representative	0.993	0	11	0	4								A0A498LE08	598	2				tr|A0A498LE08|A0A498LE08_LABRO 85 88 kDa calcium-independent phospholipase A2 isoform X2 OS=Labeo rohita OX=84645 GN=ROHU_012358 PE=4 SV=1	Labeo rohita
A0A498LE09	RXN27523.1	Gamma-glutamylcyclotransferase-like protein	C	canonical	0.999	0	199	0	10								A0A498LE09	599	1				tr|A0A498LE09|A0A498LE09_LABRO Gamma-glutamylcyclotransferase-like protein OS=Labeo rohita OX=84645 GN=ROHU_012753 PE=4 SV=1	Labeo rohita
A0A498LE30	RXN06434.1	Parvalbumin-7 isoform X1	C	canonical	1	0	239	0	15								A0A498LE30	600	1				tr|A0A498LE30|A0A498LE30_LABRO Parvalbumin-7 isoform X1 OS=Labeo rohita OX=84645 GN=ROHU_012321 PE=3 SV=1	Labeo rohita
A0A498LE44	RXN05703.1	Putative cationic amino acid transporter	C	canonical	0.999	0	14	0	6								A0A498LE44	601	1				tr|A0A498LE44|A0A498LE44_LABRO Putative cationic amino acid transporter OS=Labeo rohita OX=84645 GN=ROHU_033198 PE=4 SV=1	Labeo rohita
A0A498LE50	RXN05713.1	Zinc finger GLIS1-like protein	C	canonical	0.999	0	19	0	7								A0A498LE50	602	1				tr|A0A498LE50|A0A498LE50_LABRO Zinc finger GLIS1-like protein OS=Labeo rohita OX=84645 GN=ROHU_033208 PE=4 SV=1	Labeo rohita
A0A498LE53	RXN28734.1	F-box only 50	C	canonical	1	0	222	0	13								A0A498LE53	603	2				tr|A0A498LE53|A0A498LE53_LABRO F-box only 50 OS=Labeo rohita OX=84645 GN=ROHU_005309 PE=4 SV=1	Labeo rohita
A0A498LL15	RXN07394.1	Lysosome-associated membrane glyco 2-like isoform X1	C	canonical	0.999	0	68	0	4								A0A498LE53	603	2				tr|A0A498LL15|A0A498LL15_LABRO Lysosome-associated membrane glyco 2-like isoform X1 OS=Labeo rohita OX=84645 GN=ROHU_032314 PE=3 SV=1	Labeo rohita
A0A498LE54	RXN06521.1	Myelin basic-like protein	C	canonical	1	0	496	0	27								A0A498LE54	604	2				tr|A0A498LE54|A0A498LE54_LABRO Myelin basic-like protein OS=Labeo rohita OX=84645 GN=ROHU_006541 PE=4 SV=1	Labeo rohita
A0A498NQU8	RXN34442.1	Myelin basic-like isoform X2	C	canonical	1	0	1060	0	30								A0A498LE54	604	2				tr|A0A498NQU8|A0A498NQU8_LABRO Myelin basic-like isoform X2 OS=Labeo rohita OX=84645 GN=ROHU_003990 PE=4 SV=1	Labeo rohita
A0A498LE68	RXN06510.1	Mediator of RNA polymerase II transcription subunit 18 (Mediator complex subunit 18)	C	weak	0.94	0	1	0	1								A0A498LE68	605	1				tr|A0A498LE68|A0A498LE68_LABRO Mediator of RNA polymerase II transcription subunit 18 OS=Labeo rohita OX=84645 GN=MED18 PE=3 SV=1	Labeo rohita
A0A498L7N6	RXN04108.1	Contactin-associated-like 2	C	canonical	0.999	0	30	0	7								A0A498LE71	606	7				tr|A0A498L7N6|A0A498L7N6_LABRO Contactin-associated-like 2 OS=Labeo rohita OX=84645 GN=ROHU_013103 PE=4 SV=1	Labeo rohita
A0A498LC46	RXN04913.1	Contactin-associated-like 4	C	canonical	0.999	0	9	0	4								A0A498LE71	606	7				tr|A0A498LC46|A0A498LC46_LABRO Contactin-associated-like 4 OS=Labeo rohita OX=84645 GN=ROHU_033656 PE=4 SV=1	Labeo rohita
A0A498LE71	RXN05266.1	Contactin-associated-like 2	C	canonical	0.999	0	109	0	25								A0A498LE71	606	7				tr|A0A498LE71|A0A498LE71_LABRO Contactin-associated-like 2 OS=Labeo rohita OX=84645 GN=ROHU_033496 PE=4 SV=1	Labeo rohita
A0A498LE76	RXN05743.1	Carbonic anhydrase-like protein	C	canonical	1	0	2965	0	90								A0A498LE76	607	5				tr|A0A498LE76|A0A498LE76_LABRO Carbonic anhydrase-like protein OS=Labeo rohita OX=84645 GN=ROHU_033238 PE=3 SV=1	Labeo rohita
A0A498M0C2	RXN12494.1	Carbonic anhydrase 7-like isoform X1	C	canonical	1	0	45	0	8								A0A498LE76	607	5				tr|A0A498M0C2|A0A498M0C2_LABRO Carbonic anhydrase 7-like isoform X1 OS=Labeo rohita OX=84645 GN=ROHU_010075 PE=3 SV=1	Labeo rohita
A0A498N2G0	RXN24696.1	Carbonic anhydrase 1	C	canonical	1	0	559	0	27								A0A498LE76	607	5				tr|A0A498N2G0|A0A498N2G0_LABRO Carbonic anhydrase 1 OS=Labeo rohita OX=84645 GN=ROHU_022108 PE=3 SV=1	Labeo rohita
A0A498LE78	RXN05276.1	Gamma-tubulin complex component 6	C	weak	0.833	0	1	0	1								A0A498LE78	608	1				tr|A0A498LE78|A0A498LE78_LABRO Gamma-tubulin complex component 6 OS=Labeo rohita OX=84645 GN=ROHU_033506 PE=4 SV=1	Labeo rohita
A0A498L3B6	RXN02679.1	Calcium-transporting ATPase (EC 7.2.2.10)	C	marginally distinguished	1	0	524	0	41								A0A498LE85	609	9				tr|A0A498L3B6|A0A498L3B6_LABRO Calcium-transporting ATPase OS=Labeo rohita OX=84645 GN=ROHU_034855 PE=3 SV=1	Labeo rohita
A0A498LE85	RXN06551.1	Calcium-transporting ATPase (EC 7.2.2.10)	C	canonical	1	0	926	0	62								A0A498LE85	609	9				tr|A0A498LE85|A0A498LE85_LABRO Calcium-transporting ATPase OS=Labeo rohita OX=84645 GN=ROHU_035519 PE=3 SV=1	Labeo rohita
A0A498MEC3	RXN17732.1	Calcium-transporting ATPase (EC 7.2.2.10)	C	indistinguishable representative	1	0	445	0	34								A0A498LE85	609	9				tr|A0A498MEC3|A0A498MEC3_LABRO Calcium-transporting ATPase OS=Labeo rohita OX=84645 GN=ROHU_026579 PE=3 SV=1	Labeo rohita
A0A498MRK1	RXN19635.1	Calcium-transporting ATPase (EC 7.2.2.10)	C	marginally distinguished	1	0	326	0	21								A0A498LE85	609	9				tr|A0A498MRK1|A0A498MRK1_LABRO Calcium-transporting ATPase OS=Labeo rohita OX=84645 GN=ROHU_007220 PE=3 SV=1	Labeo rohita
A0A498N497	RXN23567.1	Calcium-transporting ATPase (EC 7.2.2.10)	C	marginally distinguished	1	0	510	0	37								A0A498LE85	609	9				tr|A0A498N497|A0A498N497_LABRO Calcium-transporting ATPase OS=Labeo rohita OX=84645 GN=ROHU_022973 PE=3 SV=1	Labeo rohita
A0A498NJ58	RXN31952.1	Plasma membrane calcium-transporting ATPase 2 isoform X1	C	canonical	1	0	205	0	18								A0A498LE85	609	9				tr|A0A498NJ58|A0A498NJ58_LABRO Plasma membrane calcium-transporting ATPase 2 isoform X1 OS=Labeo rohita OX=84645 GN=ROHU_016587 PE=3 SV=1	Labeo rohita
A0A498NJB6	RXN31953.1	Calcium-transporting ATPase (EC 7.2.2.10)	C	canonical	1	0	462	0	37								A0A498LE85	609	9				tr|A0A498NJB6|A0A498NJB6_LABRO Calcium-transporting ATPase OS=Labeo rohita OX=84645 GN=ROHU_016588 PE=3 SV=1	Labeo rohita
A0A498LE89	RXN06530.1	Pleckstrin homology domain-containing family A member 6 isoform X7	C	canonical	0.998	0	25	0	9								A0A498LE89	610	1				tr|A0A498LE89|A0A498LE89_LABRO Pleckstrin homology domain-containing family A member 6 isoform X7 OS=Labeo rohita OX=84645 GN=ROHU_032764 PE=4 SV=1	Labeo rohita
A0A498LE94	RXN06609.1	Pleiotropic regulator 1	C	representative	1	0	45	0	10								A0A498LE94	611	2				tr|A0A498LE94|A0A498LE94_LABRO Pleiotropic regulator 1 OS=Labeo rohita OX=84645 GN=ROHU_032718 PE=4 SV=1	Labeo rohita
A0A498LE97	RXN05296.1	Chondroitin sulfate proteoglycan 4	C	canonical	0.999	0	211	0	46								A0A498LE97	612	1				tr|A0A498LE97|A0A498LE97_LABRO Chondroitin sulfate proteoglycan 4 OS=Labeo rohita OX=84645 GN=ROHU_035630 PE=4 SV=1	Labeo rohita
A0A498LEA0	RXN06540.1	Liprin-alpha-2-like isoform X1	C	canonical	0.998	0	2	0	2								A0A498LEA0	613	1				tr|A0A498LEA0|A0A498LEA0_LABRO Liprin-alpha-2-like isoform X1 OS=Labeo rohita OX=84645 GN=ROHU_032774 PE=4 SV=1	Labeo rohita
A0A498LEA2	RXN05773.1	M-striated muscle-like isoform X2	C	representative	1	0	2338	0	111								A0A498LEA2	614	2				tr|A0A498LEA2|A0A498LEA2_LABRO M-striated muscle-like isoform X2 OS=Labeo rohita OX=84645 GN=ROHU_033268 PE=4 SV=1	Labeo rohita
A0A498MP99	RXN21633.1	M-striated muscle-like isoform X2	C	marginally distinguished	1	0	2255	0	110								A0A498LEA2	614	2				tr|A0A498MP99|A0A498MP99_LABRO M-striated muscle-like isoform X2 OS=Labeo rohita OX=84645 GN=ROHU_024212 PE=4 SV=1	Labeo rohita
A0A498LEA7	RXN20104.1	Uncharacterized protein	C	canonical	0.998	0	9	0	3								A0A498LEA7	615	1				tr|A0A498LEA7|A0A498LEA7_LABRO Uncharacterized protein OS=Labeo rohita OX=84645 GN=ROHU_012715 PE=4 SV=1	Labeo rohita
A0A498LBV5	RXN05781.1	Macrophage mannose receptor 1-like protein	C	representative	1	0	103	0	25								A0A498LEA9	616	5				tr|A0A498LBV5|A0A498LBV5_LABRO Macrophage mannose receptor 1-like protein OS=Labeo rohita OX=84645 GN=ROHU_033276 PE=4 SV=1	Labeo rohita
A0A498LEA9	RXN05783.1	Macrophage mannose receptor 1-like protein	C	representative	1	0	96	0	26								A0A498LEA9	616	5				tr|A0A498LEA9|A0A498LEA9_LABRO Macrophage mannose receptor 1-like protein OS=Labeo rohita OX=84645 GN=ROHU_033278 PE=4 SV=1	Labeo rohita
A0A498LEB2		MICAL 2	C	weak	0.878	0	1	0	1								A0A498LEB2	617	2				tr|A0A498LEB2|A0A498LEB2_LABRO MICAL 2 OS=Labeo rohita OX=84645 GN=ROHU_012383 PE=4 SV=1	Labeo rohita
A0A498LEB7		FERM and PDZ domain-containing 4-like protein	C	weak	0.902	0	1	0	1								A0A498LEB7	618	2				tr|A0A498LEB7|A0A498LEB7_LABRO FERM and PDZ domain-containing 4-like protein OS=Labeo rohita OX=84645 GN=ROHU_033490 PE=4 SV=1	Labeo rohita
A0A498LEC0	RXN04097.1	Eukaryotic translation initiation factor 2 subunit 3	C	canonical	1	0	871	0	24								A0A498LEC0	619	2				tr|A0A498LEC0|A0A498LEC0_LABRO Eukaryotic translation initiation factor 2 subunit 3 OS=Labeo rohita OX=84645 GN=ROHU_013092 PE=4 SV=1	Labeo rohita
A0A498LLS6	RXN08503.1	Eukaryotic translation initiation factor 2 subunit 3	C	canonical	0.999	0	299	0	12								A0A498LEC0	619	2				tr|A0A498LLS6|A0A498LLS6_LABRO Eukaryotic translation initiation factor 2 subunit 3 OS=Labeo rohita OX=84645 GN=ROHU_031765 PE=4 SV=1	Labeo rohita
A0A498LED1	RXN04914.1	Uncharacterized protein	C	canonical	1	0	436	0	50								A0A498LED1	620	1				tr|A0A498LED1|A0A498LED1_LABRO Uncharacterized protein OS=Labeo rohita OX=84645 GN=ROHU_033657 PE=4 SV=1	Labeo rohita
A0A498LED4	RXN04107.1	Cullin-1	C	canonical	0.999	0	65	0	23								A0A498LED4	621	4				tr|A0A498LED4|A0A498LED4_LABRO Cullin-1 OS=Labeo rohita OX=84645 GN=ROHU_013102 PE=3 SV=1	Labeo rohita
A0A498LHS1	RXN05267.1	Cullin-1	C	representative	0.999	0	94	0	30								A0A498LED4	621	4				tr|A0A498LHS1|A0A498LHS1_LABRO Cullin-1 OS=Labeo rohita OX=84645 GN=ROHU_033497 PE=3 SV=1	Labeo rohita
A0A498LEF3		Structural maintenance of chromosomes 3	C	indistinguishable representative	0.999	0	79	0	18								A0A498LEF3	622	2				tr|A0A498LEF3|A0A498LEF3_LABRO Structural maintenance of chromosomes 3 OS=Labeo rohita OX=84645 GN=ROHU_012349 PE=4 SV=1	Labeo rohita
A0A498LEH0	RXN06621.1	FH2 domain-containing 1	C	indistinguishable representative	0.999	0	47	0	9								A0A498LEH0	623	2				tr|A0A498LEH0|A0A498LEH0_LABRO FH2 domain-containing 1 OS=Labeo rohita OX=84645 GN=ROHU_035516 PE=4 SV=1	Labeo rohita
A0A498L7Z4	RXN04399.1	Cdc42-interacting 4 isoform X1	C	canonical	0.999	0	233	0	17								A0A498LEH5	624	22				tr|A0A498L7Z4|A0A498L7Z4_LABRO Cdc42-interacting 4 isoform X1 OS=Labeo rohita OX=84645 GN=ROHU_034034 PE=4 SV=1	Labeo rohita
A0A498LEH5	RXN06610.1	Fibrinogen gamma chain-like protein	C	canonical	1	0	7756	0	177								A0A498LEH5	624	22				tr|A0A498LEH5|A0A498LEH5_LABRO Fibrinogen gamma chain-like protein OS=Labeo rohita OX=84645 GN=ROHU_029658 PE=4 SV=1	Labeo rohita
A0A498LVX8	RXN12609.1	Angiopoietin-related 7-like protein	C	canonical	0.999	0	138	0	7								A0A498LEH5	624	22				tr|A0A498LVX8|A0A498LVX8_LABRO Angiopoietin-related 7-like protein OS=Labeo rohita OX=84645 GN=ROHU_029410 PE=4 SV=1	Labeo rohita
A0A498LYU2	RXN12386.1	Fibrinogen C domain-containing 1-like protein	C	marginally distinguished	0.999	0	126	0	2								A0A498LEH5	624	22				tr|A0A498LYU2|A0A498LYU2_LABRO Fibrinogen C domain-containing 1-like protein OS=Labeo rohita OX=84645 GN=ROHU_029568 PE=4 SV=1	Labeo rohita
A0A498MFN8	RXN18633.1	Angiopoietin-related 1	C	indistinguishable representative	0.999	0	126	0	2								A0A498LEH5	624	22				tr|A0A498MFN8|A0A498MFN8_LABRO Angiopoietin-related 1 OS=Labeo rohita OX=84645 GN=ROHU_007693 PE=4 SV=1	Labeo rohita
A0A498MMR3	RXN22759.1	Vascular cell adhesion 1-like protein	C	canonical	1	0	304	0	27								A0A498LEH5	624	22				tr|A0A498MMR3|A0A498MMR3_LABRO Vascular cell adhesion 1-like protein OS=Labeo rohita OX=84645 GN=ROHU_023267 PE=4 SV=1	Labeo rohita
A0A498MQV4	RXN22760.1	Vascular cell adhesion 1-like protein	C	marginally distinguished	1	0	118	0	16								A0A498LEH5	624	22				tr|A0A498MQV4|A0A498MQV4_LABRO Vascular cell adhesion 1-like protein OS=Labeo rohita OX=84645 GN=ROHU_023268 PE=4 SV=1	Labeo rohita
A0A498NIW3	RXN31765.1	Hemicentin-1-like isoform X2	C	marginally distinguished	0.999	0	17	0	3								A0A498LEH5	624	22				tr|A0A498NIW3|A0A498NIW3_LABRO Hemicentin-1-like isoform X2 OS=Labeo rohita OX=84645 GN=ROHU_016641 PE=4 SV=1	Labeo rohita
A0A498NX59		Intercellular adhesion molecule 1-like protein	C	marginally distinguished	0.999	0	86	0	8								A0A498LEH5	624	22				tr|A0A498NX59|A0A498NX59_LABRO Intercellular adhesion molecule 1-like protein OS=Labeo rohita OX=84645 GN=ROHU_002871 PE=4 SV=1	Labeo rohita
A0A498LEI0	RXN08046.1	Urocanate hydratase	C	canonical	0.999	0	344	0	33								A0A498LEI0	625	15				tr|A0A498LEI0|A0A498LEI0_LABRO Urocanate hydratase OS=Labeo rohita OX=84645 GN=ROHU_011732 PE=3 SV=1	Labeo rohita
A0A498LJH4	RXN21644.1	Leucine-rich repeat and coiled-coil domain-containing 1-like protein	C	canonical	0.999	0	13	0	5								A0A498LEI0	625	15				tr|A0A498LJH4|A0A498LJH4_LABRO Leucine-rich repeat and coiled-coil domain-containing 1-like protein OS=Labeo rohita OX=84645 GN=ROHU_024223 PE=3 SV=1	Labeo rohita
A0A498LRR2	RXN11138.1	6-phosphofructo-2-kinase fructose-2,6-bisphosphatase 2-like isoform X1	C	canonical	0.999	0	50	0	10								A0A498LEI0	625	15				tr|A0A498LRR2|A0A498LRR2_LABRO 6-phosphofructo-2-kinase fructose-2,6-bisphosphatase 2-like isoform X1 OS=Labeo rohita OX=84645 GN=ROHU_030238 PE=4 SV=1	Labeo rohita
A0A498MR47	RXN24048.1	Transcription factor E2F4	C	marginally distinguished	0.999	0	9	0	3								A0A498LEI0	625	15				tr|A0A498MR47|A0A498MR47_LABRO Transcription factor E2F4 OS=Labeo rohita OX=84645 GN=ROHU_022483 PE=3 SV=1	Labeo rohita
A0A498N2C8	RXN26911.1	Inter-alpha-trypsin inhibitor heavy chain H6-like protein	C	marginally distinguished	0.999	0	69	0	14								A0A498LEI0	625	15				tr|A0A498N2C8|A0A498N2C8_LABRO Inter-alpha-trypsin inhibitor heavy chain H6-like protein OS=Labeo rohita OX=84645 GN=ROHU_020364 PE=4 SV=1	Labeo rohita
A0A498NQW9		6-phosphofructo-2-kinase fructose-2,6-bisphosphatase 4-like isoform X1	C	marginally distinguished	0.999	0	41	0	5								A0A498LEI0	625	15				tr|A0A498NQW9|A0A498NQW9_LABRO 6-phosphofructo-2-kinase fructose-2,6-bisphosphatase 4-like isoform X1 OS=Labeo rohita OX=84645 GN=ROHU_015036 PE=4 SV=1	Labeo rohita
A0A498NRX6	RXN34294.1	6-phosphofructo-2-kinase fructose-2,6-bisphosphatase 2-like isoform X1	C	canonical	0.999	0	51	0	13								A0A498LEI0	625	15				tr|A0A498NRX6|A0A498NRX6_LABRO 6-phosphofructo-2-kinase fructose-2,6-bisphosphatase 2-like isoform X1 OS=Labeo rohita OX=84645 GN=ROHU_015017 PE=4 SV=1	Labeo rohita
A0A498NXE3	RXN36299.1	6-phosphofructo-2-kinase fructose-2,6-bisphosphatase-like isoform X3	C	representative	0.999	0	104	0	14								A0A498LEI0	625	15				tr|A0A498NXE3|A0A498NXE3_LABRO 6-phosphofructo-2-kinase fructose-2,6-bisphosphatase-like isoform X3 OS=Labeo rohita OX=84645 GN=ROHU_035922 PE=4 SV=1	Labeo rohita
A0A498LEK0	RXN04177.1	U3 small nucleolar ribonucleoprotein protein MPP10	C	canonical	0.995	0	6	0	3								A0A498LEK0	626	1				tr|A0A498LEK0|A0A498LEK0_LABRO U3 small nucleolar ribonucleoprotein protein MPP10 OS=Labeo rohita OX=84645 GN=ROHU_035738 PE=3 SV=1	Labeo rohita
A0A498LEL3	RXN03805.1	Caveolin-3-like protein	C	canonical	0.999	0	16	0	6								A0A498LEL3	627	1				tr|A0A498LEL3|A0A498LEL3_LABRO Caveolin-3-like protein OS=Labeo rohita OX=84645 GN=ROHU_013255 PE=3 SV=1	Labeo rohita
A0A498LEL9		Integrator complex subunit 3	C	canonical	0.998	0	2	0	2								A0A498LEL9	628	1				tr|A0A498LEL9|A0A498LEL9_LABRO Integrator complex subunit 3 OS=Labeo rohita OX=84645 GN=ROHU_012305 PE=4 SV=1	Labeo rohita
A0A498LEM0	RXN05014.1	Zona pellucida sperm-binding 3-like protein	C	indistinguishable representative	0.998	0	10	0	2								A0A498LEM0	629	2				tr|A0A498LEM0|A0A498LEM0_LABRO Zona pellucida sperm-binding 3-like protein OS=Labeo rohita OX=84645 GN=ROHU_033617 PE=4 SV=1	Labeo rohita
A0A498LEM6	RXN06532.1	Epiphycan-like protein	C	canonical	0.999	0	15	0	5								A0A498LEM6	630	1				tr|A0A498LEM6|A0A498LEM6_LABRO Epiphycan-like protein OS=Labeo rohita OX=84645 GN=ROHU_032766 PE=4 SV=1	Labeo rohita
A0A498LEN6	RXN05034.1	ATP synthase subunit mitochondrial	C	representative	0.999	0	8	0	2								A0A498LEN6	631	1				tr|A0A498LEN6|A0A498LEN6_LABRO ATP synthase subunit mitochondrial OS=Labeo rohita OX=84645 GN=ROHU_033637 PE=4 SV=1	Labeo rohita
A0A498LEN8	RXN05436.1	Sorting nexin-27-like isoform X1	C	indistinguishable representative	0.999	0	16	0	5								A0A498LEN8	632	2				tr|A0A498LEN8|A0A498LEN8_LABRO Sorting nexin-27-like isoform X1 OS=Labeo rohita OX=84645 GN=ROHU_033452 PE=4 SV=1	Labeo rohita
A0A498LEP1	RXN06738.1	UPF0587 protein C1orf123-like	C	representative	1	0	84	0	8								A0A498LEP1	633	2				tr|A0A498LEP1|A0A498LEP1_LABRO UPF0587 protein C1orf123-like OS=Labeo rohita OX=84645 GN=ROHU_032639 PE=4 SV=1	Labeo rohita
A0A498LEP4	RXN06759.1	Zinc finger and BTB domain-containing 18 isoform X5	C	indistinguishable representative	0.999	0	5	0	5								A0A498LEP4	634	2				tr|A0A498LEP4|A0A498LEP4_LABRO Zinc finger and BTB domain-containing 18 isoform X5 OS=Labeo rohita OX=84645 GN=ROHU_032660 PE=4 SV=1	Labeo rohita
A0A498LEP8	RXN05446.1	Pre-B-cell leukemia transcription factor-interacting 1-like isoform X1	C	indistinguishable representative	0.999	0	86	0	10								A0A498LEP8	635	2				tr|A0A498LEP8|A0A498LEP8_LABRO Pre-B-cell leukemia transcription factor-interacting 1-like isoform X1 OS=Labeo rohita OX=84645 GN=ROHU_033462 PE=4 SV=1	Labeo rohita
A0A498LEP9	RXN06552.1	Phosphatidylinositol 4-phosphate 3-kinase C2 domain-containing subunit beta	C	weak	0.872	0	2	0	1								A0A498LEP9	636	2				tr|A0A498LEP9|A0A498LEP9_LABRO Phosphatidylinositol 4-phosphate 3-kinase C2 domain-containing subunit beta OS=Labeo rohita OX=84645 GN=ROHU_035146 PE=3 SV=1	Labeo rohita
A0A498LEQ6	RXN06701.1	Serine threonine-kinase LMTK2-like protein	C	indistinguishable representative	0.999	0	2	0	2								A0A498LEQ6	637	2				tr|A0A498LEQ6|A0A498LEQ6_LABRO Serine threonine-kinase LMTK2-like protein OS=Labeo rohita OX=84645 GN=ROHU_012298 PE=4 SV=1	Labeo rohita
A0A498LES0	RXN03865.1	DnaJ-like protein	C	canonical	0.998	0	4	0	2								A0A498LES0	638	1				tr|A0A498LES0|A0A498LES0_LABRO DnaJ-like protein OS=Labeo rohita OX=84645 GN=ROHU_034322 PE=3 SV=1	Labeo rohita
A0A498LES4	RXN20233.1	Replication A 14 kDa subunit	C	canonical	1	0	32	0	7								A0A498LES4	639	1				tr|A0A498LES4|A0A498LES4_LABRO Replication A 14 kDa subunit OS=Labeo rohita OX=84645 GN=ROHU_012318 PE=4 SV=1	Labeo rohita
A0A498LES5	RXN05963.1	Anoctamin	C	canonical	0.999	0	9	0	4								A0A498LES5	640	1				tr|A0A498LES5|A0A498LES5_LABRO Anoctamin OS=Labeo rohita OX=84645 GN=ROHU_012529 PE=3 SV=1	Labeo rohita
A0A498LET1	RXN03875.1	Zinc finger protein 800-like	C	indistinguishable representative	0.97	0	2	0	2								A0A498LET1	641	2				tr|A0A498LET1|A0A498LET1_LABRO Zinc finger protein 800-like OS=Labeo rohita OX=84645 GN=ROHU_013170 PE=4 SV=1	Labeo rohita
A0A498LET6		Plakophilin-1-like protein	C	weak	0.883	0	1	0	1								A0A498LET6	642	2				tr|A0A498LET6|A0A498LET6_LABRO Plakophilin-1-like protein OS=Labeo rohita OX=84645 GN=ROHU_033345 PE=4 SV=1	Labeo rohita
A0A498LAH8	RXN03886.1	Nucleoredoxin	C	representative	1	0	103	0	5								A0A498LEU3	643	3				tr|A0A498LAH8|A0A498LAH8_LABRO Nucleoredoxin OS=Labeo rohita OX=84645 GN=ROHU_034210 PE=4 SV=1	Labeo rohita
A0A498LEU3	RXN03885.1	Thioredoxin domain-containing 17	C	canonical	1	0	263	0	18								A0A498LEU3	643	3				tr|A0A498LEU3|A0A498LEU3_LABRO Thioredoxin domain-containing 17 OS=Labeo rohita OX=84645 GN=ROHU_034209 PE=4 SV=1	Labeo rohita
A0A498LEU5	RXN06730.1	Lipase maturation factor	C	representative	0.995	0	3	0	2								A0A498LEU5	644	3				tr|A0A498LEU5|A0A498LEU5_LABRO Lipase maturation factor OS=Labeo rohita OX=84645 GN=ROHU_032631 PE=3 SV=1	Labeo rohita
A0A498LEV1		Transcription initiation factor TFIID subunit 6	C	representative	0.994	0	3	0	3								A0A498LEV1	645	2				tr|A0A498LEV1|A0A498LEV1_LABRO Transcription initiation factor TFIID subunit 6 OS=Labeo rohita OX=84645 GN=ROHU_012090 PE=4 SV=1	Labeo rohita
A0A498LEV3	RXN38197.1	Minor histocompatibility antigen H13 isoform X2	C	canonical	0.999	0	72	0	9								A0A498LEV3	646	2				tr|A0A498LEV3|A0A498LEV3_LABRO Minor histocompatibility antigen H13 isoform X2 OS=Labeo rohita OX=84645 GN=ROHU_001341 PE=4 SV=1	Labeo rohita
A0A498LEV7	RXN06808.1	Zona pellucida sperm-binding 3-like protein	C	canonical	1	0	64	0	12								A0A498LEV7	647	2				tr|A0A498LEV7|A0A498LEV7_LABRO Zona pellucida sperm-binding 3-like protein OS=Labeo rohita OX=84645 GN=ROHU_012089 PE=4 SV=1	Labeo rohita
A0A498LEW1	RXN05114.1	Activating signal cointegrator 1 complex subunit 3	C	canonical	0.999	0	15	0	11								A0A498LEW1	648	1				tr|A0A498LEW1|A0A498LEW1_LABRO Activating signal cointegrator 1 complex subunit 3 OS=Labeo rohita OX=84645 GN=ROHU_033603 PE=4 SV=1	Labeo rohita
A0A498LEW8		PAX3-and PAX7-binding 1	C	weak	0.858	0	1	0	1								A0A498LEW8	649	2				tr|A0A498LEW8|A0A498LEW8_LABRO PAX3-and PAX7-binding 1 OS=Labeo rohita OX=84645 GN=ROHU_012110 PE=4 SV=1	Labeo rohita
A0A498LEX4	RXN23139.1	Large neutral amino acids transporter small subunit 4-like isoform X1	C	weak	0.897	0	1	0	1								A0A498LEX4	650	1				tr|A0A498LEX4|A0A498LEX4_LABRO Large neutral amino acids transporter small subunit 4-like isoform X1 OS=Labeo rohita OX=84645 GN=ROHU_006446 PE=3 SV=1	Labeo rohita
A0A498LEX8	RXN05134.1	ATP-binding cassette sub-family D member 2	C	canonical	0.999	0	23	0	9								A0A498LEX8	651	2				tr|A0A498LEX8|A0A498LEX8_LABRO ATP-binding cassette sub-family D member 2 OS=Labeo rohita OX=84645 GN=ROHU_012777 PE=4 SV=1	Labeo rohita
A0A498LRH6	RXN10312.1	ATP-binding cassette sub-family D member 1-like protein	C	canonical	0.999	0	29	0	9								A0A498LEX8	651	2				tr|A0A498LRH6|A0A498LRH6_LABRO ATP-binding cassette sub-family D member 1-like protein OS=Labeo rohita OX=84645 GN=ROHU_037374 PE=4 SV=1	Labeo rohita
A0A498LEY1	RXN05526.1	Barttin-like protein	C	canonical	0.997	0	3	0	2								A0A498LEY1	652	1				tr|A0A498LEY1|A0A498LEY1_LABRO Barttin-like protein OS=Labeo rohita OX=84645 GN=ROHU_012684 PE=4 SV=1	Labeo rohita
A0A498LEY4	RXN06838.1	Vacuolar-sorting-associated 36	C	indistinguishable representative	0.999	0	63	0	12								A0A498LEY4	653	2				tr|A0A498LEY4|A0A498LEY4_LABRO Vacuolar-sorting-associated 36 OS=Labeo rohita OX=84645 GN=ROHU_012119 PE=4 SV=1	Labeo rohita
A0A498LEY7	RXN06849.1	Importin subunit alpha	C	indistinguishable representative	1	0	183	0	31								A0A498LEY7	654	2				tr|A0A498LEY7|A0A498LEY7_LABRO Importin subunit alpha OS=Labeo rohita OX=84645 GN=ROHU_012130 PE=3 SV=1	Labeo rohita
A0A498LEY8	RXN03935.1	C-factor-like protein	C	canonical	1	0	1025	0	83								A0A498LEY8	655	4				tr|A0A498LEY8|A0A498LEY8_LABRO C-factor-like protein OS=Labeo rohita OX=84645 GN=ROHU_034259 PE=4 SV=1	Labeo rohita
A0A498MJI4	RXN19953.1	C-factor-like protein	C	canonical	1	0	161	0	22								A0A498LEY8	655	4				tr|A0A498MJI4|A0A498MJI4_LABRO C-factor-like protein OS=Labeo rohita OX=84645 GN=ROHU_007170 PE=4 SV=1	Labeo rohita
A0A498MKE1	RXN19952.1	C-factor-like protein	C	marginally distinguished	1	0	840	0	63								A0A498LEY8	655	4				tr|A0A498MKE1|A0A498MKE1_LABRO C-factor-like protein OS=Labeo rohita OX=84645 GN=ROHU_007169 PE=4 SV=1	Labeo rohita
A0A498LEZ0	RXN06033.1	Cytotoxin 7-like protein	C	canonical	1	0	154	0	10								A0A498LEZ0	656	1				tr|A0A498LEZ0|A0A498LEZ0_LABRO Cytotoxin 7-like protein OS=Labeo rohita OX=84645 GN=ROHU_033086 PE=4 SV=1	Labeo rohita
A0A498LF01		Beta-1,4 N-acetylgalactosaminyltransferase 2-like protein	C	indistinguishable representative	0.988	0	2	0	2								A0A498LF01	657	3				tr|A0A498LF01|A0A498LF01_LABRO Beta-1,4 N-acetylgalactosaminyltransferase 2-like protein OS=Labeo rohita OX=84645 GN=ROHU_035602 PE=4 SV=1	Labeo rohita
A0A498LF02	RXN27158.1	Superoxide dismutase [Cu-Zn] (EC 1.15.1.1)	C	canonical	1	0	1912	0	55								A0A498LF02	658	1				tr|A0A498LF02|A0A498LF02_LABRO Superoxide dismutase [Cu-Zn] OS=Labeo rohita OX=84645 GN=ROHU_012139 PE=3 SV=1	Labeo rohita
A0A498LF10	RXN04317.1	Reversion-inducing cysteine-rich protein	C	canonical	0.999	0	15	0	7								A0A498LF10	659	1				tr|A0A498LF10|A0A498LF10_LABRO Reversion-inducing cysteine-rich protein OS=Labeo rohita OX=84645 GN=ROHU_035720 PE=4 SV=1	Labeo rohita
A0A498LF12	RXN06879.1	Delta(14)-sterol reductase-like protein	C	canonical	0.999	0	45	0	9								A0A498LF12	660	1				tr|A0A498LF12|A0A498LF12_LABRO Delta(14)-sterol reductase-like protein OS=Labeo rohita OX=84645 GN=ROHU_012160 PE=4 SV=1	Labeo rohita
A0A498LF16	RXN06878.1	Vacuolar sorting-associated 51-like protein	C	canonical	0.999	0	42	0	8								A0A498LF16	661	1				tr|A0A498LF16|A0A498LF16_LABRO Vacuolar sorting-associated 51-like protein OS=Labeo rohita OX=84645 GN=ROHU_012159 PE=4 SV=1	Labeo rohita
A0A498LF40	RXN27142.1	Fibrinogen 1	C	canonical	1	0	4	0	3								A0A498LF40	662	1				tr|A0A498LF40|A0A498LF40_LABRO Fibrinogen 1 OS=Labeo rohita OX=84645 GN=ROHU_012121 PE=4 SV=1	Labeo rohita
A0A498LF46	RXN04357.1	Stabilin-1-like protein	C	representative	1	0	147	0	35								A0A498LF46	663	2				tr|A0A498LF46|A0A498LF46_LABRO Stabilin-1-like protein OS=Labeo rohita OX=84645 GN=ROHU_012998 PE=4 SV=1	Labeo rohita
A0A498LF50	RXN06103.1	Cerebral dopamine neurotrophic factor-like protein	C	canonical	0.998	0	3	0	2								A0A498LF50	664	1				tr|A0A498LF50|A0A498LF50_LABRO Cerebral dopamine neurotrophic factor-like protein OS=Labeo rohita OX=84645 GN=ROHU_033072 PE=4 SV=1	Labeo rohita
A0A498LF62	RXN06123.1	NADPH--cytochrome P450 reductase (CPR) (P450R) (EC 1.6.2.4)	C	representative	1	0	695	0	46								A0A498LF62	665	5				tr|A0A498LF62|A0A498LF62_LABRO NADPH--cytochrome P450 reductase OS=Labeo rohita OX=84645 GN=POR PE=3 SV=1	Labeo rohita
A0A498LYP2	RXN13658.1	NADPH--cytochrome P450 reductase isoform X1	C	marginally distinguished	1	0	524	0	37								A0A498LF62	665	5				tr|A0A498LYP2|A0A498LYP2_LABRO NADPH--cytochrome P450 reductase isoform X1 OS=Labeo rohita OX=84645 GN=ROHU_009527 PE=4 SV=1	Labeo rohita
A0A498MJX6	RXN20510.1	NADPH--cytochrome P450 reductase (CPR) (P450R) (EC 1.6.2.4)	C	indistinguishable representative	1	0	164	0	12								A0A498LF62	665	5				tr|A0A498MJX6|A0A498MJX6_LABRO NADPH--cytochrome P450 reductase OS=Labeo rohita OX=84645 GN=POR PE=3 SV=1	Labeo rohita
A0A498LF63		Tumor necrosis factor alpha-induced 2-like protein	C	representative	0.998	0	15	0	4								A0A498LF63	666	2				tr|A0A498LF63|A0A498LF63_LABRO Tumor necrosis factor alpha-induced 2-like protein OS=Labeo rohita OX=84645 GN=ROHU_033532 PE=4 SV=1	Labeo rohita
A0A498N6P0	RXN28730.1	Tumor necrosis factor alpha-induced 2-like protein	C	marginally distinguished	0.998	0	15	0	3								A0A498LF63	666	2				tr|A0A498N6P0|A0A498N6P0_LABRO Tumor necrosis factor alpha-induced 2-like protein OS=Labeo rohita OX=84645 GN=ROHU_005305 PE=4 SV=1	Labeo rohita
A0A498LF75	RXN20946.1	Lysyl oxidase-like protein	C	canonical	0.999	0	15	0	7								A0A498LF75	667	1				tr|A0A498LF75|A0A498LF75_LABRO Lysyl oxidase-like protein OS=Labeo rohita OX=84645 GN=ROHU_035541 PE=4 SV=1	Labeo rohita
A0A498LF81	RXN06959.1	Methyltransferase 6	C	representative	0.996	0	3	0	2								A0A498LF81	668	1				tr|A0A498LF81|A0A498LF81_LABRO Methyltransferase 6 OS=Labeo rohita OX=84645 GN=ROHU_032575 PE=4 SV=1	Labeo rohita
A0A498LF93	RXN05304.1	Uncharacterized protein	C	canonical	0.999	0	79	0	15								A0A498LF93	669	3				tr|A0A498LF93|A0A498LF93_LABRO Uncharacterized protein OS=Labeo rohita OX=84645 GN=ROHU_012713 PE=4 SV=1	Labeo rohita
A0A498LIJ5	RXN05305.1	Uncharacterized protein	C	marginally distinguished	0.999	0	39	0	6								A0A498LF93	669	3				tr|A0A498LIJ5|A0A498LIJ5_LABRO Uncharacterized protein OS=Labeo rohita OX=84645 GN=ROHU_012714 PE=4 SV=1	Labeo rohita
A0A498LF96		Ciliary neurotrophic factor-like protein	C	weak	0.983	0	1	0	1								A0A498LF96	670	1				tr|A0A498LF96|A0A498LF96_LABRO Ciliary neurotrophic factor-like protein OS=Labeo rohita OX=84645 GN=ROHU_012928 PE=4 SV=1	Labeo rohita
A0A498LFA2		GTPase IMAP family member 7-like protein	C	weak	0.892	0	1	0	1								A0A498LFA2	671	2				tr|A0A498LFA2|A0A498LFA2_LABRO GTPase IMAP family member 7-like protein OS=Labeo rohita OX=84645 GN=ROHU_012643 PE=3 SV=1	Labeo rohita
A0A498LFA9		Mediator of RNA polymerase II transcription subunit 23 isoform X2	C	weak	0.998	0	1	0	1								A0A498LFA9	672	1				tr|A0A498LFA9|A0A498LFA9_LABRO Mediator of RNA polymerase II transcription subunit 23 isoform X2 OS=Labeo rohita OX=84645 GN=ROHU_012441 PE=4 SV=1	Labeo rohita
A0A498LFB3	RXN27143.1	Phosphatidylinositol 3,4,5-trisphosphate 3-phosphatase TPTE2-like protein	C	canonical	0.999	0	17	0	4								A0A498LFB3	673	1				tr|A0A498LFB3|A0A498LFB3_LABRO Phosphatidylinositol 3,4,5-trisphosphate 3-phosphatase TPTE2-like protein OS=Labeo rohita OX=84645 GN=ROHU_012122 PE=4 SV=1	Labeo rohita
A0A498LFB4	RXN06692.1	Ankyrin repeat and SAM domain-containing 4B-like protein	C	weak	0.999	0	2	0	1								A0A498LFB4	674	1				tr|A0A498LFB4|A0A498LFB4_LABRO Ankyrin repeat and SAM domain-containing 4B-like protein OS=Labeo rohita OX=84645 GN=ROHU_012289 PE=4 SV=1	Labeo rohita
A0A498LFB8	RXN05656.1	Endonuclease domain-containing 1-like protein	C	canonical	0.999	0	34	0	11								A0A498LFB8	675	1				tr|A0A498LFB8|A0A498LFB8_LABRO Endonuclease domain-containing 1-like protein OS=Labeo rohita OX=84645 GN=ROHU_012591 PE=4 SV=1	Labeo rohita
A0A498LFC4	RXN06702.1	Tectonin beta-propeller repeat-containing 1-like protein	C	indistinguishable representative	0.988	0	10	0	2								A0A498LFC4	676	3				tr|A0A498LFC4|A0A498LFC4_LABRO Tectonin beta-propeller repeat-containing 1-like protein OS=Labeo rohita OX=84645 GN=ROHU_012299 PE=4 SV=1	Labeo rohita
A0A498LFC6		Zinc finger protein 384 isoform X1	C	weak	0.882	0	1	0	1								A0A498LFC6	677	1				tr|A0A498LFC6|A0A498LFC6_LABRO Zinc finger protein 384 isoform X1 OS=Labeo rohita OX=84645 GN=ROHU_012601 PE=4 SV=1	Labeo rohita
A0A498LFC9	RXN05354.1	Alpha-kinase 3-like protein	C	weak	0.909	0	2	0	1								A0A498LFC9	678	1				tr|A0A498LFC9|A0A498LFC9_LABRO Alpha-kinase 3-like protein OS=Labeo rohita OX=84645 GN=ROHU_033370 PE=4 SV=1	Labeo rohita
A0A498LFD3	RXN05676.1	PRA1 family protein	C	canonical	0.999	0	10	0	3								A0A498LFD3	679	1				tr|A0A498LFD3|A0A498LFD3_LABRO PRA1 family protein OS=Labeo rohita OX=84645 GN=ROHU_012611 PE=3 SV=1	Labeo rohita
A0A498LFE2	RXN06871.1	Four and a half LIM domains 1-like protein	C	canonical	1	0	342	0	33								A0A498LFE2	680	1				tr|A0A498LFE2|A0A498LFE2_LABRO Four and a half LIM domains 1-like protein OS=Labeo rohita OX=84645 GN=ROHU_012152 PE=4 SV=1	Labeo rohita
A0A498LFF1	RXN06881.1	39S ribosomal mitochondrial	C	weak	0.986	0	1	0	1								A0A498LFF1	681	1				tr|A0A498LFF1|A0A498LFF1_LABRO 39S ribosomal mitochondrial OS=Labeo rohita OX=84645 GN=ROHU_012162 PE=4 SV=1	Labeo rohita
A0A498LFG1	RXN06223.1	Interferon-inducible GTPase 5-like protein	C	indistinguishable representative	0.999	0	7	0	6								A0A498LFG1	682	2				tr|A0A498LFG1|A0A498LFG1_LABRO Interferon-inducible GTPase 5-like protein OS=Labeo rohita OX=84645 GN=ROHU_035535 PE=4 SV=1	Labeo rohita
A0A498LFG4	RXN04135.1	WD repeat-containing protein 76	C	canonical	1	0	23	0	10								A0A498LFG4	683	1				tr|A0A498LFG4|A0A498LFG4_LABRO WD repeat-containing protein 76 OS=Labeo rohita OX=84645 GN=ROHU_034136 PE=3 SV=1	Labeo rohita
A0A498LFG5	RXN07048.1	Janus kinase and microtubule-interacting 3 isoform X1	C	weak	0.955	0	1	0	1								A0A498LFG5	684	1				tr|A0A498LFG5|A0A498LFG5_LABRO Janus kinase and microtubule-interacting 3 isoform X1 OS=Labeo rohita OX=84645 GN=ROHU_035491 PE=4 SV=1	Labeo rohita
A0A498LFH3	RXN04145.1	SAFB-like transcription modulator isoform X1	C	canonical	0.999	0	17	0	6								A0A498LFH3	685	1				tr|A0A498LFH3|A0A498LFH3_LABRO SAFB-like transcription modulator isoform X1 OS=Labeo rohita OX=84645 GN=ROHU_034146 PE=4 SV=1	Labeo rohita
A0A498LFI5	RXN30783.1	Stromal cell-derived factor 2 1	C	canonical	1	0	57	0	7								A0A498LFI5	686	1				tr|A0A498LFI5|A0A498LFI5_LABRO Stromal cell-derived factor 2 1 OS=Labeo rohita OX=84645 GN=ROHU_017453 PE=4 SV=1	Labeo rohita
A0A498LFI9	RXN07019.1	Eukaryotic translation initiation factor 3 subunit E (eIF3e) (Eukaryotic translation initiation factor 3 subunit 6)	C	canonical	1	0	457	0	35								A0A498LFI9	687	3				tr|A0A498LFI9|A0A498LFI9_LABRO Eukaryotic translation initiation factor 3 subunit E OS=Labeo rohita OX=84645 GN=EIF3E PE=3 SV=1	Labeo rohita
A0A498N9X4	RXN28524.1	Eukaryotic translation initiation factor 3 subunit E (eIF3e) (Eukaryotic translation initiation factor 3 subunit 6)	C	indistinguishable representative	1	0	343	0	29								A0A498LFI9	687	3				tr|A0A498N9X4|A0A498N9X4_LABRO Eukaryotic translation initiation factor 3 subunit E OS=Labeo rohita OX=84645 GN=EIF3E PE=3 SV=1	Labeo rohita
A0A498LFJ1	RXN06921.1	Bis(5-adenosyl)-triphosphatase	C	canonical	0.984	0	4	0	2								A0A498LFJ1	688	1				tr|A0A498LFJ1|A0A498LFJ1_LABRO Bis(5-adenosyl)-triphosphatase OS=Labeo rohita OX=84645 GN=ROHU_012202 PE=4 SV=1	Labeo rohita
A0A498LFJ7		Forkhead box protein O1-A-like	C	weak	0.984	0	1	0	1								A0A498LFJ7	689	2				tr|A0A498LFJ7|A0A498LFJ7_LABRO Forkhead box protein O1-A-like OS=Labeo rohita OX=84645 GN=ROHU_035174 PE=4 SV=1	Labeo rohita
A0A498LFK0	RXN05424.1	Structural maintenance of chromosomes 3-like protein	C	indistinguishable representative	0.999	0	5	0	2								A0A498LFK0	690	2				tr|A0A498LFK0|A0A498LFK0_LABRO Structural maintenance of chromosomes 3-like protein OS=Labeo rohita OX=84645 GN=ROHU_033440 PE=4 SV=1	Labeo rohita
A0A498LFK1	RXN07088.1	Prostaglandin F2 receptor negative regulator-like protein	C	canonical	1	0	54	0	19								A0A498LFK1	691	3				tr|A0A498LFK1|A0A498LFK1_LABRO Prostaglandin F2 receptor negative regulator-like protein OS=Labeo rohita OX=84645 GN=ROHU_010535 PE=4 SV=1	Labeo rohita
A0A498LFK2	RXN06263.1	Apolipoprotein B-100-like protein	C	canonical	1	0	4111	0	250								A0A498LFK2	692	3				tr|A0A498LFK2|A0A498LFK2_LABRO Apolipoprotein B-100-like protein OS=Labeo rohita OX=84645 GN=ROHU_027250 PE=4 SV=1	Labeo rohita
A0A498MA02	RXN17160.1	Apolipoprotein B-100	C	indistinguishable representative	0.999	0	117	0	59								A0A498LFK2	692	3				tr|A0A498MA02|A0A498MA02_LABRO Apolipoprotein B-100 OS=Labeo rohita OX=84645 GN=ROHU_027073 PE=4 SV=1	Labeo rohita
A0A498LFK5	RXN05756.1	Retinol dehydrogenase 10	C	weak	0.918	0	1	0	1								A0A498LFK5	693	2				tr|A0A498LFK5|A0A498LFK5_LABRO Retinol dehydrogenase 10 OS=Labeo rohita OX=84645 GN=ROHU_033251 PE=3 SV=1	Labeo rohita
A0A498LFK8	RXN06782.1	Eukaryotic translation initiation factor 4E	C	canonical	0.999	0	37	0	8								A0A498LFK8	694	3				tr|A0A498LFK8|A0A498LFK8_LABRO Eukaryotic translation initiation factor 4E OS=Labeo rohita OX=84645 GN=ROHU_032683 PE=3 SV=1	Labeo rohita
A0A498MXZ5	RXN26818.1	Eukaryotic translation initiation factor 4E-1A	C	canonical	0.999	0	48	0	6								A0A498LFK8	694	3				tr|A0A498MXZ5|A0A498MXZ5_LABRO Eukaryotic translation initiation factor 4E-1A OS=Labeo rohita OX=84645 GN=ROHU_005550 PE=3 SV=1	Labeo rohita
A0A498LFL4	RXN21626.1	Transcription elongation factor A 1-like protein	C	canonical	0.999	0	31	0	15								A0A498LFL4	695	3				tr|A0A498LFL4|A0A498LFL4_LABRO Transcription elongation factor A 1-like protein OS=Labeo rohita OX=84645 GN=ROHU_024205 PE=4 SV=1	Labeo rohita
A0A498LS47	RXN11239.1	Transcription elongation factor A 2-like protein	C	canonical	1	0	33	0	9								A0A498LFL4	695	3				tr|A0A498LS47|A0A498LS47_LABRO Transcription elongation factor A 2-like protein OS=Labeo rohita OX=84645 GN=ROHU_030185 PE=4 SV=1	Labeo rohita
A0A498LFM0	RXN06792.1	NDRG2	C	canonical	1	0	454	0	21								A0A498LFM0	696	1				tr|A0A498LFM0|A0A498LFM0_LABRO NDRG2 OS=Labeo rohita OX=84645 GN=ROHU_032693 PE=4 SV=1	Labeo rohita
A0A498LBX4	RXN05809.1	Disks large-associated 1 isoform X1	C	marginally distinguished	0.99	0	5	0	3								A0A498LFM1	697	8				tr|A0A498LBX4|A0A498LBX4_LABRO Disks large-associated 1 isoform X1 OS=Labeo rohita OX=84645 GN=ROHU_035574 PE=4 SV=1	Labeo rohita
A0A498LFM1	RXN16791.1	ATP-dependent RNA helicase DDX1	C	canonical	1	0	2500	0	232								A0A498LFM1	697	8				tr|A0A498LFM1|A0A498LFM1_LABRO ATP-dependent RNA helicase DDX1 OS=Labeo rohita OX=84645 GN=ROHU_027268 PE=4 SV=1	Labeo rohita
A0A498N905	RXN28232.1	Disks large-associated 1-like isoform X1	C	marginally distinguished	1	0	8	0	4								A0A498LFM1	697	8				tr|A0A498N905|A0A498N905_LABRO Disks large-associated 1-like isoform X1 OS=Labeo rohita OX=84645 GN=ROHU_019434 PE=4 SV=1	Labeo rohita
A0A498NI43	RXN33077.1	Periplakin isoform X1	C	canonical	1	0	800	0	102								A0A498LFM1	697	8				tr|A0A498NI43|A0A498NI43_LABRO Periplakin isoform X1 OS=Labeo rohita OX=84645 GN=ROHU_015831 PE=4 SV=1	Labeo rohita
A0A498NQF7		Disks large-associated 4-like protein	C	marginally distinguished	0.996	0	3	0	2								A0A498LFM1	697	8				tr|A0A498NQF7|A0A498NQF7_LABRO Disks large-associated 4-like protein OS=Labeo rohita OX=84645 GN=ROHU_015015 PE=4 SV=1	Labeo rohita
A0A498LFM5	RXN07108.1	Acyl--binding	C	canonical	1	0	186	0	16								A0A498LFM5	698	1				tr|A0A498LFM5|A0A498LFM5_LABRO Acyl--binding OS=Labeo rohita OX=84645 GN=ROHU_032498 PE=4 SV=1	Labeo rohita
A0A498LFM9	RXN06961.1	Pleckstrin homology domain-containing family F member 2	C	canonical	0.998	0	16	0	5								A0A498LFM9	699	1				tr|A0A498LFM9|A0A498LFM9_LABRO Pleckstrin homology domain-containing family F member 2 OS=Labeo rohita OX=84645 GN=ROHU_032577 PE=4 SV=1	Labeo rohita
A0A498LFN2	RXN07069.1	Phosphatase 1F-like protein	C	canonical	0.999	0	143	0	14								A0A498LFN2	700	1				tr|A0A498LFN2|A0A498LFN2_LABRO Phosphatase 1F-like protein OS=Labeo rohita OX=84645 GN=ROHU_032459 PE=3 SV=1	Labeo rohita
A0A498LFN9		Replication factor C subunit 5	C	indistinguishable representative	1	0	69	0	17								A0A498LFN9	701	2				tr|A0A498LFN9|A0A498LFN9_LABRO Replication factor C subunit 5 OS=Labeo rohita OX=84645 GN=ROHU_032469 PE=4 SV=1	Labeo rohita
A0A498LFQ2		Rho GTPase-activating 31-like protein	C	weak	0.98	0	2	0	1								A0A498LFQ2	702	4				tr|A0A498LFQ2|A0A498LFQ2_LABRO Rho GTPase-activating 31-like protein OS=Labeo rohita OX=84645 GN=ROHU_032626 PE=4 SV=1	Labeo rohita
A0A498LFQ3	RXN11131.1	THO complex subunit 7-like protein	C	canonical	0.998	0	6	0	4								A0A498LFQ3	703	1				tr|A0A498LFQ3|A0A498LFQ3_LABRO THO complex subunit 7-like protein OS=Labeo rohita OX=84645 GN=ROHU_013080 PE=4 SV=1	Labeo rohita
A0A498LFQ4	RXN05806.1	Elongation of very long chain fatty acids protein (EC 2.3.1.199) (Very-long-chain 3-oxoacyl-CoA synthase)	C	canonical	0.998	0	8	0	3								A0A498LFQ4	704	1				tr|A0A498LFQ4|A0A498LFQ4_LABRO Elongation of very long chain fatty acids protein OS=Labeo rohita OX=84645 GN=ROHU_035571 PE=3 SV=1	Labeo rohita
A0A498LFQ9	RXN06323.1	Myomegalin-like isoform X4	C	indistinguishable representative	0.996	0	6	0	4								A0A498LFQ9	705	2				tr|A0A498LFQ9|A0A498LFQ9_LABRO Myomegalin-like isoform X4 OS=Labeo rohita OX=84645 GN=ROHU_032923 PE=4 SV=1	Labeo rohita
A0A498LFR4	RXN07020.1	ER membrane complex subunit 2	C	canonical	1	0	90	0	14								A0A498LFR4	706	1				tr|A0A498LFR4|A0A498LFR4_LABRO ER membrane complex subunit 2 OS=Labeo rohita OX=84645 GN=ROHU_012068 PE=4 SV=1	Labeo rohita
A0A498LFT0	RXN16850.1	Splicing factor 3B subunit 6	C	canonical	0.999	0	42	0	4								A0A498LFT0	707	1				tr|A0A498LFT0|A0A498LFT0_LABRO Splicing factor 3B subunit 6 OS=Labeo rohita OX=84645 GN=ROHU_027327 PE=4 SV=1	Labeo rohita
A0A498LFT2	RXN07011.1	Extracellular calcium-sensing receptor	C	canonical	0.999	0	368	0	33								A0A498LFT2	708	1				tr|A0A498LFT2|A0A498LFT2_LABRO Extracellular calcium-sensing receptor OS=Labeo rohita OX=84645 GN=ROHU_032627 PE=3 SV=1	Labeo rohita
A0A498LFT5	RXN07040.1	Glutaredoxin-3	C	canonical	1	0	5514	0	397								A0A498LFT5	709	22				tr|A0A498LFT5|A0A498LFT5_LABRO Glutaredoxin-3 OS=Labeo rohita OX=84645 GN=ROHU_012058 PE=4 SV=1	Labeo rohita
A0A498M6S1	RXN16331.1	Cathepsin S-like protein	C	marginally distinguished	1	0	24	0	6								A0A498LFT5	709	22				tr|A0A498M6S1|A0A498M6S1_LABRO Cathepsin S-like protein OS=Labeo rohita OX=84645 GN=ROHU_008437 PE=3 SV=1	Labeo rohita
A0A498N7C2	RXN30339.1	Cathepsin S-like protein	C	canonical	1	0	103	0	16								A0A498LFT5	709	22				tr|A0A498N7C2|A0A498N7C2_LABRO Cathepsin S-like protein OS=Labeo rohita OX=84645 GN=ROHU_004935 PE=3 SV=1	Labeo rohita
A0A498NB38	RXN30341.1	Cathepsin S-like protein	C	canonical	1	0	176	0	17								A0A498LFT5	709	22				tr|A0A498NB38|A0A498NB38_LABRO Cathepsin S-like protein OS=Labeo rohita OX=84645 GN=ROHU_004937 PE=3 SV=1	Labeo rohita
A0A498ND92	RXN30342.1	Cathepsin K-like protein	C	canonical	1	0	235	0	23								A0A498LFT5	709	22				tr|A0A498ND92|A0A498ND92_LABRO Cathepsin K-like protein OS=Labeo rohita OX=84645 GN=ROHU_004938 PE=3 SV=1	Labeo rohita
A0A498NEI5	RXN30336.1	Cathepsin S-like protein	C	canonical	1	0	240	0	21								A0A498LFT5	709	22				tr|A0A498NEI5|A0A498NEI5_LABRO Cathepsin S-like protein OS=Labeo rohita OX=84645 GN=ROHU_004932 PE=3 SV=1	Labeo rohita
A0A498NIR6	RXN31728.1	Cathepsin S-like protein	C	canonical	1	0	271	0	21								A0A498LFT5	709	22				tr|A0A498NIR6|A0A498NIR6_LABRO Cathepsin S-like protein OS=Labeo rohita OX=84645 GN=ROHU_016845 PE=3 SV=1	Labeo rohita
A0A498NIS1	RXN31725.1	Cathepsin S-like protein	C	representative	1	0	463	0	35								A0A498LFT5	709	22				tr|A0A498NIS1|A0A498NIS1_LABRO Cathepsin S-like protein OS=Labeo rohita OX=84645 GN=ROHU_016842 PE=3 SV=1	Labeo rohita
A0A498NMF1		Cathepsin S-like protein	C	canonical	0.999	0	85	0	6								A0A498LFT5	709	22				tr|A0A498NMF1|A0A498NMF1_LABRO Cathepsin S-like protein OS=Labeo rohita OX=84645 GN=ROHU_004417 PE=3 SV=1	Labeo rohita
A0A498P129	RXN38312.1	Cathepsin S-like protein	C	representative	1	0	134	0	12								A0A498LFT5	709	22				tr|A0A498P129|A0A498P129_LABRO Cathepsin S-like protein OS=Labeo rohita OX=84645 GN=ROHU_001233 PE=3 SV=1	Labeo rohita
A0A498P471	RXN38334.1	Cathepsin S-like protein	C	marginally distinguished	1	0	489	0	36								A0A498LFT5	709	22				tr|A0A498P471|A0A498P471_LABRO Cathepsin S-like protein OS=Labeo rohita OX=84645 GN=ROHU_001210 PE=3 SV=1	Labeo rohita
A0A498LFU5	RXN07050.1	Guanine nucleotide-binding subunit beta 1 isoform X3	C	representative	0.999	0	10	0	5								A0A498LFU5	710	2				tr|A0A498LFU5|A0A498LFU5_LABRO Guanine nucleotide-binding subunit beta 1 isoform X3 OS=Labeo rohita OX=84645 GN=ROHU_032440 PE=4 SV=1	Labeo rohita
A0A498L917	RXN04628.1	Kinesin KIF1A isoform X1	C	canonical	0.999	0	85	0	19								A0A498LFU9	711	11				tr|A0A498L917|A0A498L917_LABRO Kinesin KIF1A isoform X1 OS=Labeo rohita OX=84645 GN=ROHU_033982 PE=3 SV=1	Labeo rohita
A0A498LFU9	RXN04627.1	Espin	C	canonical	0.999	0	95	0	18								A0A498LFU9	711	11				tr|A0A498LFU9|A0A498LFU9_LABRO Espin OS=Labeo rohita OX=84645 GN=ROHU_033981 PE=4 SV=1	Labeo rohita
A0A498LM25	RXN08862.1	Kinesin KIF13B isoform X4	C	canonical	0.999	0	36	0	11								A0A498LFU9	711	11				tr|A0A498LM25|A0A498LM25_LABRO Kinesin KIF13B isoform X4 OS=Labeo rohita OX=84645 GN=ROHU_011401 PE=3 SV=1	Labeo rohita
A0A498MDU7	RXN17266.1	Kinesin KIF1A isoform X3	C	canonical	0.999	0	84	0	18								A0A498LFU9	711	11				tr|A0A498MDU7|A0A498MDU7_LABRO Kinesin KIF1A isoform X3 OS=Labeo rohita OX=84645 GN=ROHU_008056 PE=3 SV=1	Labeo rohita
A0A498LFV0	RXN06872.1	Fibroblast growth factor (FGF)	C	weak	0.97	0	1	0	1								A0A498LFV0	712	1				tr|A0A498LFV0|A0A498LFV0_LABRO Fibroblast growth factor OS=Labeo rohita OX=84645 GN=ROHU_012153 PE=3 SV=1	Labeo rohita
A0A498LFV9	RXN07188.1	Pre-mRNA-processing factor 40-like protein	C	canonical	0.998	0	13	0	7								A0A498LFV9	713	1				tr|A0A498LFV9|A0A498LFV9_LABRO Pre-mRNA-processing factor 40-like protein OS=Labeo rohita OX=84645 GN=ROHU_035490 PE=4 SV=1	Labeo rohita
A0A498LFW0	RXN06882.1	40S ribosomal protein S30	C	representative	0.999	0	23	0	2								A0A498LFW0	714	1				tr|A0A498LFW0|A0A498LFW0_LABRO 40S ribosomal protein S30 OS=Labeo rohita OX=84645 GN=ROHU_012163 PE=3 SV=1	Labeo rohita
A0A498LFX2	RXN27595.1	Mis18-alpha-like protein	C	canonical	1	0	27	0	8								A0A498LFX2	715	1				tr|A0A498LFX2|A0A498LFX2_LABRO Mis18-alpha-like protein OS=Labeo rohita OX=84645 GN=ROHU_019963 PE=4 SV=1	Labeo rohita
A0A498LFX6		Nitric oxide synthase (EC 1.14.13.39)	C	indistinguishable representative	0.999	0	44	0	17								A0A498LFX6	716	3				tr|A0A498LFX6|A0A498LFX6_LABRO Nitric oxide synthase OS=Labeo rohita OX=84645 GN=ROHU_032470 PE=3 SV=1	Labeo rohita
A0A498LFZ1		Leukocyte elastase inhibitor-like protein	C	representative	0.997	0	24	0	3								A0A498LFZ1	717	3				tr|A0A498LFZ1|A0A498LFZ1_LABRO Leukocyte elastase inhibitor-like protein OS=Labeo rohita OX=84645 GN=ROHU_033317 PE=3 SV=1	Labeo rohita
A0A498LFZ3	RXN04325.1	Collagen alpha-1(XXI) chain-like protein	C	canonical	1	0	12	0	5								A0A498LFZ3	718	1				tr|A0A498LFZ3|A0A498LFZ3_LABRO Collagen alpha-1(XXI) chain-like protein OS=Labeo rohita OX=84645 GN=ROHU_034051 PE=4 SV=1	Labeo rohita
A0A498LG03	RXN07238.1	Alpha-2-antiplasmin-like protein	C	canonical	1	0	211	0	23								A0A498LG03	719	1				tr|A0A498LG03|A0A498LG03_LABRO Alpha-2-antiplasmin-like protein OS=Labeo rohita OX=84645 GN=ROHU_011953 PE=3 SV=1	Labeo rohita
A0A498LG30	RXN07101.1	Macrophage receptor MARCO-like protein	C	canonical	0.999	0	10	0	3								A0A498LG30	720	1				tr|A0A498LG30|A0A498LG30_LABRO Macrophage receptor MARCO-like protein OS=Labeo rohita OX=84645 GN=ROHU_032491 PE=4 SV=1	Labeo rohita
A0A498LG34	RXN05966.1	CCR4-NOT transcription complex subunit 10 isoform X1	C	canonical	0.999	0	60	0	22								A0A498LG34	721	1				tr|A0A498LG34|A0A498LG34_LABRO CCR4-NOT transcription complex subunit 10 isoform X1 OS=Labeo rohita OX=84645 GN=ROHU_012532 PE=4 SV=1	Labeo rohita
A0A498LG38	RXN07278.1	Rap1 GTPase-activating 2-like isoform X3	C	weak	0.998	0	1	0	1								A0A498LG38	722	1				tr|A0A498LG38|A0A498LG38_LABRO Rap1 GTPase-activating 2-like isoform X3 OS=Labeo rohita OX=84645 GN=ROHU_011993 PE=4 SV=1	Labeo rohita
A0A498LG47	RXN04385.1	Cullin-2	C	representative	0.999	0	36	0	12								A0A498LG47	723	2				tr|A0A498LG47|A0A498LG47_LABRO Cullin-2 OS=Labeo rohita OX=84645 GN=ROHU_013026 PE=3 SV=1	Labeo rohita
A0A498LG48	RXN07121.1	RNA-binding 45	C	representative	0.996	0	3	0	2								A0A498LG48	724	1				tr|A0A498LG48|A0A498LG48_LABRO RNA-binding 45 OS=Labeo rohita OX=84645 GN=ROHU_011647 PE=4 SV=1	Labeo rohita
A0A498LG54	RXN07298.1	Gastrotropin-like protein	C	canonical	1	0	82	0	14								A0A498LG54	725	1				tr|A0A498LG54|A0A498LG54_LABRO Gastrotropin-like protein OS=Labeo rohita OX=84645 GN=ROHU_003058 PE=4 SV=1	Labeo rohita
A0A498LG55	RXN04395.1	Retinol dehydrogenase 8-like protein	C	canonical	0.999	0	57	0	13								A0A498LG55	726	1				tr|A0A498LG55|A0A498LG55_LABRO Retinol dehydrogenase 8-like protein OS=Labeo rohita OX=84645 GN=ROHU_034030 PE=3 SV=1	Labeo rohita
A0A498LG57	RXN07131.1	Lunapark-A-like protein	C	canonical	0.999	0	61	0	10								A0A498LG57	727	3				tr|A0A498LG57|A0A498LG57_LABRO Lunapark-A-like protein OS=Labeo rohita OX=84645 GN=ROHU_032521 PE=4 SV=1	Labeo rohita
A0A498NNC2	RXN33502.1	Lunapark-B isoform X1	C	canonical	0.999	0	34	0	6								A0A498LG57	727	3				tr|A0A498NNC2|A0A498NNC2_LABRO Lunapark-B isoform X1 OS=Labeo rohita OX=84645 GN=ROHU_015562 PE=4 SV=1	Labeo rohita
A0A498LG62	RXN04405.1	Suppressor of SWI4 1-like protein	C	weak	0.976	0	1	0	1								A0A498LG62	728	1				tr|A0A498LG62|A0A498LG62_LABRO Suppressor of SWI4 1-like protein OS=Labeo rohita OX=84645 GN=ROHU_035712 PE=3 SV=1	Labeo rohita
A0A498LA35	RXN05038.1	Alpha-1,4 glucan phosphorylase (EC 2.4.1.1)	C	canonical	1	0	3131	0	136								A0A498LG69	729	6				tr|A0A498LA35|A0A498LA35_LABRO Alpha-1,4 glucan phosphorylase OS=Labeo rohita OX=84645 GN=ROHU_030594 PE=3 SV=1	Labeo rohita
A0A498LG69	RXN07318.1	Alpha-1,4 glucan phosphorylase (EC 2.4.1.1)	C	canonical	1	0	7221	0	158								A0A498LG69	729	6				tr|A0A498LG69|A0A498LG69_LABRO Alpha-1,4 glucan phosphorylase OS=Labeo rohita OX=84645 GN=ROHU_012033 PE=3 SV=1	Labeo rohita
A0A498MJP2	RXN21519.1	Alpha-1,4 glucan phosphorylase (EC 2.4.1.1)	C	canonical	1	0	5448	0	146								A0A498LG69	729	6				tr|A0A498MJP2|A0A498MJP2_LABRO Alpha-1,4 glucan phosphorylase OS=Labeo rohita OX=84645 GN=ROHU_024098 PE=3 SV=1	Labeo rohita
A0A498NMA7	RXN32657.1	Golgin subfamily A member 1-like isoform X2	C	canonical	0.999	0	9	0	3								A0A498LG69	729	6				tr|A0A498NMA7|A0A498NMA7_LABRO Golgin subfamily A member 1-like isoform X2 OS=Labeo rohita OX=84645 GN=ROHU_016099 PE=4 SV=1	Labeo rohita
A0A498P430	RXN38294.1	Alpha-1,4 glucan phosphorylase (EC 2.4.1.1)	C	canonical	1	0	3148	0	105								A0A498LG69	729	6				tr|A0A498P430|A0A498P430_LABRO Alpha-1,4 glucan phosphorylase OS=Labeo rohita OX=84645 GN=ROHU_001261 PE=3 SV=1	Labeo rohita
A0A498LG70	RXN05664.1	COP9 signalosome complex subunit 7a-like protein	C	canonical	0.999	0	247	0	13								A0A498LG70	730	1				tr|A0A498LG70|A0A498LG70_LABRO COP9 signalosome complex subunit 7a-like protein OS=Labeo rohita OX=84645 GN=ROHU_012599 PE=4 SV=1	Labeo rohita
A0A498LG78	RXN06016.1	Aspartate beta-hydroxylase domain-containing 2	C	indistinguishable representative	0.999	0	33	0	9								A0A498LG78	731	2				tr|A0A498LG78|A0A498LG78_LABRO Aspartate beta-hydroxylase domain-containing 2 OS=Labeo rohita OX=84645 GN=ROHU_012497 PE=4 SV=1	Labeo rohita
A0A498LGA4		Claudin	C	weak	0.987	0	1	0	1								A0A498LGA4	732	1				tr|A0A498LGA4|A0A498LGA4_LABRO Claudin OS=Labeo rohita OX=84645 GN=ROHU_033199 PE=3 SV=1	Labeo rohita
A0A498LGB0		U7 snRNA-associated Sm LSm11	C	weak	0.984	0	1	0	1								A0A498LGB0	733	1				tr|A0A498LGB0|A0A498LGB0_LABRO U7 snRNA-associated Sm LSm11 OS=Labeo rohita OX=84645 GN=ROHU_023620 PE=4 SV=1	Labeo rohita
A0A498LGC2	RXN05724.1	Target of EGR1 1	C	canonical	0.999	0	7	0	4								A0A498LGC2	734	1				tr|A0A498LGC2|A0A498LGC2_LABRO Target of EGR1 1 OS=Labeo rohita OX=84645 GN=ROHU_033219 PE=4 SV=1	Labeo rohita
A0A498LGC3	RXN04465.1	Polypeptide N-acetylgalactosaminyltransferase (EC 2.4.1.-) (Protein-UDP acetylgalactosaminyltransferase)	C	canonical	0.996	0	7	0	5								A0A498LGC3	735	1				tr|A0A498LGC3|A0A498LGC3_LABRO Polypeptide N-acetylgalactosaminyltransferase OS=Labeo rohita OX=84645 GN=ROHU_012956 PE=3 SV=1	Labeo rohita
A0A498LGC6		Solute carrier organic anion transporter family member	C	canonical	0.998	0	6	0	2								A0A498LGC6	736	1				tr|A0A498LGC6|A0A498LGC6_LABRO Solute carrier organic anion transporter family member OS=Labeo rohita OX=84645 GN=ROHU_011955 PE=4 SV=1	Labeo rohita
A0A498LGD0	RXN05734.1	UPF0489 C5orf22-like protein	C	canonical	0.999	0	13	0	6								A0A498LGD0	737	1				tr|A0A498LGD0|A0A498LGD0_LABRO UPF0489 C5orf22-like protein OS=Labeo rohita OX=84645 GN=ROHU_033229 PE=4 SV=1	Labeo rohita
A0A498LGD4		Thioredoxin domain-containing 15	C	weak	0.754	0	1	0	1								A0A498LGD4	738	1				tr|A0A498LGD4|A0A498LGD4_LABRO Thioredoxin domain-containing 15 OS=Labeo rohita OX=84645 GN=ROHU_008517 PE=4 SV=1	Labeo rohita
A0A498LGE3		Fatty acid hydroxylase domain-containing 2	C	weak	0.949	0	1	0	1								A0A498LGE3	739	2				tr|A0A498LGE3|A0A498LGE3_LABRO Fatty acid hydroxylase domain-containing 2 OS=Labeo rohita OX=84645 GN=ROHU_033740 PE=3 SV=1	Labeo rohita
A0A498LGE4		GDNF family receptor alpha-2-like protein	C	weak	0.971	0	2	0	1								A0A498LGE4	740	1				tr|A0A498LGE4|A0A498LGE4_LABRO GDNF family receptor alpha-2-like protein OS=Labeo rohita OX=84645 GN=ROHU_034017 PE=4 SV=1	Labeo rohita
A0A498LGG2	RXN07270.1	Methionine adenosyltransferase 2 subunit beta (Methionine adenosyltransferase II beta)	C	canonical	0.999	0	118	0	15								A0A498LGG2	741	1				tr|A0A498LGG2|A0A498LGG2_LABRO Methionine adenosyltransferase 2 subunit beta OS=Labeo rohita OX=84645 GN=ROHU_011985 PE=3 SV=1	Labeo rohita
A0A498LGG4	RXN05774.1	EMILIN-2-like protein	C	indistinguishable representative	0.999	0	73	0	25								A0A498LGG4	742	2				tr|A0A498LGG4|A0A498LGG4_LABRO EMILIN-2-like protein OS=Labeo rohita OX=84645 GN=ROHU_033269 PE=4 SV=1	Labeo rohita
A0A498LGH0	RXN07399.1	NADH dehydrogenase [ubiquinone] 1 alpha subcomplex subunit 1	C	weak	0.989	0	15	0	1								A0A498LGH0	743	1				tr|A0A498LGH0|A0A498LGH0_LABRO NADH dehydrogenase [ubiquinone] 1 alpha subcomplex subunit 1 OS=Labeo rohita OX=84645 GN=ROHU_032319 PE=4 SV=1	Labeo rohita
A0A498LGH4	RXN07022.1	Transcription and mRNA export factor ENY2 (Enhancer of yellow 2 transcription factor homolog)	C	canonical	1	0	3	0	3								A0A498LGH4	744	1				tr|A0A498LGH4|A0A498LGH4_LABRO Transcription and mRNA export factor ENY2 OS=Labeo rohita OX=84645 GN=ENY2 PE=3 SV=1	Labeo rohita
A0A498LGI3	RXN05794.1	Mammalian ependymin-related 1-like protein	C	indistinguishable representative	0.999	0	40	0	6								A0A498LGI3	745	2				tr|A0A498LGI3|A0A498LGI3_LABRO Mammalian ependymin-related 1-like protein OS=Labeo rohita OX=84645 GN=ROHU_033289 PE=4 SV=1	Labeo rohita
A0A498LGI8	RXN07261.1	CCR4-NOT transcription complex subunit 6-like protein	C	canonical	0.999	0	12	0	4								A0A498LGI8	746	2				tr|A0A498LGI8|A0A498LGI8_LABRO CCR4-NOT transcription complex subunit 6-like protein OS=Labeo rohita OX=84645 GN=ROHU_011976 PE=4 SV=1	Labeo rohita
A0A498LGJ3	RXN07300.1	Solute carrier family 23 member 1	C	weak	0.985	0	2	0	1								A0A498LGJ3	747	2				tr|A0A498LGJ3|A0A498LGJ3_LABRO Solute carrier family 23 member 1 OS=Labeo rohita OX=84645 GN=ROHU_012015 PE=4 SV=1	Labeo rohita
A0A498LGJ7	RXN07271.1	Cysteine-rich and transmembrane domain-containing 1-like protein	C	representative	0.998	0	4	0	2								A0A498LGJ7	748	1				tr|A0A498LGJ7|A0A498LGJ7_LABRO Cysteine-rich and transmembrane domain-containing 1-like protein OS=Labeo rohita OX=84645 GN=ROHU_011986 PE=4 SV=1	Labeo rohita
A0A498LGJ8	RXN04535.1	Hemoglobin subunit beta-like protein	C	canonical	1	0	3	0	2								A0A498LGJ8	749	1				tr|A0A498LGJ8|A0A498LGJ8_LABRO Hemoglobin subunit beta-like protein OS=Labeo rohita OX=84645 GN=ROHU_033889 PE=3 SV=1	Labeo rohita
A0A498LGK0	RXN07429.1	Uncharacterized protein	C	representative	0.999	0	11	0	4								A0A498LGK0	750	2				tr|A0A498LGK0|A0A498LGK0_LABRO Uncharacterized protein OS=Labeo rohita OX=84645 GN=ROHU_004732 PE=4 SV=1	Labeo rohita
A0A498LGK2	RXN07310.1	SH2 domain-containing 4A-like isoform X1	C	canonical	0.999	0	5	0	4								A0A498LGK2	751	1				tr|A0A498LGK2|A0A498LGK2_LABRO SH2 domain-containing 4A-like isoform X1 OS=Labeo rohita OX=84645 GN=ROHU_012025 PE=4 SV=1	Labeo rohita
A0A498LGK3	RXN06146.1	Protein yippee-like	C	indistinguishable representative	0.983	0	6	0	2								A0A498LGK3	752	2				tr|A0A498LGK3|A0A498LGK3_LABRO Protein yippee-like OS=Labeo rohita OX=84645 GN=ROHU_012424 PE=3 SV=1	Labeo rohita
A0A498LGK7	RXN04545.1	ATP synthase mitochondrial F1 complex assembly factor 2	C	canonical	0.999	0	20	0	7								A0A498LGK7	753	1				tr|A0A498LGK7|A0A498LGK7_LABRO ATP synthase mitochondrial F1 complex assembly factor 2 OS=Labeo rohita OX=84645 GN=ROHU_033899 PE=4 SV=1	Labeo rohita
A0A498LGK9	RXN07439.1	Conserved oligomeric Golgi complex subunit 7	C	indistinguishable representative	0.955	0	3	0	2								A0A498LGK9	754	2				tr|A0A498LGK9|A0A498LGK9_LABRO Conserved oligomeric Golgi complex subunit 7 OS=Labeo rohita OX=84645 GN=ROHU_032359 PE=4 SV=1	Labeo rohita
A0A498LGM2	RXN06166.1	Band 2	C	canonical	0.999	0	26	0	3								A0A498LGM2	755	1				tr|A0A498LGM2|A0A498LGM2_LABRO Band 2 OS=Labeo rohita OX=84645 GN=ROHU_012444 PE=4 SV=1	Labeo rohita
A0A498LFH6	RXN07058.1	Transcriptional activator Pur-beta	C	canonical	1	0	528	0	27								A0A498LGN8	756	5				tr|A0A498LFH6|A0A498LFH6_LABRO Transcriptional activator Pur-beta OS=Labeo rohita OX=84645 GN=ROHU_032448 PE=4 SV=1	Labeo rohita
A0A498LGN8	RXN07311.1	Transcriptional activator Pur-alpha-like protein	C	canonical	1	0	355	0	29								A0A498LGN8	756	5				tr|A0A498LGN8|A0A498LGN8_LABRO Transcriptional activator Pur-alpha-like protein OS=Labeo rohita OX=84645 GN=ROHU_012026 PE=4 SV=1	Labeo rohita
A0A498LUM9	RXN11840.1	Purine-rich element-binding gamma	C	canonical	1	0	68	0	8								A0A498LGN8	756	5				tr|A0A498LUM9|A0A498LUM9_LABRO Purine-rich element-binding gamma OS=Labeo rohita OX=84645 GN=ROHU_010446 PE=4 SV=1	Labeo rohita
A0A498N4A0	RXN25356.1	Transcriptional activator Pur-beta	C	canonical	1	0	466	0	26								A0A498LGN8	756	5				tr|A0A498N4A0|A0A498N4A0_LABRO Transcriptional activator Pur-beta OS=Labeo rohita OX=84645 GN=ROHU_036534 PE=4 SV=1	Labeo rohita
A0A498ND90	RXN29176.1	Transcriptional activator Pur-alpha-like protein	C	canonical	1	0	307	0	29								A0A498LGN8	756	5				tr|A0A498ND90|A0A498ND90_LABRO Transcriptional activator Pur-alpha-like protein OS=Labeo rohita OX=84645 GN=ROHU_018905 PE=4 SV=1	Labeo rohita
A0A498LGP1	RXN23290.1	Poly [ADP-ribose] polymerase (PARP) (EC 2.4.2.-)	C	canonical	1	0	547	0	53								A0A498LGP1	757	1				tr|A0A498LGP1|A0A498LGP1_LABRO Poly [ADP-ribose] polymerase OS=Labeo rohita OX=84645 GN=ROHU_035471 PE=4 SV=1	Labeo rohita
A0A498LGP6	RXN31646.1	Nucleolar GTP-binding protein 2	C	canonical	0.998	0	13	0	8								A0A498LGP6	758	1				tr|A0A498LGP6|A0A498LGP6_LABRO Nucleolar GTP-binding protein 2 OS=Labeo rohita OX=84645 GN=ROHU_012863 PE=3 SV=1	Labeo rohita
A0A498LGQ3	RXN06683.1	Alpha-N-acetylgalactosaminide alpha-2,6-sialyltransferase 2	C	indistinguishable representative	0.999	0	31	0	10								A0A498LGQ3	759	2				tr|A0A498LGQ3|A0A498LGQ3_LABRO Alpha-N-acetylgalactosaminide alpha-2,6-sialyltransferase 2 OS=Labeo rohita OX=84645 GN=ROHU_012280 PE=3 SV=1	Labeo rohita
A0A498LGQ8	RXN22392.1	Prostaglandin reductase 2	C	canonical	0.999	0	10	0	4								A0A498LGQ8	760	1				tr|A0A498LGQ8|A0A498LGQ8_LABRO Prostaglandin reductase 2 OS=Labeo rohita OX=84645 GN=ROHU_012046 PE=4 SV=1	Labeo rohita
A0A498LGR4		Pleckstrin domain-containing 1-like protein	C	weak	0.989	0	1	0	1								A0A498LGR4	761	1				tr|A0A498LGR4|A0A498LGR4_LABRO Pleckstrin domain-containing 1-like protein OS=Labeo rohita OX=84645 GN=ROHU_032502 PE=4 SV=1	Labeo rohita
A0A498LGR5		Bifunctional UDP-N-acetylglucosamine transferase and deubiquitinase ALG13 isoform X1	C	indistinguishable representative	0.999	0	10	0	5								A0A498LGR5	762	2				tr|A0A498LGR5|A0A498LGR5_LABRO Bifunctional UDP-N-acetylglucosamine transferase and deubiquitinase ALG13 isoform X1 OS=Labeo rohita OX=84645 GN=ROHU_012555 PE=4 SV=1	Labeo rohita
A0A498LGS8		Protein FAM198B-like	C	weak	0.989	0	1	0	1								A0A498LGS8	763	2				tr|A0A498LGS8|A0A498LGS8_LABRO Protein FAM198B-like OS=Labeo rohita OX=84645 GN=ROHU_032271 PE=4 SV=1	Labeo rohita
A0A498LGS9	RXN18692.1	Leucine-rich repeat-containing 15-like protein	C	weak	0.996	0	1	0	1								A0A498LGS9	764	1				tr|A0A498LGS9|A0A498LGS9_LABRO Leucine-rich repeat-containing 15-like protein OS=Labeo rohita OX=84645 GN=ROHU_007648 PE=4 SV=1	Labeo rohita
A0A498LGT1	RXN19435.1	Tumor protein p63-regulated gene 1 protein	C	canonical	1	0	35	0	12								A0A498LGT1	765	1				tr|A0A498LGT1|A0A498LGT1_LABRO Tumor protein p63-regulated gene 1 protein OS=Labeo rohita OX=84645 GN=ROHU_025748 PE=4 SV=1	Labeo rohita
A0A498LGT2	RXN07380.1	Palmitoyltransferase (EC 2.3.1.225)	C	canonical	0.897	0	2	0	2								A0A498LGT2	766	1				tr|A0A498LGT2|A0A498LGT2_LABRO Palmitoyltransferase OS=Labeo rohita OX=84645 GN=ROHU_010699 PE=3 SV=1	Labeo rohita
A0A498LGT9	RXN06236.1	Costars family ABRACL	C	weak	0.999	0	1	0	1								A0A498LGT9	767	1				tr|A0A498LGT9|A0A498LGT9_LABRO Costars family ABRACL OS=Labeo rohita OX=84645 GN=ROHU_032960 PE=4 SV=1	Labeo rohita
A0A498LGU4		Myosin-IIIb-like isoform X2	C	weak	0.947	0	1	0	1								A0A498LGU4	768	1				tr|A0A498LGU4|A0A498LGU4_LABRO Myosin-IIIb-like isoform X2 OS=Labeo rohita OX=84645 GN=ROHU_033650 PE=3 SV=1	Labeo rohita
A0A498LGV0		Neurofibromin isoform X2	C	indistinguishable representative	0.996	0	4	0	3								A0A498LGV0	769	3				tr|A0A498LGV0|A0A498LGV0_LABRO Neurofibromin isoform X2 OS=Labeo rohita OX=84645 GN=ROHU_032240 PE=4 SV=1	Labeo rohita
A0A498LGX1	RXN04655.1	Vacuolar-sorting SNF8	C	canonical	0.999	0	35	0	5								A0A498LGX1	770	1				tr|A0A498LGX1|A0A498LGX1_LABRO Vacuolar-sorting SNF8 OS=Labeo rohita OX=84645 GN=ROHU_030132 PE=4 SV=1	Labeo rohita
A0A498LGX8	RXN27498.1	Creatine kinase M-type-like protein	C	canonical	1	0	1372	0	21								A0A498LGX8	771	1				tr|A0A498LGX8|A0A498LGX8_LABRO Creatine kinase M-type-like protein OS=Labeo rohita OX=84645 GN=ROHU_011808 PE=3 SV=1	Labeo rohita
A0A498LGY3	RXN16794.1	Enhancer of rudimentary homolog	C	canonical	1	0	127	0	8								A0A498LGY3	772	1				tr|A0A498LGY3|A0A498LGY3_LABRO Enhancer of rudimentary homolog OS=Labeo rohita OX=84645 GN=ROHU_027271 PE=3 SV=1	Labeo rohita
A0A498LGY5	RXN11196.1	X-ray repair cross-complementing 6	C	canonical	1	0	250	0	22								A0A498LGY5	773	1				tr|A0A498LGY5|A0A498LGY5_LABRO X-ray repair cross-complementing 6 OS=Labeo rohita OX=84645 GN=ROHU_030142 PE=4 SV=1	Labeo rohita
A0A498LGZ4	RXN07182.1	Pleckstrin domain-containing 1-like protein	C	weak	0.989	0	2	0	1								A0A498LGZ4	774	1				tr|A0A498LGZ4|A0A498LGZ4_LABRO Pleckstrin domain-containing 1-like protein OS=Labeo rohita OX=84645 GN=ROHU_035484 PE=4 SV=1	Labeo rohita
A0A498LGZ8		Transmembrane protein 199	C	weak	0.889	0	1	0	1								A0A498LGZ8	775	1				tr|A0A498LGZ8|A0A498LGZ8_LABRO Transmembrane protein 199 OS=Labeo rohita OX=84645 GN=ROHU_011828 PE=4 SV=1	Labeo rohita
A0A498LH11	RXN07460.1	Solute carrier family 22 member 2-like protein	C	canonical	0.996	0	7	0	4								A0A498LH11	776	1				tr|A0A498LH11|A0A498LH11_LABRO Solute carrier family 22 member 2-like protein OS=Labeo rohita OX=84645 GN=ROHU_023062 PE=4 SV=1	Labeo rohita
A0A498LH13		Polymerase delta-interacting 2-like isoform X1	C	indistinguishable representative	0.999	0	32	0	10								A0A498LH13	777	2				tr|A0A498LH13|A0A498LH13_LABRO Polymerase delta-interacting 2-like isoform X1 OS=Labeo rohita OX=84645 GN=ROHU_011829 PE=4 SV=1	Labeo rohita
A0A498LH16	RXN07431.1	Histone-like protein	C	indistinguishable representative	1	0	470	0	15								A0A498LH16	778	2				tr|A0A498LH16|A0A498LH16_LABRO Histone-like protein OS=Labeo rohita OX=84645 GN=ROHU_032351 PE=3 SV=1	Labeo rohita
A0A498LH19	RXN07618.1	Pre-rRNA-processing TSR1-like protein	C	canonical	0.999	0	21	0	8								A0A498LH19	779	1				tr|A0A498LH19|A0A498LH19_LABRO Pre-rRNA-processing TSR1-like protein OS=Labeo rohita OX=84645 GN=ROHU_011848 PE=4 SV=1	Labeo rohita
A0A498LH28	RXN07628.1	Coiled-coil domain-containing 9-like protein	C	canonical	0.999	0	97	0	17								A0A498LH28	780	1				tr|A0A498LH28|A0A498LH28_LABRO Coiled-coil domain-containing 9-like protein OS=Labeo rohita OX=84645 GN=ROHU_011858 PE=4 SV=1	Labeo rohita
A0A498LH33	RXN06004.1	RNA-binding Musashi-like protein	C	canonical	0.999	0	21	0	6								A0A498LH33	781	3				tr|A0A498LH33|A0A498LH33_LABRO RNA-binding Musashi-like protein OS=Labeo rohita OX=84645 GN=ROHU_012485 PE=4 SV=1	Labeo rohita
A0A498LSG1	RXN08387.1	RNA-binding Musashi-like protein	C	marginally distinguished	0.999	0	8	0	3								A0A498LH33	781	3				tr|A0A498LSG1|A0A498LSG1_LABRO RNA-binding Musashi-like protein OS=Labeo rohita OX=84645 GN=ROHU_011526 PE=4 SV=1	Labeo rohita
A0A498LH34	RXN07619.1	2-(3-amino-3-carboxypropyl)histidine synthase subunit 1 (EC 2.5.1.108)	C	canonical	0.996	0	3	0	2								A0A498LH34	782	1				tr|A0A498LH34|A0A498LH34_LABRO 2-(3-amino-3-carboxypropyl)histidine synthase subunit 1 OS=Labeo rohita OX=84645 GN=ROHU_011849 PE=3 SV=1	Labeo rohita
A0A498LH37	RXN05007.1	1-acyl-sn-glycerol-3-phosphate acyltransferase delta	C	canonical	0.999	0	13	0	6								A0A498LH37	783	1				tr|A0A498LH37|A0A498LH37_LABRO 1-acyl-sn-glycerol-3-phosphate acyltransferase delta OS=Labeo rohita OX=84645 GN=ROHU_030622 PE=4 SV=1	Labeo rohita
A0A498LH39	RXN06336.1	Kinesin KIF26B	C	weak	0.81	0	1	0	1								A0A498LH39	784	2				tr|A0A498LH39|A0A498LH39_LABRO Kinesin KIF26B OS=Labeo rohita OX=84645 GN=ROHU_032936 PE=3 SV=1	Labeo rohita
A0A498LH41	RXN16951.1	5-AMP-activated kinase subunit gamma-1	C	canonical	1	0	94	0	15								A0A498LH41	785	2				tr|A0A498LH41|A0A498LH41_LABRO 5-AMP-activated kinase subunit gamma-1 OS=Labeo rohita OX=84645 GN=ROHU_027192 PE=4 SV=1	Labeo rohita
A0A498N4J4	RXN27711.1	5-AMP-activated kinase subunit gamma-1-like isoform X1	C	marginally distinguished	0.995	0	23	0	2								A0A498LH41	785	2				tr|A0A498N4J4|A0A498N4J4_LABRO 5-AMP-activated kinase subunit gamma-1-like isoform X1 OS=Labeo rohita OX=84645 GN=ROHU_019720 PE=4 SV=1	Labeo rohita
A0A498LH44	RXN07629.1	Coiled-coil domain-containing 9-like protein	C	canonical	0.999	0	6	0	4								A0A498LH44	786	1				tr|A0A498LH44|A0A498LH44_LABRO Coiled-coil domain-containing 9-like protein OS=Labeo rohita OX=84645 GN=ROHU_011859 PE=4 SV=1	Labeo rohita
A0A498LH48		Metalloendopeptidase (EC 3.4.24.-)	C	weak	0.998	0	4	0	1								A0A498LH48	787	1				tr|A0A498LH48|A0A498LH48_LABRO Metalloendopeptidase OS=Labeo rohita OX=84645 GN=ROHU_027330 PE=4 SV=1	Labeo rohita
A0A498LH50	RXN07648.1	Scavenger receptor class F member 1-like protein	C	canonical	0.993	0	14	0	5								A0A498LH50	788	1				tr|A0A498LH50|A0A498LH50_LABRO Scavenger receptor class F member 1-like protein OS=Labeo rohita OX=84645 GN=ROHU_011878 PE=4 SV=1	Labeo rohita
A0A498LH57	RXN05027.1	Galectin	C	canonical	0.999	0	590	0	12								A0A498LH57	789	1				tr|A0A498LH57|A0A498LH57_LABRO Galectin OS=Labeo rohita OX=84645 GN=ROHU_030603 PE=4 SV=1	Labeo rohita
A0A498LH60	RXN27152.1	T-complex 1 subunit theta isoform X2	C	canonical	1	0	1899	0	60								A0A498LH60	790	1				tr|A0A498LH60|A0A498LH60_LABRO T-complex 1 subunit theta isoform X2 OS=Labeo rohita OX=84645 GN=ROHU_012134 PE=3 SV=1	Labeo rohita
A0A498LH65		ER membrane complex subunit 7	C	indistinguishable representative	0.999	0	33	0	9								A0A498LH65	791	2				tr|A0A498LH65|A0A498LH65_LABRO ER membrane complex subunit 7 OS=Labeo rohita OX=84645 GN=ROHU_012398 PE=4 SV=1	Labeo rohita
A0A498LH66		Zinc-binding A33-like protein	C	weak	0.986	0	1	0	1								A0A498LH66	792	1				tr|A0A498LH66|A0A498LH66_LABRO Zinc-binding A33-like protein OS=Labeo rohita OX=84645 GN=ROHU_012144 PE=4 SV=1	Labeo rohita
A0A498LH73	RXN04765.1	Enteropeptidase	C	indistinguishable representative	0.999	0	7	0	6								A0A498LH73	793	2				tr|A0A498LH73|A0A498LH73_LABRO Enteropeptidase OS=Labeo rohita OX=84645 GN=ROHU_033748 PE=3 SV=1	Labeo rohita
A0A498LH74	RXN22003.1	DENN domain-containing 4B	C	weak	0.989	0	3	0	1								A0A498LH74	794	1				tr|A0A498LH74|A0A498LH74_LABRO DENN domain-containing 4B OS=Labeo rohita OX=84645 GN=ROHU_023887 PE=4 SV=1	Labeo rohita
A0A498LH75	RXN07659.1	Bleomycin hydrolase	C	canonical	0.999	0	216	0	24								A0A498LH75	795	1				tr|A0A498LH75|A0A498LH75_LABRO Bleomycin hydrolase OS=Labeo rohita OX=84645 GN=ROHU_011889 PE=4 SV=1	Labeo rohita
A0A498LH77	RXN07530.1	Tryptophan 2,3-dioxygenase (TDO) (EC 1.13.11.11) (Tryptamin 2,3-dioxygenase) (Tryptophan oxygenase) (TO) (TRPO) (Tryptophan pyrrolase) (Tryptophanase)	C	indistinguishable representative	0.998	0	7	0	5								A0A498LH77	796	2				tr|A0A498LH77|A0A498LH77_LABRO Tryptophan 2,3-dioxygenase OS=Labeo rohita OX=84645 GN=TDO2 PE=3 SV=1	Labeo rohita
A0A498LH80		Transmembrane protein 261	C	canonical	0.98	0	3	0	2								A0A498LH80	797	1				tr|A0A498LH80|A0A498LH80_LABRO Transmembrane protein 261 OS=Labeo rohita OX=84645 GN=ROHU_012164 PE=4 SV=1	Labeo rohita
A0A498LH84	RXN07668.1	A-kinase anchor 12-like protein	C	canonical	1	0	307	0	27								A0A498LH84	798	1				tr|A0A498LH84|A0A498LH84_LABRO A-kinase anchor 12-like protein OS=Labeo rohita OX=84645 GN=ROHU_011898 PE=4 SV=1	Labeo rohita
A0A498LH85	RXN07540.1	Nuclear fragile X mental retardation-interacting 2-like protein	C	canonical	0.996	0	2	0	2								A0A498LH85	799	1				tr|A0A498LH85|A0A498LH85_LABRO Nuclear fragile X mental retardation-interacting 2-like protein OS=Labeo rohita OX=84645 GN=ROHU_032232 PE=4 SV=1	Labeo rohita
A0A498LH90	RXN06893.1	Peptidyl-tRNA hydrolase mitochondrial-like protein	C	canonical	1	0	53	0	7								A0A498LH90	800	1				tr|A0A498LH90|A0A498LH90_LABRO Peptidyl-tRNA hydrolase mitochondrial-like protein OS=Labeo rohita OX=84645 GN=ROHU_012174 PE=4 SV=1	Labeo rohita
A0A498LH94	RXN07689.1	Rap1 GTPase-activating 2-like isoform X5	C	canonical	0.999	0	6	0	4								A0A498LH94	801	1				tr|A0A498LH94|A0A498LH94_LABRO Rap1 GTPase-activating 2-like isoform X5 OS=Labeo rohita OX=84645 GN=ROHU_035459 PE=4 SV=1	Labeo rohita
A0A498LH97	RXN06406.1	Putative RNA-binding 46	C	indistinguishable representative	0.998	0	3	0	3								A0A498LH97	802	2				tr|A0A498LH97|A0A498LH97_LABRO Putative RNA-binding 46 OS=Labeo rohita OX=84645 GN=ROHU_012367 PE=4 SV=1	Labeo rohita
A0A498LH98	RXN04795.1	OX-2 membrane glyco-like protein	C	indistinguishable representative	0.999	0	18	0	6								A0A498LH98	803	2				tr|A0A498LH98|A0A498LH98_LABRO OX-2 membrane glyco-like protein OS=Labeo rohita OX=84645 GN=ROHU_033778 PE=4 SV=1	Labeo rohita
A0A498LH99	RXN07292.1	Sorting nexin-12 isoform X2	C	canonical	1	0	443	0	25								A0A498LH99	804	2				tr|A0A498LH99|A0A498LH99_LABRO Sorting nexin-12 isoform X2 OS=Labeo rohita OX=84645 GN=ROHU_012007 PE=4 SV=1	Labeo rohita
A0A498LKX7	RXN16785.1	Sorting nexin-3	C	canonical	1	0	277	0	20								A0A498LH99	804	2				tr|A0A498LKX7|A0A498LKX7_LABRO Sorting nexin-3 OS=Labeo rohita OX=84645 GN=ROHU_027262 PE=4 SV=1	Labeo rohita
A0A498LHA7	RXN04805.1	Dynein heavy chain axonemal	C	weak	0.886	0	9	0	1								A0A498LHA7	805	2				tr|A0A498LHA7|A0A498LHA7_LABRO Dynein heavy chain axonemal OS=Labeo rohita OX=84645 GN=ROHU_033788 PE=4 SV=1	Labeo rohita
A0A498LHC0	RXN22186.1	Clathrin interactor 1-like protein	C	canonical	1	0	75	0	16								A0A498LHC0	806	1				tr|A0A498LHC0|A0A498LHC0_LABRO Clathrin interactor 1-like protein OS=Labeo rohita OX=84645 GN=ROHU_035464 PE=4 SV=1	Labeo rohita
A0A498LHC5	RXN04825.1	Putative ATP-dependent RNA helicase DDX46	C	indistinguishable representative	0.999	0	44	0	17								A0A498LHC5	807	2				tr|A0A498LHC5|A0A498LHC5_LABRO Putative ATP-dependent RNA helicase DDX46 OS=Labeo rohita OX=84645 GN=ROHU_035670 PE=4 SV=1	Labeo rohita
A0A498LHD2	RXN17592.1	ZP domain-containing protein	C	canonical	0.999	0	31	0	15								A0A498LHD2	808	1				tr|A0A498LHD2|A0A498LHD2_LABRO ZP domain-containing protein OS=Labeo rohita OX=84645 GN=ROHU_035497 PE=4 SV=1	Labeo rohita
A0A498LHD3		Rho-related BTB domain-containing 2 isoform X2	C	weak	0.852	0	1	0	1								A0A498LHD3	809	4				tr|A0A498LHD3|A0A498LHD3_LABRO Rho-related BTB domain-containing 2 isoform X2 OS=Labeo rohita OX=84645 GN=ROHU_012841 PE=4 SV=1	Labeo rohita
A0A498LHE1	RXN04845.1	Stathmin	C	canonical	1	0	113	0	9								A0A498LHE1	810	1				tr|A0A498LHE1|A0A498LHE1_LABRO Stathmin OS=Labeo rohita OX=84645 GN=ROHU_012851 PE=3 SV=1	Labeo rohita
A0A498LHE7	RXN06074.1	Endosialin-like protein	C	weak	0.942	0	4	0	1								A0A498LHE7	811	1				tr|A0A498LHE7|A0A498LHE7_LABRO Endosialin-like protein OS=Labeo rohita OX=84645 GN=ROHU_033043 PE=4 SV=1	Labeo rohita
A0A498LHF1	RXN07610.1	Clustered mitochondria protein homolog	C	canonical	0.999	0	184	0	33								A0A498LHF1	812	3				tr|A0A498LHF1|A0A498LHF1_LABRO Clustered mitochondria protein homolog OS=Labeo rohita OX=84645 GN=ROHU_011840 PE=3 SV=1	Labeo rohita
A0A498LHF3	RXN06084.1	Ankyrin-2 isoform X1	C	canonical	0.998	0	9	0	3								A0A498LHF3	813	1				tr|A0A498LHF3|A0A498LHF3_LABRO Ankyrin-2 isoform X1 OS=Labeo rohita OX=84645 GN=ROHU_016735 PE=4 SV=1	Labeo rohita
A0A498LHF5	RXN06963.1	NADH dehydrogenase (Ubiquinone) complex assembly factor 6 isoform X1	C	canonical	0.999	0	5	0	4								A0A498LHF5	814	1				tr|A0A498LHF5|A0A498LHF5_LABRO NADH dehydrogenase (Ubiquinone) complex assembly factor 6 isoform X1 OS=Labeo rohita OX=84645 GN=ROHU_032579 PE=4 SV=1	Labeo rohita
A0A498L5T1		Syntaxin-binding 3-like isoform X1	C	marginally distinguished	1	0	155	0	21								A0A498LHF7	815	4				tr|A0A498L5T1|A0A498L5T1_LABRO Syntaxin-binding 3-like isoform X1 OS=Labeo rohita OX=84645 GN=ROHU_013636 PE=3 SV=1	Labeo rohita
A0A498LHF7	RXN07748.1	Syntaxin-binding 3-like isoform X1	C	representative	1	0	158	0	27								A0A498LHF7	815	4				tr|A0A498LHF7|A0A498LHF7_LABRO Syntaxin-binding 3-like isoform X1 OS=Labeo rohita OX=84645 GN=ROHU_032182 PE=3 SV=1	Labeo rohita
A0A498LHG8		Stimulated by retinoic acid gene 6-like protein	C	weak	0.995	0	1	0	1								A0A498LHG8	816	2				tr|A0A498LHG8|A0A498LHG8_LABRO Stimulated by retinoic acid gene 6-like protein OS=Labeo rohita OX=84645 GN=ROHU_012881 PE=4 SV=1	Labeo rohita
A0A498LHG9	RXN06476.1	Leucine-rich repeat SHOC-2	C	canonical	0.998	0	18	0	5								A0A498LHG9	817	1				tr|A0A498LHG9|A0A498LHG9_LABRO Leucine-rich repeat SHOC-2 OS=Labeo rohita OX=84645 GN=ROHU_035522 PE=4 SV=1	Labeo rohita
A0A498LHH1	RXN06104.1	SH3 and multiple ankyrin repeat domains 3-like isoform X3	C	weak	0.989	0	2	0	1								A0A498LHH1	818	1				tr|A0A498LHH1|A0A498LHH1_LABRO SH3 and multiple ankyrin repeat domains 3-like isoform X3 OS=Labeo rohita OX=84645 GN=ROHU_033073 PE=4 SV=1	Labeo rohita
A0A498LHH2		Breast carcinoma-amplified sequence 3	C	weak	0.953	0	1	0	1								A0A498LHH2	819	1				tr|A0A498LHH2|A0A498LHH2_LABRO Breast carcinoma-amplified sequence 3 OS=Labeo rohita OX=84645 GN=ROHU_011860 PE=4 SV=1	Labeo rohita
A0A498LHI8	RXN06496.1	Aspartate aminotransferase (EC 2.6.1.1)	C	canonical	1	0	3311	0	80								A0A498LHI8	820	1				tr|A0A498LHI8|A0A498LHI8_LABRO Aspartate aminotransferase OS=Labeo rohita OX=84645 GN=ROHU_030563 PE=4 SV=1	Labeo rohita
A0A498LHJ8	RXN06506.1	Blood vessel epicardial substance isoform X1	C	canonical	1	0	35	0	9								A0A498LHJ8	821	1				tr|A0A498LHJ8|A0A498LHJ8_LABRO Blood vessel epicardial substance isoform X1 OS=Labeo rohita OX=84645 GN=ROHU_032801 PE=4 SV=1	Labeo rohita
A0A498LHL4	RXN07670.1	Synaptosomal-associated protein	C	canonical	1	0	1259	0	36								A0A498LHL4	822	2				tr|A0A498LHL4|A0A498LHL4_LABRO Synaptosomal-associated protein OS=Labeo rohita OX=84645 GN=ROHU_011900 PE=3 SV=1	Labeo rohita
A0A498N3H6	RXN28728.1	Calpain small subunit 1-like protein	C	canonical	1	0	875	0	31								A0A498LHL4	822	2				tr|A0A498N3H6|A0A498N3H6_LABRO Calpain small subunit 1-like protein OS=Labeo rohita OX=84645 GN=ROHU_005303 PE=4 SV=1	Labeo rohita
A0A498LHM3		BCL2 adenovirus E1B 19 kDa-interacting 3	C	weak	0.989	0	4	0	1								A0A498LHM3	823	1				tr|A0A498LHM3|A0A498LHM3_LABRO BCL2 adenovirus E1B 19 kDa-interacting 3 OS=Labeo rohita OX=84645 GN=ROHU_012061 PE=4 SV=1	Labeo rohita
A0A498LHN6	RXN06174.1	Trans-2-enoyl-mitochondrial-like protein	C	weak	0.986	0	3	0	1								A0A498LHN6	824	1				tr|A0A498LHN6|A0A498LHN6_LABRO Trans-2-enoyl-mitochondrial-like protein OS=Labeo rohita OX=84645 GN=ROHU_012452 PE=4 SV=1	Labeo rohita
A0A498LHP4		Metal transporter CNNM4-like protein	C	indistinguishable representative	0.998	0	4	0	3								A0A498LHP4	825	2				tr|A0A498LHP4|A0A498LHP4_LABRO Metal transporter CNNM4-like protein OS=Labeo rohita OX=84645 GN=ROHU_032453 PE=4 SV=1	Labeo rohita
A0A498LHP5	RXN06184.1	Mitogen-activated kinase kinase kinase 5	C	canonical	0.994	0	4	0	4								A0A498LHP5	826	1				tr|A0A498LHP5|A0A498LHP5_LABRO Mitogen-activated kinase kinase kinase 5 OS=Labeo rohita OX=84645 GN=ROHU_012462 PE=4 SV=1	Labeo rohita
A0A498LHP6	RXN07848.1	Lactosylceramide alpha-2,3-sialyltransferase-like isoform X1	C	weak	0.999	0	1	0	1								A0A498LHP6	827	1				tr|A0A498LHP6|A0A498LHP6_LABRO Lactosylceramide alpha-2,3-sialyltransferase-like isoform X1 OS=Labeo rohita OX=84645 GN=ROHU_011785 PE=3 SV=1	Labeo rohita
A0A498LHP9		Putative inactive glycosyltransferase 25 family member 3	C	weak	0.908	0	1	0	1								A0A498LHP9	828	2				tr|A0A498LHP9|A0A498LHP9_LABRO Putative inactive glycosyltransferase 25 family member 3 OS=Labeo rohita OX=84645 GN=ROHU_032219 PE=4 SV=1	Labeo rohita
A0A498LHR2	RXN05257.1	Transgelin	C	canonical	1	0	2429	0	69								A0A498LHR2	829	6				tr|A0A498LHR2|A0A498LHR2_LABRO Transgelin OS=Labeo rohita OX=84645 GN=ROHU_005320 PE=3 SV=1	Labeo rohita
A0A498LYG1		Transgelin	C	indistinguishable representative	1	0	13753	0	200								A0A498LHR2	829	6				tr|A0A498LYG1|A0A498LYG1_LABRO Transgelin OS=Labeo rohita OX=84645 GN=ROHU_029030 PE=3 SV=1	Labeo rohita
A0A498M4W7	RXN15918.1	Transgelin	C	canonical	1	0	217	0	27								A0A498LHR2	829	6				tr|A0A498M4W7|A0A498M4W7_LABRO Transgelin OS=Labeo rohita OX=84645 GN=ROHU_008576 PE=3 SV=1	Labeo rohita
A0A498NRS5	RXN34655.1	Transgelin	C	canonical	1	0	198	0	24								A0A498LHR2	829	6				tr|A0A498NRS5|A0A498NRS5_LABRO Transgelin OS=Labeo rohita OX=84645 GN=ROHU_014740 PE=3 SV=1	Labeo rohita
A0A498LHR7	RXN07621.1	Replication protein A subunit	C	canonical	1	0	466	0	57								A0A498LHR7	830	1				tr|A0A498LHR7|A0A498LHR7_LABRO Replication protein A subunit OS=Labeo rohita OX=84645 GN=ROHU_011851 PE=3 SV=1	Labeo rohita
A0A498LHR9	RXN04995.1	SET domain-containing 9 isoform X1	C	canonical	0.999	0	7	0	5								A0A498LHR9	831	1				tr|A0A498LHR9|A0A498LHR9_LABRO SET domain-containing 9 isoform X1 OS=Labeo rohita OX=84645 GN=ROHU_012837 PE=4 SV=1	Labeo rohita
A0A498LHS2	RXN07402.1	PDZ domain-containing 11 isoform X1	C	canonical	0.994	0	3	0	2								A0A498LHS2	832	1				tr|A0A498LHS2|A0A498LHS2_LABRO PDZ domain-containing 11 isoform X1 OS=Labeo rohita OX=84645 GN=ROHU_032322 PE=4 SV=1	Labeo rohita
A0A498LHT3	RXN05277.1	DCC-interacting 13-beta-like protein	C	canonical	1	0	181	0	33								A0A498LHT3	833	2				tr|A0A498LHT3|A0A498LHT3_LABRO DCC-interacting 13-beta-like protein OS=Labeo rohita OX=84645 GN=ROHU_033507 PE=4 SV=1	Labeo rohita
A0A498LQ34	RXN10201.1	DCC-interacting 13-alpha isoform X2	C	canonical	0.999	0	194	0	18								A0A498LHT3	833	2				tr|A0A498LQ34|A0A498LQ34_LABRO DCC-interacting 13-alpha isoform X2 OS=Labeo rohita OX=84645 GN=ROHU_010918 PE=4 SV=1	Labeo rohita
A0A498LHU4	RXN06234.1	Peptidyl-tRNA hydrolase PTRHD1	C	canonical	0.999	0	25	0	3								A0A498LHU4	834	1				tr|A0A498LHU4|A0A498LHU4_LABRO Peptidyl-tRNA hydrolase PTRHD1 OS=Labeo rohita OX=84645 GN=ROHU_032958 PE=4 SV=1	Labeo rohita
A0A498LHV0	RXN07909.1	Spectrin beta chain, non-erythrocytic 1-like	C	canonical	1	0	415	0	10								A0A498LHV0	835	1				tr|A0A498LHV0|A0A498LHV0_LABRO Spectrin beta chain, non-erythrocytic 1-like OS=Labeo rohita OX=84645 GN=ROHU_035131 PE=4 SV=1	Labeo rohita
A0A498LHV4	RXN07908.1	Macrophage mannose receptor 1-like protein	C	indistinguishable representative	0.999	0	17	0	7								A0A498LHV4	836	2				tr|A0A498LHV4|A0A498LHV4_LABRO Macrophage mannose receptor 1-like protein OS=Labeo rohita OX=84645 GN=ROHU_032108 PE=4 SV=1	Labeo rohita
A0A498LHV8	RXN07432.1	NLRC3-like isoform X1	C	indistinguishable representative	0.999	0	59	0	9								A0A498LHV8	837	2				tr|A0A498LHV8|A0A498LHV8_LABRO NLRC3-like isoform X1 OS=Labeo rohita OX=84645 GN=ROHU_032352 PE=4 SV=1	Labeo rohita
A0A498LHW1	RXN05045.1	Pecanex 1 isoform X3	C	canonical	0.998	0	53	0	6								A0A498LHW1	838	1				tr|A0A498LHW1|A0A498LHW1_LABRO Pecanex 1 isoform X3 OS=Labeo rohita OX=84645 GN=ROHU_035655 PE=4 SV=1	Labeo rohita
A0A498LHW2	RXN07133.1	N-chimaerin	C	canonical	0.999	0	14	0	6								A0A498LHW2	839	1				tr|A0A498LHW2|A0A498LHW2_LABRO N-chimaerin OS=Labeo rohita OX=84645 GN=ROHU_032523 PE=4 SV=1	Labeo rohita
A0A498LHW4	RXN07918.1	Betaine--homocysteine S-methyltransferase 1	C	indistinguishable representative	1	0	3362	0	124								A0A498LHW4	840	2				tr|A0A498LHW4|A0A498LHW4_LABRO Betaine--homocysteine S-methyltransferase 1 OS=Labeo rohita OX=84645 GN=ROHU_035422 PE=4 SV=1	Labeo rohita
A0A498LHW5	RXN05307.1	Calpain-10	C	indistinguishable representative	0.99	0	10	0	3								A0A498LHW5	841	2				tr|A0A498LHW5|A0A498LHW5_LABRO Calpain-10 OS=Labeo rohita OX=84645 GN=ROHU_012716 PE=3 SV=1	Labeo rohita
A0A498LHW8	RXN07661.1	Echinoderm microtubule-associated-like 2 isoform X1	C	canonical	1	0	1043	0	51								A0A498LHW8	842	2				tr|A0A498LHW8|A0A498LHW8_LABRO Echinoderm microtubule-associated-like 2 isoform X1 OS=Labeo rohita OX=84645 GN=ROHU_011891 PE=4 SV=1	Labeo rohita
A0A498MKI8	RXN17155.1	Echinoderm microtubule-associated-like 1 isoform X2	C	canonical	0.999	0	51	0	17								A0A498LHW8	842	2				tr|A0A498MKI8|A0A498MKI8_LABRO Echinoderm microtubule-associated-like 1 isoform X2 OS=Labeo rohita OX=84645 GN=ROHU_024802 PE=4 SV=1	Labeo rohita
A0A498LHY4	RXN07153.1	DDB1-and CUL4-associated factor 17	C	canonical	0.995	0	16	0	2								A0A498LHY4	843	1				tr|A0A498LHY4|A0A498LHY4_LABRO DDB1-and CUL4-associated factor 17 OS=Labeo rohita OX=84645 GN=ROHU_032543 PE=4 SV=1	Labeo rohita
A0A498LHZ4	RXN07949.1	Delta-like protein	C	canonical	0.999	0	93	0	14								A0A498LHZ4	844	1				tr|A0A498LHZ4|A0A498LHZ4_LABRO Delta-like protein OS=Labeo rohita OX=84645 GN=ROHU_005182 PE=4 SV=1	Labeo rohita
A0A498LHZ8	RXN07691.1	Exonuclease mut-7-like protein	C	indistinguishable representative	0.999	0	14	0	9								A0A498LHZ8	845	2				tr|A0A498LHZ8|A0A498LHZ8_LABRO Exonuclease mut-7-like protein OS=Labeo rohita OX=84645 GN=ROHU_035445 PE=4 SV=1	Labeo rohita
A0A498LI06	RXN07959.1	Tumor necrosis factor alpha-induced 2-like protein	C	representative	0.996	0	4	0	3								A0A498LI06	846	3				tr|A0A498LI06|A0A498LI06_LABRO Tumor necrosis factor alpha-induced 2-like protein OS=Labeo rohita OX=84645 GN=ROHU_032047 PE=4 SV=1	Labeo rohita
A0A498LI09	RXN04270.1	ATP synthase subunit gamma	C	canonical	1	0	1722	0	56								A0A498LI09	847	1				tr|A0A498LI09|A0A498LI09_LABRO ATP synthase subunit gamma OS=Labeo rohita OX=84645 GN=ROHU_013043 PE=3 SV=1	Labeo rohita
A0A498LI20	RXN05115.1	Activating signal cointegrator 1 complex subunit 3	C	weak	0.886	0	1	0	1								A0A498LI20	848	1				tr|A0A498LI20|A0A498LI20_LABRO Activating signal cointegrator 1 complex subunit 3 OS=Labeo rohita OX=84645 GN=ROHU_033604 PE=4 SV=1	Labeo rohita
A0A498LI31	RXN05367.1	Alpha-globin transcription factor CP2	C	canonical	0.999	0	25	0	9								A0A498LI31	849	1				tr|A0A498LI31|A0A498LI31_LABRO Alpha-globin transcription factor CP2 OS=Labeo rohita OX=84645 GN=ROHU_033383 PE=4 SV=1	Labeo rohita
A0A498LI33	RXN06676.1	Rho GDP-dissociation inhibitor 1	C	canonical	1	0	1308	0	51								A0A498LI33	850	2				tr|A0A498LI33|A0A498LI33_LABRO Rho GDP-dissociation inhibitor 1 OS=Labeo rohita OX=84645 GN=ROHU_012273 PE=4 SV=1	Labeo rohita
A0A498N0Q6	RXN26640.1	Rho GDP-dissociation inhibitor 2-like isoform X2	C	canonical	1	0	903	0	44								A0A498LI33	850	2				tr|A0A498N0Q6|A0A498N0Q6_LABRO Rho GDP-dissociation inhibitor 2-like isoform X2 OS=Labeo rohita OX=84645 GN=ROHU_005694 PE=4 SV=1	Labeo rohita
A0A498LI34	RXN07860.1	Calnexin-like protein	C	canonical	1	0	22	0	9								A0A498LI34	851	1				tr|A0A498LI34|A0A498LI34_LABRO Calnexin-like protein OS=Labeo rohita OX=84645 GN=ROHU_008505 PE=3 SV=1	Labeo rohita
A0A498LI37	RXN05135.1	Proton myo-inositol cotransporter-like protein	C	canonical	0.999	0	15	0	4								A0A498LI37	852	1				tr|A0A498LI37|A0A498LI37_LABRO Proton myo-inositol cotransporter-like protein OS=Labeo rohita OX=84645 GN=ROHU_012778 PE=3 SV=1	Labeo rohita
A0A498LI49	RXN16851.1	Tudor domain-containing 6-like isoform X1	C	canonical	1	0	674	0	120								A0A498LI49	853	1				tr|A0A498LI49|A0A498LI49_LABRO Tudor domain-containing 6-like isoform X1 OS=Labeo rohita OX=84645 GN=ROHU_027328 PE=4 SV=1	Labeo rohita
A0A498LI50	RXN06696.1	Cytoplasmic phosphatidylinositol transfer 1-like protein	C	indistinguishable representative	0.999	0	11	0	3								A0A498LI50	854	2				tr|A0A498LI50|A0A498LI50_LABRO Cytoplasmic phosphatidylinositol transfer 1-like protein OS=Labeo rohita OX=84645 GN=ROHU_012293 PE=4 SV=1	Labeo rohita
A0A498LI52	RXN23242.1	Golgi-associated PDZ and coiled-coil motif-containing-like isoform X1	C	canonical	0.999	0	20	0	7								A0A498LI52	855	1				tr|A0A498LI52|A0A498LI52_LABRO Golgi-associated PDZ and coiled-coil motif-containing-like isoform X1 OS=Labeo rohita OX=84645 GN=ROHU_011928 PE=4 SV=1	Labeo rohita
A0A498LI68	RXN07798.1	Transmembrane protease serine 9-like protein	C	canonical	0.988	0	2	0	2								A0A498LI68	856	1				tr|A0A498LI68|A0A498LI68_LABRO Transmembrane protease serine 9-like protein OS=Labeo rohita OX=84645 GN=ROHU_011705 PE=3 SV=1	Labeo rohita
A0A498LI76	RXN07253.1	Amyloid beta A4-binding family B member 3-like isoform X2	C	weak	0.98	0	4	0	1								A0A498LI76	857	1				tr|A0A498LI76|A0A498LI76_LABRO Amyloid beta A4-binding family B member 3-like isoform X2 OS=Labeo rohita OX=84645 GN=ROHU_011968 PE=4 SV=1	Labeo rohita
A0A498LI79		Putative helicase with zinc finger domain	C	weak	0.977	0	1	0	1								A0A498LI79	858	2				tr|A0A498LI79|A0A498LI79_LABRO Putative helicase with zinc finger domain OS=Labeo rohita OX=84645 GN=ROHU_035512 PE=4 SV=1	Labeo rohita
A0A498LI92	RXN07920.1	TBC1 domain family member 13	C	indistinguishable representative	0.997	0	3	0	2								A0A498LI92	859	2				tr|A0A498LI92|A0A498LI92_LABRO TBC1 domain family member 13 OS=Labeo rohita OX=84645 GN=ROHU_035424 PE=4 SV=1	Labeo rohita
A0A498L9J9	RXN04902.1	Long-chain-fatty-acid--ligase 1-like protein	C	marginally distinguished	0.999	0	131	0	37								A0A498LI98	860	40				tr|A0A498L9J9|A0A498L9J9_LABRO Long-chain-fatty-acid--ligase 1-like protein OS=Labeo rohita OX=84645 GN=ROHU_035665 PE=4 SV=1	Labeo rohita
A0A498LDW3	RXN25503.1	Long-chain-fatty-acid--ligase 1 isoform X1	C	canonical	0.999	0	180	0	24								A0A498LI98	860	40				tr|A0A498LDW3|A0A498LDW3_LABRO Long-chain-fatty-acid--ligase 1 isoform X1 OS=Labeo rohita OX=84645 GN=ROHU_021418 PE=4 SV=1	Labeo rohita
A0A498LG79	RXN07328.1	Complement factor B-like protein	C	canonical	1	0	213	0	27								A0A498LI98	860	40				tr|A0A498LG79|A0A498LG79_LABRO Complement factor B-like protein OS=Labeo rohita OX=84645 GN=ROHU_012043 PE=3 SV=1	Labeo rohita
A0A498LI98	RXN23460.1	Spectrin beta chain	C	canonical	1	0	4155	0	196								A0A498LI98	860	40				tr|A0A498LI98|A0A498LI98_LABRO Spectrin beta chain OS=Labeo rohita OX=84645 GN=ROHU_022866 PE=3 SV=1	Labeo rohita
A0A498LMB7	RXN08982.1	Alpha-actinin-2 isoform X2	C	canonical	1	0	2589	0	84								A0A498LI98	860	40				tr|A0A498LMB7|A0A498LMB7_LABRO Alpha-actinin-2 isoform X2 OS=Labeo rohita OX=84645 GN=ROHU_035315 PE=4 SV=1	Labeo rohita
A0A498LNP9	RXN09780.1	Long-chain-fatty-acid--ligase 1-like protein	C	canonical	0.999	0	181	0	43								A0A498LI98	860	40				tr|A0A498LNP9|A0A498LNP9_LABRO Long-chain-fatty-acid--ligase 1-like protein OS=Labeo rohita OX=84645 GN=ROHU_031242 PE=4 SV=1	Labeo rohita
A0A498LP64	RXN07327.1	Complement factor B-like protein	C	canonical	1	0	234	0	29								A0A498LI98	860	40				tr|A0A498LP64|A0A498LP64_LABRO Complement factor B-like protein OS=Labeo rohita OX=84645 GN=ROHU_012042 PE=3 SV=1	Labeo rohita
A0A498LQB7	RXN32975.1	Alpha-actinin-1 isoform X5	C	canonical	1	0	4862	0	127								A0A498LI98	860	40				tr|A0A498LQB7|A0A498LQB7_LABRO Alpha-actinin-1 isoform X5 OS=Labeo rohita OX=84645 GN=ROHU_011433 PE=4 SV=1	Labeo rohita
A0A498LQH8	RXN08964.1	Alpha-actinin-2 isoform X2	C	canonical	1	0	318	0	10								A0A498LI98	860	40				tr|A0A498LQH8|A0A498LQH8_LABRO Alpha-actinin-2 isoform X2 OS=Labeo rohita OX=84645 GN=ROHU_011503 PE=4 SV=1	Labeo rohita
A0A498LQS7	RXN10451.1	Spectrin beta erythrocytic-like protein	C	canonical	1	0	761	0	21								A0A498LI98	860	40				tr|A0A498LQS7|A0A498LQS7_LABRO Spectrin beta erythrocytic-like protein OS=Labeo rohita OX=84645 GN=ROHU_010895 PE=4 SV=1	Labeo rohita
A0A498LRL0	RXN09726.1	Long-chain-fatty-acid--ligase 5	C	canonical	1	0	168	0	25								A0A498LI98	860	40				tr|A0A498LRL0|A0A498LRL0_LABRO Long-chain-fatty-acid--ligase 5 OS=Labeo rohita OX=84645 GN=ROHU_031393 PE=4 SV=1	Labeo rohita
A0A498LRW8	RXN10452.1	Spectrin beta erythrocytic-like protein	C	canonical	1	0	1554	0	140								A0A498LI98	860	40				tr|A0A498LRW8|A0A498LRW8_LABRO Spectrin beta erythrocytic-like protein OS=Labeo rohita OX=84645 GN=ROHU_010896 PE=4 SV=1	Labeo rohita
A0A498M3N6		Methionine sulfoxide oxidase mical3b-like protein	C	marginally distinguished	0.998	0	4	0	4								A0A498LI98	860	40				tr|A0A498M3N6|A0A498M3N6_LABRO Methionine sulfoxide oxidase mical3b-like protein OS=Labeo rohita OX=84645 GN=ROHU_008761 PE=4 SV=1	Labeo rohita
A0A498M5K9	RXN34192.1	Guanine nucleotide-binding subunit beta-2-like 1	C	canonical	1	0	2427	0	59								A0A498LI98	860	40				tr|A0A498M5K9|A0A498M5K9_LABRO Guanine nucleotide-binding subunit beta-2-like 1 OS=Labeo rohita OX=84645 GN=ROHU_015110 PE=4 SV=1	Labeo rohita
A0A498ME15	RXN19429.1	Complement factor B-like protein	C	canonical	1	0	226	0	33								A0A498LI98	860	40				tr|A0A498ME15|A0A498ME15_LABRO Complement factor B-like protein OS=Labeo rohita OX=84645 GN=ROHU_007296 PE=3 SV=1	Labeo rohita
A0A498MEQ1	RXN04740.1	Long-chain-fatty-acid--ligase 6-like isoform X2	C	canonical	0.999	0	138	0	19								A0A498LI98	860	40				tr|A0A498MEQ1|A0A498MEQ1_LABRO Long-chain-fatty-acid--ligase 6-like isoform X2 OS=Labeo rohita OX=84645 GN=ROHU_008526 PE=4 SV=1	Labeo rohita
A0A498MH19	RXN19430.1	Complement factor B-like protein	C	canonical	1	0	1190	0	67								A0A498LI98	860	40				tr|A0A498MH19|A0A498MH19_LABRO Complement factor B-like protein OS=Labeo rohita OX=84645 GN=ROHU_007297 PE=3 SV=1	Labeo rohita
A0A498MHZ7	RXN19032.1	Alpha-actinin-3	C	canonical	1	0	9034	0	185								A0A498LI98	860	40				tr|A0A498MHZ7|A0A498MHZ7_LABRO Alpha-actinin-3 OS=Labeo rohita OX=84645 GN=ROHU_006952 PE=4 SV=1	Labeo rohita
A0A498MJ06	RXN19432.1	Complement factor B-like protein	C	canonical	1	0	309	0	34								A0A498LI98	860	40				tr|A0A498MJ06|A0A498MJ06_LABRO Complement factor B-like protein OS=Labeo rohita OX=84645 GN=ROHU_007299 PE=3 SV=1	Labeo rohita
A0A498MM55	RXN20893.1	Spectrin beta non-erythrocytic 4 isoform X1	C	marginally distinguished	1	0	663	0	20								A0A498LI98	860	40				tr|A0A498MM55|A0A498MM55_LABRO Spectrin beta non-erythrocytic 4 isoform X1 OS=Labeo rohita OX=84645 GN=ROHU_024615 PE=4 SV=1	Labeo rohita
A0A498MXB9	RXN24242.1	Alpha-actinin-4 isoform X2	C	canonical	1	0	11098	0	193								A0A498LI98	860	40				tr|A0A498MXB9|A0A498MXB9_LABRO Alpha-actinin-4 isoform X2 OS=Labeo rohita OX=84645 GN=ROHU_006210 PE=3 SV=1	Labeo rohita
A0A498MY34	RXN24753.1	Methionine sulfoxide oxidase mical3a isoform X2	C	canonical	0.998	0	9	0	6								A0A498LI98	860	40				tr|A0A498MY34|A0A498MY34_LABRO Methionine sulfoxide oxidase mical3a isoform X2 OS=Labeo rohita OX=84645 GN=ROHU_036588 PE=4 SV=1	Labeo rohita
A0A498N230	RXN28379.1	Long-chain-fatty-acid--ligase 1-like protein	C	canonical	1	0	620	0	47								A0A498LI98	860	40				tr|A0A498N230|A0A498N230_LABRO Long-chain-fatty-acid--ligase 1-like protein OS=Labeo rohita OX=84645 GN=ROHU_019322 PE=4 SV=1	Labeo rohita
A0A498N8A7	RXN32175.1	Eukaryotic translation initiation factor 5B	C	canonical	1	0	202	0	46								A0A498LI98	860	40				tr|A0A498N8A7|A0A498N8A7_LABRO Eukaryotic translation initiation factor 5B OS=Labeo rohita OX=84645 GN=ROHU_036135 PE=4 SV=1	Labeo rohita
A0A498N915	RXN27116.1	Alpha-actinin-3-like isoform X1	C	canonical	1	0	7566	0	181								A0A498LI98	860	40				tr|A0A498N915|A0A498N915_LABRO Alpha-actinin-3-like isoform X1 OS=Labeo rohita OX=84645 GN=ROHU_020569 PE=3 SV=1	Labeo rohita
A0A498NB81	RXN29152.1	Guanine nucleotide-binding subunit beta-2-like 1	C	marginally distinguished	1	0	2520	0	60								A0A498LI98	860	40				tr|A0A498NB81|A0A498NB81_LABRO Guanine nucleotide-binding subunit beta-2-like 1 OS=Labeo rohita OX=84645 GN=ROHU_018881 PE=4 SV=1	Labeo rohita
A0A498NHS6	RXN31396.1	Putative tRNA N6-adenosine mitochondrial	C	canonical	0.999	0	8	0	5								A0A498LI98	860	40				tr|A0A498NHS6|A0A498NHS6_LABRO Putative tRNA N6-adenosine mitochondrial OS=Labeo rohita OX=84645 GN=ROHU_017060 PE=4 SV=1	Labeo rohita
A0A498NLE1		Alpha-actinin-3-like isoform X2	C	representative	1	0	2205	0	65								A0A498LI98	860	40				tr|A0A498NLE1|A0A498NLE1_LABRO Alpha-actinin-3-like isoform X2 OS=Labeo rohita OX=84645 GN=ROHU_004546 PE=4 SV=1	Labeo rohita
A0A498NMU8	RXN33245.1	Spectrin beta non-erythrocytic 4 isoform X1	C	marginally distinguished	1	0	677	0	29								A0A498LI98	860	40				tr|A0A498NMU8|A0A498NMU8_LABRO Spectrin beta non-erythrocytic 4 isoform X1 OS=Labeo rohita OX=84645 GN=ROHU_004361 PE=4 SV=1	Labeo rohita
A0A498P418	RXN39410.1	Complement factor B-like protein	C	canonical	1	0	35	0	7								A0A498LI98	860	40				tr|A0A498P418|A0A498P418_LABRO Complement factor B-like protein OS=Labeo rohita OX=84645 GN=ROHU_000209 PE=4 SV=1	Labeo rohita
A0A498LIA0	RXN07283.1	Ribonucleoside-diphosphate reductase (EC 1.17.4.1)	C	canonical	1	0	214	0	40								A0A498LIA0	861	1				tr|A0A498LIA0|A0A498LIA0_LABRO Ribonucleoside-diphosphate reductase OS=Labeo rohita OX=84645 GN=ROHU_011998 PE=3 SV=1	Labeo rohita
A0A498LIB2		E3 ubiquitin-ligase HERC2 isoform X1	C	weak	0.943	0	41	0	1								A0A498LIB2	862	1				tr|A0A498LIB2|A0A498LIB2_LABRO E3 ubiquitin-ligase HERC2 isoform X1 OS=Labeo rohita OX=84645 GN=ROHU_035398 PE=4 SV=1	Labeo rohita
A0A498LIC0	RXN27493.1	Complement C1q tumor necrosis factor-related 5	C	canonical	1	0	37	0	10								A0A498LIC0	863	1				tr|A0A498LIC0|A0A498LIC0_LABRO Complement C1q tumor necrosis factor-related 5 OS=Labeo rohita OX=84645 GN=ROHU_011802 PE=4 SV=1	Labeo rohita
A0A498LIC3		Retrovirus-related Pol polyprotein from transposon 412	C	weak	0.86	0	1	0	1								A0A498LIC3	864	3				tr|A0A498LIC3|A0A498LIC3_LABRO Retrovirus-related Pol polyprotein from transposon 412 OS=Labeo rohita OX=84645 GN=ROHU_035407 PE=4 SV=1	Labeo rohita
A0A498LID7	RXN28547.1	Extracellular matrix 1-like protein	C	canonical	1	0	15	0	5								A0A498LID7	865	1				tr|A0A498LID7|A0A498LID7_LABRO Extracellular matrix 1-like protein OS=Labeo rohita OX=84645 GN=ROHU_019148 PE=4 SV=1	Labeo rohita
A0A498LID8	RXN07592.1	Unconventional myosin-XVIIIa-like protein	C	canonical	0.999	0	29	0	10								A0A498LID8	866	2				tr|A0A498LID8|A0A498LID8_LABRO Unconventional myosin-XVIIIa-like protein OS=Labeo rohita OX=84645 GN=ROHU_011822 PE=4 SV=1	Labeo rohita
A0A498LY50	RXN13170.1	Unconventional myosin-XVIIIa-like protein	C	canonical	0.999	0	40	0	10								A0A498LID8	866	2				tr|A0A498LY50|A0A498LY50_LABRO Unconventional myosin-XVIIIa-like protein OS=Labeo rohita OX=84645 GN=ROHU_029157 PE=4 SV=1	Labeo rohita
A0A498LIE2	RXN28743.1	Tubulin polymerization-promoting family member 3-like protein	C	canonical	1	0	204	0	24								A0A498LIE2	867	2				tr|A0A498LIE2|A0A498LIE2_LABRO Tubulin polymerization-promoting family member 3-like protein OS=Labeo rohita OX=84645 GN=ROHU_005318 PE=4 SV=1	Labeo rohita
A0A498MN92	RXN21082.1	Dipeptidase (EC 3.4.13.19)	C	canonical	1	0	57	0	12								A0A498LIE2	867	2				tr|A0A498MN92|A0A498MN92_LABRO Dipeptidase OS=Labeo rohita OX=84645 GN=ROHU_024468 PE=3 SV=1	Labeo rohita
A0A498LIF0		Golgi SNAP receptor complex member 1 isoform X2	C	indistinguishable representative	0.999	0	5	0	3								A0A498LIF0	868	2				tr|A0A498LIF0|A0A498LIF0_LABRO Golgi SNAP receptor complex member 1 isoform X2 OS=Labeo rohita OX=84645 GN=ROHU_011832 PE=4 SV=1	Labeo rohita
A0A498LIF1	RXN06464.1	Programmed cell death 4	C	indistinguishable representative	0.999	0	7	0	4								A0A498LIF1	869	2				tr|A0A498LIF1|A0A498LIF1_LABRO Programmed cell death 4 OS=Labeo rohita OX=84645 GN=ROHU_012351 PE=4 SV=1	Labeo rohita
A0A498LIF2	RXN07333.1	Trifunctional enzyme subunit mitochondrial-like protein	C	canonical	1	0	3755	0	99								A0A498LIF2	870	5				tr|A0A498LIF2|A0A498LIF2_LABRO Trifunctional enzyme subunit mitochondrial-like protein OS=Labeo rohita OX=84645 GN=ROHU_012048 PE=3 SV=1	Labeo rohita
A0A498N3J5	RXN26743.1	Zinc transporter 1-like isoform X1	C	canonical	1	0	5	0	3								A0A498LIF2	870	5				tr|A0A498N3J5|A0A498N3J5_LABRO Zinc transporter 1-like isoform X1 OS=Labeo rohita OX=84645 GN=ROHU_005611 PE=4 SV=1	Labeo rohita
A0A498NKM0	RXN32254.1	Trifunctional enzyme subunit mitochondrial-like protein	C	canonical	1	0	3584	0	98								A0A498LIF2	870	5				tr|A0A498NKM0|A0A498NKM0_LABRO Trifunctional enzyme subunit mitochondrial-like protein OS=Labeo rohita OX=84645 GN=ROHU_016345 PE=4 SV=1	Labeo rohita
A0A498LIF8	RXN07612.1	Apoptosis-inducing factor 3-like protein	C	canonical	0.999	0	10	0	4								A0A498LIF8	871	1				tr|A0A498LIF8|A0A498LIF8_LABRO Apoptosis-inducing factor 3-like protein OS=Labeo rohita OX=84645 GN=ROHU_011842 PE=4 SV=1	Labeo rohita
A0A498LIG2	RXN27226.1	Poly [ADP-ribose] polymerase 12-like protein	C	canonical	0.987	0	2	0	2								A0A498LIG2	872	1				tr|A0A498LIG2|A0A498LIG2_LABRO Poly [ADP-ribose] polymerase 12-like protein OS=Labeo rohita OX=84645 GN=ROHU_020217 PE=4 SV=1	Labeo rohita
A0A498LIG4	RXN27225.1	Poly [ADP-ribose] polymerase (PARP) (EC 2.4.2.-)	C	canonical	0.999	0	23	0	10								A0A498LIG4	873	1				tr|A0A498LIG4|A0A498LIG4_LABRO Poly [ADP-ribose] polymerase OS=Labeo rohita OX=84645 GN=ROHU_020216 PE=4 SV=1	Labeo rohita
A0A498LIG6	RXN05275.1	Plexin-B2-like protein	C	canonical	1	0	306	0	59								A0A498LIG6	874	16				tr|A0A498LIG6|A0A498LIG6_LABRO Plexin-B2-like protein OS=Labeo rohita OX=84645 GN=ROHU_033505 PE=4 SV=1	Labeo rohita
A0A498LNU8	RXN10069.1	Plexin-A1-like isoform X1	C	canonical	0.999	0	154	0	24								A0A498LIG6	874	16				tr|A0A498LNU8|A0A498LNU8_LABRO Plexin-A1-like isoform X1 OS=Labeo rohita OX=84645 GN=ROHU_031162 PE=4 SV=1	Labeo rohita
A0A498LQE4	RXN10311.1	Plexin-B1	C	canonical	0.999	0	14	0	6								A0A498LIG6	874	16				tr|A0A498LQE4|A0A498LQE4_LABRO Plexin-B1 OS=Labeo rohita OX=84645 GN=ROHU_037373 PE=4 SV=1	Labeo rohita
A0A498LT48	RXN08627.1	Plexin A3	C	canonical	0.999	0	108	0	13								A0A498LIG6	874	16				tr|A0A498LT48|A0A498LT48_LABRO Plexin A3 OS=Labeo rohita OX=84645 GN=ROHU_019201 PE=4 SV=1	Labeo rohita
A0A498LWN6	RXN12600.1	Plexin-D1	C	representative	0.999	0	20	0	9								A0A498LIG6	874	16				tr|A0A498LWN6|A0A498LWN6_LABRO Plexin-D1 OS=Labeo rohita OX=84645 GN=ROHU_029401 PE=4 SV=1	Labeo rohita
A0A498M9K4	RXN17719.1	Plexin-A4 isoform X1	C	canonical	0.999	0	150	0	22								A0A498LIG6	874	16				tr|A0A498M9K4|A0A498M9K4_LABRO Plexin-A4 isoform X1 OS=Labeo rohita OX=84645 GN=ROHU_026566 PE=4 SV=1	Labeo rohita
A0A498MEX1	RXN19759.1	Plexin-B2-like protein	C	canonical	1	0	288	0	54								A0A498LIG6	874	16				tr|A0A498MEX1|A0A498MEX1_LABRO Plexin-B2-like protein OS=Labeo rohita OX=84645 GN=ROHU_025632 PE=4 SV=1	Labeo rohita
A0A498MFM2		Plexin-C1-like isoform X1	C	marginally distinguished	0.999	0	19	0	2								A0A498LIG6	874	16				tr|A0A498MFM2|A0A498MFM2_LABRO Plexin-C1-like isoform X1 OS=Labeo rohita OX=84645 GN=ROHU_024345 PE=4 SV=1	Labeo rohita
A0A498ML38	RXN22098.1	Plexin-A2-like protein	C	canonical	0.999	0	113	0	19								A0A498LIG6	874	16				tr|A0A498ML38|A0A498ML38_LABRO Plexin-A2-like protein OS=Labeo rohita OX=84645 GN=ROHU_023605 PE=4 SV=1	Labeo rohita
A0A498MZI6	RXN24922.1	Plexin-B1-like isoform X1	C	canonical	0.999	0	26	0	13								A0A498LIG6	874	16				tr|A0A498MZI6|A0A498MZI6_LABRO Plexin-B1-like isoform X1 OS=Labeo rohita OX=84645 GN=ROHU_021875 PE=4 SV=1	Labeo rohita
A0A498NKS1	RXN32550.1	Plexin-A1 isoform X2	C	canonical	0.999	0	75	0	11								A0A498LIG6	874	16				tr|A0A498NKS1|A0A498NKS1_LABRO Plexin-A1 isoform X2 OS=Labeo rohita OX=84645 GN=ROHU_036101 PE=4 SV=1	Labeo rohita
A0A498LIG7		Jade-3	C	weak	0.974	0	1	0	1								A0A498LIG7	875	1				tr|A0A498LIG7|A0A498LIG7_LABRO Jade-3 OS=Labeo rohita OX=84645 GN=ROHU_011686 PE=4 SV=1	Labeo rohita
A0A498LIH1	RXN07353.1	Platelet-derived growth factor C	C	indistinguishable representative	0.999	0	35	0	6								A0A498LIH1	876	2				tr|A0A498LIH1|A0A498LIH1_LABRO Platelet-derived growth factor C OS=Labeo rohita OX=84645 GN=ROHU_032273 PE=4 SV=1	Labeo rohita
A0A498LIH2	RXN08129.1	60S ribosomal protein L18a	C	canonical	1	0	629	0	23								A0A498LIH2	877	1				tr|A0A498LIH2|A0A498LIH2_LABRO 60S ribosomal protein L18a OS=Labeo rohita OX=84645 GN=ROHU_020228 PE=3 SV=1	Labeo rohita
A0A498LIH8		Gamma-aminobutyric acid receptor subunit alpha-5	C	weak	0.987	0	1	0	1								A0A498LIH8	878	2				tr|A0A498LIH8|A0A498LIH8_LABRO Gamma-aminobutyric acid receptor subunit alpha-5 OS=Labeo rohita OX=84645 GN=ROHU_011696 PE=3 SV=1	Labeo rohita
A0A498LIJ6	RXN22943.1	5'-nucleotidase (EC 3.1.3.5)	C	canonical	0.999	0	4	0	2								A0A498LIJ6	879	1				tr|A0A498LIJ6|A0A498LIJ6_LABRO 5'-nucleotidase OS=Labeo rohita OX=84645 GN=ROHU_006534 PE=3 SV=1	Labeo rohita
A0A498LIK7	RXN07393.1	C1GALT1-specific chaperone 1-like protein	C	canonical	0.999	0	18	0	5								A0A498LIK7	880	1				tr|A0A498LIK7|A0A498LIK7_LABRO C1GALT1-specific chaperone 1-like protein OS=Labeo rohita OX=84645 GN=ROHU_032313 PE=4 SV=1	Labeo rohita
A0A498LIK9	RXN27288.1	Monocarboxylate transporter 2-like protein	C	canonical	0.999	0	13	0	5								A0A498LIK9	881	1				tr|A0A498LIK9|A0A498LIK9_LABRO Monocarboxylate transporter 2-like protein OS=Labeo rohita OX=84645 GN=ROHU_035391 PE=4 SV=1	Labeo rohita
A0A498LIL3	RXN08168.1	Ras-related and estrogen-regulated growth inhibitor	C	indistinguishable representative	0.999	0	7	0	4								A0A498LIL3	882	2				tr|A0A498LIL3|A0A498LIL3_LABRO Ras-related and estrogen-regulated growth inhibitor OS=Labeo rohita OX=84645 GN=ROHU_035129 PE=4 SV=1	Labeo rohita
A0A498LIL7	RXN08179.1	Alpha-galactosidase (EC 3.2.1.-)	C	indistinguishable representative	1	0	209	0	15								A0A498LIL7	883	2				tr|A0A498LIL7|A0A498LIL7_LABRO Alpha-galactosidase OS=Labeo rohita OX=84645 GN=ROHU_031938 PE=3 SV=1	Labeo rohita
A0A498LIM1	RXN06866.1	Arfaptin-2-like isoform X4	C	canonical	1	0	14	0	7								A0A498LIM1	884	3				tr|A0A498LIM1|A0A498LIM1_LABRO Arfaptin-2-like isoform X4 OS=Labeo rohita OX=84645 GN=ROHU_012147 PE=4 SV=1	Labeo rohita
A0A498MIP8	RXN18766.1	Protocadherin-16-like protein	C	marginally distinguished	0.999	0	10	0	3								A0A498LIM1	884	3				tr|A0A498MIP8|A0A498MIP8_LABRO Protocadherin-16-like protein OS=Labeo rohita OX=84645 GN=ROHU_026059 PE=4 SV=1	Labeo rohita
A0A498LIM4	RXN07672.1	XIAP-associated factor 1-like protein	C	canonical	0.999	0	12	0	2								A0A498LIM4	885	1				tr|A0A498LIM4|A0A498LIM4_LABRO XIAP-associated factor 1-like protein OS=Labeo rohita OX=84645 GN=ROHU_011902 PE=4 SV=1	Labeo rohita
A0A498LIN1		Solute carrier family 35 member F4-like protein	C	weak	0.991	0	1	0	1								A0A498LIN1	886	1				tr|A0A498LIN1|A0A498LIN1_LABRO Solute carrier family 35 member F4-like protein OS=Labeo rohita OX=84645 GN=ROHU_012157 PE=4 SV=1	Labeo rohita
A0A498LIP3	RXN06886.1	EH domain-containing 1-like protein	C	canonical	1	0	1324	0	52								A0A498LIP3	887	11				tr|A0A498LIP3|A0A498LIP3_LABRO EH domain-containing 1-like protein OS=Labeo rohita OX=84645 GN=ROHU_012167 PE=3 SV=1	Labeo rohita
A0A498LKP9	RXN06197.1	EH domain-containing 3	C	canonical	1	0	690	0	49								A0A498LIP3	887	11				tr|A0A498LKP9|A0A498LKP9_LABRO EH domain-containing 3 OS=Labeo rohita OX=84645 GN=ROHU_032977 PE=3 SV=1	Labeo rohita
A0A498MHF3	RXN20729.1	EH domain-containing 4-like protein	C	representative	1	0	494	0	34								A0A498LIP3	887	11				tr|A0A498MHF3|A0A498MHF3_LABRO EH domain-containing 4-like protein OS=Labeo rohita OX=84645 GN=ROHU_024821 PE=3 SV=1	Labeo rohita
A0A498MS40	RXN22683.1	A-kinase anchor mitochondrial-like protein	C	canonical	0.999	0	126	0	6								A0A498LIP3	887	11				tr|A0A498MS40|A0A498MS40_LABRO A-kinase anchor mitochondrial-like protein OS=Labeo rohita OX=84645 GN=ROHU_036730 PE=3 SV=1	Labeo rohita
A0A498N4U7	RXN26832.1	EH domain-containing 1-like protein	C	canonical	1	0	676	0	45								A0A498LIP3	887	11				tr|A0A498N4U7|A0A498N4U7_LABRO EH domain-containing 1-like protein OS=Labeo rohita OX=84645 GN=ROHU_005564 PE=3 SV=1	Labeo rohita
A0A498NAN4	RXN29483.1	Coiled-coil and C2 domain-containing 1A	C	canonical	0.999	0	52	0	16								A0A498LIP3	887	11				tr|A0A498NAN4|A0A498NAN4_LABRO Coiled-coil and C2 domain-containing 1A OS=Labeo rohita OX=84645 GN=ROHU_036279 PE=4 SV=1	Labeo rohita
A0A498LIP9	RXN07951.1	Calcineurin B-like protein	C	weak	0.987	0	1	0	1								A0A498LIP9	888	1				tr|A0A498LIP9|A0A498LIP9_LABRO Calcineurin B-like protein OS=Labeo rohita OX=84645 GN=ROHU_005181 PE=4 SV=1	Labeo rohita
A0A498LIQ6	RXN05365.1	Integrin alpha-5-like protein	C	canonical	0.999	0	123	0	19								A0A498LIQ6	889	1				tr|A0A498LIQ6|A0A498LIQ6_LABRO Integrin alpha-5-like protein OS=Labeo rohita OX=84645 GN=ROHU_033381 PE=3 SV=1	Labeo rohita
A0A498LIR1	RXN21366.1	Dopamine beta-hydroxylase	C	weak	0.987	0	4	0	1								A0A498LIR1	890	1				tr|A0A498LIR1|A0A498LIR1_LABRO Dopamine beta-hydroxylase OS=Labeo rohita OX=84645 GN=ROHU_024287 PE=4 SV=1	Labeo rohita
A0A498LIR4		Reverse transcriptase domain-containing protein	C	weak	0.969	0	1	0	1								A0A498LIR4	891	2				tr|A0A498LIR4|A0A498LIR4_LABRO Reverse transcriptase domain-containing protein OS=Labeo rohita OX=84645 GN=ROHU_035383 PE=4 SV=1	Labeo rohita
A0A498LIS4	RXN06916.1	Signal peptidase complex subunit 1	C	canonical	1	0	98	0	5								A0A498LIS4	892	1				tr|A0A498LIS4|A0A498LIS4_LABRO Signal peptidase complex subunit 1 OS=Labeo rohita OX=84645 GN=ROHU_012197 PE=4 SV=1	Labeo rohita
A0A498LIT3	RXN08249.1	Podocan-like isoform X1	C	canonical	0.999	0	111	0	21								A0A498LIT3	893	1				tr|A0A498LIT3|A0A498LIT3_LABRO Podocan-like isoform X1 OS=Labeo rohita OX=84645 GN=ROHU_035381 PE=4 SV=1	Labeo rohita
A0A498LIT5	RXN03388.1	Neuronal growth regulator 1-like isoform X2	C	canonical	1	0	182	0	17								A0A498LIT5	894	1				tr|A0A498LIT5|A0A498LIT5_LABRO Neuronal growth regulator 1-like isoform X2 OS=Labeo rohita OX=84645 GN=ROHU_011677 PE=4 SV=1	Labeo rohita
A0A498LIT6	RXN26081.1	Adenylate kinase 2, mitochondrial (AK 2) (EC 2.7.4.3) (ATP-AMP transphosphorylase 2) (ATP:AMP phosphotransferase) (Adenylate monophosphate kinase)	C	canonical	1	0	779	0	28								A0A498LIT6	895	2				tr|A0A498LIT6|A0A498LIT6_LABRO Adenylate kinase 2, mitochondrial OS=Labeo rohita OX=84645 GN=AK2 PE=3 SV=1	Labeo rohita
A0A498N071	RXN27689.1	UMP-CMP kinase (EC 2.7.4.14) (Deoxycytidylate kinase) (CK) (dCMP kinase) (Nucleoside-diphosphate kinase) (EC 2.7.4.6) (Uridine monophosphate/cytidine monophosphate kinase) (UMP/CMP kinase) (UMP/CMPK)	C	canonical	1	0	677	0	26								A0A498LIT6	895	2				tr|A0A498N071|A0A498N071_LABRO UMP-CMP kinase OS=Labeo rohita OX=84645 GN=CMPK1 PE=3 SV=1	Labeo rohita
A0A498LIU3	RXN08001.1	Protein XRP2	C	canonical	0.999	0	54	0	10								A0A498LIU3	896	1				tr|A0A498LIU3|A0A498LIU3_LABRO Protein XRP2 OS=Labeo rohita OX=84645 GN=ROHU_011687 PE=3 SV=1	Labeo rohita
A0A498LIU8	RXN05587.1	Nuclear export mediator factor NEMF	C	canonical	1	0	47	0	11								A0A498LIU8	897	1				tr|A0A498LIU8|A0A498LIU8_LABRO Nuclear export mediator factor NEMF OS=Labeo rohita OX=84645 GN=ROHU_033330 PE=4 SV=1	Labeo rohita
A0A498LIV9	RXN27259.1	FGFR1 oncogene partner 2	C	weak	0.984	0	1	0	1								A0A498LIV9	898	1				tr|A0A498LIV9|A0A498LIV9_LABRO FGFR1 oncogene partner 2 OS=Labeo rohita OX=84645 GN=ROHU_020250 PE=4 SV=1	Labeo rohita
A0A498LIX0	RXN08278.1	von Willebrand factor A domain-containing 1-like protein	C	canonical	1	0	311	0	17								A0A498LIX0	899	1				tr|A0A498LIX0|A0A498LIX0_LABRO von Willebrand factor A domain-containing 1-like protein OS=Labeo rohita OX=84645 GN=ROHU_011611 PE=4 SV=1	Labeo rohita
A0A498LIX9	RXN05445.1	Pre-B-cell leukemia transcription factor-interacting 1-like isoform X1	C	canonical	0.999	0	169	0	16								A0A498LIX9	900	1				tr|A0A498LIX9|A0A498LIX9_LABRO Pre-B-cell leukemia transcription factor-interacting 1-like isoform X1 OS=Labeo rohita OX=84645 GN=ROHU_030854 PE=4 SV=1	Labeo rohita
A0A498LIZ3	RXN07473.1	Poly [ADP-ribose] polymerase 1	C	representative	1	0	151	0	11								A0A498LIZ3	901	2				tr|A0A498LIZ3|A0A498LIZ3_LABRO Poly [ADP-ribose] polymerase 1 OS=Labeo rohita OX=84645 GN=ROHU_032393 PE=4 SV=1	Labeo rohita
A0A498MS25	RXN23260.1	Poly [ADP-ribose] polymerase 1	C	marginally distinguished	1	0	142	0	10								A0A498LIZ3	901	2				tr|A0A498MS25|A0A498MS25_LABRO Poly [ADP-ribose] polymerase 1 OS=Labeo rohita OX=84645 GN=ROHU_023075 PE=4 SV=1	Labeo rohita
A0A498LIZ4	RXN05637.1	Choline ethanolaminephosphotransferase 1 isoform X1	C	weak	0.727	0	3	0	1								A0A498LIZ4	902	1				tr|A0A498LIZ4|A0A498LIZ4_LABRO Choline ethanolaminephosphotransferase 1 isoform X1 OS=Labeo rohita OX=84645 GN=ROHU_012634 PE=3 SV=1	Labeo rohita
A0A498LIZ6	RXN08329.1	TSSC1	C	representative	0.999	0	35	0	11								A0A498LIZ6	903	2				tr|A0A498LIZ6|A0A498LIZ6_LABRO TSSC1 OS=Labeo rohita OX=84645 GN=ROHU_011571 PE=4 SV=1	Labeo rohita
A0A498LJ11	RXN12316.1	Guanylate cyclase soluble subunit beta-1	C	canonical	1	0	539	0	47								A0A498LJ11	904	2				tr|A0A498LJ11|A0A498LJ11_LABRO Guanylate cyclase soluble subunit beta-1 OS=Labeo rohita OX=84645 GN=ROHU_029662 PE=3 SV=1	Labeo rohita
A0A498MRL9	RXN24258.1	Guanylate cyclase soluble subunit alpha-2	C	canonical	0.999	0	10	0	6								A0A498LJ11	904	2				tr|A0A498MRL9|A0A498MRL9_LABRO Guanylate cyclase soluble subunit alpha-2 OS=Labeo rohita OX=84645 GN=ROHU_006226 PE=3 SV=1	Labeo rohita
A0A498LJ20	RXN05485.1	Ladinin-1 isoform X1	C	canonical	0.999	0	142	0	11								A0A498LJ20	905	2				tr|A0A498LJ20|A0A498LJ20_LABRO Ladinin-1 isoform X1 OS=Labeo rohita OX=84645 GN=ROHU_033344 PE=4 SV=1	Labeo rohita
A0A498LJ32	RXN33773.1	Double-strand break repair MRE11A	C	canonical	0.995	0	4	0	2								A0A498LJ32	906	1				tr|A0A498LJ32|A0A498LJ32_LABRO Double-strand break repair MRE11A OS=Labeo rohita OX=84645 GN=ROHU_015376 PE=4 SV=1	Labeo rohita
A0A498LJ34	RXN07852.1	SH3 domain-binding glutamic acid-rich-like protein	C	canonical	1	0	832	0	36								A0A498LJ34	907	1				tr|A0A498LJ34|A0A498LJ34_LABRO SH3 domain-binding glutamic acid-rich-like protein OS=Labeo rohita OX=84645 GN=ROHU_011789 PE=3 SV=1	Labeo rohita
A0A498LJ37	RXN08348.1	Uncharacterized protein	C	canonical	0.999	0	11	0	4								A0A498LJ37	908	2				tr|A0A498LJ37|A0A498LJ37_LABRO Uncharacterized protein OS=Labeo rohita OX=84645 GN=ROHU_031911 PE=4 SV=1	Labeo rohita
A0A498ML61	RXN17995.1	Trafficking particle complex subunit 6B	C	canonical	0.999	0	10	0	3								A0A498LJ37	908	2				tr|A0A498ML61|A0A498ML61_LABRO Trafficking particle complex subunit 6B OS=Labeo rohita OX=84645 GN=ROHU_007916 PE=4 SV=1	Labeo rohita
A0A498LJ47		Heat shock 30-like protein	C	weak	0.812	0	1	0	1								A0A498LJ47	909	1				tr|A0A498LJ47|A0A498LJ47_LABRO Heat shock 30-like protein OS=Labeo rohita OX=84645 GN=ROHU_012673 PE=3 SV=1	Labeo rohita
A0A498LJ54	RXN07533.1	ATP-binding cassette sub-family A member 3	C	canonical	0.998	0	32	0	10								A0A498LJ54	910	2				tr|A0A498LJ54|A0A498LJ54_LABRO ATP-binding cassette sub-family A member 3 OS=Labeo rohita OX=84645 GN=ROHU_035461 PE=4 SV=1	Labeo rohita
A0A498LJ56		Apoptosis-inducing factor 3-like protein	C	weak	0.989	0	1	0	1								A0A498LJ56	911	2				tr|A0A498LJ56|A0A498LJ56_LABRO Apoptosis-inducing factor 3-like protein OS=Labeo rohita OX=84645 GN=ROHU_032466 PE=4 SV=1	Labeo rohita
A0A498LJ59	RXN07872.1	Tudor domain-containing 3-like protein	C	canonical	0.999	0	49	0	24								A0A498LJ59	912	1				tr|A0A498LJ59|A0A498LJ59_LABRO Tudor domain-containing 3-like protein OS=Labeo rohita OX=84645 GN=ROHU_032072 PE=4 SV=1	Labeo rohita
A0A498LJ63		Exportin-T (Exportin(tRNA)) (tRNA exportin)	C	representative	0.999	0	57	0	22								A0A498LJ63	913	2				tr|A0A498LJ63|A0A498LJ63_LABRO Exportin-T OS=Labeo rohita OX=84645 GN=ROHU_031954 PE=3 SV=1	Labeo rohita
A0A498LJ72	RXN07096.1	NADH dehydrogenase [ubiquinone] 1 beta subcomplex subunit 3-like protein	C	canonical	1	0	91	0	6								A0A498LJ72	914	1				tr|A0A498LJ72|A0A498LJ72_LABRO NADH dehydrogenase [ubiquinone] 1 beta subcomplex subunit 3-like protein OS=Labeo rohita OX=84645 GN=ROHU_032486 PE=4 SV=1	Labeo rohita
A0A498LJ76	RXN05545.1	N-acylneuraminate cytidylyltransferase-like protein	C	weak	0.994	0	1	0	1								A0A498LJ76	915	2				tr|A0A498LJ76|A0A498LJ76_LABRO N-acylneuraminate cytidylyltransferase-like protein OS=Labeo rohita OX=84645 GN=ROHU_035601 PE=4 SV=1	Labeo rohita
A0A498LJ79		Bifunctional arginine demethylase and lysyl-hydroxylase JMJD6	C	weak	0.84	0	2	0	1								A0A498LJ79	916	1				tr|A0A498LJ79|A0A498LJ79_LABRO Bifunctional arginine demethylase and lysyl-hydroxylase JMJD6 OS=Labeo rohita OX=84645 GN=ROHU_012281 PE=4 SV=1	Labeo rohita
A0A498LJ89		Decapping and exoribonuclease	C	weak	0.989	0	1	0	1								A0A498LJ89	917	1				tr|A0A498LJ89|A0A498LJ89_LABRO Decapping and exoribonuclease OS=Labeo rohita OX=84645 GN=ROHU_012291 PE=4 SV=1	Labeo rohita
A0A498LJA9		Apolipo L4-like protein	C	canonical	0.998	0	2	0	2								A0A498LJA9	918	1				tr|A0A498LJA9|A0A498LJA9_LABRO Apolipo L4-like protein OS=Labeo rohita OX=84645 GN=ROHU_031860 PE=4 SV=1	Labeo rohita
A0A498LJB0	RXN07146.1	Histone acetyltransferase type B catalytic subunit	C	canonical	1	0	15	0	8								A0A498LJB0	919	1				tr|A0A498LJB0|A0A498LJB0_LABRO Histone acetyltransferase type B catalytic subunit OS=Labeo rohita OX=84645 GN=ROHU_032536 PE=4 SV=1	Labeo rohita
A0A498LA61	RXN34610.1	Gamma-enolase	C	canonical	1	0	1966	0	79								A0A498LJB6	920	7				tr|A0A498LA61|A0A498LA61_LABRO Gamma-enolase OS=Labeo rohita OX=84645 GN=ROHU_014940 PE=3 SV=1	Labeo rohita
A0A498LBG8	RXN03844.1	Arginine-glutamic acid dipeptide repeats-like isoform X1	C	canonical	1	0	6774	0	149								A0A498LJB6	920	7				tr|A0A498LBG8|A0A498LBG8_LABRO Arginine-glutamic acid dipeptide repeats-like isoform X1 OS=Labeo rohita OX=84645 GN=ROHU_035760 PE=3 SV=1	Labeo rohita
A0A498LJB6	RXN08459.1	Beta-enolase	C	canonical	1	0	16675	0	213								A0A498LJB6	920	7				tr|A0A498LJB6|A0A498LJB6_LABRO Beta-enolase OS=Labeo rohita OX=84645 GN=ROHU_031881 PE=3 SV=1	Labeo rohita
A0A498LMQ3	RXN09331.1	Enolase isoform X1	C	canonical	1	0	10313	0	198								A0A498LJB6	920	7				tr|A0A498LMQ3|A0A498LMQ3_LABRO Enolase isoform X1 OS=Labeo rohita OX=84645 GN=ROHU_011152 PE=3 SV=1	Labeo rohita
A0A498MCU4	RXN14897.1	Regulator of microtubule dynamics 1	C	canonical	1	0	317	0	19								A0A498LJB6	920	7				tr|A0A498MCU4|A0A498MCU4_LABRO Regulator of microtubule dynamics 1 OS=Labeo rohita OX=84645 GN=ROHU_028522 PE=4 SV=1	Labeo rohita
A0A498NLG6	RXN32554.1	Voltage-dependent calcium channel gamma-2 subunit	C	canonical	0.999	0	6	0	3								A0A498LJB6	920	7				tr|A0A498NLG6|A0A498NLG6_LABRO Voltage-dependent calcium channel gamma-2 subunit OS=Labeo rohita OX=84645 GN=ROHU_036105 PE=3 SV=1	Labeo rohita
A0A498LJC4	RXN05727.1	Uroporphyrinogen decarboxylase (EC 4.1.1.37)	C	canonical	1	0	400	0	24								A0A498LJC4	921	1				tr|A0A498LJC4|A0A498LJC4_LABRO Uroporphyrinogen decarboxylase OS=Labeo rohita OX=84645 GN=ROHU_033222 PE=3 SV=1	Labeo rohita
A0A498LJC9	RXN07613.1	Non-specific serine/threonine protein kinase (EC 2.7.11.1)	C	weak	0.989	0	1	0	1								A0A498LJC9	922	1				tr|A0A498LJC9|A0A498LJC9_LABRO Non-specific serine/threonine protein kinase OS=Labeo rohita OX=84645 GN=ROHU_011843 PE=4 SV=1	Labeo rohita
A0A498LJD4	RXN08469.1	Uncharacterized protein	C	canonical	1	0	1380	0	102								A0A498LJD4	923	10				tr|A0A498LJD4|A0A498LJD4_LABRO Uncharacterized protein OS=Labeo rohita OX=84645 GN=ROHU_031891 PE=4 SV=1	Labeo rohita
A0A498LJD5	RXN08468.1	Diffuse panbronchiolitis critical region 1	C	canonical	0.999	0	105	0	8								A0A498LJD4	923	10				tr|A0A498LJD5|A0A498LJD5_LABRO Diffuse panbronchiolitis critical region 1 OS=Labeo rohita OX=84645 GN=ROHU_031890 PE=4 SV=1	Labeo rohita
A0A498LN29	RXN08466.1	Zonadhesin-like isoform X1	C	canonical	1	0	1268	0	74								A0A498LJD4	923	10				tr|A0A498LN29|A0A498LN29_LABRO Zonadhesin-like isoform X1 OS=Labeo rohita OX=84645 GN=ROHU_031888 PE=4 SV=1	Labeo rohita
A0A498MAQ2	RXN18168.1	Semaphorin-4B-like protein	C	indistinguishable representative	1	0	26	0	2								A0A498LJD4	923	10				tr|A0A498MAQ2|A0A498MAQ2_LABRO Semaphorin-4B-like protein OS=Labeo rohita OX=84645 GN=ROHU_026312 PE=3 SV=1	Labeo rohita
A0A498MNL8	RXN23058.1	Nidogen-1-like protein	C	canonical	0.997	0	14	0	5								A0A498LJD4	923	10				tr|A0A498MNL8|A0A498MNL8_LABRO Nidogen-1-like protein OS=Labeo rohita OX=84645 GN=ROHU_036702 PE=4 SV=1	Labeo rohita
A0A498N2S9	RXN23057.1	Nidogen-1-like protein	C	canonical	1	0	73	0	15								A0A498LJD4	923	10				tr|A0A498N2S9|A0A498N2S9_LABRO Nidogen-1-like protein OS=Labeo rohita OX=84645 GN=ROHU_036701 PE=4 SV=1	Labeo rohita
A0A498LJD8	RXN05595.1	Cytoplasmic dynein 1 heavy chain 1	C	canonical	1	0	3474	0	226								A0A498LJD8	924	2				tr|A0A498LJD8|A0A498LJD8_LABRO Cytoplasmic dynein 1 heavy chain 1 OS=Labeo rohita OX=84645 GN=ROHU_035598 PE=4 SV=1	Labeo rohita
A0A498MTQ5	RXN25078.1	Lysoplasmalogenase TMEM86A	C	representative	0.999	0	4	0	2								A0A498LJD8	924	2				tr|A0A498MTQ5|A0A498MTQ5_LABRO Lysoplasmalogenase TMEM86A OS=Labeo rohita OX=84645 GN=ROHU_021767 PE=4 SV=1	Labeo rohita
A0A498LJE3	RXN08478.1	NF-X1-type zinc finger NFXL1	C	canonical	0.999	0	11	0	8								A0A498LJE3	925	1				tr|A0A498LJE3|A0A498LJE3_LABRO NF-X1-type zinc finger NFXL1 OS=Labeo rohita OX=84645 GN=ROHU_031900 PE=4 SV=1	Labeo rohita
A0A498LJF1	RXN05757.1	Ubiquitin-conjugating enzyme E2 W	C	representative	1	0	145	0	10								A0A498LJF1	926	2				tr|A0A498LJF1|A0A498LJF1_LABRO Ubiquitin-conjugating enzyme E2 W OS=Labeo rohita OX=84645 GN=ROHU_033252 PE=3 SV=1	Labeo rohita
A0A498LJG1	RXN08498.1	NF-X1-type zinc finger NFXL1	C	canonical	0.999	0	8	0	3								A0A498LJG1	927	1				tr|A0A498LJG1|A0A498LJG1_LABRO NF-X1-type zinc finger NFXL1 OS=Labeo rohita OX=84645 GN=ROHU_035359 PE=4 SV=1	Labeo rohita
A0A498L685		Rab-like protein 6 isoform X8	C	indistinguishable representative	0.999	0	8	0	3								A0A498LJG8	928	3				tr|A0A498L685|A0A498L685_LABRO Rab-like protein 6 isoform X8 OS=Labeo rohita OX=84645 GN=ROHU_035215 PE=4 SV=1	Labeo rohita
A0A498LJG8	RXN08380.1	Rab 6	C	canonical	0.999	0	14	0	5								A0A498LJG8	928	3				tr|A0A498LJG8|A0A498LJG8_LABRO Rab 6 OS=Labeo rohita OX=84645 GN=ROHU_035364 PE=4 SV=1	Labeo rohita
A0A498LJH1	RXN08508.1	Seleno M-like protein	C	canonical	0.999	0	10	0	5								A0A498LJH1	929	1				tr|A0A498LJH1|A0A498LJH1_LABRO Seleno M-like protein OS=Labeo rohita OX=84645 GN=ROHU_019176 PE=4 SV=1	Labeo rohita
A0A498LJH2	RXN08499.1	Cyclic nucleotide-gated channel rod photoreceptor subunit alpha-like protein	C	canonical	0.999	0	6	0	2								A0A498LJH2	930	1				tr|A0A498LJH2|A0A498LJH2_LABRO Cyclic nucleotide-gated channel rod photoreceptor subunit alpha-like protein OS=Labeo rohita OX=84645 GN=ROHU_035360 PE=4 SV=1	Labeo rohita
A0A498LJH7	RXN07206.1	Protein transport protein sec16	C	weak	0.984	0	1	0	1								A0A498LJH7	931	2				tr|A0A498LJH7|A0A498LJH7_LABRO Protein transport protein sec16 OS=Labeo rohita OX=84645 GN=ROHU_032416 PE=3 SV=1	Labeo rohita
A0A498LJH9	RXN17501.1	Claudin-15-like isoform X2	C	canonical	0.999	0	64	0	7								A0A498LJH9	932	1				tr|A0A498LJH9|A0A498LJH9_LABRO Claudin-15-like isoform X2 OS=Labeo rohita OX=84645 GN=ROHU_012095 PE=3 SV=1	Labeo rohita
A0A498LJK8		Mitochondrial import inner membrane translocase subunit Tim10 B-like protein	C	indistinguishable representative	0.995	0	6	0	3								A0A498LJK8	933	2				tr|A0A498LJK8|A0A498LJK8_LABRO Mitochondrial import inner membrane translocase subunit Tim10 B-like protein OS=Labeo rohita OX=84645 GN=ROHU_012125 PE=4 SV=1	Labeo rohita
A0A498LJK9	RXN08271.1	FYVE and coiled-coil domain-containing 1-like protein	C	weak	0.971	0	1	0	1								A0A498LJK9	934	1				tr|A0A498LJK9|A0A498LJK9_LABRO FYVE and coiled-coil domain-containing 1-like protein OS=Labeo rohita OX=84645 GN=ROHU_011604 PE=4 SV=1	Labeo rohita
A0A498LJL9	RXN07256.1	Pre-mRNA-splicing factor RBM22	C	canonical	0.999	0	16	0	5								A0A498LJL9	935	2				tr|A0A498LJL9|A0A498LJL9_LABRO Pre-mRNA-splicing factor RBM22 OS=Labeo rohita OX=84645 GN=ROHU_011971 PE=4 SV=1	Labeo rohita
A0A498LJM8	RXN07713.1	Long-chain fatty acid transport 4	C	indistinguishable representative	0.999	0	79	0	14								A0A498LJM8	936	2				tr|A0A498LJM8|A0A498LJM8_LABRO Long-chain fatty acid transport 4 OS=Labeo rohita OX=84645 GN=ROHU_032222 PE=4 SV=1	Labeo rohita
A0A498LJN3	RXN08450.1	Ceramide-1-phosphate transfer-like protein	C	representative	0.999	0	6	0	3								A0A498LJN3	937	2				tr|A0A498LJN3|A0A498LJN3_LABRO Ceramide-1-phosphate transfer-like protein OS=Labeo rohita OX=84645 GN=ROHU_031872 PE=4 SV=1	Labeo rohita
A0A498LJN6	RXN07276.1	Tyrosine sulfotransferase 1-like protein	C	canonical	0.999	0	10	0	6								A0A498LJN6	938	1				tr|A0A498LJN6|A0A498LJN6_LABRO Tyrosine sulfotransferase 1-like protein OS=Labeo rohita OX=84645 GN=ROHU_011991 PE=4 SV=1	Labeo rohita
A0A498LJN8		Proto-oncogene DBL-like isoform X2	C	weak	0.928	0	1	0	1								A0A498LJN8	939	3				tr|A0A498LJN8|A0A498LJN8_LABRO Proto-oncogene DBL-like isoform X2 OS=Labeo rohita OX=84645 GN=ROHU_012155 PE=4 SV=1	Labeo rohita
A0A498LJP1	RXN08301.1	DnaJ-like protein	C	representative	0.998	0	7	0	3								A0A498LJP1	940	1				tr|A0A498LJP1|A0A498LJP1_LABRO DnaJ-like protein OS=Labeo rohita OX=84645 GN=ROHU_031918 PE=4 SV=1	Labeo rohita
A0A498LJP3	RXN08460.1	Profilin	C	canonical	1	0	2182	0	44								A0A498LJP3	941	1				tr|A0A498LJP3|A0A498LJP3_LABRO Profilin OS=Labeo rohita OX=84645 GN=ROHU_031882 PE=3 SV=1	Labeo rohita
A0A498LJN2	RXN08568.1	Kelch 15 isoform X1	C	canonical	1	0	83	0	9								A0A498LJP4	942	2				tr|A0A498LJN2|A0A498LJN2_LABRO Kelch 15 isoform X1 OS=Labeo rohita OX=84645 GN=ROHU_031752 PE=4 SV=1	Labeo rohita
A0A498LJP4	RXN08569.1	Carboxymethylenebutenolidase-like protein	C	canonical	1	0	160	0	14								A0A498LJP4	942	2				tr|A0A498LJP4|A0A498LJP4_LABRO Carboxymethylenebutenolidase-like protein OS=Labeo rohita OX=84645 GN=ROHU_031753 PE=4 SV=1	Labeo rohita
A0A498LJP6	RXN07286.1	Chloride channel protein	C	weak	0.902	0	1	0	1								A0A498LJP6	943	3				tr|A0A498LJP6|A0A498LJP6_LABRO Chloride channel protein OS=Labeo rohita OX=84645 GN=ROHU_012001 PE=3 SV=1	Labeo rohita
A0A498LJP7	RXN07733.1	Ubiquitin-ligase E3A	C	indistinguishable representative	0.999	0	115	0	21								A0A498LJP7	944	3				tr|A0A498LJP7|A0A498LJP7_LABRO Ubiquitin-ligase E3A OS=Labeo rohita OX=84645 GN=ROHU_032167 PE=3 SV=1	Labeo rohita
A0A498LJP8	RXN05705.1	Polypyrimidine tract-binding 1 isoform X2	C	canonical	1	0	260	0	37								A0A498LJP8	945	7				tr|A0A498LJP8|A0A498LJP8_LABRO Polypyrimidine tract-binding 1 isoform X2 OS=Labeo rohita OX=84645 GN=ROHU_033200 PE=4 SV=1	Labeo rohita
A0A498MJ90	RXN21408.1	Polypyrimidine tract-binding 3-like isoform X2	C	canonical	0.999	0	8	0	4								A0A498LJP8	945	7				tr|A0A498MJ90|A0A498MJ90_LABRO Polypyrimidine tract-binding 3-like isoform X2 OS=Labeo rohita OX=84645 GN=ROHU_036823 PE=4 SV=1	Labeo rohita
A0A498MXH7	RXN21355.1	Polypyrimidine tract-binding 3-like protein	C	canonical	0.999	0	14	0	3								A0A498LJP8	945	7				tr|A0A498MXH7|A0A498MXH7_LABRO Polypyrimidine tract-binding 3-like protein OS=Labeo rohita OX=84645 GN=ROHU_024276 PE=4 SV=1	Labeo rohita
A0A498N0X0	RXN27929.1	Polypyrimidine tract-binding 2-like isoform X2	C	canonical	0.999	0	65	0	17								A0A498LJP8	945	7				tr|A0A498N0X0|A0A498N0X0_LABRO Polypyrimidine tract-binding 2-like isoform X2 OS=Labeo rohita OX=84645 GN=ROHU_019670 PE=4 SV=1	Labeo rohita
A0A498N5J3	RXN25816.1	Polypyrimidine tract-binding 2-like isoform X1	C	canonical	0.999	0	32	0	11								A0A498LJP8	945	7				tr|A0A498N5J3|A0A498N5J3_LABRO Polypyrimidine tract-binding 2-like isoform X1 OS=Labeo rohita OX=84645 GN=ROHU_021163 PE=4 SV=1	Labeo rohita
A0A498NJ67		Polypyrimidine tract-binding 1-like isoform X2	C	marginally distinguished	0.999	0	59	0	7								A0A498LJP8	945	7				tr|A0A498NJ67|A0A498NJ67_LABRO Polypyrimidine tract-binding 1-like isoform X2 OS=Labeo rohita OX=84645 GN=ROHU_016510 PE=4 SV=1	Labeo rohita
A0A498LJP9	RXN06884.1	Cornichon-like protein	C	canonical	0.999	0	8	0	3								A0A498LJP9	946	1				tr|A0A498LJP9|A0A498LJP9_LABRO Cornichon-like protein OS=Labeo rohita OX=84645 GN=ROHU_012165 PE=4 SV=1	Labeo rohita
A0A498LJQ3	RXN08470.1	Proteasome subunit beta (EC 3.4.25.1)	C	canonical	1	0	403	0	18								A0A498LJQ3	947	1				tr|A0A498LJQ3|A0A498LJQ3_LABRO Proteasome subunit beta OS=Labeo rohita OX=84645 GN=ROHU_031892 PE=3 SV=1	Labeo rohita
A0A498LJQ6	RXN06894.1	Clathrin heavy chain	C	canonical	1	0	6582	0	185								A0A498LJQ6	948	5				tr|A0A498LJQ6|A0A498LJQ6_LABRO Clathrin heavy chain OS=Labeo rohita OX=84645 GN=ROHU_012175 PE=3 SV=1	Labeo rohita
A0A498N0F6	RXN27658.1	Clathrin heavy chain	C	marginally distinguished	1	0	5867	0	184								A0A498LJQ6	948	5				tr|A0A498N0F6|A0A498N0F6_LABRO Clathrin heavy chain OS=Labeo rohita OX=84645 GN=ROHU_019866 PE=3 SV=1	Labeo rohita
A0A498NHX3	RXN31453.1	Clathrin heavy chain	C	canonical	1	0	711	0	47								A0A498LJQ6	948	5				tr|A0A498NHX3|A0A498NHX3_LABRO Clathrin heavy chain OS=Labeo rohita OX=84645 GN=ROHU_016942 PE=3 SV=1	Labeo rohita
A0A498LJR2	RXN12910.1	Calpastatin-like isoform X9	C	canonical	1	0	703	0	44								A0A498LJR2	949	1				tr|A0A498LJR2|A0A498LJR2_LABRO Calpastatin-like isoform X9 OS=Labeo rohita OX=84645 GN=ROHU_029363 PE=4 SV=1	Labeo rohita
A0A498LJR5	RXN14914.1	Armadillo repeat-containing 10	C	canonical	0.999	0	8	0	5								A0A498LJR5	950	2				tr|A0A498LJR5|A0A498LJR5_LABRO Armadillo repeat-containing 10 OS=Labeo rohita OX=84645 GN=ROHU_008877 PE=4 SV=1	Labeo rohita
A0A498LJR6		DnaJ-like protein	C	indistinguishable representative	0.99	0	9	0	2								A0A498LJR6	951	3				tr|A0A498LJR6|A0A498LJR6_LABRO DnaJ-like protein OS=Labeo rohita OX=84645 GN=ROHU_012021 PE=4 SV=1	Labeo rohita
A0A498LJ78		ATP-binding cassette sub-family G member 2-like protein	C	indistinguishable representative	0.997	0	14	0	2								A0A498LJR7	952	9				tr|A0A498LJ78|A0A498LJ78_LABRO ATP-binding cassette sub-family G member 2-like protein OS=Labeo rohita OX=84645 GN=ROHU_031820 PE=4 SV=1	Labeo rohita
A0A498LJR7	RXN08480.1	F-box LRR-repeat 5	C	canonical	0.999	0	28	0	8								A0A498LJR7	952	9				tr|A0A498LJR7|A0A498LJR7_LABRO F-box LRR-repeat 5 OS=Labeo rohita OX=84645 GN=ROHU_035341 PE=4 SV=1	Labeo rohita
A0A498LJS0	RXN05867.1	Dachshund-like protein	C	canonical	0.999	0	215	0	23								A0A498LJS0	953	2				tr|A0A498LJS0|A0A498LJS0_LABRO Dachshund-like protein OS=Labeo rohita OX=84645 GN=ROHU_035557 PE=4 SV=1	Labeo rohita
A0A498L474	RXN02263.1	Furin-1-like protein	C	indistinguishable representative	0.999	0	29	0	11								A0A498LJS5	954	8				tr|A0A498L474|A0A498L474_LABRO Furin-1-like protein OS=Labeo rohita OX=84645 GN=ROHU_035099 PE=3 SV=1	Labeo rohita
A0A498LJS5	RXN12911.1	Neuroendocrine convertase 1-like isoform X1	C	canonical	0.999	0	37	0	12								A0A498LJS5	954	8				tr|A0A498LJS5|A0A498LJS5_LABRO Neuroendocrine convertase 1-like isoform X1 OS=Labeo rohita OX=84645 GN=ROHU_029364 PE=3 SV=1	Labeo rohita
A0A498MMG4		Pro convertase subtilisin kexin type 6 isoform X1	C	indistinguishable representative	0.999	0	307	0	41								A0A498LJS5	954	8				tr|A0A498MMG4|A0A498MMG4_LABRO Pro convertase subtilisin kexin type 6 isoform X1 OS=Labeo rohita OX=84645 GN=ROHU_007033 PE=3 SV=1	Labeo rohita
A0A498LJS9	RXN07763.1	Sodium-dependent phosphate transport 2B-like protein	C	canonical	0.999	0	7	0	2								A0A498LJS9	955	1				tr|A0A498LJS9|A0A498LJS9_LABRO Sodium-dependent phosphate transport 2B-like protein OS=Labeo rohita OX=84645 GN=ROHU_035442 PE=4 SV=1	Labeo rohita
A0A498LJT3	RXN12892.1	ERGIC-53	C	canonical	1	0	450	0	26								A0A498LJT3	956	1				tr|A0A498LJT3|A0A498LJT3_LABRO ERGIC-53 OS=Labeo rohita OX=84645 GN=ROHU_029345 PE=4 SV=1	Labeo rohita
A0A498LJT7	RXN07326.1	Bardet-Biedl syndrome 1	C	canonical	0.999	0	12	0	5								A0A498LJT7	957	1				tr|A0A498LJT7|A0A498LJT7_LABRO Bardet-Biedl syndrome 1 OS=Labeo rohita OX=84645 GN=ROHU_012041 PE=4 SV=1	Labeo rohita
A0A498LJU2	RXN06934.1	Solute carrier family 35 member E1-like protein	C	indistinguishable representative	0.995	0	7	0	2								A0A498LJU2	958	2				tr|A0A498LJU2|A0A498LJU2_LABRO Solute carrier family 35 member E1-like protein OS=Labeo rohita OX=84645 GN=ROHU_012215 PE=4 SV=1	Labeo rohita
A0A498LJU3	RXN05755.1	60S ribosomal L7	C	canonical	1	0	2144	0	31								A0A498LJU3	959	2				tr|A0A498LJU3|A0A498LJU3_LABRO 60S ribosomal L7 OS=Labeo rohita OX=84645 GN=ROHU_033250 PE=4 SV=1	Labeo rohita
A0A498LJU7	RXN08619.1	DnaJ-like protein	C	indistinguishable representative	0.999	0	12	0	8								A0A498LJU7	960	2				tr|A0A498LJU7|A0A498LJU7_LABRO DnaJ-like protein OS=Labeo rohita OX=84645 GN=ROHU_031739 PE=4 SV=1	Labeo rohita
A0A498LJW2	RXN07356.1	Synaptotagmin 4 isoform X1	C	weak	0.965	0	2	0	1								A0A498LJW2	961	2				tr|A0A498LJW2|A0A498LJW2_LABRO Synaptotagmin 4 isoform X1 OS=Labeo rohita OX=84645 GN=ROHU_032276 PE=4 SV=1	Labeo rohita
A0A498LJW5	RXN07803.1	Splicing factor 3A subunit 1	C	representative	0.999	0	186	0	43								A0A498LJW5	962	2				tr|A0A498LJW5|A0A498LJW5_LABRO Splicing factor 3A subunit 1 OS=Labeo rohita OX=84645 GN=ROHU_035436 PE=4 SV=1	Labeo rohita
A0A498MTI7	RXN20217.1	Splicing factor 3A subunit 1 isoform X1	C	marginally distinguished	0.999	0	187	0	43								A0A498LJW5	962	2				tr|A0A498MTI7|A0A498MTI7_LABRO Splicing factor 3A subunit 1 isoform X1 OS=Labeo rohita OX=84645 GN=ROHU_036875 PE=4 SV=1	Labeo rohita
A0A498LJW6	RXN05907.1	Magnesium transporter	C	indistinguishable representative	0.99	0	2	0	2								A0A498LJW6	963	2				tr|A0A498LJW6|A0A498LJW6_LABRO Magnesium transporter OS=Labeo rohita OX=84645 GN=ROHU_033120 PE=3 SV=1	Labeo rohita
A0A498LJW8	RXN06964.1	N-acetylglucosamine-1-phosphodiester alpha-N-acetylglucosaminidase-like protein	C	canonical	0.999	0	6	0	5								A0A498LJW8	964	2				tr|A0A498LJW8|A0A498LJW8_LABRO N-acetylglucosamine-1-phosphodiester alpha-N-acetylglucosaminidase-like protein OS=Labeo rohita OX=84645 GN=ROHU_032580 PE=4 SV=1	Labeo rohita
A0A498LJY6		MLN64 N-terminal domain-like protein	C	weak	0.835	0	1	0	1								A0A498LJY6	965	1				tr|A0A498LJY6|A0A498LJY6_LABRO MLN64 N-terminal domain-like protein OS=Labeo rohita OX=84645 GN=ROHU_024230 PE=4 SV=1	Labeo rohita
A0A498LJY8	RXN27229.1	Mitochondrial inner membrane protease ATP23 (EC 3.4.24.-)	C	canonical	1	0	21	0	7								A0A498LJY8	966	1				tr|A0A498LJY8|A0A498LJY8_LABRO Mitochondrial inner membrane protease ATP23 OS=Labeo rohita OX=84645 GN=ROHU_020220 PE=3 SV=1	Labeo rohita
A0A498LJZ7	RXN05805.1	Dermatan-sulfate epimerase	C	representative	0.997	0	3	0	2								A0A498LJZ7	967	1				tr|A0A498LJZ7|A0A498LJZ7_LABRO Dermatan-sulfate epimerase OS=Labeo rohita OX=84645 GN=ROHU_035570 PE=4 SV=1	Labeo rohita
A0A498LK00	RXN08726.1	15 kDa seleno	C	canonical	1	0	33	0	4								A0A498LK00	968	1				tr|A0A498LK00|A0A498LK00_LABRO 15 kDa seleno OS=Labeo rohita OX=84645 GN=ROHU_007304 PE=4 SV=1	Labeo rohita
A0A498LK03	RXN07396.1	ATP1B4-like isoform X2	C	canonical	1	0	200	0	15								A0A498LK03	969	1				tr|A0A498LK03|A0A498LK03_LABRO ATP1B4-like isoform X2 OS=Labeo rohita OX=84645 GN=ROHU_032316 PE=4 SV=1	Labeo rohita
A0A498LK15	RXN08570.1	T-complex 1 subunit epsilon	C	canonical	1	0	1697	0	60								A0A498LK15	970	1				tr|A0A498LK15|A0A498LK15_LABRO T-complex 1 subunit epsilon OS=Labeo rohita OX=84645 GN=ROHU_031754 PE=3 SV=1	Labeo rohita
A0A498LK20	RXN08708.1	Niban-like protein	C	canonical	0.999	0	226	0	23								A0A498LK20	971	4				tr|A0A498LK20|A0A498LK20_LABRO Niban-like protein OS=Labeo rohita OX=84645 GN=ROHU_008047 PE=4 SV=1	Labeo rohita
A0A498LWP2	RXN12939.1	Niban 1	C	canonical	0.999	0	21	0	11								A0A498LK20	971	4				tr|A0A498LWP2|A0A498LWP2_LABRO Niban 1 OS=Labeo rohita OX=84645 GN=ROHU_029392 PE=4 SV=1	Labeo rohita
A0A498LZ60	RXN10437.1	Niban 1	C	canonical	0.999	0	134	0	23								A0A498LK20	971	4				tr|A0A498LZ60|A0A498LZ60_LABRO Niban 1 OS=Labeo rohita OX=84645 GN=ROHU_037365 PE=4 SV=1	Labeo rohita
A0A498MC09		Niban-like protein	C	canonical	0.999	0	26	0	8								A0A498LK20	971	4				tr|A0A498MC09|A0A498MC09_LABRO Niban-like protein OS=Labeo rohita OX=84645 GN=ROHU_027301 PE=4 SV=1	Labeo rohita
A0A498LK22	RXN07024.1	Syntabulin-like isoform X1	C	canonical	0.998	0	3	0	3								A0A498LK22	972	1				tr|A0A498LK22|A0A498LK22_LABRO Syntabulin-like isoform X1 OS=Labeo rohita OX=84645 GN=ROHU_012072 PE=4 SV=1	Labeo rohita
A0A498LK37	RXN08441.1	FH2 domain-containing 1-like protein	C	canonical	0.999	0	28	0	7								A0A498LK37	973	1				tr|A0A498LK37|A0A498LK37_LABRO FH2 domain-containing 1-like protein OS=Labeo rohita OX=84645 GN=ROHU_031863 PE=4 SV=1	Labeo rohita
A0A498LK47	RXN08451.1	Sodium potassium-transporting ATPase subunit beta-2-like protein	C	canonical	1	0	248	0	8								A0A498LK47	974	1				tr|A0A498LK47|A0A498LK47_LABRO Sodium potassium-transporting ATPase subunit beta-2-like protein OS=Labeo rohita OX=84645 GN=ROHU_031873 PE=4 SV=1	Labeo rohita
A0A498LK56		Collagen triple helix repeat-containing	C	weak	0.995	0	1	0	1								A0A498LK56	975	1				tr|A0A498LK56|A0A498LK56_LABRO Collagen triple helix repeat-containing OS=Labeo rohita OX=84645 GN=ROHU_031883 PE=4 SV=1	Labeo rohita
A0A498LK58	RXN08702.1	Cysteine N-palmitoyltransferase HHAT isoform X2	C	canonical	0.999	0	48	0	11								A0A498LK58	976	2				tr|A0A498LK58|A0A498LK58_LABRO Cysteine N-palmitoyltransferase HHAT isoform X2 OS=Labeo rohita OX=84645 GN=ROHU_031644 PE=3 SV=1	Labeo rohita
A0A498LK62	RXN07064.1	C-C motif chemokine	C	indistinguishable representative	1	0	245	0	27								A0A498LK62	977	2				tr|A0A498LK62|A0A498LK62_LABRO C-C motif chemokine OS=Labeo rohita OX=84645 GN=ROHU_032454 PE=3 SV=1	Labeo rohita
A0A498LK64	RXN05844.1	Neuroplastin-like isoform X1	C	canonical	0.999	0	91	0	11								A0A498LK64	978	9				tr|A0A498LK64|A0A498LK64_LABRO Neuroplastin-like isoform X1 OS=Labeo rohita OX=84645 GN=ROHU_012546 PE=4 SV=1	Labeo rohita
A0A498MBN5	RXN17223.1	Potassium sodium hyperpolarization-activated cyclic nucleotide-gated channel 3-like protein	C	canonical	0.999	0	46	0	7								A0A498LK64	978	9				tr|A0A498MBN5|A0A498MBN5_LABRO Potassium sodium hyperpolarization-activated cyclic nucleotide-gated channel 3-like protein OS=Labeo rohita OX=84645 GN=ROHU_008081 PE=4 SV=1	Labeo rohita
A0A498LK66	RXN08471.1	Platelet glyco Ib alpha chain-like protein	C	weak	0.979	0	2	0	1								A0A498LK66	979	1				tr|A0A498LK66|A0A498LK66_LABRO Platelet glyco Ib alpha chain-like protein OS=Labeo rohita OX=84645 GN=ROHU_031893 PE=4 SV=1	Labeo rohita
A0A498LK72	RXN08759.1	Regulator of G-signaling 7 isoform X1	C	canonical	0.999	0	100	0	22								A0A498LK72	980	2				tr|A0A498LK72|A0A498LK72_LABRO Regulator of G-signaling 7 isoform X1 OS=Labeo rohita OX=84645 GN=ROHU_031586 PE=4 SV=1	Labeo rohita
A0A498LLK2	RXN08891.1	Regulator of G-signaling 7 isoform X1	C	canonical	0.999	0	101	0	19								A0A498LK72	980	2				tr|A0A498LLK2|A0A498LLK2_LABRO Regulator of G-signaling 7 isoform X1 OS=Labeo rohita OX=84645 GN=ROHU_011430 PE=4 SV=1	Labeo rohita
A0A498LK73	RXN06007.1	Phospholipase A(2) (EC 3.1.1.4)	C	canonical	0.999	0	20	0	6								A0A498LK73	981	1				tr|A0A498LK73|A0A498LK73_LABRO Phospholipase A(2) OS=Labeo rohita OX=84645 GN=ROHU_012488 PE=3 SV=1	Labeo rohita
A0A498LK75	RXN08630.1	UDP-galactose translocator-like protein	C	weak	0.982	0	2	0	1								A0A498LK75	982	1				tr|A0A498LK75|A0A498LK75_LABRO UDP-galactose translocator-like protein OS=Labeo rohita OX=84645 GN=ROHU_019204 PE=4 SV=1	Labeo rohita
A0A498LK78	RXN07084.1	Calcineurin B-like protein	C	indistinguishable representative	1	0	2	0	2								A0A498LK78	983	2				tr|A0A498LK78|A0A498LK78_LABRO Calcineurin B-like protein OS=Labeo rohita OX=84645 GN=ROHU_032474 PE=4 SV=1	Labeo rohita
A0A498LK79	RXN08769.1	Inactive carboxypeptidase X2	C	weak	0.983	0	36	0	1								A0A498LK79	984	1				tr|A0A498LK79|A0A498LK79_LABRO Inactive carboxypeptidase X2 OS=Labeo rohita OX=84645 GN=ROHU_031596 PE=4 SV=1	Labeo rohita
A0A498LK83	RXN06017.1	Gamma-glutamyltransferase 5-like protein	C	canonical	1	0	102	0	11								A0A498LK83	985	1				tr|A0A498LK83|A0A498LK83_LABRO Gamma-glutamyltransferase 5-like protein OS=Labeo rohita OX=84645 GN=ROHU_008673 PE=4 SV=1	Labeo rohita
A0A498LKA4	RXN07953.1	Transcription elongation factor SPT5	C	representative	0.999	0	48	0	14								A0A498LKA4	986	2				tr|A0A498LKA4|A0A498LKA4_LABRO Transcription elongation factor SPT5 OS=Labeo rohita OX=84645 GN=ROHU_032041 PE=3 SV=1	Labeo rohita
A0A498LKA7		CUGBP Elav-like family member 5	C	indistinguishable representative	0.999	0	3	0	3								A0A498LKA7	987	6				tr|A0A498LKA7|A0A498LKA7_LABRO CUGBP Elav-like family member 5 OS=Labeo rohita OX=84645 GN=ROHU_033100 PE=4 SV=1	Labeo rohita
A0A498LND6	RXN09561.1	CUGBP Elav-like family member 4	C	indistinguishable representative	0.999	0	2	0	2								A0A498LKA7	987	6				tr|A0A498LND6|A0A498LND6_LABRO CUGBP Elav-like family member 4 OS=Labeo rohita OX=84645 GN=ROHU_010979 PE=4 SV=1	Labeo rohita
A0A498L2G3	RXN02409.1	Proteasome subunit beta type-8-like protein	C	representative	1	0	171	0	20								A0A498LKB6	988	4				tr|A0A498L2G3|A0A498L2G3_LABRO Proteasome subunit beta type-8-like protein OS=Labeo rohita OX=84645 GN=ROHU_035022 PE=4 SV=1	Labeo rohita
A0A498LKB6	RXN08660.1	Proteasome subunit beta (EC 3.4.25.1)	C	canonical	1	0	303	0	17								A0A498LKB6	988	4				tr|A0A498LKB6|A0A498LKB6_LABRO Proteasome subunit beta OS=Labeo rohita OX=84645 GN=ROHU_027620 PE=3 SV=1	Labeo rohita
A0A498P5Y7	RXN14629.1	Proteasome subunit beta type-8-like protein	C	canonical	1	0	183	0	20								A0A498LKB6	988	4				tr|A0A498P5Y7|A0A498P5Y7_LABRO Proteasome subunit beta type-8-like protein OS=Labeo rohita OX=84645 GN=ROHU_000154 PE=4 SV=1	Labeo rohita
A0A498LKB7	RXN07134.1	N-chimaerin	C	canonical	0.999	0	17	0	5								A0A498LKB7	989	2				tr|A0A498LKB7|A0A498LKB7_LABRO N-chimaerin OS=Labeo rohita OX=84645 GN=ROHU_032524 PE=4 SV=1	Labeo rohita
A0A498NNQ8	RXN33408.1	Beta-chimaerin-like isoform X2	C	canonical	0.999	0	10	0	5								A0A498LKB7	989	2				tr|A0A498NNQ8|A0A498NNQ8_LABRO Beta-chimaerin-like isoform X2 OS=Labeo rohita OX=84645 GN=ROHU_015658 PE=4 SV=1	Labeo rohita
A0A498LKC6	RXN08848.1	Titin-like isoform X1	C	canonical	0.999	0	72	0	27								A0A498LKC6	990	13				tr|A0A498LKC6|A0A498LKC6_LABRO Titin-like isoform X1 OS=Labeo rohita OX=84645 GN=ROHU_011387 PE=4 SV=1	Labeo rohita
A0A498M2U7	RXN14173.1	Serine threonine-kinase Nek5-like isoform X1	C	marginally distinguished	0.999	0	9	0	2								A0A498LKC6	990	13				tr|A0A498M2U7|A0A498M2U7_LABRO Serine threonine-kinase Nek5-like isoform X1 OS=Labeo rohita OX=84645 GN=ROHU_009174 PE=4 SV=1	Labeo rohita
A0A498MAK6	RXN14177.1	Serine threonine-kinase Nek5-like isoform X1	C	canonical	0.999	0	23	0	9								A0A498LKC6	990	13				tr|A0A498MAK6|A0A498MAK6_LABRO Serine threonine-kinase Nek5-like isoform X1 OS=Labeo rohita OX=84645 GN=ROHU_009178 PE=4 SV=1	Labeo rohita
A0A498LKC7	RXN07466.1	Dual specificity phosphatase 23	C	canonical	1	0	7	0	3								A0A498LKC7	991	3				tr|A0A498LKC7|A0A498LKC7_LABRO Dual specificity phosphatase 23 OS=Labeo rohita OX=84645 GN=ROHU_023068 PE=4 SV=1	Labeo rohita
A0A498NAA9		Transcriptional-regulating factor 1-like protein	C	indistinguishable representative	0.999	0	3	0	2								A0A498LKC7	991	3				tr|A0A498NAA9|A0A498NAA9_LABRO Transcriptional-regulating factor 1-like protein OS=Labeo rohita OX=84645 GN=ROHU_018459 PE=4 SV=1	Labeo rohita
A0A498LKC9		E3 ubiquitin-ligase DTX4-like protein	C	weak	0.785	0	1	0	1								A0A498LKC9	992	2				tr|A0A498LKC9|A0A498LKC9_LABRO E3 ubiquitin-ligase DTX4-like protein OS=Labeo rohita OX=84645 GN=ROHU_024009 PE=4 SV=1	Labeo rohita
A0A498LKD6	RXN07993.1	Zinc finger Ran-binding domain-containing 2-like isoform X2	C	indistinguishable representative	0.996	0	2	0	2								A0A498LKD6	993	2				tr|A0A498LKD6|A0A498LKD6_LABRO Zinc finger Ran-binding domain-containing 2-like isoform X2 OS=Labeo rohita OX=84645 GN=ROHU_011679 PE=4 SV=1	Labeo rohita
A0A498LKF0	RXN08878.1	HHIP 1	C	canonical	0.998	0	6	0	3								A0A498LKF0	994	1				tr|A0A498LKF0|A0A498LKF0_LABRO HHIP 1 OS=Labeo rohita OX=84645 GN=ROHU_011417 PE=4 SV=1	Labeo rohita
A0A498LKF2	RXN08869.1	Stonin-2-like isoform X1	C	canonical	0.999	0	12	0	3								A0A498LKF2	995	1				tr|A0A498LKF2|A0A498LKF2_LABRO Stonin-2-like isoform X1 OS=Labeo rohita OX=84645 GN=ROHU_011408 PE=4 SV=1	Labeo rohita
A0A498LKF9	RXN06107.1	Histamine N-methyltransferase	C	indistinguishable representative	0.999	0	50	0	6								A0A498LKF9	996	2				tr|A0A498LKF9|A0A498LKF9_LABRO Histamine N-methyltransferase OS=Labeo rohita OX=84645 GN=ROHU_033076 PE=4 SV=1	Labeo rohita
A0A498LKG2	RXN08879.1	Histone-lysine N-methyltransferase setd3	C	canonical	0.999	0	87	0	26								A0A498LKG2	997	1				tr|A0A498LKG2|A0A498LKG2_LABRO Histone-lysine N-methyltransferase setd3 OS=Labeo rohita OX=84645 GN=ROHU_011418 PE=4 SV=1	Labeo rohita
A0A498LKH3	RXN08908.1	WW domain-binding 2	C	canonical	1	0	157	0	11								A0A498LKH3	998	1				tr|A0A498LKH3|A0A498LKH3_LABRO WW domain-binding 2 OS=Labeo rohita OX=84645 GN=ROHU_011447 PE=4 SV=1	Labeo rohita
A0A498LKH6	RXN07516.1	La-related 7	C	indistinguishable representative	0.999	0	57	0	24								A0A498LKH6	999	2				tr|A0A498LKH6|A0A498LKH6_LABRO La-related 7 OS=Labeo rohita OX=84645 GN=ROHU_011932 PE=4 SV=1	Labeo rohita
A0A498LKH7	RXN07204.1	Guanine nucleotide-binding protein subunit gamma	C	representative	0.996	0	4	0	2								A0A498LKH7	1000	2				tr|A0A498LKH7|A0A498LKH7_LABRO Guanine nucleotide-binding protein subunit gamma OS=Labeo rohita OX=84645 GN=ROHU_032414 PE=3 SV=1	Labeo rohita
A0A498LKI5	RXN07526.1	Leukocyte cell-derived chemotaxin-2-like protein	C	indistinguishable representative	1	0	127	0	8								A0A498LKI5	1001	2				tr|A0A498LKI5|A0A498LKI5_LABRO Leukocyte cell-derived chemotaxin-2-like protein OS=Labeo rohita OX=84645 GN=ROHU_011942 PE=4 SV=1	Labeo rohita
A0A498LKJ0	RXN19305.1	Carbonic anhydrase-related	C	canonical	1	0	212	0	16								A0A498LKJ0	1002	1				tr|A0A498LKJ0|A0A498LKJ0_LABRO Carbonic anhydrase-related OS=Labeo rohita OX=84645 GN=ROHU_007308 PE=3 SV=1	Labeo rohita
A0A498LKJ5	RXN07536.1	Nuclear receptor-interacting 1-like protein	C	canonical	1	0	393	0	23								A0A498LKJ5	1003	1				tr|A0A498LKJ5|A0A498LKJ5_LABRO Nuclear receptor-interacting 1-like protein OS=Labeo rohita OX=84645 GN=ROHU_032228 PE=4 SV=1	Labeo rohita
A0A498LKJ6	RXN30810.1	Heat shock beta-8	C	canonical	0.999	0	13	0	6								A0A498LKJ6	1004	1				tr|A0A498LKJ6|A0A498LKJ6_LABRO Heat shock beta-8 OS=Labeo rohita OX=84645 GN=ROHU_017480 PE=3 SV=1	Labeo rohita
A0A498LKJ7	RXN06147.1	Monocarboxylate transporter 10	C	canonical	0.997	0	6	0	3								A0A498LKJ7	1005	1				tr|A0A498LKJ7|A0A498LKJ7_LABRO Monocarboxylate transporter 10 OS=Labeo rohita OX=84645 GN=ROHU_012425 PE=4 SV=1	Labeo rohita
A0A498LKL1	RXN08750.1	Matrix metallo ase-21	C	canonical	0.999	0	21	0	6								A0A498LKL1	1006	1				tr|A0A498LKL1|A0A498LKL1_LABRO Matrix metallo ase-21 OS=Labeo rohita OX=84645 GN=ROHU_031577 PE=3 SV=1	Labeo rohita
A0A498LKL4		E3 ubiquitin-ligase TRIM71	C	weak	0.987	0	1	0	1								A0A498LKL4	1007	1				tr|A0A498LKL4|A0A498LKL4_LABRO E3 ubiquitin-ligase TRIM71 OS=Labeo rohita OX=84645 GN=ROHU_012531 PE=4 SV=1	Labeo rohita
A0A498LKL7	RXN08958.1	NADH dehydrogenase [ubiquinone] 1 beta subcomplex subunit mitochondrial	C	canonical	1	0	279	0	16								A0A498LKL7	1008	1				tr|A0A498LKL7|A0A498LKL7_LABRO NADH dehydrogenase [ubiquinone] 1 beta subcomplex subunit mitochondrial OS=Labeo rohita OX=84645 GN=ROHU_011497 PE=4 SV=1	Labeo rohita
A0A498LKM0	RXN06167.1	Isoform X6	C	canonical	0.994	0	22	0	3								A0A498LKM0	1009	1				tr|A0A498LKM0|A0A498LKM0_LABRO Isoform X6 OS=Labeo rohita OX=84645 GN=ROHU_012445 PE=4 SV=1	Labeo rohita
A0A498LKM6	RXN07254.1	Bifunctional heparan sulfate N-deacetylase N-sulfotransferase 1-like protein	C	canonical	1	0	1286	0	27								A0A498LKM6	1010	1				tr|A0A498LKM6|A0A498LKM6_LABRO Bifunctional heparan sulfate N-deacetylase N-sulfotransferase 1-like protein OS=Labeo rohita OX=84645 GN=ROHU_011969 PE=3 SV=1	Labeo rohita
A0A498LKN0		Methionine synthase reductase isoform X2	C	weak	0.96	0	1	0	1								A0A498LKN0	1011	1				tr|A0A498LKN0|A0A498LKN0_LABRO Methionine synthase reductase isoform X2 OS=Labeo rohita OX=84645 GN=ROHU_031755 PE=4 SV=1	Labeo rohita
A0A498LKN2	RXN08949.1	Neuropeptide FF receptor 1	C	representative	0.999	0	5	0	3								A0A498LKN2	1012	1				tr|A0A498LKN2|A0A498LKN2_LABRO Neuropeptide FF receptor 1 OS=Labeo rohita OX=84645 GN=ROHU_011488 PE=3 SV=1	Labeo rohita
A0A498LKN3	RXN05985.1	Niemann-Pick C1 1	C	indistinguishable representative	0.994	0	5	0	3								A0A498LKN3	1013	2				tr|A0A498LKN3|A0A498LKN3_LABRO Niemann-Pick C1 1 OS=Labeo rohita OX=84645 GN=ROHU_033106 PE=4 SV=1	Labeo rohita
A0A498LKN6		Sphingomyelin synthase-related 1	C	weak	0.989	0	1	0	1								A0A498LKN6	1014	2				tr|A0A498LKN6|A0A498LKN6_LABRO Sphingomyelin synthase-related 1 OS=Labeo rohita OX=84645 GN=ROHU_035311 PE=4 SV=1	Labeo rohita
A0A498LKN7	RXN07264.1	Monooxygenase p33MONOX isoform X1	C	canonical	0.999	0	64	0	16								A0A498LKN7	1015	1				tr|A0A498LKN7|A0A498LKN7_LABRO Monooxygenase p33MONOX isoform X1 OS=Labeo rohita OX=84645 GN=ROHU_011979 PE=4 SV=1	Labeo rohita
A0A498LKN9		RPE-retinal G-coupled receptor-like protein	C	insufficient evidence	0.99	0	8	0	1								A0A498LKN9	1016	1				tr|A0A498LKN9|A0A498LKN9_LABRO RPE-retinal G-coupled receptor-like protein OS=Labeo rohita OX=84645 GN=ROHU_031607 PE=4 SV=1	Labeo rohita
A0A498LKP6	RXN08988.1	ES1 mitochondrial	C	canonical	1	0	939	0	65								A0A498LKP6	1017	1				tr|A0A498LKP6|A0A498LKP6_LABRO ES1 mitochondrial OS=Labeo rohita OX=84645 GN=ROHU_031568 PE=4 SV=1	Labeo rohita
A0A498LKQ6		Tapasin-related-like protein	C	indistinguishable representative	0.999	0	20	0	6								A0A498LKQ6	1018	2				tr|A0A498LKQ6|A0A498LKQ6_LABRO Tapasin-related-like protein OS=Labeo rohita OX=84645 GN=ROHU_011826 PE=4 SV=1	Labeo rohita
A0A498LKS0	RXN08133.1	F-box only 7	C	indistinguishable representative	0.998	0	6	0	2								A0A498LKS0	1019	2				tr|A0A498LKS0|A0A498LKS0_LABRO F-box only 7 OS=Labeo rohita OX=84645 GN=ROHU_031956 PE=4 SV=1	Labeo rohita
A0A498LKS9	RXN18693.1	Lamin-B receptor	C	canonical	1	0	157	0	16								A0A498LKS9	1020	1				tr|A0A498LKS9|A0A498LKS9_LABRO Lamin-B receptor OS=Labeo rohita OX=84645 GN=ROHU_007649 PE=4 SV=1	Labeo rohita
A0A498LKT2		Monocarboxylate transporter 1-like protein	C	weak	0.955	0	1	0	1								A0A498LKT2	1021	1				tr|A0A498LKT2|A0A498LKT2_LABRO Monocarboxylate transporter 1-like protein OS=Labeo rohita OX=84645 GN=ROHU_020094 PE=4 SV=1	Labeo rohita
A0A498LKT3	RXN27420.1	Cathepsin Z-like protein	C	canonical	1	0	304	0	17								A0A498LKT3	1022	2				tr|A0A498LKT3|A0A498LKT3_LABRO Cathepsin Z-like protein OS=Labeo rohita OX=84645 GN=ROHU_020112 PE=3 SV=1	Labeo rohita
A0A498N921	RXN25157.1	Cathepsin Z-like protein	C	canonical	1	0	105	0	12								A0A498LKT3	1022	2				tr|A0A498N921|A0A498N921_LABRO Cathepsin Z-like protein OS=Labeo rohita OX=84645 GN=ROHU_021706 PE=3 SV=1	Labeo rohita
A0A498LKT6	RXN07314.1	Ependymin-like protein	C	canonical	1	0	171	0	6								A0A498LKT6	1023	1				tr|A0A498LKT6|A0A498LKT6_LABRO Ependymin-like protein OS=Labeo rohita OX=84645 GN=ROHU_012029 PE=4 SV=1	Labeo rohita
A0A498LKT8	RXN08153.1	Transmembrane 7 superfamily member 3-like protein	C	weak	0.984	0	4	0	1								A0A498LKT8	1024	2				tr|A0A498LKT8|A0A498LKT8_LABRO Transmembrane 7 superfamily member 3-like protein OS=Labeo rohita OX=84645 GN=ROHU_031976 PE=4 SV=1	Labeo rohita
A0A498LKU3		Phosphatidylinositol glycan anchor biosynthesis class U	C	weak	0.984	0	2	0	1								A0A498LKU3	1025	1				tr|A0A498LKU3|A0A498LKU3_LABRO Phosphatidylinositol glycan anchor biosynthesis class U OS=Labeo rohita OX=84645 GN=ROHU_031561 PE=4 SV=1	Labeo rohita
A0A498LKU8	RXN06247.1	Peroxisomal biogenesis factor 3	C	weak	0.934	0	1	0	1								A0A498LKU8	1026	1				tr|A0A498LKU8|A0A498LKU8_LABRO Peroxisomal biogenesis factor 3 OS=Labeo rohita OX=84645 GN=ROHU_032971 PE=4 SV=1	Labeo rohita
A0A498LKV4		Anoctamin	C	canonical	0.999	0	5	0	5								A0A498LKV4	1027	1				tr|A0A498LKV4|A0A498LKV4_LABRO Anoctamin OS=Labeo rohita OX=84645 GN=ROHU_035395 PE=3 SV=1	Labeo rohita
A0A498LKV6	RXN07646.1	Sterile alpha and TIR motif-containing 1	C	canonical	0.999	0	27	0	12								A0A498LKV6	1028	1				tr|A0A498LKV6|A0A498LKV6_LABRO Sterile alpha and TIR motif-containing 1 OS=Labeo rohita OX=84645 GN=ROHU_011876 PE=4 SV=1	Labeo rohita
A0A498LKV8	RXN06257.1	Superoxide dismutase (EC 1.15.1.1)	C	canonical	1	0	782	0	27								A0A498LKV8	1029	1				tr|A0A498LKV8|A0A498LKV8_LABRO Superoxide dismutase OS=Labeo rohita OX=84645 GN=ROHU_027244 PE=3 SV=1	Labeo rohita
A0A498LKV9	RXN06065.1	Menin	C	canonical	0.994	0	5	0	2								A0A498LKV9	1030	1				tr|A0A498LKV9|A0A498LKV9_LABRO Menin OS=Labeo rohita OX=84645 GN=ROHU_033034 PE=4 SV=1	Labeo rohita
A0A498LKW1		Na(+) H(+) exchange regulatory cofactor NHE-RF2	C	weak	0.974	0	2	0	1								A0A498LKW1	1031	2				tr|A0A498LKW1|A0A498LKW1_LABRO Na(+) H(+) exchange regulatory cofactor NHE-RF2 OS=Labeo rohita OX=84645 GN=ROHU_011190 PE=4 SV=1	Labeo rohita
A0A498LKW4	RXN08860.1	Nesprin-3-like isoform X1	C	canonical	0.994	0	7	0	5								A0A498LKW4	1032	1				tr|A0A498LKW4|A0A498LKW4_LABRO Nesprin-3-like isoform X1 OS=Labeo rohita OX=84645 GN=ROHU_011399 PE=3 SV=1	Labeo rohita
A0A498LKX2	RXN07354.1	Phosphatase Slingshot-like protein	C	canonical	1	0	37	0	6								A0A498LKX2	1033	1				tr|A0A498LKX2|A0A498LKX2_LABRO Phosphatase Slingshot-like protein OS=Labeo rohita OX=84645 GN=ROHU_032274 PE=4 SV=1	Labeo rohita
A0A498LKX5		Cartilage acidic 1-like isoform X2	C	indistinguishable representative	0.999	0	10	0	4								A0A498LKX5	1034	2				tr|A0A498LKX5|A0A498LKX5_LABRO Cartilage acidic 1-like isoform X2 OS=Labeo rohita OX=84645 GN=ROHU_011181 PE=4 SV=1	Labeo rohita
A0A498LKY7	RXN16795.1	Papilin-like protein	C	canonical	1	0	238	0	39								A0A498LKY7	1035	2				tr|A0A498LKY7|A0A498LKY7_LABRO Papilin-like protein OS=Labeo rohita OX=84645 GN=ROHU_027272 PE=4 SV=1	Labeo rohita
A0A498N304	RXN26202.1	Papilin isoform X1	C	canonical	0.999	0	24	0	12								A0A498LKY7	1035	2				tr|A0A498N304|A0A498N304_LABRO Papilin isoform X1 OS=Labeo rohita OX=84645 GN=ROHU_036486 PE=4 SV=1	Labeo rohita
A0A498LKZ2	RXN09078.1	Interferon-inducible Gig1	C	canonical	0.999	0	33	0	7								A0A498LKZ2	1036	1				tr|A0A498LKZ2|A0A498LKZ2_LABRO Interferon-inducible Gig1 OS=Labeo rohita OX=84645 GN=ROHU_011220 PE=4 SV=1	Labeo rohita
A0A498LKZ6		WD repeat-containing 81	C	weak	0.963	0	2	0	1								A0A498LKZ6	1037	1				tr|A0A498LKZ6|A0A498LKZ6_LABRO WD repeat-containing 81 OS=Labeo rohita OX=84645 GN=ROHU_035456 PE=4 SV=1	Labeo rohita
A0A498LL00	RXN09069.1	COMM domain-containing 1-like protein	C	weak	0.999	0	1	0	1								A0A498LL00	1038	1				tr|A0A498LL00|A0A498LL00_LABRO COMM domain-containing 1-like protein OS=Labeo rohita OX=84645 GN=ROHU_011211 PE=4 SV=1	Labeo rohita
A0A498LL03	RXN09088.1	Coiled-coil domain-containing 86-like protein	C	canonical	0.999	0	3	0	2								A0A498LL03	1039	1				tr|A0A498LL03|A0A498LL03_LABRO Coiled-coil domain-containing 86-like protein OS=Labeo rohita OX=84645 GN=ROHU_011230 PE=4 SV=1	Labeo rohita
A0A498LL04	RXN07384.1	Eva-1-like protein	C	weak	0.998	0	2	0	1								A0A498LL04	1040	1				tr|A0A498LL04|A0A498LL04_LABRO Eva-1-like protein OS=Labeo rohita OX=84645 GN=ROHU_032304 PE=4 SV=1	Labeo rohita
A0A498LL07	RXN08910.1	39S ribosomal mitochondrial	C	canonical	0.999	0	7	0	4								A0A498LL07	1041	1				tr|A0A498LL07|A0A498LL07_LABRO 39S ribosomal mitochondrial OS=Labeo rohita OX=84645 GN=ROHU_011449 PE=4 SV=1	Labeo rohita
A0A498LL08	RXN09079.1	Oxysterol-binding protein	C	canonical	1	0	275	0	36								A0A498LL08	1042	3				tr|A0A498LL08|A0A498LL08_LABRO Oxysterol-binding protein OS=Labeo rohita OX=84645 GN=ROHU_011221 PE=3 SV=1	Labeo rohita
A0A498MJU4	RXN21341.1	Oxysterol-binding protein	C	canonical	0.999	0	25	0	10								A0A498LL08	1042	3				tr|A0A498MJU4|A0A498MJU4_LABRO Oxysterol-binding protein OS=Labeo rohita OX=84645 GN=ROHU_024262 PE=3 SV=1	Labeo rohita
A0A498NJD9	RXN32050.1	Oxysterol-binding protein	C	canonical	0.999	0	65	0	16								A0A498LL08	1042	3				tr|A0A498NJD9|A0A498NJD9_LABRO Oxysterol-binding protein OS=Labeo rohita OX=84645 GN=ROHU_016479 PE=3 SV=1	Labeo rohita
A0A498LL11	RXN09098.1	RING finger 11-like protein	C	weak	0.949	0	2	0	1								A0A498LL11	1043	2				tr|A0A498LL11|A0A498LL11_LABRO RING finger 11-like protein OS=Labeo rohita OX=84645 GN=ROHU_011240 PE=4 SV=1	Labeo rohita
A0A498LL25	RXN07404.1	Disks large-like protein	C	canonical	0.999	0	217	0	34								A0A498LL25	1044	7				tr|A0A498LL25|A0A498LL25_LABRO Disks large-like protein OS=Labeo rohita OX=84645 GN=ROHU_032324 PE=3 SV=1	Labeo rohita
A0A498LP01	RXN08494.1	7SK snRNA methylphosphate capping enzyme-like protein	C	canonical	0.999	0	73	0	14								A0A498LL25	1044	7				tr|A0A498LP01|A0A498LP01_LABRO 7SK snRNA methylphosphate capping enzyme-like protein OS=Labeo rohita OX=84645 GN=ROHU_035355 PE=4 SV=1	Labeo rohita
A0A498LZT9	RXN12882.1	Discs large-like protein	C	representative	0.999	0	133	0	27								A0A498LL25	1044	7				tr|A0A498LZT9|A0A498LZT9_LABRO Discs large-like protein OS=Labeo rohita OX=84645 GN=ROHU_029335 PE=3 SV=1	Labeo rohita
A0A498M390	RXN11767.1	Disks large-like protein	C	canonical	0.999	0	110	0	26								A0A498LL25	1044	7				tr|A0A498M390|A0A498M390_LABRO Disks large-like protein OS=Labeo rohita OX=84645 GN=ROHU_029916 PE=4 SV=1	Labeo rohita
A0A498M5K2	RXN15163.1	Disks large-like protein	C	canonical	0.999	0	145	0	25								A0A498LL25	1044	7				tr|A0A498M5K2|A0A498M5K2_LABRO Disks large-like protein OS=Labeo rohita OX=84645 GN=ROHU_008837 PE=4 SV=1	Labeo rohita
A0A498LL29	RXN29372.1	TRAF3-interacting JNK-activating modulator-like protein	C	canonical	0.999	0	3	0	2								A0A498LL29	1045	1				tr|A0A498LL29|A0A498LL29_LABRO TRAF3-interacting JNK-activating modulator-like protein OS=Labeo rohita OX=84645 GN=ROHU_018498 PE=4 SV=1	Labeo rohita
A0A498LL31		Stathmin	C	indistinguishable representative	1	0	133	0	10								A0A498LL31	1046	2				tr|A0A498LL31|A0A498LL31_LABRO Stathmin OS=Labeo rohita OX=84645 GN=ROHU_032199 PE=3 SV=1	Labeo rohita
A0A498LL32	RXN08253.1	Collectrin	C	representative	0.999	0	3	0	3								A0A498LL32	1047	2				tr|A0A498LL32|A0A498LL32_LABRO Collectrin OS=Labeo rohita OX=84645 GN=ROHU_011586 PE=4 SV=1	Labeo rohita
A0A498LL34	RXN07414.1	Arrestin-C isoform X1	C	canonical	0.999	0	43	0	14								A0A498LL34	1048	1				tr|A0A498LL34|A0A498LL34_LABRO Arrestin-C isoform X1 OS=Labeo rohita OX=84645 GN=ROHU_032334 PE=4 SV=1	Labeo rohita
A0A498LL35	RXN09109.1	NADH dehydrogenase [ubiquinone] 1 alpha subcomplex assembly factor 5	C	canonical	0.999	0	18	0	6								A0A498LL35	1049	1				tr|A0A498LL35|A0A498LL35_LABRO NADH dehydrogenase [ubiquinone] 1 alpha subcomplex assembly factor 5 OS=Labeo rohita OX=84645 GN=ROHU_011251 PE=4 SV=1	Labeo rohita
A0A498LL36	RXN06327.1	Prepronociceptin-like protein	C	insufficient evidence	0.81	0	1	0	1								A0A498LL36	1050	1				tr|A0A498LL36|A0A498LL36_LABRO Prepronociceptin-like protein OS=Labeo rohita OX=84645 GN=ROHU_027312 PE=4 SV=1	Labeo rohita
A0A498LL39	RXN06145.1	Interferon-induced 44-like protein	C	representative	1	0	96	0	13								A0A498LL39	1051	7				tr|A0A498LL39|A0A498LL39_LABRO Interferon-induced 44-like protein OS=Labeo rohita OX=84645 GN=ROHU_012423 PE=4 SV=1	Labeo rohita
A0A498MEM4	RXN17496.1	Interferon-induced 44-like protein	C	representative	1	0	72	0	10								A0A498LL39	1051	7				tr|A0A498MEM4|A0A498MEM4_LABRO Interferon-induced 44-like protein OS=Labeo rohita OX=84645 GN=ROHU_026776 PE=4 SV=1	Labeo rohita
A0A498LL42	RXN09128.1	Nephronectin-like isoform X1	C	canonical	0.999	0	16	0	6								A0A498LL42	1052	1				tr|A0A498LL42|A0A498LL42_LABRO Nephronectin-like isoform X1 OS=Labeo rohita OX=84645 GN=ROHU_011270 PE=4 SV=1	Labeo rohita
A0A498LL46	RXN09119.1	Collagen alpha-1(XVII) chain-like protein	C	weak	0.988	0	2	0	1								A0A498LL46	1053	1				tr|A0A498LL46|A0A498LL46_LABRO Collagen alpha-1(XVII) chain-like protein OS=Labeo rohita OX=84645 GN=ROHU_011261 PE=4 SV=1	Labeo rohita
A0A498LL51	RXN09138.1	Putative E3 ubiquitin-ligase HERC4	C	representative	0.996	0	8	0	2								A0A498LL51	1054	5				tr|A0A498LL51|A0A498LL51_LABRO Putative E3 ubiquitin-ligase HERC4 OS=Labeo rohita OX=84645 GN=ROHU_011280 PE=4 SV=1	Labeo rohita
A0A498LMB2		Arylsulfatase B	C	indistinguishable representative	0.999	0	86	0	14								A0A498LL51	1054	5				tr|A0A498LMB2|A0A498LMB2_LABRO Arylsulfatase B OS=Labeo rohita OX=84645 GN=ROHU_032094 PE=4 SV=1	Labeo rohita
A0A498LL52	RXN08731.1	Ras-related Rab-2A	C	representative	1	0	1326	0	29								A0A498LL52	1055	3				tr|A0A498LL52|A0A498LL52_LABRO Ras-related Rab-2A OS=Labeo rohita OX=84645 GN=ROHU_031673 PE=4 SV=1	Labeo rohita
A0A498LL55	RXN07434.1	Probable ribosome biogenesis protein ROHU_032354	C	indistinguishable representative	0.999	0	3	0	2								A0A498LL55	1056	2				tr|A0A498LL55|A0A498LL55_LABRO Probable ribosome biogenesis protein ROHU_032354 OS=Labeo rohita OX=84645 GN=ROHU_032354 PE=3 SV=1	Labeo rohita
A0A498LL57	RXN08960.1	Docosahexaenoic acid omega-hydroxylase CYP4F3-like protein	C	canonical	0.999	0	4	0	3								A0A498LL57	1057	1				tr|A0A498LL57|A0A498LL57_LABRO Docosahexaenoic acid omega-hydroxylase CYP4F3-like protein OS=Labeo rohita OX=84645 GN=ROHU_011499 PE=3 SV=1	Labeo rohita
A0A498LL58		DALR anticodon-binding domain-containing 3	C	weak	0.915	0	1	0	1								A0A498LL58	1058	2				tr|A0A498LL58|A0A498LL58_LABRO DALR anticodon-binding domain-containing 3 OS=Labeo rohita OX=84645 GN=ROHU_035338 PE=4 SV=1	Labeo rohita
A0A498LL59	RXN06165.1	A-kinase anchor 7 isoform gamma-like isoform X2	C	weak	0.996	0	1	0	1								A0A498LL59	1059	1				tr|A0A498LL59|A0A498LL59_LABRO A-kinase anchor 7 isoform gamma-like isoform X2 OS=Labeo rohita OX=84645 GN=ROHU_012443 PE=4 SV=1	Labeo rohita
A0A498LL63	RXN09148.1	Neural cell adhesion molecule L1 isoform X1	C	canonical	0.999	0	101	0	19								A0A498LL63	1060	1				tr|A0A498LL63|A0A498LL63_LABRO Neural cell adhesion molecule L1 isoform X1 OS=Labeo rohita OX=84645 GN=ROHU_011290 PE=4 SV=1	Labeo rohita
A0A498LL64	RXN09139.1	Zona pellucida sperm-binding 3-like protein	C	canonical	1	0	253	0	27								A0A498LL64	1061	1				tr|A0A498LL64|A0A498LL64_LABRO Zona pellucida sperm-binding 3-like protein OS=Labeo rohita OX=84645 GN=ROHU_011281 PE=4 SV=1	Labeo rohita
A0A498LL73		Elongation of very long chain fatty acids protein (EC 2.3.1.199) (Very-long-chain 3-oxoacyl-CoA synthase)	C	weak	0.89	0	1	0	1								A0A498LL73	1062	1				tr|A0A498LL73|A0A498LL73_LABRO Elongation of very long chain fatty acids protein OS=Labeo rohita OX=84645 GN=ROHU_031578 PE=3 SV=1	Labeo rohita
A0A498LL82		Metabotropic glutamate receptor 4-like protein	C	weak	0.822	0	1	0	1								A0A498LL82	1063	1				tr|A0A498LL82|A0A498LL82_LABRO Metabotropic glutamate receptor 4-like protein OS=Labeo rohita OX=84645 GN=ROHU_011310 PE=4 SV=1	Labeo rohita
A0A498LL87	RXN06377.1	Cleavage and polyadenylation specificity factor subunit 3	C	indistinguishable representative	0.999	0	51	0	22								A0A498LL87	1064	2				tr|A0A498LL87|A0A498LL87_LABRO Cleavage and polyadenylation specificity factor subunit 3 OS=Labeo rohita OX=84645 GN=ROHU_012409 PE=4 SV=1	Labeo rohita
A0A498LL89	RXN08771.1	Mitotic checkpoint BUB3 isoform X1	C	canonical	1	0	173	0	14								A0A498LL89	1065	1				tr|A0A498LL89|A0A498LL89_LABRO Mitotic checkpoint BUB3 isoform X1 OS=Labeo rohita OX=84645 GN=ROHU_031598 PE=4 SV=1	Labeo rohita
A0A498LL90		Hematopoietic progenitor cell antigen CD34	C	canonical	0.998	0	10	0	2								A0A498LL90	1066	1				tr|A0A498LL90|A0A498LL90_LABRO Hematopoietic progenitor cell antigen CD34 OS=Labeo rohita OX=84645 GN=ROHU_011311 PE=4 SV=1	Labeo rohita
A0A498LL98	RXN08021.1	Signal transducer and activator of transcription	C	canonical	0.988	0	2	0	2								A0A498LL98	1067	1				tr|A0A498LL98|A0A498LL98_LABRO Signal transducer and activator of transcription OS=Labeo rohita OX=84645 GN=ROHU_011707 PE=3 SV=1	Labeo rohita
A0A498LLA7	RXN09189.1	tRNA pseudouridine synthase Pus10	C	canonical	0.999	0	20	0	10								A0A498LLA7	1068	1				tr|A0A498LLA7|A0A498LLA7_LABRO tRNA pseudouridine synthase Pus10 OS=Labeo rohita OX=84645 GN=ROHU_035286 PE=4 SV=1	Labeo rohita
A0A498LLD3	RXN12952.1	Alanine--glyoxylate aminotransferase mitochondrial	C	canonical	1	0	863	0	55								A0A498LLD3	1069	1				tr|A0A498LLD3|A0A498LLD3_LABRO Alanine--glyoxylate aminotransferase mitochondrial OS=Labeo rohita OX=84645 GN=ROHU_035331 PE=3 SV=1	Labeo rohita
A0A498LLD6		BTB POZ domain-containing KCTD7	C	canonical	0.984	0	2	0	2								A0A498LLD6	1070	1				tr|A0A498LLD6|A0A498LLD6_LABRO BTB POZ domain-containing KCTD7 OS=Labeo rohita OX=84645 GN=ROHU_011360 PE=4 SV=1	Labeo rohita
A0A498LLD8		Mitochondrial uncoupling 4 isoform X1	C	weak	0.939	0	1	0	1								A0A498LLD8	1071	1				tr|A0A498LLD8|A0A498LLD8_LABRO Mitochondrial uncoupling 4 isoform X1 OS=Labeo rohita OX=84645 GN=ROHU_032959 PE=3 SV=1	Labeo rohita
A0A498LLE2	RXN07524.1	Protocadherin-1-like isoform X1	C	indistinguishable representative	0.996	0	6	0	2								A0A498LLE2	1072	2				tr|A0A498LLE2|A0A498LLE2_LABRO Protocadherin-1-like isoform X1 OS=Labeo rohita OX=84645 GN=ROHU_011940 PE=4 SV=1	Labeo rohita
A0A498LLF1	RXN08373.1	Amino acid transporter	C	canonical	0.975	0	11	0	3								A0A498LLF1	1073	1				tr|A0A498LLF1|A0A498LLF1_LABRO Amino acid transporter OS=Labeo rohita OX=84645 GN=ROHU_035365 PE=3 SV=1	Labeo rohita
A0A498LLF2	RXN08841.1	GTP cyclohydrolase 1	C	canonical	0.999	0	8	0	5								A0A498LLF2	1074	2				tr|A0A498LLF2|A0A498LLF2_LABRO GTP cyclohydrolase 1 OS=Labeo rohita OX=84645 GN=ROHU_011380 PE=3 SV=1	Labeo rohita
A0A498LLG3	RXN08851.1	Collagen alpha-1(X) chain-like protein	C	canonical	1	0	71	0	9								A0A498LLG3	1075	2				tr|A0A498LLG3|A0A498LLG3_LABRO Collagen alpha-1(X) chain-like protein OS=Labeo rohita OX=84645 GN=ROHU_011390 PE=4 SV=1	Labeo rohita
A0A498M906	RXN14075.1	Collagen alpha-1(X) chain-like protein	C	canonical	0.999	0	21	0	4								A0A498LLG3	1075	2				tr|A0A498M906|A0A498M906_LABRO Collagen alpha-1(X) chain-like protein OS=Labeo rohita OX=84645 GN=ROHU_009241 PE=4 SV=1	Labeo rohita
A0A498LLG6	RXN09080.1	Aprataxin isoform X1	C	canonical	0.998	0	4	0	3								A0A498LLG6	1076	1				tr|A0A498LLG6|A0A498LLG6_LABRO Aprataxin isoform X1 OS=Labeo rohita OX=84645 GN=ROHU_011222 PE=4 SV=1	Labeo rohita
A0A498L3K0	RXN02992.1	Gamma-crystallin M2-like protein	C	representative	1	0	1438	0	83								A0A498LLG8	1077	145				tr|A0A498L3K0|A0A498L3K0_LABRO Gamma-crystallin M2-like protein OS=Labeo rohita OX=84645 GN=ROHU_034578 PE=3 SV=1	Labeo rohita
A0A498L3K3		Gamma-crystallin M2-like protein	C	representative	1	0	906	0	38								A0A498LLG8	1077	145				tr|A0A498L3K3|A0A498L3K3_LABRO Gamma-crystallin M2-like protein OS=Labeo rohita OX=84645 GN=ROHU_034577 PE=3 SV=1	Labeo rohita
A0A498L3L0	RXN03002.1	Beta-crystallin S-1-like protein	C	canonical	0.999	0	284	0	18								A0A498LLG8	1077	145				tr|A0A498L3L0|A0A498L3L0_LABRO Beta-crystallin S-1-like protein OS=Labeo rohita OX=84645 GN=ROHU_034588 PE=3 SV=1	Labeo rohita
A0A498L3L2	RXN03001.1	Gamma-crystallin M3	C	canonical	1	0	1961	0	91								A0A498LLG8	1077	145				tr|A0A498L3L2|A0A498L3L2_LABRO Gamma-crystallin M3 OS=Labeo rohita OX=84645 GN=ROHU_034587 PE=3 SV=1	Labeo rohita
A0A498L3N8	RXN03000.1	Gamma-crystallin M3-like protein	C	canonical	1	0	226	0	10								A0A498LLG8	1077	145				tr|A0A498L3N8|A0A498L3N8_LABRO Gamma-crystallin M3-like protein OS=Labeo rohita OX=84645 GN=ROHU_034586 PE=3 SV=1	Labeo rohita
A0A498L3W2	RXN03092.1	Gamma-crystallin M2-like protein	C	representative	1	0	1108	0	62								A0A498LLG8	1077	145				tr|A0A498L3W2|A0A498L3W2_LABRO Gamma-crystallin M2-like protein OS=Labeo rohita OX=84645 GN=ROHU_034678 PE=3 SV=1	Labeo rohita
A0A498L447	RXN02999.1	Gamma-crystallin M2-like protein	C	canonical	1	0	1229	0	68								A0A498LLG8	1077	145				tr|A0A498L447|A0A498L447_LABRO Gamma-crystallin M2-like protein OS=Labeo rohita OX=84645 GN=ROHU_034585 PE=3 SV=1	Labeo rohita
A0A498L4G6	RXN02998.1	Gamma-crystallin M2-like protein	C	canonical	1	0	1690	0	94								A0A498LLG8	1077	145				tr|A0A498L4G6|A0A498L4G6_LABRO Gamma-crystallin M2-like protein OS=Labeo rohita OX=84645 GN=ROHU_034584 PE=3 SV=1	Labeo rohita
A0A498L5B4	RXN19197.1	Putative ATP-dependent RNA helicase DDX47	C	canonical	0.999	0	21	0	6								A0A498LLG8	1077	145				tr|A0A498L5B4|A0A498L5B4_LABRO Putative ATP-dependent RNA helicase DDX47 OS=Labeo rohita OX=84645 GN=ROHU_013386 PE=3 SV=1	Labeo rohita
A0A498L6D5	RXN02993.1	Gamma-crystallin M2-like protein	C	canonical	1	0	448	0	45								A0A498LLG8	1077	145				tr|A0A498L6D5|A0A498L6D5_LABRO Gamma-crystallin M2-like protein OS=Labeo rohita OX=84645 GN=ROHU_034579 PE=3 SV=1	Labeo rohita
A0A498L6N1	RXN03093.1	Gamma-crystallin M2-like protein	C	marginally distinguished	1	0	1109	0	70								A0A498LLG8	1077	145				tr|A0A498L6N1|A0A498L6N1_LABRO Gamma-crystallin M2-like protein OS=Labeo rohita OX=84645 GN=ROHU_034679 PE=3 SV=1	Labeo rohita
A0A498L6Y3	RXN04110.1	Retinol dehydrogenase 12-like	C	canonical	0.999	0	58	0	6								A0A498LLG8	1077	145				tr|A0A498L6Y3|A0A498L6Y3_LABRO Retinol dehydrogenase 12-like OS=Labeo rohita OX=84645 GN=ROHU_035175 PE=3 SV=1	Labeo rohita
A0A498L7A1	RXN04132.1	Retinol dehydrogenase 13-like protein	C	canonical	1	0	365	0	17								A0A498LLG8	1077	145				tr|A0A498L7A1|A0A498L7A1_LABRO Retinol dehydrogenase 13-like protein OS=Labeo rohita OX=84645 GN=ROHU_034133 PE=4 SV=1	Labeo rohita
A0A498L825		Gamma-crystallin M2-like protein	C	representative	1	0	1268	0	61								A0A498LLG8	1077	145				tr|A0A498L825|A0A498L825_LABRO Gamma-crystallin M2-like protein OS=Labeo rohita OX=84645 GN=ROHU_034572 PE=3 SV=1	Labeo rohita
A0A498L835	RXN02996.1	Gamma-crystallin M2-like protein	C	canonical	1	0	1332	0	68								A0A498LLG8	1077	145				tr|A0A498L835|A0A498L835_LABRO Gamma-crystallin M2-like protein OS=Labeo rohita OX=84645 GN=ROHU_034582 PE=3 SV=1	Labeo rohita
A0A498L9T7	RXN04133.1	Retinol dehydrogenase 13-like protein	C	canonical	1	0	247	0	18								A0A498LLG8	1077	145				tr|A0A498L9T7|A0A498L9T7_LABRO Retinol dehydrogenase 13-like protein OS=Labeo rohita OX=84645 GN=ROHU_034134 PE=4 SV=1	Labeo rohita
A0A498LAW2	RXN02997.1	Gamma-crystallin M2-like protein	C	canonical	1	0	1349	0	71								A0A498LLG8	1077	145				tr|A0A498LAW2|A0A498LAW2_LABRO Gamma-crystallin M2-like protein OS=Labeo rohita OX=84645 GN=ROHU_034583 PE=3 SV=1	Labeo rohita
A0A498LBC2	RXN05641.1	Retinoblastoma-binding 5 isoform X1	C	canonical	0.997	0	6	0	4								A0A498LLG8	1077	145				tr|A0A498LBC2|A0A498LBC2_LABRO Retinoblastoma-binding 5 isoform X1 OS=Labeo rohita OX=84645 GN=ROHU_012638 PE=4 SV=1	Labeo rohita
A0A498LC93	RXN04134.1	Retinol dehydrogenase 13-like protein	C	canonical	1	0	562	0	26								A0A498LLG8	1077	145				tr|A0A498LC93|A0A498LC93_LABRO Retinol dehydrogenase 13-like protein OS=Labeo rohita OX=84645 GN=ROHU_034135 PE=3 SV=1	Labeo rohita
A0A498LCI0	RXN02995.1	Gamma-crystallin M2-like protein	C	marginally distinguished	1	0	1523	0	70								A0A498LLG8	1077	145				tr|A0A498LCI0|A0A498LCI0_LABRO Gamma-crystallin M2-like protein OS=Labeo rohita OX=84645 GN=ROHU_034581 PE=3 SV=1	Labeo rohita
A0A498LGA1	RXN07329.1	Cysteine-rich 2-like protein	C	representative	1	0	150	0	15								A0A498LLG8	1077	145				tr|A0A498LGA1|A0A498LGA1_LABRO Cysteine-rich 2-like protein OS=Labeo rohita OX=84645 GN=ROHU_012044 PE=4 SV=1	Labeo rohita
A0A498LGM3	RXN07330.1	Cysteine-rich 1	C	canonical	1	0	271	0	15								A0A498LLG8	1077	145				tr|A0A498LGM3|A0A498LGM3_LABRO Cysteine-rich 1 OS=Labeo rohita OX=84645 GN=ROHU_012045 PE=4 SV=1	Labeo rohita
A0A498LHI3	RXN07640.1	Dehydrogenase reductase SDR family member 13-like protein	C	canonical	1	0	1226	0	82								A0A498LLG8	1077	145				tr|A0A498LHI3|A0A498LHI3_LABRO Dehydrogenase reductase SDR family member 13-like protein OS=Labeo rohita OX=84645 GN=ROHU_011870 PE=3 SV=1	Labeo rohita
A0A498LHT9	RXN07641.1	Beta-crystallin B1-like protein	C	canonical	0.999	0	505	0	35								A0A498LLG8	1077	145				tr|A0A498LHT9|A0A498LHT9_LABRO Beta-crystallin B1-like protein OS=Labeo rohita OX=84645 GN=ROHU_011871 PE=3 SV=1	Labeo rohita
A0A498LLG8	RXN09249.1	Adhesion G-coupled receptor L4-like protein	C	canonical	1	0	4576	0	212								A0A498LLG8	1077	145				tr|A0A498LLG8|A0A498LLG8_LABRO Adhesion G-coupled receptor L4-like protein OS=Labeo rohita OX=84645 GN=ROHU_031486 PE=3 SV=1	Labeo rohita
A0A498LLL0		Dehydrogenase reductase SDR family member 13-like protein	C	indistinguishable representative	1	0	29	0	2								A0A498LLG8	1077	145				tr|A0A498LLL0|A0A498LLL0_LABRO Dehydrogenase reductase SDR family member 13-like protein OS=Labeo rohita OX=84645 GN=ROHU_011824 PE=4 SV=1	Labeo rohita
A0A498LM82	RXN08942.1	Peptidyl-prolyl cis-trans isomerase (PPIase) (EC 5.2.1.8)	C	canonical	1	0	312	0	20								A0A498LLG8	1077	145				tr|A0A498LM82|A0A498LM82_LABRO Peptidyl-prolyl cis-trans isomerase OS=Labeo rohita OX=84645 GN=ROHU_011481 PE=3 SV=1	Labeo rohita
A0A498LNN6	RXN08384.1	Malic enzyme	C	indistinguishable representative	1	0	721	0	42								A0A498LLG8	1077	145				tr|A0A498LNN6|A0A498LNN6_LABRO Malic enzyme OS=Labeo rohita OX=84645 GN=ROHU_011523 PE=3 SV=1	Labeo rohita
A0A498LP94	RXN09990.1	B-cell lymphoma 3-like protein	C	representative	1	0	1314	0	90								A0A498LLG8	1077	145				tr|A0A498LP94|A0A498LP94_LABRO B-cell lymphoma 3-like protein OS=Labeo rohita OX=84645 GN=ROHU_031083 PE=4 SV=1	Labeo rohita
A0A498LQI5	RXN10688.1	Carboxypeptidase D-like protein	C	canonical	1	0	904	0	79								A0A498LLG8	1077	145				tr|A0A498LQI5|A0A498LQI5_LABRO Carboxypeptidase D-like protein OS=Labeo rohita OX=84645 GN=ROHU_030528 PE=3 SV=1	Labeo rohita
A0A498LR73	RXN09234.1	Signal transducer and activator of transcription	C	indistinguishable representative	1	0	286	0	32								A0A498LLG8	1077	145				tr|A0A498LR73|A0A498LR73_LABRO Signal transducer and activator of transcription OS=Labeo rohita OX=84645 GN=ROHU_031471 PE=3 SV=1	Labeo rohita
A0A498LR76	RXN10222.1	Putative ATP-dependent RNA helicase ddx6	C	canonical	1	0	1552	0	118								A0A498LLG8	1077	145				tr|A0A498LR76|A0A498LR76_LABRO Putative ATP-dependent RNA helicase ddx6 OS=Labeo rohita OX=84645 GN=ROHU_030800 PE=3 SV=1	Labeo rohita
A0A498LUW8	RXN10594.1	Retinol dehydrogenase 12	C	canonical	0.999	0	102	0	9								A0A498LLG8	1077	145				tr|A0A498LUW8|A0A498LUW8_LABRO Retinol dehydrogenase 12 OS=Labeo rohita OX=84645 GN=ROHU_030664 PE=3 SV=1	Labeo rohita
A0A498LWH4	RXN12540.1	Peptidyl-prolyl cis-trans isomerase D	C	canonical	0.999	0	177	0	23								A0A498LLG8	1077	145				tr|A0A498LWH4|A0A498LWH4_LABRO Peptidyl-prolyl cis-trans isomerase D OS=Labeo rohita OX=84645 GN=ROHU_029509 PE=4 SV=1	Labeo rohita
A0A498LZ21	RXN13491.1	Zinc finger BED domain-containing 4-like protein	C	canonical	1	0	530	0	19								A0A498LLG8	1077	145				tr|A0A498LZ21|A0A498LZ21_LABRO Zinc finger BED domain-containing 4-like protein OS=Labeo rohita OX=84645 GN=ROHU_009680 PE=3 SV=1	Labeo rohita
A0A498M118	RXN13166.1	Dehydrogenase reductase SDR family member 13-like protein	C	canonical	1	0	245	0	20								A0A498LLG8	1077	145				tr|A0A498M118|A0A498M118_LABRO Dehydrogenase reductase SDR family member 13-like protein OS=Labeo rohita OX=84645 GN=ROHU_029153 PE=4 SV=1	Labeo rohita
A0A498M1C4	RXN14351.1	Beta-crystallin A1-like protein	C	canonical	1	0	1120	0	74								A0A498LLG8	1077	145				tr|A0A498M1C4|A0A498M1C4_LABRO Beta-crystallin A1-like protein OS=Labeo rohita OX=84645 GN=ROHU_028630 PE=3 SV=1	Labeo rohita
A0A498M670	RXN13165.1	Dehydrogenase reductase SDR family member 13-like protein	C	marginally distinguished	1	0	138	0	15								A0A498LLG8	1077	145				tr|A0A498M670|A0A498M670_LABRO Dehydrogenase reductase SDR family member 13-like protein OS=Labeo rohita OX=84645 GN=ROHU_029152 PE=4 SV=1	Labeo rohita
A0A498M7K7	RXN13167.1	Dehydrogenase reductase SDR family member 13-like protein	C	canonical	1	0	257	0	21								A0A498LLG8	1077	145				tr|A0A498M7K7|A0A498M7K7_LABRO Dehydrogenase reductase SDR family member 13-like protein OS=Labeo rohita OX=84645 GN=ROHU_029154 PE=3 SV=1	Labeo rohita
A0A498M9N5	RXN17758.1	Phenylalanine-4-hydroxylase isoform X2	C	canonical	1	0	1434	0	92								A0A498LLG8	1077	145				tr|A0A498M9N5|A0A498M9N5_LABRO Phenylalanine-4-hydroxylase isoform X2 OS=Labeo rohita OX=84645 GN=ROHU_026605 PE=4 SV=1	Labeo rohita
A0A498MAJ5	RXN18108.1	Gamma-crystallin M1-like protein	C	canonical	1	0	2584	0	109								A0A498LLG8	1077	145				tr|A0A498MAJ5|A0A498MAJ5_LABRO Gamma-crystallin M1-like protein OS=Labeo rohita OX=84645 GN=ROHU_007818 PE=3 SV=1	Labeo rohita
A0A498MAJ8	RXN18109.1	Gamma-crystallin M2-like protein	C	canonical	0.999	0	28	0	8								A0A498LLG8	1077	145				tr|A0A498MAJ8|A0A498MAJ8_LABRO Gamma-crystallin M2-like protein OS=Labeo rohita OX=84645 GN=ROHU_007819 PE=3 SV=1	Labeo rohita
A0A498MB38		Gamma-crystallin M2-like protein	C	representative	1	0	1634	0	72								A0A498LLG8	1077	145				tr|A0A498MB38|A0A498MB38_LABRO Gamma-crystallin M2-like protein OS=Labeo rohita OX=84645 GN=ROHU_007811 PE=3 SV=1	Labeo rohita
A0A498MB48	RXN18111.1	Gamma-crystallin M2-like protein	C	canonical	1	0	1521	0	71								A0A498LLG8	1077	145				tr|A0A498MB48|A0A498MB48_LABRO Gamma-crystallin M2-like protein OS=Labeo rohita OX=84645 GN=ROHU_007821 PE=3 SV=1	Labeo rohita
A0A498MCZ0	RXN18100.1	Gamma-crystallin M2-like protein	C	marginally distinguished	1	0	764	0	61								A0A498LLG8	1077	145				tr|A0A498MCZ0|A0A498MCZ0_LABRO Gamma-crystallin M2-like protein OS=Labeo rohita OX=84645 GN=ROHU_007810 PE=3 SV=1	Labeo rohita
A0A498MD02	RXN18110.1	Gamma-crystallin M2-like protein	C	canonical	1	0	1764	0	96								A0A498LLG8	1077	145				tr|A0A498MD02|A0A498MD02_LABRO Gamma-crystallin M2-like protein OS=Labeo rohita OX=84645 GN=ROHU_007820 PE=3 SV=1	Labeo rohita
A0A498ME95	RXN18103.1	Gamma-crystallin M2-like protein	C	canonical	1	0	1237	0	69								A0A498LLG8	1077	145				tr|A0A498ME95|A0A498ME95_LABRO Gamma-crystallin M2-like protein OS=Labeo rohita OX=84645 GN=ROHU_007813 PE=3 SV=1	Labeo rohita
A0A498MFG0	RXN18102.1	Gamma-crystallin M2-like protein	C	canonical	1	0	1420	0	78								A0A498LLG8	1077	145				tr|A0A498MFG0|A0A498MFG0_LABRO Gamma-crystallin M2-like protein OS=Labeo rohita OX=84645 GN=ROHU_007812 PE=3 SV=1	Labeo rohita
A0A498MFG2	RXN18104.1	Gamma-crystallin M2-like protein	C	canonical	1	0	1115	0	85								A0A498LLG8	1077	145				tr|A0A498MFG2|A0A498MFG2_LABRO Gamma-crystallin M2-like protein OS=Labeo rohita OX=84645 GN=ROHU_007814 PE=3 SV=1	Labeo rohita
A0A498MFP2	RXN20039.1	Beta-crystallin B1-like protein	C	canonical	1	0	2848	0	132								A0A498LLG8	1077	145				tr|A0A498MFP2|A0A498MFP2_LABRO Beta-crystallin B1-like protein OS=Labeo rohita OX=84645 GN=ROHU_025341 PE=3 SV=1	Labeo rohita
A0A498MGP2	RXN18106.1	Gamma-crystallin M2-like protein	C	canonical	0.999	0	502	0	36								A0A498LLG8	1077	145				tr|A0A498MGP2|A0A498MGP2_LABRO Gamma-crystallin M2-like protein OS=Labeo rohita OX=84645 GN=ROHU_007816 PE=3 SV=1	Labeo rohita
A0A498MHQ4	RXN20828.1	Peptidyl-prolyl cis-trans isomerase (PPIase) (EC 5.2.1.8)	C	canonical	1	0	2926	0	47								A0A498LLG8	1077	145				tr|A0A498MHQ4|A0A498MHQ4_LABRO Peptidyl-prolyl cis-trans isomerase OS=Labeo rohita OX=84645 GN=ROHU_024689 PE=3 SV=1	Labeo rohita
A0A498MIM7	RXN21169.1	Deoxynucleoside triphosphate triphosphohydrolase SAMHD1	C	canonical	1	0	42	0	17								A0A498LLG8	1077	145				tr|A0A498MIM7|A0A498MIM7_LABRO Deoxynucleoside triphosphate triphosphohydrolase SAMHD1 OS=Labeo rohita OX=84645 GN=ROHU_024426 PE=4 SV=1	Labeo rohita
A0A498MIR4	RXN20040.1	Beta-crystallin A1-like protein	C	canonical	1	0	812	0	66								A0A498LLG8	1077	145				tr|A0A498MIR4|A0A498MIR4_LABRO Beta-crystallin A1-like protein OS=Labeo rohita OX=84645 GN=ROHU_025342 PE=3 SV=1	Labeo rohita
A0A498MLK4	RXN18105.1	Gamma-crystallin M2-like protein	C	canonical	1	0	1856	0	88								A0A498LLG8	1077	145				tr|A0A498MLK4|A0A498MLK4_LABRO Gamma-crystallin M2-like protein OS=Labeo rohita OX=84645 GN=ROHU_007815 PE=3 SV=1	Labeo rohita
A0A498MM67		Gamma-crystallin M2-like protein	C	marginally distinguished	1	0	805	0	61								A0A498LLG8	1077	145				tr|A0A498MM67|A0A498MM67_LABRO Gamma-crystallin M2-like protein OS=Labeo rohita OX=84645 GN=ROHU_007807 PE=3 SV=1	Labeo rohita
A0A498MM76	RXN18107.1	Gamma-crystallin M1-like protein	C	canonical	1	0	2322	0	102								A0A498LLG8	1077	145				tr|A0A498MM76|A0A498MM76_LABRO Gamma-crystallin M1-like protein OS=Labeo rohita OX=84645 GN=ROHU_007817 PE=3 SV=1	Labeo rohita
A0A498MN61	RXN21720.1	E3 SUMO-ligase 2-like isoform X2	C	canonical	1	0	505	0	103								A0A498LLG8	1077	145				tr|A0A498MN61|A0A498MN61_LABRO E3 SUMO-ligase 2-like isoform X2 OS=Labeo rohita OX=84645 GN=ROHU_036781 PE=4 SV=1	Labeo rohita
A0A498MQK5	RXN21624.1	Inactive serine threonine-kinase VRK3-like protein	C	canonical	0.999	0	123	0	11								A0A498LLG8	1077	145				tr|A0A498MQK5|A0A498MQK5_LABRO Inactive serine threonine-kinase VRK3-like protein OS=Labeo rohita OX=84645 GN=ROHU_024203 PE=4 SV=1	Labeo rohita
A0A498MYX9	RXN21707.1	E3 SUMO-ligase 2-like isoform X2	C	canonical	1	0	242	0	35								A0A498LLG8	1077	145				tr|A0A498MYX9|A0A498MYX9_LABRO E3 SUMO-ligase 2-like isoform X2 OS=Labeo rohita OX=84645 GN=ROHU_023956 PE=4 SV=1	Labeo rohita
A0A498N104	RXN27969.1	Deoxynucleoside triphosphate triphosphohydrolase SAMHD1-like protein	C	representative	0.999	0	20	0	6								A0A498LLG8	1077	145				tr|A0A498N104|A0A498N104_LABRO Deoxynucleoside triphosphate triphosphohydrolase SAMHD1-like protein OS=Labeo rohita OX=84645 GN=ROHU_005377 PE=4 SV=1	Labeo rohita
A0A498N127	RXN26760.1	Retinol dehydrogenase 14-like protein	C	canonical	1	0	90	0	18								A0A498LLG8	1077	145				tr|A0A498N127|A0A498N127_LABRO Retinol dehydrogenase 14-like protein OS=Labeo rohita OX=84645 GN=ROHU_005628 PE=3 SV=1	Labeo rohita
A0A498N171	RXN27948.1	Retinol dehydrogenase 12-like protein	C	canonical	1	0	198	0	14								A0A498LLG8	1077	145				tr|A0A498N171|A0A498N171_LABRO Retinol dehydrogenase 12-like protein OS=Labeo rohita OX=84645 GN=ROHU_019689 PE=4 SV=1	Labeo rohita
A0A498N190		Deoxynucleoside triphosphate triphosphohydrolase SAMHD1-like protein	C	marginally distinguished	1	0	52	0	12								A0A498LLG8	1077	145				tr|A0A498N190|A0A498N190_LABRO Deoxynucleoside triphosphate triphosphohydrolase SAMHD1-like protein OS=Labeo rohita OX=84645 GN=ROHU_005376 PE=3 SV=1	Labeo rohita
A0A498N235	RXN26851.1	Beta-crystallin B1-like protein	C	canonical	1	0	1985	0	110								A0A498LLG8	1077	145				tr|A0A498N235|A0A498N235_LABRO Beta-crystallin B1-like protein OS=Labeo rohita OX=84645 GN=ROHU_005583 PE=3 SV=1	Labeo rohita
A0A498N499	RXN29209.1	Dehydrogenase reductase SDR family member 13-like protein	C	canonical	1	0	333	0	17								A0A498LLG8	1077	145				tr|A0A498N499|A0A498N499_LABRO Dehydrogenase reductase SDR family member 13-like protein OS=Labeo rohita OX=84645 GN=ROHU_018938 PE=3 SV=1	Labeo rohita
A0A498N4W3	RXN26852.1	Beta-crystallin A1-like protein	C	canonical	1	0	1679	0	101								A0A498LLG8	1077	145				tr|A0A498N4W3|A0A498N4W3_LABRO Beta-crystallin A1-like protein OS=Labeo rohita OX=84645 GN=ROHU_005584 PE=3 SV=1	Labeo rohita
A0A498N5J0	RXN28071.1	FEV protein	C	marginally distinguished	1	0	726	0	60								A0A498LLG8	1077	145				tr|A0A498N5J0|A0A498N5J0_LABRO FEV protein OS=Labeo rohita OX=84645 GN=ROHU_019576 PE=3 SV=1	Labeo rohita
A0A498N663	RXN24127.1	AAR2-like protein	C	canonical	0.999	0	9	0	4								A0A498LLG8	1077	145				tr|A0A498N663|A0A498N663_LABRO AAR2-like protein OS=Labeo rohita OX=84645 GN=ROHU_022337 PE=4 SV=1	Labeo rohita
A0A498N6L6	RXN29778.1	Peptidyl-prolyl cis-trans isomerase E (PPIase E) (EC 5.2.1.8)	C	canonical	1	0	39	0	12								A0A498LLG8	1077	145				tr|A0A498N6L6|A0A498N6L6_LABRO Peptidyl-prolyl cis-trans isomerase E OS=Labeo rohita OX=84645 GN=ROHU_018128 PE=3 SV=1	Labeo rohita
A0A498N6P1	RXN26246.1	Retinol dehydrogenase 12-like protein	C	marginally distinguished	0.999	0	86	0	3								A0A498LLG8	1077	145				tr|A0A498N6P1|A0A498N6P1_LABRO Retinol dehydrogenase 12-like protein OS=Labeo rohita OX=84645 GN=ROHU_020725 PE=3 SV=1	Labeo rohita
A0A498N773	RXN28671.1	Putative ATP-dependent RNA helicase DDX6	C	representative	1	0	1776	0	132								A0A498LLG8	1077	145				tr|A0A498N773|A0A498N773_LABRO Putative ATP-dependent RNA helicase DDX6 OS=Labeo rohita OX=84645 GN=ROHU_036331 PE=3 SV=1	Labeo rohita
A0A498N8F1	RXN27974.1	Deoxynucleoside triphosphate triphosphohydrolase SAMHD1-like protein	C	representative	0.998	0	5	0	2								A0A498LLG8	1077	145				tr|A0A498N8F1|A0A498N8F1_LABRO Deoxynucleoside triphosphate triphosphohydrolase SAMHD1-like protein OS=Labeo rohita OX=84645 GN=ROHU_005382 PE=3 SV=1	Labeo rohita
A0A498N9I9	RXN25357.1	Zinc finger MIZ domain-containing 2 isoform X1	C	canonical	1	0	3050	0	54								A0A498LLG8	1077	145				tr|A0A498N9I9|A0A498N9I9_LABRO Zinc finger MIZ domain-containing 2 isoform X1 OS=Labeo rohita OX=84645 GN=ROHU_036535 PE=4 SV=1	Labeo rohita
A0A498NAB0	RXN27686.1	Tyrosine-protein kinase (EC 2.7.10.2)	C	canonical	0.999	0	62	0	18								A0A498LLG8	1077	145				tr|A0A498NAB0|A0A498NAB0_LABRO Tyrosine-protein kinase OS=Labeo rohita OX=84645 GN=ROHU_019695 PE=3 SV=1	Labeo rohita
A0A498NAP3	RXN28912.1	Malic enzyme	C	canonical	1	0	875	0	41								A0A498LLG8	1077	145				tr|A0A498NAP3|A0A498NAP3_LABRO Malic enzyme OS=Labeo rohita OX=84645 GN=ROHU_018641 PE=3 SV=1	Labeo rohita
A0A498NB66	RXN29034.1	TBCC domain-containing 1	C	canonical	0.999	0	668	0	59								A0A498LLG8	1077	145				tr|A0A498NB66|A0A498NB66_LABRO TBCC domain-containing 1 OS=Labeo rohita OX=84645 GN=ROHU_018763 PE=3 SV=1	Labeo rohita
A0A498NBK9	RXN29214.1	Dehydrogenase reductase SDR family member 13-like protein	C	canonical	1	0	349	0	25								A0A498LLG8	1077	145				tr|A0A498NBK9|A0A498NBK9_LABRO Dehydrogenase reductase SDR family member 13-like protein OS=Labeo rohita OX=84645 GN=ROHU_018943 PE=3 SV=1	Labeo rohita
A0A498NDH4	RXN30502.1	Beta-crystallin S isoform X2	C	canonical	0.999	0	520	0	41								A0A498LLG8	1077	145				tr|A0A498NDH4|A0A498NDH4_LABRO Beta-crystallin S isoform X2 OS=Labeo rohita OX=84645 GN=ROHU_011160 PE=3 SV=1	Labeo rohita
A0A498NET8	RXN29215.1	Dehydrogenase reductase SDR family member 13-like protein	C	canonical	1	0	368	0	23								A0A498LLG8	1077	145				tr|A0A498NET8|A0A498NET8_LABRO Dehydrogenase reductase SDR family member 13-like protein OS=Labeo rohita OX=84645 GN=ROHU_018944 PE=3 SV=1	Labeo rohita
A0A498NHR6	RXN31402.1	Signal transducer and activator of transcription 4-like protein	C	canonical	0.999	0	46	0	12								A0A498LLG8	1077	145				tr|A0A498NHR6|A0A498NHR6_LABRO Signal transducer and activator of transcription 4-like protein OS=Labeo rohita OX=84645 GN=ROHU_017066 PE=4 SV=1	Labeo rohita
A0A498NJ16	RXN31657.1	Malic enzyme	C	canonical	1	0	1341	0	85								A0A498LLG8	1077	145				tr|A0A498NJ16|A0A498NJ16_LABRO Malic enzyme OS=Labeo rohita OX=84645 GN=ROHU_016774 PE=3 SV=1	Labeo rohita
A0A498NL97	RXN32546.1	Gamma-crystallin M3-like protein	C	canonical	1	0	951	0	50								A0A498LLG8	1077	145				tr|A0A498NL97|A0A498NL97_LABRO Gamma-crystallin M3-like protein OS=Labeo rohita OX=84645 GN=ROHU_016185 PE=3 SV=1	Labeo rohita
A0A498NN55	RXN33460.1	Beta-crystallin A2-like protein	C	canonical	1	0	3026	0	131								A0A498LLG8	1077	145				tr|A0A498NN55|A0A498NN55_LABRO Beta-crystallin A2-like protein OS=Labeo rohita OX=84645 GN=ROHU_015520 PE=3 SV=1	Labeo rohita
A0A498NNN3	RXN33513.1	Cytochrome P450 20A1	C	canonical	1	0	226	0	24								A0A498LLG8	1077	145				tr|A0A498NNN3|A0A498NNN3_LABRO Cytochrome P450 20A1 OS=Labeo rohita OX=84645 GN=ROHU_015573 PE=4 SV=1	Labeo rohita
A0A498NNX1	RXN33478.1	Islet cell autoantigen 1 isoform X3	C	marginally distinguished	0.999	0	4	0	3								A0A498LLG8	1077	145				tr|A0A498NNX1|A0A498NNX1_LABRO Islet cell autoantigen 1 isoform X3 OS=Labeo rohita OX=84645 GN=ROHU_015538 PE=4 SV=1	Labeo rohita
A0A498NQ30	RXN34170.1	Thrombospondin type-1 domain-containing 7A-like protein	C	marginally distinguished	0.999	0	8	0	4								A0A498LLG8	1077	145				tr|A0A498NQ30|A0A498NQ30_LABRO Thrombospondin type-1 domain-containing 7A-like protein OS=Labeo rohita OX=84645 GN=ROHU_004081 PE=4 SV=1	Labeo rohita
A0A498NST7	RXN35003.1	Deoxynucleoside triphosphate triphosphohydrolase SAMHD1-like protein	C	canonical	0.999	0	30	0	13								A0A498LLG8	1077	145				tr|A0A498NST7|A0A498NST7_LABRO Deoxynucleoside triphosphate triphosphohydrolase SAMHD1-like protein OS=Labeo rohita OX=84645 GN=ROHU_003916 PE=4 SV=1	Labeo rohita
A0A498NTM7	RXN35313.1	ATP-dependent zinc metalloprotease YME1L1-like protein	C	marginally distinguished	0.999	0	5	0	3								A0A498LLG8	1077	145				tr|A0A498NTM7|A0A498NTM7_LABRO ATP-dependent zinc metalloprotease YME1L1-like protein OS=Labeo rohita OX=84645 GN=ROHU_002126 PE=4 SV=1	Labeo rohita
A0A498P013	RXN37513.1	Deoxynucleoside triphosphate triphosphohydrolase SAMHD1-like protein	C	canonical	1	0	79	0	20								A0A498LLG8	1077	145				tr|A0A498P013|A0A498P013_LABRO Deoxynucleoside triphosphate triphosphohydrolase SAMHD1-like protein OS=Labeo rohita OX=84645 GN=ROHU_001989 PE=3 SV=1	Labeo rohita
A0A498P1P5	RXN38530.1	Beta-crystallin B2	C	canonical	1	0	1887	0	110								A0A498LLG8	1077	145				tr|A0A498P1P5|A0A498P1P5_LABRO Beta-crystallin B2 OS=Labeo rohita OX=84645 GN=ROHU_001027 PE=3 SV=1	Labeo rohita
A0A498P3R1		Gamma-crystallin M2-like protein	C	representative	1	0	975	0	71								A0A498LLG8	1077	145				tr|A0A498P3R1|A0A498P3R1_LABRO Gamma-crystallin M2-like protein OS=Labeo rohita OX=84645 GN=ROHU_000892 PE=3 SV=1	Labeo rohita
A0A498P4Y7	RXN17590.1	Retinol dehydrogenase 14-like protein	C	marginally distinguished	0.998	0	10	0	3								A0A498LLG8	1077	145				tr|A0A498P4Y7|A0A498P4Y7_LABRO Retinol dehydrogenase 14-like protein OS=Labeo rohita OX=84645 GN=ROHU_000294 PE=4 SV=1	Labeo rohita
A0A498LLI3		DENN domain-containing 1A-like protein	C	weak	0.989	0	1	0	1								A0A498LLI3	1078	2				tr|A0A498LLI3|A0A498LLI3_LABRO DENN domain-containing 1A-like protein OS=Labeo rohita OX=84645 GN=ROHU_031719 PE=4 SV=1	Labeo rohita
A0A498LLI5	RXN09278.1	Lysine-specific demethylase 3B-like isoform X1	C	representative	0.992	0	4	0	3								A0A498LLI5	1079	2				tr|A0A498LLI5|A0A498LLI5_LABRO Lysine-specific demethylase 3B-like isoform X1 OS=Labeo rohita OX=84645 GN=ROHU_011099 PE=4 SV=1	Labeo rohita
A0A498LLI7		HAUS augmin-like complex subunit 8 isoform X1	C	indistinguishable representative	0.998	0	5	0	2								A0A498LLI7	1080	2				tr|A0A498LLI7|A0A498LLI7_LABRO HAUS augmin-like complex subunit 8 isoform X1 OS=Labeo rohita OX=84645 GN=ROHU_031506 PE=4 SV=1	Labeo rohita
A0A498LLJ0	RXN07574.1	Ubiquitin conjugation factor E4 A-like protein	C	weak	0.944	0	1	0	1								A0A498LLJ0	1081	2				tr|A0A498LLJ0|A0A498LLJ0_LABRO Ubiquitin conjugation factor E4 A-like protein OS=Labeo rohita OX=84645 GN=ROHU_011804 PE=4 SV=1	Labeo rohita
A0A172E1R7	RXN09295.1	Lysozyme g (EC 3.2.1.17)	C	marginally distinguished	1	0	103	0	7								A0A498LLK3	1082	8				tr|A0A172E1R7|A0A172E1R7_LABRO Lysozyme g OS=Labeo rohita OX=84645 GN=LysoG PE=2 SV=1	Labeo rohita
A0A498LLK3	RXN09298.1	Lysozyme g (EC 3.2.1.17)	C	canonical	1	0	130	0	17								A0A498LLK3	1082	8				tr|A0A498LLK3|A0A498LLK3_LABRO Lysozyme g OS=Labeo rohita OX=84645 GN=ROHU_011119 PE=3 SV=1	Labeo rohita
A0A498LML7	RXN09291.1	Lysozyme g (EC 3.2.1.17)	C	canonical	1	0	74	0	9								A0A498LLK3	1082	8				tr|A0A498LML7|A0A498LML7_LABRO Lysozyme g OS=Labeo rohita OX=84645 GN=ROHU_011112 PE=3 SV=1	Labeo rohita
A0A498LN92	RXN09292.1	Lysozyme g (EC 3.2.1.17)	C	marginally distinguished	1	0	103	0	7								A0A498LLK3	1082	8				tr|A0A498LN92|A0A498LN92_LABRO Lysozyme g OS=Labeo rohita OX=84645 GN=ROHU_011113 PE=3 SV=1	Labeo rohita
A0A498LNU9	RXN09293.1	Lysozyme g (EC 3.2.1.17)	C	canonical	1	0	129	0	13								A0A498LLK3	1082	8				tr|A0A498LNU9|A0A498LNU9_LABRO Lysozyme g OS=Labeo rohita OX=84645 GN=ROHU_011114 PE=3 SV=1	Labeo rohita
A0A498LQA9	RXN09296.1	Lysozyme g (EC 3.2.1.17)	C	representative	1	0	78	0	8								A0A498LLK3	1082	8				tr|A0A498LQA9|A0A498LQA9_LABRO Lysozyme g OS=Labeo rohita OX=84645 GN=ROHU_011117 PE=3 SV=1	Labeo rohita
A0A498LRC5	RXN09294.1	Lysozyme g (EC 3.2.1.17)	C	canonical	1	0	29	0	9								A0A498LLK3	1082	8				tr|A0A498LRC5|A0A498LRC5_LABRO Lysozyme g OS=Labeo rohita OX=84645 GN=ROHU_011115 PE=3 SV=1	Labeo rohita
A0A498LV90		Lysozyme g (EC 3.2.1.17)	C	marginally distinguished	1	0	71	0	9								A0A498LLK3	1082	8				tr|A0A498LV90|A0A498LV90_LABRO Lysozyme g OS=Labeo rohita OX=84645 GN=ROHU_011118 PE=3 SV=1	Labeo rohita
A0A498LJK5		Complement factor I	C	marginally distinguished	0.999	0	212	0	13								A0A498LLL2	1083	12				tr|A0A498LJK5|A0A498LJK5_LABRO Complement factor I OS=Labeo rohita OX=84645 GN=ROHU_031842 PE=3 SV=1	Labeo rohita
A0A498LKQ3	RXN08422.1	Complement factor I	C	marginally distinguished	1	0	156	0	9								A0A498LLL2	1083	12				tr|A0A498LKQ3|A0A498LKQ3_LABRO Complement factor I OS=Labeo rohita OX=84645 GN=ROHU_031844 PE=4 SV=1	Labeo rohita
A0A498LKR5	RXN08432.1	Complement factor I-like protein	C	canonical	1	0	291	0	19								A0A498LLL2	1083	12				tr|A0A498LKR5|A0A498LKR5_LABRO Complement factor I-like protein OS=Labeo rohita OX=84645 GN=ROHU_031854 PE=3 SV=1	Labeo rohita
A0A498LLL2	RXN08433.1	Complement factor I	C	canonical	1	0	1094	0	61								A0A498LLL2	1083	12				tr|A0A498LLL2|A0A498LLL2_LABRO Complement factor I OS=Labeo rohita OX=84645 GN=ROHU_031855 PE=3 SV=1	Labeo rohita
A0A498MS87	RXN22733.1	Transmembrane protease serine 13-like protein	C	representative	0.999	0	29	0	5								A0A498LLL2	1083	12				tr|A0A498MS87|A0A498MS87_LABRO Transmembrane protease serine 13-like protein OS=Labeo rohita OX=84645 GN=ROHU_006659 PE=3 SV=1	Labeo rohita
A0A498LLL5	RXN07926.1	Spectrin beta non-erythrocytic 1-like protein	C	representative	0.999	0	15	0	3								A0A498LLL5	1084	1				tr|A0A498LLL5|A0A498LLL5_LABRO Spectrin beta non-erythrocytic 1-like protein OS=Labeo rohita OX=84645 GN=ROHU_032068 PE=4 SV=1	Labeo rohita
A0A498LLL7	RXN08911.1	NADPH:adrenodoxin mitochondrial	C	canonical	1	0	322	0	36								A0A498LLL7	1085	1				tr|A0A498LLL7|A0A498LLL7_LABRO NADPH:adrenodoxin mitochondrial OS=Labeo rohita OX=84645 GN=ROHU_011450 PE=4 SV=1	Labeo rohita
A0A498LLL8	RXN09299.1	Iduronate 2-sulfatase	C	representative	0.998	0	2	0	2								A0A498LLL8	1086	2				tr|A0A498LLL8|A0A498LLL8_LABRO Iduronate 2-sulfatase OS=Labeo rohita OX=84645 GN=ROHU_011120 PE=4 SV=1	Labeo rohita
A0A498LLM0	RXN09130.1	Aminoacyl tRNA synthase complex-interacting multifunctional 1	C	canonical	1	0	860	0	36								A0A498LLM0	1087	2				tr|A0A498LLM0|A0A498LLM0_LABRO Aminoacyl tRNA synthase complex-interacting multifunctional 1 OS=Labeo rohita OX=84645 GN=ROHU_011272 PE=4 SV=1	Labeo rohita
A0A498LVS8	RXN09417.1	Calcineurin B homologous 1	C	canonical	1	0	83	0	13								A0A498LLM0	1087	2				tr|A0A498LVS8|A0A498LVS8_LABRO Calcineurin B homologous 1 OS=Labeo rohita OX=84645 GN=ROHU_011053 PE=4 SV=1	Labeo rohita
A0A498LLM4	RXN07936.1	Sulfotransferase (EC 2.8.2.-)	C	canonical	1	0	194	0	26								A0A498LLM4	1088	1				tr|A0A498LLM4|A0A498LLM4_LABRO Sulfotransferase OS=Labeo rohita OX=84645 GN=ROHU_011762 PE=3 SV=1	Labeo rohita
A0A498LLN1	RXN08453.1	2-acylglycerol O-acyltransferase 2-A-like protein	C	canonical	0.999	0	15	0	4								A0A498LLN1	1089	1				tr|A0A498LLN1|A0A498LLN1_LABRO 2-acylglycerol O-acyltransferase 2-A-like protein OS=Labeo rohita OX=84645 GN=ROHU_031875 PE=4 SV=1	Labeo rohita
A0A498LLN4		Elongator complex 3	C	indistinguishable representative	0.999	0	12	0	8								A0A498LLN4	1090	2				tr|A0A498LLN4|A0A498LLN4_LABRO Elongator complex 3 OS=Labeo rohita OX=84645 GN=ROHU_032925 PE=4 SV=1	Labeo rohita
A0A498LLN8	RXN06507.1	Popeye domain-containing 3-like protein	C	canonical	0.999	0	21	0	5								A0A498LLN8	1091	1				tr|A0A498LLN8|A0A498LLN8_LABRO Popeye domain-containing 3-like protein OS=Labeo rohita OX=84645 GN=ROHU_032802 PE=4 SV=1	Labeo rohita
A0A498LLQ5	RXN06345.1	Platelet-activating factor acetylhydrolase (EC 3.1.1.47)	C	weak	0.958	0	3	0	1								A0A498LLQ5	1092	2				tr|A0A498LLQ5|A0A498LLQ5_LABRO Platelet-activating factor acetylhydrolase OS=Labeo rohita OX=84645 GN=ROHU_032945 PE=4 SV=1	Labeo rohita
A0A498LLR5	RXN08961.1	Docosahexaenoic acid omega-hydroxylase CYP4F3-like protein	C	representative	0.999	0	6	0	3								A0A498LLR5	1093	1				tr|A0A498LLR5|A0A498LLR5_LABRO Docosahexaenoic acid omega-hydroxylase CYP4F3-like protein OS=Labeo rohita OX=84645 GN=ROHU_011500 PE=4 SV=1	Labeo rohita
A0A498LLS1	RXN08971.1	Endoribonuclease Dicer	C	canonical	0.999	0	28	0	19								A0A498LLS1	1094	3				tr|A0A498LLS1|A0A498LLS1_LABRO Endoribonuclease Dicer OS=Labeo rohita OX=84645 GN=ROHU_035304 PE=3 SV=1	Labeo rohita
A0A498N7I0		Sulfotransferase (EC 2.8.2.-)	C	indistinguishable representative	0.999	0	43	0	12								A0A498LLS1	1094	3				tr|A0A498N7I0|A0A498N7I0_LABRO Sulfotransferase OS=Labeo rohita OX=84645 GN=ROHU_018021 PE=3 SV=1	Labeo rohita
A0A498LLS5	RXN07996.1	Omega-amidase NIT2	C	canonical	1	0	410	0	21								A0A498LLS5	1095	1				tr|A0A498LLS5|A0A498LLS5_LABRO Omega-amidase NIT2 OS=Labeo rohita OX=84645 GN=ROHU_011682 PE=4 SV=1	Labeo rohita
A0A498LLT9	RXN08991.1	Ubiquitin fusion degradation 1-like protein	C	canonical	1	0	228	0	19								A0A498LLT9	1096	1				tr|A0A498LLT9|A0A498LLT9_LABRO Ubiquitin fusion degradation 1-like protein OS=Labeo rohita OX=84645 GN=ROHU_031571 PE=4 SV=1	Labeo rohita
A0A498LLU0		Disintegrin and metallo ase domain-containing 10-like protein	C	representative	0.999	0	6	0	5								A0A498LLU0	1097	2				tr|A0A498LLU0|A0A498LLU0_LABRO Disintegrin and metallo ase domain-containing 10-like protein OS=Labeo rohita OX=84645 GN=ROHU_032733 PE=4 SV=1	Labeo rohita
A0A498LLU1		Interferon-double-stranded RNA-activated kinase-like protein	C	weak	0.813	0	1	0	1								A0A498LLU1	1098	1				tr|A0A498LLU1|A0A498LLU1_LABRO Interferon-double-stranded RNA-activated kinase-like protein OS=Labeo rohita OX=84645 GN=ROHU_031442 PE=3 SV=1	Labeo rohita
A0A498LLU5	RXN06385.1	Putative allantoicase isoform X1	C	representative	0.999	0	197	0	21								A0A498LLU5	1099	4				tr|A0A498LLU5|A0A498LLU5_LABRO Putative allantoicase isoform X1 OS=Labeo rohita OX=84645 GN=ROHU_035149 PE=3 SV=1	Labeo rohita
A0A498MID2	RXN16757.1	Putative allantoicase isoform X1	C	marginally distinguished	0.999	0	197	0	21								A0A498LLU5	1099	4				tr|A0A498MID2|A0A498MID2_LABRO Putative allantoicase isoform X1 OS=Labeo rohita OX=84645 GN=ROHU_027234 PE=3 SV=1	Labeo rohita
A0A498LLU7	RXN13636.1	Growth hormone-inducible transmembrane	C	canonical	0.999	0	21	0	5								A0A498LLU7	1100	1				tr|A0A498LLU7|A0A498LLU7_LABRO Growth hormone-inducible transmembrane OS=Labeo rohita OX=84645 GN=ROHU_028971 PE=3 SV=1	Labeo rohita
A0A498LLV3	RXN09170.1	Complement decay-accelerating factor-like isoform X2	C	canonical	0.998	0	31	0	5								A0A498LLV3	1101	1				tr|A0A498LLV3|A0A498LLV3_LABRO Complement decay-accelerating factor-like isoform X2 OS=Labeo rohita OX=84645 GN=ROHU_011312 PE=4 SV=1	Labeo rohita
A0A498LLW2	RXN09399.1	AT-rich interactive domain-containing 4B-like protein	C	canonical	0.995	0	2	0	2								A0A498LLW2	1102	1				tr|A0A498LLW2|A0A498LLW2_LABRO AT-rich interactive domain-containing 4B-like protein OS=Labeo rohita OX=84645 GN=ROHU_035260 PE=4 SV=1	Labeo rohita
A0A498LLW6	RXN08802.1	Transaldolase (EC 2.2.1.2)	C	canonical	1	0	1668	0	48								A0A498LLW6	1103	1				tr|A0A498LLW6|A0A498LLW6_LABRO Transaldolase OS=Labeo rohita OX=84645 GN=ROHU_011341 PE=4 SV=1	Labeo rohita
A0A498LLX1		Scaffold attachment factor B2-like isoform X1	C	representative	0.999	0	9	0	7								A0A498LLX1	1104	3				tr|A0A498LLX1|A0A498LLX1_LABRO Scaffold attachment factor B2-like isoform X1 OS=Labeo rohita OX=84645 GN=ROHU_035517 PE=4 SV=1	Labeo rohita
A0A498LLX2	RXN09418.1	Runt-related transcription factor	C	representative	0.998	0	6	0	2								A0A498LLX2	1105	3				tr|A0A498LLX2|A0A498LLX2_LABRO Runt-related transcription factor OS=Labeo rohita OX=84645 GN=ROHU_011054 PE=4 SV=1	Labeo rohita
A0A498LLX9		Myoglobin	C	indistinguishable representative	1	0	86	0	6								A0A498LLX9	1106	3				tr|A0A498LLX9|A0A498LLX9_LABRO Myoglobin OS=Labeo rohita OX=84645 GN=ROHU_011173 PE=4 SV=1	Labeo rohita
A0A498LLY0	RXN09419.1	Pre-mRNA-splicing factor syf2	C	canonical	0.999	0	13	0	3								A0A498LLY0	1107	1				tr|A0A498LLY0|A0A498LLY0_LABRO Pre-mRNA-splicing factor syf2 OS=Labeo rohita OX=84645 GN=ROHU_011055 PE=4 SV=1	Labeo rohita
A0A498LLY6		Rab5 GDP GTP exchange factor-like isoform X2	C	indistinguishable representative	0.999	0	5	0	4								A0A498LLY6	1108	2				tr|A0A498LLY6|A0A498LLY6_LABRO Rab5 GDP GTP exchange factor-like isoform X2 OS=Labeo rohita OX=84645 GN=ROHU_011361 PE=4 SV=1	Labeo rohita
A0A498LLY9	RXN09041.1	Phosphatidylinositol 4-kinase type 2-alpha	C	canonical	1	0	26	0	12								A0A498LLY9	1109	1				tr|A0A498LLY9|A0A498LLY9_LABRO Phosphatidylinositol 4-kinase type 2-alpha OS=Labeo rohita OX=84645 GN=ROHU_011183 PE=4 SV=1	Labeo rohita
A0A498LLZ3	RXN08832.1	Tyrosine phosphatase type IVA 2-like isoform X1	C	canonical	0.998	0	3	0	2								A0A498LLZ3	1110	1				tr|A0A498LLZ3|A0A498LLZ3_LABRO Tyrosine phosphatase type IVA 2-like isoform X1 OS=Labeo rohita OX=84645 GN=ROHU_011371 PE=4 SV=1	Labeo rohita
A0A498LLZ9	RXN09439.1	Peptide chain release factor 1-mitochondrial isoform X2	C	canonical	0.996	0	3	0	2								A0A498LLZ9	1111	1				tr|A0A498LLZ9|A0A498LLZ9_LABRO Peptide chain release factor 1-mitochondrial isoform X2 OS=Labeo rohita OX=84645 GN=ROHU_011075 PE=4 SV=1	Labeo rohita
A0A498LM02	RXN08842.1	Glucosamine 6-phosphate N-acetyltransferase (EC 2.3.1.4)	C	canonical	1	0	37	0	5								A0A498LM02	1112	1				tr|A0A498LM02|A0A498LM02_LABRO Glucosamine 6-phosphate N-acetyltransferase OS=Labeo rohita OX=84645 GN=ROHU_011381 PE=3 SV=1	Labeo rohita
A0A498LM03	RXN09448.1	Fibulin-7 isoform X1	C	canonical	0.999	0	48	0	8								A0A498LM03	1113	1				tr|A0A498LM03|A0A498LM03_LABRO Fibulin-7 isoform X1 OS=Labeo rohita OX=84645 GN=ROHU_011084 PE=4 SV=1	Labeo rohita
A0A498LM17	RXN09230.1	Protein FAM207A-like	C	weak	0.984	0	1	0	1								A0A498LM17	1114	1				tr|A0A498LM17|A0A498LM17_LABRO Protein FAM207A-like OS=Labeo rohita OX=84645 GN=ROHU_031467 PE=4 SV=1	Labeo rohita
A0A498LM18		Zinc finger CCCH domain-containing 6-like protein	C	weak	0.788	0	1	0	1								A0A498LM18	1115	1				tr|A0A498LM18|A0A498LM18_LABRO Zinc finger CCCH domain-containing 6-like protein OS=Labeo rohita OX=84645 GN=ROHU_035258 PE=4 SV=1	Labeo rohita
A0A498LM31	RXN09081.1	ATP-binding cassette sub-family A member 1-like isoform X1	C	canonical	0.994	0	4	0	3								A0A498LM31	1116	1				tr|A0A498LM31|A0A498LM31_LABRO ATP-binding cassette sub-family A member 1-like isoform X1 OS=Labeo rohita OX=84645 GN=ROHU_011223 PE=4 SV=1	Labeo rohita
A0A498L8V5	RXN13717.1	Peroxiredoxin-4	C	canonical	1	0	1572	0	52								A0A498LM50	1117	6				tr|A0A498L8V5|A0A498L8V5_LABRO Peroxiredoxin-4 OS=Labeo rohita OX=84645 GN=ROHU_009509 PE=4 SV=1	Labeo rohita
A0A498LEG1	RXN03745.1	Thioredoxin-dependent peroxide mitochondrial	C	marginally distinguished	1	0	1688	0	36								A0A498LM50	1117	6				tr|A0A498LEG1|A0A498LEG1_LABRO Thioredoxin-dependent peroxide mitochondrial OS=Labeo rohita OX=84645 GN=ROHU_013195 PE=4 SV=1	Labeo rohita
A0A498LM50	RXN09101.1	Peroxiredoxin-1-like protein	C	canonical	1	0	5668	0	105								A0A498LM50	1117	6				tr|A0A498LM50|A0A498LM50_LABRO Peroxiredoxin-1-like protein OS=Labeo rohita OX=84645 GN=ROHU_011243 PE=4 SV=1	Labeo rohita
A0A498M0B1	RXN06742.1	Peroxiredoxin-1	C	canonical	1	0	3337	0	58								A0A498LM50	1117	6				tr|A0A498M0B1|A0A498M0B1_LABRO Peroxiredoxin-1 OS=Labeo rohita OX=84645 GN=ROHU_009291 PE=4 SV=1	Labeo rohita
A0A498LM58	RXN06677.1	Cerebellar degeneration-related 2-like protein	C	canonical	0.999	0	5	0	3								A0A498LM58	1118	1				tr|A0A498LM58|A0A498LM58_LABRO Cerebellar degeneration-related 2-like protein OS=Labeo rohita OX=84645 GN=ROHU_012274 PE=4 SV=1	Labeo rohita
A0A498LM62	RXN08912.1	PH and SEC7 domain-containing 1-like protein	C	canonical	0.999	0	10	0	3								A0A498LM62	1119	1				tr|A0A498LM62|A0A498LM62_LABRO PH and SEC7 domain-containing 1-like protein OS=Labeo rohita OX=84645 GN=ROHU_011451 PE=4 SV=1	Labeo rohita
A0A498LM63	RXN27263.1	Diphosphoinositol polyphosphate phosphohydrolase 3-beta-like protein	C	weak	0.989	0	1	0	1								A0A498LM63	1120	1				tr|A0A498LM63|A0A498LM63_LABRO Diphosphoinositol polyphosphate phosphohydrolase 3-beta-like protein OS=Labeo rohita OX=84645 GN=ROHU_020254 PE=4 SV=1	Labeo rohita
A0A498LM66	RXN09121.1	Testis-specific gene 10 protein	C	canonical	0.996	0	3	0	2								A0A498LM66	1121	1				tr|A0A498LM66|A0A498LM66_LABRO Testis-specific gene 10 protein OS=Labeo rohita OX=84645 GN=ROHU_011263 PE=4 SV=1	Labeo rohita
A0A498LM70	RXN27273.1	YEATS domain-containing 4	C	canonical	0.959	0	6	0	2								A0A498LM70	1122	1				tr|A0A498LM70|A0A498LM70_LABRO YEATS domain-containing 4 OS=Labeo rohita OX=84645 GN=ROHU_020264 PE=4 SV=1	Labeo rohita
A0A498LM79	RXN09240.1	Pantothenate kinase (EC 2.7.1.33)	C	representative	0.999	0	40	0	9								A0A498LM79	1123	2				tr|A0A498LM79|A0A498LM79_LABRO Pantothenate kinase OS=Labeo rohita OX=84645 GN=ROHU_031477 PE=3 SV=1	Labeo rohita
A0A498LM84		Contactin-4-like isoform X1	C	representative	0.995	0	2	0	2								A0A498LM84	1124	4				tr|A0A498LM84|A0A498LM84_LABRO Contactin-4-like isoform X1 OS=Labeo rohita OX=84645 GN=ROHU_011293 PE=4 SV=1	Labeo rohita
A0A498LM91		Activating signal cointegrator 1 complex subunit 1	C	canonical	0.996	0	2	0	2								A0A498LM91	1125	1				tr|A0A498LM91|A0A498LM91_LABRO Activating signal cointegrator 1 complex subunit 1 OS=Labeo rohita OX=84645 GN=ROHU_011491 PE=4 SV=1	Labeo rohita
A0A498LMA3	RXN07884.1	E3 ubiquitin-ligase UHRF2	C	weak	0.95	0	1	0	1								A0A498LMA3	1126	1				tr|A0A498LMA3|A0A498LMA3_LABRO E3 ubiquitin-ligase UHRF2 OS=Labeo rohita OX=84645 GN=ROHU_032084 PE=4 SV=1	Labeo rohita
A0A498LMA8	RXN08972.1	Survival of motor neuron-related-splicing factor 30	C	weak	0.987	0	1	0	1								A0A498LMA8	1127	1				tr|A0A498LMA8|A0A498LMA8_LABRO Survival of motor neuron-related-splicing factor 30 OS=Labeo rohita OX=84645 GN=ROHU_001244 PE=4 SV=1	Labeo rohita
A0A498LMB6		Transmembrane protein 109-like isoform X2	C	representative	0.999	0	11	0	4								A0A498LMB6	1128	1				tr|A0A498LMB6|A0A498LMB6_LABRO Transmembrane protein 109-like isoform X2 OS=Labeo rohita OX=84645 GN=ROHU_011111 PE=4 SV=1	Labeo rohita
A0A498LMC3	RXN06697.1	Voltage-dependent calcium channel gamma-1 subunit (Dihydropyridine-sensitive L-type, skeletal muscle calcium channel subunit gamma)	C	canonical	0.999	0	7	0	2								A0A498LMC3	1129	1				tr|A0A498LMC3|A0A498LMC3_LABRO Voltage-dependent calcium channel gamma-1 subunit OS=Labeo rohita OX=84645 GN=ROHU_012294 PE=3 SV=1	Labeo rohita
A0A498LMD6	RXN08246.1	Glutathione peroxidase	C	canonical	1	0	92	0	12								A0A498LMD6	1130	1				tr|A0A498LMD6|A0A498LMD6_LABRO Glutathione peroxidase OS=Labeo rohita OX=84645 GN=ROHU_031930 PE=3 SV=1	Labeo rohita
A0A498LMD9	RXN07924.1	Acylphosphatase (EC 3.6.1.7)	C	canonical	0.999	0	27	0	4								A0A498LMD9	1131	1				tr|A0A498LMD9|A0A498LMD9_LABRO Acylphosphatase OS=Labeo rohita OX=84645 GN=ROHU_032066 PE=3 SV=1	Labeo rohita
A0A498LME6		DPY30 domain-containing 1-like protein	C	insufficient evidence	0.96	0	1	0	1								A0A498LME6	1132	1				tr|A0A498LME6|A0A498LME6_LABRO DPY30 domain-containing 1-like protein OS=Labeo rohita OX=84645 GN=ROHU_031580 PE=4 SV=1	Labeo rohita
[truncated: 7,674 more rows]

## Sheet: Organ_wise_can_prots
		Total canonical proteins	NCBI ID	Protein name			Organ	Canonical proteins	Uniquely detected canonical proteins			AB	Brain	Embryo	Eye	FG	Fin	GB	Gill	Gut	Heart	Kidney	Liver	MG	Muscle	Plasma	Scales	Skin	SC	Spleen			Total canonical proteins	AB	Brain	Embryo	Eye	FG	Fin	GB	Gill	Gut	Heart	Kidney	Liver	MG	Muscle	Plasma	Scales
[truncated: 6,015 more rows]
[truncated: 3 more columns]

[truncated: 20 more sheets: Canonical Protein eggNOG output, AB eggNOG output, Brain eggNOG output, Embryo eggNOG output, Eye eggNOG output, FG eggNOG output, Fin eggNOG output, GB eggNOG output, Gill eggNOG output, Gut eggNOG output, Heart eggNOG output, Kidney eggNOG output, Liver eggNOG output, MG eggNOG output, Muscle eggNOG output, Plasma eggNOG output, Scale eggNOG output, Skin eggNOG output, SC eggNOG output, Spleen eggNOG output]
